# Supplementary material for: Coordinated molecular and ecological adaptations underlie a highly successful parasitoid
Source: eLife. 2024 Jun 21;13:RP94748. doi: 10.7554/eLife.94748 (PMC11192535; doi:10.7554/eLife.94748)
Supplement: Figure 1—source data 1. [file elife-94748-fig1-data1.xlsx]

## Sheet: Figure 1B
Source Data of Figure 1B
Figure 1B: The parasitism rates in six Drosophila species parasitized by Aj and Td.
Summary Statistics
Sidak's multiple comparisons test	Mean of Aj	Mean of Td	Mean Diff.	95.00% CI of diff.	Significant?	Summary	P Value
Aj - Td
Dmel	84.8	84.72	0.07481	-9.349 to 9.498	No	ns	>0.9999
Dsim	84.49	80.1	4.385	-4.696 to 13.47	No	ns	0.7285
Dsan	82.01	80.59	1.426	-7.879 to 10.73	No	ns	0.9989
Dsuz	60.02	84.62	-24.6	-32.76 to -16.44	Yes	***	<0.001
Dpse	78.3	88.84	-10.54	-19.35 to -1.721	Yes	*	0.0111
Dvir	84.94	82.44	2.503	-6.312 to 11.32	No	ns	0.9707
Source Data
	Parasitoid: Aj						Parasitoid: Td
Host	Number of emerged host adults	Number of total hosts	Parasitism rate (%)			Host	Number of emerged host adults	Number of total hosts	Parasitism rate (%)
Dmel	15	102	85.2941			Dmel	8	60	86.6667
	18	74	75.6757				7	60	88.3333
	6	46	86.9565				12	60	80
	5	60	91.6667				8	60	86.6667
	8	74	89.1892				10	60	83.3333
	14	70	80				10	60	83.3333
Dsim	10	91	89.011			Dsim	15	63	76.1905
	18	116	84.4828				13	63	79.3651
	9	56	83.9286				8	63	87.3016
	15	102	85.2941				10	63	84.127
	12	76	84.2105				21	83	74.6988
	20	100	80				14	83	83.1325
Dsan	24	89	73.0337				20	83	75.9036
	12	70	82.8571			Dsan	12	60	80
	23	88	73.8636				6	39	84.6154
	6	59	89.8305				15	60	75
	10	105	90.4762				8	60	86.6667
Dsuz	36	62	41.9355				14	60	76.6667
	34	86	60.4651				10	60	83.3333
	34	88	61.3636				10	43	76.7442
	20	70	71.4286				11	60	81.6667
	28	92	69.5652			Dsuz	4	32	87.5
	17	47	63.8298				11	54	79.6296
	32	76	57.8947				5	40	87.5
	38	82	53.6585				9	40	77.5
Dpse	15	116	87.069				3	43	93.0233
	15	77	80.5195				6	50	88
	11	64	82.8125				8	40	80
	11	52	78.8462				6	37	83.7838
	25	66	62.1212			Dpse	13	65	80
	22	102	78.4314				10	66	84.8485
Dvir	18	110	83.6364				6	57	89.4737
	21	119	82.3529				3	61	95.082
	8	89	91.0112				4	65	93.8462
	11	87	87.3563				7	68	89.7059
	10	80	87.5				7	69	89.8551
	16	72	77.7778				8	66	87.8788
						Dvir	4	48	91.6667
							5	66	92.4242
							14	64	78.125
							11	68	83.8235
							12	65	81.5385
							14	64	78.125
							14	66	78.7879
							17	68	75
