# Supplementary material for: Coordinated molecular and ecological adaptations underlie a highly successful parasitoid
Source: eLife. 2024 Jun 21;13:RP94748. doi: 10.7554/eLife.94748 (PMC11192535; doi:10.7554/eLife.94748)
Supplement: Figure 1—source data 2. [file elife-94748-fig1-data2.xlsx]

## Sheet: Figure 1C
Source Data of Figure 1C
Figure 1C: Wasp emergence rates in six Drosophila species parasitized by Aj and Td.
Summary Statistics
Sidak's multiple comparisons test	Mean of Aj	Mean of Td	Mean Diff.	95.00% CI of diff.	Significant?	Summary	P Value
Aj - Td
Dmel	79.51	76.94	2.568	-10.76 to 15.89	No	ns	0.9961
Dsim	76.58	72.83	3.751	-9.088 to 16.59	No	ns	0.9663
Dsan	73.2	21.7	51.5	38.35 to 64.66	Yes	***	<0.001
Dsuz	47.67	76.82	-29.15	-40.69 to -17.61	Yes	***	<0.001
Dpse	62.41	78.53	-16.12	-28.58 to -3.656	Yes	**	0.0048
Dvir	73.04	76.55	-3.512	-15.98 to 8.952	No	ns	0.9717
Source Data
	Parasitoid: Aj						Parasitoid: Td
Host	Number of emerged wasps	Number of total hosts	Wasp emergence rate (%)			Host	Number of emerged wasps	Number of total hosts	Wasp emergence rate (%)
Dmel	85	102	83.3333			Dmel	51	60	85
	48	74	64.8649				49	60	81.6667
	39	46	84.7826				46	60	76.6667
	54	60	90				48	60	80
	58	74	78.3784				47	60	78.3333
	53	70	75.7143				36	60	60
Dsim	64	91	70.3297			Dsim	37	63	58.7302
	93	116	80.1724				48	63	76.1905
	47	56	83.9286				50	63	79.3651
	83	102	81.3725				45	63	71.4286
	56	76	73.6842				60	83	72.2892
	70	100	70				65	83	78.3133
Dsan	59	89	66.2921				61	83	73.494
	47	70	67.1429			Dsan	7	60	11.6667
	58	88	65.9091				7	39	17.9487
	50	59	84.7458				10	60	16.6667
	86	105	81.9048				21	60	35
Dsuz	20	62	32.2581				13	60	21.6667
	44	86	51.1628				16	60	26.6667
	38	88	43.1818				6	43	13.9535
	46	70	65.7143				18	60	30
	56	92	60.8696			Dsuz	27	32	84.375
	20	47	42.5532				35	54	64.8148
	28	76	36.8421				34	40	85
	40	82	48.7805				28	40	70
Dpse	86	116	74.1379				35	43	81.3953
	47	77	61.039				43	50	86
	40	64	62.5				28	40	70
	36	52	69.2308				27	37	72.973
	27	66	40.9091			Dpse	52	65	80
	68	102	66.6667				53	66	80.303
Dvir	80	110	72.7273				42	57	73.6842
	73	119	61.3445				42	61	68.8525
	67	89	75.2809				57	65	87.6923
	69	87	79.3103				55	68	80.8824
	63	80	78.75				57	69	82.6087
	51	72	70.8333				49	66	74.2424
						Dvir	41	48	85.4167
							57	66	86.3636
							49	64	76.5625
							56	68	82.3529
							52	65	80
							45	64	70.3125
							45	66	68.1818
							43	68	63.2353
