# Supplementary material for: Coordinated molecular and ecological adaptations underlie a highly successful parasitoid
Source: eLife. 2024 Jun 21;13:RP94748. doi: 10.7554/eLife.94748 (PMC11192535; doi:10.7554/eLife.94748)
Supplement: Figure 4—figure supplement 2—source data 1. [file elife-94748-fig4-figsupp2-data1.xlsx]

## Sheet: Figure 4—figure supplement 2A
Source Data of Figure 4—figure supplement 2A
Figure 4—figure supplement 2A: The teratocyte numbers in single D. suzukii host of different days post Td parasitization
	Days post parasitization
	1 day	2 day	3 day	4 day	5 day	6 day	7 day	8 day
host 1	100	106	92	89	55	0	0	0
host 2	112	92	80	70	53	40	0	0
host 3	90	100	100	96	54	55	16	0
host 4	102	103	96	84	73	40	23	0
host 5	104	88	72	90	46	39	0	0
host 6	105	93	96	91	64	0	15	0
host 7	97	93	88	87	43	21	0	0
host 8	93	90	108	91	42	27	0	0
host 9	107	96	101	84	78	40	35	0
host 10	97	90	86	71	66	0	0	0
host 11	98	102	96	86	57	67	27	0
host 12	99	97	108	68	56	32	20	0
host 13	105	94	93	71	71	31	0	0
host 14	90	98	85	86	58	0	0	10
host 15	91	98	84	72	62	45	0	0
host 16	95	106	76	73	56	48	0	0
host 17	102	87	104	88	57	20	0	0
host 18	97	100	110	80	60	28	6	0
host 19	104	92	81	73	56	31	20	0
host 20	94	95	106	84	54	27	25	0
host 21	92	99	83	76	60	40	0	10
host 22	106	95	89	77	54	48	37	0
host 23	102	99	97	78	76	14	0	0
host 24	93	106	108	91	46	35	20	0
host 25	107	93	94	71	47	27	0	0
host 26	92	89	82	88	50	65	0	0
host 27	100	92	90	90	54	44	0	0
host 28	101	97	103	86	53	47	0	0
host 29	96	97	87	77	63	12	0	12
host 30	94	100	84	82	57	55	0	0
host 31	97	103	90	90	58	41	20	14
