# Supplementary material for: Coordinated molecular and ecological adaptations underlie a highly successful parasitoid
Source: eLife. 2024 Jun 21;13:RP94748. doi: 10.7554/eLife.94748 (PMC11192535; doi:10.7554/eLife.94748)
Supplement: Figure 4—figure supplement 2—source data 2. [file elife-94748-fig4-figsupp2-data2.xlsx]

## Sheet: Figure 4—figure supplement 2B
Source Data of Figure 4—figure supplement 2B
Figure 4—figure supplement 2B: The teratocyte diameters in D. suzukii host of different days post Td parasitization
	Days post parasitization
Teratocyte diameters (μm)	1 day	2 day	3 day	4 day
	68.807	156.366	257.482	199.425
	71.343	130.716	200.459	295.116
	75.249	140.951	285.383	279.179
	71.875	160.446	260.87	293.838
	87.458	184.674	289.283	185.697
	71.832	192.639	272.35	187.922
	64.275	131.152	241.49	176.558
	69.277	200.08	253.977	274.591
	71.832	168.803	221.143	169.421
	71.352	175.464	231.167	195.921
	76.366	168.86	260.811	324.659
	73.607	183.186	248.28	205.397
	94.59	172.937	258.533	307.267
	85.63	185.2	362.186	181.058
	94.078	132.817	234.613	364.338
	90.948	199.944	250.004	226.644
	100.249	180.554	223.297	252.846
	99.32	188.989	359.232	312.31
	99.258	192.595	392.935	194.752
	86.368	167.414	308.346	215.496
	81.705	153.628	256.377	231.298
	100.244	166.325	267.68	289.33
	84.878	117.577	283.669	202.839
	105.82	185.684	150.974	322.89
	105.26	159.503	296.606	217.828
	98.184	150.562	232.361	216.588
	99.055	185.007	287.511	209.669
	112.56	184.674	250.55	207.388
	96.813	138.553	296.291	280.401
	68.807	142.112	214.307	205.005
	71.343	138.037	187.974	219.81
	75.249	159.779	269.14	342.255
	71.875	166.143	227.284	197.059
	87.458	119.937	262.148	234.616
	71.832	189.215	216.978	281.345
	64.275	185.924	244.866	232.436
	69.277	175.405	229.148	350.622
	71.832	172.068	313.299	165.538
	71.352	174.069	199.366	226.644
	76.366	155.632	281.539	308.745
	73.607	177.511	274.938	331.657
	94.59	169.528	261.01	227.783
	85.63	174.3	313.253	211.848
	94.078	201.401	237.681	316.633
	90.948	193.683	188.043	231.344
	100.249	161.92	210.08	290.422
	99.32	189.453	305.329	151.491
	99.258	127.23	312.918	227.913
	86.368	194.615	251.749	317.918
	81.705	140.365	287.114	331.42
	100.244	191.186	312.526
	84.878	196.793	243.996
		168
