# Supplementary material for: Coordinated molecular and ecological adaptations underlie a highly successful parasitoid
Source: eLife. 2024 Jun 21;13:RP94748. doi: 10.7554/eLife.94748 (PMC11192535; doi:10.7554/eLife.94748)
Supplement: Figure 4—figure supplement 4—source data 1. [file elife-94748-fig4-figsupp4-data1.xlsx]

## Sheet: Figure 4—figure supplement 4C
Source Data of Figure 4—figure supplement 4C
Figure 4—figure supplement 4C: The wasp emergence rate in D. suzukii parasitized by Td after injection of different amounts of TPCK (10 ng, 100 ng, 200 ng per host pupa).
Summary Statistics
ANOVA table	SS	DF	MS	F (DFn, DFd)	P value
Treatment (between columns)	4961	3	1654	F (3, 8) = 343.9	P<0.0001
Residual (within columns)	38.47	8	4.809
Total	5000	11
Sidak's multiple comparisons test	Mean Diff.	95.00% CI of diff.	Significant?	Summary	P Value
10 ng vs. CK	1.303	-4.900 to 7.506	No	ns	0.9819
100 ng vs. CK	-18.62	-24.83 to -12.42	Yes	***	<0.001
200 ng vs. CK	-49.06	-55.26 to -42.86	Yes	***	<0.001
100 ng vs. 10 ng	-19.92	-26.13 to -13.72	Yes	***	<0.001
200 ng vs. 10 ng	-50.36	-56.57 to -44.16	Yes	***	<0.001
200 ng vs. 100 ng	-30.44	-36.64 to -24.23	Yes	***	<0.001
Source Data
	Number of emerged wasps	Number of total hosts	Wasp emergence rate (%)
CK	28	31	90.3226
	30	34	88.2353
	29	34	85.2941
10 ng	27	30	90
	31	35	88.5714
	33	37	89.1892
100 ng	22	33	66.6667
	25	36	69.4444
	23	32	71.875
200 ng	22	56	39.2857
	12	33	36.3636
	16	39	41.0256
