# Supplementary material for: Coordinated molecular and ecological adaptations underlie a highly successful parasitoid
Source: eLife. 2024 Jun 21;13:RP94748. doi: 10.7554/eLife.94748 (PMC11192535; doi:10.7554/eLife.94748)
Supplement: Figure 4—figure supplement 5—source data 1. [file elife-94748-fig4-figsupp5-data1.xlsx]

## Sheet: Figure 4—figure supplement 5
Source Data of Figure 4—figure supplement 5
Figure 4—figure supplement 5: The length of the Td larvae in CK (H2O) and TLCK-injected hosts after 96 h and 144 h parasitization.
Summary Statistics
Sidak's multiple comparisons test	Mean of monoparasitism	Mean of superparasitism	Mean Diff.	95.00% CI of diff.	Significant?	Summary	P Value
CK - TLCK-injected
96 h	852	589.9	262.1	176.3 to 347.9	Yes	***	<0.001
144 h	1087	637.7	448.9	363.3 to 534.6	Yes	***	<0.001
Source Data
Td larvae length (μm)
96 h		144 h
CK	TLCK-injected	CK	TLCK-injected
808.89	454.13	976.76	481.2
801.2	714.29	1058.54	547.21
828.28	459.03	1088.52	594.78
812.34	738.85	869.6	530.97
811.71	550.2	921.45	889.57
1002.16	471.97	829.8	461.75
944.31	822.63	883.43	510.6
947.3	630.56	976.68	530.96
751.83	645.61	1292.68	720.63
764.74	520.76	1300.9	552.41
1052.14	534.86	1146.19	688.84
773.51	557.91	1255.77	723.33
779.74	470.26	1074.43	700.7
982.71	536.32	1056.4	539.1
911.26	503	1398	533.01
1020.12	512.11	1197	570.3
890.31	642.75	1297.38	923.91
887.33	529.9	1232.91	427.47
770.2	753.15	966.2	657.04
707.34	625.14	789.4	609.11
684.3	449.21	1191.2	798.28
822.02	702.17	1087.3	678.16
721.3	809.1	1101.53	679.03
891.44	500.43		609.43
933.7	567.9		558.95
	811.6		865.4
	413.2		464.28
			555
			728.71
			1000.41
