# Supplementary material for: Coordinated molecular and ecological adaptations underlie a highly successful parasitoid
Source: eLife. 2024 Jun 21;13:RP94748. doi: 10.7554/eLife.94748 (PMC11192535; doi:10.7554/eLife.94748)
Supplement: Figure 4—source data 1. [file elife-94748-fig4-data1.xlsx]

## Sheet: Figure 4F
Source Data of Figure 4F
Figure 4F: The wasp emergence rate in D. suzukii parasitized by Td after injection of different amounts of TLCK (20 ng, 200 ng, 400 ng per host pupa).
Summary Statistics
ANOVA table	SS	DF	MS	F (DFn, DFd)	P value
Treatment (between columns)	5699	3	1900	F (3, 8) = 130.9	P<0.0001
Residual (within columns)	116.1	8	14.51
Total	5815	11
Sidak's multiple comparisons test	Mean Diff.	95.00% CI of diff.	Significant?	Summary	P Value
20 ng vs. CK	-22.32	-33.10 to -11.55	Yes	***	<0.001
200 ng vs. CK	-46.65	-57.42 to -35.88	Yes	***	<0.001
400 ng vs. CK	-55.87	-66.64 to -45.10	Yes	***	<0.001
200 ng vs. 20 ng	-24.33	-35.10 to -13.55	Yes	***	<0.001
400 ng vs. 20 ng	-33.55	-44.32 to -22.77	Yes	***	<0.001
400 ng vs. 200 ng	-9.219	-19.99 to 1.554	No	ns	0.1034
Source Data
	Number of emerged wasps	Number of total hosts	Wasp emergence rate (%)
CK	28	30	93.3333
	36	39	92.3077
	48	54	88.8889
20 ng	23	34	67.6471
	21	32	65.625
	26	35	74.2857
200 ng	15	31	48.3871
	13	30	43.3333
	18	42	42.8571
400 ng	11	36	30.5556
	12	33	36.3636
	16	40	40
