# Supplementary material for: Coordinated molecular and ecological adaptations underlie a highly successful parasitoid
Source: eLife. 2024 Jun 21;13:RP94748. doi: 10.7554/eLife.94748 (PMC11192535; doi:10.7554/eLife.94748)
Supplement: Figure 5—figure supplement 1—source data 1. [file elife-94748-fig5-figsupp1-data1.xlsx]

## Sheet: Figure 5—figure supplement 1A
Source Data of Figure 5—figure supplement 1A
Figure 5—figure supplement 1A: Parasitism rates in 1- to 4-day-old D.melanogaster pupae after monoparasitism or superparasitism by Td
Summary Statistics
Sidak's multiple comparisons test	Mean of monoparasitism	Mean of superparasitism	Mean Diff.	95.00% CI of diff.	Significant?	Summary	P Value
monoparasitism - superparasitism
1-day	0.8667	0.9699	-0.1032	-0.1671 to -0.03930	Yes	***	<0.001
2-day	0.851	0.9723	-0.1213	-0.1852 to -0.05742	Yes	***	<0.001
3-day	0.7907	0.9509	-0.1602	-0.2241 to -0.09630	Yes	***	<0.001
4-day	0.3943	0.9559	-0.5616	-0.6255 to -0.4977	Yes	***	<0.001
Source Data
	monoparasitism						superparasitism
Host	Number of emerged host adults	Number of total hosts	Parasitism rate (%)			Host	Number of emerged host adults	Number of total hosts	Parasitism rate (%)
1-day	11	60	81.6667			1-day	2	61	96.7213
	11	60	81.6667				4	61	93.4426
	8	60	86.6667				2	60	96.6667
	4	60	93.3333				2	61	96.7213
	9	60	85				0	60	100
	5	60	91.6667				1	61	98.3607
2-day	10	60	83.3333			2-day	0	61	100
	10	61	83.6066				0	60	100
	7	60	88.3333				1	60	98.3333
	5	60	91.6667				4	60	93.3333
	10	60	83.3333				2	61	96.7213
	12	61	80.3279				3	60	95
3-day	17	60	71.6667			3-day	3	61	95.082
	16	61	73.7705				3	60	95
	11	61	81.9672				4	61	93.4426
	10	60	83.3333				2	60	96.6667
	10	60	83.3333				6	62	90.3226
	12	61	80.3279				0	62	100
4-day	37	60	38.3333			4-day	0	68	100
	43	61	29.5082				0	60	100
	38	62	38.7097				5	60	91.6667
	36	60	40				6	61	90.1639
	35	60	41.6667				3	60	95
	32	62	48.3871				2	61	96.7213
