# Supplementary material for: Coordinated molecular and ecological adaptations underlie a highly successful parasitoid
Source: eLife. 2024 Jun 21;13:RP94748. doi: 10.7554/eLife.94748 (PMC11192535; doi:10.7554/eLife.94748)
Supplement: Figure 5—figure supplement 1—source data 2. [file elife-94748-fig5-figsupp1-data2.xlsx]

## Sheet: Figure 5—figure supplement 1B
Source Data of Figure 5—figure supplement 1B
Figure 5—figure supplement 1B: Wasp emergence rates in 1- to 4-day-old D. melanogaster pupae after monoparasitism or superparasitism by Td
Summary Statistics
Sidak's multiple comparisons test	Mean of monoparasitism	Mean of superparasitism	Mean Diff.	95.00% CI of diff.	Significant?	Summary	P Value
monoparasitism - superparasitism
1-day	0.7806	0.8572	-0.07664	-0.1686 to 0.01534	No	ns	0.1355
2-day	0.7679	0.8979	-0.1299	-0.2219 to -0.03794	Yes	**	0.0027
3-day	0.6998	0.8085	-0.1087	-0.2007 to -0.01673	Yes	*	0.0148
4-day	0.1859	0.6982	-0.5123	-0.6043 to -0.4203	Yes	***	<0.001
Source Data
	monoparasitism						superparasitism
Host	Number of emerged wasps	Number of total hosts	Wasp emergence rate (%)			Host	Number of emerged wasps	Number of total hosts	Wasp emergence rate (%)
1-day	47	60	78.3333			1-day	54	61	88.5246
	41	60	68.3333				50	61	81.9672
	47	60	78.3333				52	60	86.6667
	49	60	81.6667				50	61	81.9672
	48	60	80				52	60	86.6667
	49	60	81.6667				54	61	88.5246
2-day	47	60	78.3333			2-day	55	61	90.1639
	49	61	80.3279				58	60	96.6667
	50	60	83.3333				52	60	86.6667
	42	60	70				53	60	88.3333
	45	60	75				53	61	86.8852
	45	61	73.7705				54	60	90
3-day	35	60	58.3333			3-day	52	61	85.2459
	37	61	60.6557				44	60	73.3333
	42	61	68.8525				51	61	83.6066
	48	60	80				48	60	80
	44	60	73.3333				51	62	82.2581
	48	61	78.6885				50	62	80.6452
4-day	5	60	8.33333			4-day	45	68	66.1765
	8	61	13.1148				51	60	85
	11	62	17.7419				44	60	73.3333
	12	60	20				42	61	68.8525
	14	60	23.3333				36	60	60
	18	62	29.0323				40	61	65.5738
