# Supplementary material for: Coordinated molecular and ecological adaptations underlie a highly successful parasitoid
Source: eLife. 2024 Jun 21;13:RP94748. doi: 10.7554/eLife.94748 (PMC11192535; doi:10.7554/eLife.94748)
Supplement: Figure 5—figure supplement 1—source data 4. [file elife-94748-fig5-figsupp1-data4.xlsx]

## Sheet: Figure 5—figure supplement 1D
Source Data of Figure 5—figure supplement 1D
Figure 5—figure supplement 1D: The size of the venom gland (VG) and venom reservoir (VR) of Td females emerged from young and old D. melanogaster hosts.
Summary Statistics
From young hosts vs.from old hosts
VG size			VR size
Unpaired t test			Unpaired t test
P value	<0.001		P value	<0.001
P value summary	***		P value summary	***
Significantly different?	Yes		Significantly different?	Yes
One- or two-tailed P value?	Two-tailed		One- or two-tailed P value?	Two-tailed
t, df	t=4.552, df=59		t, df	t=9.733, df=59
Source Data
VG size (103 μm2)			VR size (103 μm2)
From young hosts	From old hosts		From young hosts	From old hosts
6	6.24		21.16	12.28
9.42	10.01		17.5	12.75
7.64	8.7		17.48	13.43
7.83	7.41		16.78	16.27
8.3	6.62		16.78	17.2
12.53	6.71		20.21	14.37
7.47	6.14		20.14	15.12
10.9	7.78		16.92	15.3
9.27	6.76		22.16	14
12.25	7.75		19.68	14.33
9.62	7.71		20.79	17.12
10.46	5.55		22.91	10.51
6.87	7.46		21.87	12.08
9.38	7.53		21.2	13.83
9.04	7.04		21.08	16.54
11.26	7.51		19.66	14.45
6.72	6.14		21.91	14.74
9.32	6.58		21.01	15.04
7.53	7.04		21.01	16.62
11.53	7.05		17.69	17.53
8.41	6.85		18.55	12.85
9.97	7.02		18.72	13.68
8.45	7.73		17.91	16.4
6.92	7.69		21.37	16.14
11.44	7.97		17.35	16.16
7.6	8.05		20.59	18.43
8.52	8.45		21.29	18.49
8.49	7.68		20.99	16.51
8.62	7.89		22.83	17.56
6.98			20.16
9.12			20.97
8.11			19.67
