# Supplementary material for: Coordinated molecular and ecological adaptations underlie a highly successful parasitoid
Source: eLife. 2024 Jun 21;13:RP94748. doi: 10.7554/eLife.94748 (PMC11192535; doi:10.7554/eLife.94748)
Supplement: Figure 5—figure supplement 1—source data 5. [file elife-94748-fig5-figsupp1-data5.xlsx]

## Sheet: Figure 5—figure supplement 1E
Source Data of Figure 5—figure supplement 1E
Figure 5—figure supplement 1E: The egg number of Td females emerged from young and old D. melanogaster hosts.
Summary Statistics
From young hosts vs. from old hosts
Unpaired t test
P value	<0.001
P value summary	***
Significantly different?	Yes
One- or two-tailed P value?	Two-tailed
t, df	t=15.12, df=62
Source Data
Egg number per female
From young hosts	From old hosts
124	111
120	107
136	83
120	86
112	94
124	80
125	94
121	97
117	92
128	90
117	80
132	76
107	96
135	92
138	100
115	97
118	71
137	77
120	96
132	98
124	95
120	99
118	74
116	91
124	86
118	87
120	76
124	81
121	76
113	82
125	79
118
112
