# Supplementary material for: Coordinated molecular and ecological adaptations underlie a highly successful parasitoid
Source: eLife. 2024 Jun 21;13:RP94748. doi: 10.7554/eLife.94748 (PMC11192535; doi:10.7554/eLife.94748)
Supplement: Figure 5—figure supplement 1—source data 6. [file elife-94748-fig5-figsupp1-data6.xlsx]

## Sheet: Figure 5—figure supplement 1F
Source Data of Figure 5—figure supplement 1F
Figure 5—figure supplement 1F: Oviposition indices of Td females in different aged D. melanogaster hosts from 2 h and 4 h assays
Summary Statistics
2 h assay						4 h assay
	1-day vs. 1-day	1-day vs. 2-day	1-day vs. 3-day	1-day vs. 4-day			1-day vs. 1-day	1-day vs. 2-day	1-day vs. 3-day	1-day vs. 4-day
Theoretical median	0	0	0	0		Theoretical median	0	0	0	0
Actual median	-0.02857	0	-0.03226	-0.0303		Actual median	0.01587	-0.03125	0.01449	-0.05263
Number of values	5	5	5	5		Number of values	5	5	5	5
Wilcoxon Signed Rank Test						Wilcoxon Signed Rank Test
Sum of signed ranks (W)	-3	2	-1	1		Sum of signed ranks (W)	1	-4	5	-9
Sum of positive ranks	6	6	7	8		Sum of positive ranks	8	5.5	10	3
Sum of negative ranks	-9	-4	-8	-7		Sum of negative ranks	-7	-9.5	-5	-12
P value (two tailed)	0.8125	0.875	>0.9999	>0.9999		P value (two tailed)	>0.9999	0.6875	0.625	0.3125
Exact or estimate?	Exact	Exact	Exact	Exact		Exact or estimate?	Exact	Exact	Exact	Exact
P value summary	ns	ns	ns	ns		P value summary	ns	ns	ns	ns
Significant ?	No	No	No	No		Significant ?	No	No	No	No
Source Data
2 h assay						4 h assay
	Eggs in left hosts	Eggs in right hosts	Oviposition index				Eggs in left hosts	Eggs in right hosts	Oviposition index
1-day (left) vs. 1-day (right)	15	18	-0.0909091			1-day (left) vs. 1-day (right)	36	29	0.107692
	17	18	-0.0285714				34	38	-0.0555556
	18	17	0.0285714				34	32	0.030303
	16	18	-0.0588235				32	31	0.015873
	18	16	0.0588235				30	33	-0.047619
1-day (left) vs. 2-day (right)	15	18	-0.0909091			1-day (left) vs. 2-day (right)	31	33	-0.03125
	19	16	0.0857143				29	34	-0.0793651
	16	18	-0.0588235				29	31	-0.0333333
	20	20	0				33	31	0.03125
	19	15	0.117647				34	30	0.0625
1-day (left) vs. 3-day (right)	17	24	-0.170732			1-day (left) vs. 3-day (right)	31	38	-0.101449
	20	18	0.0526316				35	34	0.0144928
	15	16	-0.0322581				34	33	0.0149254
	22	14	0.222222				34	31	0.0461538
	15	19	-0.117647				40	39	0.0126582
1-day (left) vs. 4-day (right)	14	15	-0.0344828			1-day (left) vs. 4-day (right)	29	27	0.0357143
	16	11	0.185185				32	39	-0.0985915
	18	14	0.125				30	34	-0.0625
	11	15	-0.153846				31	28	0.0508475
	16	17	-0.030303				36	40	-0.0526316
