# Supplementary material for: Coordinated molecular and ecological adaptations underlie a highly successful parasitoid
Source: eLife. 2024 Jun 21;13:RP94748. doi: 10.7554/eLife.94748 (PMC11192535; doi:10.7554/eLife.94748)
Supplement: Figure 5—source data 1. [file elife-94748-fig5-data1.xlsx]

## Sheet: Figure 5A
Source Data of Figure 5A
Figure 5A: Parasitism rates in 1- to 4-day-old D. suzukii pupae after monoparasitism or superparasitism by Td
Summary Statistics
Sidak's multiple comparisons test	Mean of monoparasitism	Mean of superparasitism	Mean Diff.	95.00% CI of diff.	Significant?	Summary	P Value
monoparasitism - superparasitism
1-day	0.8367	0.96	-0.1233	-0.1840 to -0.06267	Yes	***	<0.001
2-day	0.82	0.9533	-0.1333	-0.1940 to -0.07267	Yes	***	<0.001
3-day	0.7933	0.92	-0.1267	-0.1873 to -0.06600	Yes	***	<0.001
4-day	0.4367	0.94	-0.5033	-0.5640 to -0.4427	Yes	***	<0.001
Source Data
	monoparasitism						superparasitism
Host	Number of emerged host adults	Number of total hosts	Parasitism rate (%)			Host	Number of emerged host adults	Number of total hosts	Parasitism rate (%)
1-day	10	50	80			1-day	1	50	98
	5	50	90				3	50	94
	7	50	86				2	50	96
	9	50	82				0	50	100
	10	50	80				2	50	96
	8	50	84				4	50	92
2-day	10	50	80			2-day	3	50	94
	9	50	82				4	50	92
	8	50	84				2	50	96
	8	50	84				0	50	100
	9	50	82				2	50	96
	10	50	80				3	50	94
3-day	9	50	82			3-day	4	50	92
	13	50	74				4	50	92
	10	50	80				3	50	94
	10	50	80				7	50	86
	8	50	84				6	50	88
	12	50	76				0	50	100
4-day	26	50	48			4-day	3	50	94
	34	50	32				4	50	92
	25	50	50				2	50	96
	28	50	44				0	50	100
	26	50	48				4	50	92
	30	50	40				5	50	90
