# Supplementary material for: Coordinated molecular and ecological adaptations underlie a highly successful parasitoid
Source: eLife. 2024 Jun 21;13:RP94748. doi: 10.7554/eLife.94748 (PMC11192535; doi:10.7554/eLife.94748)
Supplement: Figure 5—source data 2. [file elife-94748-fig5-data2.xlsx]

## Sheet: Figure 5B
Source Data of Figure 5B
Figure 5B: Wasp emergence rates in 1- to 4-day-old D. suzukii pupae after monoparasitism or superparasitism by Td
Summary Statistics
Sidak's multiple comparisons test	Mean of monoparasitism	Mean of superparasitism	Mean Diff.	95.00% CI of diff.	Significant?	Summary	P Value
monoparasitism - superparasitism
1-day	0.7133	0.7767	-0.06333	-0.1397 to 0.01305	No	ns	0.1386
2-day	0.6833	0.7967	-0.1133	-0.1897 to -0.03695	Yes	**	0.0016
3-day	0.7	0.8267	-0.1267	-0.2030 to -0.05028	Yes	***	<0.001
4-day	0.2267	0.7233	-0.4967	-0.5730 to -0.4203	Yes	***	<0.001
Source Data
	monoparasitism						superparasitism
Host	Number of emerged wasps	Number of total hosts	Wasp emergence rate (%)			Host	Number of emerged wasps	Number of total hosts	Wasp emergence rate (%)
1-day	32	50	64			1-day	37	50	74
	39	50	78				37	50	74
	38	50	76				42	50	84
	32	50	64				40	50	80
	33	50	66				38	50	76
	40	50	80				39	50	78
2-day	30	50	60			2-day	38	50	76
	35	50	70				37	50	74
	36	50	72				40	50	80
	36	50	72				41	50	82
	33	50	66				42	50	84
	35	50	70				41	50	82
3-day	37	50	74			3-day	41	50	82
	34	50	68				42	50	84
	32	50	64				40	50	80
	38	50	76				40	50	80
	35	50	70				42	50	84
	34	50	68				43	50	86
4-day	10	50	20			4-day	39	50	78
	11	50	22				35	50	70
	12	50	24				34	50	68
	18	50	36				37	50	74
	11	50	22				37	50	74
	6	50	12				35	50	70
