# Supplementary material for: Coordinated molecular and ecological adaptations underlie a highly successful parasitoid
Source: eLife. 2024 Jun 21;13:RP94748. doi: 10.7554/eLife.94748 (PMC11192535; doi:10.7554/eLife.94748)
Supplement: Figure 5—source data 3. [file elife-94748-fig5-data3.xlsx]

## Sheet: Figure 5C
Source Data of Figure 5C
Figure 5C: The body length of Td males and females emerged from young and old D. suzukii hosts
Summary Statistics
Body length of Td from young hosts vs.old hosts
Male			Female
Unpaired t test			Unpaired t test
P value	<0.001		P value	<0.001
P value summary	***		P value summary	***
Significantly different?	Yes		Significantly different?	Yes
One- or two-tailed P value?	Two-tailed		One- or two-tailed P value?	Two-tailed
t, df	t=10.66, df=71		t, df	t=13.21, df=71
Source Data
Body length of maleTd (mm)			Body length of femaleTd (mm)
From young hosts	From old hosts		From young hosts	From old hosts
2.03483	1.67903		2.12995	1.70812
1.83216	1.65778		1.97149	1.63274
1.98638	1.687		2.00442	1.58857
1.97921	1.68129		2.00546	1.70404
1.84534	1.6976		2.16087	1.80631
2.10359	1.57254		1.99311	1.72492
1.80527	1.67432		2.02337	1.79667
1.9691	1.70885		2.08683	1.71716
1.90735	1.74675		2.01624	1.74565
1.87468	1.70124		2.07474	1.77162
1.87244	1.62167		2.10645	1.74267
1.88321	1.52021		2.03562	1.77639
1.86926	1.77952		1.99393	1.65113
1.89752	1.58492		1.91072	1.70254
1.9209	1.60124		1.89194	1.67772
1.92587	1.65807		2.04406	1.67674
1.97995	1.72073		2.10079	1.75817
1.97453	1.789		2.16359	1.77165
1.95513	1.8213		2.10442	1.65548
1.94335	1.6223		2.05526	1.76384
1.96027	1.6874		2.04689	1.73242
1.86131	1.7215		1.95832	1.63112
1.99513	1.6593		2.05496	1.67482
1.8138	1.7531		2.07519	1.77415
1.96653	1.7064		1.90947	1.67418
1.96383	1.8117		2.00011	1.81132
1.92032	1.8023		1.993	1.8647
1.90094	1.8873		2.00018	1.8743
2.10865	1.8853		2.09545	1.8923
1.92776	1.8863		2.08076	1.8903
1.87668	1.8805		2.03535	1.9193
1.99867	1.7892		2.06629	1.9794
1.93141	1.7594		1.94107	1.9673
1.90118	1.8723		2.03505	2.0003
1.93141	1.8215		1.98207
1.96879			2.05222
2.02			2.05367
1.91559			2.18405
			2.17708
