# Supplementary material for: Coordinated molecular and ecological adaptations underlie a highly successful parasitoid
Source: eLife. 2024 Jun 21;13:RP94748. doi: 10.7554/eLife.94748 (PMC11192535; doi:10.7554/eLife.94748)
Supplement: Figure 5—source data 5. [file elife-94748-fig5-data5.xlsx]

## Sheet: Figure 5E
Source Data of Figure 5E
Figure 5E: The egg number of Td females emerged from young and old D. suzukii hosts.
Summary Statistics
From young hosts vs. from old hosts
Unpaired t test
P value	<0.001
P value summary	***
Significantly different?	Yes
One- or two-tailed P value?	Two-tailed
t, df	t=15.54, df=61
Source Data
Egg number per female
From young hosts	From old hosts
131	110
127	100
138	98
130	101
124	82
126	102
128	79
116	92
122	84
128	90
127	93
130	96
121	97
114	102
133	100
117	112
128	106
126	104
120	102
124	84
134	78
132	92
131	80
128	90
130	88
122	78
115	80
119	100
128	96
118	94
120
124
117
