# Supplementary material for: Coordinated molecular and ecological adaptations underlie a highly successful parasitoid
Source: eLife. 2024 Jun 21;13:RP94748. doi: 10.7554/eLife.94748 (PMC11192535; doi:10.7554/eLife.94748)
Supplement: Figure 5—source data 6. [file elife-94748-fig5-data6.xlsx]

## Sheet: Figure 5G
Source Data of Figure 5G
Figure 5G: Oviposition indices of Td females in different aged D. suzukii hosts from 2 h and 4 h assays
Summary Statistics
2 h assay						4 h assay
	1-day vs. 1-day	1-day vs. 2-day	1-day vs. 3-day	1-day vs. 4-day			1-day vs. 1-day	1-day vs. 2-day	1-day vs. 3-day	1-day vs. 4-day
Theoretical median	0	0	0	0		Theoretical median	0	0	0	0
Actual median	0.0303	-0.03226	0	0.08108		Actual median	0.02778	-0.02703	0.0137	-0.02778
Number of values	5	5	5	5		Number of values	5	5	5	5
Wilcoxon Signed Rank Test						Wilcoxon Signed Rank Test
Sum of signed ranks (W)	2	-4	-2	5		Sum of signed ranks (W)	-1	-3	-3	-7
Sum of positive ranks	6	3	4	10		Sum of positive ranks	7	6	6	4
Sum of negative ranks	-4	-7	-6	-5		Sum of negative ranks	-8	-9	-9	-11
P value (two tailed)	0.875	0.625	0.875	0.625		P value (two tailed)	>0.9999	0.8125	0.8125	0.375
Exact or estimate?	Exact	Exact	Exact	Exact		Exact or estimate?	Exact	Exact	Exact	Exact
P value summary	ns	ns	ns	ns		P value summary	ns	ns	ns	ns
Significant ?	No	No	No	No		Significant ?	No	No	No	No
Source Data
2 h assay						4 h assay
	Eggs in left hosts	Eggs in right hosts	Oviposition index				Eggs in left hosts	Eggs in right hosts	Oviposition index
1-day (left) vs. 1-day (right)	16	18	-0.0588235			1-day (left) vs. 1-day (right)	33	40	-0.0958904
	19	17	0.0555556				34	32	0.030303
	16	16	0				39	34	0.0684932
	19	17	0.0555556				37	35	0.0277778
	17	16	0.030303				35	39	-0.0540541
1-day (left) vs. 2-day (right)	13	16	-0.103448			1-day (left) vs. 2-day (right)	36	38	-0.027027
	17	19	-0.0555556				37	36	0.0136986
	15	16	-0.0322581				35	38	-0.0410959
	17	17	0				39	32	0.0985915
	17	15	0.0625				33	38	-0.0704225
1-day (left) vs. 3-day (right)	18	19	-0.027027			1-day (left) vs. 3-day (right)	34	38	-0.0555556
	21	20	0.0243902				38	35	0.0410959
	16	19	-0.0857143				30	39	-0.130435
	16	16	0				35	34	0.0144928
	22	19	0.0731707				37	36	0.0136986
1-day (left) vs. 4-day (right)	20	17	0.0810811			1-day (left) vs. 4-day (right)	35	32	0.0447761
	16	17	-0.030303				33	37	-0.0571429
	16	21	-0.135135				35	37	-0.0277778
	21	15	0.166667				35	37	-0.0277778
	17	14	0.0967742				31	33	-0.03125
