# Supplementary material for: Coordinated molecular and ecological adaptations underlie a highly successful parasitoid
Source: eLife. 2024 Jun 21;13:RP94748. doi: 10.7554/eLife.94748 (PMC11192535; doi:10.7554/eLife.94748)
Supplement: Figure 6—source data 1. [file elife-94748-fig6-data1.xlsx]

## Sheet: Figure 6B
Source Data of Figure 6B
Figure 6B: Oviposition rates of Td in non-parasitized host (NH) and Aj-parasitized host pupae (PH) of D. suzukii and D. melanogaster
Summary Statistics
Oviposition rate of NH vs.oviposition rate of PH
D. suzukii			D. melanogaster
P value	0.0022		P value	0.0043
Exact or approximate P value?	Exact		Exact or approximate P value?	Exact
P value summary	**		P value summary	**
Significantly different (P < 0.05)?	Yes		Significantly different (P < 0.05)?	Yes
One- or two-tailed P value?	Two-tailed		One- or two-tailed P value?	Two-tailed
Sum of ranks in column A,B	57 , 21		Sum of ranks in column A,B	45 , 21
Mann-Whitney U	0		Mann-Whitney U	0
Source Data
	D. suzukii					D. melanogaster
	Hosts contain eggs	Total hosts	Oviposition rate (%)			Hosts contain eggs	Total hosts	Oviposition rate (%)
NH	42	42	100		NH	45	48	93.75
	40	46	86.9565			40	46	86.9565
	40	42	95.2381			40	42	95.2381
	30	32	93.75			27	29	93.1034
	29	32	90.625			30	31	96.7742
	27	30	90		PH	1	42	2.38095
PH	0	38	0			0	34	0
	0	32	0			1	31	3.22581
	0	32	0			0	30	0
	0	38	0			1	37	2.7027
	0	34	0			1	41	2.43902
	0	41	0
