# Supplementary material for: Coordinated molecular and ecological adaptations underlie a highly successful parasitoid
Source: eLife. 2024 Jun 21;13:RP94748. doi: 10.7554/eLife.94748 (PMC11192535; doi:10.7554/eLife.94748)
Supplement: Supplementary file 1. [file elife-94748-supp1.xlsx]

## Sheet: Supplementary file 1
Supplementary file 1 Basic features of Trichopria drosophilae genome
Features	Statistics
Sequencing data (PacBio reads)	120.1 Gb
N50 size of all sequenced reads	18,162 bp
Sequencing data (Hi-C Illumina reads)	143.7 Gb
Total size of genome assembly	938,609,777 bp
N50 size of genome assembly	146,929,714 bp
Anchored contigs	0.978
BUSCO complete	0.955
BUSCO partial	0.969
Repeat content	0.521
#Protein-coding genes	16287
