# Supplementary material for: Coordinated molecular and ecological adaptations underlie a highly successful parasitoid
Source: eLife. 2024 Jun 21;13:RP94748. doi: 10.7554/eLife.94748 (PMC11192535; doi:10.7554/eLife.94748)
Supplement: Supplementary file 2. [file elife-94748-supp2.xlsx]

## Sheet: Supplementary file 2
Supplementary file 2 Top 20 expanded gene families in Td
IPR	Annotation	Trichopria drosophilae	Apis mellifera	Athalia rosae	Belonocnema kinseyi	Ceratosolen solmsi	Copidosoma floridanum	Cotesia vestalis	Diachasma alloeum	Diadromus collaris	Leptopilina boulardi	Nasonia vitripennis	Pteromalus puparum	Trichogramma pretiosum	Telenomus remus
IPR001820	Protease inhibitor I35 (TIMP)	29	1	1	1	0	1	2	1	1	2	0	0	1	1
IPR016307	Protease inhibitor with pacifastin repeats	11	0	1	0	1	1	0	2	1	1	1	2	1	1
IPR000812	Transcription factor TFIIB	16	2	2	3	2	2	5	2	1	1	2	2	3	4
IPR000402	Sodium/potassium-transporting ATPase subunit beta	10	3	4	3	4	4	3	4	4	4	4	4	4	4
IPR004316	SWEET sugar transporter	7	2	2	2	2	1	2	2	3	2	2	2	2	2
IPR010684	RNA polymerase II transcription factor SIII, subunit A	6	1	1	1	1	1	1	1	1	1	1	1	1	1
IPR001938	Thaumatin family	3	0	0	0	0	0	0	0	0	2	0	0	0	0
IPR004240	Nonaspanin (TM9SF)	6	3	3	3	3	3	3	4	3	3	3	3	8	2
IPR007808	Transcription elongation factor 1	7	1	1	1	1	1	2	1	1	0	2	2	1	1
IPR008758	Peptidase S28	13	3	3	4	2	2	2	5	3	4	3	2	2	3
IPR012937	Terminal nucleotidyltransferase	4	1	1	1	1	1	1	1	1	1	1	1	1	1
IPR022352	Insulin family	8	2	2	2	1	2	3	1	3	1	2	1	2	2
IPR024206	Gurmarin/antimicrobial peptide	6	0	1	0	0	0	0	0	0	21	0	0	2	0
IPR040052	Splicing factor 45	4	1	1	1	1	1	1	1	1	1	1	1	1	1
IPR034763	Venom allergen 3, insect	6	0	0	1	0	0	0	0	0	0	2	2	1	0
IPR000218	Ribosomal protein L14P	4	2	2	2	2	2	2	3	3	2	2	2	2	2
IPR000422	3,4-dihydroxy-2-butanone 4-phosphate synthase, RibB	2	0	0	0	0	0	0	0	0	0	0	0	1	1
IPR003196	Transcription initiation factor IIF, beta subunit	3	1	1	1	1	0	1	1	1	1	1	1	1	1
IPR004607	Phosphoribosylglycinamide formyltransferase	3	1	1	1	1	1	1	1	2	1	1	1	2	1
IPR005552	Scramblase	7	2	2	1	2	2	0	1	2	1	2	2	1	1
