# Supplementary material for: Coordinated molecular and ecological adaptations underlie a highly successful parasitoid
Source: eLife. 2024 Jun 21;13:RP94748. doi: 10.7554/eLife.94748 (PMC11192535; doi:10.7554/eLife.94748)
Supplement: Supplementary file 3. [file elife-94748-supp3.xlsx]

## Sheet: Supplementary file 3
Supplementary file 3 List of Td venom protein genes
								# Although some genes (TdChr002.026, TdChr003.466) contain the TIMP domain ( IPR001820), they were excluded due to too short or incomplete sequences.
Gene ID	Egg	Lava stage1	Lava stage2	Lava stage3	Pupa stage1	Pupa stage2	Pupa stage3	Female adult	Male adult	Female abdomen	Female antenna	Female head	Female leg	Female thorax	Male abdomen	Male antenna	Male head	Male leg	Male thorax	Ovary	Ovipositor	Teratocyte	Venom	Domain
TdTimp2	0	0	0	0	0	0	13.95	21.85	0	6.09	0	0	3.31	3.01	0	0	0	0	0	0.68	25.95	0	40081.3	IPR001820; Protease inhibitor I35 (TIMP) IPR008993; Tissue inhibitor of metalloproteinases-like, OB-fold IPR027465; Proteinase inhibitor I35b (TIMP), C-terminal
TdTimp1	0	0	0	0	0	1.66	27.61	41.7	1.01	9.09	0.14	0	2.64	2.81	1.38	1.62	11.22	12.18	27.57	1.6	39.11	0	63250.3	IPR001820; Protease inhibitor I35 (TIMP) IPR008993; Tissue inhibitor of metalloproteinases-like, OB-fold IPR027465; Proteinase inhibitor I35b (TIMP), C-terminal
TdChr006.948	441.14	374.67	208.4	180.26	200.39	95.23	152.92	127.98	140.24	111.67	58.24	130.43	123.67	116.44	128.95	95.28	188.54	134.39	127.02	155.58	218.58	33.39	26.72	IPR001748; G10 protein IPR018230; BUD31/G10-related, conserved site
TdChr006.908	329.82	398.11	336.04	257.31	164.7	100.98	194.75	273.64	51.75	228.7	49.89	68.24	60	95.33	93.74	71.56	97.1	54.03	38.16	307.03	75.08	138.79	28.63	IPR008162; Inorganic pyrophosphatase IPR036649; Inorganic pyrophosphatase superfamily
TdChr006.907	685.6	1278.57	2534.81	1476.47	1334.2	977.12	917.3	1149.36	279.72	1458.32	274.66	393.82	501.79	651.55	712.56	387.08	443.68	369.43	301.7	1237.4	743.21	1102.24	24.13	IPR005326; Plectin/S10, N-terminal IPR036388; Winged helix-like DNA-binding domain superfamily
TdChr006.894	59.29	127.33	100.68	108.39	86.61	293.89	284.19	113.9	248.03	132.74	186.36	468.65	966.12	2702.53	252.06	240.7	572.71	1020.43	3676.6	91.71	892.25	44.55	82.2	IPR009947; NADH:ubiquinone oxidoreductase subunit B14.5a
TdChr006.805	320.73	303.52	561.97	359.46	501.25	347.01	655.54	977.23	217.41	1974.39	253.5	577.19	553.47	960	557.98	405.98	636.42	510.71	662.54	1411.3	519.6	153.54	100.55	IPR001841; Zinc finger, RING-type IPR013083; Zinc finger, RING/FYVE/PHD-type IPR024766; Zinc finger, RING-H2-type
TdChr006.803	187.3	321.92	115.44	88.31	92.47	141.71	129.3	83.89	158.77	89.39	240.04	424.55	374	278.17	291.99	327.43	556.93	502.39	477.83	112.81	476.87	19.29	169.43	IPR005772; ATPase, V1 complex, subunit F, eukaryotic IPR008218; ATPase, V1 complex, subunit F IPR036906; ATPase, V1 complex, subunit F superfamily
TdChr006.796	42.92	41.89	21.09	31.2	50.4	34.68	60.31	59.88	70.49	48.92	30.72	38.39	35.84	27.26	77.45	57.86	52.52	36.78	19.81	93.19	47.26	9.38	23.62	IPR001841; Zinc finger, RING-type IPR013083; Zinc finger, RING/FYVE/PHD-type
TdChr006.773	294.88	226.5	122.32	135.68	137.53	59.83	94.15	99.49	101.82	128.93	87.66	84.36	64.53	76.08	137.06	110.62	105.22	70.06	68.89	150.54	96.94	57.04	37.74	IPR029008; Rab5-interacting protein family
TdChr006.746	302.26	244.5	30.13	26.37	61.85	25.24	41.22	50.19	8.56	80.88	10.14	33.12	19.21	35.53	19.81	9.07	25.28	18.13	21.21	97.95	14.3	5.62	17.35	IPR000571; Zinc finger, CCCH-type IPR003604; Matrin/U1-C-like, C2H2-type zinc finger IPR036236; Zinc finger C2H2 superfamily
TdChr006.724	2114.64	2975.8	429.78	282.01	234.68	321.78	391.62	252.95	522.62	272.36	331.21	660.97	740.96	625.77	666.14	567.43	851.75	919.14	947.59	189.67	569.89	159.23	267.81	IPR010625; CHCH
TdChr006.679	1491.33	2391.88	3141.98	1990.31	1827.02	1277.02	1622.32	1993.91	544.34	2750.06	622	848.03	975.73	1384.88	1193.98	834.8	805.14	815.69	573.47	2420.23	1675.29	1550.19	25.51	IPR000235; Ribosomal protein S5/S7 IPR005716; Ribosomal protein S5/S7, eukaryotic/archaeal IPR020606; Ribosomal protein S7, conserved site IPR023798; Ribosomal protein S7 domain IPR036823; Ribosomal protein S7 domain superfamily
TdChr006.666	1228.18	1219.69	2561.77	1550.1	1263.22	1069.35	1347.88	1742.17	302.7	2170.52	224.78	356.84	453	867.06	469.29	298.28	306.9	346.64	229.29	2327.94	644.57	876.4	431.48	IPR001266; Ribosomal protein S19e IPR018277; Ribosomal protein S19e, conserved site IPR036390; Winged helix DNA-binding domain superfamily IPR038111; Ribosomal protein S19e domain superfamily
TdChr006.653	389.99	348.02	540.75	327.18	252.3	130.75	241.91	285.27	72.08	427.38	48.51	147.63	129.1	253.49	114.69	78.6	151.36	94.67	167.96	422.03	152.31	166.55	20.34	IPR000297; Peptidyl-prolyl cis-trans isomerase, PpiC-type IPR001202; WW domain IPR023058; Peptidyl-prolyl cis-trans isomerase, PpiC-type, conserved site IPR036020; WW domain superfamily
TdChr006.642	188.13	255.04	88.5	84.61	51.3	85.14	144.72	110.46	239.73	161.11	76.16	60.94	96.68	90.84	432.52	113.34	61.25	95.74	47.98	159.3	167.87	29.31	51.42	IPR007482; Protein-tyrosine phosphatase-like, PTPLA
TdChr006.641	238.61	420.98	2442.65	1552.03	1081.76	870.5	1208.84	1580.22	260.74	2367.41	334.12	517.1	576.3	1027.12	740.79	454.06	457.41	468.99	375.09	2647.14	974.9	1230.16	92.72	IPR000231; Ribosomal protein L30e IPR004038; Ribosomal protein L7Ae/L30e/S12e/Gadd45 IPR022991; Ribosomal protein L30e, conserved site IPR029064; 50S ribosomal protein L30e-like
TdChr006.632	32.15	58.87	18.43	20.27	29.78	17.98	27.29	30.58	14.42	37.46	12.96	16.24	15.01	26.47	19.19	12.34	18.81	14.87	23.24	47.19	18.95	10.07	19.15	IPR001509; NAD-dependent epimerase/dehydratase IPR028614; GDP-L-fucose synthase/GDP-L-colitose synthase IPR036291; NAD(P)-binding domain superfamily
TdChr006.629	306.68	1041	531.29	440.72	274.46	956.52	554.88	183.81	207.4	299.02	141.45	281.08	547.43	1371.23	326.81	179.26	346.28	588.54	1792.97	214.69	746.29	266.1	69.05	IPR007648; Mitochondrial ATPase inhibitor
TdChr006.628	888.08	1881.15	3463.82	2283.47	1449.51	1083.86	1455.21	1735.82	282.76	2053.65	298.96	442.65	588.51	972.02	575.27	388.06	377.82	420.16	296.07	2651.81	924.69	1961.23	49.34	IPR000196; Ribosomal protein L19/L19e IPR015972; Ribosomal protein L19/L19e, domain 1 IPR023638; Ribosomal protein L19/L19e conserved site IPR033935; Ribosomal protein L19, eukaryotic IPR035970; Ribosomal protein L19/L19e superfamily
TdChr006.617	54.6	43.09	83.6	44.37	70.41	75.53	52.23	82.01	30.58	97.58	56.59	39.87	23.36	46.89	32.02	26.28	33.02	21.14	20.06	94.61	24.6	20.67	23.56	IPR002618; UDPGP family IPR029044; Nucleotide-diphospho-sugar transferases
TdChr006.576	45.01	129.3	223.26	214.75	305.37	328.09	351.21	415.16	145.79	552.79	201.45	227.06	241.82	321	281.62	343.78	351.37	282.8	210.74	759.92	283.55	72.26	34.1	IPR003195; Transcription initiation factor IID, subunit 13 IPR009072; Histone-fold
TdChr006.502	174	220.06	258.29	176.58	169.25	145.73	282.76	209.64	255.55	195.94	161.67	402.69	588.6	880.04	270.35	247.58	417.33	722.09	1312.48	193.87	527.23	34.1	108.25	IPR005746; Thioredoxin IPR013766; Thioredoxin domain IPR036249; Thioredoxin-like superfamily
TdChr006.501	355.65	402.13	289.58	225.7	176.29	72.2	156.79	183.86	89.92	218.37	45.48	74.42	64.4	99.34	116.1	75.06	95.82	63.25	40.67	199.35	92.24	75.73	19.2	IPR000717; Proteasome component (PCI) domain IPR019585; 26S proteasome regulatory subunit Rpn7/COP9 signalosome complex subunit 1 IPR036390; Winged helix DNA-binding domain superfamily
TdChr006.498	74.87	80.62	42.93	51.51	51.81	58.1	65.25	92.42	19.2	137.63	24.76	55.29	30.75	64.04	44.13	38.13	77.89	31.93	16.81	151.15	45.77	17.02	21.52	IPR019330; LRP chaperone MESD
TdChr006.497	7.79	27.98	39.13	16.14	70.25	48.06	56.89	68.56	100.01	14.16	42.54	47.11	6.41	49.99	59.46	45.66	62.27	65.08	86.21	52.76	27.69	0	39.24	IPR022214; Mitotic-spindle organizing protein 1
TdChr006.452	72.26	100.2	63.25	36.4	24.52	48.58	42.74	42.34	10.15	58.5	9.61	16.25	14.36	29.43	11.25	10.48	15.65	11.45	17.29	83.12	17.24	9.06	721.66	IPR001648; Ribosomal protein S18 IPR036870; Ribosomal protein S18 superfamily
TdChr006.424	104.37	88.52	32.01	25.21	30.65	27.77	33.16	41.44	19.33	56.93	18.81	40.04	21.88	28.53	21.74	23.55	33.72	24.28	30.19	74.66	33.68	18.11	36.03	IPR007881; UNC-50
TdChr006.382	440.49	289.15	223.13	102.08	66.64	38.33	142.71	222.29	19.01	221.31	13.04	26.41	30.96	63.66	29.31	33.15	26.23	26.51	16	353.35	45.88	29.08	32.45	IPR021148; Polysaccharide biosynthesis domain IPR023139; PBDC1-like domain superfamily
TdChr006.364	32	121.02	140.02	292.7	124.81	454.72	162.21	56.78	55.02	76.83	29.14	106.07	57.87	44.81	65.25	46.44	121.32	51.86	43.82	64.05	50.27	101.66	51.59	IPR002347; Short-chain dehydrogenase/reductase SDR IPR020904; Short-chain dehydrogenase/reductase, conserved site IPR036291; NAD(P)-binding domain superfamily
TdChr006.338	3365.7	2384.01	1873.61	1087.5	394.71	324.58	741.31	1190.98	58.08	1659.78	95.15	122.06	192.09	617.77	126.05	105.86	111.19	87.16	63.75	1579	122.44	620.68	36.12	IPR001662; Elongation factor 1B gamma, C-terminal IPR004045; Glutathione S-transferase, N-terminal IPR004046; Glutathione S-transferase, C-terminal IPR010987; Glutathione S-transferase, C-terminal-like IPR036249; Thioredoxin-like superfamily IPR036282; Glutathione S-transferase, C-terminal domain superfamily IPR036433; Elongation factor EF1B gamma, C-terminal domain superfamily IPR040079; Glutath…
TdChr006.307	0	0	0	0	0	0.66	18.19	28.75	0	10.09	0.35	0	1.74	2.39	0	0	0	0.45	0.05	1	22.85	0	5220.42	IPR001604; DNA/RNA non-specific endonuclease
TdChr006.260	165.57	319.5	286.98	236.2	437.39	271.45	449.03	262.08	542.06	218.3	286.4	360.4	305.43	270.15	552.42	186.68	254.7	237.7	359.38	177.74	105.65	91.37	65.7	IPR000301; Tetraspanin IPR008952; Tetraspanin, EC2 domain superfamily IPR018499; Tetraspanin/Peripherin
TdChr006.220	900.91	860.14	1802.03	1105.05	1434.22	985.58	1008.93	1221.94	311.19	1634.91	385.08	541.83	718.37	841.24	776.97	462.48	487.57	556.73	396.55	883.01	868.18	958.73	71.58	IPR001865; Ribosomal protein S2 IPR005707; Ribosomal protein S2, eukaryotic/archaeal IPR018130; Ribosomal protein S2, conserved site IPR023591; Ribosomal protein S2, flavodoxin-like domain superfamily IPR027498; Ribosomal protein S2, eukaryotic IPR032281; 40S ribosomal protein SA, C-terminal domain
TdChr006.2173	0	0	0	0	0	0.26	10.92	17.86	0	3.02	0.13	0	0.62	0.81	0	0	0.64	0.38	0.19	1.22	14.1	0	31685	IPR008993; Tissue inhibitor of metalloproteinases-like, OB-fold
TdChr006.2171	0.24	8.75	1.98	54.8	13.75	31.8	62.05	68.98	302.98	19.43	1730.73	389.3	368.94	189.74	299.28	291.59	481.36	368.15	264.1	6.05	550.21	219.1	278.58	IPR001820; Protease inhibitor I35 (TIMP) IPR008993; Tissue inhibitor of metalloproteinases-like, OB-fold IPR027465; Proteinase inhibitor I35b (TIMP), C-terminal
TdChr006.2138	68.94	222.69	145.94	147.64	93.18	340.18	662.51	281.31	582.36	296.92	210.52	858.44	935.6	1289.63	401.01	339.19	1027.39	944.22	1702.16	170.12	798.66	62.35	81.01	IPR001345; Phosphoglycerate/bisphosphoglycerate mutase, active site IPR005952; Phosphoglycerate mutase 1 IPR013078; Histidine phosphatase superfamily, clade-1 IPR029033; Histidine phosphatase superfamily
TdChr006.2119	162.85	96.26	57.07	81.9	31.33	23.01	34.58	34.19	32.59	37.41	26.25	31.76	29.01	32.69	32.44	35.14	37.24	30.5	29.94	49.8	25.39	67.38	27	IPR001451; Hexapeptide repeat IPR005835; Nucleotidyl transferase domain IPR029044; Nucleotide-diphospho-sugar transferases
TdChr006.210	0	0	0	0	0	0	5.43	8.62	0	1.98	0.08	0	0.81	0.18	0	0.13	0	0	0	0.12	4.07	0	2068.89	IPR001818; Peptidase M10, metallopeptidase IPR006026; Peptidase, metallopeptidase IPR018487; Hemopexin-like repeats IPR024079; Metallopeptidase, catalytic domain superfamily IPR036375; Hemopexin-like domain superfamily
TdChr006.2064	95.83	285.71	505.34	481.17	232.17	150.95	270.94	147.24	94.42	137.35	133.81	138.35	164.67	95.59	235.96	201.54	115.16	96.66	60.97	279.74	174.9	232.08	185.83	IPR001310; Histidine triad (HIT) protein IPR011146; HIT-like domain IPR019808; Histidine triad, conserved site IPR036265; HIT-like superfamily
TdChr006.2061	18.01	1296.16	137.39	469.02	164.56	639.82	1332.06	116.31	813.81	15.65	90.78	525.82	3238.86	668.57	370.57	112.07	544.78	2009.49	771.84	7.79	4607.01	0.09	20.31	IPR000533; Tropomyosin
TdChr006.2052	57.18	121.23	35.6	54.29	64.66	48.41	61.64	42.78	144.1	39.8	37.11	39.57	31.28	34.13	310.14	51.46	55.42	33.47	25.07	43.7	94.79	1459.43	21.09	IPR009288; Gamma-glutamylcyclotransferase, AIG2-like IPR013024; Gamma-glutamyl cyclotransferase-like IPR036568; Gamma-glutamyl cyclotransferase-like superfamily
TdChr006.205	15.3	27.09	15.58	12.44	25.66	14.03	23.12	18.47	28.38	27.94	14.2	37.67	31.06	19.35	22.54	24.07	32.59	35.37	30.69	30.15	64.03	5.47	29.13	IPR006722; Trafficking protein particle complex subunit 2 IPR011012; Longin-like domain superfamily
TdChr006.2045	80.88	122.87	61.76	49.34	61.07	39.28	54.14	58.46	32.77	48.36	25.31	43.89	42.51	54.88	50.9	42.92	50.67	67.1	43.89	74.03	74.28	21.96	23.11	IPR002744; MIP18 family-like IPR034904; Fe-S cluster assembly domain superfamily
TdChr006.2036	312.49	168.58	106.11	96.56	33.04	43.53	66.17	54.1	45.71	71.36	58.69	80.86	66.62	63.72	76.95	123.62	90.33	74.5	46.56	74.9	50.45	170.47	62.6	IPR006603; PQ-loop repeat IPR016817; Mannose-P-dolichol utilization defect 1 protein
TdChr006.200	666.73	1025.14	9455.55	6060.56	4406.46	2224.04	4223.28	5664.49	1102.91	4998.58	667.1	1188.78	1221.26	2057.75	1717.33	1000.33	1093.05	972.56	719.76	8733.75	2146.76	2740.87	302.17	IPR002784; Ribosomal protein L14e domain IPR008991; Translation protein SH3-like domain superfamily IPR014722; Ribosomal protein L2, domain 2 IPR041985; Ribosomal protein L14, KOW motif
TdChr006.1955	1.75	30.05	3.48	5.7	2.58	20.37	24.87	4.61	12.86	1.54	0.36	6.94	8.49	85.07	14.5	0.49	12.25	13.56	195.99	0.6	88.85	0.04	41.86	IPR001810; F-box domain IPR032675; Leucine-rich repeat domain superfamily IPR036047; F-box-like domain superfamily
TdChr006.1952	2286.19	1179.2	2612.85	1252.87	811.33	523	2254.47	3312.86	54.59	3421.09	93.11	168.8	306.31	1159.17	108.95	105.82	123.26	118.01	54.64	4860.43	200.59	240.92	76.89	IPR024057; Nucleoplasmin core domain IPR036824; Nucleoplasmin core domain superfamily
TdChr006.1850	3220.1	4131.14	2943.99	1753.1	1246.08	932.03	1427.67	1498.67	243.84	1715.55	259.42	402.29	661.4	838.17	682.03	349.34	391.06	450.71	334.34	1512.15	950.03	1182.15	509.65	IPR001790; Ribosomal protein L10P IPR030670; 60S acidic ribosomal protein P0 IPR040637; 60S ribosomal protein L10P, insertion domain
TdChr006.1824	166.33	77.77	252.87	228.45	98.87	102.15	349.56	488.97	79.44	541.69	74.13	110.26	91.05	199.77	148.54	159.48	158.7	121.05	62.94	625.68	115.4	118.2	165.79	IPR016093; MIR motif IPR036300; Mir domain superfamily
TdChr006.1810	649.54	803.98	360.57	346.6	200.67	421.45	999.02	377.5	660.3	199.65	173.44	299.85	396.6	1248.19	220.74	195.93	371.82	464.48	1765.25	343.35	928.96	150.86	282.51	IPR003197; Cytochrome b-c1 complex subunit 7 IPR036544; Cytochrome b-c1 complex subunit 7 superfamily
TdChr006.1794	154.47	161.53	43.35	37.48	43.83	42.06	49.42	55.55	52.91	62.26	84.66	96.94	73.32	86.24	77.14	114.95	101.74	90.89	95.9	77.77	129.11	33.56	99.81	IPR010432; RDD
TdChr006.1773	289.41	275.47	126.05	137.45	114.56	136.53	169.3	129.62	215.3	126.19	163.91	318.68	224.92	196.19	185.02	193.67	322.48	244.7	224.93	122.88	276.91	32.83	19.37	IPR002699; ATPase, V1 complex, subunit D
TdChr006.1748	0	0	0	0	0	0	6.63	8.67	0	1.19	0.05	0	0.25	0.4	0	0	0	0	0	0.15	2.94	0	3900.34	IPR038602; Mite allergen, group-7 superfamily
TdChr006.1747	0.12	0.07	0	0	0	0	1.87	3.08	0.14	0.98	0.03	0.12	0.13	0.57	0.25	0.03	0.14	0.25	0.04	0.25	2.26	0	634.76	IPR005312; Protein of unknown function DUF1759
TdChr006.1698	0.16	0	0	0.09	0	0.31	3.9	4.67	0	0.96	0	0	0.38	0.37	0	0	0	0	0	0.31	2.56	0.04	1614.72	IPR000585; Hemopexin-like domain IPR001818; Peptidase M10, metallopeptidase IPR006026; Peptidase, metallopeptidase IPR018487; Hemopexin-like repeats IPR021190; Peptidase M10A IPR024079; Metallopeptidase, catalytic domain superfamily IPR033739; Peptidase M10A, catalytic domain IPR036375; Hemopexin-like domain superfamily
TdChr006.1692	417.56	327.13	176.29	146.61	323.53	255.4	254.02	257.88	248.22	255.83	190.34	387.69	313.24	307	321.39	213.13	404.64	352.5	630.76	270.86	193.75	39	209.82	IPR001806; Small GTPase IPR005225; Small GTP-binding protein domain IPR027417; P-loop containing nucleoside triphosphate hydrolase
TdChr006.1682	50.95	129.58	71.7	48.45	42.62	33.95	42.29	55.88	29.61	47.79	13.62	26.23	16.57	23.92	24.05	20.88	34.6	21.49	17.05	75.13	59.52	15.72	21.54	IPR002777; Prefoldin beta-like IPR009053; Prefoldin
TdChr006.1675	191.95	351.32	270.38	172.18	80.56	123.07	162.13	128.97	96.91	159.74	49.69	114.06	65.3	52.39	98.39	64.69	77.21	64.47	95.81	92.13	123.56	59.54	69.79	IPR001911; Ribosomal protein S21
TdChr006.1661	123.11	85.62	41.51	55.42	75	38.37	58.55	64.68	95.23	68.47	74.47	197.97	100.9	87.83	170.14	127.38	281.18	124.99	109.28	72.73	185.11	27.56	24.4	IPR000008; C2 domain IPR003892; Ubiquitin system component CUE IPR009060; UBA-like superfamily IPR035892; C2 domain superfamily IPR037301; Toll-interacting protein, C2 domain IPR041799; Toll-interacting protein, CUE domain
TdChr006.1621	0	0	0	0	0	0	18.91	33.54	0	8.1	0.16	0	2.7	3.74	0	0	0	0.45	0.11	0.74	26.68	0	10329.2	IPR001604; DNA/RNA non-specific endonuclease
TdChr006.1595	0	0	0	0	0	0.23	10.14	18	0	4.13	0.06	0	0.57	0.18	0	0	0	0	0	0.47	9.63	0	636.69	IPR001604; DNA/RNA non-specific endonuclease
TdChr006.1594	0	0	0	0.03	0	0	1.54	1.41	0	0.47	0	0	0.06	0.22	0	0	0	0	0	0	0.27	0	23.6	IPR001604; DNA/RNA non-specific endonuclease
TdChr006.1591	0	0	0	0	0	0.8	22.89	31.77	0	8.35	0.14	0	1.52	1.85	0.04	0	0	0.46	0	0.8	18.32	0	9651.43	IPR001604; DNA/RNA non-specific endonuclease
TdChr006.154	792.46	500.28	530.14	543.03	298.68	143.33	227.53	224.05	166.53	259.08	124.63	123.77	177.8	184.5	188.41	175.23	168.2	173.71	141.63	221.69	118.18	307.61	134.58	IPR005225; Small GTP-binding protein domain IPR006689; Small GTPase superfamily, ARF/SAR type IPR027417; P-loop containing nucleoside triphosphate hydrolase
TdChr006.1516	602.26	463.46	346.87	228.35	124	98.22	187.89	244.62	54.6	279.27	65.81	104.9	84.97	132.37	79.28	79.29	98.26	68.47	62.16	288.79	104.75	96.19	39.46	IPR000717; Proteasome component (PCI) domain IPR016650; Eukaryotic translation initiation factor 3 subunit E IPR019010; Eukaryotic translation initiation factor 3 subunit E, N-terminal IPR036390; Winged helix DNA-binding domain superfamily
TdChr006.1444	51.91	65.59	70.73	78.57	77.32	69.08	163.75	154.05	102.53	142.57	47	145.45	78.15	105.69	30.33	40.58	59.32	56.97	99.41	167.13	24.73	28.23	23.72	IPR002048; EF-hand domain IPR011992; EF-hand domain pair IPR018247; EF-Hand 1, calcium-binding site
TdChr006.1420	142.34	175.52	26.42	43.15	35.63	78.07	21.65	8.71	16.61	32.8	48.07	65.87	100.76	62.86	126.93	41.63	119.48	73.04	87.82	15.28	42.61	7.87	148.97	IPR024135; Ragulator complex protein LAMTOR5
TdChr006.1330	131.15	105.35	65.07	49.86	68.75	52.16	76.27	101.85	26.65	120.93	25.49	34.89	43.72	69.84	36.52	35.3	48.77	40.67	40.83	175.44	48.8	27.1	38.14	IPR004394; Protein Iojap/ribosomal silencing factor RsfS
TdChr006.1329	136.67	390.2	369.91	334.9	217.03	272.26	150.15	106.12	128.22	215.16	133.81	173.96	125.03	147.42	158.58	143.85	148.38	123.3	163.4	76.66	112.79	173.11	324.01	IPR018450; Romo1/Mgr2
TdChr006.1317	426.48	441.99	426.19	276.9	174.22	140.95	211.99	247.7	92.55	345.11	98.87	153.35	150.41	200.12	160.49	120.62	167.18	159.97	133.31	305.58	184.64	131.74	16.96	IPR000555; JAB1/MPN/MOV34 metalloenzyme domain IPR024969; Rpn11/EIF3F, C-terminal IPR027531; Eukaryotic translation initiation factor 3 subunit F IPR037518; MPN domain
TdChr006.1208	317.08	333.01	126.72	107.89	113.8	98.8	125.88	163.23	49.83	204.09	42.45	95.11	86.43	139.66	53.75	57.3	90.63	80.02	81.41	310.41	128.03	44.56	28.02	IPR001680; WD40 repeat IPR015943; WD40/YVTN repeat-like-containing domain superfamily IPR017986; WD40-repeat-containing domain IPR036322; WD40-repeat-containing domain superfamily
TdChr006.1202	336.62	324.23	120.29	125.24	156.06	152.89	159.23	152.66	87.15	157.99	72.76	108.87	102.8	114.79	89.4	85.48	122.84	107.61	78.79	208.84	120.6	64.11	61.73	IPR000589; Ribosomal protein S15 IPR009068; S15/NS1, RNA-binding
TdChr006.1199	391.93	364.69	250.24	291.62	256	253.48	469.78	325.19	824.79	245.71	499.55	863.26	722.96	644.24	595.78	605.12	938.26	704.24	1008.09	287.75	628.76	99	68.43	IPR000194; ATPase, F1/V1/A1 complex, alpha/beta subunit, nucleotide-binding domain IPR004100; ATPase, F1/V1/A1 complex, alpha/beta subunit, N-terminal domain IPR005723; ATPase, V1 complex, subunit B IPR020003; ATPase, alpha/beta subunit, nucleotide-binding domain, active site IPR022879; V-type ATP synthase regulatory subunit B/beta IPR027417; P-loop containing nucleoside triphosphate hydrolase
TdChr006.1198	268.92	370.25	347.62	250.13	236.21	350.79	236.21	207.24	134.59	200.49	142.3	425.87	164.41	147.69	187.7	169.97	366.84	319.16	193.22	263.46	301.63	27.24	322.89	IPR007513; Uncharacterised protein family SERF, N-terminal IPR026939; ZNF706/At2g23090 superfamily
TdChr006.1110	102.58	138.44	36.56	31.01	53	36.15	40.27	40.78	14.78	59.81	25.86	39.24	28.41	98.99	21.03	30.68	36.51	29.71	148.39	65.55	93.84	6.22	17.17	IPR017920; COMM domain IPR037354; COMM domain-containing protein 2
TdChr006.1017	1268.96	776.88	455.52	346.78	199.93	160.91	473.01	637.23	112.67	735.28	79.27	159.98	226.16	412.09	132.3	115.49	169.16	169.89	161.5	1002.89	217.32	168.81	32.23	IPR019380; Casein kinase substrate, phosphoprotein PP28
TdChr006.050	148	491.05	526.2	1167.42	266.34	139.44	197.63	125.71	627.38	102.28	862.12	328.25	680.98	260.68	1283.61	1611.8	308.77	768.91	313.65	48.3	616.94	416.3	442.47	IPR001129; Membrane-associated, eicosanoid/glutathione metabolism (MAPEG) protein IPR023352; Membrane associated eicosanoid/glutathione metabolism-like domain superfamily
TdChr006.042	385.63	442.58	144.17	97.81	77.55	158.9	221.2	94.56	79.06	85.34	33.17	48.7	53.34	76.93	46.02	30.16	74.38	60.01	74.45	112.82	93.82	49.46	48.98	IPR019377; NADH-ubiquinone oxidoreductase, subunit 10
TdChr006.022	56	131.12	226.04	174.2	182.23	182.89	107.08	95.44	39.52	102.22	36.05	105.37	61.33	88.69	82.19	37.41	135.53	56.9	56.29	150.45	85.25	28.25	23.62	IPR002777; Prefoldin beta-like IPR009053; Prefoldin IPR016661; Prefoldin, subunit 4
TdChr006.006	1252.86	1201.81	2914.84	2174.66	2224.66	192.83	459.75	779.79	91.28	1094.97	115.72	476.54	240.76	482.44	158.56	166.02	402.12	177.19	294.48	804.86	274.6	26.29	24.78	IPR017956; AT hook, DNA-binding motif
TdChr006.002	0	0.4	0.15	37.31	27.62	1.59	8.37	8.01	43.84	0.95	0.16	28.78	4.73	47.13	24.38	0.1	14.72	3.75	79.86	0.12	1.46	71.7	28.82	IPR000917; Sulfatase, N-terminal IPR017850; Alkaline-phosphatase-like, core domain superfamily IPR024607; Sulfatase, conserved site
TdChr005.917	260.84	395.9	231.47	170.75	169.09	117.94	140.54	147.99	76.14	195.5	61.12	133.47	96.15	125.7	70.2	87.03	133.42	89.98	85.37	314.08	129.33	113.92	91.05	IPR025602; BCP1 family
TdChr005.909	281.48	441.96	105	61.35	46.46	53.41	61.55	75.29	15.89	93.64	19.19	32.44	29.89	54.22	33.48	21.93	32.25	26.43	23.33	128.55	60.99	39.06	37.36	IPR004274; FCP1 homology domain IPR023214; HAD superfamily IPR036412; HAD-like superfamily
TdChr005.860	197.55	265.45	149.86	143.51	177.44	89.93	190	167.93	133.36	222.49	40.03	138.98	82.18	105.21	62.74	77.37	183.5	100.83	95.11	286.63	106.87	32.35	30.65	IPR011107; Type 1 protein phosphatase inhibitor
TdChr005.858	447.18	537.36	291.69	335.72	1062.24	402.09	888.72	1241.01	1018.62	1229.44	499.07	766.03	471.06	679.43	993.02	678.81	859.36	515.11	794.98	1019.5	498.85	494.44	43.46	IPR000626; Ubiquitin-like domain IPR019954; Ubiquitin conserved site IPR019956; Ubiquitin domain IPR029071; Ubiquitin-like domain superfamily
TdChr005.845	40.13	65.43	25.9	23.19	51.37	36.85	54.74	55.23	61.56	60.7	42.47	104.63	100.51	160.12	67.2	55.23	117.89	125.4	204.18	80.8	176.7	7.22	36.08	IPR033393; Nuclear receptor-binding factor 2, MIT domain
TdChr005.835	166.26	220.47	88.67	60.48	47.07	85.83	86.26	70.57	17.7	59.29	23.07	42.9	32.15	55.84	29.11	25.14	28.09	38.39	39.98	147.77	95.89	24.41	55.67	IPR007741; Ribosomal protein/NADH dehydrogenase domain IPR036249; Thioredoxin-like superfamily
TdChr005.814	0	0	0	0	0	0	8.05	13.21	0.76	3.88	0.12	0.25	1.11	3.43	0.44	0	0.96	0	5.16	0.6	4.99	0	22580.8	IPR000734; Triacylglycerol lipase family IPR013818; Lipase/vitellogenin IPR029058; Alpha/Beta hydrolase fold
TdChr005.813	0.42	0.69	0	0	0	0	8.3	12.95	2.63	3.4	7.11	0.91	3.96	5.26	4.82	0	0.81	1.13	5.01	0.28	9.74	0	9631.51	IPR000734; Triacylglycerol lipase family IPR013818; Lipase/vitellogenin IPR029058; Alpha/Beta hydrolase fold
TdChr005.804	1509.38	651.9	765.44	817.47	248.22	116.2	247.12	363.65	38.9	429.94	51.18	45	61.99	150.28	50.1	49.06	48.54	40.72	44.88	495.34	49.42	481.51	67.04	IPR005595; Translocon-associated protein (TRAP), alpha subunit
TdChr005.787	812.77	1510.72	3777.95	2266.55	1774.03	1509.11	1522.94	1544.29	463.94	2120.53	472.96	787.91	951.57	1102.72	1129.83	678.3	770.99	683.18	520.73	2706.21	1522.19	1641.81	404.79	IPR000509; Ribosomal protein L36e IPR038097; Ribosomal protein L36e domain superfamily
TdChr005.768	143.58	383.96	151.26	125.13	84.84	216	219.86	67.21	108.42	56.16	58.11	109.73	124.33	95.84	111.05	78.97	154.43	112.61	122.47	86.76	156.36	59.84	80.84	IPR006806; NADH dehydrogenase [ubiquinone] 1 alpha subcomplex subunit 5
TdChr005.717	384.72	171.83	79.64	153.55	95.9	85.2	105.77	98.44	103.69	105.14	100.61	165.13	119.41	105.43	141.91	145.42	176.64	136.89	112.26	119.45	129.76	68.97	374.44	IPR009011; Mannose-6-phosphate receptor binding domain superfamily IPR012913; Protein OS9-like
TdChr005.714	17.48	70.8	9.23	12.56	30.98	33.71	12.96	10.4	23.58	15.8	39.23	63.12	40.25	31.58	34.53	64.45	73.99	53.05	45.98	9.89	64.61	3.44	18.47	IPR029302; Intraflagellar transport protein 43
TdChr005.712	73.77	132.75	54.39	53.49	68.54	24.07	42.43	62.85	27.41	70.58	21.61	55.74	25.83	46.07	35.2	31.01	53.18	22.2	41.2	110.71	37.91	52.7	2536.55	IPR003377; Cornichon
TdChr005.694	522.75	1050.23	2622.53	1432.64	835.52	693.28	983.7	1207.06	182.15	1713.87	259.88	403.48	465.44	800.83	551.53	325.76	340.52	313.68	226.36	1910.26	720.45	992.14	633.33	IPR002143; Ribosomal protein L1 IPR016095; Ribosomal protein L1, 3-layer alpha/beta-sandwich IPR023674; Ribosomal protein L1-like IPR028364; Ribosomal protein L1/ribosomal biogenesis protein
TdChr005.672	19.15	160	319.61	843.9	661.38	299.63	1029.64	673.67	440.73	278.59	459.3	713.12	580.31	358.94	738.3	687.16	567.35	483.1	440.57	328.55	413.7	399.4	836	IPR024130; DAP1/DAPL1
TdChr005.668	733.84	798.89	324.94	274.35	259.45	388.39	622.51	280.5	323.38	241.34	61.54	191.73	229.74	204.52	130.83	159.19	227.89	268.44	236.55	303.96	582.45	107.85	241.87	IPR026627; NADH dehydrogenase [ubiquinone] 1 beta subcomplex subunit 2
TdChr005.654	480.43	397	479.03	329.26	302.65	176.12	314.68	359.85	202.84	408.98	124.02	165.13	155.74	201.19	334.71	199.81	212.01	148.41	107.34	368.45	195.31	127.66	28.02	IPR000243; Peptidase T1A, proteasome beta-subunit IPR001353; Proteasome, subunit alpha/beta IPR016050; Proteasome beta-type subunit, conserved site IPR023333; Proteasome B-type subunit IPR029055; Nucleophile aminohydrolases, N-terminal
TdChr005.643	32.8	33.73	31.09	53.86	27.93	11.17	23.6	19.4	20.79	18.74	16.74	14.11	10.22	14.41	14.25	23.2	17.54	16.79	9.2	36.38	19.09	39.54	29.5	IPR027027; GOSR2/Membrin/Bos1
TdChr005.598	32.98	81.5	37.36	24.16	26.82	15.65	36.26	50.57	9.34	53.43	11.66	19.01	14.9	30.46	26.71	15.55	16.86	11.02	7.65	80.88	50.89	9.52	20.24	IPR028945; WRB/Get1 family
TdChr005.586	409.68	434.69	269.16	185.01	198.19	115.67	180.13	189.98	111.12	244.01	105.5	175.11	135.59	155.24	201.12	157.57	204.08	129.96	95.85	236.84	132.14	60.4	23.16	IPR003593; AAA+ ATPase domain IPR003959; ATPase, AAA-type, core IPR003960; ATPase, AAA-type, conserved site IPR005937; 26S proteasome regulatory subunit P45-like IPR027417; P-loop containing nucleoside triphosphate hydrolase IPR041569; AAA ATPase, AAA+ lid domain
TdChr005.543	731.45	549.95	484.74	326.96	179.07	213.04	520.34	746.85	87.97	845.32	72.63	78.26	126.8	355.05	109.87	87.29	96.36	84.23	80.07	804.91	130.72	216.77	94.03	IPR001040; Translation Initiation factor eIF- 4e IPR019770; Eukaryotic translation initiation factor 4E (eIF-4E), conserved site IPR023398; Translation Initiation factor eIF- 4e-like
TdChr005.524	1917.02	2705.78	4161.52	2839.1	1786.42	1374.52	1874.9	2266.66	476.3	2857.22	703.18	932.47	1162.46	1545.83	1260.46	982.65	841.72	882.01	620.37	4284.95	1853.35	1956.81	634.92	IPR000915; 60S ribosomal protein L6E IPR005568; Ribosomal protein L6, N-terminal IPR008991; Translation protein SH3-like domain superfamily IPR014722; Ribosomal protein L2, domain 2 IPR041997; Ribosomal Protein L6, KOW domain
TdChr005.523	352.75	331.02	135.22	70.88	57.77	45.52	103.77	126.98	23.01	138.25	23.86	40.23	43.04	56.21	39.08	28.03	47.15	48.89	28.05	232.86	85.04	29.04	44.63	IPR007146; Sas10/Utp3/C1D
TdChr005.501	763.98	313.24	25.16	26.74	34.64	23.16	282.32	478.21	44.6	839.36	36.47	90.04	94.85	315.85	39.91	64.04	84.5	73.63	65.52	1097.98	51.66	76.11	83.03	IPR004827; Basic-leucine zipper domain
TdChr005.478	6.03	539.98	209.87	452.79	357.57	816.9	530.09	220.58	1609.86	20.77	22.98	1370.23	3329.24	899.36	575.38	29.9	1541.29	2746.01	1084.22	10.73	2401.23	0.75	138.48	IPR002048; EF-hand domain IPR011992; EF-hand domain pair IPR018247; EF-Hand 1, calcium-binding site
TdChr005.405	60.11	117.33	6.1	30.54	392.1	62.37	148.36	106.49	209.9	46.59	5.9	722.92	113.99	317.56	575.97	6.59	938.77	73.46	423.28	50.41	4740.11	242.48	42.63	IPR001007; VWFC domain
TdChr005.391	252.62	462.47	886.88	428.3	300.08	195.42	210.19	250.26	60.87	289.3	63.04	110.49	113.13	147.98	178.51	101.85	114.71	113.58	69.71	398.16	249.36	291.39	22.91	IPR001063; Ribosomal protein L22/L17 IPR005721; Ribosomal protein L22/L17, eukaryotic/archaeal IPR018260; Ribosomal protein L22/L17, conserved site IPR036394; Ribosomal protein L22/L17 superfamily
TdChr005.354	167.02	142.38	70.6	66.43	113.28	66.75	95.38	102.7	106.35	93.92	59.31	200.26	153.04	110.7	100.62	104.11	177.25	182.42	142.41	141.99	286.36	24.98	30.17	IPR007143; Vacuolar protein sorting-associated Vps28 IPR017898; Vacuolar protein sorting-associated, VPS28, N-terminal IPR017899; Vacuolar protein sorting-associated, VPS28, C-terminal IPR037202; ESCRT assembly domain IPR037206; VPS28, C-terminal domain superfamily IPR038358; VPS28, N-terminal domain superfamily
TdChr005.323	0	0	0	0	0	0	0.76	0.91	0.03	0.05	0	0	0	0	0.2	0	0	0.05	0	0.06	0.41	0	75.56	IPR000718; Peptidase M13 IPR008753; Peptidase M13, N-terminal domain IPR018497; Peptidase M13, C-terminal domain IPR024079; Metallopeptidase, catalytic domain superfamily IPR042089; Peptidase M13, domain 2
TdChr005.322	146.33	98.56	34.34	24.99	7.78	20.2	72.92	50.38	279.19	20.63	196.53	186.76	434.67	131.42	271.84	185.87	169.22	428.49	165.17	23.27	112.86	0.53	226.34	IPR029033; Histidine phosphatase superfamily
TdChr005.309	91.18	67.11	51.95	37.91	9.63	37.55	62.96	65.1	18.14	69.77	11.53	11.43	25.84	18.71	16.4	10.48	19.15	13.98	6.89	69.25	10.95	11.53	26.78	IPR012875; Succinate dehydrogenase assembly factor 4
TdChr005.230	597.05	394.51	656.32	732.22	237.46	142.13	205.19	336.21	44.1	466.81	69.67	64.02	75.8	146.9	77.24	68.24	79.52	59.7	37.93	525.65	58.82	666.23	673.09	IPR008856; Translocon-associated protein subunit beta
TdChr005.2214	1152.29	1666.6	3353.68	2287.54	1739.94	1203.65	1513.23	1707.64	487.12	1857.26	489.81	768.86	811	1056.55	1152.1	694.21	759.58	642.92	514.05	2631.73	1611.64	1518.81	202.62	IPR001380; Ribosomal protein L13e IPR018256; Ribosomal protein L13e, conserved site
TdChr005.2206	100.23	173.84	34.42	116.96	61.06	125.23	75.34	46.65	82.29	45.74	84.1	97.05	61.04	64.86	119.36	205.01	100.9	71.28	83.44	41.4	405.78	18.2	1123.83	IPR004911; Gamma interferon inducible lysosomal thiol reductase GILT
TdChr005.2174	37.61	47.77	33.71	53.29	108.71	97.37	43.26	31.01	61.73	35.69	87.8	171.91	130.41	68.46	145.32	158.69	204.08	149.28	109.36	18.4	110.11	9.44	21.14	IPR007919; Uncharacterised protein family UPF0220
TdChr005.2163	36.61	119.88	25.2	53.49	408.89	151.48	82.02	68.23	203.52	63.52	97.9	343.85	175.57	148.42	284.61	117.95	356.51	201.05	437.31	32.52	204.31	46.82	71.26	IPR010548; BNIP3
TdChr005.2079	395.79	268.77	345.44	243.51	130	148.98	232.47	303.05	76.59	401.7	56.64	105.29	135.5	214.37	117.1	86.29	145.21	131.08	148.32	327.67	115.66	107.04	34.23	IPR013906; Eukaryotic translation initiation factor 3 subunit J IPR023194; Eukaryotic translation initiation factor 3-like domain superfamily
TdChr005.2068	9.19	5.82	3.83	14.21	10.37	31.32	61.78	55.39	57.82	41.22	72.52	70.69	24.19	35.87	45.57	31.16	104.44	27.94	54.27	47.8	13.8	21.96	49.13	IPR015883; Glycoside hydrolase family 20, catalytic domain IPR017853; Glycoside hydrolase superfamily IPR025705; Beta-hexosaminidase IPR029018; Beta-hexosaminidase-like, domain 2 IPR029019; Beta-hexosaminidase, eukaryotic type, N-terminal
TdChr005.2067	142.61	422.54	34.08	60.11	90.3	61.44	71.97	42.56	207.93	14.55	113.72	83.8	161.47	101.11	201.25	141.94	57.58	151.22	115.77	13.29	51.14	9.75	28.83	IPR029304; A-kinase anchor protein 2, C-terminal domain
TdChr005.2024	8.02	8.4	3.74	8.05	5.25	6.11	19.29	13.16	61.71	5.07	35.57	38.72	22.53	37.92	48.35	28.07	30.16	18.65	39.2	5.95	15.18	21.88	24.45	IPR004316; SWEET sugar transporter
TdChr005.2023	325.97	782.16	4660.68	2955.55	2438.08	2331.2	2207.92	2503.86	582.33	3821.6	712.32	949.79	1215.34	1898.36	1313.23	920.51	856.78	910.45	628.11	4654.82	1896.52	2266.03	234.38	IPR002222; Ribosomal protein S19/S15 IPR005713; Ribosomal protein S19A/S15e IPR020934; Ribosomal protein S19 conserved site IPR023575; Ribosomal protein S19, superfamily
TdChr005.202	1719.88	2694.91	4252.46	2603.48	2347.94	1133.93	1794.68	2118.83	541.32	2011.59	402.62	633.07	671.08	957.65	958.82	571.06	553.43	587.92	420.95	2261.39	1272.09	1305.7	1723.57	IPR000626; Ubiquitin-like domain IPR002906; Ribosomal protein S27a IPR011332; Zinc-binding ribosomal protein IPR019954; Ubiquitin conserved site IPR019956; Ubiquitin domain IPR029071; Ubiquitin-like domain superfamily IPR038582; S27a-like superfamily
TdChr005.2013	29.58	71.39	20.07	23.14	85.06	32.73	24.25	27.71	27.6	34.93	16.24	26.71	16.78	23.27	62.05	22.06	25.08	19.97	20.85	35.46	15.58	6.04	16.87	IPR015865; Riboflavin kinase domain, bacterial/eukaryotic IPR023465; Riboflavin kinase domain superfamily
TdChr005.1987	0.29	2.96	0.19	0.37	0.38	0.27	4.12	6.16	0.68	0.51	68.43	0.22	0.25	0.43	1.68	0.02	0	0.03	0	0.15	1.26	0	29.76	IPR001320; Ionotropic glutamate receptor IPR019594; Ionotropic glutamate receptor, L-glutamate and glycine-binding domain
TdChr005.1972	112.36	94.63	66.22	60.41	85.38	112.44	115.35	96.83	94.7	115.16	40.36	145.23	85.24	101.62	59.1	71.58	165.2	115.02	129.19	140.49	146.96	23.01	29.9	IPR001478; PDZ domain IPR004172; L27 domain IPR014775; L27 domain, C-terminal IPR017365; Protein lin-7 IPR036034; PDZ superfamily IPR036892; L27 domain superfamily
TdChr005.196	339.13	517.78	2904.51	1892.33	1581.31	1235.58	1644.05	2090.34	388.86	2485.39	487.67	676.75	994.12	1241.28	1086.8	639.54	698	734.7	529.14	1530.28	1304.08	2042.45	35.22	IPR002171; Ribosomal protein L2 IPR008991; Translation protein SH3-like domain superfamily IPR012340; Nucleic acid-binding, OB-fold IPR014722; Ribosomal protein L2, domain 2 IPR014726; Ribosomal protein L2, domain 3 IPR022666; Ribosomal Proteins L2, RNA binding domain IPR022669; Ribosomal protein L2, C-terminal IPR022671; Ribosomal protein L2, conserved site
TdChr005.1867	774.82	864.81	364.52	216.28	195.97	125.66	201.9	211	143.68	301.84	93.13	108.3	112.3	143.12	219.34	160.35	147.89	129.46	99.56	238.39	173.09	93.18	21.21	IPR001353; Proteasome, subunit alpha/beta IPR016050; Proteasome beta-type subunit, conserved site IPR023333; Proteasome B-type subunit IPR029055; Nucleophile aminohydrolases, N-terminal IPR035206; Proteasome subunit beta 2
TdChr005.1864	329.8	314.37	236.74	192.02	539.27	225.23	422.57	370.8	213.32	353.05	39.48	192.42	101.15	153.45	114.76	71.38	203.66	87.41	104.25	431.09	110.58	42.59	42.64	IPR002048; EF-hand domain IPR011992; EF-hand domain pair IPR018247; EF-Hand 1, calcium-binding site
TdChr005.1834	479.74	171.24	36.04	80.89	89.85	38.08	101.77	133.17	111.63	206.73	13.28	119.21	46.55	102.03	136	24.49	128.42	36.36	39.78	168.32	66.38	173.97	64.46	IPR008952; Tetraspanin, EC2 domain superfamily IPR018499; Tetraspanin/Peripherin
TdChr005.1793	102.54	197.75	62.6	72.11	96.79	79.28	217.41	152.57	378.28	80.28	139.43	351.38	815.89	1836.64	182.65	183.5	363.77	931.61	2630.69	92.3	810.53	44.5	33.28	IPR019376; Myeloid leukemia factor
TdChr005.1791	57.04	98.79	257.5	195.61	164.61	373.43	481.48	212.74	329.25	242.74	107.03	299.85	296.52	1448.29	182.11	152.39	374.06	302.21	1605.42	254.11	738.79	127.18	26.74	IPR016668; NADH dehydrogenase [ubiquinone] iron-sulfur protein 6, mitochondrial IPR019401; Zinc finger, CHCC-type
TdChr005.1788	2390.37	5036.27	4735.77	2435.64	1420.43	1254.14	1644.83	1626.86	276.54	1923.49	328.67	398.53	638.35	806.99	665.76	327.27	391.86	385.65	301.69	2796.67	778.59	2495.09	824.89	IPR027534; Ribosomal protein L12 family IPR038716; Ribosomal protein P1/P2, N-terminal domain
TdChr005.1768	523.61	343.71	178.51	107.26	128.06	74.37	227.35	355.86	60.21	424.94	54.59	172.84	143.22	267.96	90.56	96.34	176.43	164.85	162.26	474.31	119.28	44.56	28.91	IPR006760; Endosulphine
TdChr005.1759	129.49	176.35	75.51	58.18	63.92	51.89	87.28	97.89	75.86	108.97	54.17	93.41	68.93	72.8	92.07	77.56	112.31	84.77	58.36	160.64	153.56	31.15	39.59	IPR007785; Anamorsin IPR029063; S-adenosyl-L-methionine-dependent methyltransferase
TdChr005.1705	0	0.13	0.04	0	0.12	0.31	10.69	9.35	74.88	4.72	65.88	41.39	96.02	29.46	176.42	140.51	56.09	132.08	53.44	0.15	68.3	6.71	20.69	IPR003386; Lecithin:cholesterol/phospholipid:diacylglycerol acyltransferase IPR029058; Alpha/Beta hydrolase fold
TdChr005.170	2109.82	1068.9	767.46	965.7	319.33	176.23	339.91	436.19	72.54	469.44	66.5	69.26	85.23	157.74	77.25	87.55	83.13	87.09	57.57	829.3	141.63	540.11	42.56	IPR009779; Translocon-associated protein subunit gamma
TdChr005.1679	112.57	181.69	74.26	51.82	36.66	63.42	72.37	57.57	45.46	98.41	25.73	98.41	100.67	86.01	58.12	49.44	104.37	109.35	101.69	85.06	133.94	28.01	57.1	IPR001684; Ribosomal protein L27
TdChr005.1631	1083.62	532.7	476.81	498.95	210.94	152.32	199.47	281.11	65.59	331.06	63.56	96.17	98.56	148.24	116.28	84.84	98.4	111.42	63.71	341.75	109.77	374.75	29.44	IPR008855; Translocon-associated
TdChr005.1559	146.82	517.89	384.68	242	229.69	161.7	86.67	78.6	41.65	87.1	73.56	156.82	120.4	106.92	131.96	87.28	145.47	112.25	84.7	86.44	152.12	121.13	96.33	IPR002222; Ribosomal protein S19/S15 IPR005713; Ribosomal protein S19A/S15e IPR020934; Ribosomal protein S19 conserved site IPR023575; Ribosomal protein S19, superfamily
TdChr005.1524	189.34	241.25	175.64	142.45	144.9	94.6	107.72	137.42	39.39	150.56	41.17	100.8	114.06	93.04	75.78	57.54	119.16	115.14	95.13	201.19	125.17	41.29	21.06	IPR002836; PDCD5-like IPR036883; PDCD5-like superfamily
TdChr005.1491	1.32	0.16	0	0	0	0.78	20.82	30.02	0.12	7.11	0.25	0	1.42	1.37	0.18	0.02	0.07	0.27	0.03	1.12	12.77	0	1994.35	IPR001930; Peptidase M1, alanine aminopeptidase/leukotriene A4 hydrolase IPR014782; Peptidase M1, membrane alanine aminopeptidase IPR024571; ERAP1-like C-terminal domain IPR034016; Aminopeptidase N-type IPR042097; Aminopeptidase N-like , N-terminal
TdChr005.1490	0.22	0	0	0	0	0.25	45.12	94.27	0.37	23.07	0.42	0.09	4.52	4.71	0.16	0.09	0.07	1.1	0.03	2.29	54.18	0	9084.92	IPR001930; Peptidase M1, alanine aminopeptidase/leukotriene A4 hydrolase IPR014782; Peptidase M1, membrane alanine aminopeptidase IPR024571; ERAP1-like C-terminal domain IPR034016; Aminopeptidase N-type IPR042097; Aminopeptidase N-like , N-terminal
TdChr005.1461	145.09	211.88	74.69	69.87	62.77	55.2	52.49	58.75	43.58	70.32	31.24	51.97	59.81	56.34	73.39	54.32	60.73	52.11	43.9	72.13	64.16	25.33	113.61	IPR019309; WASH complex subunit 3
TdChr005.1381	30.02	82.99	122.24	205.31	87.86	28.75	48.24	55.62	20.94	55.04	18.54	29.89	22.34	27.36	32.42	21.92	26.74	15	16.29	59.66	33.04	69.18	19.14	IPR001930; Peptidase M1, alanine aminopeptidase/leukotriene A4 hydrolase IPR012777; Leukotriene A4 hydrolase/leucine aminopeptidase IPR014782; Peptidase M1, membrane alanine aminopeptidase IPR015211; Peptidase M1, leukotriene A4 hydrolase/aminopeptidase C-terminal IPR016024; Armadillo-type fold IPR027268; Peptidase M4/M1, CTD superfamily IPR034015; Aminopeptidase, leukotriene A4 hydrolase-like IP…
TdChr005.1378	57.48	77	80.34	63.91	43.57	34.97	49.46	57.59	36.02	98.11	34.66	68.31	72.73	64.65	95.65	42.4	85.06	67	60.25	75.6	65.21	37.25	47.14	IPR000808; Mrp, conserved site IPR019591; Mrp/NBP35 ATP-binding protein IPR027417; P-loop containing nucleoside triphosphate hydrolase IPR028601; Cytosolic Fe-S cluster assembly factor NUBP1/Nbp35 IPR033756; Flagellum site-determining protein YlxH/ Fe-S cluster assembling factor NBP35
TdChr005.1360	75.69	153.34	31.72	24.32	43.3	38.93	103.07	66.44	147.7	35.01	31.52	72.72	107.35	542.91	53.12	27.88	53.87	109.38	612.15	36.98	216.43	16.71	83.37	IPR009432; Protein of unknown function DUF1075
TdChr005.1354	217.25	211.93	207.26	173.94	162.51	71.72	154.87	175.38	96.57	212.71	54.04	93.98	80.38	105.91	107.61	91.69	104.66	81.4	54.42	188.93	77.54	69.42	29.44	IPR000555; JAB1/MPN/MOV34 metalloenzyme domain IPR024969; Rpn11/EIF3F, C-terminal IPR033858; 26S Proteasome non-ATPase regulatory subunit 7/8 IPR037518; MPN domain
TdChr005.1341	119.23	107.69	25.8	13.4	9.97	32.11	47.49	53.94	17.68	64.68	20.29	32.56	28.39	36.06	24.1	25.6	33.37	20.94	15.93	79.19	23.42	7.58	16.63	IPR007853; Zinc finger, DNL-type
TdChr005.1307	384.14	1155.48	1354.45	521.78	277.26	197.64	557.51	835.58	52.82	880.33	60.07	102.78	132.83	329.69	89.12	77.73	99.82	77.13	53.76	1098.73	129.68	190.54	32.15	IPR002715; Nascent polypeptide-associated complex NAC domain IPR016641; Nascent polypeptide-associated complex subunit alpha IPR038187; NAC A/B domain superfamily
TdChr005.1304	1006.25	1857.49	3288.07	1757.39	1384.31	888.97	1286.01	1541.38	337.15	1861.52	302.93	463.22	527.81	844.96	561.23	395.73	474.65	394.84	269.4	2251	938.77	1165.69	17.02	IPR000626; Ubiquitin-like domain IPR001975; Ribosomal protein L40e IPR019954; Ubiquitin conserved site IPR019956; Ubiquitin domain IPR029071; Ubiquitin-like domain superfamily IPR038587; Ribosomal protein L40e superfamily
TdChr005.1267	102.47	128.69	73.13	50.67	18.7	118.76	105.52	53.84	9.38	78.27	18.87	20.81	28.57	21	23.8	21.62	60.26	20.21	24.06	88.96	29.81	7.06	21	IPR003213; Cytochrome c oxidase, subunit VIb IPR036549; Cytochrome c oxidase, subunit VIb superfamily
TdChr005.1265	622.38	435.61	708.24	474.29	412.99	280.82	562.09	625.12	297.81	712.16	146.22	413.25	367.65	516.22	271.78	206.34	383.01	334.95	362.58	497.06	444.81	177.41	37.45	IPR003307; W2 domain IPR016021; MIF4G-like domain superfamily IPR016024; Armadillo-type fold
TdChr005.1262	427.87	470.93	531.96	429.39	440.78	306.08	396.88	403.77	330.75	467.16	147.11	480.72	320.73	393.04	334.94	208.31	477.05	344.3	464.78	388.61	548.76	201.77	483.79	IPR001253; Translation initiation factor 1A (eIF-1A) IPR006196; RNA-binding domain, S1, IF1 type IPR012340; Nucleic acid-binding, OB-fold IPR018104; Translation initiation factor 1A (eIF-1A), conserved site
TdChr005.1257	1065.42	1768.58	5418.54	3255.62	2873.21	1516.61	2176.83	2325.88	612.41	2737.72	620.39	941.56	1049.93	1462.59	1311.13	777.69	755.09	771.58	560.06	3469.74	2284.81	1606.95	26.43	IPR001976; Ribosomal protein S24e IPR012678; Ribosomal protein L23/L15e core domain superfamily IPR018098; Ribosomal S24e conserved site
TdChr005.1247	1.26	1.53	0	0	0.08	0	0.8	2.24	0.06	0.49	0.07	0.45	0	0	0	0	0	0.2	0.3	0	0.37	0	553.37	IPR000734; Triacylglycerol lipase family IPR013818; Lipase/vitellogenin IPR029058; Alpha/Beta hydrolase fold IPR033906; Lipase, N-terminal
TdChr005.1165	107.43	131.96	104.61	169.92	150.12	77	88.35	100.73	48.7	84.83	53.74	45.22	58.01	55.4	55.31	56.71	44.91	41.55	35.77	83.29	68.36	114.25	21.59	IPR002048; EF-hand domain IPR011992; EF-hand domain pair IPR018247; EF-Hand 1, calcium-binding site
TdChr005.1157	1056.42	354.15	428.6	432.33	279.1	116.9	280.74	402.29	64.7	476.79	78.65	91.87	83.27	188.13	86.88	98.25	81.83	59.01	44.14	327.45	63.15	202.53	114.74	IPR008814; Dolichyl-diphosphooligosaccharide--protein glycosyltransferase subunit Swp1
TdChr005.1131	856.86	685.75	628.14	498.54	208.62	133.11	411.05	658.98	182.23	761.39	112.78	247.35	247.82	379.37	206.62	183.63	314.13	263.42	232.94	783.07	237.03	266.11	55.11	IPR001326; Translation elongation factor EF1B, beta/delta chains, conserved site IPR014038; Translation elongation factor EF1B, beta/delta subunit, guanine nucleotide exchange domain IPR014717; Translation elongation factor EF1B/ribosomal protein S6 IPR018940; Elongation factor 1 beta central acidic region, eukaryote IPR036219; Translation elongation factor eEF-1beta-like superfamily
TdChr005.1127	524.39	527.06	421.4	285.09	248.96	178.37	229.09	265.82	155.31	405.15	153.51	174.17	195.18	234.82	410.22	278.3	224.22	189.96	103.57	269.79	224.06	167.79	147.8	IPR000426; Proteasome alpha-subunit, N-terminal domain IPR001353; Proteasome, subunit alpha/beta IPR023332; Proteasome alpha-type subunit IPR029055; Nucleophile aminohydrolases, N-terminal
TdChr005.1124	439.47	564.37	490.46	264.91	144.26	165.78	174.41	248.02	43.65	279.83	46.97	86.07	71.05	130.17	82.93	56.52	80.1	50.63	50.5	321.28	80.71	79.63	27.4	IPR000163; Prohibitin IPR001107; Band 7 domain IPR036013; Band 7/SPFH domain superfamily
TdChr005.1051	1322.55	1976.31	1057.21	1181.07	783.41	1034.86	2147.67	1034.01	2270.24	830.31	743.16	3415.77	2899.93	5878.08	1425.7	997.76	4025.89	3022.32	8959.33	529.96	3658.78	610.6	318.86	IPR006424; Glyceraldehyde-3-phosphate dehydrogenase, type I IPR020828; Glyceraldehyde 3-phosphate dehydrogenase, NAD(P) binding domain IPR020829; Glyceraldehyde 3-phosphate dehydrogenase, catalytic domain IPR020830; Glyceraldehyde 3-phosphate dehydrogenase, active site IPR020831; Glyceraldehyde/Erythrose phosphate dehydrogenase family IPR036291; NAD(P)-binding domain superfamily
TdChr005.1029	0	0	0.09	0.2	0.37	0	0.34	0.6	0.44	0.19	0.21	0.44	0.21	0.41	0	0.99	0.44	0.59	0.87	0	1.34	0	17.32	IPR004210; BESS motif IPR006578; MADF domain
TdChr005.1017	56.95	67.35	43.69	45.38	56.35	56.08	92.43	120.76	60.58	125.09	40.87	97.97	60.31	78.38	48.76	54.68	103.28	71.91	55.34	164.2	96.81	15.54	22.9	IPR005606; Sec20
TdChr005.1015	200.23	356.42	182.52	122.88	234.9	181.82	158.28	137.29	95.47	170.69	66.85	143.85	81.62	108.34	112.73	103.04	188.84	105.38	99.87	216.94	130.13	36.4	47.98	IPR027486; Ribosomal protein S10 domain IPR036838; Ribosomal protein S10 domain superfamily
TdChr005.100	187.43	149.75	74.28	96.6	75.74	45.72	86.91	102.79	74.61	93.75	51.2	57.46	52.14	61.54	57.45	69.69	58.12	57.39	44.89	131.63	52.05	61.74	29.18	IPR000727; Target SNARE coiled-coil homology domain IPR006012; Syntaxin/epimorphin, conserved site IPR010989; SNARE
TdChr005.066	1420.78	2377.04	5271.05	3542.45	1580.45	1639.84	2267.19	2888.81	482.43	3485.64	579.23	711.51	899.55	1453.24	1041.14	702.66	625.41	582.47	427.48	4373.17	1556.16	2452.44	69.54	IPR005680; Ribosomal protein S23, eukaryotic/archaeal IPR006032; Ribosomal protein S12/S23 IPR012340; Nucleic acid-binding, OB-fold
TdChr004.961	179.34	236.58	144.04	155.96	168.69	144.15	190.61	216.34	145.79	198.13	119.93	186.56	128.36	156.18	151.94	201.54	212.25	152.21	142.22	318.28	198.89	67.65	38.33	IPR019153; DDRGK domain containing protein IPR036388; Winged helix-like DNA-binding domain superfamily IPR036390; Winged helix DNA-binding domain superfamily
TdChr004.871	1089.23	732.48	369.73	452.13	246.22	142.57	261.99	288.23	172.72	272	122.59	121.99	131.46	164.71	162.11	205.73	172.7	191.35	140.68	375.64	238.2	301.53	16.62	IPR009038; GOLD domain
TdChr004.849	246.39	231.88	123.4	96.65	84.63	63.1	100.3	113.73	72.43	148.6	70.49	88.1	88.45	91.35	88.81	106.82	114.89	78.04	61.67	213.68	149.92	46.53	93.17	IPR004932; Retrieval of early ER protein Rer1
TdChr004.845	2660.08	4298.62	3456.44	2419.41	1561.1	1060.62	1555.65	1485.32	367.39	1802.92	304.75	480.17	508.09	707.23	487.78	315.97	403.13	309.53	276.5	2743.39	1055.32	1738.92	2596.8	IPR001141; Ribosomal protein L27e IPR005824; KOW IPR008991; Translation protein SH3-like domain superfamily IPR018262; Ribosomal protein L27e, conserved site IPR038655; Ribosomal protein L27e superfamily IPR041991; Eukaryotic Ribosomal Protein L27, KOW domain
TdChr004.826	6081.57	4363.9	9633.05	7193.15	4602.39	2400.79	5041.8	6962.4	903.97	7397.59	758.14	1325.77	1485.9	2956.82	2165.72	1016.18	1321.75	990.59	908.27	6339.31	1632.31	3579.34	26.11	IPR000795; Transcription factor, GTP-binding domain IPR004160; Translation elongation factor EFTu/EF1A, C-terminal IPR004161; Translation elongation factor EFTu-like, domain 2 IPR004539; Translation elongation factor EF1A, eukaryotic/archaeal IPR009000; Translation protein, beta-barrel domain superfamily IPR009001; Translation elongation factor EF1A/initiation factor IF2gamma, C-terminal IPR02741…
TdChr004.801	142.69	110.54	37.92	34.24	61.16	39.5	49.49	54.82	32.12	74.74	39.74	34.61	37.8	39.01	42.05	52.64	48.35	43.92	26.29	70.75	60.26	5.77	20.79	IPR009294; Gamma-secretase subunit Aph-1
TdChr004.754	486.75	455.45	185.87	192.27	281.23	356.02	174.25	177.73	218.66	325.55	380.19	455.42	543.3	364.37	512.01	575.66	549.84	601.31	435.83	216.88	340.64	72.5	60.96	IPR001388; Synaptobrevin IPR016444; Synaptobrevin/Vesicle-associated membrane protein IPR042855; v-SNARE, coiled-coil homology domain
TdChr004.721	120.49	124.17	75.41	65.56	31.48	22.79	58.6	84.77	14.4	97.99	18.86	30.4	24.74	49.13	24.51	20.24	24.71	17.21	17.31	114.63	35.14	15.79	40.92	IPR001107; Band 7 domain IPR033294; Erlin1/2 IPR036013; Band 7/SPFH domain superfamily
TdChr004.696	18.66	52.85	63.1	57.75	64.05	54.6	60.92	49.03	48.5	52.63	27.71	70.33	48.83	69.31	40.96	33.27	52.09	57.17	94.09	98.64	216.08	17.52	28.85	IPR028227; Uncharacterised protein family UPF0449
TdChr004.664	128.16	124.69	86.25	71.3	65.15	119.66	97.51	71.06	85.66	98.92	66.11	128.1	151.31	132.57	128.09	92.55	199.36	185.85	210.51	89.05	122.28	17.75	32.82	IPR009287; Transcription initiation Spt4 IPR022800; Spt4/RpoE2 zinc finger IPR029040; RNA polymerase subunit RPABC4/transcription elongation factor Spt4 IPR038510; Spt4 superfamily
TdChr004.658	1695.98	2597.73	4790.32	2844.92	2541.54	1528.02	2360.5	2883.71	686.63	2625.14	643.17	890.52	1082.61	1347.17	1318.39	761.59	767.03	790.15	649.13	2942.17	1972.66	1832.22	44.94	IPR005485; Ribosomal protein L5 eukaryotic/L18 archaeal IPR025607; Ribosomal protein L5 eukaryotic/L18 archaeal, C-terminal
TdChr004.601	435.92	339.55	409.09	323.78	223.22	579.99	895.79	321.73	501.97	305.4	258.2	657.23	726.4	2015.94	441.55	326.12	717.68	908.95	3049.37	237.83	1030.37	154.22	38.67	IPR004192; Cytochrome b-c1 complex subunit Rieske, transmembrane domain IPR005805; Rieske iron-sulphur protein, C-terminal IPR006317; Ubiquinol-cytochrome c reductase, iron-sulphur subunit IPR015248; Ubiquinol-cytochrome c reductase 8kDa, N-terminal IPR017941; Rieske [2Fe-2S] iron-sulphur domain IPR036922; Rieske [2Fe-2S] iron-sulphur domain superfamily IPR037008; Cytochrome bc1 complex subunit R…
TdChr004.600	658.24	1148.09	3668.54	2333.92	1773.98	747.56	1589.62	1908.3	447.72	1624.45	315.56	437.43	494.74	731.21	590.19	387.61	376.13	387.95	312.77	2572.57	999.62	1297.53	807.94	IPR000589; Ribosomal protein S15 IPR009068; S15/NS1, RNA-binding IPR012606; Ribosomal protein S13/S15, N-terminal IPR023029; Ribosomal protein S15P
TdChr004.548	33.23	109.13	31.05	28.28	45.33	49.5	89.79	115.02	34.42	248.8	50.58	86.46	149.29	140.93	72.47	97.91	83	130.61	70.75	246.66	226.67	9.05	28.4	IPR029383; ADP-ribosylation factor-like protein 6-interacting protein 6
TdChr004.488	1613.69	544.58	1989.52	2945.41	1197.08	646.17	1841.26	2682.3	490.39	2484.25	371.41	337.63	467.21	1010.14	637.48	655	412.34	462.26	305.02	2597.48	262.85	1038.56	1220.27	IPR001580; Calreticulin/calnexin IPR009033; Calreticulin/calnexin, P domain superfamily IPR009169; Calreticulin IPR013320; Concanavalin A-like lectin/glucanase domain superfamily IPR018124; Calreticulin/calnexin, conserved site
TdChr004.476	203.17	161.1	34.48	41.15	45.08	41.09	121.53	160.58	63.09	177.01	29.12	69.69	136.29	290.67	43.39	44.08	81.36	138.61	388.27	212.09	143.14	12.46	18.09	IPR003890; MIF4G-like, type 3 IPR016021; MIF4G-like domain superfamily IPR016024; Armadillo-type fold
TdChr004.425	135.27	138.86	86.77	23.59	9.86	20.9	50.87	66.82	6.24	101.66	7.73	2.58	24.89	31.27	17.01	15	31.34	17.84	11.15	66.9	11.09	16.57	49.82	IPR001222; Zinc finger, TFIIS-type IPR012164; DNA-directed RNA polymerase subunit/transcription factor S IPR019761; DNA-directed RNA polymerase M, 15kDa subunit, conserved site IPR034004; Pol I subunit A12, C-terminal zinc ribbon
TdChr004.388	0	0	0	0	0	1.65	22.14	26.8	0	6.25	0.14	0	1.33	2.17	0	0	0	0.52	0	1.26	17.86	0	10994.2	IPR001212; Somatomedin B domain IPR003961; Fibronectin type III IPR013783; Immunoglobulin-like fold IPR036116; Fibronectin type III superfamily
TdChr004.303	0	0	0	0.08	0	0	9.82	18.1	0	3.19	0	0	0.83	0.82	0	0	0	0.46	0	0.86	12.45	0	20037.2	IPR001283; Cysteine-rich secretory protein-related IPR002413; Venom allergen 5-like IPR014044; CAP domain IPR018244; Allergen V5/Tpx-1-related, conserved site IPR035940; CAP superfamily
TdChr004.297	0	0	0	0	0	1.3	28.17	38.06	0	7.1	0	0	3.09	7.35	0	0	0	0.47	0	0.69	25.9	0	17519.6	IPR001283; Cysteine-rich secretory protein-related IPR002413; Venom allergen 5-like IPR014044; CAP domain IPR018244; Allergen V5/Tpx-1-related, conserved site IPR035940; CAP superfamily
TdChr004.296	0	0.26	0	0	0	1.07	15.54	21.31	0.53	10.37	1.46	0.24	3.27	3.54	2.85	1.85	2.16	3.19	0.93	0.44	23.35	0	5413.26	IPR001283; Cysteine-rich secretory protein-related IPR002413; Venom allergen 5-like IPR014044; CAP domain IPR018244; Allergen V5/Tpx-1-related, conserved site IPR034763; Venom allergen 3, insect IPR035940; CAP superfamily
TdChr004.254	754.07	1341.37	1066.96	712.18	430.58	359.65	749.75	576.71	892.79	476.76	1090.38	751.52	1280.08	526.38	838.39	2059.48	711.13	1253.01	418.26	612.17	1443.31	83.76	21.17	IPR005746; Thioredoxin IPR013766; Thioredoxin domain IPR017937; Thioredoxin, conserved site IPR036249; Thioredoxin-like superfamily
TdChr004.2333	963.7	564.09	1446.1	1125.09	1091.38	460.3	707.26	699.74	604.32	576.32	322.22	480.82	495.77	451.54	627.06	442.21	362.88	401.06	338.27	440.33	834.08	613.81	21.72	IPR000629; ATP-dependent RNA helicase DEAD-box, conserved site IPR001650; Helicase, C-terminal IPR011545; DEAD/DEAH box helicase domain IPR014001; Helicase superfamily 1/2, ATP-binding domain IPR014014; RNA helicase, DEAD-box type, Q motif IPR027417; P-loop containing nucleoside triphosphate hydrolase
TdChr004.2299	181.92	525.8	392.93	527.32	211.49	60.58	129.21	146.14	61.64	131.16	50.11	31.33	30.45	81.06	119.53	13.06	41	33.29	21.55	150.99	47.04	129.93	132.09	IPR010357; Domain of unknown function DUF953, thioredoxin-like IPR036249; Thioredoxin-like superfamily
TdChr004.2289	0	0	0	0.06	0.13	0.07	14.38	21.78	1.58	6.86	0.08	0	1.3	1.32	0.1	0	0	0.22	0	2.27	20.11	0	5974.48	IPR001818; Peptidase M10, metallopeptidase IPR002477; Peptidoglycan binding-like IPR006026; Peptidase, metallopeptidase IPR018486; Hemopexin, conserved site IPR018487; Hemopexin-like repeats IPR021190; Peptidase M10A IPR024079; Metallopeptidase, catalytic domain superfamily IPR036365; PGBD-like superfamily IPR036375; Hemopexin-like domain superfamily
TdChr004.2279	19.06	49.26	40.27	44.97	47.8	29.04	47.26	60.56	32.1	71.64	35.65	42.13	53.97	49.71	47.98	70.19	54.88	45.64	35.91	69.38	53.9	11.61	26.26	IPR001270; ClpA/B family IPR003593; AAA+ ATPase domain IPR010448; Torsin IPR027417; P-loop containing nucleoside triphosphate hydrolase
TdChr004.2275	12.55	215.73	74.12	54.92	76.04	66.76	33.56	17.45	22.29	11.72	30.36	35.89	30.6	17.15	41.02	39.96	50.29	37.29	18.67	10.85	40.85	16.54	20.97	IPR003029; S1 domain IPR005576; RNA polymerase Rpb7-like , N-terminal IPR012340; Nucleic acid-binding, OB-fold IPR036898; RNA polymerase Rpb7-like, N-terminal domain superfamily
TdChr004.2273	131.14	104.57	21.78	49.31	73.01	29.02	116.59	151.25	51.96	173.87	36.24	36.19	47.27	90.75	46.08	69.89	40.03	50.17	41.95	207.89	51.74	92.41	25.11	IPR014830; Glycolipid transfer protein domain IPR036497; Glycolipid transfer protein superfamily
TdChr004.2268	594.2	423.82	342.26	485.02	215.52	198.71	244.71	300.08	114.56	393.44	112.12	168.21	191.66	239.44	214.44	190.62	200.63	225.17	164.26	373.2	249.04	357.09	281.36	IPR009038; GOLD domain IPR036598; GOLD domain superfamily
TdChr004.2260	607.33	402.86	213.7	246.12	136.79	88.7	122.94	122.11	73.46	124	92.62	92.49	86.45	82.2	111.98	120.05	107.38	91.55	61.39	163.77	115.91	178.94	55.44	IPR007653; Signal peptidase complex subunit 3
TdChr004.2228	275.64	219.15	90.51	93.79	73.96	57.79	90.42	124.38	48.42	228.58	51.08	118.56	80.83	123.69	111.26	71.28	131.46	68.4	65.43	223.03	98.31	38.33	37.3	IPR011893; Selenoprotein, Rdx-type IPR036249; Thioredoxin-like superfamily
TdChr004.214	386.98	1084.06	4019.37	2611.69	2502.3	1418.68	1856.65	2177.47	585.92	2049.65	437.9	780.46	837.81	1118.13	927.66	619.27	616.76	641.23	482.48	2727.34	1975.01	1274.2	17.37	IPR000530; Ribosomal protein S12e IPR004038; Ribosomal protein L7Ae/L30e/S12e/Gadd45 IPR029064; 50S ribosomal protein L30e-like
TdChr004.212	180.67	151.39	86.08	101.19	125.05	69.57	76	63.26	119.34	58.9	83.16	90.99	94.97	59.03	98.07	97.77	97.4	96.85	69.39	69.09	109.65	51.15	20.59	IPR013784; Carbohydrate-binding-like fold IPR019008; Domain of unknown function DUF2012
TdChr004.2090	38.77	150.46	78.93	66.32	40.83	51.16	37.32	20.06	42.8	18.03	18.09	19.34	18.88	17.54	44.76	23.42	27.48	19.69	14.47	16.49	32.57	51.6	49.82	IPR000866; Alkyl hydroperoxide reductase subunit C/ Thiol specific antioxidant IPR013766; Thioredoxin domain IPR019479; Peroxiredoxin, C-terminal IPR024706; Peroxiredoxin, AhpC-type IPR036249; Thioredoxin-like superfamily
TdChr004.2061	3709.03	5701.56	3343.44	1900.18	1331.49	1181.97	1290.02	1487.5	332.45	2256.77	484.05	693.22	819.04	1130.62	944.88	529.65	566.72	558.67	418.17	1994.72	930.54	1427.63	1779.57	IPR001197; Ribosomal protein L10e IPR016180; Ribosomal protein L10e/L16 IPR018255; Ribosomal protein L10e, conserved site IPR036920; Ribosomal protein L10e/L16 superfamily
TdChr004.2029	43.67	20.59	14.74	13.98	14.56	14.94	26.02	31.15	11.83	39.13	12.84	26.23	20.62	25.25	24.74	19.98	33.01	20.82	12.9	54.91	34.72	7.79	25.23	IPR001841; Zinc finger, RING-type IPR006845; Pex, N-terminal IPR013083; Zinc finger, RING/FYVE/PHD-type IPR017907; Zinc finger, RING-type, conserved site IPR018957; Zinc finger, C3HC4 RING-type
TdChr004.193	241.71	251.49	126.32	134.64	173.49	99.63	150.61	153.71	167.94	166.65	146.58	211.47	214.4	214.81	183.33	191.23	242.98	233.23	237.91	233.79	318.07	62.31	27.32	IPR009445; TMEM85/ER membrane protein complex subunit 4
TdChr004.1886	2015.04	1444.26	1145.49	822.23	391.34	606.61	1019.31	978.89	219.99	1113.68	88.83	280.99	237.69	536.19	113.55	85.33	287.29	153.67	369.23	1110.41	207.5	270.82	26.55	IPR001925; Porin, eukaryotic type IPR023614; Porin domain superfamily IPR027246; Eukaryotic porin/Tom40
TdChr004.1869	136.23	188.16	125.4	112.03	75.88	81.8	61.04	70.55	14.35	78.39	17.91	42.7	26.25	43.72	61.17	32.27	46.65	19.05	15.92	79.08	39.78	36.38	22.53	IPR002818; DJ-1/PfpI IPR006287; Protein/nucleic acid deglycase DJ-1 IPR029062; Class I glutamine amidotransferase-like
TdChr004.1863	33.71	36.9	76.7	61.53	52.78	19.69	79.53	94.86	417.08	72.6	42.35	35.48	33.39	91.24	383.71	43.23	37.06	38.24	111.58	62.09	26.17	17.35	24.87	IPR004119; Ecdysteroid kinase-like IPR011009; Protein kinase-like domain superfamily IPR015897; CHK kinase-like
TdChr004.1856	111.06	59.73	25.15	28	28.03	19.23	36.94	48.15	21.33	52.3	15.34	38.02	33.99	40.21	31.74	27.53	37.24	35.7	31.85	46.01	30.69	7.63	28.88	IPR000210; BTB/POZ domain IPR011333; SKP1/BTB/POZ domain superfamily IPR028271; RNA guanine-N7 methyltransferase activating subunit IPR034750; CULT domain
TdChr004.1820	424.35	422.31	644.14	329.6	285.31	94.48	234.54	328.68	39.59	283.34	35.53	25.92	93.1	153.05	27.87	48.69	17.75	33.24	30.69	572.78	53.57	90.78	40.49	IPR001163; LSM domain, eukaryotic/archaea-type IPR010920; LSM domain superfamily IPR027078; Small nuclear ribonucleoprotein E
TdChr004.1807	410.38	262.68	112.23	103.57	181.74	68.92	144.24	156.05	106.62	131.52	51.57	160.88	98.01	117.56	82.06	72.08	166.7	107.37	134.06	221.38	107.5	34.48	48.35	IPR002999; Tudor domain IPR010304; Survival motor neuron
TdChr004.1775	0.22	9.85	16.41	23.95	4.01	13.65	7.38	4.1	25.15	4.14	10.36	4.37	11.77	8.85	98.73	7.7	4.01	9.3	5.13	1.81	6.86	162.31	36.66	IPR002018; Carboxylesterase, type B IPR019819; Carboxylesterase type B, conserved site IPR019826; Carboxylesterase type B, active site IPR029058; Alpha/Beta hydrolase fold
TdChr004.1773	20.63	896.86	72.84	148.71	963.18	207.59	481.95	472.18	885.71	378.95	812.25	1376.13	1035.39	669.55	1951.99	1262.72	1536.8	1332.74	1044.86	388.29	1813.37	192.37	36.34	IPR018792; Nuclear protein 1-like
TdChr004.1763	0	0	0	0.07	0	0.09	1.11	1.79	0	0.48	0	0	0	0	0	0	0	0	0	0.05	1.39	0	933.84	IPR001590; Peptidase M12B, ADAM/reprolysin IPR024079; Metallopeptidase, catalytic domain superfamily IPR041645; ADAM cysteine-rich domain 2
TdChr004.1762	0	0	0	0	0	0.78	12.85	16.6	0	7.03	0	0	1.66	2.16	0	0	0	0.52	0.14	0.98	13.4	0	1333.76	IPR001590; Peptidase M12B, ADAM/reprolysin IPR024079; Metallopeptidase, catalytic domain superfamily IPR041645; ADAM cysteine-rich domain 2
TdChr004.1761	0	0	0	0	0.06	0.1	11.75	20.1	0.04	5.68	0.16	0.11	1.48	1.85	0	0	0.17	0.85	0.53	0.67	22.63	0	3399.44	IPR001590; Peptidase M12B, ADAM/reprolysin IPR024079; Metallopeptidase, catalytic domain superfamily IPR041645; ADAM cysteine-rich domain 2
TdChr004.1760	0	0	0	0	0	0.2	18.21	26.7	0	9.84	0.32	0	1.13	2.66	0	0.05	0	0.23	0	1.4	24.78	0	29394.1	IPR001590; Peptidase M12B, ADAM/reprolysin IPR024079; Metallopeptidase, catalytic domain superfamily IPR041645; ADAM cysteine-rich domain 2
TdChr004.1757	0	0	0	0	0.06	0.29	21.46	31.96	0.12	9.28	0.15	0	2.27	2.44	0	0	0.08	1.03	0.5	0.53	24.22	0	6363.3	IPR001590; Peptidase M12B, ADAM/reprolysin IPR024079; Metallopeptidase, catalytic domain superfamily IPR041645; ADAM cysteine-rich domain 2
TdChr004.1753	0.1	0	0	0	0	0.1	16.38	23.58	0.37	5.69	0	0	2.54	1.85	0	10.29	0	0.52	0.15	0.69	25.22	0	10109.1	IPR001590; Peptidase M12B, ADAM/reprolysin IPR024079; Metallopeptidase, catalytic domain superfamily IPR041645; ADAM cysteine-rich domain 2
TdChr004.1748	351.2	541.7	777.46	576.89	426.73	2146.97	1217.18	385.44	680.1	761.98	417.95	941.07	821.75	1142.41	717.17	608.9	1138.88	835.74	1303.92	545.41	1291.78	492.01	35.16	IPR001349; Cytochrome c oxidase, subunit VIa IPR036418; Cytochrome c oxidase, subunit VIa superfamily
TdChr004.1747	42.6	233.72	2465.81	1283.77	959.53	1206.38	1003.48	1083.26	268.88	2071.96	368.46	514.93	592.93	921.03	879.34	503.78	542.13	416.19	335.63	2495.15	1048.16	1045.06	36.58	IPR001931; Ribosomal protein S21e IPR018279; Ribosomal protein S21e, conserved site IPR038579; Ribosomal protein S21e superfamily
TdChr004.1696	270.96	143.82	153.17	114.17	148.16	40.5	257.01	395.42	100.88	322.69	31.07	148.7	64.33	116.86	53.16	62.03	112.34	88.82	76.69	496.96	79.06	37.87	31.12	IPR018276; DET1- and DDB1-associated protein 1, N-terminal
TdChr004.1683	129.09	168.95	50.39	31.98	43.01	27.92	31.9	57.49	17.75	51.6	9.05	21.79	34.34	25.49	35.94	12.21	19.59	24.16	19.65	44.41	45.9	10.11	47.62	IPR005574; RNA polymerase subunit RPB4/RPC9 IPR006590; RNA polymerase Rpb4/RPC9, core IPR010997; HRDC-like superfamily IPR038324; Rpb4/RPC9 superfamily
TdChr004.1682	385.12	357.8	114.14	83.64	59.66	51.19	70.79	89.3	20.11	106.44	21	38.32	35.31	38.93	44.54	25.84	46.08	27.77	19.57	108.16	27.53	36.09	42.24	IPR001950; SUI1 domain IPR005873; DENR family, eukaryotes IPR036877; SUI1 domain superfamily
TdChr004.1642	368.51	231.28	81.39	74.52	50.61	58.92	91.74	100.54	47.49	164.1	47.43	77.92	80.86	90.43	81.14	75.03	97.14	68.02	42.74	164.52	55.97	52.94	33.89	IPR002809; Integral membrane protein EMC3/TMCO1-like IPR008559; Calcium load-activated calcium channel
TdChr004.160	181.31	213.02	270.18	182.61	167.37	113.47	158.93	181.81	115.78	215.13	76.67	144.11	143.85	154.3	232.23	122.65	187.82	159.34	151.08	217.85	179.64	90.92	35.91	IPR008979; Galactose-binding-like domain superfamily IPR010400; PITH domain IPR013766; Thioredoxin domain IPR017937; Thioredoxin, conserved site IPR036249; Thioredoxin-like superfamily IPR037047; PITH domain superfamily
TdChr004.1586	2151.07	621.36	1117.98	2290.23	848.47	348.29	974.01	1406.8	333.15	1231.63	320.03	218.43	377.53	521.32	409.89	486.02	313.53	345.15	247.86	631.29	69.22	967.15	50.68	IPR013126; Heat shock protein 70 family IPR018181; Heat shock protein 70, conserved site IPR029047; Heat shock protein 70kD, peptide-binding domain superfamily IPR029048; Heat shock protein 70kD, C-terminal domain superfamily IPR042050; Endoplasmic reticulum chaperone BIP, nucleotide-binding domain
TdChr004.1556	2.94	220.72	11.82	41.66	15.55	2.4	15.34	25.18	65.98	1.99	1.05	168.64	17.32	78.5	39.74	1.99	162.04	11.42	76.63	1.46	37.3	764.3	75.63	IPR002502; N-acetylmuramoyl-L-alanine amidase domain IPR006619; Peptidoglycan recognition protein family domain, metazoa/bacteria IPR017331; Peptidoglycan recognition protein, PGRP-S IPR036505; N-acetylmuramoyl-L-alanine amidase/PGRP domain superfamily
TdChr004.1458	40.27	135.9	63.47	43.49	50.58	62.02	107.64	105.16	166.67	106.82	151.78	153.61	143.62	115.42	235.15	145.93	189.75	164.64	110.42	162.6	150.16	229.08	20.19	IPR023210; NADP-dependent oxidoreductase domain IPR036812; NADP-dependent oxidoreductase domain superfamily
TdChr004.1456	43.82	651	531.47	411.11	137.19	99.25	122.95	134.13	118.58	155.08	158.74	160.58	254.38	123.52	106.6	118.77	141.65	207.29	99.3	152.01	166.62	180.57	245.08	IPR018170; Aldo/keto reductase, conserved site IPR020471; Aldo/keto reductase IPR023210; NADP-dependent oxidoreductase domain IPR036812; NADP-dependent oxidoreductase domain superfamily
TdChr004.1416	114.37	114.57	133.18	189.02	137.15	53.23	101.36	146.35	51.83	181.59	50.05	46.61	58.45	81.28	54.23	58.01	43.05	43.55	40.24	177.08	44.69	116.01	53.71	IPR003689; Zinc/iron permease
TdChr004.1388	619.84	528.14	240.18	175.94	164.01	95.16	154	157.86	110.98	209.64	83.59	146.45	125.7	125.35	189.36	137.62	161.71	133.19	83.04	178.16	162.71	86.76	20.47	IPR003593; AAA+ ATPase domain IPR003959; ATPase, AAA-type, core IPR003960; ATPase, AAA-type, conserved site IPR005937; 26S proteasome regulatory subunit P45-like IPR027417; P-loop containing nucleoside triphosphate hydrolase IPR032501; Proteasomal ATPase OB C-terminal domain IPR041569; AAA ATPase, AAA+ lid domain
TdChr004.1387	790.06	618.94	241.91	151.41	144.42	119.65	155.34	207.44	42.55	254.94	60.45	138.24	90.85	135.91	99.31	77.01	111.57	82.81	65.99	341.6	99.4	86.74	30.65	IPR000504; RNA recognition motif domain IPR008111; RNA-binding motif protein 8 IPR012677; Nucleotide-binding alpha-beta plait domain superfamily IPR033744; RBM8, RNA recognition motif IPR035979; RNA-binding domain superfamily
TdChr004.1367	518.01	1156.27	569.47	393.2	510.41	1147.17	369.91	235.23	296.26	383.22	278.77	482.49	423.92	404.68	802.05	456.42	605.25	474.77	399.41	376.04	1004.07	348.71	18.89	IPR001848; Ribosomal protein S10 IPR005729; Ribosomal protein S10, eukaryotic/archaeal IPR027486; Ribosomal protein S10 domain IPR036838; Ribosomal protein S10 domain superfamily
TdChr004.1365	476.08	884.15	1451.96	825.94	491.58	489.09	514.93	566.11	76.63	1036.2	114.91	179.12	262.36	488.09	324.21	179.55	219.48	168.74	123.12	809.73	395.65	549.85	342.02	IPR001848; Ribosomal protein S10 IPR005729; Ribosomal protein S10, eukaryotic/archaeal IPR027486; Ribosomal protein S10 domain IPR036838; Ribosomal protein S10 domain superfamily
TdChr004.1362	172.97	122.77	112.79	77.25	71.61	40.91	85.01	99.59	22.01	111.83	20.89	40.19	31.57	55.35	32.71	25.8	36.61	17.45	20.36	198.54	44.15	12.33	16.55	IPR002848; Translin family IPR016068; Translin, N-terminal IPR016069; Translin, C-terminal IPR033956; Translin IPR036081; Translin superfamily
TdChr004.1360	647.19	1314.67	629.47	530.12	320.94	432.2	444.97	346.62	348.31	387.62	262.34	272.22	217.54	218.62	475.32	437.97	196.28	218.57	145.59	330.79	364.14	406.92	32.17	IPR002109; Glutaredoxin IPR011899; Glutaredoxin, eukaryotic/virial IPR014025; Glutaredoxin subgroup IPR036249; Thioredoxin-like superfamily
TdChr004.1359	24.66	8.83	14.81	33.81	29.91	9.44	26.69	39.62	23.54	42.35	15.81	20.04	53.38	54.82	20.48	20.51	22.84	51.72	52.85	72.43	70.6	2.7	34.38	IPR010711; Group XII secretory phospholipase A2 precursor IPR033113; Phospholipase A2, histidine active site IPR036444; Phospholipase A2 domain superfamily
TdChr004.135	211.98	242.62	95.83	68.46	53.5	136.66	169.19	78.71	77.83	81.45	39.15	65.27	72.54	92.67	74.47	47.78	84.76	88.76	106.02	126.72	140.75	27.69	24.02	IPR019329; NADH:ubiquinone oxidoreductase, ESSS subunit
TdChr004.1330	742.5	263.77	133.64	158.13	73.17	65.22	205.52	297.72	77.29	333.76	81.77	67.76	83.05	149.27	115.53	140.39	94.41	88.63	52.8	415.54	60.6	89.33	234.27	IPR001623; DnaJ domain IPR002939; Chaperone DnaJ, C-terminal IPR008971; HSP40/DnaJ peptide-binding IPR018253; DnaJ domain, conserved site IPR036869; Chaperone J-domain superfamily
TdChr004.133	243.49	294.37	250.06	239.74	148.35	79.96	128.44	128.42	34.71	228.61	46.26	52.07	82.65	86.03	82.95	92.95	77.2	57.01	41.28	305.17	92.25	114.79	608.08	IPR003038; DAD/Ost2
TdChr004.1304	38.69	59.42	30.65	40.61	40.08	23.7	36.51	38.37	40.86	26.7	29.11	43.18	29.62	25.94	33.7	30.17	32.22	30.04	23.96	57.51	98.04	23.34	63.59	IPR013766; Thioredoxin domain IPR036249; Thioredoxin-like superfamily
TdChr004.1292	44.15	80.28	78.11	110.12	58.61	35.31	64.35	84.18	41.75	95.37	41.05	66.27	49.96	60.33	62.98	58.46	59.5	45.98	35.91	112.55	81.14	62.23	36.04	IPR001623; DnaJ domain IPR004179; Sec63 domain IPR014756; Immunoglobulin E-set IPR035892; C2 domain superfamily IPR036869; Chaperone J-domain superfamily
TdChr004.1260	1982.89	3249.21	6073.32	4363.96	3493.76	3840.04	3028.97	3550.25	872.46	5637.65	1187.13	1692.86	2005.17	3054.34	2336.37	1375.53	1640.53	1512.36	1170.67	4965.5	2497.78	3563.56	1444.02	IPR000218; Ribosomal protein L14P IPR019972; Ribosomal protein L14P, conserved site IPR036853; Ribosomal protein L14 superfamily
TdChr004.1257	176.03	208.19	116.58	154	206.79	109.63	206.54	199.89	194.16	152.37	94.11	229.95	164.17	177.75	125.87	136.73	262.7	181.5	237.03	186.74	156.94	49.33	60.19	IPR001806; Small GTPase IPR005225; Small GTP-binding protein domain IPR027417; P-loop containing nucleoside triphosphate hydrolase
TdChr004.1252	172.57	259.46	70.63	60.72	80.59	64.67	75.89	78.24	52.42	82.26	44.52	96.26	84.3	77.21	64.08	61.17	103.19	93.62	76.21	117.23	154.61	19.41	120.35	IPR019564; Mitochondrial outer membrane transport complex Sam37/metaxin, N-terminal domain IPR033468; Metaxin, glutathione S-transferase domain IPR036282; Glutathione S-transferase, C-terminal domain superfamily IPR040079; Glutathione Transferase family
TdChr004.1222	1104.84	1001.33	437.49	327.53	289.35	219.57	303.32	348.96	240.11	462.83	178.29	225.31	180.6	232.26	398.52	268.6	279.7	224.42	169.9	327.17	274.95	168.68	34.36	IPR001353; Proteasome, subunit alpha/beta IPR023332; Proteasome alpha-type subunit IPR029055; Nucleophile aminohydrolases, N-terminal
TdChr004.1211	694.42	665.44	245.5	234.58	268.47	248.04	251.51	261.25	243.63	217.7	113.32	243	173.78	162.08	185.75	172.3	277.64	240.1	177.29	223.52	263.86	116.63	960.39	IPR018937; Magnesium transporter
TdChr004.1200	862.07	685.64	201.86	163.48	110.98	102.89	204.71	281.93	59.99	361.4	46.01	110.76	105.47	174.92	64.58	55.32	90.65	91.11	83.97	350.94	88.19	79.29	43.33	IPR004403; Peptide chain release factor eRF1/aRF1 IPR005140; eRF1 domain 1/Pelota-like IPR005141; eRF1 domain 2 IPR005142; eRF1 domain 3 IPR024049; Peptide Chain Release Factor eRF1/aRF1, N-terminal IPR029064; 50S ribosomal protein L30e-like IPR042226; eRF1, domain 2 superfamily
TdChr004.115	257.51	431.06	162.6	105.86	94.84	216.12	258.74	115.18	104.53	109.3	56.78	110.4	101.83	111.66	81.81	64.33	99.69	86.25	97.79	164.55	169.35	45.52	143.5	IPR010625; CHCH IPR016680; NADH dehydrogenase [ubiquinone] (complex I), alpha subcomplex, subunit 8
TdChr004.1138	168.93	247.78	267.12	239.78	259.01	115.6	219.76	181.29	162.49	141.53	67.54	90.42	47.64	104.7	95.23	81.19	110.5	114.93	54.71	194.67	136.21	51.93	112.06	IPR001209; Ribosomal protein S14
TdChr004.107	94.48	85	24.04	19.97	29.05	33.07	42.37	59.72	15.6	80.92	14.26	20.75	18.73	38.34	21.46	18.27	27.38	21.76	27.09	101.57	22.16	9.91	26.6	IPR002156; Ribonuclease H domain IPR009027; Ribosomal protein L9/RNase H1, N-terminal IPR011320; Ribonuclease H1, N-terminal IPR012337; Ribonuclease H-like superfamily IPR017067; Ribonuclease H1, eukaryote IPR036397; Ribonuclease H superfamily IPR037056; Ribonuclease H1, N-terminal domain superfamily
TdChr004.1066	189.61	168.19	114.46	111.5	152.57	108.92	139.83	158.29	75.7	183.38	69.6	123.83	91.62	116.08	99.31	91.46	139.03	94.05	87.58	213.66	83.91	41.1	45.14	IPR008628; Golgi phosphoprotein 3-like IPR038261; Golgi phosphoprotein 3-like domain superfamily
TdChr004.1049	270.03	251.51	62.12	65.52	86.83	52.64	87.95	117.29	68.55	103.12	37.13	101.03	51.96	63.21	48.38	53.35	100.22	60.41	50.55	118.33	94.68	17.42	20.14	IPR018609; Bud13
TdChr004.1044	131.22	138.07	35.75	52.39	123.52	164.81	104.9	79.89	77.02	354.22	148.23	285.43	189.3	228.29	229.78	212.1	221.04	250.41	175.63	267.34	159.09	64.52	251.12	IPR018783; Transcription factor, enhancer of yellow 2 IPR038212; Transcription factor EnY2 superfamily
TdChr004.1041	244.14	334.44	107.15	80.3	60.22	74.56	78.09	72.12	45.68	101.57	58.8	112.82	81.41	73.59	89.09	74.1	109.87	86.62	68.77	112.17	136.67	44.84	46.51	IPR021131; Ribosomal protein L18e/L15P IPR030878; Ribosomal protein L15 IPR036227; Ribosomal L18e/L15P superfamily
TdChr004.089	147.69	166.37	45.54	40.48	60.98	31.26	63.47	92.08	55.16	79.97	41.51	57.87	51.51	65.19	49	57.94	59.04	55.39	42.53	156.51	69.82	15.91	71.76	IPR005024; Snf7 family
TdChr004.069	61.36	51.87	175.61	137.24	105.6	119.29	143.43	167.59	68.79	230.12	89.37	148.71	141.93	147.18	133.22	113.41	168.48	107.47	101.72	430.95	261.14	59.74	27.53	IPR019034; Uncharacterised protein family UPF0390
TdChr004.048	45.84	62.59	25.96	22.46	66.31	54.87	55.09	51.35	87.02	45.74	53.7	130.27	209.53	292.3	73.44	93.27	151.39	221.56	438.28	50.86	272.46	1.56	103.96	IPR001841; Zinc finger, RING-type IPR013083; Zinc finger, RING/FYVE/PHD-type
TdChr004.042	1362.57	2121.51	3325.48	2017.99	1501.81	1171.13	1467.71	1727.41	454.56	2241.5	529.29	744.38	856.47	1139.64	968.85	664.87	697.98	695.21	423.22	2589.84	1437.48	1346.91	2863.35	IPR000630; Ribosomal protein S8 IPR035987; Ribosomal protein S8 superfamily
TdChr004.018	43.63	70.41	42.69	36.15	31.08	33.49	50.01	63.84	37.02	66.01	37.35	76.77	52.18	50.89	40.97	38.72	70.58	68.12	48.46	72.48	77.64	16.82	36.69	IPR003169; GYF domain IPR035445; GYF-like domain superfamily
TdChr004.010	283.63	261.08	101.68	112.5	131.31	164.28	113.62	72.63	149.24	57.49	86.96	169.31	160.65	124.92	138.1	130.96	196.54	202.09	155.22	59.38	190.71	55.99	106.48	IPR000198; Rho GTPase-activating protein domain
TdChr003.964	1098.65	554.63	12.43	41.6	38.01	8.67	154.86	281.78	1.51	446.06	4.01	4.39	18.32	102.57	21.88	3.96	14.94	18.26	0	607.25	90.91	4.72	37145	IPR003119; Saposin A-type domain
TdChr003.932	275.56	266.5	47.35	48.78	28.96	27.15	21.18	23.5	32.33	27.82	17.01	31.69	27.63	21.05	51.91	25.48	33.25	22.71	20.41	33.75	41.7	55.73	18.98	IPR008506; SRP-independent targeting protein 2/TMEM208
TdChr003.874	347.73	326.61	388.05	665.69	303.27	192.59	297.36	318.83	197.94	209.06	108.29	166.62	121.55	125.22	193.21	136	192.73	157.33	109.6	309.86	209.4	440.37	37.38	IPR009542; Microsomal signal peptidase 12kDa subunit
TdChr003.852	405.95	510.38	190.92	144.13	147.73	134.75	176.95	223.87	77.97	243.59	58.91	129.42	92.27	129.2	124.11	88.9	183.6	74.1	68.2	244.17	93.45	91.83	93.87	IPR001387; Cro/C1-type helix-turn-helix domain IPR010982; Lambda repressor-like, DNA-binding domain superfamily IPR013729; Multiprotein bridging factor 1, N-terminal
TdChr003.851	477.35	486.61	248.32	160.13	151.17	113.7	140.69	147.84	130.1	195.16	81.16	147.56	94.3	121.56	244.86	134.93	163.79	105.82	78.35	223.55	185.1	84.94	139.06	IPR001353; Proteasome, subunit alpha/beta IPR023333; Proteasome B-type subunit IPR029055; Nucleophile aminohydrolases, N-terminal
TdChr003.840	0	0	0.24	0.39	1.34	64.47	104.86	73.01	578.42	9.33	2521.45	400.15	2939.78	516.24	305.85	3245.11	341.25	3437.87	648.49	7.39	4169.1	0	46.39	IPR012674; Calycin IPR022271; Lipocalin, ApoD type
TdChr003.784	8.53	115.13	23.65	54.42	9.52	73.77	57.45	43.14	150.25	37.91	30.58	253.84	132.05	107.23	201.44	31.31	186.18	93.61	102.54	28.27	74.49	20.96	21.27	IPR003010; Carbon-nitrogen hydrolase IPR036526; Carbon-nitrogen hydrolase superfamily
TdChr003.742	828.56	1395.08	17456.9	12096.2	10668.8	5473.94	7912.41	9414.96	2126.99	11096.1	1441.02	2727.47	2505.4	4550.24	3500.28	2049.99	2067.9	1936.99	1611.35	12152.9	5287.71	9604.77	617.35	IPR001569; Ribosomal protein L37e IPR011331; Ribosomal protein L37ae/L37e IPR011332; Zinc-binding ribosomal protein IPR018267; Ribosomal protein L37e, conserved site
TdChr003.737	2342.22	3435.24	4788.77	3260.37	2397.95	1469.89	2209.18	2878.01	457.41	3358.45	515.31	682.56	936.74	1507.47	1060.08	622.62	617.78	618.18	491.38	3620.33	1781.58	2016.21	314.61	IPR001593; Ribosomal protein S3Ae IPR027500; 40S ribosomal protein S1/3, eukaryotes
TdChr003.730	112.51	66.63	33.86	24.19	55.26	61.35	61.81	48.49	52.92	46.09	19.09	70.11	38.74	27.7	75.4	52.32	78.16	47	29.12	59.08	135.45	9.4	78.06	IPR032143; BLOC-1-related complex subunit 7
TdChr003.728	422.19	1120.78	3578.82	2002.06	1529.13	1129.87	1377.64	1654.28	352.09	1926.15	375.96	495.37	637.84	901.11	606.6	431.09	449.79	450.28	267.52	2144.16	1081.11	1229.44	55.04	IPR001515; Ribosomal protein L32e IPR018263; Ribosomal protein L32e, conserved site IPR036351; Ribosomal protein L32e superfamily
TdChr003.701	972.64	2333.55	5200.65	3046.74	2365.06	1423.15	1999.17	2259.83	490.9	2672.56	633.2	882.27	1056.91	1345.53	1262.79	792.99	848.87	761.05	580.85	2964.76	1715.09	1731.06	101.81	IPR000876; Ribosomal protein S4e IPR002942; RNA-binding S4 domain IPR005824; KOW IPR013843; Ribosomal protein S4e, N-terminal IPR013845; Ribosomal protein S4e, central region IPR014722; Ribosomal protein L2, domain 2 IPR018199; Ribosomal protein S4e, N-terminal, conserved site IPR032277; 40S ribosomal protein S4, C-terminal domain IPR038237; Ribosomal protein S4e, central domain superfamily IPR04…
TdChr003.684	227.1	114.68	64.84	43.91	41.91	27.93	56.23	61.87	21.58	60.72	19.59	80.21	21.88	33.99	23.86	26.11	61.97	27.1	24.92	106.11	40.8	16.87	31.1	IPR001611; Leucine-rich repeat IPR032675; Leucine-rich repeat domain superfamily
TdChr003.683	411.71	513.38	474.56	370.43	220.98	305.91	704.67	381.34	309.36	258.24	65.47	98.15	123.54	153.38	99.63	91.5	183.95	167.96	174.42	697.52	366.82	106.84	50.37	IPR008698; NADH:ubiquinone oxidoreductase, B18 subunit
TdChr003.671	22.87	68.64	85.73	116.07	119.99	26.85	16.07	13.98	19.48	20.58	22.73	35.67	34.71	23.21	42.77	24.18	39.87	35.82	27.01	17.33	51.73	10.78	25.14	IPR003726; Homocysteine-binding domain IPR017226; Betaine-homocysteine S-methyltransferase, BHMT IPR036589; Homocysteine-binding domain superfamily
TdChr003.648	755.81	234.53	74.42	52.49	64.83	75.34	188.35	263.66	44.56	281.77	31.25	92.91	76.1	149.03	52.26	45.38	118.59	82.69	72.93	273.43	99.93	13.71	18.14	IPR019331; FAM192A/Fyv6, N-terminal
TdChr003.630	1.06	22.07	59.85	270.43	69.51	23.39	40.01	28.08	113.47	15.69	82.84	66.72	54.59	71.53	88.19	64.08	52.94	62.59	84.09	30.8	97	5.78	106.65	IPR003010; Carbon-nitrogen hydrolase IPR036526; Carbon-nitrogen hydrolase superfamily
TdChr003.606	29.34	40.49	19.86	24.92	37.3	29.19	41.64	42.7	42.58	47.34	15.32	53.99	38.19	47.8	36.2	17.56	53.21	39.5	54	60.76	57.96	37.24	17.37	IPR001110; Uncharacterised protein family UPF0012, conserved site IPR003010; Carbon-nitrogen hydrolase IPR036526; Carbon-nitrogen hydrolase superfamily
TdChr003.605	437.5	288.71	95.7	108.11	71.92	84.54	85.36	82.58	99.03	124.33	113.59	104.03	78.91	89.54	147.67	187.02	121.72	108.47	75.28	103.06	93.51	48.01	73.29	IPR002809; Integral membrane protein EMC3/TMCO1-like IPR008568; ER membrane protein complex subunit 3
TdChr003.555	1.91	40.31	19.43	26.9	45.64	34.31	51.56	16.01	89.03	0.64	6.15	31	14.27	14.23	3.28	0.42	2.14	0.62	13.5	2.31	2.35	1.25	1891.51	IPR000402; Sodium/potassium-transporting ATPase subunit beta IPR000560; Histidine phosphatase superfamily, clade-2 IPR029033; Histidine phosphatase superfamily IPR038702; Sodium/potassium-transporting ATPase subunit beta superfamily
TdChr003.535	59.52	104.76	107.44	136.12	190.35	119.52	127.92	120.74	145.27	127.33	99.15	161.54	126.98	86.68	235.32	195.43	193.07	141.05	97.07	162.56	231.3	75.82	262.93	IPR009703; Selenoprotein S
TdChr003.534	31.44	122.29	113.62	90.92	55.82	250.65	257.71	97.59	228.22	67.93	57.84	121.25	159.14	816.89	65.01	65.26	125.04	155.87	1143.94	83.08	338.25	44.08	53.73	IPR000701; Succinate dehydrogenase/fumarate reductase type B, transmembrane subunit IPR014314; Succinate dehydrogenase, cytochrome b556 subunit IPR018495; Succinate dehydrogenase, cytochrome b subunit, conserved site IPR034804; Fumarate reductase/succinate dehydrogenase, transmembrane subunit
TdChr003.530	1658.34	869.87	301.83	151.14	170.12	134.7	189.74	258.08	21.39	420.07	45.38	33.14	49.04	112.26	64.14	31.84	76.25	78.94	48.84	406.97	83.55	56.81	42	IPR000626; Ubiquitin-like domain IPR022617; Rad60/SUMO-like domain IPR029071; Ubiquitin-like domain superfamily
TdChr003.515	0	0	0	0	0	3.81	25.03	35.24	0.11	17.87	0.14	0	3.9	4.47	2.71	0.15	0	1.8	0	2.43	581.71	0	32021.2	IPR013201; Cathepsin propeptide inhibitor domain (I29) IPR038765; Papain-like cysteine peptidase superfamily
TdChr003.512	10.27	23.34	17.46	106.79	74.51	28.86	26.92	20.79	27.03	27.72	20.4	39.81	21.11	18.56	56.47	23.75	39.64	23.3	18.87	30.98	25.98	2.18	17.92	IPR000246; Peptidase T2, asparaginase 2 IPR029055; Nucleophile aminohydrolases, N-terminal
TdChr003.467	667.75	319.14	116.32	75.07	122.54	71.28	296.05	472.32	41.42	792.61	36.25	46.86	92.92	266.88	59.6	74.6	51.27	57.62	47.38	625.45	53.91	27.55	22.24	IPR006941; Ribonuclease CAF1 IPR012337; Ribonuclease H-like superfamily IPR036397; Ribonuclease H superfamily
TdChr003.386	1161.67	2164.6	3155.7	1887.51	1499.49	1093.1	1250.9	1513.25	429.52	2081.53	514.76	812.17	913.19	1094.52	1118.62	666.85	784.66	708.33	532.22	2001.07	1549.2	1189.22	744.9	IPR001351; Ribosomal protein S3, C-terminal IPR004044; K Homology domain, type 2 IPR005703; Ribosomal protein S3, eukaryotic/archaeal IPR009019; K homology domain superfamily, prokaryotic type IPR015946; K homology domain-like, alpha/beta IPR036419; Ribosomal protein S3, C-terminal domain superfamily
TdChr003.376	916.74	1406.71	4514.82	3028.2	2198.31	2265.32	1826.65	2276.86	511.15	3750.1	759.9	1177.14	1341.65	2071.44	1507.67	960.18	1071.65	979.74	782.11	3116.93	1745.92	2577.91	49.99	IPR000988; Ribosomal protein L24e-related IPR011017; TRASH domain IPR038630; Ribosomal protein L24e/L24 superfamily
TdChr003.343	122.64	228.76	166.31	60.72	65.11	55.34	96.23	119.67	20.95	221.47	14.87	28.39	47.94	115.6	44.91	45	37.79	55.15	38.24	178.4	55.44	25.66	31.94	IPR007515; Mss4 IPR011057; Mss4-like superfamily IPR011323; Mss4/translationally controlled tumour-associated TCTP
TdChr003.339	58.18	158.52	163.87	221.23	266.28	156.23	143.66	97.63	301.06	76.36	144.62	233.01	249.44	167.3	268.42	242.13	249.54	234.18	306.66	124.05	402.2	96.27	20.68	IPR024491; Selenoprotein SelK/SelG
TdChr003.2389	308.58	1570.89	444.98	521.12	567.8	331.34	790.19	301.07	745.15	197.06	180.03	408.77	373.46	259.77	461.74	182.96	439.57	341.88	262.86	309.01	741.05	440.93	60.87	IPR000557; Calponin repeat IPR001715; Calponin homology domain IPR003096; Smooth muscle protein/calponin IPR036872; CH domain superfamily
TdChr003.2388	972.04	1719.77	3851.52	2570.14	2012.06	1174.4	1964.47	2424.05	493.59	2480.46	461.01	660.3	828.67	1163.12	1101.53	610.79	586.07	628.75	457.15	2489.25	1307.78	1598.22	97.19	IPR005755; Ribosomal protein L13, eukaryotic/archaeal IPR005822; Ribosomal protein L13 IPR023563; Ribosomal protein L13, conserved site IPR036899; Ribosomal protein L13 superfamily
TdChr003.2334	540.32	116.35	32.97	40.2	56.61	40.46	40.22	44.12	53.99	59.25	39.58	61.12	53.64	40.79	69.74	61.29	58.59	51.4	47.93	38.42	46.61	5.64	23.26	IPR012317; Poly(ADP-ribose) polymerase, catalytic domain IPR041400; PARP16 N-terminal domain
TdChr003.2219	203.59	90.99	37.09	41.94	27.99	18.16	47.75	77.24	16.2	104.24	18.74	46.29	31.49	47.59	24.85	31.72	37.57	27.27	19.67	93.84	25.73	18.9	33.36	IPR000742; EGF-like domain IPR002049; Laminin EGF domain IPR006212; Furin-like repeat IPR009030; Growth factor receptor cysteine-rich domain superfamily IPR013032; EGF-like, conserved site IPR018097; EGF-like calcium-binding, conserved site
TdChr003.2195	20.08	36.47	14.78	25.64	23.24	20.88	22.41	24.15	35.09	24.94	32.06	43.97	29.27	34.02	30.51	25.22	30.63	29.08	39.22	33.63	28.26	51.34	16.77	IPR007266; Endoplasmic reticulum oxidoreductin 1 IPR037192; ERO1-like superfamily
TdChr003.2193	661.93	1280.4	2172.95	1741.89	1256.62	1915.13	4212.35	1376.29	2980.31	982.64	469.88	1305.97	1369.86	2209.34	729.74	775.56	1755.72	1478.36	2461.28	1979.62	2944.83	605.43	219.5	IPR004205; Cytochrome b-c1 complex subunit 8 IPR036642; Cytochrome b-c1 complex subunit 8 superfamily
TdChr003.2188	74.91	51.78	27.24	22.14	43.61	25.33	56.15	71.13	47	71.35	35.12	54.87	62	53.17	42.04	41.8	57.44	71.46	54.57	102.64	104.6	8.21	17.85	IPR001810; F-box domain IPR007397; F-box associated (FBA) domain IPR008979; Galactose-binding-like domain superfamily IPR036047; F-box-like domain superfamily
TdChr003.2187	2448.13	3910.07	3827.95	2225.82	1606.78	1125.73	1567.61	1928.37	327.19	2202.55	314.31	421.12	547.99	865.39	634.66	427.62	400.66	413.48	292.08	2797.97	871.11	1341.55	17.03	IPR021138; 60S ribosomal protein L18a/ L20, eukaryotes IPR023573; Ribosomal protein 50S-L18Ae/60S-L20/60S-L18A IPR028877; 50S ribosomal protein L18Ae/60S ribosomal protein L20 and L18a
TdChr003.2166	210.46	341.96	93.29	100.89	64.67	33.23	82.26	123.6	55.19	158.46	45.41	79.48	58.06	93.08	68.24	55.18	74.89	54	73.21	139.91	47.42	43.1	28.14	IPR002048; EF-hand domain IPR011992; EF-hand domain pair IPR018247; EF-Hand 1, calcium-binding site
TdChr003.2164	91.36	85.12	51.56	46.63	44.72	32.78	49.58	59.76	32.92	62.97	24.7	41.85	28.1	38.66	30.29	36.44	69.22	27.9	22.14	96.27	31	29.17	37.89	IPR001173; Glycosyltransferase 2-like IPR029044; Nucleotide-diphospho-sugar transferases IPR035518; Dolichyl-phosphate beta-glucosyltransferase
TdChr003.2110	40.99	46.43	12.6	12.1	7.88	17.01	37.32	46.17	13.1	63.79	10.17	22.47	16.61	41.86	12.2	13.28	22.69	16.63	25.48	121.07	47.14	16.89	18.01	IPR001623; DnaJ domain IPR004640; Co-chaperone Hsc20 IPR009073; Co-chaperone HscB, C-terminal oligomerisation domain IPR036386; HscB, C-terminal domain superfamily IPR036869; Chaperone J-domain superfamily
TdChr003.2091	1139.17	525.5	918.28	1135.41	640.04	222.44	527.81	715.12	154.95	887.3	138.71	138.04	163.08	382.21	204.98	174.64	169.63	125.79	111.08	658.8	93.84	390.77	511.47	IPR005788; Disulphide isomerase IPR005792; Protein disulphide isomerase IPR013766; Thioredoxin domain IPR017937; Thioredoxin, conserved site IPR036249; Thioredoxin-like superfamily
TdChr003.206	331.84	412.11	583.31	361.51	201.75	128.11	257.03	339.97	71.89	344.44	61.5	101.73	96.82	145.1	94.37	73.03	106.52	84.8	82.06	430.75	120.66	129.92	33.34	IPR001680; WD40 repeat IPR015943; WD40/YVTN repeat-like-containing domain superfamily IPR017986; WD40-repeat-containing domain IPR019775; WD40 repeat, conserved site IPR020472; G-protein beta WD-40 repeat IPR027525; Eukaryotic translation initiation factor 3 subunit I IPR036322; WD40-repeat-containing domain superfamily
TdChr003.1980	374.31	308.05	371.61	225.57	136.77	111.44	170.11	218.01	53.86	275.01	47.01	100.21	86.83	127.67	77.93	66.4	109.97	79.39	63.6	263.03	113.48	95.16	30.58	IPR000555; JAB1/MPN/MOV34 metalloenzyme domain IPR027524; Eukaryotic translation initiation factor 3 subunit H IPR037518; MPN domain
TdChr003.1970	0	0	0	0.03	0	0.53	21.07	32.42	0	8.54	0.14	0	2.43	3.2	0.04	0.07	0	0.2	0	1.29	21.3	0	7603.92	IPR036716; Pesticidal crystal protein, N-terminal domain superfamily
TdChr003.1969	0	0.09	0	0	0.04	0.13	16.96	23.75	0	4.94	0	0	0.93	1.96	0	0	0	0.26	0	0.47	6.95	0	3254	IPR036716; Pesticidal crystal protein, N-terminal domain superfamily
TdChr003.1919	0	0	0	0.08	0.24	1.16	13.57	4.24	36.96	1.87	52.03	11.5	125.55	13.23	226.89	156.78	17.23	322.7	50.84	0.05	16.02	0	397.59	IPR011042; Six-bladed beta-propeller, TolB-like IPR011047; Quinoprotein alcohol dehydrogenase-like superfamily IPR017996; Major royal jelly protein/protein yellow
TdChr003.1917	0	0	0	0	0	0.71	16.37	22.72	0	5.98	0.13	0	1.17	1.83	0.21	0.09	0	0.55	0	0.6	14.7	0	2799.68	IPR024079; Metallopeptidase, catalytic domain superfamily IPR041645; ADAM cysteine-rich domain 2
TdChr003.1916	0	0	0	0	0	0.54	24.2	39.28	0	10.54	0.29	0	3.86	3.75	0	0	0	1.71	0.13	1.04	32.77	0	11461.8	IPR024079; Metallopeptidase, catalytic domain superfamily IPR041645; ADAM cysteine-rich domain 2
TdChr003.1910	271.68	305.76	176.14	102.31	73.96	58.48	80.69	94.8	28.2	94.32	28.05	33.42	50.45	49.29	42.05	43.1	36.33	46.94	25.61	134.02	43.48	37.63	54.34	IPR002478; PUA domain IPR004521; Uncharacterised domain CHP00451 IPR015947; PUA-like superfamily IPR016437; MCT-1/Tma20 IPR036974; PUA domain superfamily IPR041366; Pre-PUA domain
TdChr003.1897	188.37	222.28	100.6	83.51	59.94	50.62	86.81	117.48	59.19	160.38	40.33	126.1	57.55	84.17	71.74	53.36	131.76	73.84	73.29	256.89	96.88	19.47	21.54	IPR000086; NUDIX hydrolase domain IPR003565; Bis(5'-nucleosyl)-tetraphosphatase IPR015797; NUDIX hydrolase-like domain superfamily IPR020084; NUDIX hydrolase, conserved site
TdChr003.1895	85.51	182.96	43.99	44.7	45.34	36.9	58.28	66.42	31.27	83.5	21.98	40.48	36.94	36.21	43.51	36.66	49.56	38.65	24.16	73.83	44.55	18.86	17.74	IPR007829; TM2 domain
TdChr003.1861	151.87	187.42	150.02	137.55	68.79	52.59	108.43	117.41	58.26	125.82	37.06	48.29	50.13	69.62	72.67	61.17	51.5	44.71	47.19	173.27	40.58	79.82	63.64	IPR001179; FKBP-type peptidyl-prolyl cis-trans isomerase domain IPR011990; Tetratricopeptide-like helical domain superfamily IPR013026; Tetratricopeptide repeat-containing domain IPR019734; Tetratricopeptide repeat
TdChr003.1843	163.94	206.98	70.26	84.91	124.08	88.92	59.57	47.1	60.05	58.43	66.4	93.68	88.19	80.46	138.56	96.7	129.26	116.68	70.46	38.45	100.51	34.01	150.11	IPR004942; Roadblock/LAMTOR2 domain
TdChr003.1692	3.68	30.06	38.53	124.57	202.24	56.42	175.77	64.07	305	36.2	102.5	96.87	126.14	56.17	544.56	118.61	87.55	149.26	64.09	19.42	158.45	51.27	47.53	IPR029069; HotDog domain superfamily
TdChr003.1651	0.16	0	0.08	0.24	113	12.52	108.86	73.43	419.64	27.56	205.44	114.59	166.69	216.23	935.31	86.55	73.57	107.23	201.01	8.96	942.63	0.33	36.9	IPR001128; Cytochrome P450 IPR002401; Cytochrome P450, E-class, group I IPR017972; Cytochrome P450, conserved site IPR036396; Cytochrome P450 superfamily
TdChr003.1639	0	0	0.02	0	0	1.12	32.5	49.54	2	12.9	0.11	0.08	2.51	3.22	3.8	0	0.24	0.86	0	1.69	33.28	0	21712.2	IPR001604; DNA/RNA non-specific endonuclease
TdChr003.1632	1607.52	1277.96	1266.05	1406.24	1046.4	727.92	1520.51	1595.88	900.38	1026.63	335.02	512.33	442.9	533.19	843.2	418.86	639.33	298.64	313.7	1866.43	669.61	483.16	537.99	IPR007834; DSS1/SEM1
TdChr003.1627	117.52	202.25	64.35	65.93	60.83	44.42	53.6	57.42	35.83	71.7	24.24	59.94	33.39	46.93	46.75	35.41	65.26	40.12	48.59	89.56	50.93	33.53	17.73	IPR001392; Clathrin adaptor, mu subunit IPR011012; Longin-like domain superfamily IPR018240; Clathrin adaptor, mu subunit, conserved site IPR022775; AP complex, mu/sigma subunit IPR028565; Mu homology domain IPR036168; AP-2 complex subunit mu, C-terminal superfamily
TdChr003.1566	11.83	127.02	63.9	97.86	77.36	29.38	37.41	21.29	156.64	10.05	80.22	69.45	97.59	80.47	434.76	153.3	76.8	129.08	110.59	4.62	253.35	57.26	704.34	IPR000301; Tetraspanin IPR008952; Tetraspanin, EC2 domain superfamily IPR018499; Tetraspanin/Peripherin
TdChr003.1523	520.53	378	2368.38	1887.29	2156.21	1326.11	819.64	775.27	997.25	697.41	2702.07	1140.32	277.51	523.62	982.66	443.95	1411.89	313.83	400.54	752.4	352.11	1278.16	743.4	IPR002130; Cyclophilin-type peptidyl-prolyl cis-trans isomerase domain IPR020892; Cyclophilin-type peptidyl-prolyl cis-trans isomerase, conserved site IPR024936; Cyclophilin-type peptidyl-prolyl cis-trans isomerase IPR029000; Cyclophilin-like domain superfamily
TdChr003.148	140.52	246.16	403.57	362.53	244.72	137.74	171.39	158.58	117.58	152.63	91.68	173.61	111.91	108.49	165.84	138.43	166.44	115.08	75.8	205.47	260	124.01	21.83	IPR008914; Phosphatidylethanolamine-binding protein IPR035810; Phosphatidylethanolamine-binding protein, eukaryotic IPR036610; PEBP-like superfamily
TdChr003.1468	225.84	304.06	155.27	152.1	48.62	52.67	56.58	51.6	37.1	63.07	33.44	46.64	46.8	41.67	59.53	43.68	53.24	50.87	29.94	94.03	75.99	130.71	48.42	IPR018170; Aldo/keto reductase, conserved site IPR020471; Aldo/keto reductase IPR023210; NADP-dependent oxidoreductase domain IPR036812; NADP-dependent oxidoreductase domain superfamily
TdChr003.1466	810.77	916.42	644.57	408.98	336.04	224.33	323.4	352.74	179.88	490.63	132.76	184.99	145.24	237.15	382.25	225.73	240.87	141.49	98.6	372.19	195.57	183.36	82.71	IPR000426; Proteasome alpha-subunit, N-terminal domain IPR001353; Proteasome, subunit alpha/beta IPR023332; Proteasome alpha-type subunit IPR029055; Nucleophile aminohydrolases, N-terminal IPR034642; Proteasome subunit alpha6
TdChr003.1453	675.73	249.38	476.31	955.45	249.52	129.15	471.14	614.08	108.21	547.17	70.3	69.77	78.26	221.6	130.94	142.93	84.02	86.63	63.22	590.23	30.27	320.04	101.92	IPR001404; Heat shock protein Hsp90 family IPR003594; Histidine kinase/HSP90-like ATPase IPR019805; Heat shock protein Hsp90, conserved site IPR020568; Ribosomal protein S5 domain 2-type fold IPR020575; Heat shock protein Hsp90, N-terminal IPR036890; Histidine kinase/HSP90-like ATPase superfamily IPR037196; HSP90, C-terminal domain
TdChr003.1436	186.99	113.77	115.32	116.09	78.81	57.26	123.9	88.79	100.4	61.13	52.14	99.03	45.21	59.41	31.94	55.43	55.04	32.34	49.56	84.17	13.2	59.62	20.88	IPR001666; Phosphatidylinositol transfer protein IPR023393; START-like domain superfamily
TdChr003.1434	291.92	263.3	176.59	121.21	80.57	172.28	173.07	170.28	45.98	194.97	36.28	83.75	83.94	126.07	64.42	49.22	105.73	63.08	82.03	201.28	103.65	72.23	38.48	IPR000511; Cytochrome c/c1 haem-lyase
TdChr003.1431	139.55	426.21	119.71	142.65	241.92	236.49	124.06	85.74	180.08	88.38	180.34	321.8	224.58	172.65	201.66	205.8	360.16	247.72	205.96	83.14	312.14	50.12	64.3	IPR008547; Protein of unknown function DUF829, TMEM53 IPR029058; Alpha/Beta hydrolase fold
TdChr003.1430	83.39	112.5	61.3	62.3	76.73	77.46	87.75	112.69	45.16	95.67	23.79	53.35	49.48	57.31	42.99	44.86	78.98	71.38	71.2	165.19	79.59	16.99	45.55	IPR018737; Protein LIN52
TdChr003.1405	13.2	31.96	19.88	22.48	26.15	45.68	20.24	8.5	25.39	9	34.75	59.83	54.18	47.1	31.41	44.09	53.06	57.94	55.84	10.17	93.25	12.54	31.08	IPR017920; COMM domain
TdChr003.1377	38.99	85.8	38.18	51.23	71.97	40.19	73.92	85.66	59.7	72.75	35.11	85.24	55.08	61.54	63.6	55.11	90.37	61.09	49.54	70.79	55.31	33.89	31.06	IPR002931; Transglutaminase-like IPR006588; Peptide N glycanase, PAW domain IPR008979; Galactose-binding-like domain superfamily IPR018325; Rad4/PNGase transglutaminase-like fold IPR038680; PAW domain superfamily IPR038765; Papain-like cysteine peptidase superfamily
TdChr003.1376	520.41	934.86	377.34	414.92	347.82	693.31	1038.54	412.89	834.53	346.05	224.02	661.51	727.92	4120.2	284.88	235.88	780.74	753.53	5831.85	269.38	1440.62	393.42	51.51	IPR001236; Lactate/malate dehydrogenase, N-terminal IPR001252; Malate dehydrogenase, active site IPR001557; L-lactate/malate dehydrogenase IPR010097; Malate dehydrogenase, type 1 IPR015955; Lactate dehydrogenase/glycoside hydrolase, family 4, C-terminal IPR022383; Lactate/malate dehydrogenase, C-terminal IPR036291; NAD(P)-binding domain superfamily
TdChr003.1360	407.49	356.54	200.1	161.01	193.18	132.5	248.31	261.94	120.06	236.25	77.09	150.94	194.31	188.34	122.08	151.29	184.05	226.46	173.56	281.87	243.04	57.29	33.83	IPR007758; Nucleoporin, NSP1-like, C-terminal
TdChr003.1354	172.66	288.69	192.73	234.72	246.43	150.2	166.38	145.21	176.57	144.02	95.64	268.15	141.13	183.72	168.89	125.19	289.32	153.17	238.12	111.69	157.77	148.59	26.4	IPR000806; Rab GDI protein IPR018203; GDP dissociation inhibitor IPR036188; FAD/NAD(P)-binding domain superfamily
TdChr003.133	175.59	76.4	57.03	55.84	24.08	25.85	30.82	35.85	17.36	59.63	21.85	14.13	17.51	30.74	22.54	18.14	18.3	12.13	13.36	74.29	12.34	55.4	31.62	IPR007305; Vesicle transport protein, Got1/SFT2-like
TdChr003.1329	490.7	514.69	147.42	165.73	163.39	163.62	174.08	189.33	94.48	251.25	65.64	239.53	81.77	132.87	79.32	91.35	237.38	80.28	91.57	183.79	68.15	100.92	49.32	IPR000308; 14-3-3 protein IPR023409; 14-3-3 protein, conserved site IPR023410; 14-3-3 domain IPR036815; 14-3-3 domain superfamily
TdChr003.1322	1307.4	724.97	580.63	721.24	308.63	291.26	282.82	304.33	208.84	454.92	417.38	274.9	262.84	288.86	404.87	563.04	317.9	296.08	230.07	378.44	296.34	548.11	1152.29	IPR002208; SecY/SEC61-alpha family IPR019561; Translocon Sec61/SecY, plug domain IPR023201; SecY domain superfamily IPR030659; SecY conserved site
TdChr003.1318	135.74	165.35	125.25	112.51	122.12	82.92	120.98	123.82	59.27	93.74	38.83	131.37	71.83	85.7	66.71	53.24	123	71.68	72.46	64.6	56.58	36.39	25.26	IPR003175; Cyclin-dependent kinase inhibitor
TdChr003.1314	414.4	331.25	92.74	102.38	104.28	87.28	150.88	153.81	103.75	128.57	50.54	113.24	82.49	113.28	58.83	57.47	115.93	89.5	86.09	161.8	144.86	31.62	76.7	IPR013855; Cdc37, N-terminal domain IPR013873; Cdc37, C-terminal IPR013874; Cdc37, Hsp90 binding IPR038189; Cdc37, Hsp90-binding domain superfamily
TdChr003.1291	73.43	106.18	44.37	54.6	47.18	63.84	60.35	68.76	54.38	69.09	51.13	99.01	76.07	65.28	92.79	71.94	93.35	77.28	85.03	63.26	102.34	42.08	45.58	IPR018108; Mitochondrial substrate/solute carrier IPR023395; Mitochondrial carrier domain superfamily
TdChr003.1282	162.25	99.86	64.44	81.79	197.25	177.27	176.89	115.81	288.23	82.21	147.56	348.21	228.5	215.54	155.98	215.07	321.4	217.45	266.2	68.62	226.03	3.29	62.9	IPR003599; Immunoglobulin subtype IPR007110; Immunoglobulin-like domain IPR013151; Immunoglobulin IPR013783; Immunoglobulin-like fold IPR036179; Immunoglobulin-like domain superfamily
TdChr003.1263	425.83	575.57	263.51	224.33	257.36	388.73	443.85	226.54	216.15	277.81	127.24	341.39	245.06	292.19	142.16	171.59	391.78	233.09	273.5	418.91	394.94	76.35	146.5	IPR008699; NADH dehydrogenase [ubiquinone] 1 beta subcomplex subunit 8
TdChr003.1074	575.79	740.97	588.12	350.72	284.32	207	367.35	448.74	92.33	468.18	81.35	149.79	138.42	226.38	97.53	97.4	137.04	110.02	92.46	370.58	159.95	100.18	16.66	IPR002194; Chaperonin TCP-1, conserved site IPR002423; Chaperonin Cpn60/TCP-1 family IPR012722; T-complex protein 1, zeta subunit IPR017998; Chaperone tailless complex polypeptide 1 (TCP-1) IPR027409; GroEL-like apical domain superfamily IPR027410; TCP-1-like chaperonin intermediate domain superfamily IPR027413; GroEL-like equatorial domain superfamily
TdChr003.1017	167.51	161.12	77.79	44.37	42.74	48.34	87.9	116.73	27.46	124.8	25.87	55.74	82.76	115.75	32.01	32.59	46.22	76.84	84.26	178.72	87.97	26.84	20.57	IPR012340; Nucleic acid-binding, OB-fold
TdChr003.1003	106.53	134.83	87.39	73.81	126.54	57.9	125.16	155.93	77.68	188.15	70.31	140.09	92.02	124.44	84.27	89.33	108.33	92.05	113.61	208.41	123.92	24.36	40.56	IPR007317; Golgi to ER traffic protein 4 IPR011990; Tetratricopeptide-like helical domain superfamily
TdChr003.096	762.12	503.74	929.95	756.44	669.13	587.21	436.36	275.67	345.26	90.81	160.22	249.45	313.47	195.05	443.52	342.21	422.52	452.07	328.53	335.19	338.91	308.89	156.55	IPR007808; Transcription elongation factor 1 IPR038567; Transcription elongation factor 1 superfamily
TdChr003.065	70.58	110.71	51.28	62.19	94.4	65.45	91.98	82.44	136.89	86.43	90.64	195.23	132.83	130.47	105.76	138.49	243.04	178.54	162.35	89.94	213.7	21.46	163.03	IPR008853; TMEM9
TdChr003.061	0.14	7.02	1.77	4.57	33.94	11.22	22.86	20.36	120.11	9.22	41.94	45.85	68.73	78.78	258.04	109.33	47.23	113.11	101.14	0.67	49.93	44.44	73.12	IPR000169; Cysteine peptidase, cysteine active site IPR000668; Peptidase C1A, papain C-terminal IPR013201; Cathepsin propeptide inhibitor domain (I29) IPR025660; Cysteine peptidase, histidine active site IPR025661; Cysteine peptidase, asparagine active site IPR038765; Papain-like cysteine peptidase superfamily IPR039417; Papain-like cysteine endopeptidase
TdChr003.042	433.58	327.39	153.93	131.79	127.13	85.38	140.78	174.23	118.87	279	320.64	140.9	117.84	180.98	164.54	417.53	142.55	113.3	104.34	244.96	114.92	85.16	36.44	IPR005344; TMEM33/Pom33 family
TdChr002.998	155.76	167.88	163.03	90.39	240.86	355.61	227.57	166.92	275.02	106.22	136.12	367.45	224.36	421.36	283.57	236.61	411	298.27	323.28	263.81	348.87	71.11	19.62	IPR018625; Protein Pet100
TdChr002.948	35.25	36.73	9.9	10.97	16.82	24.11	87.27	132.61	21	175.81	18.53	29.78	35.66	88.48	25.02	21.83	24.97	27.31	48.65	166.66	43.27	8.02	28.64	IPR016024; Armadillo-type fold
TdChr002.884	1057.81	2108.07	4077.51	2457.87	1598.42	929.13	1900.87	2177.18	403.86	2134.59	335.96	526.07	585.48	988.17	625.83	401.32	498.37	450.95	320.99	4227.6	1274.32	1198.65	2749.33	IPR005756; Ribosomal protein L26/L24, eukaryotic/archaeal IPR005824; KOW IPR005825; Ribosomal protein L24/L26, conserved site IPR008991; Translation protein SH3-like domain superfamily IPR014722; Ribosomal protein L2, domain 2 IPR041988; Ribosomal Protein L26/L24, KOW domain
TdChr002.872	257.08	359.88	160.59	242.46	175.74	72.2	166.15	143.79	210.13	118.5	102.8	116.57	121.15	129.69	120.6	126.38	93.02	111.17	122.39	156.86	120.4	135.16	51.41	IPR040463; BAP29/BAP31, transmembrane domain IPR041672; Bap31/Bap29 cytoplasmic coiled-coil domain
TdChr002.857	20.71	25.45	10.57	10.47	10.85	20.94	11.55	3.22	23.62	38.42	18.46	61.4	13.89	124.14	39.65	22.48	40.47	35.23	140.06	9.58	5.94	0	46.29	IPR008011; Complex 1 LYR protein
TdChr002.855	504.91	864.4	870.36	356.72	179.03	124.97	544.6	929.12	53.85	1182.96	58.3	105.77	138.42	439.22	80.79	52.21	93.9	63.08	46.13	1114.72	99.78	101.77	22.95	IPR002164; Nucleosome assembly protein (NAP) IPR037231; NAP-like superfamily
TdChr002.828	488.06	1628.97	1736.35	1926.71	851.96	357.17	251.58	242.62	264.59	237.33	103.4	100.4	206.23	133.79	1179.13	80.22	93.11	130	39.3	241.01	94.58	332.71	108.86	IPR004045; Glutathione S-transferase, N-terminal IPR004046; Glutathione S-transferase, C-terminal IPR010987; Glutathione S-transferase, C-terminal-like IPR036249; Thioredoxin-like superfamily IPR036282; Glutathione S-transferase, C-terminal domain superfamily
TdChr002.825	1.73	125.26	431.09	845.88	246.36	292.09	233.43	127.81	818.04	40.17	1026.36	484.46	1181.22	199.13	1089.51	1306.28	453.79	1031.81	164.16	7.88	1184.26	440.12	131.11	IPR004045; Glutathione S-transferase, N-terminal IPR004046; Glutathione S-transferase, C-terminal IPR010987; Glutathione S-transferase, C-terminal-like IPR036249; Thioredoxin-like superfamily IPR036282; Glutathione S-transferase, C-terminal domain superfamily IPR040079; Glutathione Transferase family
TdChr002.820	25.59	28.33	8.07	6.97	11.62	113	117.3	128.16	232.75	126.16	48.4	447.04	66.86	58.29	64.95	8.75	482.46	62.07	25.71	116.54	23.01	320.25	25.15	IPR004045; Glutathione S-transferase, N-terminal IPR004046; Glutathione S-transferase, C-terminal IPR010987; Glutathione S-transferase, C-terminal-like IPR036249; Thioredoxin-like superfamily IPR036282; Glutathione S-transferase, C-terminal domain superfamily IPR040079; Glutathione Transferase family
TdChr002.798	375.11	433.87	79.09	74.86	51.01	176.46	164.84	60.56	89.63	98.15	84.6	107.76	135.18	145.87	91.2	94.78	138.18	142.58	148.47	61.66	196.61	44.15	201.77	IPR008011; Complex 1 LYR protein
TdChr002.711	161.8	355.61	632.23	332.49	231.25	263.89	263.49	285.65	98.23	338.14	113.17	172.85	190.25	195.93	318.76	168.33	169.41	154.87	109.52	382.64	400.7	272.06	21.65	IPR000439; Ribosomal protein L15e IPR012678; Ribosomal protein L23/L15e core domain superfamily IPR020925; Ribosomal protein L15e, conserved site IPR024794; Ribosomal protein L15e core domain superfamily
TdChr002.685	11.13	19.25	17.91	28.85	28.06	19.9	17.8	16.04	31.2	15.38	21.46	30.22	29.93	26.1	39.54	35.39	31.5	34.7	32.85	24.31	44.19	12.27	18.43	IPR000488; Death domain IPR011029; Death-like domain superfamily
TdChr002.683	76.4	93.42	34.56	93.86	85.18	49.61	103.29	136.25	60.42	135.24	34.58	75.66	56.43	89.07	49.6	43.27	80.37	62.3	84.53	186.35	59.87	25.71	37.91	IPR000727; Target SNARE coiled-coil homology domain
TdChr002.677	679.64	645.29	561.07	663.95	323.53	363.84	1045.48	463.99	979.74	350.01	217.73	869.03	601.22	1220.91	428.9	330.17	866.74	605.52	1765.67	325.8	581.36	202.54	27.64	IPR000941; Enolase IPR020809; Enolase, conserved site IPR020810; Enolase, C-terminal TIM barrel domain IPR020811; Enolase, N-terminal IPR029017; Enolase-like, N-terminal IPR036849; Enolase-like, C-terminal domain superfamily
TdChr002.643	243.58	389.78	175.75	100.92	124.23	90.25	113.25	106.93	51.01	113.02	27.35	74.63	59.51	59.15	54.18	41.98	96.41	58.72	46.99	168.26	67.82	27.47	54.92	IPR005813; Ribosomal protein L20 IPR035566; Ribosomal protein L20, C-terminal
TdChr002.642	412.98	761.35	325.18	511.13	259.18	265.88	795.75	313.45	831.9	153.76	191.33	668.78	585.35	885.02	352.03	250.38	672.93	626.02	1181.17	184.83	868.43	142.47	89.02	IPR000652; Triosephosphate isomerase IPR013785; Aldolase-type TIM barrel IPR020861; Triosephosphate isomerase, active site IPR022896; Triosephosphate isomerase, bacterial/eukaryotic IPR035990; Triosephosphate isomerase superfamily
TdChr002.640	762.13	850.12	731.04	362.97	219.48	292.23	348.5	507.26	56.87	481.42	42.23	95.45	82.63	192.05	99.38	62.11	105.64	63.16	51.67	810.57	173.14	98.51	25.81	IPR003428; Mitochondrial glycoprotein IPR036561; Mitochondrial glycoprotein superfamily
TdChr002.631	263.35	174.88	80.66	195.72	344.78	349.35	468.61	416.37	793.56	231.04	462.46	931.32	917.12	560.93	1116.39	1010.45	1226.67	1153.11	759.05	239.28	629.25	41.86	27.67	IPR020309; Uncharacterised protein family, CD034/YQF4
TdChr002.628	283.36	138.54	32.77	25.33	35.45	28.85	63.22	98.95	17.2	140.54	14.47	34.51	28.55	65.49	25.35	24.58	37.74	23.48	21.33	160.09	26.32	16.53	17.5	IPR009244; Mediator complex, subunit Med7 IPR037212; Mediator complex, subunit Med7/Med21-like
TdChr002.613	340.04	467.82	326.89	215.78	206.11	150.4	205.16	244.55	142.7	390.69	109.21	161.47	139.45	211.25	274.04	161.9	178.3	135.28	86.4	258.16	187.99	111.44	305.36	IPR008012; Proteasome maturation factor Ump1
TdChr002.612	95.64	65.14	31.54	29.2	5.15	72.79	224.36	79.62	474.68	54.9	11.41	242.84	58	106.64	1207.31	14.26	220.69	86.25	131.2	38.27	247.57	33.35	418.61	IPR017580; 2-oxo-4-hydroxy-4-carboxy-5-ureidoimidazoline decarboxylase, type 1 IPR018020; Oxo-4-hydroxy-4-carboxy-5-ureidoimidazoline decarboxylase IPR036778; Oxo-4-hydroxy-4-carboxy-5-ureidoimidazoline decarboxylase superfamily
TdChr002.580	246.07	285.28	162.74	230.42	97.19	63.1	143.15	176.96	79.97	217.3	28.38	30.77	47.72	87.85	104.31	90.56	63.64	90.97	36.13	319.61	63.23	223.76	137.63	IPR021852; Domain of unknown function DUF3456
TdChr002.519	106.42	111.09	42.59	48.61	60.99	37.14	51.45	61.51	65.44	57.14	33.81	74.68	98.91	89.04	58.2	51.42	64.27	93.07	110.87	61.86	61.49	31.58	16.88	IPR005024; Snf7 family
TdChr002.510	5251.18	4194.3	2346.75	1875.01	1258.85	1867.27	3294.81	1476.42	610.24	1246.98	285.08	617.82	583.33	749.52	469.7	342.29	621.27	453.57	412.05	1128.36	1086.5	910.56	87.95	IPR000454; ATP synthase, F0 complex, subunit C IPR002379; V-ATPase proteolipid subunit C-like domain IPR020537; ATP synthase, F0 complex, subunit C, DCCD-binding site IPR035921; F/V-ATP synthase subunit C superfamily IPR038662; F1F0 ATP synthase subunit C superfamily
TdChr002.501	131.37	194.08	205.3	110.49	76.25	64.83	88.79	94.95	55.69	161.12	52.08	69.57	86.49	85.32	71.88	67.66	67.56	97.2	35.78	142.52	52.72	38.94	35.53	IPR004217; Tim10-like IPR035427; Tim10-like domain superfamily
TdChr002.492	552.87	279.86	98.84	79.7	100.46	52.6	99.9	103.15	78.83	101.19	47.42	105.46	87.23	88.44	67.85	79.26	99.52	100.98	75.67	159.95	128.01	33.67	57.55	IPR009851; Modifier of rudimentary, Modr IPR029012; Helix hairpin bin domain superfamily IPR037202; ESCRT assembly domain
TdChr002.394	157.83	170.9	155.04	79.8	85.67	67.35	151.99	181.19	154.39	227.63	85.38	117.17	122.01	122.21	172.19	160.75	136.14	131.07	93.1	231.02	210.86	38.05	24.39	IPR001433; Oxidoreductase FAD/NAD(P)-binding IPR001709; Flavoprotein pyridine nucleotide cytochrome reductase IPR001834; NADH:cytochrome b5 reductase-like IPR008333; Flavoprotein pyridine nucleotide cytochrome reductase-like, FAD-binding domain IPR017927; FAD-binding domain, ferredoxin reductase-type IPR017938; Riboflavin synthase-like beta-barrel IPR039261; Ferredoxin-NADP reductase (FNR), nucle…
TdChr002.3678	8.44	108.64	19.98	36.17	3.13	3.12	16.22	19.64	1.38	22.75	2.09	6.49	3.96	7.56	1.35	1.98	3.59	5.23	2.22	23.96	5.76	569.85	62.92	IPR002557; Chitin binding domain
TdChr002.3658	380.87	572.07	191.46	139.41	171.33	269.61	331.28	248.45	673.03	235.68	813.41	2468.07	2166.47	3610.82	713.33	1257.19	2311.29	2566.15	4953.28	145.25	3026.49	98.64	192.08	IPR002871; NIF system FeS cluster assembly, NifU, N-terminal IPR011339; ISC system FeS cluster assembly, IscU scaffold
TdChr002.3655	632.97	768.36	921.24	474.79	192.47	166.57	357.61	350.58	60.1	340.96	73.93	87.87	102.85	127.64	149.86	103.72	101.52	84.21	54.26	422.35	156.43	296.79	33.35	IPR001865; Ribosomal protein S2 IPR005707; Ribosomal protein S2, eukaryotic/archaeal IPR018130; Ribosomal protein S2, conserved site IPR023591; Ribosomal protein S2, flavodoxin-like domain superfamily IPR027498; Ribosomal protein S2, eukaryotic IPR032281; 40S ribosomal protein SA, C-terminal domain
TdChr002.3636	2.1	68.68	61.63	97.23	61.31	28.56	122.24	56.43	407.28	20.41	109.44	344.34	388.28	242.49	507.15	146.23	361.15	354.84	345.81	5.14	551.85	137.83	23.8	IPR001753; Enoyl-CoA hydratase/isomerase IPR014748; Enoyl-CoA hydratase, C-terminal IPR018376; Enoyl-CoA hydratase/isomerase, conserved site IPR029045; ClpP/crotonase-like domain superfamily
TdChr002.3626	105.35	173.62	49.96	47.18	77.35	117.75	65.54	46.11	68.57	57.68	51.04	138.21	71.11	81.51	89.87	82.54	149.56	96.51	80.44	80.27	113.22	12.94	135.06	IPR007242; Ubiquitin-like protein Atg12 IPR029071; Ubiquitin-like domain superfamily
TdChr002.3605	405.2	738.34	2808.9	1612.4	953.68	668.9	839.72	867.83	181.23	971.25	201.4	308.4	365.6	466.96	454.36	232.05	278.7	269.27	217.98	1188.69	733.33	1004.9	65.66	IPR001912; Ribosomal protein S4/S9, N-terminal IPR002942; RNA-binding S4 domain IPR005710; Ribosomal protein S4/S9, eukaryotic/archaeal IPR018079; Ribosomal protein S4, conserved site IPR036986; RNA-binding S4 domain superfamily
TdChr002.3595	0	0.68	1.43	58.49	20.22	57.52	19.36	8.02	5.59	1.5	0	5.5	0.94	0	6.95	0.16	0.49	0	0	0	7.82	0	123.98	IPR000618; Insect cuticle protein IPR031311; Chitin-binding type R&R consensus
TdChr002.3586	14.47	255.4	29.92	42.69	41.59	18.9	28.84	22.43	136.83	5.02	34.64	77.88	125.05	110.81	76.18	40.88	82.01	112.59	123.48	7.31	192.98	10.35	18.25	IPR023795; Serpin, conserved site IPR023796; Serpin domain IPR036186; Serpin superfamily IPR042178; Serpin superfamily, domain 1 IPR042185; Serpin superfamily, domain 2
TdChr002.3581	33.48	69.84	36.46	20.5	14.32	10.5	20.27	27.79	9.82	36.44	13.46	13.51	16.19	17.53	10.63	10.77	10.71	10.89	11.73	64.92	22.38	19.32	43.87	IPR013926; CGI121/TPRKB IPR036504; CGI121/TPRKB superfamily
TdChr002.3578	209.44	1822.72	553.48	919.82	1228.29	86.02	914.98	551.9	1888.22	262.91	4545.52	1249.85	1410.27	903.29	1214.27	657.35	865.22	1241.8	1000.14	197.06	1540.48	12174.7	181.26	IPR023795; Serpin, conserved site IPR023796; Serpin domain IPR036186; Serpin superfamily IPR042178; Serpin superfamily, domain 1 IPR042185; Serpin superfamily, domain 2
TdChr002.3566	967.93	1015.25	1195.34	1077.97	956.99	686.14	1752.52	2169.05	1465.42	1676.01	377.34	1469.45	538.9	852.87	344.98	337.1	664.7	246.02	422.91	1450.73	124.09	289.31	53.74	IPR002048; EF-hand domain IPR011992; EF-hand domain pair IPR018247; EF-Hand 1, calcium-binding site
TdChr002.355	586.93	821.59	421.25	260.5	212.99	109.98	221.48	259.48	149.85	257.47	79.74	106.55	101.54	123.65	225.69	124.79	113.19	74.6	70.41	261.88	138.52	108.63	42.35	IPR000426; Proteasome alpha-subunit, N-terminal domain IPR001353; Proteasome, subunit alpha/beta IPR023332; Proteasome alpha-type subunit IPR029055; Nucleophile aminohydrolases, N-terminal IPR035144; Proteasome subunit alpha 1
TdChr002.3481	236.81	184.99	64.92	30.9	18.98	24.85	57.87	74.33	6.69	105.49	11.87	16.98	21.23	43.22	19.31	19.57	16.53	19.62	12	107.48	22.06	18.57	16.67	IPR029063; S-adenosyl-L-methionine-dependent methyltransferase
TdChr002.3411	87.09	234.69	333.09	335.68	173.19	237.38	81.9	98.2	37.87	93.83	49.94	74.22	55.69	70.49	79.82	62.9	74.05	59.83	44.43	113.24	82.31	30.44	70.58	IPR001763; Rhodanese-like domain IPR036873; Rhodanese-like domain superfamily
TdChr002.3340	116.44	180.14	118.34	83.29	85.5	71.19	74.81	60.6	57.21	65.25	43.74	62.08	67.21	70.41	65.68	75.77	69.59	88.2	56.48	94.45	116.24	47.34	27.81	IPR007204; Actin-related protein 2/3 complex subunit 3 IPR036753; Actin-related protein 2/3 complex subunit 3 superfamily
TdChr002.3331	224.75	176.83	84.61	226.68	236	180.62	172.39	183.6	112.41	182.91	286.15	265.76	105.73	142.52	225.24	131.22	294.8	99.79	139.02	85.74	78.62	145.19	19.57	IPR002048; EF-hand domain IPR011992; EF-hand domain pair IPR018247; EF-Hand 1, calcium-binding site
TdChr002.3320	832.64	973.39	252.74	308.6	667.81	404.55	308.7	172.94	158.77	156.8	104.64	133.57	135.01	103.19	180.6	174.02	163.22	159.62	119.75	208.7	262.95	57.52	127.83	IPR002048; EF-hand domain IPR011992; EF-hand domain pair IPR018247; EF-Hand 1, calcium-binding site
TdChr002.3231	58.5	203.2	107.98	138.7	98.55	84.61	126.05	111.74	114.15	89.91	114.32	95.58	206.05	126.33	88.96	98.85	51.72	163.27	110.2	93.09	483.26	31.49	246.82	IPR003689; Zinc/iron permease
TdChr002.3227	174.04	124.45	309.54	256.67	240.33	111.12	235.18	293.36	146.03	285.23	79.1	163.81	119.5	167.09	190.86	129.35	177.13	130.67	109.56	205.23	139.53	94.54	18.12	IPR002035; von Willebrand factor, type A IPR003903; Ubiquitin interacting motif IPR036465; von Willebrand factor A-like domain superfamily
TdChr002.3223	55.54	73.35	115.78	103.4	116.04	157.46	94.63	89.54	68.4	124.91	62.94	306.88	82.38	102.95	111.82	113.68	455.97	71.75	124.67	109.66	69.24	52.59	37.52	IPR004323; Divalent ion tolerance protein, CutA IPR011322; Nitrogen regulatory PII-like, alpha/beta IPR015867; Nitrogen regulatory protein PII/ATP phosphoribosyltransferase, C-terminal
TdChr002.314	338.66	229.24	226.3	342.25	188.18	143.91	165.24	172.37	173.77	200.24	225.81	221.49	209.57	167.72	268.53	319.14	260.47	240.74	186.43	182.94	258.56	220.32	210.93	IPR021149; Oligosaccharyl transferase complex, subunit OST3/OST6 IPR036249; Thioredoxin-like superfamily
TdChr002.3112	1019.88	369.73	257.24	309.53	184.89	107.25	220.67	271.65	133.92	301.73	98.71	111.32	129.5	137.78	145.97	131.77	99.94	138.2	81.8	232.34	82.81	183.02	41.4	IPR000133; ER lumen protein retaining receptor
TdChr002.3111	1585.27	2518.08	2414.97	1419.37	1121.52	1086.14	1135.97	1390.53	227.83	2722.01	408.42	631.87	764.52	1300.51	931.27	548.71	494.12	499.01	355.89	1889.05	1245.74	1484.2	172.03	IPR021131; Ribosomal protein L18e/L15P IPR021132; Ribosomal protein L18e, conserved site IPR036227; Ribosomal L18e/L15P superfamily
TdChr002.3102	0	0	0	0	0.06	1.45	20.55	27.14	0.19	5.85	1.78	0	2.09	1.5	0.14	1.11	0.19	0.59	0	0.96	16.79	0	8203.62	IPR024079; Metallopeptidase, catalytic domain superfamily
TdChr002.3101	1.06	0.26	0.04	0.47	0.06	0.1	6.53	7.5	0	1.69	0.11	0	0.32	0.47	0	0.11	0.17	0.3	0	1.01	4.61	0	6451.65	IPR041645; ADAM cysteine-rich domain 2
TdChr002.3081	0	0	0	0	0.42	1.16	17.16	25.28	0	7.77	0.39	0	1.97	1.34	0	0	0	0.56	0	0.75	17.26	0	9837.92	IPR024079; Metallopeptidase, catalytic domain superfamily IPR041645; ADAM cysteine-rich domain 2
TdChr002.3032	370.91	270.54	344.42	281.33	232.5	80.36	202.27	255.49	22.8	252.49	23.84	53.54	46.16	95.88	24.07	28.51	21.02	25.1	21.37	332.33	23.99	63.29	26.09	IPR000504; RNA recognition motif domain IPR012677; Nucleotide-binding alpha-beta plait domain superfamily IPR035979; RNA-binding domain superfamily
TdChr002.2987	605.69	651.88	217.76	253.08	172.05	251.99	334.74	234.47	450.36	195.01	263.57	467.69	406.88	337.75	300.13	369.14	538.29	448.44	469.88	174.9	410.15	60.84	149.02	IPR002842; V-type ATPase subunit E IPR038495; V-type ATPase subunit E, C-terminal domain superfamily
TdChr002.2917	31.8	59.91	47.58	34.19	30.04	22.6	27.06	37.65	21.11	49.69	26.34	32.59	32.36	28.44	29.5	38.84	32.59	32.81	19.02	72.65	49	8.46	27.55	IPR004853; Sugar phosphate transporter domain
TdChr002.2911	290.77	409.34	143.15	93.84	76.46	98.91	98.32	98.37	32.94	102.59	29.41	44.36	44.04	61.71	49.37	38.47	47.73	38.68	38.5	141.58	92.23	52.13	94.2	IPR023798; Ribosomal protein S7 domain IPR036823; Ribosomal protein S7 domain superfamily
TdChr002.2871	6.73	18.06	25.88	30.17	38.68	33.23	84.48	99.39	42.99	146.13	47.34	51.01	47.43	81.97	42.53	91.46	49.18	77.82	59.4	246.46	156.26	43.77	26.29	IPR007115; 6-pyruvoyl tetrahydropterin synthase/QueD family IPR022469; 6-pyruvoyl tetrahydropterin synthase, histidine active site IPR022470; 6-pyruvoyl tetrahydropterin synthase, cysteine active site IPR038418; 6-pyruvoyl tetrahydropterin synthase/QueD superfamily
TdChr002.283	610.7	966.22	577.65	448.65	319.29	660.72	778.42	271.67	293.36	293.75	166.22	302.78	277.51	431.4	246.35	193.1	318.41	315.33	503.64	351.65	365.03	211.81	144.78	IPR000711; ATPase, OSCP/delta subunit IPR026015; F1F0 ATP synthase OSCP/delta subunit, N-terminal domain superfamily
TdChr002.2776	501.67	334.69	242.18	563.82	115.87	91.78	150.51	207.82	53.54	246.61	67.86	84.2	101.23	125.45	115.06	107.89	107.85	106.59	79.38	290.94	110.84	195	67.98	IPR013766; Thioredoxin domain IPR036249; Thioredoxin-like superfamily
TdChr002.2754	0.28	0.33	0.2	1.19	0.96	2.87	6.14	1.61	12.75	0.21	14.36	5.67	12.31	4.71	14.79	26.7	4.5	13.02	15.59	0.3	10.67	0	25.69	IPR001806; Small GTPase IPR005225; Small GTP-binding protein domain IPR027417; P-loop containing nucleoside triphosphate hydrolase
TdChr002.2739	0	331.78	409.7	1098.94	76.61	37.58	145.36	165.79	486.91	27.34	383.12	97.34	1323.46	1052.26	363.67	106.23	79.75	922.8	1042.01	34.36	7650.43	0	32.29	IPR002350; Kazal domain IPR036058; Kazal domain superfamily
TdChr002.2738	157.23	213	103.8	102.66	100.18	81.73	121.32	145.25	80.66	176.11	52.25	114.63	93.8	125.77	101.17	92.88	127.84	109.13	97.37	251.07	168.93	27.16	28.84	IPR000804; Clathrin adaptor complex, small chain IPR011012; Longin-like domain superfamily IPR016635; Adaptor protein complex, sigma subunit IPR022775; AP complex, mu/sigma subunit
TdChr002.2728	50.32	55.74	27.67	30.23	42.09	23.74	32.47	36.94	22.46	47.96	20.43	39.93	29.47	28.26	26.23	33.8	33.73	26.43	20.62	70.18	46.42	6.11	17.64	IPR008496; TMEM222/RTE1
TdChr002.2707	293.79	683.51	914.74	578.54	363.18	342.76	437.84	543.67	109.36	607.68	109.43	154.35	182.69	295.2	230.82	135.08	152.91	146.73	115.03	667.89	379.63	432.19	122.84	IPR001892; Ribosomal protein S13 IPR010979; Ribosomal protein S13-like, H2TH IPR018269; Ribosomal protein S13, conserved site IPR027437; 30s ribosomal protein S13, C-terminal
TdChr002.2649	190.06	554.94	226.1	167.99	165.75	80.89	64.05	23.72	134.55	8.43	86.6	146.12	114.02	66.29	184.56	144.98	183.77	148.99	105.65	9.02	150.24	67.07	35.66	IPR003593; AAA+ ATPase domain IPR003959; ATPase, AAA-type, core IPR003960; ATPase, AAA-type, conserved site IPR005937; 26S proteasome regulatory subunit P45-like IPR027417; P-loop containing nucleoside triphosphate hydrolase IPR032501; Proteasomal ATPase OB C-terminal domain IPR041569; AAA ATPase, AAA+ lid domain
TdChr002.2642	1660.33	2728.2	4128.55	2426.37	1460.37	1428.33	1572.03	1514.03	222.99	2244.1	305.54	428.45	576.48	897.91	587.48	363.36	350.26	403.14	285.78	3156.3	725.39	2248.21	1414.6	IPR027534; Ribosomal protein L12 family IPR038716; Ribosomal protein P1/P2, N-terminal domain
TdChr002.264	201.8	204.06	89.75	61.41	62.31	57.27	76.53	83.95	53.34	93.1	46.46	84.94	108.25	161.9	63.6	66.31	96.61	119.32	193.71	115.18	151.3	31.82	27.46	IPR001680; WD40 repeat IPR015943; WD40/YVTN repeat-like-containing domain superfamily IPR017986; WD40-repeat-containing domain IPR024977; Anaphase-promoting complex subunit 4, WD40 domain IPR036322; WD40-repeat-containing domain superfamily
TdChr002.2612	542.55	298.12	33.11	45.11	44.69	25.06	45.42	105.5	11.88	182.26	16.42	36.5	8.22	73.84	29.33	31.87	31.9	0	0	194.73	20.57	15.56	32.29	IPR000789; Cyclin-dependent kinase, regulatory subunit IPR036858; Cyclin-dependent kinase, regulatory subunit superfamily
TdChr002.2599	148.71	191.28	62.98	32.26	25.43	43.3	39.83	46.51	10.71	58.66	11.08	25.54	16.01	37.97	16.79	15.19	24.66	12.48	9.94	74.22	28.42	17.42	20.64	IPR026140; 28S ribosomal protein S26
TdChr002.2519	0.62	0.28	8.73	77.67	1567.67	103.88	824.91	594.41	3001.86	126.51	33.13	4890.01	574.31	1624.24	2802.78	17.37	3446.55	302.49	2737.57	23.24	4634.48	0	44.65	IPR001156; Transferrin-like domain IPR016357; Transferrin IPR018195; Transferrin family, iron binding site
TdChr002.2515	765.66	326.73	416.55	450.97	534.1	275.86	701.25	1109.54	85.73	1199.36	41.45	102.33	91.75	389.35	67.27	33.36	94.68	31.25	24.16	1331.57	64.51	21.83	17.12	IPR000169; Cysteine peptidase, cysteine active site IPR004134; Peptidase C1B, bleomycin hydrolase IPR038765; Papain-like cysteine peptidase superfamily
TdChr002.2489	65.1	113.64	53.39	79.59	94.84	92.75	109.14	40.7	151.55	17.17	138.53	247.21	157.03	121.22	104.27	183.48	218.36	194.72	193	24.41	191.84	6.94	28.17	IPR000245; V-ATPase proteolipid subunit IPR002379; V-ATPase proteolipid subunit C-like domain IPR035921; F/V-ATP synthase subunit C superfamily
TdChr002.2442	811.37	490.84	304.54	318.36	241.58	98.67	231.89	283.17	276.47	235.36	94.94	153.47	163.58	222.24	223.68	135.66	149.77	153.49	263.62	236.45	175.65	171.37	28.14	IPR005225; Small GTP-binding protein domain IPR006687; Small GTPase superfamily, SAR1-type IPR006689; Small GTPase superfamily, ARF/SAR type IPR027417; P-loop containing nucleoside triphosphate hydrolase
TdChr002.2366	382.02	430.75	487.74	282.09	137.12	286.65	295.63	313.04	95.98	621.36	112.12	238.05	208.94	383.13	235.29	169.32	296.99	193.65	122.19	552.44	201.39	148.84	22.57	IPR038922; Huntingtin-interacting protein K, UBA-like domain
TdChr002.2351	428.3	247.42	231.33	260.55	185.53	94.14	244.24	226.15	298.61	279.91	184.65	179.07	202.23	191.29	235.3	245.19	204.36	196.5	129.88	200.41	154.66	73.63	51.52	IPR004345; TB2/DP1/HVA22-related protein
TdChr002.2314	476.87	623.5	285.58	236.82	180.14	573.43	465.63	177.27	220.23	319.75	262.61	377.75	329.65	370.48	329.57	373.57	490.85	389.52	368.6	251.31	241.98	170.22	74.09	IPR019173; NADH:ubiquinone oxidoreductase, NDUFB5/SGDH subunit
TdChr002.2252	701.95	1175.38	685.62	633.58	447.74	655.94	1237.61	430.69	557.33	347.11	129.99	242.35	224.28	257.63	192.52	152.01	284.66	239.19	214.64	396.51	518.74	282.56	63.88	IPR008688; ATP synthase, F0 complex, subunit B/MI25
TdChr002.2223	85.72	70.98	83.52	97.53	177.3	194.63	185.43	100.65	174.63	103.3	73.36	284.83	130.18	270.53	252.08	96.59	358.63	153.1	316.34	132.94	243.81	0	31.76	IPR005336; Mitochondrial pyruvate carrier
TdChr002.2216	183.91	302	137.34	71.58	93.38	111.71	88.27	111.02	34.61	129.16	25.49	41.38	55.51	65.91	49.2	43.65	52.71	50.5	35.67	230.67	65.67	33.21	27.08	IPR034596; 39S ribosomal protein L52, mitochondrial
TdChr002.221	463.54	501.5	209.67	218.72	188.41	161.1	212.64	200.11	133.56	171.04	82.67	147.5	127.07	187.71	123.75	118.28	173.12	129.2	171.67	248.01	183.65	90.74	192.53	IPR000996; Clathrin light chain
TdChr002.2161	493.04	356.47	249.45	175.27	203.01	196.94	281.9	302.07	96.68	425.56	84.58	176.22	195.32	277.01	195.25	133.85	223.97	213.53	173.3	567.13	152.59	63.16	45.47	IPR000608; Ubiquitin-conjugating enzyme E2 IPR016135; Ubiquitin-conjugating enzyme/RWD-like IPR023313; Ubiquitin-conjugating enzyme, active site
TdChr002.2123	48.64	55.07	24.86	24.01	28.89	32.21	46.17	55.88	17.91	102.69	17.54	44.96	38.06	50.2	33.28	38.35	48.35	39.02	36.48	123.51	35.96	4.69	23.05	IPR001849; Pleckstrin homology domain IPR011993; PH-like domain superfamily
TdChr002.2113	625.16	378.91	249.68	169.12	108.69	75.55	218.14	319.42	77.46	338.23	50.32	108.04	90.21	173.76	79.95	65.68	91.23	74.29	76.44	511.44	111.79	53.87	34.44	IPR001440; Tetratricopeptide repeat 1 IPR011990; Tetratricopeptide-like helical domain superfamily IPR013026; Tetratricopeptide repeat-containing domain IPR019734; Tetratricopeptide repeat IPR032374; SGTA, homodimerisation domain
TdChr002.2074	196.17	338.63	150.33	312.28	77.09	48.26	97.29	104.22	76.52	139.88	55.18	57.78	50.81	64.16	62.03	48.91	61.24	44.52	25.49	168.71	56.81	223.01	238.8	IPR000866; Alkyl hydroperoxide reductase subunit C/ Thiol specific antioxidant IPR013766; Thioredoxin domain IPR019479; Peroxiredoxin, C-terminal IPR024706; Peroxiredoxin, AhpC-type IPR036249; Thioredoxin-like superfamily
TdChr002.2031	97.08	151.11	71.57	48.94	43.86	32.8	50.25	64.59	27.07	70.77	22.05	42.41	25.69	44.48	31.27	33.68	43.26	32.45	22.34	99.7	46.66	23.64	17.99	IPR010358; BRCA1-A complex subunit BRE
TdChr002.2005	103.55	75.94	0.72	0	0	1.05	43.46	59.52	0	14.52	0.9	0	5.25	1.91	0	0	0	1.01	0	1.31	45.04	1.23	45826	IPR001881; EGF-like calcium-binding domain IPR009030; Growth factor receptor cysteine-rich domain superfamily IPR018097; EGF-like calcium-binding, conserved site
TdChr002.2004	0	0	0	0	0	72.33	452.23	458.55	0	58.74	1.32	0	21.01	14.13	0	0	0	2.67	0	8.55	97.32	0	25214.4	IPR001881; EGF-like calcium-binding domain IPR009030; Growth factor receptor cysteine-rich domain superfamily IPR018097; EGF-like calcium-binding, conserved site
TdChr002.1986	161.05	237.3	120.03	70.48	64.11	71.49	68.4	58.28	24.11	63.24	22.01	31.5	31.02	43.66	37.52	27.94	34.01	29.68	27.81	94.58	53.28	31.77	17.47	IPR007741; Ribosomal protein/NADH dehydrogenase domain IPR036249; Thioredoxin-like superfamily
TdChr002.1985	47.9	141.32	87.72	113.88	23.48	27.8	44.78	36.28	62.69	43.37	37.57	59.05	50.38	52.19	86.3	55.26	75.16	59.66	47.09	34.51	99.64	25.81	22.03	IPR000056; Ribulose-phosphate 3-epimerase-like IPR011060; Ribulose-phosphate binding barrel IPR013785; Aldolase-type TIM barrel IPR026019; Ribulose-phosphate 3-epimerase
TdChr002.1818	1680.66	1754.4	2226.62	1651.12	1564.86	372.36	1306.4	1494.74	357.38	1061.75	163.83	297.83	293.6	427.97	137.06	255.01	247.22	194.44	157.96	1948.36	443.22	439.37	326.76	IPR000626; Ubiquitin-like domain IPR022617; Rad60/SUMO-like domain IPR029071; Ubiquitin-like domain superfamily
TdChr002.171	76.2	49.18	29	34.73	30.96	24.41	51.84	71.55	34.98	71.41	25.89	58.2	38.1	56.87	34.12	31.81	55.24	38.83	53.32	64.71	37.6	24.18	18.17	IPR000306; FYVE zinc finger IPR001841; Zinc finger, RING-type IPR011011; Zinc finger, FYVE/PHD-type IPR013083; Zinc finger, RING/FYVE/PHD-type IPR015390; Rabaptin, GTPase-Rab5 binding domain IPR017455; Zinc finger, FYVE-related IPR017907; Zinc finger, RING-type, conserved site
TdChr002.1670	639.88	673.47	184.79	124.09	75.61	84.33	176.15	203.1	31.89	232.42	41.87	58.97	61.82	102.77	60.76	48.76	62.56	58.6	35.9	344.22	101.08	77.69	103.91	IPR000740; GrpE nucleotide exchange factor IPR009012; GrpE nucleotide exchange factor, head IPR013805; GrpE nucleotide exchange factor, coiled-coil
TdChr002.1668	1506.97	2002.59	1046.68	1029.83	888.16	1095.66	2389.49	1034.32	2059.49	545.27	412.61	668.94	929.48	3313.77	402.49	552.1	822.01	808.04	2726.34	729.89	2929.36	386.46	78.49	IPR008386; ATP synthase, F0 complex, subunit E, mitochondrial
TdChr002.144	250.76	437.46	597.88	383.02	284.64	199.57	358.61	326.39	64.91	269.42	56.96	65.68	83.95	108.68	100.6	66.41	77.21	65.32	47.69	399.67	112.05	123.3	18.63	IPR001921; Ribosomal protein L7A/L8 IPR004037; Ribosomal protein L7Ae conserved site IPR004038; Ribosomal protein L7Ae/L30e/S12e/Gadd45 IPR018492; Ribosomal protein L7Ae/L8/Nhp2 family IPR029064; 50S ribosomal protein L30e-like IPR038524; Ribosomal protein L7A/L8 superfamily
TdChr002.1438	327.74	387.89	97.39	100.61	121.51	80.08	151.58	179.68	47.59	169.82	46.58	98.2	78.04	113.63	35.86	52.22	73.34	76.32	63.37	250.38	120.42	24.17	48.82	IPR007307; Low temperature viability protein Ltv1
TdChr002.1377	388.51	469.09	804.8	789.6	564.41	1486.95	1867.24	803.21	1558.82	559.97	587.15	1259.18	2452.48	10158.2	769.9	717.34	1838.22	2128.88	14284.1	743.05	5309.41	578.63	191.35	IPR010530; NADH-ubiquinone reductase complex 1 MLRQ subunit
TdChr002.1358	33.1	219.83	134.29	31.29	144.83	89.22	86.8	52.22	85.21	61.07	186.34	72.52	102.43	62.13	52.79	113.88	80.49	101.25	48.5	79.04	225.25	4.66	547.46	IPR001568; Ribonuclease T2-like IPR033130; Ribonuclease T2, His active site 2 IPR033697; Ribonuclease T2, eukaryotic IPR036430; Ribonuclease T2-like superfamily
TdChr002.1349	1214.78	534.25	273.55	137.99	211.8	458.39	613.18	840.9	294.64	1710.28	431.06	486.91	691.2	877.73	867.98	832.64	656.68	765.74	499.46	1302.39	926.93	102.88	263.77	IPR006110; RNA polymerase, subunit omega/K/RPB6 IPR006111; Archaeal RpoK/eukaryotic RPB6 RNA polymerase subunit IPR012293; RNA polymerase subunit, RPB6/omega IPR020708; DNA-directed RNA polymerase, 14-18kDa subunit, conserved site IPR028363; DNA-directed RNA polymerase, subunit RPB6 IPR036161; RPB6/omega subunit-like superfamily
TdChr002.1346	5.11	9.55	16.03	9.96	25.73	6.83	3.37	2.45	7.65	0.78	1.17	2.19	4.44	2.83	20.01	0.59	0.91	3.17	1.27	0.49	15.72	0	52.59	IPR011701; Major facilitator superfamily IPR036259; MFS transporter superfamily
TdChr002.1310	19.47	96.95	59.88	40.43	23.74	44.01	53.47	50.88	29.68	56.36	15.83	25.09	23.92	29.41	28.4	20.47	38.92	31.13	15.93	106.37	41.76	15.35	19.06	IPR002942; RNA-binding S4 domain IPR036986; RNA-binding S4 domain superfamily
TdChr002.1282	257.32	473.96	809.65	656.14	405.93	1773.61	1780.92	453.99	961.62	499.93	371.51	691.81	1034.84	3046.83	480.6	482.88	820.56	1027.93	3497.24	518.35	1984.26	299.25	618.77	IPR036539; Cytochrome c oxidase, subunit VIIa superfamily
TdChr002.1251	19.82	37.14	13.41	13.72	23.29	25.76	20.88	17.37	29.03	22.83	21.42	39.39	26.79	27.31	30.9	32.4	46.8	34.09	21.08	22.07	63.49	2.71	82.33	IPR019402; Frag1/DRAM/Sfk1
TdChr002.1246	155	464.5	202.71	225.63	160.73	256.43	148.07	64.37	75.76	62.02	35.56	87.95	45.9	62.16	66.53	41.44	87.44	45.07	51.59	95.39	81.2	149.34	22.33	IPR001189; Manganese/iron superoxide dismutase IPR019831; Manganese/iron superoxide dismutase, N-terminal IPR019832; Manganese/iron superoxide dismutase, C-terminal IPR019833; Manganese/iron superoxide dismutase, binding site IPR036314; Manganese/iron superoxide dismutase, C-terminal domain superfamily IPR036324; Manganese/iron superoxide dismutase, N-terminal domain superfamily
TdChr002.1239	343.37	568.03	444.46	342.26	229.67	223.27	357.16	294.22	232.73	418.53	234.64	278.5	174.98	284.75	281.1	510.44	302.43	199.92	206.13	346.12	259.68	112.38	152.84	IPR013740; Redoxin IPR013766; Thioredoxin domain IPR036249; Thioredoxin-like superfamily IPR037944; Peroxiredoxin-5-like
TdChr002.1236	1219.11	1843.27	1422.51	1074.91	794.44	251.93	651.94	980.24	351.5	1049.52	325.14	683.53	402.77	539	387.86	301.52	532.35	265.75	235.98	1374.4	643.22	504.52	605.61	IPR004087; K Homology domain IPR004088; K Homology domain, type 1 IPR036612; K Homology domain, type 1 superfamily
TdChr002.1230	1214.7	1682.13	3656.98	1994.37	1610.37	1830.75	1500.15	1819.35	472.16	3074.65	616.57	933.52	1012.02	1684.22	1272.62	760.08	863.26	748.13	574.01	3125.16	1614.77	1558.17	613.57	IPR001971; Ribosomal protein S11 IPR018102; Ribosomal S11, conserved site IPR036967; Ribosomal protein S11 superfamily
TdChr002.1218	0.17	0.74	0	0.13	0.6	0.24	27.33	19.73	62.67	3.44	45.49	13.56	47.41	8.92	111.03	129.64	19.26	68.68	16.15	0.53	517.36	0	68.93	IPR001360; Glycoside hydrolase family 1 IPR017853; Glycoside hydrolase superfamily IPR018120; Glycoside hydrolase family 1, active site
TdChr002.1206	379.75	216.55	97.11	99.54	120.13	113.97	108.95	101.99	137.55	100.09	131.12	172.24	118.08	102.56	151.66	209.89	176.04	121.1	105.56	96.8	116	94.4	19.73	IPR000608; Ubiquitin-conjugating enzyme E2 IPR016135; Ubiquitin-conjugating enzyme/RWD-like
TdChr002.1203	187.25	174.34	85.31	117.86	80.79	59.18	85.21	100.07	53.03	130.09	49.85	73.93	64.06	76.82	56.76	65.27	80.09	77.09	48.98	171.65	93.68	69.91	78.02	IPR006822; Coatomer, epsilon subunit IPR011990; Tetratricopeptide-like helical domain superfamily
TdChr002.1200	826.44	379.95	442.5	455.22	166.03	137.65	553.35	836.7	150.55	889.32	97.19	112.67	150.45	399.75	164.9	237.47	165.58	178.19	103.65	1346.41	59.67	210.42	262.08	IPR019345; Armet protein IPR036361; SAP domain superfamily
TdChr002.1192	1266.07	1161.21	565.13	399.52	308.43	161.15	383.23	476.92	22.66	404.23	17.84	54.84	52.97	131.92	49.11	33.55	60.13	32.61	26.28	628.59	85.43	114.74	21.95	IPR003173; Transcriptional coactivator p15 (PC4) IPR009044; ssDNA-binding transcriptional regulator
TdChr002.1173	277.16	317.29	135.29	114.75	99.73	233.31	303.73	111.6	145.11	117.78	51.67	123.95	126.44	454.66	84.74	56.64	129.4	146.17	628.68	111.7	191.42	64.02	16.78	IPR001509; NAD-dependent epimerase/dehydratase IPR036291; NAD(P)-binding domain superfamily
TdChr002.114	627.01	290.72	206.94	280.45	101.57	65.97	146.14	136.55	143.63	157.38	204.21	185.34	187.56	186.87	146.66	414	183.08	199.88	148.49	149.04	149.68	180.55	335.24	IPR009038; GOLD domain IPR036598; GOLD domain superfamily
TdChr002.1042	974.07	620.59	210.78	145.52	164.61	142.45	212.48	235.09	97.58	404.75	71.33	139.01	111.52	194.54	96.82	95.72	112.87	90.07	96	217.58	83.59	76.42	69.64	IPR000608; Ubiquitin-conjugating enzyme E2 IPR016135; Ubiquitin-conjugating enzyme/RWD-like IPR023313; Ubiquitin-conjugating enzyme, active site
TdChr002.1022	664.76	909.11	1943.75	1468.11	1159.08	1156.36	966.28	1136.73	337.61	2070.92	594.34	825.66	906.2	1136.5	1155.37	799.59	712.09	682.02	511.19	1832.74	1209.42	1183.51	18.86	IPR001063; Ribosomal protein L22/L17 IPR005721; Ribosomal protein L22/L17, eukaryotic/archaeal IPR018260; Ribosomal protein L22/L17, conserved site IPR036394; Ribosomal protein L22/L17 superfamily
TdChr002.1012	190.24	166.22	84.95	88.51	89.47	106.3	99.38	94.29	85.61	104.72	61.89	120.67	63.62	76.25	75.26	90.39	118.05	68.13	51.69	104.94	91.94	39.25	48.5	IPR011990; Tetratricopeptide-like helical domain superfamily IPR013026; Tetratricopeptide repeat-containing domain
TdChr002.060	870.41	658.54	184.84	239.56	170.31	187.89	132.11	207.88	21.87	359.02	55.54	53.13	51	139.17	63.69	79.08	65.56	29.08	28.93	296.78	51.83	299.41	90.28	IPR009038; GOLD domain IPR036598; GOLD domain superfamily
TdChr002.030	47.36	100.05	36.22	86.86	22.01	29.15	76.8	41.9	207.33	24.99	21.46	461.7	38.34	74.5	32.04	32.55	454.17	41.67	96	22.56	46.71	17.69	20.37	IPR000462; CDP-alcohol phosphatidyltransferase IPR014387; CDP-diacylglycerol-inositol 3-phosphatidyltransferase, eukaryote
TdChr002.020	261.68	295.6	73.91	68.01	62.87	94.8	104.59	115.31	44.28	51.26	21.81	42.41	36.05	54.46	26.47	27.94	46.41	50.34	36.31	209.04	91.8	23.73	27.43	IPR013730; Fyv7/TAP26
TdChr001.958	3810.73	985.1	653.47	504.72	717.72	364.94	1047.13	1394.27	422.76	1320.08	215.08	449.43	360.89	553.84	235.83	224.34	481.1	367.92	343.77	1470.6	480.91	120.89	828.89	IPR001232; S-phase kinase-associated protein 1-like IPR011333; SKP1/BTB/POZ domain superfamily IPR016072; SKP1 component, dimerisation IPR016073; SKP1 component, POZ domain IPR016897; S-phase kinase-associated protein 1 IPR036296; SKP1-like, dimerisation domain superfamily
TdChr001.945	475.04	218.54	231.83	266.21	162.4	74.3	159.48	247.61	50.04	277.26	86.86	78.45	66.27	121.38	60.53	98.53	66.55	55.68	42.01	270.33	77.95	115.32	37.81	IPR007676; Ribophorin I IPR039491; Required for excision 1-B domain-containing protein
TdChr001.804	3092.82	2048.38	1668.34	1056.5	301.97	292.01	777.85	1274.83	63.04	1486.19	76.92	83.82	187.59	555	115.56	88.64	106.24	104.31	64.13	1751.52	148.84	494.15	68.24	IPR001326; Translation elongation factor EF1B, beta/delta chains, conserved site IPR014038; Translation elongation factor EF1B, beta/delta subunit, guanine nucleotide exchange domain IPR014717; Translation elongation factor EF1B/ribosomal protein S6 IPR018940; Elongation factor 1 beta central acidic region, eukaryote IPR036219; Translation elongation factor eEF-1beta-like superfamily IPR036282; G…
TdChr001.789	1464.66	489.95	1533.05	994.36	636.66	379.9	878.41	1209.56	395.6	1795.62	96.71	414.41	243.51	675.85	223.64	80.31	552.44	132.56	153.29	916.31	215.23	431.37	299.36	IPR001564; Nucleoside diphosphate kinase IPR023005; Nucleoside diphosphate kinase, active site IPR034907; Nucleoside diphosphate kinase-like domain IPR036850; Nucleoside diphosphate kinase-like domain superfamily
TdChr001.746	3217.71	3940.82	4000.43	2631.86	1745.76	1191.64	2019.58	2486.97	382.07	2591.73	408.52	533.11	758.34	1175.33	804.82	508.45	485.21	498.95	388.78	3043.26	1085.54	1806.78	190.88	IPR002136; Ribosomal protein L4/L1e IPR013000; Ribosomal protein L4/L1e, eukaryotic/archaeal, conserved site IPR023574; Ribosomal protein L4 domain superfamily IPR025755; 60S ribosomal protein L4, C-terminal domain
TdChr001.744	55.84	74.91	33.22	37.06	128.88	56.87	46.55	57.51	21.76	56.06	37.8	29.06	39.99	42.45	59.6	58.27	42.63	38.57	19.72	88.37	44.21	12.86	29.82	IPR002048; EF-hand domain IPR011992; EF-hand domain pair
TdChr001.737	119.35	230.26	69.51	56.94	44.08	51.11	107.79	86.98	66.2	111.86	27.76	67.57	107.76	334.82	51.04	35.92	84.8	118.85	1063.4	150.16	86.9	52.44	30.81	IPR019362; Methylmalonic aciduria and homocystinuria type D protein
TdChr001.716	230.48	148.11	53.85	25.7	26.34	18.81	44.85	61.36	18.55	78.26	17.34	28.58	21.17	34.34	20.84	23.48	24.21	22.8	16.87	138.73	34.48	14.49	16.87	IPR002716; PIN domain IPR006984; rRNA-processing protein Fcf1/Utp23 IPR029060; PIN-like domain superfamily
TdChr001.693	145.85	47.34	63.12	74.01	40.1	20.7	70.36	90.04	16.71	121.55	14.2	16.03	28.25	45.45	23.47	30.06	20.48	22.11	15.46	140.2	14.92	36.39	35.1	IPR013657; UAA transporter
TdChr001.681	0	0	0.04	0.08	0.18	2.53	10.56	0.63	157.32	0.19	6.41	0.23	0.21	0.2	645.45	0.4	0.4	1.25	0.3	0	5.2	0	16.98	IPR000718; Peptidase M13 IPR008753; Peptidase M13, N-terminal domain IPR018497; Peptidase M13, C-terminal domain IPR024079; Metallopeptidase, catalytic domain superfamily IPR042089; Peptidase M13, domain 2
TdChr001.659	632.35	1251.85	3858.63	2606.18	2234.79	1429.43	1725.82	1935.99	487.44	2220.83	576.51	897.38	964.51	1295.52	1157.34	703.93	718.14	656.03	528.9	3276.27	1686.8	1613.31	808.5	IPR000554; Ribosomal protein S7e
TdChr001.631	0	0	0	0	0	0	5.94	10.51	0	2.28	0.06	0.06	0.43	0.42	0	0	0.05	0.16	0	0.16	4.36	0	265.04	IPR000718; Peptidase M13 IPR008753; Peptidase M13, N-terminal domain IPR018497; Peptidase M13, C-terminal domain IPR024079; Metallopeptidase, catalytic domain superfamily IPR042089; Peptidase M13, domain 2
TdChr001.628	28.6	4.64	0	0.02	0	3.38	24.44	41.02	0	37.44	0.63	0.06	2.93	13.82	0	0.14	0	0.68	0	25.76	16.45	0	1060.4	IPR000718; Peptidase M13 IPR008753; Peptidase M13, N-terminal domain IPR018497; Peptidase M13, C-terminal domain IPR024079; Metallopeptidase, catalytic domain superfamily IPR042089; Peptidase M13, domain 2
TdChr001.618	0	0	0	0	0.03	0.61	14.34	21.48	0	4.75	0.05	0	1.21	1.13	0	0	0	0.2	0	0.64	13.78	0	1983.49	IPR000718; Peptidase M13 IPR008753; Peptidase M13, N-terminal domain IPR018497; Peptidase M13, C-terminal domain IPR024079; Metallopeptidase, catalytic domain superfamily IPR042089; Peptidase M13, domain 2
TdChr001.617	0	0	0	0.04	0	0.45	10.02	13.82	0.02	2.51	0	0	0.55	1.15	0	0	0	0.2	0	0.46	7.26	0	741.81	IPR000718; Peptidase M13 IPR008753; Peptidase M13, N-terminal domain IPR018497; Peptidase M13, C-terminal domain IPR024079; Metallopeptidase, catalytic domain superfamily IPR042089; Peptidase M13, domain 2
TdChr001.615	31.43	381.55	431.28	1004.62	2.02	19.95	8.52	7.62	1.19	1.14	91.07	0.87	1.41	1.22	0.12	3.86	0.51	1.99	0.31	0.2	286.62	3.79	66.78	IPR000718; Peptidase M13 IPR008753; Peptidase M13, N-terminal domain IPR018497; Peptidase M13, C-terminal domain IPR024079; Metallopeptidase, catalytic domain superfamily IPR042089; Peptidase M13, domain 2
TdChr001.599	0	0	0.03	0	0	7.73	46.73	8.71	89.11	0.27	1.38	25.02	0.72	17.52	23.33	0.12	10.87	2.94	143.3	0	0.77	0	17.04	IPR001365; Adenosine/AMP deaminase domain IPR006331; Adenosine deaminase-related growth factor IPR013659; Adenosine/AMP deaminase N-terminal IPR032466; Metal-dependent hydrolase
TdChr001.531	96.26	135.81	66.85	44.88	41.52	42.65	43.08	51.27	14.51	95.53	33.19	50.19	39.04	63.92	49.85	45.43	46.51	36	28.95	100.75	64.81	17.24	124.6	IPR021149; Oligosaccharyl transferase complex, subunit OST3/OST6
TdChr001.523	0	0	0.18	0.08	0.41	0.6	2.38	2.17	0.73	1.19	0.16	0.11	0.57	0.48	1.24	0.39	1.56	0.31	2.77	0.25	1.9	0	1202.77	IPR000734; Triacylglycerol lipase family IPR013818; Lipase/vitellogenin IPR029058; Alpha/Beta hydrolase fold
TdChr001.494	0.56	1.27	0	1.41	22.45	73.91	45	13.86	95.12	5.22	0	548.31	7.04	102.41	17.5	2.97	875.24	11.74	194.11	1.13	1.06	0	51.31	IPR006170; Pheromone/general odorant binding protein IPR036728; Pheromone/general odorant binding protein superfamily
TdChr001.493	214.67	12.04	0	0	0	15.67	215.07	368.01	0	688.85	7.29	5.24	52.76	223.75	0	2.88	0.63	2.8	0	573.76	22.02	0	53.65	IPR008037; Pacifastin domain IPR016307; Protease inhibitor with pacifastin repeats IPR036201; Pacifastin domain superfamily
TdChr001.476	334.6	1032.42	1576.78	702.16	350.97	370.88	898.63	1261.8	57.49	1590.25	92.54	190.76	291.08	651.88	154.43	107.05	172.8	171.67	106.29	1224.9	300.38	286.32	43.91	IPR002715; Nascent polypeptide-associated complex NAC domain IPR038187; NAC A/B domain superfamily
TdChr001.432	18.07	41.84	46.79	32.97	32.43	30.36	23.73	15.71	9.65	33.72	14.77	20.04	20.95	20.84	26.56	24.18	24.97	14.17	13.18	35.42	19.65	10.69	23.15	IPR008584; CXXC motif containing zinc binding protein, eukaryotic
TdChr001.428	61.86	78.63	100.91	68.58	62.11	45.91	67.06	63.22	36.96	65.69	35.98	57.29	53.8	68.6	50.61	36.31	68.65	61.95	76.93	124.82	73.43	29.86	18.89	IPR008532; NFACT, RNA-binding domain
TdChr001.3621	489.43	421.56	198.39	56.88	91.17	76.8	65.81	84.76	35.34	121.17	28.5	44.52	43.69	66.73	78.77	39.03	62.52	37.13	31.62	96.04	44.66	36	133.45	IPR000182; GNAT domain IPR016181; Acyl-CoA N-acyltransferase
TdChr001.3590	407.78	216.26	180	146.55	93.81	69.3	89.88	121.25	28.58	154.77	34.37	35.33	56.38	71.72	50.99	42.57	52.82	50.01	39.45	130.05	31.85	91.07	18.04	IPR001680; WD40 repeat IPR015943; WD40/YVTN repeat-like-containing domain superfamily IPR017986; WD40-repeat-containing domain IPR036322; WD40-repeat-containing domain superfamily
TdChr001.3579	64.87	28.71	40.98	57.49	32.77	15.48	52.41	77.52	15.29	88.96	22.22	15.68	15.25	41.68	15.05	18.48	11	8.65	11.65	83.79	5.23	34.33	24.31	IPR002524; Cation efflux protein IPR027469; Cation efflux transmembrane domain superfamily
TdChr001.3574	152.83	171.19	64.62	52.43	98.29	57.96	76.55	67.58	85.52	79.71	56.57	144.79	121.73	115.01	88.74	91.08	169.97	146.78	146.06	102.33	138.98	18	50.69	IPR001478; PDZ domain IPR036034; PDZ superfamily IPR040815; Nas2, N-terminal IPR041489; PDZ domain 6
TdChr001.3560	12.96	32.07	41.22	21.77	31.88	29.41	23.82	25.17	14.48	43.22	17.25	25.17	17.38	23.26	33.37	23.04	21.93	19.62	11.37	47.93	26.66	8.49	32.66	IPR004443; YjeF N-terminal domain IPR036652; YjeF N-terminal domain superfamily
TdChr001.3546	1373.99	609.14	537.85	355.67	414.15	184.64	404.32	506.72	115.12	474.92	121.96	356.92	155.27	223.39	93.66	105.01	208.16	103.87	134.5	384.74	143.11	99.66	20.97	IPR000504; RNA recognition motif domain IPR001878; Zinc finger, CCHC-type IPR012677; Nucleotide-binding alpha-beta plait domain superfamily IPR035979; RNA-binding domain superfamily IPR036875; Zinc finger, CCHC-type superfamily
TdChr001.3420	455.4	263.05	374.55	449.43	234.46	137.52	218.27	297.07	127.51	292.05	138.42	160.23	174.07	209.24	188.02	182.08	187.13	176.93	141.99	388.98	252.69	285.29	168.14	IPR009038; GOLD domain
TdChr001.3416	101.72	198.39	141.94	91.2	89.46	36.49	66.23	67.97	10.16	74.18	16.47	27.55	24.95	35.06	34.32	22.57	30.74	22.33	14.18	120.21	31.14	23.9	17.8	IPR019265; RNA transcription, translation and transport factor protein
TdChr001.3415	83.31	113.9	64.21	41.62	37.15	61.58	58.33	53.61	21.55	57.36	14.82	40.25	28.17	35.39	32.96	23.05	47.09	37.75	34.26	86.59	45.84	20.99	25.91	IPR019192; Ribosomal protein L28/L40, mitochondrial
TdChr001.3400	529.27	526.19	404.58	269.06	259.39	157.82	233.1	262.78	145.66	294.76	95.75	196.34	155.66	178.22	224.64	150.15	227.81	152.41	127.24	279.19	162.12	127.68	20.29	IPR003593; AAA+ ATPase domain IPR003959; ATPase, AAA-type, core IPR003960; ATPase, AAA-type, conserved site IPR005937; 26S proteasome regulatory subunit P45-like IPR027417; P-loop containing nucleoside triphosphate hydrolase IPR032501; Proteasomal ATPase OB C-terminal domain IPR041569; AAA ATPase, AAA+ lid domain
TdChr001.3395	2.15	119.36	101.75	789.5	90.03	798.06	2063.42	1656.46	8821.11	250.25	7219.16	6307.51	13233.4	3024.54	4377.32	8194.31	6630.81	17285.8	4016.2	319.9	41908.2	18541.2	1207.56	IPR005055; Insect odorant-binding protein A10/Ejaculatory bulb-specific protein 3 IPR036682; Insect odorant-binding protein A10/Ejaculatory bulb-specific protein 3 superfamily
TdChr001.3330	433.49	1042.36	320.37	372.63	255.21	167.81	217.92	117.26	299.73	93.05	108.92	231.23	209.68	165.5	280.46	136.17	241.9	207.04	225.27	97.77	325.72	144.27	40.21	IPR000049; Electron transfer flavoprotein, beta-subunit, conserved site IPR012255; Electron transfer flavoprotein, beta subunit IPR014729; Rossmann-like alpha/beta/alpha sandwich fold IPR014730; Electron transfer flavoprotein, alpha/beta-subunit, N-terminal IPR033948; Electron transfer flavoprotein, beta subunit, N-terminal
TdChr001.329	1.62	5.72	18.9	157.97	17.85	89.7	47.43	23.82	153.94	9.44	110.43	287.58	223.94	189.21	215.66	119.81	193.16	149.83	151.88	2.71	106.61	271.35	79.94	IPR002347; Short-chain dehydrogenase/reductase SDR IPR036291; NAD(P)-binding domain superfamily
TdChr001.328	0	0.69	18.44	130.79	19.3	10.76	45.84	29.7	65.58	2.01	21.27	43.86	50.21	30.07	46.84	18.27	30.2	20.28	26.43	0	19.55	140.52	60.33	IPR002347; Short-chain dehydrogenase/reductase SDR IPR036291; NAD(P)-binding domain superfamily
TdChr001.327	1.34	8.69	48.16	436.98	58.72	97.32	159.74	66.12	324.31	14.3	125.62	306.74	185.97	195.56	218.32	113.69	222.23	145.04	177.36	3.28	168.56	629.92	44.99	IPR002347; Short-chain dehydrogenase/reductase SDR IPR036291; NAD(P)-binding domain superfamily
TdChr001.3259	847.91	1437.78	5630.59	3707.94	2936.25	1950.09	2592.1	2828.82	603.18	3793.26	641.12	1059.59	1007.6	1595.31	1293.01	872.64	977.09	807	607.45	5053	1659.99	2130.75	84.13	IPR000266; Ribosomal protein S17/S11 IPR012340; Nucleic acid-binding, OB-fold IPR019979; Ribosomal protein S17, conserved site IPR028333; Ribosomal protein S17, archaeal/eukaryotic IPR032440; 40S ribosomal protein S11, N-terminal
TdChr001.3253	109.65	101.86	58.8	42.78	80.24	29.67	47.73	59.95	19.94	56.32	12.64	37.36	31.62	33.58	37.36	19.85	34.59	28.66	21.11	58.9	52.87	4.04	24.07	IPR001440; Tetratricopeptide repeat 1 IPR011990; Tetratricopeptide-like helical domain superfamily IPR013026; Tetratricopeptide repeat-containing domain IPR019734; Tetratricopeptide repeat IPR040478; BDBT FKBP like, N-terminal
TdChr001.3205	167.73	90.1	51.98	80.51	83.42	81.37	110.79	87.48	200.93	117.17	68.11	74.49	81.63	94.87	369.13	111.72	111.06	82.72	54.4	171.4	103.92	25.26	275.12	IPR016040; NAD(P)-binding domain IPR036291; NAD(P)-binding domain superfamily
TdChr001.3177	486.59	928.26	4710.14	2990.49	2330.69	1271.07	2080.12	2610.39	501.63	2972.11	439.18	618.09	695.51	1238.35	787.9	489.04	539.01	494.57	383.42	3012.23	1364.39	1797.44	116.41	IPR001780; Ribosomal protein L35A IPR009000; Translation protein, beta-barrel domain superfamily IPR018266; Ribosomal protein L35Ae, conserved site IPR038661; Ribosomal protein L35A superfamily
TdChr001.3095	7.93	1005.04	130.11	441.1	166.49	129.28	1228.77	175.3	1238.27	11.88	62.37	157.07	1617.61	199.47	98.88	37.33	124.69	927.21	236.18	6.8	6348.39	0.42	18.15	IPR002048; EF-hand domain IPR011992; EF-hand domain pair IPR018247; EF-Hand 1, calcium-binding site
TdChr001.3044	506.11	315.75	246.59	188.1	121.58	59.82	180.07	197.62	35.5	230.91	23.19	34.96	35.81	69.15	36.12	26.83	47.78	39.51	23.58	319.25	53.87	156.77	47.72	IPR003210; Signal recognition particle, SRP14 subunit IPR009018; Signal recognition particle, SRP9/SRP14 subunit
TdChr001.3031	100.97	97.29	49.58	38.31	21.64	35.33	25.94	36.63	16.17	25.12	24.63	51.91	34.54	39.61	23.53	34.04	43.8	41.58	23.52	44.1	34.06	39.77	53.19	IPR000727; Target SNARE coiled-coil homology domain IPR039899; BET1, SNARE domain
TdChr001.3024	0	0	0	0	0	0.07	18.76	32.42	0.03	6.43	0.04	0	1.68	1.79	0	0.07	0	0.26	0	1.1	18.13	0	11572.2	IPR036716; Pesticidal crystal protein, N-terminal domain superfamily
TdChr001.3022	0	0	0	0	0	0	1.07	1.17	0	0.21	0.07	0	0.11	0	0	0	0	0	0	0	1.18	0	394.22	IPR041645; ADAM cysteine-rich domain 2
TdChr001.3007	515.42	875.64	2041.61	937.92	1377.25	484.01	1265.43	1013.48	1099.98	1010.73	263.16	547.51	434.95	536.11	733.95	309.17	575.51	360.08	307.92	786.48	560.33	228.95	24.19	IPR000866; Alkyl hydroperoxide reductase subunit C/ Thiol specific antioxidant IPR013766; Thioredoxin domain IPR019479; Peroxiredoxin, C-terminal IPR024706; Peroxiredoxin, AhpC-type IPR036249; Thioredoxin-like superfamily
TdChr001.2955	254.63	265.41	68.89	80.6	72.38	67.28	59.45	38.16	50.64	53.03	28.34	113.04	48.82	55.69	39.7	45.57	108.89	60.28	54.28	92.25	88.9	14.83	46.91	IPR000804; Clathrin adaptor complex, small chain IPR011012; Longin-like domain superfamily IPR016635; Adaptor protein complex, sigma subunit IPR022775; AP complex, mu/sigma subunit
TdChr001.2942	277.15	238.54	223.71	384.26	184.42	193.59	167.82	123.89	295.71	67.82	94.32	205.39	257.86	196.91	96.2	52.04	72.38	116.23	242.03	42.2	74.73	190.86	24.43	IPR003388; Reticulon
TdChr001.2925	3286.11	2101.53	2247.39	1316.16	1392.89	745.5	1222.36	1734.2	436.78	1953.84	354.4	668.36	578.85	1067.16	1071.87	559.96	767.19	565.66	516.77	1360.41	1145.54	702.21	370.02	IPR011057; Mss4-like superfamily IPR011323; Mss4/translationally controlled tumour-associated TCTP IPR018103; Translationally controlled tumour protein, conserved site IPR018105; Translationally controlled tumour protein IPR034737; Translationally controlled tumour protein (TCTP) domain
TdChr001.2910	1632.19	1829.93	2089.65	1220.23	700.84	573.33	1051.12	1430.68	178.36	1559.67	189.85	269.57	294.13	638.42	367.42	233.56	198.3	214.55	180.25	1075.91	264.78	684.5	373.74	IPR001884; Translation elongation factor IF5A-like IPR008991; Translation protein SH3-like domain superfamily IPR012340; Nucleic acid-binding, OB-fold IPR014722; Ribosomal protein L2, domain 2 IPR019769; Translation elongation factor, IF5A, hypusine site IPR020189; Translation elongation factor, IF5A C-terminal
TdChr001.2852	218.29	299.94	121.84	111.4	96.34	208.82	287.94	117.24	189.34	92.01	71.62	153.31	192.15	694.73	104.93	88.61	192.26	212.42	1021.23	151.39	425.25	52.91	172.39	IPR006885; NADH dehydrogenase ubiquinone Fe-S protein 4, mitochondrial IPR038532; NADH dehydrogenase ubiquinone Fe-S protein 4-like superfamily
TdChr001.2838	277.44	215.56	119.18	106.2	91.31	310.36	290.64	124.65	155.23	135.48	97.55	118.3	138.12	143.52	140.56	114.51	157.43	154.67	185.23	69.87	233.57	61.73	73.91	IPR019174; NADH dehydrogenase 1, beta subcomplex, subunit 6
TdChr001.2822	137.92	202.69	54.47	86.77	90.9	43.34	74.22	51.29	156.04	43.75	83.05	119.95	67.04	55.25	214.04	149.7	132.35	87.39	68.47	65.79	136.08	63.84	708.81	IPR000426; Proteasome alpha-subunit, N-terminal domain IPR001353; Proteasome, subunit alpha/beta IPR016050; Proteasome beta-type subunit, conserved site IPR023332; Proteasome alpha-type subunit IPR029055; Nucleophile aminohydrolases, N-terminal
TdChr001.2796	25.07	57.76	25.15	28.24	37.52	36.65	74.98	65.95	137.06	68.6	74.4	173.67	245.57	906.94	103.66	99.74	169.49	281.71	1147.51	95.68	402.52	12.06	50.37	IPR000361; FeS cluster biogenesis IPR016092; FeS cluster insertion protein IPR035903; HesB-like domain superfamily
TdChr001.277	12.43	21.06	33.48	46.5	18.78	20.43	24.8	31.8	6.85	40.84	37.14	15.4	13.11	16.82	14.95	9.68	19.25	9.39	11.93	43.76	8.9	17.65	44.04	IPR018170; Aldo/keto reductase, conserved site IPR020471; Aldo/keto reductase IPR023210; NADP-dependent oxidoreductase domain IPR036812; NADP-dependent oxidoreductase domain superfamily
TdChr001.273	809.41	1585.25	1207.79	745.18	649.74	548.65	483.7	569.75	181.52	830.83	254.43	443.03	439.44	516.62	571.91	409.07	445.63	389.11	290.83	558.29	864.1	575.84	309.29	IPR002359; Ribosomal protein L6, conserved site-2 IPR020040; Ribosomal protein L6, alpha-beta domain IPR036789; Ribosomal protein L6, alpha-beta domain superfamily
TdChr001.2691	82.96	60.17	29.17	28.39	34.28	33.76	70.98	93.68	35.42	102.64	23.27	48.71	48.66	59.09	27.77	31.71	47.98	43.09	38.18	85.25	38.51	10.03	17.1	IPR003593; AAA+ ATPase domain IPR003959; ATPase, AAA-type, core IPR003960; ATPase, AAA-type, conserved site IPR015415; Vps4 oligomerisation, C-terminal IPR027417; P-loop containing nucleoside triphosphate hydrolase IPR028596; Katanin p60 subunit A1 IPR041569; AAA ATPase, AAA+ lid domain
TdChr001.267	14.08	268.1	185.97	459.28	95.52	104.12	58.15	49.14	222.77	45.23	57.86	46.92	76.2	44.43	334.68	135.26	60.01	93.05	41.31	35.24	74.1	939.48	24.66	IPR018170; Aldo/keto reductase, conserved site IPR020471; Aldo/keto reductase IPR023210; NADP-dependent oxidoreductase domain IPR036812; NADP-dependent oxidoreductase domain superfamily
TdChr001.2583	31.58	104.92	57.79	58.39	40.64	43.93	47.52	42.49	60.29	52.15	111.63	102.73	124.3	77.04	108.71	187.01	115.29	136.83	94.58	56.14	304.73	97.09	86.24	IPR004360; Glyoxalase/fosfomycin resistance/dioxygenase domain IPR029068; Glyoxalase/Bleomycin resistance protein/Dihydroxybiphenyl dioxygenase IPR037523; Vicinal oxygen chelate (VOC) domain
TdChr001.2542	47.88	43.46	20.24	26.15	22.61	17.12	22.02	21.11	24.86	26.94	15.51	28.82	18.75	21.76	35.71	24.98	38.33	19.65	21.5	36.29	29.79	11.93	41.77	IPR007233; Trafficking protein particle complex subunit IPR011012; Longin-like domain superfamily
TdChr001.2525	395.51	519.08	403.97	253.68	205.29	65.98	203.45	269.84	140.04	252.91	64.32	77.33	81.14	115.52	192.99	120.52	94.49	71.73	43.98	240.94	129.77	78.85	55.5	IPR000426; Proteasome alpha-subunit, N-terminal domain IPR001353; Proteasome, subunit alpha/beta IPR023332; Proteasome alpha-type subunit IPR029055; Nucleophile aminohydrolases, N-terminal IPR033812; Proteasome subunit alpha5
TdChr001.2512	9.09	48.33	11.71	9.31	46.47	19.53	5	7.77	22.98	19.7	25.88	59.92	67.6	44.95	41.94	33.29	57.23	58.05	61.33	22.05	53.04	0	49.11	IPR001792; Acylphosphatase-like domain IPR017968; Acylphosphatase, conserved site IPR020456; Acylphosphatase IPR036046; Acylphosphatase-like domain superfamily
TdChr001.2480	1261.34	696.99	448.8	412.55	637.7	510.15	894.97	1083.37	617.89	1024.26	440.41	1239.15	762.3	773.5	561.57	510.94	846.99	588	623.46	982.75	1046.23	380.61	76.99	IPR000626; Ubiquitin-like domain IPR019954; Ubiquitin conserved site IPR019956; Ubiquitin domain IPR029071; Ubiquitin-like domain superfamily
TdChr001.245	200.84	156.02	61.55	60.48	80.04	51.24	54.46	78.2	54.17	75.31	28.76	70.41	43.06	56.06	44.76	38.86	76.69	50.96	48.01	95.36	57.91	25.17	34.1	IPR001388; Synaptobrevin IPR010908; Longin domain IPR011012; Longin-like domain superfamily IPR042855; v-SNARE, coiled-coil homology domain
TdChr001.2443	73.5	12.51	13.02	19.51	42.86	10.47	33.46	35.93	53.61	15.59	43.36	14.97	25.45	16.91	6.66	5.18	2.01	3.25	12.3	20.09	95.56	6.93	19.73	IPR001275; DM DNA-binding domain IPR036407; DM DNA-binding domain superfamily
TdChr001.2371	59.45	292.09	103.02	163.7	593.14	148.45	106.97	81.48	329.31	50.7	185.36	428.7	232.73	349.46	360.73	1595.28	451.12	263.41	528.27	62.02	611.49	189.04	59.38	IPR000889; Glutathione peroxidase IPR036249; Thioredoxin-like superfamily
TdChr001.2358	969.15	2104.84	3594.81	2327.02	1864.41	997.59	1631.26	1912.91	506.7	2118.44	536.89	783.6	875.66	1154.78	1092.5	711.93	760.75	675.6	528.88	2186.98	1693.07	1318.29	321.72	IPR001377; Ribosomal protein S6e IPR014401; Ribosomal protein S6, eukaryotic IPR018282; Ribosomal protein S6e, conserved site
TdChr001.2350	570.45	1324.2	3298.13	1781.71	1439.56	1299.24	1081.64	1013.52	290.97	2082.94	529.13	828.14	810.6	1115.67	1001.77	721.74	790.01	663.33	536.45	2484.87	1454.27	1404.58	344.75	IPR001210; Ribosomal protein S17e IPR036401; Ribosomal protein S17e-like superfamily
TdChr001.2349	179.08	308.37	1445.16	809.91	629.69	498.83	515.59	505.56	158.59	913.15	278.78	456.27	379.72	517.33	489.63	385.62	378.92	315.58	275	630.17	695.31	661.55	330.23	IPR001210; Ribosomal protein S17e IPR036401; Ribosomal protein S17e-like superfamily
TdChr001.2213	836.84	970.5	248.5	261.01	228.07	201.8	224.4	213.58	184.47	243.23	190.17	208.9	196.43	208.5	211.49	229.43	227.28	228.27	182.5	420.5	422.59	186.19	469.88	IPR009582; Signal peptidase complex subunit 2
TdChr001.2167	123.69	166.62	89.69	75.93	60.79	42.22	56.69	63.42	18.61	58.38	27.34	35.37	36.13	38.72	38.41	30.51	38.09	28.69	23.83	89.36	67.72	27.92	17.54	IPR001680; WD40 repeat IPR015943; WD40/YVTN repeat-like-containing domain superfamily IPR017986; WD40-repeat-containing domain IPR036322; WD40-repeat-containing domain superfamily
TdChr001.2124	282.08	441.76	66.36	51.43	77.2	73.3	43.81	40.18	22.86	66.5	19.27	30.08	27.46	29.28	21.32	23.31	37.4	54.52	17.95	53.65	42.31	53.09	111.1	IPR029071; Ubiquitin-like domain superfamily
TdChr001.191	0	0	0	0	0	0	1.52	3.12	0	0.83	0	0	0.11	0.11	0	0	0	0.05	0	0.04	2.2	0	20.36	IPR001818; Peptidase M10, metallopeptidase IPR002477; Peptidoglycan binding-like IPR024079; Metallopeptidase, catalytic domain superfamily
TdChr001.1903	111.5	135.32	63.82	73.94	84.48	71.41	83.65	83.14	39.2	84.75	29.68	56.35	44.65	54.75	49.82	45.23	63.28	47.53	37.3	77.07	66.51	18.34	17.77	IPR004843; Calcineurin-like phosphoesterase domain, ApaH type IPR006186; Serine/threonine-specific protein phosphatase/bis(5-nucleosyl)-tetraphosphatase IPR011990; Tetratricopeptide-like helical domain superfamily IPR013026; Tetratricopeptide repeat-containing domain IPR013235; PPP domain IPR019734; Tetratricopeptide repeat IPR029052; Metallo-dependent phosphatase-like IPR041753; PP5, C-terminal …
TdChr001.190	0	0	0	0	0.13	0	3.23	5.36	0.1	0.86	0	0	0.19	0	0	0	0	0	0	0.37	4.24	0	281.71	IPR018487; Hemopexin-like repeats IPR036375; Hemopexin-like domain superfamily
TdChr001.172	250.83	314.92	52.16	36.72	22.93	21.72	40.07	60.62	25.13	115.47	44.52	13.34	11.96	39.59	73.86	11.7	19.34	9.95	17.8	89.3	9.99	21.84	38.81	IPR000245; V-ATPase proteolipid subunit IPR002379; V-ATPase proteolipid subunit C-like domain IPR035921; F/V-ATP synthase subunit C superfamily
TdChr001.1505	114.32	226.53	122.79	94.62	119.77	87.82	95.21	97.27	33.3	110.31	35.08	61.47	48.66	61.71	44.05	52.35	67.11	43.2	33.27	218.07	88.65	42.13	27.19	IPR000456; Ribosomal protein L17 IPR036373; Ribosomal protein L17 superfamily
TdChr001.149	0	0	0	0	0.32	0.19	3.25	3.46	0	3.15	0	0	1.05	0.88	0	0	0	0	0.27	0.1	4.27	0	342.83	IPR018487; Hemopexin-like repeats IPR036375; Hemopexin-like domain superfamily
TdChr001.148	0	0	0	0	0	0.89	6.53	6.95	0	1.95	0.37	0	0.14	0.42	0	0	0	0	0	0.18	3.25	0	67.17	IPR018487; Hemopexin-like repeats IPR036375; Hemopexin-like domain superfamily
TdChr001.147	26.3	19.37	32.63	27.08	25.2	13.99	25.24	34.06	8.71	47.47	7.25	17.99	11.36	21.02	12.69	9.75	16.95	10.4	8.77	47.22	10.97	9.13	104.64	IPR001261; ArgE/DapE/ACY1/CPG2/YscS, conserved site IPR002933; Peptidase M20 IPR011650; Peptidase M20, dimerisation domain IPR017153; Cytosolic nonspecific dipeptidase/DUG1
TdChr001.133	403.01	298.76	184.25	127.19	144.05	184.38	183.8	224.87	57.42	261.37	70.79	183.07	110.83	184.99	96.87	81.16	169.89	94.16	104.19	364.54	156.57	34.64	22.67	IPR003034; SAP domain IPR036361; SAP domain superfamily
TdChr001.1291	95.64	70.15	28.74	43.18	42.75	40.96	46.33	41.74	34.63	50.31	32.18	45.58	33.05	32.23	39.4	37.47	43.7	29.31	26.09	53.65	33.8	25.97	17.73	IPR001269; tRNA-dihydrouridine synthase IPR013785; Aldolase-type TIM barrel IPR018517; tRNA-dihydrouridine synthase, conserved site IPR035587; DUS-like, FMN-binding domain
TdChr001.1249	1166.91	810.14	299.24	207.03	203.63	181.33	269.26	316.19	80.77	504.39	83.07	158.01	159.8	240.77	128.12	130.13	167.13	143	98.88	494.13	193.86	102.01	132.36	IPR000504; RNA recognition motif domain IPR012677; Nucleotide-binding alpha-beta plait domain superfamily IPR035979; RNA-binding domain superfamily
TdChr001.1248	184.36	148.09	71.56	68.14	85.21	62.17	74.57	70.78	61.54	76.9	48.26	122.99	71.53	73.45	61.18	68.65	113.36	98.81	89.56	107.79	154.75	28.32	43.58	IPR000504; RNA recognition motif domain IPR012677; Nucleotide-binding alpha-beta plait domain superfamily IPR034637; Negative elongation factor E, RNA recognition motif IPR035979; RNA-binding domain superfamily
TdChr001.1243	537.45	546.43	150.57	92.61	149.95	110.67	129.23	183	34.32	195.15	41.03	77.42	71.91	147.82	72.13	44.4	87.56	61.64	68.51	170.97	41.58	21.92	24.91	IPR011989; Armadillo-like helical
TdChr001.1177	22.82	32.42	11.18	16.31	20.2	17.61	22.93	16.56	36.97	11.44	20.49	54.99	72.04	43.59	54.31	31.55	59.52	90.43	60.83	14.92	50.07	10.1	18.4	IPR009450; Phosphatidylinositol N-acetylglucosaminyltransferase subunit C
TdChr001.115	51.35	84	106.57	99.87	124.14	156.4	226.03	222.44	135.45	265.13	90.9	144.64	186.28	303.47	186.97	111.84	177.54	219.06	351.52	252.6	175.46	39.3	27.02	IPR006708; Pex19 protein IPR038322; Pex19, C-terminal domain superfamily
TdChr001.1130	11.91	72.16	56.41	76.45	25.79	20.7	50.83	34.62	104.82	29.73	66.12	97.8	52.21	79.11	26.74	13.25	113.46	54.95	165.26	27.57	31.98	0.44	42.82	IPR001944; Glycoside hydrolase, family 35 IPR008979; Galactose-binding-like domain superfamily IPR017853; Glycoside hydrolase superfamily IPR019801; Glycoside hydrolase, family 35, conserved site IPR026283; Beta-galactosidase 1-like IPR031330; Glycoside hydrolase 35, catalytic domain
TdChr001.1084	330.17	278.89	157.42	131.11	152.88	99.41	169.57	218.27	111.19	181.07	67.06	89.12	54.9	81.66	112.45	75.48	106.91	93.66	62.02	292.6	115.78	45.24	59.19	IPR005351; Uncharacterised protein family UPF0139
TdChr001.1044	51.84	58.87	19	16.16	39.92	14.2	105.87	186.52	120.43	259.41	17.3	27.2	33.95	108.88	16.76	31.47	34.67	35.79	76.53	323.74	34.5	4.73	347.64	IPR006840; Glutathione-specific gamma-glutamylcyclotransferase IPR013024; Gamma-glutamyl cyclotransferase-like IPR036568; Gamma-glutamyl cyclotransferase-like superfamily
TdChr001.1027	45.81	150.07	23.89	28.12	10.12	82.34	70.47	61.16	169.88	50.82	223.54	243.13	87.36	125.21	149.63	303.7	193.48	107.99	124.77	59.99	341.85	30.18	33.43	IPR000008; C2 domain IPR035892; C2 domain superfamily
TdChr001.1023	499.6	168.34	65.8	27.58	11.67	34.98	189.83	202.8	1.19	209.74	2.12	1.15	23.87	58.11	26.85	1.61	0.83	4.36	2.14	366.93	6.65	3.86	371.06	IPR018737; Protein LIN52
TdChr006.971	0	0	0	0	0	0	18.47	0	126.64	0	0	0	0	0	27.2	0	0	0	0	0	0	0	21	NA
TdChr006.722	155.2	482.64	90.15	44.12	57.86	65.41	25.13	32.01	15.32	71.52	27.07	33.32	20.69	27.83	40.87	94.02	35.5	22.16	39.46	56.34	36.52	9.48	34.26	NA
TdChr006.596	0	0.46	0	0	0.47	2.98	79.77	130.56	0.17	43.8	0.22	0	9.65	13.19	0.26	0.22	0.34	4.85	0	3	112.05	0	46753.6	NA
TdChr006.431	71.92	88.07	70.73	58.49	59.63	50.82	51.02	49.58	27.88	69.3	22.04	50.79	32.89	49.65	56.86	31.68	56.84	36.72	31.68	68.06	47.78	21.27	70	NA
TdChr006.403	0	0	0	0	0	0.45	25.43	23.87	0	13.35	0.45	0	4.56	6.26	0	0	0	0.96	0	0	26.17	0	13297.2	NA
TdChr006.385	0	0	0	0	0	2.98	60.84	104.14	0	15.57	0.89	0	5.52	1.84	0.35	0	0.47	2.07	0	2.03	32.61	0	311.34	NA
TdChr006.2184	2.95	31.68	20.73	48.42	47.52	137.73	69.07	39.24	50.79	41.88	282.21	54.86	77.38	68.81	266.04	149.53	48.58	153.44	98.9	48.32	257.72	0	51.55	NA
TdChr006.2035	161.48	72.81	43.14	35.81	85.97	35.36	41.21	32.66	41.15	4.34	2.96	18.59	2.28	7.07	1.64	1.15	0.79	1.93	6.34	12.1	0	7.97	205.5	NA
TdChr006.2029	0	0	0	0	0	0	0	0	0	0	0	0	0	0	0	0	0	0	0	0	0	0	19.62	NA
TdChr006.1834	499.57	289.61	299.65	858.16	11.92	33.36	88.81	105.51	38.55	113.11	14.81	26.56	22.92	51.56	39.13	39.62	44.71	27.52	41.68	155.88	8.45	556.29	1018.71	NA
TdChr006.1672	0	0.11	0	0	0	0	5.8	8.03	0.04	2.97	0	0.19	0.68	0.73	0	0	0.14	0.06	0.19	0.3	3.58	0	1560.41	NA
TdChr006.1284	0	0	0	0	0	0	0	0	0	0	0	0	30.67	0	3.65	6.63	0	0	0	0	9.07	0	24.39	NA
TdChr006.1060	0	7.15	0	0	103.61	0	3.05	30.92	78.22	0	0	144.84	54.99	36.57	160.92	35.65	256.72	83.89	458.09	0	91.99	10.74	28.46	NA
TdChr006.1032	2.24	4.23	0.03	33.12	11.03	6.82	66.7	89.95	13.79	41.11	69.02	9.71	34.96	14.16	34.53	37.48	9.16	58.13	14.23	18.75	154.1	1.34	23204.4	NA
TdChr005.343	49.55	96.73	36.92	35.55	60.17	49.22	44.52	39.41	39.03	31.17	26.46	79.79	35.78	32.31	45.16	32.38	75.4	32.06	28.76	56.12	53.43	14.37	115.75	NA
TdChr005.129	0	0	0	0	0	0.51	50.3	74.98	0	21.78	0	0.38	3.71	4.97	0	0.09	0	0.77	0	3.15	46.59	0	70809.9	NA
TdChr005.114	0	0	0	1.44	0.72	0	20.2	38.71	147.51	0	9452.54	1871.28	2901.15	51.05	5.94	2361.45	2225.43	3671.58	2.61	0	2093.47	0	46.79	NA
TdChr004.1695	0	0.06	0.02	0.07	0.17	0	4.72	8.35	0.69	1.79	0.33	0.8	0.5	0.79	0	0.19	1.03	0	0.04	0.12	4.68	0.36	602.06	NA
TdChr004.123	0	0	0	0	0	0	28.35	19.22	0	16.85	0	0	0	5.65	0	0	0	0	0	0	9.07	0	7840.97	NA
TdChr003.949	29.35	67.95	111.89	122.73	65.1	0	118.47	138.42	66.71	130.81	19.66	8.7	11.86	59.31	42.32	34.58	11.53	10.04	0	226.4	0	31.66	16.68	NA
TdChr003.751	0.87	15.32	0.55	0.12	0.06	0.21	1.29	2.57	0	0.23	0	0	0.08	0.33	0	0	0.09	0	0	0.47	2.43	16.85	606.32	NA
TdChr003.678	37.88	16.59	0	0	0	0	0.52	0.77	1.04	0	0	0	0	0	0	0	0	0	0	0	1.11	0.32	179.33	NA
TdChr003.659	0	0	0	0	0	0	7.77	16.31	0	8.4	1.78	0	0	0	0	0	0	0	0	0	2.69	0	2240.54	NA
TdChr003.595	0.64	0.47	0	0	0.07	0.49	22.56	36.63	0	12.19	0	0.14	1.89	2.23	0	0.13	0.1	0.84	0	1.12	23.4	0	12321.4	NA
TdChr003.594	0	0	0	0	0	0.79	9.94	16.63	0	6.3	0.1	0	1.36	2.02	0	0	0	0.3	0.15	0.74	15.19	0	5305.31	NA
TdChr003.593	0	0	0	0	0	0	0	0	0	0	0	0	0	0	0	0	0	0	0	0	0	0	28.46	NA
TdChr003.414	87.25	117.99	88.39	122.36	240.14	121.17	124.51	119.85	203.29	119.29	151.35	325.57	171.95	152.13	155.44	195.78	276.28	185.78	201.93	63.33	148.33	60.61	22.88	NA
TdChr003.313	0	0	0	0	0	0.04	6.62	8.3	0.02	1.43	0	0	0.18	0.58	0	0.07	0	0.07	0	0.06	2.6	0	372.44	NA
TdChr003.312	0	0	0	0	0.02	0	8.3	13.89	0	2.68	0	0	0.41	0.71	0	0	0	0.09	0	0.46	8.58	0	853.43	NA
TdChr003.311	0	0	0	0	0.02	0	5.19	10.45	0.01	2.08	0.05	0	0.21	0.53	0	0	0	0.11	0	0.36	5.76	0	767.92	NA
TdChr003.310	0	0	0	0	0.02	0	7.15	13.44	0	1.78	0	0	0.17	0.32	0	0.01	0	0.03	0	0.27	4.63	0	251.9	NA
TdChr003.309	0	0.04	0	0	0	0.06	15.56	25.79	0.01	5.3	0.06	0	1.35	1.05	0	0	0	0.3	0	0.84	18.6	0	672.03	NA
TdChr003.307	0	0	0	0	0.02	0	16.32	24.76	0	4.23	0.08	0	0.72	0.67	0	0.02	0	0.14	0	0.71	12.22	0	2108.73	NA
TdChr003.269	0	0	0	0	0	2.32	28.45	33.83	0	6.82	0.56	0	0.87	0	0	0	0.87	0	0	0.77	7	0	59.9	NA
TdChr003.1978	0	0.49	0.43	0.23	0.46	10.79	4.82	1	9.99	0.75	16.39	7.67	13.89	2.24	10.71	246.67	3.42	10.77	1.48	0.63	90.02	0.11	47.71	NA
TdChr003.1967	8.11	0	0	0	0	0	5.86	9.08	60.21	6.46	35.57	93.62	60.1	26.66	136.3	49	57.12	90.22	15.35	1.28	1.26	0	31.9	NA
TdChr003.1696	63.51	38.55	166.59	305.22	142.08	101.06	149.77	156.25	124.35	51.54	40.32	106.11	21.22	43.05	33.93	13.72	19.09	5.98	25.12	112.11	1.01	205.32	74.7	NA
TdChr003.1640	115.83	58.09	34.28	17.47	53.56	34.68	58.42	97.79	15.11	185.56	13.9	43.81	23.68	83.53	19.76	24.49	37.53	18.85	11.12	131.91	22.43	1.85	18.04	NA
TdChr003.1459	118.18	162.39	124.07	100.13	110.8	179.01	167.4	159.75	117.21	226.6	175.07	362.83	226.13	197.26	184.54	216.41	389.19	272.21	255.22	201.23	152.48	17.28	46.52	NA
TdChr002.873	126.29	173.13	128.42	93.84	64.08	102.33	150.75	110.26	65.76	122.97	27.44	66.41	60.23	74.84	51.34	42.69	96.95	56.51	56.52	188.89	122.16	33.27	22.65	NA
TdChr002.395	148.9	140.43	185.03	156.44	101.09	61.87	111.03	115.31	127.52	138.53	96.72	214.4	126.14	135.17	162.72	163.5	229.43	133.36	131.17	113.87	174.15	75.87	41.99	NA
TdChr002.3663	0	0.8	0.39	0.09	0	2.46	0	0.09	0.18	0	4.2	0.49	0.18	0.53	0.42	3.61	0.94	0.83	0	0.23	0.2	0	21.81	NA
TdChr002.3263	119.73	149.83	121.82	121.51	100.83	293.31	318.1	122.9	209.04	114.28	83.62	147.18	139.97	264.88	118.11	102.42	177.87	154.26	336.4	140.97	284.85	44.32	32.07	NA
TdChr002.2814	0	0	0	0	0	0.23	48.08	93.34	0.48	32.14	0.66	0.86	13.55	12.51	0.19	0.1	0.15	2.42	0.66	2.14	66.63	0	5646.58	NA
TdChr002.2496	120.96	71.69	27.57	24.43	29.4	29.01	77.95	80.29	49.04	75.01	27.42	43.81	41.02	79.34	38.11	36.41	50.14	55.49	87.75	100.01	53.33	5.17	45.3	NA
TdChr002.2393	0	0	0.95	0	0	0.56	45.63	5.04	606.79	0.4	0.56	0	0	1.29	1023.12	1185.09	0.44	3.89	0.38	0	1329.36	0.8	17.78	NA
TdChr002.2319	51.05	81.27	13.83	24.95	45.21	15.57	11.64	5.13	19.91	0.8	18.61	57.27	18.99	14.83	11.06	16.67	32.08	18.7	18.4	1.6	23.5	5.93	21.4	NA
TdChr002.1824	132.63	132.55	45	46.22	56.61	38.3	72.86	80.8	51.79	72.01	26.37	47.94	38.07	51.47	43.46	41.14	49.15	52.52	37.41	92.83	89.99	20.25	108.85	NA
TdChr002.1025	0	0	0.01	0	0	0.13	14.86	18.91	0	3.59	0.07	0	0.65	0.55	0.02	0	0	0.18	0.05	0.59	8.12	0.02	330.8	NA
TdChr001.844	22.77	30.42	3.01	3.02	20.72	12.69	30.5	17.63	13.61	41.32	26.13	13.15	75.94	27.7	29.26	43.26	15.33	98.04	21.18	39.39	42.14	86.33	64.83	NA
TdChr001.842	481.19	82.66	254.85	3395.9	372.96	238.52	751.67	886.53	1197.24	805.71	564.93	1231.41	5372.5	973.07	722.99	995.78	1423.23	5842.11	825.21	909.5	1921.86	18161.1	625.16	NA
TdChr001.776	0	0	0	0	0.18	1.99	168.53	305.7	0	93.03	0.85	0	24.41	26.14	0	0.18	0	5.78	0	8.65	127.01	0	2469.82	NA
TdChr001.775	0	0.41	0	0	0	1.47	8.17	9.79	0	4.53	0	0	0.87	0.86	0.22	0	0	1.06	0	0.39	6.34	0	19.74	NA
TdChr001.774	0	0	0	0	0	0.58	45.84	82.69	0	20.45	0.57	0	9.78	9.33	0	0.29	0	1.2	0.79	2.93	53.32	0	14172.7	NA
TdChr001.773	0	0	0	0	0	0	1.79	0.42	0	0.26	0	0	0.28	0.28	0	0	0	0	0	0	0.62	0	80.32	NA
TdChr001.772	0	0	0	0	0	0	0.31	0.21	0	0.76	0	0	0	0	0	0	0	0	0	0.14	0.47	0	18.48	NA
TdChr001.771	0	0	0	0	0	0	27.92	57.86	0	16.51	0	0	7.76	5.57	0	0	0	6.65	0	0	60.87	0	1043.42	NA
TdChr001.770	0	0.64	0	0	0	0	13.46	13.86	0	2.91	0	0	1.02	0.51	0	0	0	0	0	0	11.82	0	62600.5	NA
TdChr001.405	0	0	0	0	0	0.24	21.68	29.62	0	13.49	0.38	0	3.3	3.04	0	0	0	1.97	0	0.63	41.43	0	35431.1	NA
TdChr001.403	0	0	0	0	0	0	8.85	14.04	0	3.71	0.23	0	0.35	0.69	0	0	0	0.49	0	0.57	5.79	0	14366	NA
TdChr001.369	0	0	0	3.49	0	62.83	873.93	1579.01	131.59	730	18.46	40.93	13.89	124.14	317.17	4.5	40.47	0	23.34	459.99	1757.11	0	46.29	NA
TdChr001.3404	1117.57	1946.63	593.44	506.85	366.31	1076.44	856.94	330.86	634.41	474.46	250.97	810.27	782.04	921.28	585.44	381.9	635.19	1035.81	1244.63	589.18	1218.26	405.01	19.62	NA
TdChr001.3394	0	0	0	0	0	0	5.55	6.97	0.09	1.69	0	0	0.67	0.99	0	0	0.18	0.16	0	0	4.2	0	14021.6	NA
TdChr001.3237	0	0	0.01	0.02	0	0.35	33.39	51.01	0	9.63	0.13	0	2.93	1.61	0	0	0	0.24	0	1.2	16.61	0.47	1389.77	NA
TdChr001.3082	0.9	7.99	0	0	3.29	3.69	10.08	6.55	20.5	2.72	7.14	10.32	47.94	16.11	36.07	4.8	3.69	22.71	11.15	0	294.74	6.42	853.97	NA
TdChr001.3081	2839.15	223.62	4.72	1.53	0.92	87.85	1035.92	1824.84	57.94	2014.35	40.15	30.26	138.59	690.85	41.81	43.94	23.76	47.83	35.52	1701.41	208.1	50.43	177.34	NA
TdChr001.3061	11.73	0.56	0	819.41	1.8	1.67	12.35	14.06	3.82	6.86	0	3.58	0.86	9.88	20	0	3.95	1.17	16.74	8.13	0	0	168.26	NA
TdChr001.3023	0.26	0	0	0	0	0.32	19.19	26.02	0.03	6.48	0.09	0.09	2.02	1.9	0	0	0	0.12	0	0.84	19.08	0	9472.42	NA
TdChr001.2776	18.96	236.44	23.89	119.34	565.12	313.33	137.39	83.45	682.07	15.17	151.94	1043.21	546.86	607.63	442.13	193.15	684.15	423.61	1057.29	10.53	335.19	66.46	103.7	NA
TdChr001.2769	25.79	130.91	27.64	57.55	144.57	90.32	48.49	14.46	103.32	0.62	27.35	65.27	53.31	21.47	32.71	49.58	69.35	54.35	58.89	1.54	67.45	116.63	36.56	NA
TdChr001.2758	36.55	401.02	77.41	429.59	2025.95	1287.6	460.54	277.25	2178.56	50.91	536.78	3766.44	1954.08	2255.33	1565.78	677.9	2501.12	1540.84	3246.25	47.56	1297.94	159.27	375.3	NA
TdChr001.1649	51.05	81.27	13.83	24.95	45.21	15.57	11.64	5.13	19.91	0.8	18.61	57.27	18.99	14.83	11.06	16.67	32.08	18.7	18.4	1.6	23.5	5.93	21.4	NA
TdChr001.113	0.23	0.1	0.08	0.23	0.97	1.17	9.5	14.28	13.18	5.39	0.08	0.33	0.71	2.72	17.34	0.81	2.71	2.91	4.2	0.59	12.01	1.89	4516.14	NA
TdChr001.1003	192.51	268.9	98.68	51.36	36.43	35.82	49.53	64.07	9.99	61.7	16.52	21.54	24.94	30.99	29.32	28.44	33.89	27.67	13.52	85.67	36.77	23.71	17.59	NA
