# Supplementary material for: Coordinated molecular and ecological adaptations underlie a highly successful parasitoid
Source: eLife. 2024 Jun 21;13:RP94748. doi: 10.7554/eLife.94748 (PMC11192535; doi:10.7554/eLife.94748)
Supplement: Supplementary file 4. [file elife-94748-supp4.xlsx]

## Sheet: Supplementary file 4
Supplementary file 4 List of Td teratocyte genes
Gene ID	Egg	Larva stage1	Larva stage2	Larva stage3	Pupa stage1	Pupa stage2	Pupa stage3	Female adult	Male adult	Female abdomen	Female antenna	Female head	Female leg	Female thorax	Male abdomen	Male antenna	Male head	Male leg	Male thorax	Ovary	Ovipositor	Venom	Teratocyte	Specific index in Teratocyte	High expression in Teratocyte	Label	PFAMs
TdChr006.1480	0	5.99	75.71	8.74	3.29	0	1.37	0	1.78	0	2.38	0	0	4.74	4.08	1.8	0	1.62	7.97	0	0.92	0	43031	9540.9	Yes	Other or none function	OS-D
TdChr005.153	8.04	518.67	975.32	96.58	0.67	0	0.93	0	6.31	0	0	0	0	0	3.88	79.36	0	1.4	0	0	0	0	37169.4	5109.21	Yes	Other or none function	NF
TdChr001.1112	0	0	225.73	155.71	15.17	15.17	373.36	191.68	698.73	65.53	32.85	600.16	147.63	355.46	934.55	6.35	620.25	49.77	511.82	179.73	414.52	0	36945.8	83.7003	Yes	Other or none function	NF
TdChr005.155	0.26	120.89	6.8	19.99	0	0	0	0	0	0	0	0	0	0	0	0	0	0	0.19	0	0	0	19839.5	101741	Yes	Other or none function	NF
TdChr001.974	2.61	249.84	159.69	89.98	4.05	0	2.82	0.08	1.07	0.15	0	0	0	0	0	0	0	0	0	0.61	0.18	2.13	19124.3	6793.69	Yes	Other or none function	NF
TdChr001.3395	2.15	119.36	101.75	789.5	90.03	798.06	2063.42	1656.46	8821.11	250.25	7219.16	6307.51	13233.4	3024.54	4377.32	8194.31	6630.81	17285.8	4016.2	319.9	41908.2	1207.56	18541.2	2.16953	Yes	Other or none function	OS-D
TdChr001.842	481.19	82.66	254.85	3395.9	372.96	238.52	751.67	886.53	1197.24	805.71	564.93	1231.41	5372.5	973.07	722.99	995.78	1423.23	5842.11	825.21	909.5	1921.86	625.16	18161.1	23.5872	Yes	Other or none function	NF
TdChr006.976	13.7	216.14	61.23	7.41	13.43	26.44	47.54	40.61	13.77	48.37	16.01	18.8	23	25.67	19	21.55	34.81	25.75	19.47	77.07	31.23	0.09	16367.9	610.471	Yes	Other or none function	Carb_anhydrase
TdChr005.1397	6.5	878.5	61.2	9.42	0	0	0.77	0	0	1.52	0	0	0	1.56	0	1.93	4.42	0	1.27	4.67	0	0	15943.3	3432.2	Yes	Other or none function	NF
TdChr006.2176	1.96	164.2	66.41	5	15.74	0.34	1.32	0.68	0	0	0.18	0	0.81	0	0	0	0	0	0	0.55	0	0	15216.2	8744.87	Yes	Other or none function	NF
TdChr005.149	4.51	533.08	489.88	1772.33	80.15	51.64	29.95	0	2.27	0	0	0	0	0	1.24	0.1	0	0.53	0.77	0.63	0	4.23	13773	336.772	Yes	Other or none function	NF
TdChr001.2448	3.78	271.09	14875.5	6286.35	22.18	3.89	629.49	774.26	5566.07	77.31	1375.9	4714.78	4645.94	3290.43	2172.74	2015.73	4072.77	5524.71	4090.42	1.48	89.36	0	13200.4	2.43299	Yes	Other or none function	NF
TdChr002.471	0	7.64	79.01	3.48	0	0	0	0	0	0	0	0	0	0	0	0	0	0	0	0	0	0	12800.5	128006	Yes	Other or none function	NF
TdChr002.3578	209.44	1822.72	553.48	919.82	1228.29	86.02	914.98	551.9	1888.22	262.91	4545.52	1249.85	1410.27	903.29	1214.27	657.35	865.22	1241.8	1000.14	197.06	1540.48	181.26	12174.7	14.4764	Yes	proteinase_inhibitors (Digestion-Other)	Serpin
TdChr005.552	0	22.91	55	19.56	3.29	0	2.22	0	0.64	0.85	0	0	0	0.3	32.7	0	0	0.87	0.56	0.5	0	0.47	12139	4251.7	Yes	Other or none function	NF
TdChr004.679	1.15	115.02	13.64	6.02	0.44	0.13	0.29	0.07	0.04	0.03	0.02	0.24	0	0.07	0	0	0.07	0	0	0.02	0	0.11	11931.3	26222.8	Yes	Other or none function	NF
TdChr002.2345	0.28	21.2	6.55	6.04	0.89	0.08	0.39	0.07	0.01	0	0	0.03	0.02	0.02	0	0	0	0	0.04	0.06	0	0.34	11769.5	25310.9	Yes	Other or none function	NF
TdChr002.2335	21.51	1920.25	52.98	243.28	49.5	4.21	9.86	7	50.33	0.19	6.68	71.46	151.74	12.76	25.46	8.99	271.04	163.66	20.97	0.69	5.63	0.13	10636	101.227	Yes	proteinase_inhibitors (Digestion-Other)	Kazal_1,Kazal_2
TdChr005.1237	9.71	1003.99	93.85	2.91	0.11	0	0.47	0.41	0.16	0	0	0	0.16	0	0	0	0	0.3	0	0.31	0	0	10163.7	18821.7	Yes	Other or none function	NF
TdChr001.110	1.63	142.56	44.36	23.71	1.81	0	3.16	0	0.29	0	0	0	0	0	0	0	0	0.13	0	0	0	0.26	10156.5	5580.54	Yes	Other or none function	NF
TdChr003.742	828.56	1395.08	17456.9	12096.2	10668.8	5473.94	7912.41	9414.96	2126.99	11096.1	1441.02	2727.47	2505.4	4550.24	3500.28	2049.99	2067.9	1936.99	1611.35	12152.9	5287.71	617.35	9604.77	0.812161	Yes	Ribosom	Ribosomal_L37e
TdChr004.1548	1.98	125.31	35.11	421.95	2417.68	3.12	1.47	0.55	0.14	1.26	1.42	2.27	0.27	0	0.42	0	1.7	0	0	0.92	0	0	9313.41	3417.34	Yes	Other or none function	NF
TdChr005.557	0.22	28.62	19.79	0.76	0	0	0	0	0	0	0	0	0	0	0	0	0	0	0	0	0	0	8819.08	88191.8	Yes	Other or none function	NF
TdChr006.1435	5.72	412.69	595.23	531.71	10.63	0.22	3.53	0	0	0	0	0	0	0	0	0	0	0	0	0.11	0	1.39	8071.81	1708.34	Yes	Other or none function	NF
TdChr004.1924	0	69.68	28.85	3.14	0.58	0	0.54	0.28	0	0	0	0	0	0	0.21	0	0	0	0	0	0.91	0	8015.06	12144.2	Yes	Other or none function	NF
TdChr002.708	0.32	52.45	1123.05	84.96	30.17	7.31	1.54	0.13	0.53	0	0	0	0	0.26	0.2	0.18	0.81	0.72	0.24	0	0	0.96	7285.32	1633.43	Yes	Other or none function	Pyrid_oxidase_2
TdChr001.759	35.61	3059.14	1038.62	975.16	2363.7	1068.39	2654.26	259.94	543.1	64.74	523.17	532.08	2266.36	370.27	770.82	1213.17	731.37	3298.82	618.99	158.84	403.91	0	7277.77	4.83931	Yes	Other or none function	SVWC
TdChr005.144	0	1.34	36.4	3.7	0.72	0	0.57	0	0	0	0	0	0	0	0	0	0	0	0	0	0	0.09	7271.96	16911.8	Yes	Other or none function	NF
TdChr005.157	12.13	962.47	57.37	49.83	1.78	0	0.11	0.12	0.23	0.42	0	0	0	0	0.18	0	0	0	0	0.46	0	0	6751.05	5533.64	Yes	Other or none function	NF
TdChr001.2805	17.9	294.42	40.53	274.39	41.79	7.83	78.81	83.47	541.48	6.7	813.9	262.93	1397.73	327.22	317.69	967.03	382.19	1607.78	627.05	1.23	612.14	0.06	6375.16	10.5108	Yes	Serine_type_endopeptidases (Digestion-Trypsin)	CLIP,Trypsin
TdChr002.2309	25	2287.32	72.47	5.12	0.14	0	0.05	0	0.05	0	0	0	0.1	0	0	0.07	0	0	0.54	0	0	0.18	6130.64	13327.6	Yes	Other or none function	NF
TdChr005.148	0.97	121.47	28.98	22.64	4.66	1.53	0.68	0.08	11.08	0	0.1	0.64	3.54	0.3	5.47	154.36	3.38	32.42	2.79	0	0.87	5.8	6001.99	368.019	Yes	Other or none function	NF
TdChr003.1783	22.41	1518.33	55.2	916.2	314.12	7.61	132.6	58.06	331.84	6.37	140.11	267.02	576.37	265.42	241.69	181.08	347.4	624.65	495.21	2.66	332.06	3.63	5836.63	15.2733	Yes	Lysozymes (Digestion-Other)	Destabilase
TdChr002.3550	2.53	163.92	54.07	43.4	8.14	68.83	2.12	0.21	1.9	0.15	0.05	0	0	0.55	1.49	0.27	0	0.08	0.22	0.6	0.94	0.05	5753.79	1081.45	Yes	Carboxypeptidases (Digestion-Other)	Peptidase_M14,Propep_M14
TdChr001.3238	10.44	29.11	1.88	0.04	0.03	0.05	0	0	0	0	0	0	0	0	0.03	0	0	0	0	0	0	0	5558.84	41177.3	Yes	Metallopeptidases (Digestion-Other)	NF
TdChr002.2311	11.14	451.23	75.33	2.23	0.39	0.51	0.4	0.28	1.2	0	0.45	5.47	1.09	1.47	0	1.48	7.6	1.27	1.74	0	0	0	5159.62	1426.98	Yes	Other or none function	NF
TdChr005.519	137.9	246.05	310.88	195.88	2.07	18.05	53.76	26.26	141.66	1.19	11.21	540.37	26.67	89.17	39.08	7.26	544.79	28.71	108.98	3.07	42.87	0	5106.92	32.8329	Yes	Other or none function	NF
TdChr003.2044	4	385.48	16.67	2.71	0.56	0.11	0.13	0.05	0.05	0	0	0.48	0	0	0.04	0	0.65	0	0	0	0	0.05	5042.98	7153.23	Yes	Other or none function	Hemocyanin_C,Hemocyanin_M,Hemocyanin_N
TdChr005.156	0.64	159.52	43.49	1.13	0	2.36	0.88	0.58	0	0	0	0	0	1.21	0	0	0	0	0	1.42	0	0	4784.17	3767.14	Yes	Other or none function	NF
TdChr006.392	1.32	182.6	31.74	351.57	0.39	0.11	1.37	1.72	19.38	0	5.86	12.36	52.04	7.38	5.68	10.4	12.85	73.24	11.48	0.06	10.36	0	4712.88	193.404	Yes	Serine_type_endopeptidases (Digestion-Trypsin)	Trypsin
TdChr001.2816	6.93	701.66	39.01	1.57	0.09	0	0.12	0	0	0	0	0	0	0	0	0.09	0	0	0	0	0	0	4694.98	22902.8	Yes	Serine_type_endopeptidases (Digestion-Trypsin)	CLIP,Trypsin
TdChr001.2608	3.13	287.21	21.25	1.86	0.12	0.14	0.2	0.03	0	0.1	0	0	0	0	0	0	0	0	0	0	0	0.03	4544.29	16831.1	Yes	Metallopeptidases (Digestion-Other)	NF
TdChr003.782	2.64	0.28	1098.53	6528.9	3.5	1386.87	1686.93	5.03	157.22	0.32	0.06	0.85	1.15	0.09	6.49	0.06	2.7	0.5	6.37	0.17	1.94	0.05	4461.18	54.6034	Yes	Hydrolase (Digestion-Other)	CN_hydrolase
TdChr006.1476	0	0	21.67	554.85	6868.34	0	0.63	0.58	0	0	0	0	0	0	0	0	0	0	0	0	3.64	0	4179.23	5928.13	Yes	Other or none function	OS-D
TdChr003.1939	3.37	353.83	16.66	248.55	42.63	3.37	48.54	13.25	61.79	4.14	30.55	99.34	84.61	69.32	82.08	15.43	44.08	101.52	96.01	1.47	6.82	0	4085.61	50.2847	Yes	proteinase_inhibitors (Digestion-Other)	Kazal_1,Kazal_2
TdChr001.3578	412.47	795.15	8995.02	5889.11	5417.73	4110.75	4653.41	5121.58	1223.39	6860.27	1017.03	1562.61	1595.54	2858.84	2303.92	1308.82	1476.41	1292.14	993.07	10263.5	3537.65	3.32	4024.85	0.474135	Yes	Ribosom	Ribosomal_S25
TdChr004.118	154.21	335.18	8613.29	5835.13	5189.25	4356.98	4315.29	4728.04	1315.57	7331.19	1529.07	2357.42	2656.75	3986.28	3201.39	2258	2188.49	2032.62	1584.56	8395.16	3733.27	7.38	3983.28	0.286022	Yes	Ribosom	Ribosomal_S26e
TdChr004.826	6081.57	4363.9	9633.05	7193.15	4602.39	2400.79	5041.8	6962.4	903.97	7397.59	758.14	1325.77	1485.9	2956.82	2165.72	1016.18	1321.75	990.59	908.27	6339.31	1632.31	26.11	3579.34	0.268313	Yes	Ribosom	Ribosom,GTP_EFTU,GTP_EFTU_D2,GTP_EFTU_D3
TdChr004.1260	1982.89	3249.21	6073.32	4363.96	3493.76	3840.04	3028.97	3550.25	872.46	5637.65	1187.13	1692.86	2005.17	3054.34	2336.37	1375.53	1640.53	1512.36	1170.67	4965.5	2497.78	1444.02	3563.56	0.538171	Yes	Ribosom	Ribosomal_L14
TdChr001.1070	5.14	579.27	212.04	394.26	207.39	18.96	96.6	37.34	184.31	12.63	72.57	279.29	191.11	122.45	491.22	158.81	397.51	215.22	248.6	2.51	301.46	0.15	3456.34	13.8643	Yes	Serine_type_endopeptidases (Digestion-Trypsin)	Trypsin
TdChr001.3010	0	112.76	19.07	7.56	0	0	0	0	0	0	0	0	0	0	0	0	0	0	0	0	0	0	3450.2	34503	Yes	Other or none function	NF
TdChr005.2149	23.95	2249.15	30.14	15.08	0.06	0	0.09	0	0.28	0	0	0	0	0.34	0.63	0	0.19	0.17	0.16	0	0.2	0	3406.33	5822.68	Yes	proteinase_inhibitors (Digestion-Other)	Serpin
TdChr005.1460	862.03	1665.9	11423.1	7887.92	5737.14	2840.85	5102.25	5764.62	1566.95	5013.61	1048.84	1428.23	1396.83	2257.59	1801.58	1422.52	1330.85	1196.64	1065.31	12917.7	3437.32	1.41	3406.05	0.43435	Yes	Ribosom	Ribosomal_L44
TdChr004.366	4336.39	1568.9	4502.88	1555.83	1659.02	1732.34	7328.62	12305.5	975.87	12223.8	1220.65	884.51	2254.38	4670.67	1682.95	1504.37	880.12	1011.23	760.06	3163.34	1580.79	9.65	3326.56	0.614088	Yes	Other or none function	HSP70
TdChr001.2811	9.41	1015.03	38.8	0.29	0	0	0	0	0	0	0	0	0	0	0	0	0	0	0	0	0	0	3116.7	31168	Yes	Serine_type_endopeptidases (Digestion-Trypsin)	CLIP,Trypsin
TdChr004.767	333.6	561.65	5836.44	4162.04	2981.04	2394.03	2745.79	3208.52	732.49	4185.08	793.24	1220.78	1108.33	1783.31	1468.39	810.73	1087.27	972.94	681.87	3830.64	1863.63	12.77	3065.45	0.719001	Yes	Ribosom	Ribosomal_L37ae
TdChr005.553	4.54	452.91	61.68	20	6.11	0.19	3.16	0.23	0.31	0	0	0	0	0	0.12	0	0.94	0.28	0.14	0.38	0	0.09	3056.88	773.861	Yes	Other or none function	NF
TdChr005.2207	17.62	1745.07	1610.83	2164.5	238.11	256.11	333.74	101.39	783.08	27.2	106.87	513.06	390.44	350.35	815.5	168.18	603.42	267.2	439.58	3.79	2077.43	0	2994.82	3.99563	Yes	Lysosomal (Digestion-Other)	GILT
TdChr002.025	0	0	17.46	561.74	1677.86	234.87	30.8	0.71	37.66	1.32	0.37	3.16	1.14	1.69	5.31	1.52	21.22	1.83	13.03	0.78	5.33	0	2769.74	110.007	Yes	Other or none function	NF
TdChr006.200	666.73	1025.14	9455.55	6060.56	4406.46	2224.04	4223.28	5664.49	1102.91	4998.58	667.1	1188.78	1221.26	2057.75	1717.33	1000.33	1093.05	972.56	719.76	8733.75	2146.76	302.17	2740.87	0.309984	Yes	Ribosom	Ribosomal_L14e
TdChr005.2000	10.5	72.74	36.08	42.55	31.26	34.86	49.85	35.97	120.53	24.92	82.21	69.33	118.12	69.45	157.13	89.61	64.74	134.82	68.75	40.27	207.25	1.56	2601.89	37.2864	Yes	Dehydrogenase (Digestion-Other)	adh_short
TdChr003.376	916.74	1406.71	4514.82	3028.2	2198.31	2265.32	1826.65	2276.86	511.15	3750.1	759.9	1177.14	1341.65	2071.44	1507.67	960.18	1071.65	979.74	782.11	3116.93	1745.92	49.99	2577.91	0.82256	Yes	Ribosom	Ribosomal_L24e
TdChr002.561	1730.1	2727.23	4075.69	2517.14	2047.58	1645.89	2151.26	2669.19	520.1	3510.93	654.68	944.32	1187.21	1715.7	1382.01	813.11	907.44	875.4	680.67	2634.94	2196.6	3.99	2577.46	0.520453	Yes	Ribosom	Ribosomal_L27A
TdChr001.578	563.14	434.77	1732.48	4598.38	989.31	225.61	456.12	468.76	284.63	388.83	218.79	287.72	228.64	270.08	231.1	209.13	216.38	150.56	235.54	376.98	162.05	5.56	2548	9.41778	Yes	Other or none function	Thioredoxin,Thioredoxin_6
TdChr005.330	1697.24	2260.04	5367.35	3445.55	2948.6	2042.81	2445.79	2692.28	736.5	3639.14	822.67	1209.91	1373.54	1901.07	1447.04	1080.48	1074.85	1026.96	746.15	3426.63	2194.8	15.91	2529.18	0.409747	Yes	Ribosom	Ribosomal_L30,Ribosomal_L30_N
TdChr001.223	11.55	1154.11	31.05	2.49	0.35	0	0	0	0.13	0	0.08	0.68	0	0.24	0.1	0	0.13	0.12	1.01	0	0	0.08	2513.17	2659.42	Yes	phosphodiesterase (Digestion-Other)	PI-PLC-X
TdChr005.1788	2390.37	5036.27	4735.77	2435.64	1420.43	1254.14	1644.83	1626.86	276.54	1923.49	328.67	398.53	638.35	806.99	665.76	327.27	391.86	385.65	301.69	2796.67	778.59	824.89	2495.09	0.948046	Yes	Ribosom	Ribosomal_60s
TdChr005.066	1420.78	2377.04	5271.05	3542.45	1580.45	1639.84	2267.19	2888.81	482.43	3485.64	579.23	711.51	899.55	1453.24	1041.14	702.66	625.41	582.47	427.48	4373.17	1556.16	69.54	2452.44	0.570766	Yes	Ribosom	Ribosom_S12_S23
TdChr001.128	0	16.64	15.68	93.43	0	0	0	0	0	0	0	0	0	0	0	0	0	0	0	0	0	0	2365.8	23659	Yes	Other or none function	NF
TdChr005.2023	325.97	782.16	4660.68	2955.55	2438.08	2331.2	2207.92	2503.86	582.33	3821.6	712.32	949.79	1215.34	1898.36	1313.23	920.51	856.78	910.45	628.11	4654.82	1896.52	234.38	2266.03	0.608777	Yes	Ribosom	Ribosomal_S19
TdChr002.2642	1660.33	2728.2	4128.55	2426.37	1460.37	1428.33	1572.03	1514.03	222.99	2244.1	305.54	428.45	576.48	897.91	587.48	363.36	350.26	403.14	285.78	3156.3	725.39	1414.6	2248.21	0.542596	Yes	Ribosom	Ribosomal_60s
TdChr005.637	1923.72	1834.67	2909.88	1940.95	1900.8	1800.4	1656.57	1808.99	460.32	2856.7	863.42	1225.79	1298.91	1524.15	1728.9	1077.95	1084.99	956.47	781.32	1345.97	1919.09	3.92	2214.29	0.673228	Yes	Ribosom	Ribosomal_S8e
TdChr005.2148	6.33	413.35	18.89	0	0	0	0	0	0	0	0	0	0	0	0.31	0	0	0	0	0	0	0	2180.08	21801.8	Yes	Other or none function	NF
TdChr002.1997	28.29	175.08	8.47	253.66	1.37	2.41	7.07	8.48	0.09	9.16	0.06	0.12	0.9	3.05	0.47	0.03	0.24	0.3	0.37	7.36	0.1	0	2159.62	257.099	Yes	Other or none function	NF
TdChr002.2256	1673.71	2242.79	4251.04	3078.35	2534.46	1815.46	2506.29	2742.94	566.41	3203.41	665.13	985.65	1151.65	1619.34	1243.16	921.04	920.28	899.09	659.63	2977.09	1745.96	12.86	2134.3	0.287965	Yes	Ribosom	Ribosomal_L23,Ribosomal_L23eN
TdChr001.3259	847.91	1437.78	5630.59	3707.94	2936.25	1950.09	2592.1	2828.82	603.18	3793.26	641.12	1059.59	1007.6	1595.31	1293.01	872.64	977.09	807	607.45	5053	1659.99	84.13	2130.75	0.374575	Yes	Ribosom	Ribosomal_S17,Ribosomal_S17_N
TdChr001.463	3.5	435.99	29.97	0.5	0	0	0	0	0	0	0	0	0	0	0	0	0	0	0	0	0	0	2112.54	21126.4	Yes	Other or none function	NF
TdChr006.155	10.06	18.14	4.8	1.5	1.44	0.54	2.79	3.93	0.53	6.72	0.42	0.7	3.87	1.73	0.25	0.13	1.95	1.37	0.47	5.17	5.17	0	2081.71	457.16	Yes	Other or none function	Catalase,Catalase-rel
TdChr005.196	339.13	517.78	2904.51	1892.33	1581.31	1235.58	1644.05	2090.34	388.86	2485.39	487.67	676.75	994.12	1241.28	1086.8	639.54	698	734.7	529.14	1530.28	1304.08	35.22	2042.45	0.92932	Yes	Ribosom	Ribosomal_L2,Ribosomal_L2_C
TdChr006.1519	13.52	799.08	20.4	6.2	269.34	0	0	0	0.59	0	0	0	0	0	0.45	0	0	0	0.53	0	0	0	2028.78	580.509	Yes	Other or none function	NF
TdChr003.737	2342.22	3435.24	4788.77	3260.37	2397.95	1469.89	2209.18	2878.01	457.41	3358.45	515.31	682.56	936.74	1507.47	1060.08	622.62	617.78	618.18	491.38	3620.33	1781.58	314.61	2016.21	0.252191	Yes	Ribosom	Ribosomal_S3Ae
TdChr004.383	630.15	1177.38	5392.37	3564.5	3354.63	1889.48	2878.28	3518.77	1014.96	3885.41	1019.8	1549.18	1508.84	2020.93	1923.42	1371.18	1453.81	1209.31	876.39	5286.6	2711.36	8.87	1965.38	0.0395173	Yes	Ribosom	Ribosomal_L5,Ribosomal_L5_C
TdChr006.628	888.08	1881.15	3463.82	2283.47	1449.51	1083.86	1455.21	1735.82	282.76	2053.65	298.96	442.65	588.51	972.02	575.27	388.06	377.82	420.16	296.07	2651.81	924.69	49.34	1961.23	0.738098	Yes	Ribosom	Ribosomal_L19e
TdChr005.524	1917.02	2705.78	4161.52	2839.1	1786.42	1374.52	1874.9	2266.66	476.3	2857.22	703.18	932.47	1162.46	1545.83	1260.46	982.65	841.72	882.01	620.37	4284.95	1853.35	634.92	1956.81	0.34126	Yes	Ribosom	Ribosomal_L6e,Ribosomal_L6e_N
TdChr001.2817	0.49	28.04	13.53	8.46	0.45	0	0.38	0	0	0	0	0	0	0	0	0	0	0	0	0	0	0	1941.12	3769.36	Yes	Serine_type_endopeptidases (Digestion-Trypsin)	CLIP,Trypsin
TdChr004.1350	214.08	449.12	3629.03	2336	1870.85	1731.31	1583.62	1893.1	487.7	2802.21	518.32	910.97	834.81	1299.92	1043.42	683.45	739.15	656.08	519.91	3685.79	1616.83	14.61	1934.98	0.68903	Yes	Ribosom	Ribosomal_L34e
TdChr006.397	0	1.12	4.82	3.63	0.3	0	0.45	0.11	0	0.25	0	0	0	0	0	0	0	0	0	0.09	0	0	1924.98	5133.55	Yes	Chitinases (Digestion-Other)	CBM_14,Glyco_hydro_18,LysM,Self-incomp_S1
TdChr001.2468	1.26	32.67	6	0	0.25	0	0.18	0.18	1.43	0	0.47	4.48	3.6	64.02	1.38	0.24	4.06	1.31	22.08	0	0.39	0	1852.55	441.859	Yes	Other or none function	NF
TdChr004.658	1695.98	2597.73	4790.32	2844.92	2541.54	1528.02	2360.5	2883.71	686.63	2625.14	643.17	890.52	1082.61	1347.17	1318.39	761.59	767.03	790.15	649.13	2942.17	1972.66	44.94	1832.22	0.169891	Yes	Ribosom	Ribosomal_L18_c,Ribosomal_L5e
TdChr001.2807	0.91	99.76	10.06	0.34	0	0	0.06	0	0	0	0	0	0	0	0	0	0	0	0	0.07	0	0	1829.01	11085.5	Yes	Serine_type_endopeptidases (Digestion-Trypsin)	CLIP,Trypsin
TdChr006.109	0.62	169.32	9.76	63.76	7.66	0.75	520.99	235.41	1473.17	14.28	146.07	415.89	333.17	272.13	454.96	223.66	585.11	432.44	650.39	3.59	600.42	0.36	1809.63	3.30701	Yes	Other or none function	NF
TdChr001.746	3217.71	3940.82	4000.43	2631.86	1745.76	1191.64	2019.58	2486.97	382.07	2591.73	408.52	533.11	758.34	1175.33	804.82	508.45	485.21	498.95	388.78	3043.26	1085.54	190.88	1806.78	0.31023	Yes	Ribosom	Ribos_L4_asso_C,Ribosomal_L4
TdChr001.3177	486.59	928.26	4710.14	2990.49	2330.69	1271.07	2080.12	2610.39	501.63	2972.11	439.18	618.09	695.51	1238.35	787.9	489.04	539.01	494.57	383.42	3012.23	1364.39	116.41	1797.44	0.509123	Yes	Ribosom	Ribosomal_L35Ae
TdChr003.152	93.56	178.8	2765.52	1792.17	1426.22	646.98	1338.53	1885.59	420.72	1643.53	221.91	487.85	449.57	742.24	552.99	365.34	415.48	337.05	277.38	1533.97	1570.74	1.25	1770.56	1.01366	Yes	Ribosom	Ribosomal_S28e
TdChr002.2217	1487.22	1518.98	4152.15	2979.66	2308.29	1343.86	1903.9	2212.84	717.2	1996.01	765.62	1337.86	1290.72	1402.53	1915.41	1154.44	1228.2	1178.3	921.9	1958.28	2692.52	4.33	1765.88	0.360157	Yes	Ribosom	Ribosomal_S30,ubiquitin
TdChr006.390	1.99	134.96	14.37	1.01	0.08	0.14	0.05	0.06	0.4	0	0	0	0.66	0	0	0	0.12	1.44	0.1	0.07	0	0	1754.18	1876.15	Yes	Serine_type_endopeptidases (Digestion-Trypsin)	Trypsin
TdChr004.845	2660.08	4298.62	3456.44	2419.41	1561.1	1060.62	1555.65	1485.32	367.39	1802.92	304.75	480.17	508.09	707.23	487.78	315.97	403.13	309.53	276.5	2743.39	1055.32	2596.8	1738.92	0.406321	Yes	Ribosom	KOW,Ribosomal_L27e
TdChr003.701	972.64	2333.55	5200.65	3046.74	2365.06	1423.15	1999.17	2259.83	490.9	2672.56	633.2	882.27	1056.91	1345.53	1262.79	792.99	848.87	761.05	580.85	2964.76	1715.09	101.81	1731.06	0.261292	Yes	Ribosom	40S_S4_C,KOW,RS4NT,Ribosomal_S4e,S4
TdChr006.396	1.31	42.37	32.66	1178.96	182.23	16.05	14.77	3.52	15.59	0.64	2.65	3.81	3.76	29.85	28.61	0.04	2.36	0.44	37.52	0.36	0.34	0.04	1721.96	56.5586	Yes	Chitinases (Digestion-Other)	CBM_14,Glyco_hydro_18,LysM,Self-incomp_S1
TdChr005.1163	102.98	387.13	4400.23	2608.22	2094.77	2008.33	1465.9	2063.09	432.35	2859.01	610.86	871.23	1057.66	1607.85	1380.01	577.04	961.01	833.95	542.6	2847.6	1753.09	0	1718.72	0.234981	Yes	Ribosom	Ribosomal_L29e
TdChr002.745	227.2	574.5	3762.74	2225.63	1850.11	1907.64	1382.56	1590.08	449.34	3226.62	938.58	1369.62	1427.96	2027.39	2031.97	1235.43	1234.73	1196.96	901.55	2598.4	2281.47	2.67	1709.32	0.292575	Yes	Ribosom	Ribosomal_L31e
TdChr001.1193	726.95	2148.21	1998.74	2323.35	126.98	68.68	24.7	14.34	79.35	9.5	428.06	2.09	5.03	10.59	544.78	24.45	2.04	9.94	7.07	2.65	2.64	0	1644.49	3.37199	Yes	Other or none function	DUF3421
TdChr005.787	812.77	1510.72	3777.95	2266.55	1774.03	1509.11	1522.94	1544.29	463.94	2120.53	472.96	787.91	951.57	1102.72	1129.83	678.3	770.99	683.18	520.73	2706.21	1522.19	404.79	1641.81	0.591272	Yes	Ribosom	Ribosomal_L36e
TdChr002.2943	0.93	157.04	34.06	0.1	0	0	0.07	0.04	0	0	0	0.05	0	0	0	0	0	0	0	0	0	0	1623.45	10147.2	Yes	Metallopeptidases (Digestion-Other)	NF
TdChr001.659	632.35	1251.85	3858.63	2606.18	2234.79	1429.43	1725.82	1935.99	487.44	2220.83	576.51	897.38	964.51	1295.52	1157.34	703.93	718.14	656.03	528.9	3276.27	1686.8	808.5	1613.31	0.32283	Yes	Ribosom	Ribosomal_S7e
TdChr005.1257	1065.42	1768.58	5418.54	3255.62	2873.21	1516.61	2176.83	2325.88	612.41	2737.72	620.39	941.56	1049.93	1462.59	1311.13	777.69	755.09	771.58	560.06	3469.74	2284.81	26.43	1606.95	0.0943683	Yes	Ribosom	Ribosomal_S24e
TdChr003.1733	1.89	36.08	9.89	12.28	0	0	0	1.17	1.21	0	0	0	2.45	2.63	0	0	7.22	4.21	4.16	0	0	5.66	1603.9	318.33	Yes	Other or none function	NF
TdChr003.2388	972.04	1719.77	3851.52	2570.14	2012.06	1174.4	1964.47	2424.05	493.59	2480.46	461.01	660.3	828.67	1163.12	1101.53	610.79	586.07	628.75	457.15	2489.25	1307.78	97.19	1598.22	0.31799	Yes	Ribosom	Ribosomal_L13
TdChr002.1230	1214.7	1682.13	3656.98	1994.37	1610.37	1830.75	1500.15	1819.35	472.16	3074.65	616.57	933.52	1012.02	1684.22	1272.62	760.08	863.26	748.13	574.01	3125.16	1614.77	613.57	1558.17	0.0618156	Yes	Ribosom	Ribosomal_S11
TdChr002.951	2471.98	1531.74	2955.34	1773.08	2199.52	1783.94	1951.71	2336.66	586	3494.47	688.19	1214.09	1493.06	1824.59	1612.8	1006.86	1232.88	1181	823	1289.84	1521.07	16.06	1553.52	0.0316778	Yes	Ribosom	Ribosomal_S5,Ribosomal_S5_C
TdChr006.679	1491.33	2391.88	3141.98	1990.31	1827.02	1277.02	1622.32	1993.91	544.34	2750.06	622	848.03	975.73	1384.88	1193.98	834.8	805.14	815.69	573.47	2420.23	1675.29	25.51	1550.19	0.15266	Yes	Ribosom	Ribosomal_S7
TdChr003.2349	0.57	86.27	6.47	0	0	0.06	0.02	0	0	0	0	0	0.05	0	0	0	0	0	0	0.06	0	0.03	1549.44	9997.03	Yes	Other or none function	NF
TdChr004.1823	183.33	273.86	678.93	1041.42	150.43	35.07	125.77	121.89	92.21	182.91	3.76	128.9	27.97	101.63	58.91	2.17	192.39	22.53	136.18	92.92	11.11	0.05	1532.16	9.2971	Yes	Other or none function	AIRC,Myb_DNA-bind_4,SAICAR_synt
TdChr005.2214	1152.29	1666.6	3353.68	2287.54	1739.94	1203.65	1513.23	1707.64	487.12	1857.26	489.81	768.86	811	1056.55	1152.1	694.21	759.58	642.92	514.05	2631.73	1611.64	202.62	1518.81	0.381767	Yes	Ribosom	Ribosomal_L13e
TdChr002.2310	11.68	580.5	21.78	0.61	0	2.83	11.99	15.01	0	9.72	0.1	0.11	1.03	2.4	0.06	0	0	0	0	8.29	0	0	1485.91	137.537	Yes	Other or none function	NF
TdChr002.3111	1585.27	2518.08	2414.97	1419.37	1121.52	1086.14	1135.97	1390.53	227.83	2722.01	408.42	631.87	764.52	1300.51	931.27	548.71	494.12	499.01	355.89	1889.05	1245.74	172.03	1484.2	0.390916	Yes	Ribosom	Ribosomal_L18
TdChr006.2052	57.18	121.23	35.6	54.29	64.66	48.41	61.64	42.78	144.1	39.8	37.11	39.57	31.28	34.13	310.14	51.46	55.42	33.47	25.07	43.7	94.79	21.09	1459.43	52.4677	Yes	Other or none function	GGACT
TdChr005.1920	0	34.26	7.38	0	0	0	0	0.31	0	0	0	0	0	0	0	0	0	0	0	0	0	0	1452.2	14523	Yes	Other or none function	NF
TdChr001.3216	1839.08	744.17	2876.49	2249.94	1900.99	1018.33	2517.46	3795.65	681.89	3611.24	708.23	1253.08	1279.44	2187.83	1537.01	879.12	936.26	867.29	1463.21	2120.37	1369.92	3.17	1438.98	8.0224e-05	Yes	Other or none function	EFG_C,EFG_II,EFG_IV,GTP_EFTU,GTP_EFTU_D2
TdChr001.3219	1094.06	1490.64	4249.5	2736.58	2000.55	1019.73	1890.89	2448.53	348.01	2480.55	359.25	530.15	636.75	991.17	830.01	440.4	501.1	449.92	364.56	2267.29	976.76	11.04	1430.3	0.298733	Yes	Ribosom	Ribosomal_L3
TdChr004.2061	3709.03	5701.56	3343.44	1900.18	1331.49	1181.97	1290.02	1487.5	332.45	2256.77	484.05	693.22	819.04	1130.62	944.88	529.65	566.72	558.67	418.17	1994.72	930.54	1779.57	1427.63	0.203107	Yes	Ribosom	Ribosomal_L16
TdChr003.2412	2.2	317.94	9.87	0	0	0	0.11	0	0	0.21	0.15	0	0	0	0.18	0.15	0.23	0	0	0	0	0.14	1416.93	4803.49	Yes	Other or none function	NF
TdChr004.1535	805.33	1531.84	2873.3	1797.77	1414.29	1289.73	1324.18	1273.25	337.79	1954.37	437.02	663.18	803.95	1157.02	734.21	536.13	601.66	612.04	453.27	2729.57	1763.24	8.16	1416.24	0.299	Yes	Ribosom	Ribosomal_L22e
TdChr005.152	6.8	637.97	140.39	10.15	0.14	0	0.1	0	0	0	0	0	0	0	0	0	0	0	0	0	0	0	1404.92	6386.45	Yes	Other or none function	NF
TdChr001.2350	570.45	1324.2	3298.13	1781.71	1439.56	1299.24	1081.64	1013.52	290.97	2082.94	529.13	828.14	810.6	1115.67	1001.77	721.74	790.01	663.33	536.45	2484.87	1454.27	344.75	1404.58	0.536104	Yes	Ribosom	Ribosomal_S17e
TdChr002.2808	343.64	369.25	2215.81	5549.8	1348.98	458.88	730.88	407.82	656.16	281.54	892.22	833.82	203.8	197.92	407.21	446.21	1456.62	179.44	202.91	358.34	265.6	0	1397.85	1.67947	Yes	Other or none function	Lipocalin
TdChr003.244	1.24	32.57	11.95	40.64	34.24	43.81	180.63	202.57	1447.02	56.99	29.73	1621.83	169	511.68	2695.8	33.93	2260.29	118.7	605.89	5.85	258.89	0.06	1379.13	2.39811	Yes	Other or none function	ADH_N,ADH_zinc_N,Glu_dehyd_C
TdChr004.042	1362.57	2121.51	3325.48	2017.99	1501.81	1171.13	1467.71	1727.41	454.56	2241.5	529.29	744.38	856.47	1139.64	968.85	664.87	697.98	695.21	423.22	2589.84	1437.48	2863.35	1346.91	8.68342e-05	Yes	Ribosom	Ribosomal_S8
TdChr003.2187	2448.13	3910.07	3827.95	2225.82	1606.78	1125.73	1567.61	1928.37	327.19	2202.55	314.31	421.12	547.99	865.39	634.66	427.62	400.66	413.48	292.08	2797.97	871.11	17.03	1341.55	0.285477	Yes	Ribosom	Ribosomal_L18A
TdChr001.2358	969.15	2104.84	3594.81	2327.02	1864.41	997.59	1631.26	1912.91	506.7	2118.44	536.89	783.6	875.66	1154.78	1092.5	711.93	760.75	675.6	528.88	2186.98	1693.07	321.72	1318.29	0.196014			Ribosomal_S6e
TdChr005.202	1719.88	2694.91	4252.46	2603.48	2347.94	1133.93	1794.68	2118.83	541.32	2011.59	402.62	633.07	671.08	957.65	958.82	571.06	553.43	587.92	420.95	2261.39	1272.09	1723.57	1305.7	0.0231713			Ribosomal_S27,ubiquitin
TdChr004.600	658.24	1148.09	3668.54	2333.92	1773.98	747.56	1589.62	1908.3	447.72	1624.45	315.56	437.43	494.74	731.21	590.19	387.61	376.13	387.95	312.77	2572.57	999.62	807.94	1297.53	0.472341			Ribosomal_S13_N,Ribosomal_S15
TdChr002.3137	169.02	198.92	38.86	1453.09	510.7	0	0	0	0	0	0	0	0	0	0	0	0	0	0	0	0	0	1290.38	66.0768			NF
TdChr002.827	5.74	20.57	59.8	249.23	13.22	73.1	217.84	159.54	709.94	58.64	334.49	433.64	573.07	168.72	470.21	391.77	430.84	614.05	175.18	74.5	680.65	4.9	1284.9	2.76771			GST_C_3,GST_N
TdChr003.2411	712.85	792	19.69	2.95	0.29	1.55	0.2	0.94	0.21	0.76	1.07	3.13	1.24	1.01	6.95	4.01	3.43	5.71	0	0.41	0	0	1283.14	278.091			NF
TdChr006.495	0.07	2.85	3.5	0.28	0	0	0.05	0.03	0.03	0.05	0	0	0	0	0	0	0	0	0	0	0	0	1279.28	8529.2			NF
TdChr003.1523	520.53	378	2368.38	1887.29	2156.21	1326.11	819.64	775.27	997.25	697.41	2702.07	1140.32	277.51	523.62	982.66	443.95	1411.89	313.83	400.54	752.4	352.11	743.4	1278.16	0.613406			Pro_isomerase
TdChr004.2162	21.56	139.43	89.24	97.21	93.72	42.85	43.55	54.48	48.33	67.75	25.9	44.45	28.85	39.9	53.79	27.3	48.21	24.97	27.27	66.14	37.94	0.27	1276.64	31.6215			Aminotran_1_2
TdChr004.214	386.98	1084.06	4019.37	2611.69	2502.3	1418.68	1856.65	2177.47	585.92	2049.65	437.9	780.46	837.81	1118.13	927.66	619.27	616.76	641.23	482.48	2727.34	1975.01	17.37	1274.2	0.13643			Ribosomal_L7Ae
TdChr001.1087	255.54	814.38	2379.34	1526.39	1406.48	1269.99	1089.6	1288.31	400.51	2005.96	545.42	857.19	892.26	1203.43	1143.37	741.07	763.97	737.59	506.05	1842.79	1641.52	13.34	1270.3	0.297288			Ribosomal_L28e
TdChr005.649	240.45	845.62	2701.68	1695.48	1350.49	998.71	1162.03	1329.07	276.21	1955.84	336.05	489.59	538.99	869.16	676.73	462.48	452.67	405.35	304.14	1765.93	1053.55	5.72	1270.2	0.487731			Ribosomal_L29
TdChr006.641	238.61	420.98	2442.65	1552.03	1081.76	870.5	1208.84	1580.22	260.74	2367.41	334.12	517.1	576.3	1027.12	740.79	454.06	457.41	468.99	375.09	2647.14	974.9	92.72	1230.16	0.625857			Ribosomal_L7Ae
TdChr003.728	422.19	1120.78	3578.82	2002.06	1529.13	1129.87	1377.64	1654.28	352.09	1926.15	375.96	495.37	637.84	901.11	606.6	431.09	449.79	450.28	267.52	2144.16	1081.11	55.04	1229.44	0.324201			Ribosomal_L32e
TdChr006.1437	1.32	83.26	6.11	2.5	0.32	0	0.29	0	0.46	0.14	0	0.62	0	1.17	1.42	0	0.47	0	0.14	0	0.34	0	1228.63	913.316			NF
TdChr002.884	1057.81	2108.07	4077.51	2457.87	1598.42	929.13	1900.87	2177.18	403.86	2134.59	335.96	526.07	585.48	988.17	625.83	401.32	498.37	450.95	320.99	4227.6	1274.32	2749.33	1198.65	0.0875833			KOW,Ribosomal_L26
TdChr003.386	1161.67	2164.6	3155.7	1887.51	1499.49	1093.1	1250.9	1513.25	429.52	2081.53	514.76	812.17	913.19	1094.52	1118.62	666.85	784.66	708.33	532.22	2001.07	1549.2	744.9	1189.22	0.092232			KH_2,Ribosomal_S3_C
TdChr003.1762	0	72.1	0	45.35	0	0	0	0	0	0	0	0	0	0	0	0	0	0	0	0	0	0	1188.47	11885.7			NF
TdChr001.1186	15.36	111.27	8.94	69.95	4.37	4.22	13.99	9.42	17.95	9.64	1.4	112.27	21.86	46.98	26.98	2.33	81.79	13.24	67.98	6.68	7.84	0	1186.51	23.3033			Trypsin
TdChr002.2417	657.24	1196.63	2762.54	1626.16	1201.28	1004.46	1086.72	1254.81	298.23	1760.11	478.68	662.73	814.23	1048.79	1099.49	671.33	657.01	607.01	423.09	1627.06	1131.87	9.7	1184.78	0.251121			Ribosomal_L21e
TdChr002.1022	664.76	909.11	1943.75	1468.11	1159.08	1156.36	966.28	1136.73	337.61	2070.92	594.34	825.66	906.2	1136.5	1155.37	799.59	712.09	682.02	511.19	1832.74	1209.42	18.86	1183.51	0.458173			Ribosomal_L22
TdChr006.1850	3220.1	4131.14	2943.99	1753.1	1246.08	932.03	1427.67	1498.67	243.84	1715.55	259.42	402.29	661.4	838.17	682.03	349.34	391.06	450.71	334.34	1512.15	950.03	509.65	1182.15	0.231898			Ribosomal_60s,Ribosomal_L10
TdChr006.1059	1537.28	1395.08	1425.09	1418.38	1551	1786.79	3822.65	5143.32	1426.29	4738.79	722.51	1464.38	3317.23	2927.8	1315.35	952.63	1552.17	2618.81	2250.35	2849.62	2651.3	12.19	1177.45	-0.2779			PABP,RRM_1
TdChr002.993	0	5.04	44.7	373.95	1025.42	222.36	3275.66	2448.17	14132.4	709.52	25.42	13.85	126.75	140.6	23047.8	8.66	16.19	98.69	121.36	96.7	2926.52	0	1167.09	0.967356			p450
TdChr005.1304	1006.25	1857.49	3288.07	1757.39	1384.31	888.97	1286.01	1541.38	337.15	1861.52	302.93	463.22	527.81	844.96	561.23	395.73	474.65	394.84	269.4	2251	938.77	17.02	1165.69	0.267855			Ribosomal_L40e,ubiquitin
TdChr006.203	44.09	309.14	1278.97	1329.96	429.8	151.68	458.51	223.14	1304.33	45.11	749.78	1416.6	407.23	473.19	305.12	622.15	931.5	267.85	686.14	40.84	170.13	0.05	1165.03	1.14163			Gln-synt_C,Gln-synt_N
TdChr001.230	497.71	594.56	2343.09	1716.76	1336.23	867.56	1312.56	1755.61	336.68	1905.9	352.41	490.45	619.97	911.18	697.23	449.59	422.84	456.38	336.44	1734.62	994.65	2.37	1151.38	0.521222			Ribosomal_L7Ae
TdChr005.554	24.96	1444.26	38.97	0.33	0.68	0	0.27	0.21	0.5	0.13	0.09	0.19	0.14	0	0	0.09	0.43	0.39	0.38	0.26	1.73	0	1112.52	1917.84			NF
TdChr006.907	685.6	1278.57	2534.81	1476.47	1334.2	977.12	917.3	1149.36	279.72	1458.32	274.66	393.82	501.79	651.55	712.56	387.08	443.68	369.43	301.7	1237.4	743.21	24.13	1102.24	0.485387			S10_plectin
TdChr003.2048	4.43	387.89	6.01	0.84	0.12	0	0.15	0.05	0	0.08	0	0	0	0	0.04	0	0	0.12	0	0.03	0	0	1095.2	4660.72			Hemocyanin_C,Hemocyanin_M,Hemocyanin_N
TdChr003.785	2164.68	2780.8	6359.46	6295.57	2235.05	1198.29	1627.66	1534.87	81.56	1554.37	40.66	55.49	187.8	438.86	27.4	60.19	78.63	74.83	32.42	1719.31	49.87	5.44	1093.6	0.405287			Crystallin,HSP20
TdChr001.2687	210.29	492.55	2458.47	1337.06	1070.16	994.36	1017.69	1149.81	222.5	1893.39	391.25	591.1	706.25	931.38	819.41	488.45	529.76	494.05	421.08	2046.06	1444.92	6.83	1081.33	0.419118			Ribosomal_S9
TdChr006.388	2.49	142.54	7.58	31.1	3.3	0.84	2.24	0.35	0.71	0	0.15	0.47	0.68	0.22	0.63	0.46	0.84	0.85	1.25	0.29	1.96	0.07	1080.59	524.199			Trypsin
TdChr006.1067	66.02	6547.97	176.18	198.46	28.9	55.67	51.13	55.12	189.67	73.22	2.25	0.55	1.2	46.56	1925.7	7.4	0.25	1.35	0.88	10.46	43.75	0	1051.65	8.17228			Peptidase_M14,Propep_M14
TdChr004.1747	42.6	233.72	2465.81	1283.77	959.53	1206.38	1003.48	1083.26	268.88	2071.96	368.46	514.93	592.93	921.03	879.34	503.78	542.13	416.19	335.63	2495.15	1048.16	36.58	1045.06	0.246212			Ribosomal_S21e
TdChr003.611	25.71	100.5	18.35	79.26	32.64	7.25	45.6	72.01	5.49	90.09	3.06	1.05	6.03	32.82	6.37	4.14	1.26	4.24	1.39	96.02	1.01	0.3	1044.14	18.7504			Asn_synthase,GATase_7
TdChr002.3410	553.71	1308.24	432.14	697.69	554.05	1031.04	738.89	397.47	205.38	388.06	744.32	34.25	147.76	139.3	335.96	1188.04	29.56	152.02	29.35	348.61	289.67	0	1039.16	1.14547			GST_C,GST_C_2,GST_C_3,GST_N,GST_N_3
TdChr001.130	3.61	167.38	62.18	260.59	0.61	0.53	4.24	2.03	0.68	2.21	0.23	0.12	0.17	0.76	0.35	0	0.09	0.16	0.32	2.76	0.2	1.11	1038.86	338.202			Ldl_recept_a,Sushi,Trypsin
TdChr004.488	1613.69	544.58	1989.52	2945.41	1197.08	646.17	1841.26	2682.3	490.39	2484.25	371.41	337.63	467.21	1010.14	637.48	655	412.34	462.26	305.02	2597.48	262.85	1220.27	1038.56	0.303807			Calreticulin
TdChr006.700	64.31	188.33	88.09	109.36	119.35	139.71	326.69	188.34	672.39	164.08	184.3	407.73	252.4	227.78	321.58	216.72	374.14	220.24	267.42	73.3	227.69	0.27	1038.07	4.97637			Aminotran_1_2
TdChr003.786	943.08	3914.62	3501.96	3764.5	938.08	729.86	578.06	715.23	65.46	630.39	44.62	48.16	90.79	228.2	29.96	24.68	78.92	41.02	56.83	930.12	51.08	1.25	1015.53	0.890174			Crystallin,HSP20
TdChr006.1636	1.16	9.49	6.49	1	0.16	0.18	0.15	0.08	0	0	0	0	0	0	0	0	0	0	0.54	0	0	0	1010.27	2196.46			NF
TdChr002.3605	405.2	738.34	2808.9	1612.4	953.68	668.9	839.72	867.83	181.23	971.25	201.4	308.4	365.6	466.96	454.36	232.05	278.7	269.27	217.98	1188.69	733.33	65.66	1004.9	0.844819			Ribosomal_S4,S4
TdChr005.694	522.75	1050.23	2622.53	1432.64	835.52	693.28	983.7	1207.06	182.15	1713.87	259.88	403.48	465.44	800.83	551.53	325.76	340.52	313.68	226.36	1910.26	720.45	633.33	992.14	0.460445			Ribosomal_L1
TdChr001.2395	0.44	62.74	10.92	2.89	0.24	0.14	37.2	0.09	1.66	0	4.25	0.15	0.17	0.16	0.09	0.23	0.53	0.94	2.75	0	0	0.03	985.79	351.39			NF
TdChr001.764	9.62	64.6	205.52	571.09	339.45	199.36	239.69	83.77	477.95	8.18	28.68	446.15	86.03	213.04	158.69	34.86	505.77	55.13	215.44	1.57	51.52	0	974.02	3.3083			PEPCK_C,PEPCK_N
TdChr006.208	0.34	25.16	30.27	74.72	10.71	1.73	0.83	0.23	0.94	0	0	0	0	0.06	0.15	0.04	0.14	0.06	0.06	0	0	0	969.11	675.31			CD36
TdChr004.1586	2151.07	621.36	1117.98	2290.23	848.47	348.29	974.01	1406.8	333.15	1231.63	320.03	218.43	377.53	521.32	409.89	486.02	313.53	345.15	247.86	631.29	69.22	50.68	967.15	0.747147			HSP70
TdChr001.2836	11.48	375	17.06	1.62	0	2.72	0.67	0.66	0	0.66	0	0	0	0	0	0	0	0	0	2.25	0	0	964.95	474.226			NF
TdChr006.220	900.91	860.14	1802.03	1105.05	1434.22	985.58	1008.93	1221.94	311.19	1634.91	385.08	541.83	718.37	841.24	776.97	462.48	487.57	556.73	396.55	883.01	868.18	71.58	958.73	0.204473			40S_SA_C,Ribosomal_S2
TdChr002.3548	4.32	431.52	3797	2661.55	8.37	231.45	31.33	15.79	181.97	39.96	0.05	3.01	0.81	25.98	2280.63	0.66	2.39	0.99	1.48	5.08	6.94	0.05	950.3	4.59807			Peptidase_M14,Propep_M14
TdChr004.2068	797.12	1016.49	2550.11	1485.37	1026.91	706.79	1060.25	1283.01	174.41	1559.38	210.81	317.28	408.95	677.76	551.59	297.36	338.13	265.03	234.41	1525.19	540.56	9.88	948.58	0.367918			WD40
TdChr005.1830	0.15	0.47	3.32	1.52	1.45	2.14	6.05	7.48	62.03	3.91	21.95	215.96	118.27	100.86	158.41	27.82	212.41	137.84	195.71	2.19	76.19	0.81	944.06	7.31971			COesterase
TdChr001.267	14.08	268.1	185.97	459.28	95.52	104.12	58.15	49.14	222.77	45.23	57.86	46.92	76.2	44.43	334.68	135.26	60.01	93.05	41.31	35.24	74.1	24.66	939.48	7.54955			Aldo_ket_red
TdChr003.1883	748.7	1016.23	2526.7	1383.44	984.12	596.82	872.92	1110.14	247.74	1180.58	290.3	419.95	395.49	518.04	545.92	296.94	346.32	351.12	220.96	906	700.53	0	933.09	0.55144			Ribosomal_S27e
TdChr002.510	5251.18	4194.3	2346.75	1875.01	1258.85	1867.27	3294.81	1476.42	610.24	1246.98	285.08	617.82	583.33	749.52	469.7	342.29	621.27	453.57	412.05	1128.36	1086.5	87.95	910.56	8.73035e-05			ATP-synt_C
TdChr002.2674	1143.98	1311.7	2209	1402.64	1043.3	790.48	1004.98	1260.52	188.12	1815.96	313.8	392.46	564.32	860.9	557.32	362.02	392	351.41	263.19	1589.56	713.68	14.68	906.45	0.140633			Ribosomal_L15e
TdChr002.2945	0	16.78	3.3	0.04	0	0	0	0	0	0	0	0	0	0	0.14	0	0	0	0	0	0	0	898.68	8987.8			NF
TdChr003.988	2565.88	612.67	1830.55	856.26	683.03	1251.11	6883.21	3949.82	3008.02	3990.21	978.06	2328.94	6107.31	20149.9	1023.96	833.62	1769.97	3081.71	29060.2	724.9	8376.53	0.15	889.74	-0.303738			Mito_carr
TdChr006.666	1228.18	1219.69	2561.77	1550.1	1263.22	1069.35	1347.88	1742.17	302.7	2170.52	224.78	356.84	453	867.06	469.29	298.28	306.9	346.64	229.29	2327.94	644.57	431.48	876.4	0.00989611			Ribosomal_S19e
TdChr001.2814	0	26.41	14.31	2.02	0	0.15	0.37	0	0	0.11	0	0	0	0	0	0	0.13	0	0	0	0	0	858.97	3579.46			CLIP,Trypsin
TdChr006.1393	26.24	105.01	197.01	108.79	104.47	62.1	23.49	18.57	30.89	22.13	12.81	35.01	32.4	21.34	24.18	11.97	21.58	20.13	19.64	18.02	27.76	0.37	853.73	28.8373			Glyco_hydro_20,Glycohydro_20b2
TdChr001.2498	242.54	102.64	230.95	184.63	83.63	125.03	325.83	564.34	56.26	869.36	21.77	60.88	67.86	295.17	49.32	11.71	30.83	19.26	26.24	196.8	19.08	0.53	831.78	3.592			S-AdoMet_synt_C,S-AdoMet_synt_M,S-AdoMet_synt_N
TdChr006.1856	1436.11	1011.05	1417.63	1575.33	658.41	330.67	614.27	742.31	243.91	723.47	125.21	174.03	209.47	322.79	438.45	268.64	251.05	241.54	210.43	726.14	182.62	0	825.18	0.972991			Sec61_beta
TdChr001.474	1213.79	442.72	1932.66	966.7	1138.86	442.96	1138.88	1668.8	241.88	1471.27	187.81	376.41	295.6	544.4	324.06	202.98	213.69	135.84	188.18	415.73	150.13	6.48	808.55	0.465245			zf-CCHC,zf-CCHC_4
TdChr001.2496	0	9.61	7.02	33.35	0.65	0	0	0	0	0	0	0	0	0	0	0	0	0	0	0.35	0	0	801.09	2913.42			NF
TdChr003.568	183.83	119.45	462.89	599.63	150.2	60.36	239.77	339.19	157.18	354.92	61.74	195.99	103.62	193.92	106.36	60.87	153.63	54.95	142.83	164.9	50.23	0.27	767.51	4.53792			Pribosyl_synth,Pribosyltran_N
TdChr004.1556	2.94	220.72	11.82	41.66	15.55	2.4	15.34	25.18	65.98	1.99	1.05	168.64	17.32	78.5	39.74	1.99	162.04	11.42	76.63	1.46	37.3	75.63	764.3	10.7056			Amidase_2
TdChr004.1822	45.75	29	204.03	238.37	196.33	46.24	190.67	189.65	172.24	240.69	3.12	75.24	34.86	125.8	72.12	2.16	102.55	10.18	38.42	77.1	10.57	0	753.71	4.2858			GATase_6,Pribosyltran
TdChr001.1166	0.41	61.58	16.06	92.71	164.11	105.23	56.11	45.56	273.32	12.14	679.85	60.2	144.68	39.54	880.82	208.16	133.51	59.66	87.46	2.84	133.33	0.04	735.46	5.78945			p450
TdChr005.1940	1.56	177.49	170.85	59.37	2.24	10.11	17.82	8.78	51.39	1.78	13.66	117.78	34.62	54.81	64.52	16.54	152.97	29.44	79.03	0.52	58.39	0.04	729.2	11.1273			CBM39,Glyco_hydro_16
TdChr001.3434	1.59	5.25	22.1	13.97	13.59	8.61	26.14	32.3	7.17	43.83	2.05	7.75	5.29	15.35	19.32	2.28	11.23	4.51	6.25	43.15	7.88	0.07	723.25	45.9936			THF_DHG_CYH,THF_DHG_CYH_C
TdChr005.2147	4.22	210.86	16.68	82.68	0.85	0.09	0.04	0	0.04	0.07	0	0.52	0.83	0.37	0.06	0.36	0.32	8.89	0.41	0.05	0.35	0.05	719.54	278.791			NF
TdChr003.2280	22.62	199.73	28.37	18.78	21.43	26.45	40.41	33.33	38.38	50.75	6.8	27.62	18.65	28.46	53.24	7.89	36.93	20.07	20.85	63.64	8.41	0.42	709.02	33.9562			Peptidase_C26
TdChr001.3067	1.49	81.51	6.19	1.45	53.64	0	0.17	0	0.27	0	0	0.08	0.06	1.88	0.41	0.04	0.06	0.05	6.56	0.07	0.6	0	704.95	405.103			NF
TdChr001.2925	3286.11	2101.53	2247.39	1316.16	1392.89	745.5	1222.36	1734.2	436.78	1953.84	354.4	668.36	578.85	1067.16	1071.87	559.96	767.19	565.66	516.77	1360.41	1145.54	370.02	702.21	-0.453514			TCTP
TdChr001.2910	1632.19	1829.93	2089.65	1220.23	700.84	573.33	1051.12	1430.68	178.36	1559.67	189.85	269.57	294.13	638.42	367.42	233.56	198.3	214.55	180.25	1075.91	264.78	373.74	684.5	0.123771			eIF-5a
TdChr001.2834	83.61	114.63	12.03	0.12	1.66	0	0.77	1.05	1.33	0.24	0.34	0	0.79	0.26	0.61	0.18	1.36	1.93	1.18	0.35	0.87	0	684.28	502.64			NF
TdChr005.230	597.05	394.51	656.32	732.22	237.46	142.13	205.19	336.21	44.1	466.81	69.67	64.02	75.8	146.9	77.24	68.24	79.52	59.7	37.93	525.65	58.82	673.09	666.23	1.2154			TRAP_beta
TdChr001.2349	179.08	308.37	1445.16	809.91	629.69	498.83	515.59	505.56	158.59	913.15	278.78	456.27	379.72	517.33	489.63	385.62	378.92	315.58	275	630.17	695.31	330.23	661.55	0.560098			Ribosomal_S17e
TdChr006.035	12.45	240.64	346.62	1002.11	154.03	10.01	56.7	2.32	30.85	2.03	0.57	96.48	5.85	20.57	120.94	1.69	249.56	16.9	141.4	0.45	18.33	0	655.96	4.42142			AICARFT_IMPCHas,MGS
TdChr006.214	218.79	231.92	320.25	557.61	179.32	50.79	66.36	97.3	19.07	137.06	13.44	35.88	32.81	62.04	35.4	15.43	52.65	22.43	26.3	109.42	24.43	0.36	641.39	4.42987			2-Hacid_dh,2-Hacid_dh_C
TdChr005.800	148.86	331.95	1629.48	942.88	587.55	388.54	654.7	814.89	80.47	914.59	120.98	188.25	238.18	399.26	285.54	136.57	159.76	140.84	128.04	949.12	360.17	3.18	640.7	0.614077			Ribosomal_L11,Ribosomal_L11_N
TdChr004.243	1.93	0	3397.99	5694.39	2.17	2.7	0	0.48	1.95	0	0	0	3.03	0	0	0	0	0	0	0	0	0	639.24	295.991			Chitin_bind_4
TdChr006.550	30	1723.87	887.22	756.48	385.93	138.37	131.71	27.09	131.06	21.69	45.99	221.52	86.42	68.38	214.28	66.34	372.71	98.75	150.97	11.64	91.47	6.3	632.53	2.08077			ECH_1
TdChr001.327	1.34	8.69	48.16	436.98	58.72	97.32	159.74	66.12	324.31	14.3	125.62	306.74	185.97	195.56	218.32	113.69	222.23	145.04	177.36	3.28	168.56	44.99	629.92	3.15742			adh_short
TdChr006.060	101.16	781.33	460.71	681.43	1858.05	468.33	533.49	240.74	1370.59	100.41	813.42	1090.59	1140.97	623.43	2354.17	1359.61	1248.48	1127.31	793.83	34.08	1055.52	4.78	626.69	-0.230753			Sod_Cu
TdChr001.2804	3.39	78.85	8.6	31.93	313.2	0.97	7.99	1.76	8.08	0.16	0.11	15.26	4.71	3.56	10.09	0.65	21.32	5.96	19.67	0.05	2.72	0.05	625.66	38.2593			CLIP,Trypsin
TdChr004.2278	137.08	179.37	337.65	447.82	605.48	324.61	567.87	463.82	946.1	359.22	427.75	238.06	341.63	225.69	1502.47	704.92	286.37	425.26	256.88	221.15	567.14	2.77	623.79	0.826745			Cyt-b5
TdChr006.338	3365.7	2384.01	1873.61	1087.5	394.71	324.58	741.31	1190.98	58.08	1659.78	95.15	122.06	192.09	617.77	126.05	105.86	111.19	87.16	63.75	1579	122.44	36.12	620.68	0.287345			EF1G,GST_C,GST_N
TdChr001.2447	10.4	923.55	882.72	974.32	440.87	60.84	64.54	21.16	126.94	0	0	56.78	14.89	76.57	129.86	3.87	110.5	16.79	209.95	0	8.69	0	619.86	3.48448			-
TdChr004.2333	963.7	564.09	1446.1	1125.09	1091.38	460.3	707.26	699.74	604.32	576.32	322.22	480.82	495.77	451.54	627.06	442.21	362.88	401.06	338.27	440.33	834.08	21.72	613.81	0.189913			DEAD,Helicase_C
TdChr005.1333	3.87	515.83	278.86	329.76	109.42	76.85	106.67	4.72	54.26	2.53	16.95	34.07	28.06	15.73	81.04	22.43	88.84	29.97	40.98	1.46	19.83	0.14	613.7	7.11194			NAD_binding_11,NAD_binding_2
TdChr005.1051	1322.55	1976.31	1057.21	1181.07	783.41	1034.86	2147.67	1034.01	2270.24	830.31	743.16	3415.77	2899.93	5878.08	1425.7	997.76	4025.89	3022.32	8959.33	529.96	3658.78	318.86	610.6	-0.347721			Gp_dh_C,Gp_dh_N
TdChr002.2321	1189.34	555.99	1121.24	760.27	580.78	1407.27	1860.77	818.11	325.68	968.48	167.01	360.15	273.66	448.85	263.93	164.39	336.57	202.37	195.42	221.81	203.15	0.22	607.72	0.429379			ATP-synt_ab,ATP-synt_ab_N
TdChr003.2193	661.93	1280.4	2172.95	1741.89	1256.62	1915.13	4212.35	1376.29	2980.31	982.64	469.88	1305.97	1369.86	2209.34	729.74	775.56	1755.72	1478.36	2461.28	1979.62	2944.83	219.5	605.43	-0.643756			UcrQ
TdChr004.681	0	0	2.4	0.42	0.53	0.16	23.97	4.07	351.3	0.11	602.49	1.04	3.14	4.53	7.17	5293.44	1.05	4.33	1.14	0	1.72	0	593.58	104.587			CRAL_TRIO
TdChr006.1036	3.5	291.47	4.84	15.35	1.1	0.06	3.23	0.75	2.95	0.09	1.04	3.79	6.14	2.53	0.89	0.43	0.92	3.18	1.38	0.03	3.17	0	590.48	201.043			NF
TdChr004.690	13.12	39.44	74.83	196.99	50.36	93.45	66.53	94.51	50.1	123.16	0.63	16.69	14.16	35.72	80.72	1.02	80.28	6.65	41.21	152.99	11.61	0	584.36	7.26576			PEMT
TdChr005.802	155.62	353.26	1431.41	856.69	505.47	389.16	533.06	591.88	109.93	721.25	135.88	218.56	225.98	349.95	332.4	192.98	182.15	179.16	124.12	783.07	408.42	2.95	583.92	0.619339			Ribosomal_L11,Ribosomal_L11_N
TdChr005.064	1.23	16	74.55	299.1	18.28	5.21	15.42	4.11	28.43	0.99	0.25	34.74	1.35	7.62	3.09	0.14	26.25	1.03	12.6	1.01	3.06	0.03	583	27.214			AMP-binding,AMP-binding_C
TdChr002.1377	388.51	469.09	804.8	789.6	564.41	1486.95	1867.24	803.21	1558.82	559.97	587.15	1259.18	2452.48	10158.2	769.9	717.34	1838.22	2128.88	14284.1	743.05	5309.41	191.35	578.63	-0.176764			B12D
TdChr001.273	809.41	1585.25	1207.79	745.18	649.74	548.65	483.7	569.75	181.52	830.83	254.43	443.03	439.44	516.62	571.91	409.07	445.63	389.11	290.83	558.29	864.1	309.29	575.84	0.0998518			Ribosomal_L6
TdChr004.583	123.98	140.83	154.62	108.54	259.62	278.49	318.76	298.49	448.23	174.61	119.25	1003.7	185.77	295.69	223.7	109.83	444	99.58	445.51	56.04	22.98	0	574.8	2.00391			Orn_Arg_deC_N,Orn_DAP_Arg_deC
TdChr002.2455	0.18	3.93	11.18	7.79	125.82	0.53	1.97	0.51	10.23	0	0.09	0	0.43	11.02	24.41	2.99	0.3	0.53	88.66	0	0	0	573.1	54.0765			GMC_oxred_C,GMC_oxred_N
TdChr006.1506	8.16	74.2	118.69	1034.68	473.33	58.47	43.34	6.38	13.51	6.34	6.36	38.98	9.98	11.38	12.42	17.48	4.04	12.11	2.19	2.89	29.92	0.29	572.6	12.5525			SGL
TdChr004.2085	223.2	484.43	1880.68	1065.88	991.22	598.2	675	699.94	275.04	821.49	217.55	384.94	353.76	504.57	487.23	362.51	376.65	313.9	242.94	1190.1	558.39	0.67	571.03	0.23718			Ribosom_S12_S23
TdChr002.3678	8.44	108.64	19.98	36.17	3.13	3.12	16.22	19.64	1.38	22.75	2.09	6.49	3.96	7.56	1.35	1.98	3.59	5.23	2.22	23.96	5.76	62.92	569.85	30.723			CBM_14
TdChr001.2430	0	2.39	0.35	0.04	0.13	0.22	0.66	0.46	1.94	0.08	0.12	7.48	0.27	0.26	0.07	0.18	5.81	0	0	0.06	0	0	568.11	931.197			NF
TdChr001.315	11.7	121.35	66.65	477.15	377.62	158.44	89.45	30.42	289.8	4.72	39.3	194.4	68.14	100.36	268.16	64.36	187.94	63.59	138.8	1.28	11.5	0	562.51	3.02513			PNP_UDP_1
TdChr005.1126	14.6	182.67	73.69	46.25	35.66	15.77	12.69	10.19	25.46	13.43	7.18	24.45	88.98	19.12	36.32	16.04	60.75	148.12	30.89	4.82	26.89	0.1	561.7	13.5491			Trypsin
TdChr001.1025	13.16	2.4	3.38	6.15	0	0	0	0	1.73	0	0	0	0	0	4.36	0	1.42	3.12	3.07	0	21.14	1.8	558.84	166.424			NF
TdChr006.1834	499.57	289.61	299.65	858.16	11.92	33.36	88.81	105.51	38.55	113.11	14.81	26.56	22.92	51.56	39.13	39.62	44.71	27.52	41.68	155.88	8.45	1018.71	556.29	2.65939			-
TdChr003.2045	3.51	241.01	3.69	0	0.03	0	0.07	0.1	0.02	0.04	0	0	0	0	0	0	0	0	0	0.11	0	0	551.57	2982			Hemocyanin_C,Hemocyanin_M,Hemocyanin_N
TdChr004.1365	476.08	884.15	1451.96	825.94	491.58	489.09	514.93	566.11	76.63	1036.2	114.91	179.12	262.36	488.09	324.21	179.55	219.48	168.74	123.12	809.73	395.65	342.02	549.85	0.206016			Ribosomal_S10
TdChr003.1322	1307.4	724.97	580.63	721.24	308.63	291.26	282.82	304.33	208.84	454.92	417.38	274.9	262.84	288.86	404.87	563.04	317.9	296.08	230.07	378.44	296.34	1152.29	548.11	0.867082			Plug_translocon,SecY
TdChr001.344	3.68	3.1	1.17	1.15	0.21	0.43	1.21	0.7	1.68	0.79	0	0	0.12	0.17	1.97	0	0	0	0	0.54	0	0	544	421.45			PI-PLC-X,RicinB_lectin_2
TdChr005.170	2109.82	1068.9	767.46	965.7	319.33	176.23	339.91	436.19	72.54	469.44	66.5	69.26	85.23	157.74	77.25	87.55	83.13	87.09	57.57	829.3	141.63	42.56	540.11	0.900597			TRAP-gamma
TdChr006.056	0.71	79.93	6.2	81.59	3.3	0	0.18	0	0.19	0	0	0.13	0	0	0.29	0	0.19	0	0.17	0	0	0	539.11	898.467			Beta_elim_lyase
TdChr006.391	1.19	166.39	6.58	0	0.16	0	0	0	0.12	0	0	0	0	0	0.37	0	0	0	0	0	0	0	538.88	2245.75			Trypsin
TdChr006.1468	79.84	72.58	51.64	63.28	42.13	47.13	104.58	149.03	92.64	185.69	124.9	104.98	71.12	96.97	102.04	60.9	90.25	46.53	30.95	173.55	46.18	0.17	535.06	8.2047			GCS
TdChr002.467	0.07	5.59	204.62	538.76	364.01	21.22	22.12	0.83	12.82	0.21	16.09	6.03	0.17	2.82	5.7	30.03	12.92	0.16	1.46	0	0.93	0	533.51	24.8428			CBM_14,Glyco_hydro_18
TdChr005.244	52.91	647.29	62.36	148.72	368.81	293.67	529.06	723.26	567.42	810.63	397.71	151.85	203.96	365.48	3391.67	904.28	246.07	302.18	315.98	681.84	278.55	5.71	529.43	0.428956			NF
TdChr005.1863	490.47	416.12	242.96	304.64	724.81	490.78	592.41	550.13	834.27	552.66	598.24	1358.87	2305.37	1597.28	836.56	697.4	1108.18	2824.77	3391.66	302.92	477.85	1.44	527.19	-0.133358			ODC_AZ
TdChr001.2821	2.61	192.94	22.82	161.13	0.6	0	0.21	0.11	0.06	0.29	0	0.29	0	0	0	0	0.11	0	0.19	0.07	0	0	527.15	967.229			Drf_FH3,Drf_GBD
TdChr006.049	1.9	6.94	120.43	123.84	0.22	0.91	0.78	0.22	0.05	2.4	0.21	0.29	0.32	0.62	0.08	0.14	0	0.3	0.1	0.8	0.49	0	525.14	394.677			Sulfotransfer_1
TdChr002.3422	240.61	342.53	141.84	163.03	180.74	127.28	208.79	239.43	169.85	292.42	191.68	232.95	116.82	222.27	173.63	205.85	198.2	100.89	249.44	233.85	105.85	6.32	520.74	3.82706			Annexin
TdChr002.1998	0	2.06	4.68	24.14	0.51	0.09	0.07	0	0.19	0.06	0	0	0	0	0.29	0	0.38	0	0	0	0	0.52	511.08	937.835			DUF3456,EGF_CA
TdChr006.1979	0.47	13.34	10.34	124.36	68.19	43.89	51.09	18.44	161.91	5.82	224	89.15	104.28	63.33	198.19	372.68	82.48	180.88	144.97	1.17	97.88	1.42	507.99	3.09197			adh_short
TdChr001.2810	4.39	307.11	20.47	0.23	0	0	0	0	0	0	0	0	0	0	0	0	0	0	0	0	0	0	506.14	5062.4			CLIP,Trypsin
TdChr002.1236	1219.11	1843.27	1422.51	1074.91	794.44	251.93	651.94	980.24	351.5	1049.52	325.14	683.53	402.77	539	387.86	301.52	532.35	265.75	235.98	1374.4	643.22	605.61	504.52	-0.156501			NF
TdChr003.2159	109.89	263.31	1075.24	876.16	405.69	175.55	460.39	439.88	155.15	273.35	0	0	107.01	0	102.69	89.49	69.44	59.67	119	0	126.01	0	504.44	1.40163			Nop10p
TdChr003.1728	73.17	112.49	5.64	0.38	0	0	0.3	0.14	0	0.16	0	0	0	0	0.14	0	0	0	0	0.11	0	0	503.02	1524.61			Serpin
TdChr001.412	21.55	4.47	1.63	20.75	5	20.69	36.97	61.57	7.24	92.11	5.43	17.06	40.15	46.97	7.48	7.13	26.07	36.97	25.37	61.16	26.47	0	500.83	15.2305			NF
TdChr003.958	19.23	97.42	66.83	109.95	125.82	128.58	96.95	66.79	148.02	30.25	47.59	122.65	72.96	76.77	23.06	33.63	42.25	43.75	124.9	47.27	15.15	0	498.34	5.50102			Choline_kinase
TdChr005.858	447.18	537.36	291.69	335.72	1062.24	402.09	888.72	1241.01	1018.62	1229.44	499.07	766.03	471.06	679.43	993.02	678.81	859.36	515.11	794.98	1019.5	498.85	43.46	494.44	-0.402143			ubiquitin
TdChr001.804	3092.82	2048.38	1668.34	1056.5	301.97	292.01	777.85	1274.83	63.04	1486.19	76.92	83.82	187.59	555	115.56	88.64	106.24	104.31	64.13	1751.52	148.84	68.24	494.15	0.189135			EF-1_beta_acid,EF1_GNE
TdChr003.2184	312.76	1241.58	2380.5	1266.53	929.88	1144.35	3681.69	7505.55	326.64	9350.27	459.41	562.18	1043.92	3325.92	377.13	385.86	440.01	412.35	596.79	7261.23	582.25	8.68	493.2	-0.0740571			HATPase_c,HSP90
TdChr003.1140	598.17	1140.93	1228.66	946.99	512.8	576.56	611.13	562.91	222.39	775.8	164.5	226.23	214.77	316.44	233.1	194.98	306.38	227.87	118.52	626.75	275.36	4.23	492.28	0.462465			Cpn10
TdChr004.1748	351.2	541.7	777.46	576.89	426.73	2146.97	1217.18	385.44	680.1	761.98	417.95	941.07	821.75	1142.41	717.17	608.9	1138.88	835.74	1303.92	545.41	1291.78	35.16	492.01	-0.430144			COX6A
TdChr003.1632	1607.52	1277.96	1266.05	1406.24	1046.4	727.92	1520.51	1595.88	900.38	1026.63	335.02	512.33	442.9	533.19	843.2	418.86	639.33	298.64	313.7	1866.43	669.61	537.99	483.16	-0.315951			DSS1_SEM1
TdChr005.804	1509.38	651.9	765.44	817.47	248.22	116.2	247.12	363.65	38.9	429.94	51.18	45	61.99	150.28	50.1	49.06	48.54	40.72	44.88	495.34	49.42	67.04	481.51	0.89873			TRAP_alpha
TdChr001.2825	87.33	177.46	160.18	141.73	66.36	43.16	165.21	284.38	51.1	421.55	13.54	50.38	36.29	141.9	59.97	8.59	68.17	13.3	33.65	421.89	17.91	7.55	477.58	3.21784			CBS,PALP
TdChr006.1638	0.4	1.94	3.84	0.25	0	0	0	0	0	0	0	0	0	0	0	0	0	0	0	0	0	0	475.65	4757.5			NF
TdChr006.206	81.5	89.02	73.64	93.28	47.83	36.09	380.06	395.4	1539.28	218.37	210.45	906.01	524.91	1002.3	958.67	206.3	762.11	492.89	1684.57	134.23	233.97	0.94	472.02	0.431072			UDPGP
TdChr005.1486	2196.39	692.46	2212.2	1455.84	2493.7	2203.39	2108.94	3400.72	563.48	4281.05	821.52	783.67	1217.49	1728.27	509.41	1194.66	733.81	993.35	578.09	825.89	518.76	0.04	467.16	-0.346684			Tubulin,Tubulin_C
TdChr004.084	1478.57	531.73	669.48	562.64	475.91	340.64	491.14	653.48	211.83	883.12	288.02	432.01	465.96	726.9	319.09	310.22	371	386.2	685.37	461.2	310.92	5.84	465.69	0.000359331			Arf
TdChr002.2558	13.32	70.09	95.52	568.94	246.78	32.52	80.22	54.75	250.73	22.16	156.29	254.49	158.57	88	253.57	179.47	244.14	156.5	127.45	26.53	143.77	4.5	462.08	1.73862			SBP56
TdChr003.1432	1307.65	1926.04	916.96	742.44	270.41	355.26	386.42	485.33	79.58	524.42	38.46	115.78	89.05	225.35	91.94	37.63	102.92	59.39	51.7	519.48	85.83	2.58	442.31	0.517056			Cpn60_TCP1
TdChr003.2389	308.58	1570.89	444.98	521.12	567.8	331.34	790.19	301.07	745.15	197.06	180.03	408.77	373.46	259.77	461.74	182.96	439.57	341.88	262.86	309.01	741.05	60.87	440.93	0.32243			CH,Calponin
TdChr003.874	347.73	326.61	388.05	665.69	303.27	192.59	297.36	318.83	197.94	209.06	108.29	166.62	121.55	125.22	193.21	136	192.73	157.33	109.6	309.86	209.4	37.38	440.37	1.44552			SPC12
TdChr002.825	1.73	125.26	431.09	845.88	246.36	292.09	233.43	127.81	818.04	40.17	1026.36	484.46	1181.22	199.13	1089.51	1306.28	453.79	1031.81	164.16	7.88	1184.26	131.11	440.12	0.0115777			GST_C_3,GST_N
TdChr002.1818	1680.66	1754.4	2226.62	1651.12	1564.86	372.36	1306.4	1494.74	357.38	1061.75	163.83	297.83	293.6	427.97	137.06	255.01	247.22	194.44	157.96	1948.36	443.22	326.76	439.37	0.009159			Rad60-SLD
TdChr003.1981	1072.85	805.61	1052.38	853.5	609.83	1171.73	1789.21	824.57	399.99	748.37	152.41	283.02	245.21	370.32	215.38	132.08	254.63	173.17	190.81	491.4	233.48	5.04	437.13	0.0630374			ATP-synt_ab,ATP-synt_ab_C,ATP-synt_ab_N
TdChr002.2707	293.79	683.51	914.74	578.54	363.18	342.76	437.84	543.67	109.36	607.68	109.43	154.35	182.69	295.2	230.82	135.08	152.91	146.73	115.03	667.89	379.63	122.84	432.19	0.401982			Ribosomal_S13
TdChr001.789	1464.66	489.95	1533.05	994.36	636.66	379.9	878.41	1209.56	395.6	1795.62	96.71	414.41	243.51	675.85	223.64	80.31	552.44	132.56	153.29	916.31	215.23	299.36	431.37	0.000150628			NDK
TdChr005.556	0.2	9.71	0.84	0.84	11.19	0.2	0.24	0	0	0	0	0	0	0	0	0	0	0	0	0	0	0	429.85	1343.59			NF
TdChr002.087	879.59	605.89	395.03	241.75	537.07	83.68	333.69	465.28	709	330.62	90.35	724.02	316.18	475.23	701.04	127.15	637.83	272.53	345.5	329.05	446.71	0	429.02	0.122969			ACBP
TdChr005.143	9140.54	2033.67	5.33	1.88	0.92	92.67	920.54	1748.71	0.18	2043.86	23.2	14.34	141.96	786.51	0.39	9.38	7.85	14.04	0.84	1708.52	21.46	5.29	427.7	0.478997			NF
TdChr003.374	47.76	625.41	178.8	182.96	20.98	152.83	74.06	44.64	164.35	26.98	20.36	139.79	46.5	65.16	344.83	18.12	138.08	51.28	91.03	25.39	32.88	0.07	419.57	2.75326			3HCDH,3HCDH_N
TdChr001.211	0.51	28.28	20.46	59.67	47.03	0	4.78	1.57	21.61	0.24	92.78	11.95	5.46	13.66	76.91	11.42	10.06	18.24	35.24	0.34	16.13	0.16	418.25	14.1081			Kunitz_BPTI
TdChr006.050	148	491.05	526.2	1167.42	266.34	139.44	197.63	125.71	627.38	102.28	862.12	328.25	680.98	260.68	1283.61	1611.8	308.77	768.91	313.65	48.3	616.94	442.47	416.3	0.000235225			MAPEG
TdChr001.1056	248.88	205.78	81.18	39.98	97.32	41.79	25.27	9.14	52.61	0.64	16.79	215.35	28.81	38.41	8.63	17.61	188.83	25.64	55.62	0.77	16.3	0	414.58	5.16819			-
TdChr005.2051	2.09	25.16	107.2	147.01	41.74	1.3	2.7	8.88	0.54	4.45	2.74	0.16	0.12	1.93	3.7	0.16	0	0.43	0.21	7.2	1.6	0.07	411.41	52.3555			Sulfotransfer_1
TdChr001.2664	0.1	9.15	5.81	0.26	0.06	0	0.04	0	0	0	0	0	0	0	0	0	0	0	0	0.05	0	0	410.27	2647.55			NF
TdChr004.1360	647.19	1314.67	629.47	530.12	320.94	432.2	444.97	346.62	348.31	387.62	262.34	272.22	217.54	218.62	475.32	437.97	196.28	218.57	145.59	330.79	364.14	32.17	406.92	0.291959			Glutaredoxin
TdChr001.3404	1117.57	1946.63	593.44	506.85	366.31	1076.44	856.94	330.86	634.41	474.46	250.97	810.27	782.04	921.28	585.44	381.9	635.19	1035.81	1244.63	589.18	1218.26	19.62	405.01	-0.425488			-
TdChr004.1768	267.78	216.87	220.14	328.65	98.95	82.76	130.95	140.66	25.2	189.41	10.06	60.17	27.98	84.02	31.79	13.84	124.72	20	77.99	127.79	18.2	0.04	404.45	2.31354			SHMT
TdChr005.2194	5.43	394.02	139.61	172.01	63.91	6.21	16.11	12.5	58.07	2.65	18.15	72.53	69.69	43.89	54.63	34.43	106.1	124.32	100.24	3.43	69.08	0.06	403.97	3.88917			Serpin
TdChr001.2459	16.41	81.65	254.67	318.54	44.11	25.84	96.37	97.22	23.09	103.57	4.28	57.15	13.2	43.29	25.74	0.71	67.7	5.75	34.63	85.03	6.05	0	402.78	4.73176			FTHFS,THF_DHG_CYH,THF_DHG_CYH_C
TdChr003.1925	14.25	236.42	50.24	28.82	6.31	0.83	27.29	41.25	36.29	38.91	2.15	1.75	26.27	62.75	8.14	2.19	1.58	17.82	145.27	35.93	19.2	0.18	401.58	10.4484			MRJP
TdChr005.528	0.09	1.33	0.78	0.13	0.03	0.37	0.34	0.23	0.01	0.05	0.01	0.02	0.02	0.01	0	0	0.01	0.02	0.01	0.03	0.01	0	401.5	1487.33			NF
TdChr002.2675	0.79	0	29.1	76.46	26.47	2.07	1.54	0	0	0	0	0	0	0	1.16	0	0	0	0	0	0	1.04	400.29	276.131			NF
TdChr005.672	19.15	160	319.61	843.9	661.38	299.63	1029.64	673.67	440.73	278.59	459.3	713.12	580.31	358.94	738.3	687.16	567.35	483.1	440.57	328.55	413.7	836	399.4	-0.177569			DAP
TdChr004.1421	6.1	516.87	56.77	1198.64	45.37	5.34	13.82	24.95	32.26	7.39	259.14	67.73	287.74	55.72	75.13	7.08	4.97	34.75	10.82	1.14	1.24	0	397.94	5.63258			COesterase
TdChr005.221	241.56	196.74	255.05	262.39	77.08	79.34	208.08	244.39	412.26	217.82	59.63	416.68	174.92	226.93	223.01	74.02	365.91	155.78	216.36	159.55	116.73	1.08	397.61	1.59688			Aminotran_1_2
TdChr003.1376	520.41	934.86	377.34	414.92	347.82	693.31	1038.54	412.89	834.53	346.05	224.02	661.51	727.92	4120.2	284.88	235.88	780.74	753.53	5831.85	269.38	1440.62	51.51	393.42	-0.275369			Ldh_1_C,Ldh_1_N
TdChr001.548	397.72	505.06	347.52	385.89	203.57	115.4	73.84	89.64	28.69	115.81	52.32	34.56	35.14	46.96	27.62	46.54	37.61	22.77	30.35	103.08	20.57	3.25	392.44	2.67185			TRAM1,TRAM_LAG1_CLN8
TdChr006.916	9.51	868.75	373.53	335.58	177.21	26.59	163.53	86.19	296.46	54.82	49.75	118.73	182.31	100.22	740.52	64.4	167.69	188.88	183.28	8.83	435.29	4.81	392.2	0.875638			Aldedh
TdChr002.102	176.57	191.81	661.14	1154.38	762.62	211.51	1882.56	872.8	2096.64	621.32	409.35	1814.72	2638.55	7863.04	880.74	600.03	1756.68	2338.62	10402.7	400.84	2960.48	5.15	391.71	-0.303539			Glycolytic
TdChr001.124	0	51.1	11.76	0	0	0	0	0	0	0	0	0	0	0	0	0	0	0	0	0	0	0	391.61	3917.1			NF
TdChr002.1195	97.12	207.47	225.37	250.61	145.83	80.6	98.96	114.39	97.52	105.25	89.19	115.11	98.39	77.83	156.56	81.19	108.75	86.52	67.54	87.95	76.8	1.32	391.46	6.27571			Aldedh
TdChr003.2091	1139.17	525.5	918.28	1135.41	640.04	222.44	527.81	715.12	154.95	887.3	138.71	138.04	163.08	382.21	204.98	174.64	169.63	125.79	111.08	658.8	93.84	511.47	390.77	0.0176553			Thioredoxin,Thioredoxin_6
TdChr006.275	404.7	601.98	137.3	94.79	68.76	69.77	110.8	140.2	28.98	163.72	27.87	38.39	36.57	67.1	49.85	35.74	39.9	29.66	22.6	138.46	27.89	5.72	389.41	3.06241			HGTP_anticodon,TGS,tRNA-synt_2b,tRNA_SAD
TdChr003.672	26.12	115	63.61	59.33	76.84	61.74	110.76	87.36	142.06	94.7	313.7	123.61	94.48	88.25	92.59	121.93	105.06	83.98	77.13	91.32	86.34	1.9	388.18	8.25003			PQ-loop
TdChr002.1668	1506.97	2002.59	1046.68	1029.83	888.16	1095.66	2389.49	1034.32	2059.49	545.27	412.61	668.94	929.48	3313.77	402.49	552.1	822.01	808.04	2726.34	729.89	2929.36	78.49	386.46	-0.474431			ATP-synt_E
TdChr006.1035	4.03	361.43	7.1	8.07	0.22	0	0.36	0.1	0.28	0	0	0.13	0	0	0.07	0	0	0	0	0	0	0	382.31	910.5			NF
TdChr001.2480	1261.34	696.99	448.8	412.55	637.7	510.15	894.97	1083.37	617.89	1024.26	440.41	1239.15	762.3	773.5	561.57	510.94	846.99	588	623.46	982.75	1046.23	76.99	380.61	-0.599862			ubiquitin
TdChr006.600	0.36	15.3	12.35	6.98	1.12	111.97	68.31	3.9	26.88	1.02	4.72	91.61	13.42	8.02	14.99	5.1	76.43	6.02	9.92	0.15	0.64	0	376.8	19.7473			AMP-binding,AMP-binding_C,PP-binding
TdChr003.2081	148.9	116.59	156.06	172.54	227.9	123.44	225.05	226.33	611.36	174.18	263.55	381.58	361.35	234.88	785.67	412.5	315.39	351.84	266.48	68.69	382.76	0.3	376.65	0.692725			Cyt-b5
TdChr005.1459	2018.47	641.69	3299.85	1805.58	1686.81	484.25	1520.97	2055.87	514.78	1397.83	314.73	902.27	529.01	679.55	441.03	358.36	479.11	315.25	306.76	1141.89	459.18	0.42	375.62	-0.145827			NF
TdChr005.1631	1083.62	532.7	476.81	498.95	210.94	152.32	199.47	281.11	65.59	331.06	63.56	96.17	98.56	148.24	116.28	84.84	98.4	111.42	63.71	341.75	109.77	29.44	374.75	0.947287			TRAP-delta
TdChr003.1577	0	15.96	1.98	1.4	41.94	14.89	52.39	87.9	567.02	49.33	2366.15	274.37	270.45	204.28	1491.35	3776.09	270.21	414.35	274.15	14.57	79.31	0.19	374.43	0.92738			p450
TdChr002.2000	0.36	48.97	6.54	0	0	0	0.45	0.15	0	0	0	0	0.31	0	0.24	0.41	0	0	0	0	0	0	370.45	851.839			NF
TdChr001.1122	38.15	188.41	2	1.16	12	6.73	1.71	0.52	2.27	0	5.67	11.64	9.11	8.35	6.47	9.52	18.71	14.67	11.22	0	12.89	0.86	361.18	33.015			NF
TdChr002.3571	153.93	68.91	60.17	49.55	386.82	116.26	54.02	79.95	20.44	76.13	8.89	26	43.3	29.82	3.24	7.33	20.52	26.57	13.24	20.74	5.64	0	361.18	5.94227			Fascin
TdChr003.2046	2.04	149.39	1.83	0	0.06	0.21	1.02	0.95	0	0.9	0.06	0	0.17	0.25	0	0	0	0	0	0.87	0	0	360.28	351.532			Hemocyanin_C,Hemocyanin_M,Hemocyanin_N
TdChr005.578	75.27	47.83	460.16	748.15	221.97	161.36	146.93	156.63	150.26	150.88	136.7	80.82	102.83	80.99	90.63	105.46	88.87	91.91	60.27	46.77	48.13	1.64	359.27	3.38399			EF-hand_7,FKBP_C
TdChr004.2268	594.2	423.82	342.26	485.02	215.52	198.71	244.71	300.08	114.56	393.44	112.12	168.21	191.66	239.44	214.44	190.62	200.63	225.17	164.26	373.2	249.04	281.36	357.09	0.761692			EMP24_GP25L
TdChr005.1854	33.6	603.8	4.09	0	0.26	0.25	0.29	0.35	0.02	0.07	0.03	0.17	0	0.04	0	0	0	0	0.11	0.48	0	0	356.42	848.69			NF
TdChr001.2559	267.78	167.64	80.34	61.14	25.27	30.41	53.87	72.13	13.23	95.96	16.43	17.62	18.75	45.3	14.65	22.35	22.23	20.83	10.54	132.24	27.96	2.22	356.07	5.6442			WHEP-TRS,tRNA-synt_1b
TdChr002.3686	141.52	1037.25	821.38	597.42	588.94	455.01	214.15	170.07	165.73	177.23	170.8	274.83	209.5	170.7	305.22	214.05	262.65	207.54	162.32	215.34	484.09	9.89	354.27	0.599256			Ribosomal_L18
TdChr005.1667	293.68	1549.25	549.93	528.09	920.86	872.51	897.43	605.96	1899.86	472.87	1039.82	2932.67	2129.23	3134.71	3110.01	1057.4	3423.25	2343.53	6028.92	518.16	2729.55	7.67	352.78	-0.343877			Ferritin
TdChr005.1666	260.81	1073.08	441.7	518.07	782.07	605.15	705.87	508.3	1742.85	308.17	632.79	1737.01	1325.39	1646.54	2111.75	682.97	2025.14	1524.42	3139.1	264.78	1712.11	10.64	352	-0.293725			Ferritin
TdChr002.2067	0.22	11.2	1.46	9.39	9.01	53.63	22.79	6.26	44.39	1.44	43.43	62.48	47.89	16.43	13.48	119.29	54.15	46.65	32.41	4.38	35.4	0.17	350.2	8.24236			MFS_1,Sugar_tr
TdChr003.2350	20.06	68.46	1.01	0	1.79	3.78	36.15	0.07	2.37	0.17	0	0.07	0	0	0.08	0	0	0	0.09	0.03	0	0	350.13	160.624			NF
TdChr004.1367	518.01	1156.27	569.47	393.2	510.41	1147.17	369.91	235.23	296.26	383.22	278.77	482.49	423.92	404.68	802.05	456.42	605.25	474.77	399.41	376.04	1004.07	18.89	348.71	-0.439587			Ribosomal_S10
TdChr002.2585	0	10.96	22.13	88.08	0	0	0	0	0	0	0	0	0	0	0	0	0	0	0	0	0	0	347.68	3477.8			NF
TdChr004.2154	0.41	37.2	2.55	6.59	0.77	1.72	1.85	4.15	18.59	0.8	0.85	26.2	2.96	18.31	46.08	2.23	48.14	16.99	56.62	0.83	24.14	0	347.57	14.3223			COesterase
TdChr002.2375	302.02	504.99	754.29	554.01	559.03	748.71	684.15	569.9	437.59	739.77	339.25	511.1	383.2	433.35	492.45	414.91	569.41	333.49	253.5	736.68	339.95	2.83	341.66	-0.658179			MitoNEET_N,zf-CDGSH
TdChr006.1972	4.74	3.72	72.65	164.8	95.24	52.42	71.62	42.85	112.05	21.34	16.58	116.61	93.78	98.16	39.64	12.68	74.12	57.84	154.16	22.26	12.94	0.48	340.81	3.63656			5_nucleotid
TdChr002.228	0.38	14.08	2.31	0.3	1.11	0	0.02	0	0.05	0	0.03	0	0	0	0	0	0.05	0.09	0	0	0	0	340.11	1153.25			GMC_oxred_C,GMC_oxred_N
TdChr003.2047	1.96	164.31	2.74	0	0	0.11	0.06	0.07	0	0.04	0	0	0	0.08	0	0	0	0	0	0.08	0	0	335.17	1862.61			Hemocyanin_C,Hemocyanin_M,Hemocyanin_N
TdChr006.1639	0.54	0	1.78	0.1	0.05	0	0	0	0	0	0	0	0	0	0	0	0	0.1	0	0	0	0	334.08	2673.44			NF
TdChr002.828	488.06	1628.97	1736.35	1926.71	851.96	357.17	251.58	242.62	264.59	237.33	103.4	100.4	206.23	133.79	1179.13	80.22	93.11	130	39.3	241.01	94.58	108.86	332.71	0.28997			GST_C_3,GST_N
TdChr003.780	99.83	474.07	160.98	230.78	167.68	157.74	110.24	85.72	148.23	86.83	62.53	402.62	142.62	194.3	274.07	100.81	380.89	148.66	243.19	56.86	198.2	8.82	331.46	1.27094			NIPSNAP
TdChr005.842	19.42	60.24	36.61	38.93	40.8	34.02	49.07	50.8	62.68	50.58	77.09	66.18	71.8	46.47	63.33	104.57	73.71	92.49	43.88	71.53	80.26	1.19	329.88	8.83959			GSH_synth_ATP
TdChr006.1633	2695.18	363.78	1668.95	884.55	1102.19	422.42	962.26	1321.44	187.89	1607.48	206.52	408.55	376.25	655.49	277.63	172.6	218.75	175.29	217.14	579.66	258.14	3.26	327.94	-0.0683287			RRM_1
TdChr001.290	1180.91	920.01	748.48	842.34	489.54	332.49	309.02	515.59	168.97	527.04	125.47	156.91	290.56	427.92	104.22	79.2	262.04	191.51	399.21	740.18	172.03	0	326.79	0.000284969			SecE
TdChr001.3643	0.09	6.39	0	0.07	0.2	0.25	0.31	0.07	0.11	0	7.34	0.09	0.21	0.33	0.5	0.84	0.58	0.32	0.25	0	0.16	0	326.28	749.816			NF
TdChr001.2562	18.66	204.6	271.13	349.61	71.35	556.03	94.14	40.43	49.19	107.07	18.58	230.78	36.31	87.22	53.35	22.29	274.18	25.26	88.37	54.71	32.33	0.73	324.78	1.38186			Pterin_4a
TdCtg087.004	11.07	8.25	55.42	46.27	125	1368.05	43.46	32.25	34.99	241.73	228.63	403.68	330.11	445.51	861.1	204.9	287.93	383.35	377.91	164.94	589.26	0.15	321.54	0.276927			NF
TdCtg087.006	11.07	8.25	55.42	46.27	125	1368.05	43.46	32.25	34.99	241.73	228.63	403.68	330.11	445.51	861.1	204.9	287.93	383.35	377.91	164.94	589.26	0.15	321.54	0.276927			NF
TdChr002.820	25.59	28.33	8.07	6.97	11.62	113	117.3	128.16	232.75	126.16	48.4	447.04	66.86	58.29	64.95	8.75	482.46	62.07	25.71	116.54	23.01	25.15	320.25	2.67759			GST_C_3,GST_N
TdChr003.1453	675.73	249.38	476.31	955.45	249.52	129.15	471.14	614.08	108.21	547.17	70.3	69.77	78.26	221.6	130.94	142.93	84.02	86.63	63.22	590.23	30.27	101.92	320.04	0.456139			HATPase_c,HSP90
TdChr005.1617	866.24	635.29	4090.04	2457.76	2038.21	409.6	792.19	1055.23	221.33	983.72	402.84	737.42	535.57	583.33	475.22	392.91	471.67	400.48	360.35	1232.18	396.67	0.77	312.42	-0.423643			DEK_C,SWIB
TdChr003.096	762.12	503.74	929.95	756.44	669.13	587.21	436.36	275.67	345.26	90.81	160.22	249.45	313.47	195.05	443.52	342.21	422.52	452.07	328.53	335.19	338.91	156.55	308.89	-0.178867			Elf1
TdChr003.159	122.31	242.48	108.68	110.76	237.69	111.73	127.64	139.34	225.45	134.72	159.65	83.48	259.89	263.23	232.28	248.29	55.59	169.91	550.31	98.42	40.18	0.81	308.51	1.29744			Cys_Met_Meta_PP
TdChr001.2755	19.85	505.01	118.18	658.31	2705.7	2789.9	658.78	408.96	3685.81	68.74	1108.63	7933.11	4428.1	5212.91	3389.03	1099.41	5091.24	3258.08	7681.73	59.21	2154.79	0	308.12	-0.251782			NF
TdChr001.3051	1.3	80.86	4.34	67.66	0.75	7.74	5.86	5.24	0.17	0.86	0.1	0	0.34	0.21	0.2	0.2	0	0.14	0.05	0.46	0.72	12.01	307.79	56.2068			CBM_14,Glyco_hydro_18,LysM,Self-incomp_S1
TdChr006.154	792.46	500.28	530.14	543.03	298.68	143.33	227.53	224.05	166.53	259.08	124.63	123.77	177.8	184.5	188.41	175.23	168.2	173.71	141.63	221.69	118.18	134.58	307.61	0.993229			Arf
TdChr002.3310	372.63	475.76	432.03	399.98	288.5	0	949.6	775.38	616.14	0	47.58	0	282.04	0	662.58	478.9	619.8	1294.37	586.04	0	415.58	0	307.37	-0.160218			NADH_oxidored
TdChr001.125	0	48.52	4.44	0	0	0	0	0	0	0	0	0	0	0	0	1.44	0	0	0	2.59	0	0	306.81	3069.1			NF
TdChr004.580	21.9	116.89	106.89	276.51	330.51	91.63	109.26	36.92	160.01	14.69	47.26	63.62	78.57	47.83	41.42	61.01	38.26	69.01	98.18	13.56	29.15	2.35	305.68	3.43076			HAD,Hydrolase
TdChr006.489	93.65	249.65	1329.53	706.49	489.4	318.28	421.38	483.7	134.63	586.84	152.21	223.51	211.54	296.36	265.68	203.4	210.23	169.46	113.59	882.6	431.66	0	305.18	0.145937			Ribosomal_L29
TdChr006.1658	56.61	269.95	324.94	381.58	263.49	106.5	117.18	129.6	82.75	154.05	46.27	94.87	79.22	99.12	173.83	52.15	102.64	84.73	82.06	115.43	82.51	0.51	303.88	2.46272			Peptidase_M17
TdChr005.667	7.06	162.91	275.39	1062.49	727.87	114.49	102.35	79.35	350.92	31.06	177.06	301.87	26.3	85.06	606.27	254.25	278.57	20.05	105.04	18.69	75.64	4.39	303.01	0.795966			Aldedh
TdChr006.701	0.08	22.26	2.19	0.33	0.12	98.25	124.21	6.87	27.61	0	1.7	277.97	50.54	6.18	0.19	0.98	227.53	14.88	6.15	0	5.39	0	302.96	7.62971			Pyridoxal_deC
TdChr004.871	1089.23	732.48	369.73	452.13	246.22	142.57	261.99	288.23	172.72	272	122.59	121.99	131.46	164.71	162.11	205.73	172.7	191.35	140.68	375.64	238.2	16.62	301.53	0.672322			EMP24_GP25L
TdChr002.060	870.41	658.54	184.84	239.56	170.31	187.89	132.11	207.88	21.87	359.02	55.54	53.13	51	139.17	63.69	79.08	65.56	29.08	28.93	296.78	51.83	90.28	299.41	0.987698			EMP24_GP25L
TdChr002.1282	257.32	473.96	809.65	656.14	405.93	1773.61	1780.92	453.99	961.62	499.93	371.51	691.81	1034.84	3046.83	480.6	482.88	820.56	1027.93	3497.24	518.35	1984.26	618.77	299.25	-0.643787			COX7a
TdChr002.3655	632.97	768.36	921.24	474.79	192.47	166.57	357.61	350.58	60.1	340.96	73.93	87.87	102.85	127.64	149.86	103.72	101.52	84.21	54.26	422.35	156.43	33.35	296.79	0.541272			40S_SA_C,Ribosomal_S2
TdChr001.3334	35.58	92.44	49	55.41	144.83	41.48	52.96	45.28	178.65	20.55	31.85	277.96	83.71	104.02	68.52	35.34	145.71	68.1	139.8	17.14	59.55	0.33	296.68	2.84176			A_deaminase
TdChr005.391	252.62	462.47	886.88	428.3	300.08	195.42	210.19	250.26	60.87	289.3	63.04	110.49	113.13	147.98	178.51	101.85	114.71	113.58	69.71	398.16	249.36	22.91	291.39	0.537801			Ribosomal_L22
TdChr001.2462	0.56	50.74	1.17	0.43	0.67	0.06	0.05	0.05	0.07	0.13	0.19	0.32	0	0.09	0.27	0.06	0.5	0.13	0.3	0	0.11	0	290.32	574.832			NF
TdChr001.1015	20.2	7.01	1.55	2.14	32.68	24.46	10.17	2	28.64	0	0.39	7.67	0.93	43.98	7.86	0.09	5.74	1.99	66.72	0	0.46	0	290.22	13.0932			NF
TdChr002.3566	967.93	1015.25	1195.34	1077.97	956.99	686.14	1752.52	2169.05	1465.42	1676.01	377.34	1469.45	538.9	852.87	344.98	337.1	664.7	246.02	422.91	1450.73	124.09	53.74	289.31	-0.585732			EF-hand_1
TdChr005.767	113.53	140.26	308.88	221.31	89.74	186.8	223.44	216.66	42.21	328.07	69.48	120.63	134.26	254.63	111.1	77.24	120.58	109.16	117.31	531.69	155.7	15.95	287.47	1.36464			Complex1_LYR
TdChr001.476	334.6	1032.42	1576.78	702.16	350.97	370.88	898.63	1261.8	57.49	1590.25	92.54	190.76	291.08	651.88	154.43	107.05	172.8	171.67	106.29	1224.9	300.38	43.91	286.32	-0.0218999			NAC
TdChr001.3420	455.4	263.05	374.55	449.43	234.46	137.52	218.27	297.07	127.51	292.05	138.42	160.23	174.07	209.24	188.02	182.08	187.13	176.93	141.99	388.98	252.69	168.14	285.29	0.647176			EMP24_GP25L
TdChr002.3031	1187.27	498.41	788.86	488.26	233.33	317.62	1676.98	1056.27	1458.07	901.82	350.51	794.99	2799.98	10424.4	394.87	293.88	792	1863.22	11033.3	489.12	5126.58	0.55	284.61	-0.424534			Mito_carr
TdChr001.272	345.38	487.49	1173.52	794.18	664.23	978.82	1736.8	803.18	425.69	905.85	161.14	334.18	360.46	488.93	207.55	183.6	384.34	375.51	357.69	1033.23	626.45	1.28	284.43	-0.307538			COX5B
TdChr002.2252	701.95	1175.38	685.62	633.58	447.74	655.94	1237.61	430.69	557.33	347.11	129.99	242.35	224.28	257.63	192.52	152.01	284.66	239.19	214.64	396.51	518.74	63.88	282.56	-0.177148			Mt_ATP-synt_B
TdChr002.3629	0.34	8.77	25.78	39.13	21.55	2.63	4.21	4.37	22.49	1	1.66	1.79	3.77	4.37	20.39	1.19	0.96	4.28	4.83	0.4	0.23	0	280.63	20.3548			MFS_1
TdChr002.938	40.96	21.7	205.84	135.62	135.55	44.72	205.53	99.91	176.92	109.18	64.67	271.76	256.59	277.61	172.69	116.71	247.59	287.37	468.43	56.03	529.37	8.9	280.52	0.593071			SelR
TdChr001.971	0	5.32	0.52	5.14	1.83	0	0	0	0.1	0	0	0	0	0	0	0	0	0	0	0	0	0	279.61	1864.73			NF
TdChr001.499	885.93	545.77	1130.42	647.16	896.09	734.59	667.92	703.98	461.85	764.24	208.05	772.01	314.75	583.35	221.1	105.57	197.01	134.47	473.24	288.23	100.99	0	278.94	-0.384699			41701
TdChr003.1815	0.2	15.81	80.84	201.87	18.35	4.5	18.88	2.17	21.45	0.42	0.28	20.2	1.88	4.93	15.82	0.29	26	2.87	16.68	0.12	3.96	0	278.3	14.7902			AIRS,AIRS_C,GATase_5
TdChr006.935	8.45	169.49	3.16	163.75	0	0	3.37	10.05	37.4	0	0	264.74	14.79	42.8	19.8	0	442.51	19.99	105.9	0	12.09	0	277.85	3.57099			NF
TdChr002.1163	32.34	468.25	185.63	374.43	119.79	101.91	253.46	132.81	416.87	62.26	118.67	229.5	206.22	172.15	231.51	69.75	94.56	146.09	162.23	68.92	222.92	2.55	276.36	0.86296			Annexin
TdChr002.711	161.8	355.61	632.23	332.49	231.25	263.89	263.49	285.65	98.23	338.14	113.17	172.85	190.25	195.93	318.76	168.33	169.41	154.87	109.52	382.64	400.7	21.65	272.06	0.254637			Ribosomal_L15e
TdChr001.1189	0	4.96	1.69	0.27	0.1	0.09	0.1	0	0	0.06	0	0	0	0	0	0	0.15	0	0	0.04	0	0	271.97	1360.35			Trypsin
TdChr001.329	1.62	5.72	18.9	157.97	17.85	89.7	47.43	23.82	153.94	9.44	110.43	287.58	223.94	189.21	215.66	119.81	193.16	149.83	151.88	2.71	106.61	79.94	271.35	1.05705			adh_short
TdChr006.899	7.29	504.49	13.07	227.72	6.43	0	483.09	88.96	742.91	34.46	7.9	334.32	330.43	189.05	627.39	18.08	706.61	346.39	365.52	0	330.47	0.82	271.26	0.126284			Prokineticin
TdChr004.1886	2015.04	1444.26	1145.49	822.23	391.34	606.61	1019.31	978.89	219.99	1113.68	88.83	280.99	237.69	536.19	113.55	85.33	287.29	153.67	369.23	1110.41	207.5	26.55	270.82	-0.125163			Porin_3
TdChr002.2018	397.26	311.06	1380.3	599.82	575.05	464.02	1106.3	1421.21	207.44	1352.27	123.76	344.7	303.1	577.44	268.87	141.78	236.71	166.16	175.19	641.65	188.85	0.47	269.55	-0.10602			HABP4_PAI-RBP1,IHABP4_N
TdChr003.1489	3052.82	1030.84	2352.09	1673.29	2601.41	1849.69	2083.6	3297.61	369.04	3632.54	180.32	457.75	974.51	1507.33	279.39	241.87	451.92	760.46	424.8	1765.26	928.45	0.36	268.85	-0.449451			Tubulin,Tubulin_C
TdChr001.2226	896.49	518.43	384.67	371.36	146.74	143.23	307.63	412.85	79.55	496.86	79.56	145.17	122.08	239.96	116.06	99.99	148.2	83.01	84.25	488.26	100.91	8.75	268.48	0.438802			AdoHcyase,AdoHcyase_NAD
TdChr002.007	316.81	139.6	124.86	124.54	128.34	58.24	157.25	263.89	68.5	284	47.6	60.8	75.46	116.51	66.97	75.75	55.57	66.71	68.08	250.89	74.64	14.93	266.93	2.34168			Thioredoxin,Thioredoxin_6
TdChr002.2654	1206.77	648.59	607.91	695.5	2005.2	1817.35	1307.97	1085	1555.21	950.26	691.95	1480.29	1500.48	1049.79	1995.02	1410.12	1744.41	1578.66	1509.57	304.28	1250.34	4.81	266.74	-1.17256			bZIP_1
TdChr006.1637	0.06	0.11	0.59	0.11	0.06	0	0.09	0.01	0.01	0	0	0	0.02	0	0	0	0.05	0.02	0	0	0	0	266.51	1666.25			NF
TdChr005.1131	856.86	685.75	628.14	498.54	208.62	133.11	411.05	658.98	182.23	761.39	112.78	247.35	247.82	379.37	206.62	183.63	314.13	263.42	232.94	783.07	237.03	55.11	266.11	0.00784104			EF-1_beta_acid,EF1_GNE
TdChr006.629	306.68	1041	531.29	440.72	274.46	956.52	554.88	183.81	207.4	299.02	141.45	281.08	547.43	1371.23	326.81	179.26	346.28	588.54	1792.97	214.69	746.29	69.05	266.1	-0.182882			IATP,Myb_DNA-bind_5
TdChr003.1732	0	1.74	2.07	0	0	0	0.37	0	0.74	0	0	0	0	0	0	0	0	0	0	0	0	0	265.72	2658.2			NF
TdChr006.565	10.2	628.65	331.69	300.99	72.7	78.02	48.35	12.29	108.95	0.89	54.65	120.71	50.06	36.64	40.54	108.83	137.84	29.76	62.63	0.46	6.81	0.2	265.26	2.24386			Acyl-CoA_dh_1,Acyl-CoA_dh_M,Acyl-CoA_dh_N
TdChr005.409	19.64	64.78	2.52	9.99	0	0	0.27	0	0.09	0.33	0	0	0	0	0	0	0.19	0	0	0	0	0	264.92	662.55			NF
TdChr001.357	0	61.24	7.47	1.8	0	0	0	0	0	0	0	0	0	0	2.1	0	0	0	0	0	0	0	260.34	2604.4			Pacifastin_I
TdChr001.300	0.12	21.58	0.91	0.06	0.21	0.49	0.23	0.12	0.66	0.05	1.27	0.08	0.09	0	1.1	2.29	0.34	0.14	0.16	0.09	0.07	0	258.54	323.1			Peptidase_M13,Peptidase_M13_N
TdChr002.3334	1.51	59.32	153.68	147.42	5.07	2.76	1.16	0.67	0.06	1.28	0.23	0.49	0.24	0.69	0.19	0	0.86	0	0.43	1.78	0	0	258.19	119.259			Sulfotransfer_1
TdChr005.1853	0.23	239.15	1.75	0	0	0	0	0	0	0	0	0	0	0	0	0	0	0	0	0	0	0	258.1	2582			NF
TdChr004.2197	1.46	4.11	0.95	0	0.5	0.93	83.02	68.94	125.18	19.07	10269.3	91.45	149.56	135.55	61.57	141.91	41.89	198.54	62.65	6.39	453.45	0	250.27	1.37984			NF
TdChr001.2366	2.94	125.95	1.73	130.78	0	0.12	0.37	0	0.05	0	0	0	0	0	0	0	0	0	0	0	0.11	0	250.06	725.101			LPMO_10
TdChr002.822	39.55	69.1	5.58	1.39	0.15	0.35	0	0.07	0.23	0	0.09	0	0	0.91	0.58	0.49	0	0.2	0	0	0.08	0	245.76	290.781			NF
TdChr005.125	360.76	288.24	203	147.56	65.92	52.91	120.73	192.47	32.56	216.49	32.77	57.41	47.22	100.41	49.2	39.97	58.61	42.14	35.81	247.24	54.04	2.79	243.98	1.211			tRNA-synt_2,tRNA_anti-codon
TdChr001.2813	0	0	2.68	1.3	0	0.15	0.3	0.38	0	0.11	0	0	0	0	0.29	0.08	1.94	0	0.67	0	0	0	243.88	554.5			CLIP,Trypsin
TdChr001.445	0.78	94.2	1.94	0.78	0.46	1.97	0.94	0.4	2.9	0	0	8.46	0.18	2.49	0.62	0	6.55	0	5.51	0.15	0	0	243.53	89.2831			ACT,Biopterin_H
TdChr004.2262	847.37	394.63	225.27	249.09	145.17	82.73	105.44	134.56	98.21	223.06	157.58	145.41	114.85	125.72	211.52	180.65	142.7	105.66	102.09	130.56	87.2	10.5	243.08	0.898426			SURF4
TdChr005.405	60.11	117.33	6.1	30.54	392.1	62.37	148.36	106.49	209.9	46.59	5.9	722.92	113.99	317.56	575.97	6.59	938.77	73.46	423.28	50.41	4740.11	42.63	242.48	0.419639			Kunitz_BPTI
TdChr006.057	0	14.57	1.5	0.04	0	0	0.05	0	0	0	0	0	0	0	0	0	0	0	0.34	0	0	0	241.17	2010.58			Beta_elim_lyase
TdChr006.1952	2286.19	1179.2	2612.85	1252.87	811.33	523	2254.47	3312.86	54.59	3421.09	93.11	168.8	306.31	1159.17	108.95	105.82	123.26	118.01	54.64	4860.43	200.59	76.89	240.92	-0.0398039			Nucleoplasmin
TdChr003.914	0	0	12.07	184.44	0.49	0	0.28	0	0.14	0	0.02	0	0.9	0.18	0.06	0	0	1.18	0.2	0	0	0	239.55	494.082			NF
TdChr006.389	0.98	5.39	1.94	0.32	0	0.35	0.09	0.1	0	0.09	0	0.13	0	0	0	0	0	0	0	0.24	0	0	239.5	630.526			Trypsin
TdChr005.1062	730.33	978.15	560.42	372.38	210.9	468.45	650.91	261.4	245.4	290.71	135.11	292.27	253.79	274.35	199.14	150.35	307.31	350.41	286.04	282.55	695.53	0	239.18	-0.262365			ATP-synt_G
TdChr003.604	76.99	87.07	73.76	85.16	42.64	28.24	76.28	136.56	31.37	142.36	14.81	28.94	29.05	63.97	25.27	18.44	27.08	23.13	26.53	144.38	20.5	0.74	238.38	3.7469			tRNA-synt_1e
TdChr003.004	556.57	95.69	351.49	252.43	161.64	74.9	164.87	260.91	51.68	116.26	15.91	37.53	19.91	52.5	13.5	9.58	13.08	8.49	16.47	69.47	3.74	0.75	235.93	1.23465			SNase,TUDOR
TdChr001.2783	13.49	36.12	22.15	28.48	55.03	39.85	37.94	18.02	80.44	8.55	59.79	48.69	84.41	33.86	113.83	108.5	66.84	105.64	71.65	12.98	116.2	0.11	235.65	3.26971			Dynamin_N,EF-hand_4,EHD_N
TdChr003.2024	16.36	10.96	29.45	34.91	78.72	12.92	26.03	33.92	10.58	37.17	22.31	5.2	8.4	16.06	19.59	15.06	7.3	10.83	14.08	36.77	8.8	0.1	234.29	10.3572			STAS,Sulfate_transp
TdChr005.1868	272.91	131.01	207.78	262.73	135.26	78.72	107.17	93.46	77.83	88.06	73.09	67.56	68.06	60.1	71.14	70.11	56.48	64.54	60.63	119.61	44.26	2.24	233.38	2.62214			Peptidase_A22B
TdChr006.2100	204.6	101.35	162.83	164.23	220.01	271.49	529.19	954.32	262.11	1166.32	140.95	316.4	223.13	528.57	188.73	110.3	179.58	59.13	177.88	171.68	25.66	0	232.44	0.380923			NF
TdChr006.2064	95.83	285.71	505.34	481.17	232.17	150.95	270.94	147.24	94.42	137.35	133.81	138.35	164.67	95.59	235.96	201.54	115.16	96.66	60.97	279.74	174.9	185.83	232.08	0.615518			HIT
TdChr002.340	2347.81	1208.63	1302.84	669.9	409.8	303.64	765.71	1119.55	69.04	1341.14	76.99	196.44	250.35	517.1	126.16	106.49	173.82	130.83	113.95	775.25	132.17	1.45	230.75	-0.0303698			Ras
TdChr006.207	43.83	146.71	317.35	525.12	116.59	38.21	72.29	40.73	94.16	35.14	2.35	173.11	23.96	64.18	46.85	24.33	190.51	15.94	75.49	32.71	26.84	0	230.37	1.80064			FBPase
TdChr005.145	0.72	48.57	5.52	1.22	0	0.19	0.55	0.2	0	0.29	0	0	0	0.23	0	0	0	0	0	0.34	0	0	229.57	421.413			NF
TdChr004.1458	40.27	135.9	63.47	43.49	50.58	62.02	107.64	105.16	166.67	106.82	151.78	153.61	143.62	115.42	235.15	145.93	189.75	164.64	110.42	162.6	150.16	20.19	229.08	1.26242			Aldo_ket_red
TdChr002.2549	917.82	1812.6	631.49	508.84	303.15	649.93	1151.79	346.48	540.88	288.9	160.16	376.33	486.72	555.94	221.25	211.21	480.51	513.42	757.29	384.9	942.76	0.21	229.06	-0.747016			Mt_ATP-synt_D
TdChr001.2369	1.24	7.98	20.56	4.19	45.97	13.02	13.43	1.52	10.72	0	0	0	0	0	24.95	0	0	0	0	0.13	1.12	0	229.03	19.0485			LPMO_10
TdChr001.3007	515.42	875.64	2041.61	937.92	1377.25	484.01	1265.43	1013.48	1099.98	1010.73	263.16	547.51	434.95	536.11	733.95	309.17	575.51	360.08	307.92	786.48	560.33	24.19	228.95	-0.574232			1-cysPrx_C,AhpC-TSA
TdChr003.689	0.51	42.42	3.86	2.16	36.97	60.46	19.24	36.9	299.49	6.51	179.35	88.86	441.12	185	13.24	121.72	38.52	75.41	34.94	0.59	71.64	0	225.89	1.96273			ELO
TdChr001.2820	0	3.24	1.33	7.02	0.08	0	0	0	0.28	0	0.43	0	0.11	0	0.26	0.07	0	0.2	0	0	0	0	225.19	608.892			CLIP,Trypsin
TdChr003.644	362.87	1449.41	224.82	316.44	1384.56	315.64	612.69	391.58	1122.32	261.23	788.95	332.81	793.82	296.81	1795.01	464.64	613.37	1115.69	588.87	291.15	1014.16	13.52	223.95	-0.402415			Inhibitor_I29,Peptidase_C1
TdChr002.580	246.07	285.28	162.74	230.42	97.19	63.1	143.15	176.96	79.97	217.3	28.38	30.77	47.72	87.85	104.31	90.56	63.64	90.97	36.13	319.61	63.23	137.63	223.76	0.946747			DUF3456
TdChr002.120	72.09	142.27	700.78	729.89	951.5	294.05	612.29	674.93	296.52	488.51	175.78	373.14	230.01	406.84	324.73	328.12	378	264.46	219.45	790.47	549.04	12.19	223.58	-0.295053			NF
TdChr002.2074	196.17	338.63	150.33	312.28	77.09	48.26	97.29	104.22	76.52	139.88	55.18	57.78	50.81	64.16	62.03	48.91	61.24	44.52	25.49	168.71	56.81	238.8	223.01	1.41462			1-cysPrx_C,AhpC-TSA
TdChr002.3647	0.23	5.65	20.11	53.97	54.35	75.99	27.67	8.48	16.36	3.79	2.89	26.21	4.77	2.18	25.07	1.48	23.03	4.43	1.58	3.54	4.42	1.32	222.62	9.63685			MFS_1,Sugar_tr
TdChr004.784	886.95	997.73	493.05	390.74	336.24	727.97	1004.04	419.33	355.15	432.46	169.7	336.36	295.73	410.23	209.2	207.3	386.91	262.83	343.24	558.6	615.58	2.85	221.3	-0.671045			COX4
TdChr002.314	338.66	229.24	226.3	342.25	188.18	143.91	165.24	172.37	173.77	200.24	225.81	221.49	209.57	167.72	268.53	319.14	260.47	240.74	186.43	182.94	258.56	210.93	220.32	0.00153692			OST3_OST6
TdChr006.2171	0.24	8.75	1.98	54.8	13.75	31.8	62.05	68.98	302.98	19.43	1730.73	389.3	368.94	189.74	299.28	291.59	481.36	368.15	264.1	6.05	550.21	278.58	219.1	0.000322529			NF
TdChr001.2438	2.43	414.96	17.56	0	0	0	1.89	0	0	0	0	0	0	0	0	0	0	0	0	0	0	0	218.89	2189.9			-
TdChr005.1228	298.64	714.37	159.87	238.22	269.28	88.32	55.24	85.79	17.41	117.14	10.43	28.78	34.25	44.61	47.87	5.8	44.17	20.87	20.46	86.86	21.2	0.23	218.76	1.45437			Aminotran_5
TdChr005.543	731.45	549.95	484.74	326.96	179.07	213.04	520.34	746.85	87.97	845.32	72.63	78.26	126.8	355.05	109.87	87.29	96.36	84.23	80.07	804.91	130.72	94.03	216.77	0.0918278			IF4E
TdChr004.821	1928.98	2297.77	1202.82	738.55	829.17	423.79	438.78	402.8	137.56	491.25	132.61	207.77	205.96	257.99	263.44	251.52	185.83	204.5	130.19	457.39	387.08	3.01	216.56	-0.173781			Cofilin_ADF
TdChr004.309	36.55	168.25	548.96	328.39	157.76	88.41	88.39	97.15	37.31	161.91	91.04	143.58	118.22	137.03	144.36	73.35	99.79	63.45	47.55	177.97	213.45	1.27	215.7	1.1574			Ribosomal_L5,Ribosomal_L5_C
TdChr001.465	1.07	38.67	1.08	9.37	300.25	40.28	1.74	0	1.67	0	0	0	0	0	3.37	0	0	0	0	0	0	0	215.61	81.2467			NF
TdChr005.1398	0	1.99	5.43	0.75	0	0	0	0	0.26	0	0	0	0	0	0	0	0	0	0	0	0	0	214.62	2147.2			NF
TdChr003.460	34.31	66.59	39.72	46.54	31.2	37.75	74.79	59.21	90.82	29.57	28.7	174.33	71.27	85.54	19.99	9.47	49.58	17.58	116.51	34.83	4.4	0	212.24	3.92363			Sugar_tr
TdChr002.283	610.7	966.22	577.65	448.65	319.29	660.72	778.42	271.67	293.36	293.75	166.22	302.78	277.51	431.4	246.35	193.1	318.41	315.33	503.64	351.65	365.03	144.78	211.81	-0.52813			OSCP
TdChr004.605	741.97	581.34	461.78	384.42	423.3	328.63	311.76	288.58	195.41	446.89	117.56	330.84	554.95	388.22	432.58	232.82	318.43	457.45	387.57	88.09	384.47	1.02	210.94	-0.967873			Profilin
TdChr002.1200	826.44	379.95	442.5	455.22	166.03	137.65	553.35	836.7	150.55	889.32	97.19	112.67	150.45	399.75	164.9	237.47	165.58	178.19	103.65	1346.41	59.67	262.08	210.42	0.000335053			Armet
TdChr006.829	96.82	295.23	35.71	1.93	6.06	61.36	82.9	45.69	69.33	40.9	20.57	83.83	23.7	52.29	38.18	23.26	96.98	19.68	30.5	48.75	22.61	0.21	210.29	3.18112			PMSR
TdChr005.1748	0.35	1.5	0.81	0.81	0.19	0	0.07	0.03	0.03	0.06	0	0.18	0.2	0	0	0	0.07	0	0.37	0.12	0	0.04	209.24	558.053			NF
TdChr003.608	205.59	270.65	840.62	571.72	559.05	526.18	643.47	523.34	409.14	617.99	379.58	763.47	438.81	570.9	460.08	501.61	486.17	368.3	502.45	555.66	482.81	0	208.46	-1.7166			Dynein_light
TdChr003.125	0	5.06	0.95	0	0	0	0	0	0	0	0	0	0	0	0	0	0	1.66	0	0	0	0	207.61	2077.1			NF
TdChr005.410	0.57	5.46	1.04	5.14	0.11	0	0	0	0	0	0	0.82	0	0	0.12	0.1	0	0.28	0	0	0.85	0	207.27	260.843			NF
TdChr003.1696	63.51	38.55	166.59	305.22	142.08	101.06	149.77	156.25	124.35	51.54	40.32	106.11	21.22	43.05	33.93	13.72	19.09	5.98	25.12	112.11	1.01	74.7	205.32	1.36728			-
TdChr001.150	3.2	107.17	2.72	41.36	7.79	0	0.04	0.23	0	0	0	0.12	0	0.09	0	0	0.28	0	0.08	0.11	0.31	0.86	204.57	108.233			NF
TdChr002.443	75.57	107.56	406.31	368.38	166.31	639.63	944.71	342.85	452.09	295.51	100.61	188.48	230.75	394.68	180.63	126.83	257.78	235.97	455.32	393.09	672.34	1.5	204.53	-0.234012			Ras
TdChr006.1023	10.44	221.56	16.99	44.18	9.16	0	12.42	22.38	150.65	9.09	94.6	60.49	65.79	39.73	413.79	77.41	50.91	57.72	66.05	10.2	201.31	10.38	202.77	2.03495			Ctr
TdChr002.677	679.64	645.29	561.07	663.95	323.53	363.84	1045.48	463.99	979.74	350.01	217.73	869.03	601.22	1220.91	428.9	330.17	866.74	605.52	1765.67	325.8	581.36	27.64	202.54	-0.874238			Enolase_C,Enolase_N
TdChr005.1157	1056.42	354.15	428.6	432.33	279.1	116.9	280.74	402.29	64.7	476.79	78.65	91.87	83.27	188.13	86.88	98.25	81.83	59.01	44.14	327.45	63.15	114.74	202.53	0.331837			Ribophorin_II
TdChr006.2051	798.95	122.69	383.99	208.58	148.85	208.18	418.35	678.02	86.31	901.41	105.16	127.02	197.01	386.03	158.56	168.55	147.81	139.52	104.26	330.78	98.2	1.55	202.09	0.144607			CDV3
TdChr005.1262	427.87	470.93	531.96	429.39	440.78	306.08	396.88	403.77	330.75	467.16	147.11	480.72	320.73	393.04	334.94	208.31	477.05	344.3	464.78	388.61	548.76	483.79	201.77	-1.48129			eIF-1a
TdChr005.1107	35.9	17.67	131.69	131.2	234.33	68.68	213.11	169.22	35.82	500.04	140.22	126.94	41.63	191.87	89.96	286.04	121.65	69.6	173.46	0	116.2	0	201.57	0.585612			Yos1
TdChr001.3437	19.1	63.31	236.49	725.47	295.15	225.04	302.02	141.66	589.72	81.13	466.12	490.35	1216.47	430.36	1148.32	754.01	340.77	838.9	404.29	33.75	766.71	7.59	200.29	-0.28842			Catalase,Catalase-rel
TdChr004.1848	0	13.87	106.21	134.54	352.98	45.97	108.58	74.08	501.63	116.14	0	0	2.02	134.41	4553.55	1.31	0	0.89	1.74	13.05	25.15	0	198.57	1.39626			NF
TdChr002.2776	501.67	334.69	242.18	563.82	115.87	91.78	150.51	207.82	53.54	246.61	67.86	84.2	101.23	125.45	115.06	107.89	107.85	106.59	79.38	290.94	110.84	67.98	195	0.622419			HyaE,Thioredoxin,Thioredoxin_6
TdChr005.1734	592.34	289.27	119.33	271.94	83.53	38.79	97.23	126.53	68.34	117.97	25.75	48.56	43.91	57.65	55.54	33.54	39.32	33.9	36.55	141.11	13.87	3.7	194.87	1.60872			Lectin_leg-like
TdChr002.096	79.11	90.38	56.65	72.87	47.71	29.53	79.12	78.75	164.31	57.04	63.92	151.49	226.42	96.15	83.01	44.76	90.65	169.51	261.33	32.66	24.22	0.05	194.63	1.61165			EF-hand_1,EF-hand_5,EF-hand_8,Mito_carr
TdChr005.1765	61.36	51.15	55.32	45.84	41.18	22.99	67.72	98.66	41.63	120.02	29.17	66.59	35.04	59.76	34.09	35.34	37.31	20.23	26.89	107.1	12.65	0.65	192.69	4.65896			CDP-OH_P_transf
TdChr004.1773	20.63	896.86	72.84	148.71	963.18	207.59	481.95	472.18	885.71	378.95	812.25	1376.13	1035.39	669.55	1951.99	1262.72	1536.8	1332.74	1044.86	388.29	1813.37	36.34	192.37	-0.720155			Phospho_p8
TdChr001.2942	277.15	238.54	223.71	384.26	184.42	193.59	167.82	123.89	295.71	67.82	94.32	205.39	257.86	196.91	96.2	52.04	72.38	116.23	242.03	42.2	74.73	24.43	190.86	0.0445808			Reticulon
TdChr001.2394	9.67	1108.35	7.41	0.11	0	0	0	0	0	0	0	0.08	0	0	0	0	0	0	0	0	0	0	190.59	1362.07			NF
TdChr005.1307	384.14	1155.48	1354.45	521.78	277.26	197.64	557.51	835.58	52.82	880.33	60.07	102.78	132.83	329.69	89.12	77.73	99.82	77.13	53.76	1098.73	129.68	32.15	190.54	0.000219144			NAC
TdChr002.1405	49.6	191.53	39.2	37	23.09	5.4	27.86	42.75	2.9	67.93	0.78	0.69	5.67	21.14	1.19	0.67	0.42	5.67	0.09	66.91	2.98	0	189.14	4.57895			DAGAT
TdChr001.2371	59.45	292.09	103.02	163.7	593.14	148.45	106.97	81.48	329.31	50.7	185.36	428.7	232.73	349.46	360.73	1595.28	451.12	263.41	528.27	62.02	611.49	59.38	189.04	-0.150404			GSHPx
TdChr001.619	96.25	70.36	0.42	0.22	0	2.37	40.02	54.64	0.13	86.6	1.3	0.67	6.26	26.05	0.1	0.77	0.94	2.33	0.07	102.99	3.69	5.82	186.79	3.93559			Peptidase_M13,Peptidase_M13_N
TdChr001.2954	8.28	478.92	1.49	0.06	0.3	0.16	0.36	0.04	0.11	0.04	0.14	0.06	0.34	0	0	0.06	0.05	0.24	0.04	0.18	0	0	186.28	490.184			NF
TdChr001.2213	836.84	970.5	248.5	261.01	228.07	201.8	224.4	213.58	184.47	243.23	190.17	208.9	196.43	208.5	211.49	229.43	227.28	228.27	182.5	420.5	422.59	469.88	186.19	-0.824666			SPC25
TdChr006.1039	291.95	235.73	136.64	126.93	64.03	17.79	61.44	83.16	71.06	101.29	24.75	38.66	44.58	54.24	86.68	46.31	35.15	37.29	23.75	136.21	60.52	0.37	183.71	1.60517			NF
TdChr003.1466	810.77	916.42	644.57	408.98	336.04	224.33	323.4	352.74	179.88	490.63	132.76	184.99	145.24	237.15	382.25	225.73	240.87	141.49	98.6	372.19	195.57	82.71	183.36	-0.274348			Proteasome,Proteasome_A_N
TdChr001.1031	0.08	1.5	1.06	1.99	30.67	87.23	163.23	70.25	443.39	21.63	490.15	167.02	737.98	252	618.73	300.55	100.1	350.44	200.81	3.04	385.39	0	183.24	0.0641959			COesterase
TdChr001.2965	724.67	190.21	140.5	182.35	103.21	67.99	184.74	235.56	273.85	275.31	73.19	648.71	109.73	133.3	149.22	90.2	817.55	95.94	69.56	270.94	105.84	8.65	183.05	0.220647			Inositol_P
TdChr002.3112	1019.88	369.73	257.24	309.53	184.89	107.25	220.67	271.65	133.92	301.73	98.71	111.32	129.5	137.78	145.97	131.77	99.94	138.2	81.8	232.34	82.81	41.4	183.02	0.331256			ER_lumen_recept
TdChr006.810	601.76	513.94	355.51	242.38	154.34	123.82	207.55	250.15	46.33	289.79	49.83	62.93	74.55	152.28	80.94	66.69	73.44	67.93	68.06	304.72	93.25	3.14	182.84	0.331446			eIF-5_eIF-2B
TdChr005.1054	6.95	142.27	7.43	197.74	140.53	74.81	94.91	16.49	117.88	12.53	0.7	104.27	18.45	31.32	235.81	1.35	148.37	14.44	69.15	9.01	23.08	0	182.26	1.27422			ACT,Biopterin_H
TdChr006.956	1203.24	1046.25	1092.3	698.56	860.07	344.37	443.97	477.35	147.72	312.3	172.09	489.21	222.25	234.81	96.05	146.01	297.1	131.72	176.11	468.98	182.45	12.93	181.27	-0.374192			NF
TdChr003.911	77.53	143.13	91.65	55.92	134.99	38.98	123.85	218.33	52.54	284.26	23.82	42.02	58.42	133.8	44.57	30.71	35.39	48.1	51.04	177.18	74.98	0.2	181.09	1.34616			Ldh_1_C,Ldh_1_N
TdChr004.1456	43.82	651	531.47	411.11	137.19	99.25	122.95	134.13	118.58	155.08	158.74	160.58	254.38	123.52	106.6	118.77	141.65	207.29	99.3	152.01	166.62	245.08	180.57	0.391691			Aldo_ket_red
TdChr002.114	627.01	290.72	206.94	280.45	101.57	65.97	146.14	136.55	143.63	157.38	204.21	185.34	187.56	186.87	146.66	414	183.08	199.88	148.49	149.04	149.68	335.24	180.55	-0.0418244			EMP24_GP25L,TIR_2
TdChr002.2242	529.78	369.95	573.67	353.67	220.07	181.28	298.5	354.78	60.74	505.74	82.76	129.04	134.79	240.09	85.98	79.16	94.75	96.17	106.15	498.81	68.32	3.9	180.49	0.000378845			Peptidase_M24
TdChr001.2808	0	17.48	3.58	0	0	0	0	0	0	0	0	0	0	0.11	0	0	0	0	0	0	0	0	180.28	1803.8			CLIP,Trypsin
TdChr002.2360	10.01	10.46	233.32	443.29	74.6	18.11	17.25	7.78	19.79	7.82	1.32	17.66	4.04	7.45	29.44	1.37	30.59	3.27	15.36	6.2	3.8	0	180.08	8.66139			Amidohydro_1
TdChr006.1549	0.33	41.12	1.04	1.44	0.18	0	0.04	0	0	0	0	0	0	0	0	0	0	0	0	0	0	0	178.95	852.619			NF
TdChr004.2260	607.33	402.86	213.7	246.12	136.79	88.7	122.94	122.11	73.46	124	92.62	92.49	86.45	82.2	111.98	120.05	107.38	91.55	61.39	163.77	115.91	55.44	178.94	1.04771			SPC22
TdChr005.1265	622.38	435.61	708.24	474.29	412.99	280.82	562.09	625.12	297.81	712.16	146.22	413.25	367.65	516.22	271.78	206.34	383.01	334.95	362.58	497.06	444.81	37.45	177.41	-1.08304			W2
TdChr003.2271	126.39	171.31	48.31	107.16	199.88	66.12	126.91	193.42	351.15	192.5	240.15	330.86	311.86	236.04	277.59	292.95	240.81	277.43	235.24	162.75	106.08	2.66	176.89	-0.123935			CTP_transf_like
TdChr005.1438	873.92	552.75	558.23	443.59	1016.19	621.23	1147.96	1735.74	353.89	1816.44	260.1	927.98	626.53	957.48	263.47	262.66	623.22	407.91	472.92	1261.93	289.17	1.51	176.2	-0.614727			BTB,HTH_psq,zf-C2H2,zf-H2C2_5
TdChr003.1915	0	0.72	8.36	15.43	7.55	2.94	3.33	1.45	20.5	0	0.1	0	0.31	12.63	1.87	0	1.15	0.73	56.39	0	0.18	0.48	175.32	22.0177			MRJP
TdChr002.263	38.62	68.94	79.05	109.15	540.67	308.88	282.24	250.43	1241.87	77.16	123.82	502.27	350.82	381.31	385.47	188.65	425.13	277.03	499.57	97.35	207.49	0.78	174.78	-0.26959			-
TdChr005.1834	479.74	171.24	36.04	80.89	89.85	38.08	101.77	133.17	111.63	206.73	13.28	119.21	46.55	102.03	136	24.49	128.42	36.36	39.78	168.32	66.38	64.46	173.97	0.789991			NF
TdChr003.954	2847.15	1220.25	1245.03	889.46	683.71	277.98	693.02	1003.09	156.52	1014.5	124.34	267.6	241.4	477.16	233.54	137.34	132.25	127.48	103.74	869.58	153.93	11.01	173.85	-0.127591			DUF4775
TdChr001.2543	0.06	8.07	1.25	49.23	8.57	0.26	0.23	0.1	0.31	0.11	3.55	0.17	2.04	0.33	0.15	6.01	0.16	1.7	0.37	0.03	0.05	0	173.8	62.7812			Ald_Xan_dh_C,Ald_Xan_dh_C2,CO_deh_flav_C,FAD_binding_5,Fer2,Fer2_2
TdChr002.2303	499.99	321.21	299.06	308.72	179.86	76.38	144.14	200.81	46.27	254.08	67.35	106.15	80.66	116.29	87.56	88.2	107.3	68.94	51.28	250.34	76.29	16.28	173.47	0.443753			DDOST_48kD
TdChr006.1329	136.67	390.2	369.91	334.9	217.03	272.26	150.15	106.12	128.22	215.16	133.81	173.96	125.03	147.42	158.58	143.85	148.38	123.3	163.4	76.66	112.79	324.01	173.11	0.270721			Romo1
TdChr001.1061	476.49	541	599.3	298.61	186.44	198.83	253.86	401.01	68.72	395.2	48.85	104.02	93.22	197.47	91.77	53.64	82.88	59.48	85.08	364.29	52.29	1.12	172.53	0.000391007			HSP70
TdChr005.1448	301.56	345.7	894.1	536.19	555.48	278.36	351.02	501.28	172.93	565.43	245.9	700.81	246.54	326.86	194.01	294.2	483.52	190.51	199.74	599.73	281.47	2.75	172.42	-0.435924			-
TdChr005.1129	1.26	46.35	36.26	81.2	6.77	4	4.53	5.29	45.53	0.74	3.65	10.7	10.76	8.64	15.03	166.5	20.72	8.24	21.83	0.5	4.51	0	172.04	6.5689			Ldl_recept_a,Sushi,Trypsin
TdChr006.296	37.57	140.31	77.02	88.89	85.33	37.59	84.85	111.59	118.41	111.67	165.19	135.86	82.48	76.93	82.74	333.55	169.44	76.5	47.59	114.31	78.05	0.25	171.9	1.72443			TMEM18
TdChr003.1659	530.23	585.28	860.45	457.49	366.39	389.43	465.98	533.03	171.04	590.66	96.49	291.91	215.66	322.45	188.56	158.52	326.54	167.59	177.47	719	258.74	4.72	171.83	-0.465207			MAS20
TdChr006.436	0	2.66	1.82	66	54.83	2.07	8.54	5.17	22.16	0.05	4.61	12.21	13.9	3.21	4.16	7.32	6.47	10.98	5.22	0.04	29.56	0	171.8	15.4476			CBM_14
TdChr002.2119	355.88	232.52	357.55	399.56	219.94	94.53	192.38	242.4	100.46	185.01	118.95	85.31	85.23	93.07	91.43	134.27	103.28	91.83	68.49	274.13	137.96	6.16	171.79	0.280998			Peptidase_S24
TdChr002.2442	811.37	490.84	304.54	318.36	241.58	98.67	231.89	283.17	276.47	235.36	94.94	153.47	163.58	222.24	223.68	135.66	149.77	153.49	263.62	236.45	175.65	28.14	171.37	-0.447521			Arf
TdChr005.257	790.27	504.37	652.93	347.46	406.87	288.52	427.84	560.38	136.08	800.08	102.35	277.98	220.76	373.99	243.21	176.94	339.31	171.94	183.83	503.03	155.66	4.8	171.14	-0.402893			UQ_con
TdChr006.2036	312.49	168.58	106.11	96.56	33.04	43.53	66.17	54.1	45.71	71.36	58.69	80.86	66.62	63.72	76.95	123.62	90.33	74.5	46.56	74.9	50.45	62.6	170.47	2.67052			PQ-loop
TdChr002.2314	476.87	623.5	285.58	236.82	180.14	573.43	465.63	177.27	220.23	319.75	262.61	377.75	329.65	370.48	329.57	373.57	490.85	389.52	368.6	251.31	241.98	74.09	170.22	-1.10334			NDUF_B5
TdChr005.1152	680.12	586.01	447.76	360.73	225.5	501.73	774.47	353.79	259.38	416.55	91.53	208.03	165.41	308.27	144.24	104.65	230.05	150.14	322.82	346.66	187.97	9.68	169.27	-0.406549			Peptidase_M16,Peptidase_M16_C
TdChr006.1017	1268.96	776.88	455.52	346.78	199.93	160.91	473.01	637.23	112.67	735.28	79.27	159.98	226.16	412.09	132.3	115.49	169.16	169.89	161.5	1002.89	217.32	32.23	168.81	-0.102066			PP28
TdChr004.1222	1104.84	1001.33	437.49	327.53	289.35	219.57	303.32	348.96	240.11	462.83	178.29	225.31	180.6	232.26	398.52	268.6	279.7	224.42	169.9	327.17	274.95	34.36	168.68	-0.912505			Proteasome,Proteasome_A_N
TdChr006.541	2648.85	978.64	1110.48	633.54	696.51	464.73	863.44	928.79	143.1	885.68	191.23	402.33	335.69	455.81	222.26	165.84	212.77	147.25	175.56	557.81	106.44	14.3	168.27	-0.384701			RRM_1
TdChr002.2748	7.49	218.91	48.63	45.64	234.6	19.1	105.26	113.22	835.37	33.38	24.74	739.82	150.65	228.22	798.71	18.14	559.32	115.56	257.34	8.63	130.97	0.87	168.2	0.260509			ADH_N,ADH_zinc_N
TdChr005.1127	524.39	527.06	421.4	285.09	248.96	178.37	229.09	265.82	155.31	405.15	153.51	174.17	195.18	234.82	410.22	278.3	224.22	189.96	103.57	269.79	224.06	147.8	167.79	-0.579957			Proteasome,Proteasome_A_N
TdChr003.175	2257.76	1465.83	686.61	505.49	466.45	316.52	594.76	720.8	482.96	568.31	231.59	383.5	457.78	717.22	323.02	316.42	409.98	428.82	850.76	583.97	478.39	5.98	167.45	-1.08109			SUI1
TdChr006.118	159.49	380.34	413.56	286.37	171.88	438.25	616.77	228.26	193.54	253.98	53.74	169.43	123.52	181.58	106.53	86.58	148.49	152.12	213.12	314.01	198.09	0	167.24	-0.118696			ATP-synt_DE_N
TdChr006.653	389.99	348.02	540.75	327.18	252.3	130.75	241.91	285.27	72.08	427.38	48.51	147.63	129.1	253.49	114.69	78.6	151.36	94.67	167.96	422.03	152.31	20.34	166.55	0.000542211			Rotamase,WW
TdChr003.2403	187.9	488.36	149.14	234.21	255.07	108.69	137.63	100.32	337.43	101.99	309.28	338.77	215.42	195.18	444.52	578.91	247.4	195.79	184.31	104.46	470.02	1.32	166.13	-0.164158			GSHPx
TdChr001.295	0.78	111.49	13.31	18.07	1.52	6.35	2.21	0.36	0.76	0.47	0.67	2.49	0.52	39.51	0.82	2.27	1.99	1.85	47.22	0.21	2.39	0	165.2	17.7222			NF
TdChr002.2438	506.83	710.61	265.77	375.38	214.05	108.15	204.65	205.92	253.37	201.45	209.03	322.6	220.48	174.08	228.35	160.54	299.81	209.06	152.69	166.84	187.66	12.94	165.09	-0.491425			Perilipin
TdChr005.2142	30.64	478.72	278.76	283.7	120.31	40.78	56.54	57.92	45.04	64.84	38.66	79.88	160.18	49.1	103.56	22.47	58.45	108.48	36.65	47.24	46.96	3.1	163.83	1.4809			adh_short_C2
TdChr006.1005	2.7	135.25	2.33	0.05	0.07	0.97	0.03	0.03	0.19	0	0	0	0.21	0.05	0.21	0	0	0	0.24	0	0	0	163.48	503.169			NF
TdChr001.2580	49.16	145.49	289.57	234.22	150.47	403.35	489.77	140.81	207.61	164.1	94.43	212.53	180.26	277.31	109.52	106.4	214.75	219.45	270.99	199.67	438.17	10.31	162.73	-0.336269			ATP-synt_F6
TdChr004.1775	0.22	9.85	16.41	23.95	4.01	13.65	7.38	4.1	25.15	4.14	10.36	4.37	11.77	8.85	98.73	7.7	4.01	9.3	5.13	1.81	6.86	36.66	162.31	14.1205			COesterase
TdChr005.2150	6.84	709.91	1.51	0	0	0	0	0	0	0	0	0	0.08	0.08	0	0	0	0.08	0	0	0	0	161.81	899.5			NF
TdChr002.2437	7.73	112.16	25.2	41.74	54.58	82.93	50.67	61.35	50.21	58.32	42.76	29.44	11.32	22.84	35.27	58.73	21.14	9.85	8.83	72.78	25.79	0	161.49	3.27146			Perilipin
TdChr002.1352	228.59	310.93	545.1	594	414.4	658.47	751.92	530.7	734.79	712.7	643.67	1100	1067.1	1045.13	665.55	823.41	1184.61	1077.08	1116.63	650.29	893.23	2.76	161.46	-1.16832			V-ATPase_G
TdChr005.1374	0.4	27.05	67.48	79.47	0.85	1.1	13.2	14.92	86.81	0.86	0.49	167.36	16.06	48.19	9.56	1.97	127.47	5.32	73.15	0.28	14.38	0	160.51	2.106			Metallophos
TdChr005.1691	0.76	45.32	0.65	0.02	0.09	0.03	0.07	0.05	0.05	0	0.02	0.1	0.02	0.02	0	0	0.03	0.05	0.07	0.02	0	0	160.41	1003			NF
TdChr001.2758	36.55	401.02	77.41	429.59	2025.95	1287.6	460.54	277.25	2178.56	50.91	536.78	3766.44	1954.08	2255.33	1565.78	677.9	2501.12	1540.84	3246.25	47.56	1297.94	375.3	159.27	-0.311647			NF
TdChr006.724	2114.64	2975.8	429.78	282.01	234.68	321.78	391.62	252.95	522.62	272.36	331.21	660.97	740.96	625.77	666.14	567.43	851.75	919.14	947.59	189.67	569.89	267.81	159.23	-0.851864			CHCH
TdChr003.146	3.23	180.44	1.99	0.34	0	0	7.65	1.21	5.74	0.44	0	1.99	7.94	2.37	0.94	3.06	1.5	9.3	14.27	0.96	2.41	0	157.8	25.5381			Phospholip_A2_2
TdChr001.2367	0.18	10.42	0.24	0.59	0.1	0	0.03	0.18	0	0	0.09	0.19	0.07	0	0	0	0	0.06	0	0.17	0.08	0	157.59	562.929			LPMO_10
TdChr001.3044	506.11	315.75	246.59	188.1	121.58	59.82	180.07	197.62	35.5	230.91	23.19	34.96	35.81	69.15	36.12	26.83	47.78	39.51	23.58	319.25	53.87	47.72	156.77	0.618173			SRP14
TdChr003.069	317.59	330.88	284.82	312.67	158.08	144.97	258.82	205.95	361.89	236.96	128.12	483.98	348.75	229.35	329.19	160.5	441.57	362.76	207.15	185.18	377.03	10.12	156.63	-0.611043			Ldh_1_C,Ldh_1_N
TdChr001.3441	115.5	67.78	47.21	56.19	142.07	71.93	193.18	176.73	269.82	194.06	79.81	166.78	278.47	190.27	148.86	50.22	121.89	299.86	160.9	202.61	245.35	2.67	156.46	0.000848536			Str_synth
TdChr005.229	5.24	278.75	174.65	94.58	36.56	20.03	40.28	24.76	139.21	10.13	53.75	166.75	96.37	76.82	201.77	110.87	274.35	164.78	165.82	5.88	155.25	0.29	156.14	0.444337			NF
TdChr005.1822	0.64	0.79	40.81	47.17	20.74	12.89	8.29	7.36	40.89	3.24	13.65	34.75	17.88	10.95	43.14	15.96	32.54	18.98	13.2	2.33	10.72	0.25	155.72	5.48495			Hydant_A_N,Hydantoinase_A,Hydantoinase_B
TdChr001.852	0	0.6	1.05	53.82	64.53	28.25	86.76	9.09	53.49	3.43	46.48	72.7	78.58	56.57	56.93	22.51	46.63	59.96	68.97	0.46	13.89	0	155.39	1.94098			p450
TdChr005.194	129.38	41.03	64.16	102.95	62.25	57.01	120.58	187.64	64.74	200.43	53.69	41.69	79.13	104.17	73.49	78.52	36.34	60.41	49.81	93.39	39.34	2.75	155.26	1.74571			DnaJ,TPR_1,TPR_11,TPR_16,TPR_19,TPR_2,TPR_8
TdChr002.1348	137.28	180.58	215.38	170.01	77.27	40.41	127.95	211.16	20.64	239.62	18.56	35.33	35.23	89.23	32.98	25.11	34.73	23.5	17.1	233.37	43.65	6.78	155.16	0.835154			tRNA-synt_1b,tRNA_bind
TdChr004.601	435.92	339.55	409.09	323.78	223.22	579.99	895.79	321.73	501.97	305.4	258.2	657.23	726.4	2015.94	441.55	326.12	717.68	908.95	3049.37	237.83	1030.37	38.67	154.22	-0.689225			Rieske,UCR_TM,Ubiq-Cytc-red_N
TdChr006.805	320.73	303.52	561.97	359.46	501.25	347.01	655.54	977.23	217.41	1974.39	253.5	577.19	553.47	960	557.98	405.98	636.42	510.71	662.54	1411.3	519.6	100.55	153.54	-1.17216			zf-rbx1
TdChr005.1829	0.29	2.39	0.64	4.08	1.01	6.99	33.44	46.02	296.95	12.96	77.03	552.98	142.94	177.35	300.02	37.72	478.85	97.13	273.57	3.04	279.29	7.33	153.51	0.48899			COesterase
TdChr001.2636	566.79	669.18	507.39	400.6	338.76	735.04	1055.72	409.86	382.98	378.76	139.52	215.53	293.81	314.76	251.24	181.69	310.08	276.04	364.69	414.36	378.14	0	152.82	-1.42539			COX5A
TdChr006.482	1131.21	778.07	661.65	564.24	1099.68	1086.41	516.18	624.32	332.91	780.75	440.5	794.98	706.04	547.14	623.22	685.58	1158.43	731.97	557.57	992.7	545.59	0	151.95	-2.10927			Histone
TdChr004.837	712.39	524.12	674.56	524.87	542.65	187.92	613.23	1021.11	186.06	774.61	98.52	109.51	205.51	323.06	293.28	159.34	215.32	173.46	241.53	1397.47	438.73	0	151.74	-0.355127			ubiquitin
TdChr002.1339	174.79	537.83	212.06	236.05	158.69	139.44	137.6	70.72	168.55	78.58	62.57	161.72	101.94	165	196.89	71.13	179.69	104.93	208.11	74.24	117.24	8.91	151.42	0.00114837			ETF,ETF_alpha
TdChr004.124	29.7	37.88	46.87	39.7	78.79	76.5	39.49	49.53	42.54	55.38	16.43	54.34	29.68	38.53	60.31	16.51	30.09	19.08	29.34	13.32	19.48	0	151.29	4.08543			Glycos_transf_2,Ricin_B_lectin
TdChr005.1756	451.02	314.01	150.86	242.44	242.03	386.74	466.47	254.46	710.96	193.75	742.6	911.96	1514.72	870	1086.31	1105.04	1035.36	1798.87	1741.88	98.41	1419.02	0	151.1	-0.385086			Bax1-I
TdChr006.293	10.41	57.17	44.3	194.22	65.53	97.33	357.05	144.21	937.04	47.46	841.2	655.65	1166.31	417.12	565.37	1068.89	626.9	1344.83	573.85	40.84	831.84	1.92	151	-0.30176			CRAL_TRIO
TdChr006.1810	649.54	803.98	360.57	346.6	200.67	421.45	999.02	377.5	660.3	199.65	173.44	299.85	396.6	1248.19	220.74	195.93	371.82	464.48	1765.25	343.35	928.96	282.51	150.86	-0.547503			UCR_14kD
TdChr001.666	176.77	703.58	831.58	599.27	426.27	123.99	207.88	147.43	210.78	106.69	92.02	166.71	114.33	100.78	286.65	151.66	174.06	103.68	84.91	127.91	149.31	1.78	150.23	0.00101092			adh_short
TdChr006.038	164.54	241.92	155.69	121.27	167.39	91.09	102.49	136.73	99.81	103.21	131.84	62.86	168.23	93.19	70.53	57.22	47.43	112.5	80.37	40.17	86.32	0.62	149.77	0.697791			EBP50_C,PDZ
TdChr005.640	200.25	232.18	216.95	182.24	83.02	69.2	118.35	157.88	46.67	156.98	24.52	35.2	34.48	69.42	42.77	19.67	25.83	18.47	22.78	133.74	20.81	3.15	149.43	0.626941			TPR_1,TPR_16,TPR_2,TPR_8
TdChr002.1246	155	464.5	202.71	225.63	160.73	256.43	148.07	64.37	75.76	62.02	35.56	87.95	45.9	62.16	66.53	41.44	87.44	45.07	51.59	95.39	81.2	22.33	149.34	0.714817			Sod_Fe_C,Sod_Fe_N
TdChr002.2366	382.02	430.75	487.74	282.09	137.12	286.65	295.63	313.04	95.98	621.36	112.12	238.05	208.94	383.13	235.29	169.32	296.99	193.65	122.19	552.44	201.39	22.57	148.84	-0.472607			-
TdChr003.1354	172.66	288.69	192.73	234.72	246.43	150.2	166.38	145.21	176.57	144.02	95.64	268.15	141.13	183.72	168.89	125.19	289.32	153.17	238.12	111.69	157.77	26.4	148.59	-0.255599			GDI
TdChr001.908	0	4.09	2.74	12.41	0	4.66	9.34	5.89	40.45	1.86	1.88	10.31	62.16	83.82	78.07	268.3	31.23	238.88	125.78	0.11	31.71	0	148.18	2.03181			adh_short
TdChr005.280	717.08	1128.94	522.57	469.99	349.67	929.76	1177.88	394.18	472.03	296.65	192.99	370.15	368.46	804.57	239.42	231.71	588.31	605.87	980.96	551.2	406.7	0	147.73	-0.951967			COX6C
TdChr006.985	236.39	172.77	251.98	194.61	115.06	123.62	151.15	172.85	40.17	264.98	59.34	59.3	73.88	120.07	79.89	84.24	96	87.16	61.02	307.96	86.59	0.94	147.15	0.335225			SRP19
TdChr006.691	141.55	313.82	555.34	636.55	110.58	103.99	387.23	561.8	161.83	640.9	91.27	333.59	106.2	279.91	317.26	73.98	294.1	52.46	128.9	499.63	140.9	0.15	147.09	-0.0580676			Transket_pyr,Transketolase_C,Transketolase_N
TdChr005.731	0	3.8	0.57	7.38	2.38	0.69	0.34	0.36	1.92	0.17	0.08	0	0	0.06	3.79	0	0	0	0.06	0.12	0	0	146.73	104.42			MFS_1,Sugar_tr
TdChr002.2517	195.53	11.9	23.02	19.47	56.04	41.48	155.43	173.09	75.22	146.87	22.09	40.71	217.84	124.42	5.1	7.23	21.07	95.97	68.85	50.34	51.46	0	145.45	0.829316			Pro_dh
TdChr003.473	0	0.67	0	0	0	0	0.26	0	0.53	0	0	0	0	0	0.82	0	0	0	0	0	604.17	0.68	145.35	293.838			NF
TdChr002.3331	224.75	176.83	84.61	226.68	236	180.62	172.39	183.6	112.41	182.91	286.15	265.76	105.73	142.52	225.24	131.22	294.8	99.79	139.02	85.74	78.62	19.57	145.19	-0.23357			EF-hand_7
TdChr002.2066	0.49	21.07	15.86	56.3	57.54	10.59	7.69	1.24	10.29	0.38	5.42	3.06	10.77	3.43	7.29	9.48	4.13	11.61	4.21	1.3	6.53	0.03	144.66	17.0876			MFS_1,Sugar_tr
TdChr004.471	68.76	31.04	280.82	168.59	247.47	210.49	542.57	845.74	110.84	605.27	41.92	69.29	91.85	268.51	46.09	24.05	29.09	31.91	61.81	201.93	23.05	0.09	144.44	0.274191			MA3,MIF4G,W2
TdChr002.2284	377	181.28	106.82	169.93	41.87	46.68	77.65	104.53	45.83	132.51	74.09	53.33	49.7	70.25	56.71	58.27	61.57	53.66	43.27	120.51	48.44	13.89	144.36	1.28124			DnaJ,Myb_DNA-binding
TdChr003.565	12.43	77.49	455.12	557.44	112.34	76	167.46	76.08	211.89	56.39	23.42	232.79	71.68	105.64	311.64	32.37	419.49	78.01	219.71	67.8	123.63	3.76	144.34	0.265463			GCV_H
TdChr001.3330	433.49	1042.36	320.37	372.63	255.21	167.81	217.92	117.26	299.73	93.05	108.92	231.23	209.68	165.5	280.46	136.17	241.9	207.04	225.27	97.77	325.72	40.21	144.27	-0.490415			ETF
TdChr005.1471	3.05	33.83	29.75	64.57	24.42	5.31	10.97	2.52	16.79	2.28	1.01	19.72	1.31	3.95	56.63	3.95	20.28	2.33	8.35	1.66	3.96	0.07	143.6	6.91086			DHDPS
TdChr001.791	35.33	116.68	83.79	72.76	203.78	52.8	42.03	36.08	120.34	22.86	46.97	92.65	62.81	57.21	160.08	56.31	92.58	62.15	76.28	14.51	35.63	0.8	143.26	1.51342			zf-LITAF-like
TdChr002.3073	17.62	96.75	13.75	16.72	17.2	32.65	110.78	120.86	37.14	125.81	5.91	78.75	17.47	53.91	2.25	5.9	39.73	9.47	16.46	139.57	1.57	0.15	142.95	1.6452			MFS_1,Sugar_tr
TdChr001.604	46.96	315.1	192.04	391.15	16.41	19.62	6.83	1.33	2.46	0.32	0.11	5.68	0.48	1.96	6.24	0.21	5.2	0.21	4.91	0.56	4.21	8.22	142.7	8.01398			NF
TdChr002.642	412.98	761.35	325.18	511.13	259.18	265.88	795.75	313.45	831.9	153.76	191.33	668.78	585.35	885.02	352.03	250.38	672.93	626.02	1181.17	184.83	868.43	89.02	142.47	-0.584721			TIM
TdChr006.904	2.35	54.19	34.26	80.2	133.91	58.05	98.02	28.74	197.34	3.02	31.66	178.83	141.57	97.67	70.05	39.22	117.95	115.15	150.55	1.52	72.87	0	141.4	0.737402			Biotin_carb_C,Biotin_carb_N,Biotin_lipoyl,CPSase_L_D2,HMGL-like,PYC_OADA
TdChr001.328	0	0.69	18.44	130.79	19.3	10.76	45.84	29.7	65.58	2.01	21.27	43.86	50.21	30.07	46.84	18.27	30.2	20.28	26.43	0	19.55	60.33	140.52	4.06587			adh_short
TdChr004.1353	1073.39	355.8	1054.28	636.46	833.47	337.56	857.7	1067.24	125.47	1075.07	141.36	374.88	270.75	463.13	185.91	146.25	217.97	145.75	180.94	865.64	112.74	0.42	140.44	-0.281584			RRM_1,zf-CCHC
TdChr001.2809	0.27	4.81	1.24	0	0	0	0	0	0	0	0	0	0	0	0	0	0	0	0	0	0	0	140.26	1403.6			CLIP,Trypsin
TdChr005.2164	2284.74	496.1	209.08	220.04	488.25	277.8	1590.06	2815.18	250.57	3771.22	163.86	487.8	569.23	1743.58	176.81	161.1	318.51	247.44	379.3	2902.56	119.72	2.85	139.52	-0.201725			PAM2
TdChr002.2944	0	27.91	3.23	0.1	0	0	0.07	0.04	0	0	0	0.05	0	0	0	0	0	0	0	0	0	0	138.94	958.897			NF
TdChr006.908	329.82	398.11	336.04	257.31	164.7	100.98	194.75	273.64	51.75	228.7	49.89	68.24	60	95.33	93.74	71.56	97.1	54.03	38.16	307.03	75.08	28.63	138.79	0.233483			Pyrophosphatase
TdChr004.1785	237.17	551.79	196.72	188.41	246.66	170.03	243.49	153.23	355.74	102.5	129.3	319.84	353.12	189.74	303.36	111.03	278.25	269.19	260.28	102.08	204.74	1.05	138.74	-0.515508			-
TdChr001.411	6.49	515.4	3.88	0.8	0.39	0	1	0	0.19	0	0	0	0	0	0	0	0	0	0	0.12	0	0	138.52	199.453			NF
TdChr004.650	3.48	194.27	22.25	2.63	0.74	5.65	72.48	85.7	385.82	9.87	11.72	0	2.01	1.96	1539.28	0.09	0.14	2.74	0	3.97	712.93	0	138.25	1.72636			p450
TdChr002.3636	2.1	68.68	61.63	97.23	61.31	28.56	122.24	56.43	407.28	20.41	109.44	344.34	388.28	242.49	507.15	146.23	361.15	354.84	345.81	5.14	551.85	23.8	137.83	0.0538149			ECH_1
TdChr001.234	11.92	88.46	30.07	53.62	24.87	1.89	3.27	1.53	6.44	0.96	0.71	2.62	1.36	1.24	6.05	0.82	2.56	1.01	1.41	0.79	1.58	0.05	137.58	16.6511			DUF1943,VWD,Vitellogenin_N
TdChr001.3014	0.16	0.9	0.33	24.15	3.89	11.09	29.96	13.56	83.98	0.73	16.41	110.4	74.4	49.56	53.8	11.88	127.75	135.08	76.96	0.23	12.58	0.04	137.25	1.64802			p450
TdChr001.2494	31.41	35.55	121.23	171.53	20.31	12.46	36.77	49.94	9.07	64.68	23.57	21.22	10.59	31.62	11.8	60.73	26.62	10.01	31.16	42.33	11.98	0.46	137.04	3.11568			AIRS,AIRS_C,Formyl_trans_N,GARS_A,GARS_C,GARS_N
TdChr005.092	2135.94	1309.62	1206.52	527.6	219.85	458.02	3755.97	1159.64	2322.9	547.18	176.57	720.6	1819.46	3964.89	301.02	246.85	1040.27	2274.86	5138.39	908.51	3922.82	0	136.79	-0.494737			Cytochrom_C
TdChr006.434	42.37	167.83	2.89	0	0.11	0.13	0	0	0	0	0	0.07	0.05	0	0	0	0.11	0	0	0	0	0	136.15	648.81			NF
TdChr001.1126	1425.33	689.9	1090.31	712.4	598.24	293.07	607.93	842.78	126.71	770.42	131.35	211.08	244.41	453.92	166.42	141.06	186.69	176.09	169.25	617.81	214.24	10.05	136	-0.222805			Chromo
TdChr004.1428	2.76	8.25	45.92	198.48	646.35	855.53	462.67	102.42	465.94	16.68	507.77	1875.1	694.45	884.03	625.25	602.7	1716.13	1535.73	1867.22	22.87	1103.1	0.67	135.54	-0.46767			Linker_histone
TdChr005.1272	6.62	152.72	100.27	121.16	80.08	101	38.5	10.46	55.49	4.86	1.97	113.65	2.43	25.36	3.23	2.35	119.79	1.68	40.36	5.65	1.04	0	135.38	1.12476			Aminotran_3
TdChr002.872	257.08	359.88	160.59	242.46	175.74	72.2	166.15	143.79	210.13	118.5	102.8	116.57	121.15	129.69	120.6	126.38	93.02	111.17	122.39	156.86	120.4	51.41	135.16	0.193317			Bap31
TdChr004.1443	478.19	277.18	106.97	137.19	113.88	75.03	134.7	187.49	79.14	222.17	81.14	82.1	74.44	95.24	93.24	102.21	79.65	69.64	54.35	216.96	91.25	1.88	134.1	0.687732			Longin,Synaptobrevin
TdChr005.1443	1.64	3.3	3.18	56.06	66.15	16.72	22.82	12.34	84.46	4.89	1.16	58.04	5.47	14.82	74.66	7.74	103.26	11.86	38.31	2.34	17.95	0	133.79	2.24427			MR_MLE_C,MR_MLE_N
TdChr002.2544	74.68	67.03	43.33	60.61	213.96	85.33	62.63	46.17	14.99	52.34	5.88	15.47	14.37	22.8	19.05	7.35	5.6	7.63	10.26	39.25	5.7	0	133.59	2.10118			Aminotran_3
TdChr006.395	24.25	1.93	0.47	0.76	0.09	4.88	36.07	62.97	0.46	95.71	1.12	0.7	6.89	30.09	1.06	0.52	0.07	0.83	0.58	104.13	1.77	0	133.33	4.95172			NF
TdChr004.1348	303.84	287.15	445.32	379.65	333.07	210.22	328.43	374.68	237	448.36	159.03	229.05	198.84	260.43	381.75	261.53	267.65	225.27	166.2	391.73	288.2	6.06	132.16	-0.993834			Proteasome
TdChr004.288	204.98	154.42	410.19	262.35	729.93	328.58	926.34	1320.5	962.52	1343.08	380.89	898.38	1521.36	1819.89	1483.97	479.52	933.42	1383.1	2766.24	346.16	2849.73	0	132.1	-0.746895			eIF_4EBP
TdChr006.1317	426.48	441.99	426.19	276.9	174.22	140.95	211.99	247.7	92.55	345.11	98.87	153.35	150.41	200.12	160.49	120.62	167.18	159.97	133.31	305.58	184.64	16.96	131.74	-0.282111			JAB,MitMem_reg
TdChr005.1110	3.29	94.27	281.55	208.24	59.56	11.12	24.96	25.49	180.76	10.74	111.63	34.11	169.88	78.15	431.25	300.22	84.3	108.06	132.61	2.66	103.92	0.51	131.66	0.297257			Lys
TdChr004.2016	31.57	680.65	132.85	258.93	861.55	476.03	221.84	64.14	124.06	49.51	72.62	63.89	39.68	48.99	120.21	29.25	66.44	39.93	47.83	54.75	104.64	11.07	131.14	0.774332			EF-hand_5,EF-hand_7
TdChr001.2429	13.65	20.24	1.67	2.74	0	0	0	0.04	0.16	0	0	1.59	0.15	0.07	0	0.05	5.29	0.14	0.07	0	0	0	130.92	75.6936			NF
TdChr002.505	746.54	311.52	252.28	252.38	393.07	242.7	255.1	264.38	233.6	290.07	192.53	290.32	269.63	227.06	298.61	267.39	332.56	266.45	223.41	183.61	211.09	5.41	130.84	-1.90839			Ras
TdChr003.1468	225.84	304.06	155.27	152.1	48.62	52.67	56.58	51.6	37.1	63.07	33.44	46.64	46.8	41.67	59.53	43.68	53.24	50.87	29.94	94.03	75.99	48.42	130.71	2.03543			Aldo_ket_red
TdChr004.2299	181.92	525.8	392.93	527.32	211.49	60.58	129.21	146.14	61.64	131.16	50.11	31.33	30.45	81.06	119.53	13.06	41	33.29	21.55	150.99	47.04	132.09	129.93	0.100339			DUF953
TdChr003.206	331.84	412.11	583.31	361.51	201.75	128.11	257.03	339.97	71.89	344.44	61.5	101.73	96.82	145.1	94.37	73.03	106.52	84.8	82.06	430.75	120.66	33.34	129.92	0.00775099			WD40
TdChr001.2440	17.81	207.5	33.65	1.85	0	0	0	0	0	0	0	0	0	0	0	0	0	0	0	0	0	0	129.6	1297			NF
TdChr001.3218	178.43	183.7	157.8	141.87	83.54	188.55	441.02	239.79	489.77	211.06	147.68	408.34	536.64	2624.6	289.99	168.1	450.52	578.91	4054.26	178.86	660.41	0.47	129.25	-0.265901			E1_dh
TdChr002.757	0.09	4.75	24.25	68.45	99.37	19.4	8.17	4.7	33.9	2.86	3.1	23.62	4.75	11.98	70.66	11.02	25.91	5.94	16.17	0.57	12.34	0	128.51	5.70178			UDPGT
TdChr001.999	7.17	32.84	36.42	159.58	302.49	109.03	104.03	60.28	365.54	11.34	201.33	286.4	242.98	150.88	384.14	336.57	238.71	265.51	221.41	10	466.58	7.95	128.51	-0.136009			ACBP
TdChr001.3400	529.27	526.19	404.58	269.06	259.39	157.82	233.1	262.78	145.66	294.76	95.75	196.34	155.66	178.22	224.64	150.15	227.81	152.41	127.24	279.19	162.12	20.29	127.68	-0.597525			AAA
TdChr005.654	480.43	397	479.03	329.26	302.65	176.12	314.68	359.85	202.84	408.98	124.02	165.13	155.74	201.19	334.71	199.81	212.01	148.41	107.34	368.45	195.31	28.02	127.66	-0.401615			Proteasome
TdChr001.3239	0.49	22.07	0.95	0.11	0.05	0	0	0.12	0.08	0	0	0.42	0	0	0	0	0	0	0.14	0	0	0.59	127.63	336.132			NF
TdChr002.1988	684.47	880.88	585.66	489.91	717.26	341.59	293.1	232.86	246.37	200.88	115.89	323.24	252.33	201.75	294.55	193.64	303.96	254.89	266.61	246.86	349.33	5.28	127.63	-1.08284			Ras
TdChr005.1791	57.04	98.79	257.5	195.61	164.61	373.43	481.48	212.74	329.25	242.74	107.03	299.85	296.52	1448.29	182.11	152.39	374.06	302.21	1605.42	254.11	738.79	26.74	127.18	-0.657355			zf-CHCC
TdChr006.872	929.15	273.68	271.14	171.98	306.77	189.34	177.88	206.74	134.38	233.82	20.7	114.49	146.56	122.01	102.74	26.43	109.01	115.93	90.36	63.04	107.88	0	127.02	0.00107724			ELFV_dehydrog,ELFV_dehydrog_N
TdChr002.1680	121.72	153.33	174.47	171.4	246.95	247.18	304.08	209.26	243.07	165.78	103.93	157.66	115.82	189.94	100.46	137.03	137.22	134.14	143.92	403.08	217.03	7.1	127	-0.36964			MRP-S35
TdChr006.2185	158.45	307.87	317.65	296.76	207.62	102.84	136.54	109.18	135.92	97.85	29.77	72.37	33.92	51.36	38.79	27.79	48.74	22.62	31.11	102.08	25.93	1.11	126.85	0.280306			3HCDH,3HCDH_N,ECH_1
TdChr005.777	3.73	117.22	39.65	52.92	12.91	3.54	7.93	6.42	16.47	7.09	4.99	22.18	9.89	9.63	37.59	8.1	38.64	16.32	14.86	6.34	4.26	0	126.69	4.95234			NF
TdChr001.851	0.82	59.01	1.68	53.37	4.94	8.56	10.76	3.01	27.31	0.95	1.62	9.78	7.1	11.05	25.5	4.35	15.94	12.05	34.97	0.06	13.15	0	126.32	6.3134			GMC_oxred_C,GMC_oxred_N
TdChr004.542	548.59	434.84	383.83	366.22	234.72	163.32	345.22	428.41	264.66	459.13	321.29	221.57	410.57	302.74	433.41	476.23	208.23	382.48	216.54	412.71	352.08	5.58	126.07	-1.17347			Pyr_redox_2,Pyr_redox_dim
TdChr005.853	108.88	138.82	236.84	387.08	327.87	214.35	517.47	427.74	786.2	212.74	234.65	389.65	298.21	257.05	327.03	380.04	491.5	369.78	347.7	385.76	641.22	13.94	125.78	-1.23191			UPF0184
TdChr001.448	200.31	500.36	191.64	177.43	140.41	220.74	234.29	93.69	79.56	99.25	27.74	88.41	78.52	98.76	67.77	34.03	87.24	70.31	92.39	101.59	94.72	1.25	125.56	0.386847			FumaraseC_C,Lyase_1
TdChr002.2258	71.59	46.05	71.52	80.88	123.69	44.92	147.19	127.49	627.45	37.58	81.55	92	119.23	63.62	216.89	86.69	45.07	74.5	88.77	45.87	50.31	0.31	125	0.602617			FAD_binding_1,Flavodoxin_1,NAD_binding_1
TdChr004.202	126.27	124.26	237.53	205.07	132.72	298.85	343.78	238.75	90.22	236.61	33.01	99.92	63.21	108.32	95.35	45.73	101.4	42.99	60.02	227.26	61.48	1.96	124.23	0.104015			PP-binding
TdChr003.2410	1311.63	492.15	376.33	274.28	208.1	112.28	299.9	534.21	52.67	716.86	53.13	102.23	104.47	269.45	86.15	66.26	100.65	57.27	48.7	629.79	71.48	11.8	124.06	0.044107			Thioredoxin
TdChr003.148	140.52	246.16	403.57	362.53	244.72	137.74	171.39	158.58	117.58	152.63	91.68	173.61	111.91	108.49	165.84	138.43	166.44	115.08	75.8	205.47	260	21.83	124.01	-0.389033			PBP
TdChr004.2256	0	23.18	2.26	125.5	3.45	2.12	52.18	10.29	111.88	0	16.08	30.67	60.44	44	65.27	65.4	47.51	67.15	41.03	1.64	46.66	0	123.93	1.38103			NF
TdChr006.415	2437.89	120.96	313.06	218.2	403.05	176.93	268.96	347.65	191.68	400.01	114.6	225.53	146.83	212.91	275.58	153.92	200.92	122.06	148.12	115.58	89.61	3.12	123.5	-0.455111			AAA,CDC48_2,CDC48_N,Vps4_C
TdChr002.144	250.76	437.46	597.88	383.02	284.64	199.57	358.61	326.39	64.91	269.42	56.96	65.68	83.95	108.68	100.6	66.41	77.21	65.32	47.69	399.67	112.05	18.63	123.3	0.0473765			Ribosomal_L7Ae
TdChr004.125	420.78	631.7	282.9	237.98	203.51	439.97	561.74	219.96	346.53	186.7	132.28	226.59	393.23	452	227.91	175.95	262.61	385.62	558.38	244.16	662.62	2.39	122.94	-0.638063			GRIM-19
TdChr002.1825	433.15	622.82	331.4	255.86	195.35	557.27	701.11	238.71	261.18	330.09	105.94	231.29	180.49	264.85	203.87	124.81	310.54	220.82	274.15	302.86	200.84	10.7	122.22	-1.09173			Cytochrom_C1
TdChr002.3268	0.08	2.24	0.72	3.69	0.09	1.55	67.65	65.1	505.42	16.85	644.42	383.71	805.02	265.68	511.34	1252.51	418	1122.72	460.76	8.33	1204.01	10.96	122.04	0.000199017			p450
TdChr004.691	2.45	10.02	1.1	32.4	1.48	2.75	1.5	0.26	2.26	0.13	0.94	7.76	1.23	1.26	1.1	0.2	4.04	1.29	2.51	0.04	0.08	0	121.81	56.6291			Pyridoxal_deC
TdChr006.1695	289.97	135.23	163.42	121.09	152.44	286.03	354.85	206.7	231.76	226.08	199.8	541.28	581.26	1074.36	289.27	252.29	504.43	610.17	1635.06	82.7	494.85	0.92	121.66	-0.381879			Complex1_51K,NADH_4Fe-4S,SLBB
TdChr002.2065	18.95	213.97	30.48	49.72	12.91	17.3	50.38	7.89	58.53	1.25	21.13	18.71	28.79	19.42	20.11	8.15	12.14	28.42	23.01	1.07	17.18	1.87	121.46	5.93492			MFS_1,Sugar_tr
TdChr002.1849	19.85	178.07	128.03	176.3	152.98	33.25	88.29	133.34	93.87	0	55.76	94.15	62.26	71.32	14.89	52.8	20.16	34.82	0	148.04	57.34	0	121.38	0.60367			NF
TdChr005.1559	146.82	517.89	384.68	242	229.69	161.7	86.67	78.6	41.65	87.1	73.56	156.82	120.4	106.92	131.96	87.28	145.47	112.25	84.7	86.44	152.12	96.33	121.13	0.0122627			Ribosomal_S19
TdChr001.958	3810.73	985.1	653.47	504.72	717.72	364.94	1047.13	1394.27	422.76	1320.08	215.08	449.43	360.89	553.84	235.83	224.34	481.1	367.92	343.77	1470.6	480.91	828.89	120.89	-0.661748			Skp1,Skp1_POZ
TdChr006.540	197.46	292.95	497.29	400.47	552.57	954.22	964.27	358.11	507.1	563.02	236.69	410.38	637.94	816.77	341.47	313.7	476	699.08	888.41	409.67	1065.16	14.23	120.87	-1.04107			COX6B
TdChr001.2572	429.48	157.84	209.07	275.91	135.06	61	107.55	139.66	48.61	170.84	57.76	78.59	47.73	83.69	54.7	54.14	61.37	37.59	38.43	124.79	34.22	2.5	120.63	0.489516			STT3
TdChr002.2407	1.31	2.96	4.39	12.39	0.43	0.81	0.6	0	0	0	0	0	0	0	0.92	0	0	0	0	0	0	0	120.45	124.922			Histone
TdChr002.679	490.88	158.29	276.37	146.08	223.54	164.9	183.16	156.69	78.82	192.05	153.46	447.99	211.72	180.97	184.26	156.41	375.03	185.36	190.87	40.38	229.3	0.14	119.69	-1.00916			RRM_1,zf-RanBP
TdChr003.735	245.5	321.62	566.11	338.97	383.32	206.94	360.45	346.45	140.68	286.79	96.58	232.18	149.33	169.18	197.16	119.75	200.53	136.06	124.61	332.7	192.72	2.13	118.99	-0.43115			Peptidase_M24
TdChr006.1824	166.33	77.77	252.87	228.45	98.87	102.15	349.56	488.97	79.44	541.69	74.13	110.26	91.05	199.77	148.54	159.48	158.7	121.05	62.94	625.68	115.4	165.79	118.2	-0.265963			MIR
TdChr003.239	516.92	125.63	155.56	103.77	64.71	141.61	1798.17	240.19	566.58	86.58	200.59	267.23	768.66	4340.91	74.41	165.13	235.96	464.76	5742.96	23.24	672.42	0	116.95	-0.193608			Citrate_synt
TdChr001.2769	25.79	130.91	27.64	57.55	144.57	90.32	48.49	14.46	103.32	0.62	27.35	65.27	53.31	21.47	32.71	49.58	69.35	54.35	58.89	1.54	67.45	36.56	116.63	1.54664			ABC1
TdChr004.1211	694.42	665.44	245.5	234.58	268.47	248.04	251.51	261.25	243.63	217.7	113.32	243	173.78	162.08	185.75	172.3	277.64	240.1	177.29	223.52	263.86	960.39	116.63	-1.5563			MMgT
TdChr002.2135	62.13	145.44	79.71	49.09	32.43	21.55	23.54	35.17	5.11	37.27	6.4	10.02	11.04	17.43	9.63	5.04	8.19	6.56	4.06	89.49	24.57	0.47	116.18	2.63835			Tyr_Deacylase
TdChr001.2937	0	0	2.1	0	0	0	0.31	0.32	0	0	0.83	0	0	0.32	0	0	0	0.29	0.7	0	0	0	116.17	280.169			Defensin_2
TdChr004.1416	114.37	114.57	133.18	189.02	137.15	53.23	101.36	146.35	51.83	181.59	50.05	46.61	58.45	81.28	54.23	58.01	43.05	43.55	40.24	177.08	44.69	53.71	116.01	0.781778			Zip
TdChr006.1845	243.02	343.64	248.3	160.98	63.88	62.85	349.17	555.55	46.99	823.24	39.57	73.44	111.72	280.46	37.47	66.39	74.34	86.2	79.45	1122.41	66.18	5.19	115.92	0.149511			Ribonuc_red_sm
TdChr001.722	1.98	94.39	103.34	49.12	23.43	35.29	28.34	15.77	89.93	5.19	76.24	28.44	38.77	35.36	80.07	163.7	28.93	30.98	36.23	6.75	207.19	0.74	115.64	1.35743			NAD_binding_4,Sterile
TdChr002.2697	155.6	246.16	110.6	132.4	73.34	62.25	60.72	72.29	25.6	81.8	23.57	66.7	38.81	47.51	44.1	33.32	55.91	34.36	29.79	112.45	46.02	10.22	115.53	0.919534			SRPRB
TdChr005.2173	566.65	160.98	141.18	167.7	84.77	67.79	151.83	225.36	58.78	202.43	58.98	36.04	52.11	96.43	64.98	100.43	42.12	45.85	32.7	175.87	19.22	14.78	115.52	0.28691			HSP70
TdChr006.1563	87.07	72.6	47.2	79.12	37.14	46.54	55.45	75.91	65.56	70.21	40.93	46.17	23.29	40.62	43.42	26.89	29.13	21.32	25.18	73.15	16.64	1.97	115.33	1.59237			ADP_PFK_GK
TdChr001.945	475.04	218.54	231.83	266.21	162.4	74.3	159.48	247.61	50.04	277.26	86.86	78.45	66.27	121.38	60.53	98.53	66.55	55.68	42.01	270.33	77.95	37.81	115.32	0.10631			Ribophorin_I
TdChr006.2048	667.99	506.78	377.85	238.43	166.82	60.66	146.1	213.97	4.69	109.22	39.41	14.64	19.68	11.11	70.27	19.04	0	16.59	33.02	152.08	39.86	0	115.04	0.384379			TMA7
TdChr001.2947	406.13	560.33	276.37	227.58	150.43	233.61	347.78	123.07	105.42	116.36	37.72	71.89	65.44	80.7	59.78	43.65	88.77	63.35	77.88	129.76	104.08	0.33	114.98	0.0802059			ATP-synt
TdChr004.133	243.49	294.37	250.06	239.74	148.35	79.96	128.44	128.42	34.71	228.61	46.26	52.07	82.65	86.03	82.95	92.95	77.2	57.01	41.28	305.17	92.25	608.08	114.79	0.140917			DAD
TdChr002.1192	1266.07	1161.21	565.13	399.52	308.43	161.15	383.23	476.92	22.66	404.23	17.84	54.84	52.97	131.92	49.11	33.55	60.13	32.61	26.28	628.59	85.43	21.95	114.74	0.000277281			PC4
TdChr003.210	0.08	11.56	85.04	124.29	16.43	0.81	41.78	2.82	10.82	0.42	0	16.75	1.76	4.09	2.63	0.04	8.58	0.63	8.44	0.37	3.77	0	114.45	8.1636			GDC-P
TdChr005.1165	107.43	131.96	104.61	169.92	150.12	77	88.35	100.73	48.7	84.83	53.74	45.22	58.01	55.4	55.31	56.71	44.91	41.55	35.77	83.29	68.36	21.59	114.25	0.892144			EF-hand_7
TdChr001.2558	276.15	129.98	179.49	142.1	90.07	85.43	256.26	365.11	121.91	413.02	34.17	74.92	184.77	199.06	80.27	49.05	87.1	220.39	141.45	245.03	92.46	0.99	114	-0.128521			PP2C,PP2C_C
TdChr002.200	0.18	28.21	4.71	18.19	65.53	50.7	45.5	20.93	121.52	2.57	75.57	157.22	184.07	85.12	54.96	69.25	90.17	145.19	110.21	5.54	174.48	0	113.98	0.5241			-
TdChr005.917	260.84	395.9	231.47	170.75	169.09	117.94	140.54	147.99	76.14	195.5	61.12	133.47	96.15	125.7	70.2	87.03	133.42	89.98	85.37	314.08	129.33	91.05	113.92	-0.192567			BCIP
TdChr004.2049	352.35	430.01	229.59	336.19	1191.17	272.77	288.65	221.42	611.62	138.28	296.93	623.38	396.81	311.35	501.11	363.03	611.91	402.61	454.41	166.12	416.78	3.82	113.76	-1.24779			Lamp
TdChr004.1499	163.13	125.53	69	74.64	177.58	170.81	125.46	102.32	379.11	64.97	88.49	220.28	290.62	214.33	302.86	153.51	177.05	238.97	286.86	72.29	71.96	1.27	113.2	-0.29601			Phospholip_B
TdChr003.576	228.81	131.5	205.54	141.89	199.56	179.73	387.78	572.12	165.17	595.71	118.81	304.69	204.23	330.63	154.57	130.02	236.9	136.85	178.02	241.17	62.18	9.09	113.07	-0.634146			Motile_Sperm
TdChr001.801	316.2	148.57	513.98	241.27	233.32	199.06	402.92	589.76	87.53	701.34	103.67	210.21	246.61	371.15	163.57	141.1	228.98	190.51	165.1	214.19	134.52	3.18	113.02	-0.710397			RRM_1
TdChr003.108	3.93	10.93	4.22	3.06	85.3	11.06	33.52	6.88	8.03	4.35	1.5	8.4	9.7	7.57	5.45	1.88	6.88	9	9.83	6.46	7.45	0	112.64	18.8692			HAD_2,Hydrolase
TdChr002.1239	343.37	568.03	444.46	342.26	229.67	223.27	357.16	294.22	232.73	418.53	234.64	278.5	174.98	284.75	281.1	510.44	302.43	199.92	206.13	346.12	259.68	152.84	112.38	-1.42446			Redoxin
TdChr005.2043	175.25	145.31	115.19	159.9	158.52	82.29	119.72	122.11	173.41	138.33	154.49	164.26	141.11	137.08	200.2	188.84	160.62	141.01	166.88	87.58	142.14	11.23	112.21	-0.716637			Bax1-I
TdChr002.296	0.2	3.16	1.05	4.37	33.47	18.17	79.74	27.69	169.32	10.39	42	68.16	12.35	30.61	283.57	23.98	37.74	3.42	35.76	4.43	15.65	0.2	112.13	2.48102			adh_short
TdChr006.372	0.63	15.41	1.88	0.06	0.04	1.11	21.78	15.13	105.48	2.18	215.07	78.65	66.99	25.06	102.82	498.29	100.9	95.84	40.24	0.85	3.16	0	111.77	0.929002			UDPGT
TdChr005.1348	348.72	323.24	248.92	155.84	146.69	110.94	164.18	202.58	56.78	207.82	39.65	74.9	58.47	95.39	62.33	57.35	81.07	60.97	47.64	261.92	86.43	1.05	111.44	0.130495			Glutaredoxin,Thioredoxin
TdChr002.613	340.04	467.82	326.89	215.78	206.11	150.4	205.16	244.55	142.7	390.69	109.21	161.47	139.45	211.25	274.04	161.9	178.3	135.28	86.4	258.16	187.99	305.36	111.44	-0.782449			UMP1
TdChr005.2115	37.78	114.25	344.84	240.78	188.72	563.6	559.59	263.95	380.14	273.14	170.01	270.14	898.07	1090.53	282.28	264.43	373.22	827.12	1835.57	240.73	1043.25	0	111.15	-0.466582			L51_S25_CI-B8
TdChr004.1354	80.87	174.1	230.09	199.47	37.44	39.31	82.38	74.9	47.49	109.67	25.4	71.15	87.57	144.2	53.37	37.61	67.92	93.59	130.98	127.73	113.99	0.47	111.02	0.407486			PfkB
TdChr003.890	5.61	11.02	172.74	569.8	224.87	122.76	327.85	196.86	946.21	103.23	1257.93	542.15	888.41	379.11	1182.72	1037.28	414.53	757.04	355.77	66.74	1568.5	6.91	110.94	-0.346655			Abhydrolase_1,EHN
TdChr003.1603	17.21	31.04	15.27	25.54	10.24	29	60.35	60.79	129.63	54.81	44.37	62.29	40.86	58.23	165.79	43.59	98.22	47.97	74.81	90.63	57.71	0	110.87	1.45379			Peptidase_M28
TdChr001.3532	26.89	43.44	33.46	56.54	77.4	32.35	45.79	29.89	72.36	17.41	15.43	52.95	29.21	26.76	59.89	28.98	49.78	25.52	30.44	34.85	29.56	0.24	110.66	3.33234			Phos_pyr_kin
TdChr002.699	5.15	485.54	1205.04	726	2.45	465.06	55.18	16.25	64.36	10.72	1.34	70.9	8.66	35.35	83.91	1.17	68.53	3.74	23.38	17.15	8.59	0	110.65	1.23692			DAO
TdChr001.2946	0	0.44	1.26	0	0	0	0.16	0.48	0	0.89	1.45	0	0.32	1.27	0	0.21	0	0.29	2.73	1.11	1.05	0	110.63	93.5932			Defensin_2
TdChr002.769	14.83	10.77	11.88	29.07	11.19	11.15	56.66	38.52	153.96	32.13	48.18	109.84	105.96	65.9	146.83	119.79	126.35	107.84	89.33	20.2	88.41	1.43	110.56	0.590648			COesterase
TdChr001.3528	2.36	213.59	76.32	83.33	70.78	22.12	8.14	4.88	19.35	1.36	33.17	9.79	10.66	3.3	30.99	30.81	24.99	8.8	17.83	2.75	12.72	0.62	110.41	3.61044			Acyl-CoA_dh_1,Acyl-CoA_dh_M,Acyl-CoA_dh_N
TdChr004.177	299.19	421.05	178.32	137.27	141.5	255.19	466.26	246.08	274.92	191.76	99.22	154.47	435.6	2043.69	103.66	100.21	194.6	447.25	3735.17	206.66	764.32	0.17	110.31	-0.332999			Fer2_3,Fer4_17
TdChr005.2151	4.7	249.96	3.87	0.2	0	0	0	0	0	0	0.36	0	0	0	0	0	0	0	0	0	0	0	110.22	551.6			Serpin
TdChr004.608	550.8	738.21	593.01	322.38	173.99	187.59	223.81	279.71	29.99	307.47	39.54	65.18	61.8	107.68	49.24	46.05	52.8	40.67	26.21	399.4	73.39	1.28	109.98	0.00975431			Band_7
TdChr002.3108	263.83	643.42	143.62	182.81	204.94	131.85	84.14	72.62	128.46	91.36	150.29	176.99	148.84	119.69	220.22	205.18	147.75	161.57	148.82	90.64	240.79	8.39	109.96	-0.489703			ER_lumen_recept
TdChr002.606	1905.26	1071.53	287.53	276.6	307.9	298.39	349.6	320.75	362.19	247.75	195.68	362.74	230.57	247.96	153.95	92.8	118.8	92.77	214.17	152.53	87.06	0.96	109.87	-0.770754			ATP-synt_C
TdChr005.1623	753.15	400.87	639.09	365.81	187.62	123.86	386.21	413.4	17.21	567.86	35.92	53.3	89.81	101.1	32.05	92.76	104.52	68.17	45.22	465	132.94	0	109.84	0.000300386			LSM
TdChr003.422	619.26	169.61	164.38	179.22	125.3	62.9	137.54	217.38	51.56	246.49	74.54	70.78	72	120.13	113.61	145.71	79.98	61.88	50	146.05	39.05	8.22	109.06	-0.0502967			EF-hand_5,PRKCSH-like,PRKCSH_1
TdChr002.355	586.93	821.59	421.25	260.5	212.99	109.98	221.48	259.48	149.85	257.47	79.74	106.55	101.54	123.65	225.69	124.79	113.19	74.6	70.41	261.88	138.52	42.35	108.63	-0.197304			Proteasome,Proteasome_A_N
TdChr003.2279	592.08	669.95	1086.95	337.16	128.8	149.96	564.77	482.06	10.31	491.54	12.25	32.89	52.47	111.65	20.92	18.35	37.43	17.51	9.91	737.49	52.54	3.01	108.62	0.000214011			Ribosomal_L7Ae
TdChr004.1782	211.66	100.11	78.44	75.05	92.93	65.6	73.91	89.42	36.46	99.47	29.61	43.8	43.22	51.12	33.92	30.16	37.8	32.29	30.59	133.62	37.65	0	108.12	1.0181			EAF
TdChr004.1536	260.23	808.77	226.04	322.9	1445.27	643.56	793.92	396.71	1721.77	241.29	1006.19	1841.56	1733.82	1305.54	1535.68	1584.59	2164.99	2031.99	2196.39	286.14	1687.05	11.52	107.99	-0.641505			Atg8
TdChr005.668	733.84	798.89	324.94	274.35	259.45	388.39	622.51	280.5	323.38	241.34	61.54	191.73	229.74	204.52	130.83	159.19	227.89	268.44	236.55	303.96	582.45	241.87	107.85	-1.40206			NF
TdChr005.2079	395.79	268.77	345.44	243.51	130	148.98	232.47	303.05	76.59	401.7	56.64	105.29	135.5	214.37	117.1	86.29	145.21	131.08	148.32	327.67	115.66	34.23	107.04	-0.262751			eIF3_subunit
TdChr006.1629	1177.38	208.66	744.3	353.57	401.34	207.79	918.89	1599.24	39.85	2441.09	63.07	122.01	263.17	920.47	72.29	71.12	88.67	68.33	57.36	956.92	117.72	0	107.01	-0.132475			Histone,Histone_H2A_C
TdChr002.2999	466.75	406.19	216.83	182.77	100.19	60.07	142.63	201.65	42.48	212.23	54.25	44.51	43.67	93.37	45.82	63.3	44.01	36.02	27.2	299.93	52.94	4.85	106.93	0.295373			Peptidase_M48,Peptidase_M48_N
TdChr003.683	411.71	513.38	474.56	370.43	220.98	305.91	704.67	381.34	309.36	258.24	65.47	98.15	123.54	153.38	99.63	91.5	183.95	167.96	174.42	697.52	366.82	50.37	106.84	-0.437278			NDUF_B7
TdChr006.339	246.82	298.07	288.18	232.23	208.6	118.37	212.15	245.81	111.2	292.42	77.53	151.66	134.99	178.06	145.34	126.81	180.06	116.39	104.86	273.63	114.25	15.61	106.21	-0.366317			CSN8_PSD8_EIF3K
TdChr003.1072	604.12	361.19	693.01	369.44	168.94	94.01	700.87	1219.23	26.71	958.96	30.78	59.43	96.48	406.06	33.53	32.26	42.65	41.38	30.55	1257.25	52.28	15.6	106.03	0.0206313			FKBP_C
TdChr002.2530	0.08	6.7	17.91	14.4	12.27	5.5	31.64	27.99	252.37	5.92	275.46	270.39	132.57	133.81	242.63	287.22	271.14	204.21	198.33	2.07	7.83	0	105.96	0.344131			p450
TdChr006.1713	1254.84	973.93	442.7	306.63	276.41	135.24	277.26	349.98	217.64	337.59	101.61	129.19	98.93	153.9	260.53	175.83	134.78	111.79	89.7	307.18	157.31	3.12	105.9	-0.374393			Pr_beta_C,Proteasome
TdChr003.187	2.03	175.89	120.76	197.92	6.53	68.82	29.96	6.39	44.2	3.46	53.41	34.83	79.48	23.52	86.23	49.16	25.96	70.67	31.76	0.58	29.64	9.33	105.89	1.21123			PTR2
TdChr005.1692	0.53	10.7	0.35	0.03	0.02	0	0.12	0.05	0	0.24	0	0	0.07	0	0	0	0	0.03	0	0.16	0	0	105.42	439.583			ERAP1_C,Peptidase_M1
TdChr002.900	14.36	80.39	21.65	24.56	41.85	301.65	246.65	56.58	436.14	0.9	311.58	1103.58	556.52	369.67	63.58	359.65	962.16	505.76	550.03	2.83	191.92	0	104.91	-0.235019			-
TdChr002.3148	203.4	410.09	77.6	127.61	349.25	286.18	320.98	295.42	1305.94	150.08	480.2	985.79	743.78	578.65	1243.29	810.14	861.85	800.52	854.16	153.05	1154.9	12.89	104.81	-0.466618			PB1,UBA_5,ZZ
TdChr003.1595	246.05	275.04	50.57	51.05	256.68	85.65	225.96	279.92	172	169.04	33.32	110.03	86.4	98.98	45.12	14.3	44.04	35.43	135.21	154.57	3.73	1.55	104.41	0.043875			UQ_con
TdChr005.1290	743.81	573.79	221.35	159.86	81.37	227.39	464.07	228.65	273.49	224.8	65.61	280.21	365.84	2306.05	63.21	63.1	339.74	336.84	3732.38	205.08	613.97	4.64	103.52	-0.441233			Iso_dh
TdChr002.3230	34.44	102.52	82.48	76.08	68.53	36.9	42.04	29.23	106.83	24.79	36.4	92.36	42.45	55.16	210.09	74.98	85.56	59.5	80.79	22.33	64.36	0.53	103.08	0.81778			HLH
TdChr005.1630	1081.04	1041.14	806.18	399.64	288.67	181.24	317.42	445.83	40.14	520.45	71.78	93.29	124.31	218.92	87.24	90.43	88.22	78.84	43.44	331.66	85.74	1.97	103	-0.0759507			Cpn60_TCP1
TdChr002.1349	1214.78	534.25	273.55	137.99	211.8	458.39	613.18	840.9	294.64	1710.28	431.06	486.91	691.2	877.73	867.98	832.64	656.68	765.74	499.46	1302.39	926.93	263.77	102.88	-1.03765			RNA_pol_Rpb6
TdChr003.2277	725.23	419.43	307.3	186.87	125.2	88.69	173.53	242.75	44.8	282.25	44.67	62.35	80.56	115.61	73.09	56.08	62.63	72.16	63.99	183.55	85.82	3.17	102.74	0.115984			Paf67
TdChr003.1790	113.43	14.91	486.16	267.06	469.21	181.66	387.53	521.07	92.02	434.51	119	295.68	190.18	275.02	127.98	117.15	207.47	146.55	209.67	141.34	128.67	0.17	102.72	-0.471038			NOPS,RRM_1
TdChr004.1418	13.84	594.06	30.32	156.36	356.38	82.44	111.16	64.77	359.58	15	120.08	523.97	254.53	158.34	559.52	138.42	346.33	226.21	214.03	13.75	210.89	0	102.71	-0.235981			-
TdChr004.348	73.94	21.33	134.33	190.75	137.64	60.49	77.22	103.14	61.61	62.58	20.53	45.6	29.58	45.84	23.02	15.77	22.76	17.21	37.88	49.52	13.19	1.21	102.14	1.05155			KH_1
TdChr001.1249	1166.91	810.14	299.24	207.03	203.63	181.33	269.26	316.19	80.77	504.39	83.07	158.01	159.8	240.77	128.12	130.13	167.13	143	98.88	494.13	193.86	132.36	102.01	-0.517423			RRM_1
TdChr002.3296	1801.35	537.62	717.15	417.33	762.79	1090.49	1844.49	2429.65	557.97	2194.04	315.1	1129.36	3007.01	1704.23	495.82	227.69	544.01	965.26	1006.87	630.28	779.54	3.89	101.92	-0.734046			CSD
TdChr002.855	504.91	864.4	870.36	356.72	179.03	124.97	544.6	929.12	53.85	1182.96	58.3	105.77	138.42	439.22	80.79	52.21	93.9	63.08	46.13	1114.72	99.78	22.95	101.77	-0.0510024			NAP
TdChr006.364	32	121.02	140.02	292.7	124.81	454.72	162.21	56.78	55.02	76.83	29.14	106.07	57.87	44.81	65.25	46.44	121.32	51.86	43.82	64.05	50.27	51.59	101.66	0.53611			adh_short,adh_short_C2
TdChr006.493	0.08	2.27	14.59	32.87	7.18	5.64	2.49	1.12	10.5	0.39	0	0.25	0.06	0.36	18.66	0.29	0.52	0	0	0.11	0.21	0	101.54	15.7833			p450
TdChr003.1329	490.7	514.69	147.42	165.73	163.39	163.62	174.08	189.33	94.48	251.25	65.64	239.53	81.77	132.87	79.32	91.35	237.38	80.28	91.57	183.79	68.15	49.32	100.92	-0.463536			41701
TdChr004.800	67.74	78.69	89.62	146.37	192.33	137.81	159.93	113.83	252.65	99.7	212.44	183.31	246.93	171.29	393.64	250.32	205.65	286.14	249.12	51.39	230.6	0.28	100.81	-0.507756			SCP2,Thiolase_C,Thiolase_N
TdChr001.3581	1283.62	588.15	931.66	402.25	140.14	143.8	1499.93	2869.43	17.65	2547.45	42.27	35.58	184.7	892.64	23.8	30.23	29.89	43.03	14.42	3405.29	69.05	14.47	100.67	-0.044772			RRM_1
TdChr004.2251	560.63	407.11	516.3	281.07	318.62	181.59	335.56	446.89	75.76	538.9	41.08	79.29	116.75	238.52	73.71	53.04	80.18	72.91	72.03	554.57	103.5	7.84	100.6	-0.054095			UQ_con
TdChr006.058	78.78	26.91	59.5	34.29	2.17	69.39	18.28	9.9	23.52	12.35	23.21	2.61	9.83	8.08	21.81	39.74	5.99	18.4	4.78	19.87	5.42	0.82	100.4	3.46926			Beta_elim_lyase
TdChr003.1074	575.79	740.97	588.12	350.72	284.32	207	367.35	448.74	92.33	468.18	81.35	149.79	138.42	226.38	97.53	97.4	137.04	110.02	92.46	370.58	159.95	16.66	100.18	-0.220828			Cpn60_TCP1
TdChr004.1457	34.94	173.66	199.69	176.84	195.11	141.6	226.81	127.84	312.37	65.85	115.65	135.38	124.59	77.04	206.47	130.61	154.4	109.71	68.8	120.36	189.36	12.31	100.18	-0.387579			Tmemb_14
TdChr003.1491	967.14	938.63	650.41	578.61	887.89	546.02	542.45	558.21	460.85	602.42	249.9	687.99	338.61	386.33	376.99	567.8	726.65	315.31	266.64	291.53	298.13	0.31	99.96	-1.38335			Tubulin,Tubulin_C
TdChr001.3546	1373.99	609.14	537.85	355.67	414.15	184.64	404.32	506.72	115.12	474.92	121.96	356.92	155.27	223.39	93.66	105.01	208.16	103.87	134.5	384.74	143.11	20.97	99.66	-0.372771			RRM_1,zf-CCHC
TdChr001.942	162.63	100.14	141.45	194	114.07	78.44	168.8	267.64	59.01	301	36.36	99.51	77.84	136.67	45.71	42.26	83.31	57.88	45.6	270.77	83.85	2.45	99.51	0.00106729			TMEM214
TdChr003.253	6.24	22.01	15.63	17.62	11.04	0.64	0.56	0.25	2.46	0.34	1.27	0	0	0.23	5.36	0	0.1	0.04	0.26	0.09	0	0	99.19	16.958			NF
TdChr006.1199	391.93	364.69	250.24	291.62	256	253.48	469.78	325.19	824.79	245.71	499.55	863.26	722.96	644.24	595.78	605.12	938.26	704.24	1008.09	287.75	628.76	68.43	99	-0.921024			ATP-synt_ab,ATP-synt_ab_N
TdChr005.551	0	0.38	11.57	27.14	320.37	37.59	4.15	0	0.13	0.24	0	0	0	0	0.82	0	0	0	0.24	0	0.29	0	98.87	38.236			NF
TdChr004.616	282.94	320.08	180.74	151.36	72.22	64.21	89.49	115.61	16.08	132.81	12.35	30.95	32.58	60.3	34.35	15.83	36.59	25.62	28.87	157.36	25.96	1.08	98.86	0.398989			tRNA-synt_2,tRNA_anti-codon
TdChr002.2374	124.68	69.08	49.66	63	44.06	32.63	88.11	95.54	30.53	72.68	43.3	31.61	31.09	31.54	11.61	31.72	30.25	20.05	8.53	104.14	7.94	0.06	98.82	1.63316			-
TdChr005.220	157.12	122.13	67	82.52	61.9	55.01	98.45	102.13	103.98	142.52	87.59	85.16	107.53	100.79	157.69	150.78	98.76	107.93	71.66	139.78	115.64	0.52	98.75	-0.0551999			Rhomboid
TdChr002.2564	1.11	9.3	37.27	78.95	32.98	47.2	22.24	14.68	41.76	6.55	12.06	37.17	15.89	19.32	12.84	5.11	13.71	6.45	26.62	10.37	4.45	1.46	98.68	3.08624			UNC-93
TdChr002.3658	380.87	572.07	191.46	139.41	171.33	269.61	331.28	248.45	673.03	235.68	813.41	2468.07	2166.47	3610.82	713.33	1257.19	2311.29	2566.15	4953.28	145.25	3026.49	192.08	98.64	-0.233732			NifU_N
TdChr002.640	762.13	850.12	731.04	362.97	219.48	292.23	348.5	507.26	56.87	481.42	42.23	95.45	82.63	192.05	99.38	62.11	105.64	63.16	51.67	810.57	173.14	25.81	98.51	-0.213309			MAM33
TdChr002.3273	0	0.71	8.98	36.93	7.93	6.23	17.97	17.56	158.88	11.49	89.8	98.87	109.69	50.96	329.73	77.07	103.28	134.18	68.81	2.64	103.41	0.09	98.35	0.512187			p450
TdChr006.883	970.45	237.91	604.28	375.69	484.76	180.3	339.78	338.7	91.64	320.04	88.19	206.2	185.58	192.09	104.7	78.57	133.91	130.41	168.8	143.05	127.92	0.62	98.29	-0.384265			HnRNPA1,RRM_1
TdChr005.1698	231.72	281.1	369.71	244.88	167.65	94.68	176.1	217.27	46.27	268.82	41.14	69.15	75.03	125.35	71.46	43.97	70.65	62.29	46.48	221.61	130.72	2.04	98.03	0.000650111			CSN8_PSD8_EIF3K
TdChr006.1013	465.16	267.5	244.16	258.06	246.96	66.87	131.28	194.89	104.13	126.81	69.17	131.93	82.03	88.93	67.82	51.4	60.37	40.37	56.16	145.24	37.78	0.89	97.32	0.000938571			DUF5110,Gal_mutarotas_2,Glyco_hydro_31
TdChr002.2552	465.79	485.65	278.86	240.38	171.69	373.14	604	203.56	221.69	204.84	69.02	189.96	158.33	335.95	119.17	77.84	207.58	155.33	359.07	169.03	193.53	12.39	97.3	-0.704563			Peptidase_M16,Peptidase_M16_C
TdChr001.2583	31.58	104.92	57.79	58.39	40.64	43.93	47.52	42.49	60.29	52.15	111.63	102.73	124.3	77.04	108.71	187.01	115.29	136.83	94.58	56.14	304.73	86.24	97.09	0.1951			Glyoxalase
TdChr001.2868	57.26	13.99	60.04	100.97	70.61	58.29	94.66	103.04	75.23	97.39	54.89	115.17	64.74	74.05	67.05	60.96	65.67	46.39	60.17	66.46	28.4	0.91	97.01	1.15292			Sel1,fn2
TdChr003.445	396.17	394.44	344.88	210.17	93.49	80.94	170.46	235.53	21.41	276.78	32.96	32.41	50.36	111	47.73	35.58	41.48	33.79	28.95	277.76	43.58	0.69	96.89	0.0852522			PCI
TdChr005.864	351.62	103.3	358.9	217.37	362.41	158.01	199.82	238.97	72.5	228.72	124.59	140.94	76.48	111.45	62.58	117.53	59.89	38.31	44.02	81.97	20.58	0.05	96.4	-0.105912			KH_1,ROKNT
TdChr001.3329	245.57	100.14	104.62	119.84	85.7	47.72	75.18	85.08	52.56	84.93	30.15	44.23	34.1	45.06	43.15	30.33	37	23.24	28.02	50.26	19.31	0.51	96.32	0.914125			Gelsolin,Sec23_BS,Sec23_helical,Sec23_trunk,zf-Sec23_Sec24
TdChr003.339	58.18	158.52	163.87	221.23	266.28	156.23	143.66	97.63	301.06	76.36	144.62	233.01	249.44	167.3	268.42	242.13	249.54	234.18	306.66	124.05	402.2	20.68	96.27	-0.612866			NF
TdChr006.1516	602.26	463.46	346.87	228.35	124	98.22	187.89	244.62	54.6	279.27	65.81	104.9	84.97	132.37	79.28	79.29	98.26	68.47	62.16	288.79	104.75	39.46	96.19	-0.0537826			PCI,eIF3_N
TdChr005.258	0	74.66	24.21	72.44	165.13	37.63	42.4	11.26	87.15	2.8	85.94	172.54	35.66	41.82	44.33	52.17	164.27	39.87	56.99	0.27	51.72	0	96.12	1.02824			VKOR
TdChr004.406	43.31	37.85	44.63	48.83	154.83	39.13	68.87	101.47	157.99	104.26	85.5	106.06	148.27	88.29	82.47	82.27	53.6	88.53	55.53	95.18	37.72	0.88	95.95	0.260753			Amidase
TdChr003.908	215.79	116.67	183.06	198.08	182.63	102.62	130.85	202.54	36.95	231.11	49.31	12.06	87.27	77.5	74.24	64.72	68.87	49.47	52.57	229.12	116.81	0	95.7	0.000804505			NF
TdChr005.034	12.93	8.75	22.78	24.33	52.67	12.32	52.84	98.69	14.19	117.69	14.36	16.06	100.71	89.27	12.48	17.4	12.45	64.32	56.46	63.74	87.84	2.77	95.54	1.13877			MCU
TdChr006.925	89.38	32.01	131.41	120.59	241.24	155	159.48	175.66	78.09	250.35	63.23	210.42	103.45	133.45	94.35	78.73	120.38	77.51	88.43	131.12	40.39	13.66	95.37	-0.121065			UQ_con
TdChr002.1850	157.45	244.99	159.58	230.33	236.43	134.63	168.79	208.17	129.22	260.43	119.44	178.56	119.57	156.74	127.87	138.86	183.74	98.94	113.88	212.83	108.84	15.48	95.34	-0.800784			Lectin_leg-like
TdChr003.1980	374.31	308.05	371.61	225.57	136.77	111.44	170.11	218.01	53.86	275.01	47.01	100.21	86.83	127.67	77.93	66.4	109.97	79.39	63.6	263.03	113.48	30.58	95.16	-0.112965			JAB
TdChr001.1168	1.07	0.65	1.25	25.03	342.75	111.37	15	0.04	1.71	0	0	0.23	0	0.16	0.2	0	0	0	0.38	0	0.1	0	94.88	59.9873			p450
TdChr002.3227	174.04	124.45	309.54	256.67	240.33	111.12	235.18	293.36	146.03	285.23	79.1	163.81	119.5	167.09	190.86	129.35	177.13	130.67	109.56	205.23	139.53	18.12	94.54	-0.703448			UIM,VWA_2
TdChr002.2239	255.98	294.49	205.3	271.93	211.13	176	434.77	250.43	331.09	231.43	71.67	259.26	189.24	1088.89	119.64	78.8	193.19	162.09	1331.19	222.38	143.88	6.95	94.5	-1.03389			CoA_binding,Ligase_CoA
TdChr002.1206	379.75	216.55	97.11	99.54	120.13	113.97	108.95	101.99	137.55	100.09	131.12	172.24	118.08	102.56	151.66	209.89	176.04	121.1	105.56	96.8	116	19.73	94.4	-0.492385			UQ_con
TdChr003.1532	48.56	4994.87	9827.79	4845.27	103.19	0.21	2.73	0.43	1.91	0.77	0.22	0.23	0.51	0.5	0.53	0.23	0.35	0	0.61	0.33	3.63	0	94.33	3.62338			Trypsin
TdChr005.067	82.72	96.33	56.41	40.26	31.33	19.3	34.96	63.91	6.97	56.46	4.53	8.24	7.07	25.74	4.33	2.57	4.77	4.21	4.5	80.42	4.36	0.15	94.09	1.43964			Anticodon_1,GST_C,GST_C_3,WHEP-TRS,tRNA-synt_1g,tRNA_bind
TdChr003.1427	41.2	71.89	120.21	98.77	58.55	47.75	64.67	72.6	22.25	68.73	16.78	32.8	31	39.72	32.49	19.98	39.3	26.74	21.35	58.52	65.5	5.19	94.05	1.38088			Ribosomal_L38e
TdChr002.889	293.78	208.46	270.62	168.23	76.79	210.76	504.53	204	173.95	222.47	37.15	117.8	255.88	2317.89	29.68	34.72	127.69	243.73	3158.56	171.55	368.4	0	93.99	-0.698041			Iso_dh
TdChr006.2024	346.06	249.26	140.98	124.72	86.57	46.68	97.56	141.17	42.63	171.52	28.86	81.49	70.45	93.71	65.2	30.28	59.51	44.58	41.57	123.63	82.35	0.86	93.85	0.147498			Creatinase_N,Creatinase_N_2,Peptidase_M24,Peptidase_M24_C
TdChr006.481	2035.07	1323.12	753.73	419.76	845.95	1044.14	477.82	629.09	163.54	1294.63	186.96	500.07	441.15	662.29	313.49	221.22	438.21	416.04	246.03	663.37	213.91	0	93.85	-0.730909			Histone
TdChr003.818	27.53	17.79	35.8	38.28	94.86	53.64	28.95	47.42	8.34	12.94	4.2	12.09	5.39	6.65	10.01	4.64	11.16	5.18	7.71	28.08	7.06	0	93.58	3.18462			DUF4789
TdChr006.2174	0	2.19	0.78	181.7	10.9	0	4.61	13.8	15.08	6.8	13.23	26.39	43.05	61.75	4.17	4.93	22.69	17.78	83.45	7.34	324.6	16.31	93.23	2.64659			NF
TdChr005.1867	774.82	864.81	364.52	216.28	195.97	125.66	201.9	211	143.68	301.84	93.13	108.3	112.3	143.12	219.34	160.35	147.89	129.46	99.56	238.39	173.09	21.21	93.18	-0.677954			Proteasome
TdChr004.1366	439.53	402.02	310.65	165.59	86.56	82.57	128.92	149.68	16.6	187.78	23.97	29.93	40.33	85.71	40.39	29.74	35.96	28.04	21.97	253.88	37.05	1.6	93.17	0.0836591			EIF_2_alpha,S1
TdChr003.170	331.22	279.05	368.95	264.41	220.1	143.1	207.21	243.21	162.72	269.08	109.82	173.23	143.8	155.59	315.69	186.5	193.62	170.19	107.8	197.77	188.37	11.95	93.07	-0.913496			Proteasome
TdChr004.585	276.04	18.56	19.72	11.22	35.21	67.03	11.3	9.1	8.99	8.22	1.65	4.15	7.01	5.37	6.61	2.96	2.44	4.24	6.31	11.19	3.24	0	92.94	7.82833			Reprolysin_2,Reprolysin_3
TdChr002.229	0	14.55	2.12	7.65	12.99	0	0	0.69	0.98	0	50.11	0	0.41	6.74	0	4.57	0.28	0.13	4.55	0	0.93	0.16	92.83	16.0278			NF
TdChr006.2021	0.41	3.25	0.79	0.53	1.39	0.68	0.5	0.53	0.53	0.43	0.05	0	0.16	0.38	0.06	0.11	0	0.07	0.14	0.15	0.18	0	92.73	171.204			Serpin
TdChr003.525	182.34	180.03	95.44	97.23	61.77	68.45	47.03	52.08	32.41	89.94	50.99	48.16	48.49	62.56	64.18	63.46	55.02	45.04	53.92	81.05	55.84	6.59	92.55	0.861247			UFC1
TdChr004.2273	131.14	104.57	21.78	49.31	73.01	29.02	116.59	151.25	51.96	173.87	36.24	36.19	47.27	90.75	46.08	69.89	40.03	50.17	41.95	207.89	51.74	25.11	92.41	0.707812			GLTP
TdChr006.1978	26.33	31.62	9.92	40.2	54.43	19.24	24.34	17.04	45.3	10.56	41.29	64.36	39.1	29.89	51.55	73.11	40.8	52.14	50.21	10.57	57.76	0.39	92.33	1.73205			PfkB
TdChr001.265	36.7	454.79	143.51	189.24	70.04	54.86	48.76	50.2	50.62	53.5	39.83	52.76	46.89	48.12	79.32	37.59	51.39	37.93	46.95	46.87	60.2	2.1	92.27	2.27644			CoA_trans
TdChr006.461	2.87	246.92	10.55	77.94	48.44	29.84	28.4	42.2	105.06	24.12	1.19	2.85	4.88	5.23	340	1.19	0.79	2	1.49	1.7	138.44	0	92.25	1.33138			Aminotran_3
TdChr002.2038	762.71	85.75	164.45	86.76	335.14	207.85	212.83	357.47	84	507.01	34.44	57.34	348.47	232.97	62.31	68.97	46.76	232.57	44.08	124.99	42.25	0.6	92.18	0.000577884			JUPITER
TdChr005.558	83.02	28.36	0.45	0.08	0	0	0	0	0	0	0	0	0	0	0	0	0	0	0	0	0	0	92.04	921.4			NF
TdChr001.749	219.08	176.67	341	241.63	195.26	92.17	218.87	240.73	102.38	272.98	67.22	124.84	102.27	138.92	173.31	110.88	153.57	89.34	75.33	227.8	102.59	15.72	91.98	-0.384391			PCI
TdChr002.095	73.18	25.06	76.23	85.27	103.08	75.06	89.65	120.9	81.11	95.21	47.39	85.88	71.42	74.91	67.95	55.43	65.46	65.09	80.41	37.34	41.57	0.85	91.87	0.671257			Gelsolin,Sec23_BS,Sec23_helical,Sec23_trunk,zf-Sec23_Sec24
TdChr003.852	405.95	510.38	190.92	144.13	147.73	134.75	176.95	223.87	77.97	243.59	58.91	129.42	92.27	129.2	124.11	88.9	183.6	74.1	68.2	244.17	93.45	93.87	91.83	-0.393348			HTH_3,MBF1
TdChr003.395	297.41	232.08	287.42	181.52	110.71	70.55	182.46	268.9	43.62	228.03	35.93	77.65	52.58	112.41	39.55	30.82	47.63	32.49	49.28	218.7	27.51	5.17	91.49	0.0876206			PCI,eIF-3c_N
TdChr005.1182	98.24	133.46	90.71	76.56	124.8	79.48	96.2	64.25	63.96	64.58	24.59	84.21	44.64	46.72	30.24	31.42	82.28	35.16	43.23	63.69	57.88	0.55	91.41	0.624871			Mtc
TdChr006.260	165.57	319.5	286.98	236.2	437.39	271.45	449.03	262.08	542.06	218.3	286.4	360.4	305.43	270.15	552.42	186.68	254.7	237.7	359.38	177.74	105.65	65.7	91.37	-1.30376			Tetraspannin
TdChr003.1484	162.45	205.1	267.13	155.06	101.84	219.99	216.78	185.73	62.4	299.18	65.76	99.88	104.78	183.67	91.35	89.19	120.54	88.95	115.97	315.17	260.16	2.36	91.23	-0.243925			Ribosomal_S17
TdChr004.430	13.31	29.05	42.31	40.26	228.02	80.4	103.02	65.01	276.94	35.42	85.3	81.65	81.61	43.78	132.73	71.25	40.84	42.61	52.66	35.38	27.08	0.13	91.16	0.843993			AMP-binding,AMP-binding_C
TdChr002.968	111.52	61.59	30.43	10.7	10.04	9.83	15.88	23.26	10.84	25.63	6.17	2.36	2.18	9.61	29.63	3.1	3.51	1.51	1.71	23.15	2.97	0	91.14	3.77499			AA_permease_2,AA_permease_C
TdChr001.3590	407.78	216.26	180	146.55	93.81	69.3	89.88	121.25	28.58	154.77	34.37	35.33	56.38	71.72	50.99	42.57	52.82	50.01	39.45	130.05	31.85	18.04	91.07	0.258084			WD40
TdChr004.160	181.31	213.02	270.18	182.61	167.37	113.47	158.93	181.81	115.78	215.13	76.67	144.11	143.85	154.3	232.23	122.65	187.82	159.34	151.08	217.85	179.64	35.91	90.92	-1.31221			PITH,Thioredoxin
TdChr001.755	2798.03	1105.89	919.86	437.08	545.7	353.76	556.16	871.28	49.16	1300.37	126.94	242.61	297.14	562.46	133.02	189.54	196.61	189.73	137.42	598	217.65	13.59	90.81	-0.494734			Chromo,Chromo_shadow
TdChr002.374	9.56	49.9	55.38	91.44	186.56	61.96	80.81	76.95	416.29	12.21	127.45	265.05	168.91	126.65	162.34	100.99	99.15	84.07	169.4	14.72	29.98	0.37	90.78	0.00108278			bZIP_2
TdChr004.1820	424.35	422.31	644.14	329.6	285.31	94.48	234.54	328.68	39.59	283.34	35.53	25.92	93.1	153.05	27.87	48.69	17.75	33.24	30.69	572.78	53.57	40.49	90.78	-0.00823641			LSM
TdChr002.221	463.54	501.5	209.67	218.72	188.41	161.1	212.64	200.11	133.56	171.04	82.67	147.5	127.07	187.71	123.75	118.28	173.12	129.2	171.67	248.01	183.65	192.53	90.74	-1.11778			Clathrin_lg_ch
TdChr004.357	0.91	20.3	8.63	30.68	142.74	9.4	24.37	23.79	162.99	3.46	1.38	299.12	22.16	65.47	131.4	2.04	285.04	16.78	100.63	0.82	35.95	0	90.6	0.74618			Aminotran_5
TdChr002.3562	265.33	198.29	169.97	180.07	106.26	60.85	107.17	151.97	50.07	143.1	41.44	48.83	51.56	76.49	54.53	47.5	50.78	48.12	46.55	170.8	45	8.44	90.59	0.300928			Adap_comp_sub,Clat_adaptor_s
TdChr002.2060	694.39	387.52	436.22	254.7	235.53	283.68	969.63	1617.21	255.24	2162.42	171.04	339.29	664.65	1363.23	216.86	200.52	346.79	486.26	1076.26	1799.07	312.29	13.61	90.52	-0.436409			DnaJ,DnaJ_C,DnaJ_CXXCXGXG
TdChr002.3006	0.56	22.23	21.78	32.98	19.76	15.03	70.83	77.75	743.85	12.84	16.38	65.45	28.72	56.21	443.45	16.69	56.71	29.78	69.72	4.14	33.02	0.93	90.44	1.18788			GFO_IDH_MocA,GFO_IDH_MocA_C
TdChr002.336	79.06	141.41	120.55	90.77	87.93	191.06	213.32	213.7	173.87	248.98	40.6	168.49	918.14	295.05	112.55	44.41	125.45	671.4	272.3	59.58	372.9	0.55	89.84	-0.361054			DUF1899,Trimer_CC,WD40,WD40_4
TdChr004.002	636.77	169.87	599.07	319.44	485.63	254.38	492.81	530.46	76.67	657.2	106.52	250.67	201.23	269.55	171.1	132.73	248.21	130.42	152.3	279.03	114.58	0.84	89.82	-0.583967			dsrm
TdChr001.241	423.96	286.07	263.86	161.06	105.86	80.96	136.71	188.84	42.03	247.87	43.88	60.92	62.22	111.37	68.94	49.22	62.83	58.32	47.25	248.23	74.86	5.53	89.54	0.0751971			RRM_1,eIF3g
TdChr004.1330	742.5	263.77	133.64	158.13	73.17	65.22	205.52	297.72	77.29	333.76	81.77	67.76	83.05	149.27	115.53	140.39	94.41	88.63	52.8	415.54	60.6	234.27	89.33	-0.185811			DnaJ,DnaJ_C
TdChr006.1823	444.04	255.69	244.82	202.49	146.26	164.75	275.95	328.97	134.6	442.96	111.51	258.22	216.33	260.21	190.84	167.54	267.96	239.17	212.14	376.56	185.69	8.11	89.23	-1.29539			Miff
TdChr004.1477	172.46	113.4	36.07	30.08	37.82	25.24	32.3	40.5	25.8	49.64	20.42	40.91	23.07	36.98	30.04	17.19	17.25	15.44	25.75	60.52	3.69	11.14	88.96	3.09444			MFS_1
TdChr004.2067	16.37	27.43	15.06	27.5	29.59	12.85	17.14	16.64	26.59	12.99	21.44	33.05	22.04	22.19	37.01	19.09	25.33	20.57	21.58	17.24	31.93	0.98	88.78	6.30445			ERAP1_C,Peptidase_M1
TdChr001.3399	504.71	204.83	195.95	146.26	98.35	244.18	341.63	150.33	127.33	168.54	68.23	142.71	206.62	202.29	71.28	77.92	133.42	174.2	209.84	56.03	157.09	0.64	88.68	-0.558809			2-oxoacid_dh,Biotin_lipoyl
TdChr001.2575	33.93	31.82	69.61	59.05	62.01	35.35	48.46	66.91	12.98	52.37	5.78	23.3	11.48	26.22	14.68	4.82	13.1	7.24	9.37	46.74	10.4	0.54	87.92	1.56159			GST_C,GST_C_3,HGTP_anticodon,ProRS-C_1,WHEP-TRS,tRNA-synt_1c,tRNA-synt_1c_C,tRNA-synt_2b
TdChr001.2924	211.19	117.61	468.42	242.19	141.78	82.45	178.87	179.01	31.76	185.33	33.02	63.76	53.81	88.74	52.46	39.08	56.57	39.71	35.46	344.42	75.91	14.99	87.75	0.0406152			La,RRM_1,RRM_3
TdChr006.217	928.84	77.74	215.69	99.07	298	172.39	209.38	324.69	67.67	323.53	74.46	99.55	172.08	192.79	94.34	57.72	63.41	73.48	107.33	83.38	27.51	0	87.62	-0.089219			HHH
TdChr002.3173	377.21	296.24	270.78	179.41	125.29	81.87	116.05	155.5	36.13	188.27	30.83	44.86	53.95	88.91	55.08	32.48	42.11	40.83	39.97	191.77	57.59	3.19	87.51	0.0455248			ABC_tran,Fer4,RLI
TdChr006.2084	78.52	42.52	46.29	62.89	51.61	20.59	58.18	54.88	87.37	32.93	18.79	30	23.26	20.68	35.83	34.21	18.83	14.32	14.32	25.15	9.91	0.05	87.39	1.62212			ABC_membrane,ABC_tran
TdChr006.059	438.74	272.61	247.54	162.73	96.34	55.44	155.1	258.62	38.61	225.59	38.9	48.99	50.39	107.32	53.54	37.21	38.96	33.94	42.31	181.03	31.5	4.54	87.37	0.240737			eIF-3_zeta
TdChr004.341	491.13	453.81	583.63	269.76	229.36	149.78	282.23	396.47	37.47	453.11	31.4	73.59	77.56	151.26	62.77	34.26	85.09	44.56	34.19	354.84	52.27	1.91	87.29	0.000370069			Tom22
TdChr001.2935	0	1.73	0.39	0	0.62	0	0.43	0	0	0	0	0	0	0	0.68	0	0	0	0	0.33	0	0	87.23	189.848			Defensin_2
TdChr001.3516	285.26	194.35	155.66	147.61	103.4	100.01	77.83	66.5	84.13	87.82	71.36	116.18	100.38	79.7	132.18	130.55	156.81	105.52	82.6	108.04	108.31	3.03	87.22	-0.334304			DER1
TdChr002.734	24.81	270.18	283.48	350.75	80.59	99.9	172.66	181.75	216	142.77	162.18	274.64	107.85	177.09	194.25	191.2	281.7	103.66	194.47	123.11	152.22	11.39	87.2	-0.8572			TAL_FSA
TdChr001.718	336.34	496.44	604.36	334.08	278.72	170.05	276.6	377.39	54.24	380.63	49.33	80.78	96.25	155.62	92.64	67.22	79.94	74.77	56.19	292.12	115.7	4.98	87.18	-0.120503			Cpn60_TCP1
TdChr002.3056	119.54	391.47	95.9	88.82	173.86	97.31	88.5	38.52	113.55	27.3	55.34	106.96	145.66	154.23	89.62	65.85	138.52	191.72	259.38	37.94	173.99	1.6	86.87	-0.140327			Ras
TdChr004.1388	619.84	528.14	240.18	175.94	164.01	95.16	154	157.86	110.98	209.64	83.59	146.45	125.7	125.35	189.36	137.62	161.71	133.19	83.04	178.16	162.71	20.47	86.76	-1.13826			AAA
TdChr004.1387	790.06	618.94	241.91	151.41	144.42	119.65	155.34	207.44	42.55	254.94	60.45	138.24	90.85	135.91	99.31	77.01	111.57	82.81	65.99	341.6	99.4	30.65	86.74	-0.339244			RRM_1
TdChr002.682	797.07	236.58	309.26	187.35	249.54	187.44	272.33	327.16	87.42	389.27	107.45	208.38	173.8	213.14	168.33	134.88	217.04	142.23	149.12	159.83	105.03	2.46	86.55	-0.962669			RRM_1
TdChr002.2042	270.44	76.5	218.06	157.45	91.71	84.72	189.13	310.64	35.09	415.81	45.12	61.28	81.11	167.81	60.13	45.52	49.02	50.56	43.95	169.69	47.88	0.19	86.54	0.0459302			RRM_1
TdChr006.941	0	21.91	0.36	2.55	10.07	236.27	37.74	4.38	36.08	0.15	26.32	12.77	77.41	11.67	19.57	26.37	13.17	53.37	8.84	0.05	4.6	0.1	86.36	2.64501			MRJP
TdChr001.844	22.77	30.42	3.01	3.02	20.72	12.69	30.5	17.63	13.61	41.32	26.13	13.15	75.94	27.7	29.26	43.26	15.33	98.04	21.18	39.39	42.14	64.83	86.33	2.31677			NF
TdChr001.2360	0.37	57.43	33.54	104.26	65.35	14.68	6.15	2.29	18.96	0.87	1.36	14.79	3.88	7.31	37.38	0.61	16.02	3.77	11.89	0.23	7.1	0	86.25	3.22283			E1_dh,OxoGdeHyase_C,Transket_pyr
TdChr001.920	1000.36	524.07	335.07	220.28	276.03	283.07	248.93	273.02	74.42	370.52	119.46	167.12	226.19	240.55	275.76	283.3	308.78	276.29	240.81	238.55	86.17	1.76	86.1	-1.81649			RRM_1
TdChr004.1543	0.79	3.74	6.97	39.72	50.04	11.9	30.45	80.54	167.68	22.02	42.31	223.17	97.21	100.46	637.05	109.64	221.61	95.6	165.24	5.12	135.46	0.09	85.86	0.0512821			Cyt-b5,FA_desaturase
TdChr006.1668	291.8	157.54	284.92	207.14	241.34	93.61	158.21	213.62	26.86	225.85	26.79	69.54	46.69	93.36	24.64	25.51	39.09	19.81	23.4	84.12	17.28	0.11	85.86	0.0117478			AIRS,AIRS_C
TdChr004.685	62.67	63.26	319.84	177.11	112.62	172.95	264.43	365.77	50.36	598.37	36.59	117.29	105.38	249.05	52.1	48	111.15	46.92	83.36	309.38	53.86	0	85.82	-0.121473			Mito_morph_reg
TdChr004.1485	667.76	662.56	410	153.14	97.77	110.78	171.57	221.94	14.37	392.31	17.73	42.28	60.67	142.01	40	26.26	47.57	29.44	19.66	246.38	23.07	5.5	85.52	0.000591698			NTF2
TdChr005.1539	0.38	34.79	104.36	140.57	64.25	40.44	201.94	125.58	959	10.74	107.01	254.8	263.85	201.6	311.95	76.46	187.49	195.88	324.87	5.56	38.42	0.28	85.52	-0.131679			AMP-binding,AMP-binding_C
TdChr003.042	433.58	327.39	153.93	131.79	127.13	85.38	140.78	174.23	118.87	279	320.64	140.9	117.84	180.98	164.54	417.53	142.55	113.3	104.34	244.96	114.92	36.44	85.16	-0.575447			UPF0121
TdChr003.851	477.35	486.61	248.32	160.13	151.17	113.7	140.69	147.84	130.1	195.16	81.16	147.56	94.3	121.56	244.86	134.93	163.79	105.82	78.35	223.55	185.1	139.06	84.94	-0.861157			Proteasome
TdChr006.2125	10.77	9.49	1.23	3.33	11.09	2.66	15.84	8.68	21.22	1.58	10.75	4.03	11.28	17.42	14.11	1.54	3.95	6.88	26.94	1.53	9	13.52	84.9	7.34891			SSF
TdChr005.1485	206.61	301.28	145.44	124.6	115.73	251.49	287.38	129.09	192.95	162.83	105.17	218.69	189.06	345.34	139.6	168.17	302.03	306.06	436.44	180.65	412.97	1.25	84.9	-0.65003			NDUF_B12
TdChr006.516	47.27	116.3	81.82	75.28	16.99	10.51	22.72	27.64	33.91	18.83	27.08	29.02	51.64	20.71	75.09	46.86	28.52	52.09	29.96	21.9	105.72	0.31	84.41	1.31827			IF-2B
TdChr003.2200	61.27	35.68	39.73	75.12	63.2	72.29	67.21	83.9	74.89	60.58	15.57	12.84	16.68	32.33	17.35	7.02	6.71	7.74	16.14	27.43	6.19	0.39	84.38	1.02055			ANTH
TdChr001.3382	107.16	23.8	129.44	192.83	141.03	49.32	197.39	364.34	39.73	184.69	16.16	36.46	27.27	86.84	17.29	10.79	16.57	11.21	15.75	146.55	24.91	0.99	84.11	0.37566			-
TdChr002.1350	96.67	182.82	55.03	74.56	37.62	47.56	71.43	76.58	87.98	74.89	147	64.4	86.1	61.59	70.14	165.62	43.89	59.45	45.6	81.31	24.01	7.84	83.84	0.370392			bZIP_2
TdChr004.254	754.07	1341.37	1066.96	712.18	430.58	359.65	749.75	576.71	892.79	476.76	1090.38	751.52	1280.08	526.38	838.39	2059.48	711.13	1253.01	418.26	612.17	1443.31	21.17	83.76	-1.15366			Thioredoxin
TdChr006.1547	77.07	167.22	129.26	134.04	69.22	40.89	51.59	43.44	21.71	35.89	22.98	32.39	27.77	27.14	37.89	30.17	34.13	25.86	25.61	48.38	30.37	4.2	83.55	1.44508			SRP72,SRP_TPR_like,TPR_6,TPR_8
TdChr005.1817	94.37	101.7	76.93	41.11	46.03	43.94	64.23	68.17	56.32	70.82	35.24	79.12	95.87	217.55	64.22	44.86	86.64	110.77	382.43	86.23	86.33	1.99	83.54	0.170175			Aminotran_5
TdChr003.2248	345.93	228.31	412.54	121.23	57.94	99.05	206.94	177.36	3.47	240.08	8.21	10.03	45.72	73.99	21.94	13.59	13.35	11.2	10.83	113.54	11.66	0.42	83.43	0.185482			Fibrillarin
TdChr005.2047	1.89	4.04	15.08	83.67	1.2	93.92	4.34	1.98	0.88	2.57	0.29	1.09	1.24	1.21	1.08	0.61	1.19	0.53	1.44	2.14	0.65	0.21	83.35	33.901			Sulfotransfer_1
TdChr004.459	714.73	757.63	379.12	210.6	204.13	90.21	169.34	197.78	118.48	240.84	60.6	94.28	65.44	104.85	162.32	98.27	99.52	68.7	55.02	229.04	113.25	1.01	83.29	-0.247359			Proteasome
TdChr006.1649	389.75	169.78	166.2	145.96	169.4	112.8	140.29	141.9	175.41	57.81	41.97	79.34	42.75	46.54	34.58	11.15	11	8.39	36.98	54.97	2.73	0.09	83.11	0.234642			ERM,FERM_C,FERM_M,FERM_N
TdChr001.2564	1010.3	120.5	418.53	228.05	351.86	161.82	324.07	491.03	61.42	512.89	56.01	112.84	215.25	278.93	149.69	89.76	136.17	242.08	358.82	103.45	142.05	0	83.07	-0.342076			RRM_1
TdChr005.865	0.86	67.32	37.33	69.7	16.02	23.77	34.6	54.09	275.83	12.06	276.97	126.55	219.86	82.43	866.99	421.68	189.74	245.39	150.9	2.61	433.56	3.86	83.06	0.00358652			Cyt-b5
TdChr005.1176	540.73	119.27	619.21	340.88	472.58	238.99	475.48	742.48	71.8	1022.05	153.57	379.61	249.62	486.01	143.37	143.13	245.85	140.11	128.67	294.88	81.9	0.15	82.97	-0.479131			-
TdChr001.3041	191.02	224.94	122.45	100.76	98.21	197.25	262.59	86.92	114.62	108.15	58.18	123.65	105.05	145.41	54.36	53.61	113.22	119.92	131.93	103.07	189.48	0.88	82.78	-0.656639			CybS
TdChr002.2226	202.49	185.23	105.88	145.94	18.21	55.79	130.33	181.32	16.85	145.71	23.96	71.36	35.82	54.16	25.59	38.38	11.57	50.24	20.01	202.5	93.37	0	82.73	0.238564			Ribosomal_L34
TdChr005.1274	379.87	333.33	236.82	139.59	124.95	72.41	209.2	326.85	56.08	341.59	42.86	85.34	68.95	161.88	98.03	65.37	86.3	61.98	88.74	455.72	114.17	2.85	82.27	-0.102736			eIF-6
TdChr001.1115	0	0	0.79	8.5	0	0	1.78	0.13	7.23	0	0	6.1	0	0	3.84	0	9.41	0	1.4	0	0	0	82.24	28.2955			Pacifastin_I
TdChr003.2145	20.59	275.17	159.63	169.37	172.35	50.09	32.33	21.07	37.77	26.12	19.17	49.21	33.63	27.62	47.36	19.18	42.97	25.95	21.18	24.35	32.25	0.82	82.22	1.85251			DUF836,Thiolase_C,Thiolase_N
TdChr002.1956	1.81	120.52	156.03	563.08	235.17	50.8	27.34	4.93	40.48	0.6	0.23	63.67	2.87	11.34	16.6	0.65	79.97	3.32	29.99	0.11	1.74	0	81.64	0.928648			Aldedh
TdChr002.2971	271.37	274.75	163.59	240.25	47.31	20.62	76.68	90.64	32.01	93.07	10.15	30.61	19.67	40.39	19.72	13.5	41.3	18.83	22.47	120.5	22.13	1.5	81.54	0.574633			ADSL_C,Lyase_1
TdChr003.739	28.65	91.36	194.37	192.77	76.41	36.66	137.1	194.83	158.91	219.27	141.42	84.41	207.16	127.86	310.99	224.03	69.43	223.72	77.35	230.88	365.17	1.62	81.46	-0.447017			ADH_N_2,ADH_zinc_N
TdChr001.668	375.47	563.96	428.65	339.6	324.53	232.42	425.68	457.04	177.59	355.65	92.18	189.54	266.12	219.42	178.09	154.14	201.54	266.17	182.51	486.05	325.06	1.48	81.24	-0.996871			Prefoldin_2
TdChr004.255	20.09	217.28	115.88	269.9	146.21	69.81	77.06	70.53	174.63	63.57	193.96	208.15	173.57	138.52	220.57	338.05	193.11	253.82	194.57	105.04	313.04	13.23	81.2	-0.690205			Thioredoxin
TdChr003.1927	0.6	16.3	1.16	1.84	7.2	3.66	8.03	3.17	22.48	0.55	6.69	14.74	9.55	4.24	11.61	1.76	6.93	1.65	10.55	0.09	0.09	0.14	81.01	8.79017			MRJP
TdChr006.1866	13.74	6.69	24.26	25.75	38.24	13.82	38.62	49.35	50.48	37.05	4.02	12.99	6.76	15.03	2.15	1.54	0.96	1.14	3.14	36.19	1.06	0	80.62	1.96566			NAPRTase
TdChr002.905	353.76	227.51	286.66	197.7	94.71	66.82	170.54	257.65	31.89	249.64	21.49	39.99	42.04	118.49	25.73	16.85	19.73	19.76	30.42	236.67	14.36	0.82	80.54	0.073085			RRM_1,eIF2A
TdChr001.3083	1007.59	222.88	648.55	200.86	116.96	136.29	583.89	718.38	19.39	583.06	23.43	53.04	70.06	220.93	17	17.84	25.03	18.45	15.31	633.76	19.74	1.25	80.48	0.000260753			NF
TdChr002.1099	450.98	175.37	207.32	114.48	79.36	326.48	150.26	156.86	71.22	245.58	94.87	242.48	159.65	191.74	91.86	151.61	273.47	178.96	174.13	157.05	163.37	0	80.4	-0.833553			DUF543
TdChr005.2018	989.4	208.8	356.32	227.64	341.62	162.82	373.56	470.18	119.83	365.22	132.56	236.72	154.51	184.21	190.62	148.85	187.41	130.74	122.82	246	195.68	13.2	80.37	-0.718971			RRM_1
TdChr001.3519	382.53	256.07	147.18	127.71	159.44	173.59	216	226.72	286.79	271.36	126.96	550.81	204.07	259.69	250.15	169.73	649.8	201.26	306.23	117.55	175.88	16.48	80.37	-1.10048			Abhydrolase_2
TdChr001.2812	0	4.64	1.29	0.22	0	0	0	0	0	0	0	0	0	0	0	0	0	0	0	0	0	0	80.35	804.5			CLIP,Trypsin
TdChr004.1972	177.98	263.22	153.57	147.09	36.98	28.26	69	87.97	22.53	104.03	18.04	45.96	31.97	61.75	43.52	27.55	49.55	31.49	20.9	136.55	49.72	0.77	80.14	0.46342			Pribosyltran
TdChr002.2666	369.55	634.85	278.2	248.42	182.65	360.99	522.21	227.99	373.66	213.26	115.35	260.45	267.6	464.7	146.36	166.8	264.96	302.05	539.74	381.21	521.1	5.76	80.12	-1.04343			Ndufs5
TdChr006.036	419.42	296.08	147.22	69.5	33.91	13.9	89.71	152.04	9.6	220.79	5.69	8.01	17.07	58.52	7.61	3.99	9.69	8.56	4.27	220.52	11.49	0.38	80.03	0.571817			AICARFT_IMPCHas,MGS
TdChr006.344	0	0.67	0.59	25.73	6.25	9.21	17.43	8.53	51.04	0.54	130.37	35.13	228.21	15.08	46.54	180.31	44.52	227.41	17.5	0.38	32.1	0.02	80.01	1.37816			p450
TdChr001.2693	113.53	122.59	96.74	106.61	162.63	97.56	203.06	245.64	82.43	321.16	76.93	138.9	146.63	195.32	88.67	70.85	121.74	101.28	165.41	189.55	67.69	1.16	79.97	-0.425862			DnaJ,DnaJ_C
TdChr001.2963	0.96	24.94	41.55	24.75	26.39	41.28	36.79	26.15	159.67	8.79	29.41	101.46	102.34	54.38	262.43	28.12	159.1	118.46	99.6	1.61	510.84	4.21	79.94	0.506965			DUF4789
TdChr003.1861	151.87	187.42	150.02	137.55	68.79	52.59	108.43	117.41	58.26	125.82	37.06	48.29	50.13	69.62	72.67	61.17	51.5	44.71	47.19	173.27	40.58	63.64	79.82	0.156982			FKBP_C,TPR_1,TPR_2,TPR_8
TdChr006.316	390.72	178.29	230.19	222.91	346.09	245.17	209.95	215.53	181.18	184.58	107.06	290.82	208.95	175.05	212.53	165.71	263.84	178.9	200.7	69.59	172.56	0.53	79.77	-2.2865			Ras
TdChr005.1124	439.47	564.37	490.46	264.91	144.26	165.78	174.41	248.02	43.65	279.83	46.97	86.07	71.05	130.17	82.93	56.52	80.1	50.63	50.5	321.28	80.71	27.4	79.63	-0.0328872			Band_7
TdChr002.2968	118.7	160.27	185.08	210.9	266.86	179.89	953.06	197.61	480.09	77.75	170.78	331.69	1058.66	3282.2	138.87	109.41	207.26	610.06	4178.52	57.71	413.32	0.09	79.62	-0.3707			Aconitase,Aconitase_C
TdChr001.924	363.88	292.63	598.27	355.48	300.4	47.33	249.27	374.64	30.73	332.87	33.66	36.98	47.52	79.79	60.13	45.07	49.95	37.36	21.6	485.27	70.4	6.07	79.61	0.0337907			LSM
TdChr002.2652	109.75	223.17	287.57	218.16	161.6	147.92	204.68	212.21	99.63	158.99	59.34	119.18	108.78	89.98	114.57	92.93	133.25	105.65	86.93	318.03	233.19	0	79.56	-0.352024			MRP-63
TdChr002.393	541.14	698.21	710.58	367.23	285.65	165.66	243.66	313.78	55.1	341.32	66.47	104.61	117.17	153.22	98.92	83.14	95.07	86.49	57.83	259.16	107.13	4.85	79.54	-0.174558			Cpn60_TCP1
TdChr004.1200	862.07	685.64	201.86	163.48	110.98	102.89	204.71	281.93	59.99	361.4	46.01	110.76	105.47	174.92	64.58	55.32	90.65	91.11	83.97	350.94	88.19	43.33	79.29	-0.214201			eRF1_1,eRF1_2,eRF1_3
TdChr001.1621	501.19	636	135.89	115.64	70.16	351.98	222.76	58.61	86.47	43.98	106.24	158.4	66.1	135.24	66.16	42.43	115.32	133.43	243.62	93.67	273.6	0	78.95	-0.296033			WRW
TdChr001.2525	395.51	519.08	403.97	253.68	205.29	65.98	203.45	269.84	140.04	252.91	64.32	77.33	81.14	115.52	192.99	120.52	94.49	71.73	43.98	240.94	129.77	55.5	78.85	-0.300826			Proteasome,Proteasome_A_N
TdChr002.341	439.67	559.9	397.77	246.19	195.83	261.73	250.18	231.24	72.16	221.12	64.07	149.65	131.44	160.77	118.18	71.22	147.93	109.52	130.88	214.28	124.78	6.62	78.76	-0.566479			GTP_EFTU,GTP_EFTU_D2,GTP_EFTU_D3
TdChr005.1828	1.37	0.97	0.72	17.97	2.3	7.99	52.19	45.74	314.86	19.81	17.77	263.25	41.06	75.77	294.07	5.65	106.83	45.99	128.48	4.87	232.89	0	78.64	0.43026			COesterase
TdChr003.567	69.99	123.35	145.52	183.69	190.5	110.55	218.18	107.1	588.47	52.19	76.27	229.62	124.61	111.29	490.28	102.78	312.7	135.78	210.72	36.25	114.39	1.37	78.61	-0.405763			Acyl-CoA_dh_1,Acyl-CoA_dh_M,Acyl-CoA_dh_N
TdChr001.2831	377.39	240.46	119.08	83.12	49.06	40.99	97.38	144.66	12.14	177.42	13.9	13.71	25.25	66.44	19.18	13.56	18.32	10.99	7.91	182.5	16.59	12.07	78.6	0.398942			Seryl_tRNA_N,tRNA-synt_2b
TdChr002.2062	174.12	468.23	263.78	226.61	180.44	123.29	183.6	126.11	321	93.67	108.06	251.75	171.68	182.51	255.57	161.75	265.03	177.96	220.8	103.71	227.21	9.3	78.53	-0.886229			Thiolase_C,Thiolase_N
TdChr002.784	245.53	272.45	135.7	147.92	92.02	110.96	92.09	111.48	87.15	127.19	72.97	138.16	107.91	101.59	171.07	107.06	123	109.93	87.55	117.2	128.23	3.32	78.39	-0.811547			Pex14_N
TdChr003.992	20.43	33.61	55.88	167.78	46.27	79.77	101.38	56.99	212.97	33.4	49.25	344.7	109.18	141.6	212.02	64.03	258	78.06	175.26	34.08	132.22	2.29	77.9	-0.00056059			Alpha-amylase,Alpha-amylase_C,CBM_48
TdChr001.700	344.43	222.64	253.84	234.59	256.96	175.56	349.15	537.32	95.49	679.5	121.64	138.35	187.82	324.14	180.63	172.34	176.87	156.83	139.45	807.34	162.34	2.97	77.89	-0.72023			Ras
TdChr002.737	30.52	81.31	38.18	17.47	21.84	26.46	30.44	37.46	35.41	50.61	21.19	92.04	35.87	47.65	89.16	26.16	133.03	38.76	47.22	54.2	66.92	2.98	77.69	1.22974			AP_endonuc_2
TdChr002.1670	639.88	673.47	184.79	124.09	75.61	84.33	176.15	203.1	31.89	232.42	41.87	58.97	61.82	102.77	60.76	48.76	62.56	58.6	35.9	344.22	101.08	103.91	77.69	-0.0541817			GrpE
TdChr006.1696	2.68	260.15	59	51.65	13.97	32.84	11.8	2.61	13.67	0.9	2.19	17.22	22.47	5.78	28.94	2.95	26.85	20.34	13.58	0.38	8.75	0	77.66	2.54527			2-oxoacid_dh,Biotin_lipoyl,E3_binding
TdChr002.2839	5.92	0	4.94	3.3	0	0	0	0	2.47	0	0	0	0	0	0	0	0	0	0	0	0	0	77.32	774.2			CENP-T_C,Histone
TdChr005.2118	77.11	105.45	22.68	54.9	38.02	19.56	29.99	35.88	29.22	60.48	24.96	103.23	25.09	46.45	16.44	36.03	98.11	28.7	40.69	61.73	24.16	2.8	77.32	1.144			PAP2
TdChr004.1135	266.78	224.88	153.67	128.8	109.14	127.38	151.23	131.82	76.08	163.22	51.12	118.95	79.25	113.82	80.54	57.06	111.86	80.32	88.99	153.21	113.84	11.89	77.17	-0.591041			Ribosomal_L3
TdChr002.230	77.15	52.77	5.26	1.64	0	0	0.07	0	0	0	0.58	0	0	0	0	0.1	0	0	0	0	0	0	76.78	174.727			NF
TdChr005.652	935.84	341.05	342.99	193.99	214.13	123.79	470.89	807.9	109.34	828.82	94.11	142.18	142.96	352.02	85.39	110.13	178.74	103.02	150.62	983.54	121.3	0	76.75	-0.310127			BTB
TdChr002.1042	974.07	620.59	210.78	145.52	164.61	142.45	212.48	235.09	97.58	404.75	71.33	139.01	111.52	194.54	96.82	95.72	112.87	90.07	96	217.58	83.59	69.64	76.42	-0.539311			UQ_con
TdChr006.1137	115.52	154.33	76.02	126.48	69.5	45.28	60.85	63.61	50.74	68.55	13.36	66.38	32.44	42.89	66.78	16.87	69.04	35.06	32.28	89.13	33.43	6.44	76.4	0.333808			Mtc
TdChr003.1263	425.83	575.57	263.51	224.33	257.36	388.73	443.85	226.54	216.15	277.81	127.24	341.39	245.06	292.19	142.16	171.59	391.78	233.09	273.5	418.91	394.94	146.5	76.35	-1.09961			NDUF_B8
TdChr002.2708	290.14	210.81	266.68	185.19	244.57	111.71	214.75	260.69	130.11	271.76	57.59	198.13	115.36	156.24	178.98	94.74	244.7	127.75	120.25	217.01	130.06	8.99	76.25	-0.907547			PCI
TdChr005.501	763.98	313.24	25.16	26.74	34.64	23.16	282.32	478.21	44.6	839.36	36.47	90.04	94.85	315.85	39.91	64.04	84.5	73.63	65.52	1097.98	51.66	83.03	76.11	0.000391198			bZIP_2
TdChr001.3515	303.49	275.36	318.79	196.33	161.1	98.35	177.53	215.39	138.08	246.44	68.87	83.73	83.38	121.55	203.63	121.78	111.92	95.51	58.85	181.55	131.37	5.9	76.09	-0.499547			Proteasome,Proteasome_A_N
TdChr002.395	148.9	140.43	185.03	156.44	101.09	61.87	111.03	115.31	127.52	138.53	96.72	214.4	126.14	135.17	162.72	163.5	229.43	133.36	131.17	113.87	174.15	41.99	75.87	-1.21512			-
TdChr003.2176	366.68	193.72	95.11	130.13	85.48	93.05	88.01	103.11	62.32	134.32	26.16	57.73	48.39	90.81	107.83	30.54	99.49	37.97	29.13	138.54	60.15	16.05	75.83	-0.230051			Rab5ip
TdChr003.535	59.52	104.76	107.44	136.12	190.35	119.52	127.92	120.74	145.27	127.33	99.15	161.54	126.98	86.68	235.32	195.43	193.07	141.05	97.07	162.56	231.3	262.93	75.82	-0.73806			Selenoprotein_S
TdChr002.320	551.3	332.47	629.17	363.02	261.55	101.32	312.12	405.39	32.01	315.18	35.69	28.08	56.39	108.62	50.21	35.27	43.71	35.3	22.43	607.82	50.61	9.98	75.75	0.000346705			LSM
TdChr006.501	355.65	402.13	289.58	225.7	176.29	72.2	156.79	183.86	89.92	218.37	45.48	74.42	64.4	99.34	116.1	75.06	95.82	63.25	40.67	199.35	92.24	19.2	75.73	-0.168842			PCI,RPN7
TdChr001.2410	108.18	175.02	248.5	421.28	352.48	87.56	113.65	192.68	24.61	274.74	23.28	36.45	38.08	106.01	39.88	29.61	34.9	27.21	17.14	352.92	25.23	1.35	75.72	0.000642921			Peptidase_M49
TdChr002.2498	105.08	40.13	93.93	95.85	160.81	34.32	95.82	166.14	77.17	103.48	24.18	41.2	29.71	54.84	27.73	16.81	8.41	13.24	14.51	99.98	5.52	0.04	75.54	0.456522			SH2,STAT_alpha,STAT_bind,STAT_int
TdChr002.797	35.12	142.13	101.93	106.44	589.03	402.34	130.45	102.24	640.59	72.05	180.77	1290.54	854.86	1028.4	942.87	529.59	2034.91	1312.42	1632.97	0	2525.48	0	75.43	-0.369841			NF
TdChr004.273	58.12	20.05	0.91	30.9	1.67	6.08	75.3	132.84	0.75	181.2	2.32	4.54	15.52	82.93	3.23	1.39	11.08	4.09	3.2	202.96	11.77	5.11	75.25	1.01101			Geminin
TdChr005.1239	0.66	19.07	9.95	14.72	2.74	4.84	12.71	10.91	42.75	1.22	1.87	54.65	4.66	21.76	54.56	2.39	106.22	5.99	56.37	1.57	15.75	0	75.23	2.16247			CBM39,Glyco_hydro_16
TdChr006.1507	0.46	4.12	1.26	11.3	8.2	60.54	43.72	14.18	116.48	0.77	11.9	33.66	52.44	64.97	102.61	21.07	39.34	88.67	112.06	0.08	38.78	0.22	75.2	0.734456			SGL
TdChr003.779	27.21	41.53	2.69	10.5	23.25	92.33	30.38	12.92	74.64	10.13	37.69	54.26	50.72	34.65	44.6	264.5	28.19	34.36	30.39	11.12	9.21	0	75.16	1.25546			MIP
TdChr003.064	89.68	137.51	84.65	101.48	170.97	86.08	145.77	178.85	131.04	176.7	77.87	175.98	124.92	127.15	113.48	112.84	161.74	125.27	112.98	205.59	106.78	10.26	74.94	-0.855942			SNARE,Syntaxin_2
TdChr005.666	1.28	1.98	11.28	56.72	32.89	11.01	28.92	40.69	220.11	23.03	413.61	81.28	34.75	65.54	692.82	1202.98	54.13	32.56	47.32	4.74	267.18	0.04	74.85	0.561547			Aldedh
TdChr006.1631	285.39	105.16	410.49	151.34	206.97	151.82	379.32	552.99	59.33	455.68	43.31	81.97	91.34	191.05	69.93	37.96	39.86	35.7	48.33	147.26	32.25	0.03	74.82	-0.107117			NTF2,RRM_1
TdChr004.2192	28.75	11.16	39.71	45.34	180.51	25.51	22.78	21.57	110.6	4.54	7.52	100.15	34.12	49.23	105.22	5.73	58.37	17.81	69.79	1	34.34	0	74.74	0.819398			zf-C2H2
TdChr006.1024	12.76	112.67	12.4	29.7	2.33	1.24	1.85	1.15	6.32	1.79	3.38	8.59	4.76	3.82	23.12	6.27	1.94	2.14	7.97	0.35	11.56	0	74.52	6.85911			NF
TdChr005.1238	55.56	82.3	49.13	27.87	19.58	27.92	30.72	34.75	12.43	45.79	12.08	15.57	21.52	18.74	11.37	10.78	20.96	13.06	8.66	65.05	19.28	15.07	74.47	2.03802			Frataxin_Cyay
TdChr003.816	233.9	269.76	400.11	249.79	212.76	113.72	184.22	222.89	40.87	217.47	25.54	56.71	47	91.49	57.84	44.17	55.07	35.16	27.56	184.38	37.48	1	74.38	0.000579056			FKBP_C,TPR_1,TPR_2,TPR_8
TdChr002.2420	675.39	775.47	574.96	309.9	229.89	152.75	268.85	356.49	43.25	392.28	51.97	75.71	84.46	168.2	62.45	50.24	75.27	60.74	47.07	353.15	85.86	6.95	74.28	-0.0425138			Cpn60_TCP1
TdChr005.1150	3170.34	1528.07	983.89	508.69	480.99	168.29	544.82	784.12	27.04	839.47	55.35	60.73	100.44	272.64	53.49	51.16	46.22	42.91	29.69	1112.83	86.26	5.9	74.23	-0.0426463			DZF
TdChr006.464	697.92	633.42	529.58	310.29	240.43	178.13	252.67	335.03	44.01	395.12	57.48	85.82	98.96	167.87	91.65	65.79	87.63	63.85	51.23	277.15	84.08	3.33	74.15	-0.110386			Cpn60_TCP1
TdChr001.3222	5.51	89.5	39.39	52.15	292.82	107.93	245.28	99.59	321.96	48.59	87.85	290.5	1448.45	1101.1	332.61	111.21	327.32	1252.74	1930.3	26.15	594.03	0.84	73.94	-0.139203			bZIP_1,bZIP_Maf
TdChr002.1233	52.48	245.45	129.59	149.36	60.56	37.09	62.58	59.03	47.35	67.5	17.99	68.96	25.24	42.52	76.07	22.16	50.56	18.44	31.28	66.28	32.02	2.52	73.87	0.585878			ADH_N,ADH_zinc_N
TdChr002.2514	31.42	6.26	205.64	170.08	123.93	90.93	264.59	383.25	48.7	220.18	8.87	16.27	22.9	83.2	9.68	4.75	3.14	5.95	6.63	216.78	2.82	0.12	73.78	0.301863			GTP_EFTU,GTP_EFTU_D2,GTP_EFTU_D3,PAM2
TdChr004.424	189.6	76.95	373.98	321.48	582.89	218.97	548.51	685.43	182.43	456.84	99.1	314.28	152.64	269.45	124.11	88.57	191.77	80.31	144.24	204.82	71.94	4.03	73.65	-0.516853			NF
TdChr002.2351	428.3	247.42	231.33	260.55	185.53	94.14	244.24	226.15	298.61	279.91	184.65	179.07	202.23	191.29	235.3	245.19	204.36	196.5	129.88	200.41	154.66	51.52	73.63	-2.04114			TB2_DP1_HVA22
TdChr004.828	562.09	625.6	253.98	185.55	229.35	211.75	218.73	210.73	90.56	306.01	101.26	162.98	162.83	194.54	132.33	139.84	151.99	174.37	134.22	333.2	323.96	3.68	73.4	-1.06984			Mago_nashi
TdChr002.1299	132.35	253.46	345.8	180.99	153.96	90.83	160.77	217.19	46.93	236.63	47.38	99.48	84.41	127.68	101.35	70.34	92.85	74.55	48.94	350.32	211.21	6.73	73.08	-0.230175			Ribosomal_L6e,Ribosomal_L6e_N
TdChr001.1047	79.86	67.3	74.99	52.56	25.88	22.87	38.1	60.62	11.36	57.99	8.96	17.71	14.8	29.03	12.73	9.92	13.36	11.16	12.54	58.21	13.08	1.33	72.98	1.10194			Anticodon_1,tRNA-synt_1
TdChr003.219	86.23	525.76	288.29	407.5	157.6	78.9	108.04	94.75	53.01	94.89	33.65	50.43	46.12	54.24	94.8	46.91	59.09	42.32	38.82	113.2	59.76	3.24	72.86	0.00189054			M20_dimer,Peptidase_M20
TdChr005.583	22.61	101.58	88.51	76.43	37.85	31.72	32.11	33.07	21.15	44.79	20.74	41.4	37.65	30.27	62.08	32.91	53.31	39.17	31.17	38.15	58.96	7.18	72.57	1.4046			Esterase
TdChr004.754	486.75	455.45	185.87	192.27	281.23	356.02	174.25	177.73	218.66	325.55	380.19	455.42	543.3	364.37	512.01	575.66	549.84	601.31	435.83	216.88	340.64	60.96	72.5	-1.06299			Synaptobrevin
TdChr006.576	45.01	129.3	223.26	214.75	305.37	328.09	351.21	415.16	145.79	552.79	201.45	227.06	241.82	321	281.62	343.78	351.37	282.8	210.74	759.92	283.55	34.1	72.26	-1.61044			TFIID-18kDa
TdChr003.1434	291.92	263.3	176.59	121.21	80.57	172.28	173.07	170.28	45.98	194.97	36.28	83.75	83.94	126.07	64.42	49.22	105.73	63.08	82.03	201.28	103.65	38.48	72.23	-0.299856			Cyto_heme_lyase
TdChr001.2516	0.54	13.83	0.8	3.72	4.78	2.1	20.14	4.05	32.49	0	19.33	24.54	70.04	16.42	10.62	84.31	29.3	66.46	32.06	0	38.63	0	72.07	1.89208			Ninjurin
TdChr003.772	521.03	166.71	632.33	315.93	463.92	236.59	485.09	628.65	60.87	763.88	92.93	219.63	172.27	357.51	88.92	68.99	100.31	58.35	70.31	505.3	40.66	0	72.02	-0.24824			KH_1,Qua1,Sam68-YY
TdChr006.008	36.64	63.25	116.59	249.13	301.33	101.42	164.91	88.81	275.79	67.58	136.51	173.06	142.1	107.69	241.33	216.5	190.73	137.01	132.58	75.03	109.46	0.64	71.93	-0.605046			SCP2,adh_short
TdChr002.2822	133.46	156.24	161.61	157.89	93.28	56.45	105.61	125.26	37.31	119.39	26.4	42.99	44.28	60.38	48.52	37.02	44.92	36.55	36.65	170.99	43.57	4.35	71.87	0.188636			SRP68
TdChr001.3069	0.2	16.21	0.68	0.11	0	0	0.31	0	0	0.07	0	0	0	0	0	0	0	0	0	0.05	0	0	71.77	378.263			NF
TdChr002.849	104.72	98.91	69.81	85.18	51.11	20.62	25.28	30.55	7.67	43.69	3.7	8.69	6.29	15.35	6.37	3.4	10.99	4.13	4.4	35.77	4.78	0	71.77	1.34684			Glucosamine_iso
TdChr006.455	0.33	62.91	55.29	111.01	12.6	26.05	1.67	0.06	1.5	0.03	0.02	4.69	1.07	1.1	7.84	0.13	4.69	0.46	4.23	0	0.11	0	71.73	6.8951			AlaDh_PNT_C,AlaDh_PNT_N,Sacchrp_dh_C,Sacchrp_dh_NADP
TdChr006.002	0	0.4	0.15	37.31	27.62	1.59	8.37	8.01	43.84	0.95	0.16	28.78	4.73	47.13	24.38	0.1	14.72	3.75	79.86	0.12	1.46	28.82	71.7	2.26005			Sulfatase
TdChr005.249	241.14	125.41	59.05	94.41	70.08	37.46	121.5	183.54	40.67	179.46	31.4	44.77	48.44	85.94	24.19	34.19	34.94	32.04	25.58	258.26	76.51	0.18	71.63	0.17254			DUF1180
TdChr001.1542	223.78	194.75	158.71	166.23	114.88	85.12	148.93	207.21	38.48	188.01	24.82	50.14	45.21	96.88	37.32	26.49	39.67	34.18	38.74	183.26	33.16	4.67	71.46	0.000802118			PCI
TdChr002.998	155.76	167.88	163.03	90.39	240.86	355.61	227.57	166.92	275.02	106.22	136.12	367.45	224.36	421.36	283.57	236.61	411	298.27	323.28	263.81	348.87	19.62	71.11	-1.09189			Pet100
TdChr002.3545	1.46	71.29	53.42	74	35.54	40.84	51.97	26.06	203.84	26.03	0.65	0.32	0.82	18.98	949.32	0.52	1.67	3.02	2.79	6.27	2.18	0	71.02	1.01776			AMP-binding,AMP-binding_C
TdChr005.1659	46.51	4288.74	5656.64	9506.17	3.73	45.23	7.43	0.15	5.3	0	0.57	3.44	0.44	0.57	0.35	0.99	1.08	1.09	0.4	0	0.33	0	70.63	2.67319			Trypsin
TdChr001.2914	74.35	253.13	100.7	147.82	187.17	65.29	103.39	57.93	111.11	54.01	61.24	114.92	89.86	97.46	232.38	93.99	108.53	104.16	124.04	63.05	202.26	2.8	70.46	-0.582922			Acyltransf_C,Acyltransferase
TdChr005.639	1059.02	1104.05	624.6	324.49	232	153.35	246.96	330.57	45.45	380.77	49.54	74.1	90.05	158.4	71.3	62.72	67.97	58.27	40.8	313.04	94.64	2.6	70.34	-0.095456			Cpn60_TCP1
TdChr002.1203	187.25	174.34	85.31	117.86	80.79	59.18	85.21	100.07	53.03	130.09	49.85	73.93	64.06	76.82	56.76	65.27	80.09	77.09	48.98	171.65	93.68	78.02	69.91	-0.247911			Coatomer_E
TdChr006.473	0.8	3.73	16.14	33.47	10.02	11.36	12.47	9.62	53.19	1.9	10.82	14.17	16.04	11.51	17.61	10.87	12.63	13.36	14.28	2.38	70.33	2.3	69.7	9			CDK2AP
TdChr004.1911	130.33	78.35	101.19	79.83	69.23	183.02	220.96	119.29	56.4	127.18	32.31	47.69	128.9	116.21	22.05	39.19	41.63	128.09	127.14	78.22	78.34	0.92	69.67	-0.114073			FAD_binding_2,Succ_DH_flav_C
TdChr002.655	213.73	304.92	229.47	157.05	75.72	286.22	300.99	140.03	112.09	184.86	55.26	158.53	84.16	214.46	53.32	31.52	79.1	33.15	82.09	171.82	83.95	14.3	69.67	-0.334017			UCR_hinge
TdChr002.3039	550.85	177.51	242.49	172.81	135	96.98	263.73	478.53	62.6	560.75	38.65	106.11	84.87	214.84	75.46	39.25	71.99	46.14	67.23	421.73	22.73	0.88	69.63	-0.166311			UBA,XPC-binding,ubiquitin
TdChr001.2873	370.95	72.26	54.78	74.99	72.67	47.35	64.52	67.95	61.32	63.32	52.2	57.73	55.03	49.54	67.59	62.57	43.85	45.07	50.8	33.74	26.25	12.95	69.51	0.611583			zf-RING_2
TdChr005.1354	217.25	211.93	207.26	173.94	162.51	71.72	154.87	175.38	96.57	212.71	54.04	93.98	80.38	105.91	107.61	91.69	104.66	81.4	54.42	188.93	77.54	29.44	69.42	-0.366806			JAB,MitMem_reg
TdChr003.1553	23.91	37.01	19.57	40.59	18.51	8.53	23.79	24.04	27.86	21.07	13.87	18.04	11.47	14.22	15.12	10.34	9.49	8.07	14.45	31.3	3.5	0	69.32	3.90129			Fer4_12,MoaC,Mob_synth_C,Radical_SAM
TdChr005.1381	30.02	82.99	122.24	205.31	87.86	28.75	48.24	55.62	20.94	55.04	18.54	29.89	22.34	27.36	32.42	21.92	26.74	15	16.29	59.66	33.04	19.14	69.18	1.1025			Leuk-A4-hydro_C,Peptidase_M1
TdChr002.2424	112.4	87.34	103.49	129.65	89.94	68.62	84.62	118.21	46.03	110.46	32.97	54.87	55.79	68.9	58.45	42.9	61.51	49.41	52.49	85.88	51.34	2.45	69.13	0.0165648			SRP54,SRP54_N,SRP_SPB
TdChr005.717	384.72	171.83	79.64	153.55	95.9	85.2	105.77	98.44	103.69	105.14	100.61	165.13	119.41	105.43	141.91	145.42	176.64	136.89	112.26	119.45	129.76	374.44	68.97	-1.06124			PRKCSH
TdChr006.1795	213.28	122.09	125.46	112.88	125.99	60.25	129.22	188.15	43.69	196.44	49.9	33.68	45.36	68.15	48.65	50.19	36.46	40.95	36.11	113.65	37.09	10.14	68.79	0.105941			Ras
TdChr004.858	131.33	165.75	51.52	93.05	65.79	84.94	89.17	60.12	60.17	60.42	33.91	110.03	43.02	65.3	60.51	40.28	100.14	45.06	65.92	68.48	80.73	0.82	68.53	0.0906335			Carn_acyltransf
TdChr001.2759	4.84	70.42	44.17	225.36	955.3	520.53	226.76	154.38	1162.99	23.03	347.99	2150.14	1704.54	1484.75	1369.26	684.27	2423.9	1871.67	2911.99	17.71	1901.84	0	68.51	-0.296287			NF
TdChr002.3067	0.29	3.3	0.15	0	0	0.28	0	0	0	0	0	0	0.11	0	0	0.08	0	0	0	0	0	0	68.26	350.564			PI-PLC-X
TdChr004.199	330.11	289.05	232.94	185	168.92	78.18	161.14	175.85	127.58	187.01	80.95	151.16	103.8	119.39	170.41	131.23	172.82	117.46	93.3	154.05	151.27	9.25	68.19	-1.30053			PCI,Rpn3_C
TdChr002.231	167.58	65.52	117.01	123.62	84.83	48.45	93.69	134.45	56.09	114.48	49.19	72.88	57.85	70.61	54.46	58.96	63.68	48.79	56.28	88.6	43.59	0.62	68.15	0.0758966			Adaptin_N,Coatamer_beta_C,Coatomer_b_Cpla
TdChr001.246	178.97	125.46	98.58	88.83	89	184.45	259.56	107.11	132.13	96.82	41.76	82.23	105.85	392.43	58.74	39.02	77.09	96.08	549.43	60.8	135.8	2.34	67.94	-0.467587			dNK
TdChr004.049	1349.22	226.42	500.95	231.26	406.94	224.46	359.98	354.43	65.15	356.31	63.28	200.7	199.61	203.89	120.56	92.53	156.39	160.38	132.62	133.26	117.45	1.64	67.93	-0.756468			FYTT,FoP_duplication,RRM_1
TdChr002.306	73.5	25.59	80.8	82.37	185.73	77.78	110.12	90.39	108.99	51.82	28.82	37.31	21.86	35.14	17.89	27.66	14.43	9.43	31.54	33.86	5.04	0.24	67.82	0.58888			NPC1_N,Patched,Sterol-sensing
TdChr001.597	126.77	205.94	127.45	118.65	90.26	281.91	271.41	104.58	211.44	72.16	92.14	92.22	134.34	162.12	177.26	144.7	191.17	185.2	162.72	118.39	411.93	8.51	67.67	-0.740613			NF
TdChr004.961	179.34	236.58	144.04	155.96	168.69	144.15	190.61	216.34	145.79	198.13	119.93	186.56	128.36	156.18	151.94	201.54	212.25	152.21	142.22	318.28	198.89	38.33	67.65	-1.62212			DDRGK
TdChr005.1994	28.36	183.35	59.68	132.41	68.21	26.68	20.68	18.77	41.42	14.73	18.16	47.78	38.13	37.1	72.53	16.23	42.23	27.59	36.02	15.3	35.32	1.25	67.48	0.925378			Acyl-CoA_dh_1,Acyl-CoA_dh_M,Acyl-CoA_dh_N
TdChr001.1124	105.91	100.49	25.82	19.51	53.3	49.21	72.23	59.98	82.2	8.92	9.75	62.02	16.97	24.95	8.74	1.72	3.7	2.42	23.33	14.9	1.94	0.07	67.42	0.845418			PH_3,Pkinase
TdChr006.2119	162.85	96.26	57.07	81.9	31.33	23.01	34.58	34.19	32.59	37.41	26.25	31.76	29.01	32.69	32.44	35.14	37.24	30.5	29.94	49.8	25.39	27	67.38	2.5799			Hexapep,NTP_transferase
TdChr005.1650	48.97	395.16	238.23	342.79	365.52	76.03	156.97	49.19	334.21	20.9	69.89	140.99	79.11	56.99	327.76	104.06	237.42	89.64	97.19	14.31	97.5	3.38	67.36	-0.169161			Thiolase_C,Thiolase_N
TdChr002.2136	279.47	263.03	247.6	156.36	103.66	72.49	109.21	133.26	32.77	168.61	33.24	55.02	57.71	90.17	48.91	41.17	57.84	52.59	54.65	163.04	57.34	13.84	67.15	0.00109541			Chromo,GTP_EFTU,GTP_EFTU_D2,Pre-SET,SET,eIF2_C
TdChr004.1558	0	0	0.37	1.73	0.28	0	0.14	0.06	0.21	0	0	0	0	0	1.85	0	0	0	0	0	0	0	67.13	244.473			COesterase
TdChr002.2649	190.06	554.94	226.1	167.99	165.75	80.89	64.05	23.72	134.55	8.43	86.6	146.12	114.02	66.29	184.56	144.98	183.77	148.99	105.65	9.02	150.24	35.66	67.07	-0.671852			AAA
TdChr001.2776	18.96	236.44	23.89	119.34	565.12	313.33	137.39	83.45	682.07	15.17	151.94	1043.21	546.86	607.63	442.13	193.15	684.15	423.61	1057.29	10.53	335.19	103.7	66.46	-0.367296			NF
TdChr006.1061	349.85	451.57	221.94	166.25	278.15	131.48	191.04	225.16	152.89	242.31	106.98	407.81	262.17	266.51	130.98	112.7	289.72	214.16	297.7	196.69	175.53	2.64	66.36	-1.13402			-
TdChr002.2271	0	0	0	1.18	21.75	7.19	4.16	4.62	5.91	2.85	3.24	21.63	14.07	12.11	6.47	53.52	42.38	15.81	48.2	2.65	10.03	0	66.05	3.71375			NF
TdChr005.749	4.44	94.36	55.31	66.82	43.88	20.48	18.02	6.6	43.51	2.39	12.97	11.44	29.46	19.38	30.01	9.1	11.29	23.1	23.47	4.57	11.69	0	65.98	1.75136			Aminotran_1_2
TdChr002.3270	0	0	0.17	0.95	0.13	0.08	22.86	27.84	133.65	11.29	121.89	126.86	52.44	51.89	304.15	314.78	179.34	82.22	119.85	1.09	80.59	0.88	65.91	0.117613			p450
TdChr002.2736	373.08	394.88	554.4	298.48	246.09	145.88	196.67	256.53	38.75	280.53	35.7	57.38	66.97	113.26	63.23	44.29	58.03	48.84	38.98	237.56	57.88	2.91	65.82	-0.00529501			Cpn60_TCP1
TdChr002.2024	238.76	319.1	179.75	147.05	124.9	157.45	171.56	91.92	96.57	97.67	63.83	127.72	89.69	136.92	62.66	94.81	168.69	108.99	172.96	146.73	199.62	10.88	65.79	-0.80445			QIL1
TdChr002.818	10.82	10.99	8.51	0	0	0	0	0	0	0	0	0	0	0	0	0	0	0	0	0	0	0	65.76	658.6			NF
TdChr005.1840	10.62	5.3	21.48	27.29	232.59	32.57	25.39	8.71	28.54	1	1.88	14.38	13.06	13.27	3.85	0.34	0.53	1.04	12.72	4.46	0.35	0	65.67	2.4983			Vert_IL3-reg_TF,bZIP_2
TdChr005.1774	252.76	190.1	199.89	160.25	145.24	95.35	148.76	184.92	95.68	240.39	65.82	124.73	107.89	139.83	155.49	100.71	141.68	108.1	77.23	187.82	108.77	4.5	65.6	-0.995167			AAA
TdChr002.497	848.17	138.36	381.13	228.75	442.01	159.35	342.81	471.85	148.31	395.01	47.85	266.24	135.62	260.9	49.99	30.18	57.58	40.23	117.13	137.11	32.45	1.17	65.49	-0.290105			HMG_box,HMG_box_2
TdChr001.1188	0	0.31	0.81	0.05	0	0	0.05	0	0	0	0	0	0	0	0.08	0.07	0	0	0.09	0.12	0.11	0	65.38	353.946			NF
TdChr001.2741	405.02	57.85	176.3	108.39	165.36	121.21	251.13	347.86	81.93	212.25	40.29	100.24	100.15	201.51	49.46	21.03	32.33	29.52	164.82	126.26	9.85	0.11	65.38	-0.275753			RRM_1
TdChr006.294	209.77	32.49	40.6	71.68	180.65	100.51	174.24	148.25	547.53	196.36	293.52	18.3	49.91	70.37	1072.55	545.64	8.94	47.32	12.92	157.58	198.42	4.34	65.33	-0.22849			CRAL_TRIO
TdChr003.937	195.75	74.07	109.62	99.29	86.17	55.82	87.81	120.36	44.4	119.07	43.91	62.15	52.27	69.49	46.46	49.16	50.42	41.04	43.45	84.2	33.34	1.21	65.17	0.074892			Coatomer_WDAD,WD40
TdChr002.2752	2.16	24.45	9.48	18.23	14.08	19.56	9.99	3.99	21.21	2.26	15.74	18.99	12.11	5.84	24.67	23.13	21.95	21.79	13.29	5.69	7.78	2.35	65.05	3.45301			Aminotran_5,MOSC,MOSC_N
TdChr006.458	301.23	157.56	76.11	77.47	125.76	59.3	93.26	102.01	67.88	83.45	45.56	97.51	70.74	67.72	28.19	23.94	26.55	21.52	60.18	43.64	9.22	0.11	65.04	-0.0491054			MFS_1
TdChr001.3338	6.61	2.73	8.27	9.14	65.11	24.03	12.64	13.16	86.73	2.51	30.58	59.6	40.15	96.6	64.32	63.02	32.78	19.05	83.94	0.93	88.79	0	64.96	0.61533			p450
TdChr001.2519	9.95	257.74	45.28	69.34	44.91	36.33	23.39	9.68	25.05	0.94	3.54	26.14	11.71	9.3	46.24	3.78	43.62	13.58	35.98	11.73	7.66	0.24	64.88	1.19254			E1_dh
TdChr001.3562	130.09	24.66	50.74	42.09	133.24	71.76	148.01	212.32	105.02	251.93	76.23	214.19	104.34	159.37	124.68	91.01	134.43	93.85	112.28	73.57	80.51	0.63	64.81	-0.643545			ArgoL1,ArgoL2,ArgoMid,ArgoN,PAZ,Piwi
TdChr001.3328	117.87	143.66	100.91	109.14	140.17	68.69	144.83	125.4	186.35	120.01	125.81	164.59	115.24	138.57	254.48	246.46	197.95	151.45	158.91	171.83	126.6	1.35	64.69	-1.62888			EF-hand_1,EF-hand_5,EF-hand_6,EF-hand_7
TdChr001.2735	386.07	203.83	181.38	140.08	191.08	112.74	155.8	197.35	70.84	222.83	34.4	83.13	77.14	121.13	97.26	49.27	76.41	68.57	69.01	165.34	60.27	5.7	64.59	-0.311168			F-actin_cap_A
TdChr004.1044	131.22	138.07	35.75	52.39	123.52	164.81	104.9	79.89	77.02	354.22	148.23	285.43	189.3	228.29	229.78	212.1	221.04	250.41	175.63	267.34	159.09	251.12	64.52	-0.871786			EnY2
TdChr002.1407	0.1	19.67	31.98	77.86	4.81	14.51	4.36	0.8	4.57	0	0	11.06	0	0.5	0.12	0.2	16.71	0.14	1.33	0.09	0.08	0	64.5	4.98827			FAD_binding_3
TdChr003.392	108.23	67.04	57.29	30.12	19.66	42.48	95.73	79.81	177.65	86.79	78.65	279.37	69.43	111.46	120.77	106.01	441.42	86.84	209.28	33.92	41.11	0.18	64.49	-0.253413			Inositol_P
TdChr001.1019	0.61	8.23	0.96	14.76	0.76	23.99	0.03	0	0.28	0	0	0	0.07	0	0.27	0	0.14	0.06	0	0	0	0	64.48	82.1911			NF
TdChr001.2845	21.6	104.89	49.32	123.3	96.71	46.03	75.17	49.31	226.48	26.22	328.5	232.38	264.92	131.28	282.11	443.91	217.24	284.75	177	16.95	159.04	0.33	64.22	-0.327276			Aldedh
TdChr006.1202	336.62	324.23	120.29	125.24	156.06	152.89	159.23	152.66	87.15	157.99	72.76	108.87	102.8	114.79	89.4	85.48	122.84	107.61	78.79	208.84	120.6	61.73	64.11	-0.845852			Ribosomal_S15
TdChr002.1173	277.16	317.29	135.29	114.75	99.73	233.31	303.73	111.6	145.11	117.78	51.67	123.95	126.44	454.66	84.74	56.64	129.4	146.17	628.68	111.7	191.42	16.78	64.02	-0.583521			3Beta_HSD,Epimerase,NAD_binding_10,NmrA
TdChr001.2822	137.92	202.69	54.47	86.77	90.9	43.34	74.22	51.29	156.04	43.75	83.05	119.95	67.04	55.25	214.04	149.7	132.35	87.39	68.47	65.79	136.08	708.81	63.84	-0.315833			Proteasome,Proteasome_A_N
TdChr002.2466	21.6	27.06	20.44	15.84	23.6	10.77	22.42	27.68	8.96	41.5	31.13	4.01	14.08	15.94	11.01	22.63	5.09	13.56	7.89	30.54	6.23	5.52	63.65	3.07164			Cu2_monoox_C,Cu2_monooxygen,NHL
TdChr002.3635	224.92	242.42	151	148.45	130.23	132.44	130.2	134.26	101.4	141.61	86.88	196.09	90.94	94.18	60.1	99.33	179	78.92	83.59	178.94	130.1	5.33	63.56	-1.09234			PMM
TdChr004.014	0	5.14	0	4.46	13.9	0	0	0	0	0	0	0	0	0	0	0	0	0	0	0	0	0	63.37	634.7			NF
TdChr003.736	215.14	136.1	116.57	117.86	74.86	39.21	68.23	94.88	38.46	93.56	28.28	43.96	32.23	45.95	28.48	30.89	33.18	27.89	28.91	90.39	21.05	2.76	63.32	0.312988			Adaptin_N,COP-gamma_platf,Coatomer_g_Cpla
TdChr002.3032	370.91	270.54	344.42	281.33	232.5	80.36	202.27	255.49	22.8	252.49	23.84	53.54	46.16	95.88	24.07	28.51	21.02	25.1	21.37	332.33	23.99	26.09	63.29	0.00043572			BH4,Bcl-2,RRM_1
TdChr005.1771	401.73	173.89	362.86	181.41	179.05	52.36	184.8	334.45	60.73	215.16	27.68	92.1	27.78	38.79	79.29	49.45	53.96	70.46	29.18	498.32	71.23	0	63.25	-0.0595616			LSM
TdChr002.185	0	2.41	8.24	81.25	35.12	4.53	32.7	25.69	126.45	3.92	150.44	97.06	136.55	74.83	118.06	88.78	73.97	127.79	124.4	5.06	93.43	0.32	63.17	-0.10593			Ets,SAM_PNT
TdChr005.1945	494.51	112.47	176.68	91.88	45.11	85.14	241.07	284.28	152.84	378.21	95.98	176.94	176.29	193.93	125.75	122.5	199.98	137	136.24	161.83	115.3	6.51	63.17	-0.906777			ADK,ADK_lid
TdChr002.2161	493.04	356.47	249.45	175.27	203.01	196.94	281.9	302.07	96.68	425.56	84.58	176.22	195.32	277.01	195.25	133.85	223.97	213.53	173.3	567.13	152.59	45.47	63.16	-1.14639			UQ_con
TdChr003.662	1.55	150.44	63.98	27.57	20.6	35.76	17.38	1.42	23.27	0.56	144.24	0.85	1.08	1.8	13.73	1.97	0.48	0.57	0.84	0	4.19	0	63.07	2.48024			Acetyltransf_1
TdChr001.612	140.21	148.15	153.06	129.9	87.55	194.49	308.56	129.68	150.25	121.78	63.08	143.1	158.41	378.76	81.47	71.63	171.79	180.64	535.4	114.47	162.72	3.07	63.06	-1.20491			Complex1_49kDa
TdChr005.1185	3	146.47	11.1	27.03	41.3	13.5	66.86	33.28	214.84	11.06	250.03	130.03	387.04	79.01	145.1	293.52	127.71	390.62	108.87	13.44	327.04	0.92	63.04	-0.0988847			ABC2_membrane,ABC2_membrane_3,ABC_tran
TdChr002.3291	216.42	234.11	164.45	110.21	108.38	301.49	314.56	142.01	192.11	154.22	149.32	363.92	320.09	537.98	197.39	192.35	423.57	372.1	757.03	167.03	370.24	16.28	62.97	-0.705703			Fer4
TdChr006.852	509.32	543.93	465.86	567.61	571.26	350.37	82.21	66	38.07	158.03	69.81	101.52	122.3	180.62	71.45	35.9	52.69	56.36	77.2	26.11	84.97	0.96	62.77	-0.0938698			Crystallin,HSP20
TdChr006.1717	2.43	4.51	27.48	4.5	86.15	40.44	28.35	25.88	143.98	4.93	9.12	74.19	17.92	22.02	52.81	7.32	31.87	13.28	26.73	4.35	7.89	1.7	62.76	1.35546			DHO_dh,Fer4_20,Fer4_21,NAD_binding_8,Pyr_redox_2
TdChr001.2393	6.37	477.02	3.07	0	0	0	0	0	0	0.04	0	0	0	0	0	0	0.05	0	0	0	0	0	62.75	523.75			NF
TdChr006.2138	68.94	222.69	145.94	147.64	93.18	340.18	662.51	281.31	582.36	296.92	210.52	858.44	935.6	1289.63	401.01	339.19	1027.39	944.22	1702.16	170.12	798.66	81.01	62.35	-0.413187			His_Phos_1
TdChr004.193	241.71	251.49	126.32	134.64	173.49	99.63	150.61	153.71	167.94	166.65	146.58	211.47	214.4	214.81	183.33	191.23	242.98	233.23	237.91	233.79	318.07	27.32	62.31	-1.42234			DUF1077
TdChr005.219	87.09	146.98	62.89	58.41	71.96	56.06	62.36	50.67	69.52	46.47	99.45	74.38	71.66	46.27	101.13	131.35	67.03	67.84	44.57	42.44	85.7	0.21	62.27	-0.174043			DUF1279
TdChr004.1292	44.15	80.28	78.11	110.12	58.61	35.31	64.35	84.18	41.75	95.37	41.05	66.27	49.96	60.33	62.98	58.46	59.5	45.98	35.91	112.55	81.14	36.04	62.23	0.0584283			DnaJ,Sec63
TdChr005.859	292.47	43.25	363.21	181.3	359.73	151.13	364.31	543.81	64.99	300.97	35.52	137.47	82.85	172.99	49.06	30.33	49.16	35.68	67.13	157.03	22.07	0.06	62.06	-0.108421			DZF,zf-met
TdChr003.584	5.38	13.1	38.56	117.89	76.41	33.76	12.41	4.96	9.67	1.8	2.98	7.84	6.11	9.01	20	32.47	3.63	7.45	8.26	2.02	9.03	2.53	61.8	2.49894			COesterase
TdChr005.100	187.43	149.75	74.28	96.6	75.74	45.72	86.91	102.79	74.61	93.75	51.2	57.46	52.14	61.54	57.45	69.69	58.12	57.39	44.89	131.63	52.05	29.18	61.74	0.00280387			SNARE,Syntaxin-5_N
TdChr001.2838	277.44	215.56	119.18	106.2	91.31	310.36	290.64	124.65	155.23	135.48	97.55	118.3	138.12	143.52	140.56	114.51	157.43	154.67	185.23	69.87	233.57	73.91	61.73	-1.24912			NDUF_B6
TdChr004.139	405.4	178.84	206.91	133.69	147.89	104.35	228.3	336.22	58.6	297.35	30.53	73.21	61.37	139.43	37.08	23	37.24	26.07	40.88	206.59	21.54	1.04	61.44	-0.0749735			eIF2A
TdChr004.852	367.82	426.95	180.58	151.43	146.37	106.07	132.71	161.53	87.53	173.66	72.33	110.72	90.4	126.62	110.93	90.43	149.18	121.66	110.56	218.81	162.18	10.52	61.06	-1.02755			Clat_adaptor_s
TdChr004.132	237.71	32.53	129.8	92.3	132.34	120.03	1070.27	614.16	1329.48	199.44	85.67	363.24	1564.83	1560.56	82.16	45.37	156.77	772.86	2731.58	74.05	327.5	0.14	60.99	-0.156931			Cation_ATPase,Cation_ATPase_C,Cation_ATPase_N,E1-E2_ATPase,Hydrolase,Hydrolase_3
TdChr004.2032	237.01	338.32	264.69	118.45	36.17	24.61	94.78	136.08	53.17	217.64	101.43	152.11	97.97	125.54	56.97	156.35	137.53	112.04	66.63	252.07	105.29	7.15	60.95	-0.563176			Thymidylate_kin
TdChr002.063	454.18	142.2	88.62	79.3	212.34	127.16	227.59	281.39	181.78	287.89	62.54	251.35	273.28	198.23	112.49	55	132.3	198.21	185.49	233.42	71.22	2.42	60.92	-0.823485			DnaJ
TdChr002.2427	87.34	148.72	242.54	211.28	260.51	180.1	154.64	140.5	136.3	167.41	77.55	119.08	125.29	122.67	150.44	113.28	183.59	159.04	126.41	150.35	206.85	7.95	60.87	-1.65629			G-gamma
TdChr002.2987	605.69	651.88	217.76	253.08	172.05	251.99	334.74	234.47	450.36	195.01	263.57	467.69	406.88	337.75	300.13	369.14	538.29	448.44	469.88	174.9	410.15	149.02	60.84	-1.22569			vATP-synt_E
TdChr001.1184	113.4	24.49	1.79	0.15	0.28	1.66	1.72	1.15	0.29	2.3	0	1.09	0.4	1.31	0	0	0.25	0.07	0.22	1.78	0.46	0	60.75	36.2703			Trypsin
TdChr004.184	25.18	30.87	12.98	11.38	9.97	7.37	42.73	74.57	13.84	91.85	1.66	19.31	11.77	36.08	14.81	1.6	29.22	2.97	13.11	109.66	6.93	0	60.65	1.88356			Mur_ligase_M
TdChr003.414	87.25	117.99	88.39	122.36	240.14	121.17	124.51	119.85	203.29	119.29	151.35	325.57	171.95	152.13	155.44	195.78	276.28	185.78	201.93	63.33	148.33	22.88	60.61	-1.2129			DUF2370
TdChr003.198	151.6	99.98	52.13	70.28	20.97	39.71	118.38	173.5	122.25	193.9	30.52	59.47	69.96	107.22	51.3	15.28	28.55	36.6	44.15	174.52	10.3	0.47	60.6	0.0155029			Aa_trans
TdChr006.351	11.56	112.48	7.96	71.12	69.06	44.62	80.23	53.78	106.46	37.6	10.93	19.95	106.35	133.48	123.42	6.59	9.72	47.65	164.85	34.23	15.12	0.38	60.59	0.162898			MFS_1,Sugar_tr
TdChr005.586	409.68	434.69	269.16	185.01	198.19	115.67	180.13	189.98	111.12	244.01	105.5	175.11	135.59	155.24	201.12	157.57	204.08	129.96	95.85	236.84	132.14	23.16	60.4	-1.43469			AAA
TdChr006.927	337.96	201.85	313.52	206.35	166.55	161.37	335.42	498.76	76.4	405.28	42.35	93.38	80.24	169.7	48.48	52	79.22	37.34	36.39	345.63	33.56	0.23	60.28	-0.157296			HSP70,MreB_Mbl
TdChr005.422	472.58	419.28	214.37	137.14	116.33	73.95	113.44	142.91	57.98	185.89	52.81	76.8	60.13	96.7	119.63	93.41	95.38	66.06	49.37	130.3	85.49	5.12	60.2	-0.496251			JAB,MitMem_reg
TdChr001.3525	428.36	76.16	147.57	100.95	155.83	93.41	186.02	249.45	152.31	224.89	71.88	119.45	73.34	111.61	100.72	54.54	43.53	34.11	56.96	88.17	17.99	0.83	60.15	-0.362464			UBA,ubiquitin
TdChr006.2031	1334.31	276.14	321.1	156.9	94.71	89.05	325.2	517.78	22.2	513.85	31.98	42.3	77.97	221.52	35.78	26.01	32.26	31.95	35.42	269.3	12.27	0.34	60.02	-0.0741587			RRM_1
TdChr005.768	143.58	383.96	151.26	125.13	84.84	216	219.86	67.21	108.42	56.16	58.11	109.73	124.33	95.84	111.05	78.97	154.43	112.61	122.47	86.76	156.36	80.84	59.84	-0.790198			ETC_C1_NDUFA5
TdChr001.464	0	0	2.63	0	1.17	0	0	0	0.4	0.8	83.85	5.75	0	3.37	0	0	0.83	2.91	0	0	0.83	0	59.82	29.96			NF
TdChr004.773	201.69	169.56	77.37	45.27	139.75	107.56	319.26	479.74	425.92	330.12	108.78	176.11	177.63	242.24	315.1	101.23	94.57	118.05	198.69	175.95	54.26	0.11	59.76	-0.883502			Spot_14
TdChr003.579	14.43	40.58	10.45	16.66	14.81	35.28	16.26	14.02	20.13	17.1	61.71	32.43	48.64	21.31	20.04	115.95	25.29	40.09	20.94	5.67	17.01	0.23	59.74	1.78472			Sugar_tr
TdChr004.069	61.36	51.87	175.61	137.24	105.6	119.29	143.43	167.59	68.79	230.12	89.37	148.71	141.93	147.18	133.22	113.41	168.48	107.47	101.72	430.95	261.14	27.53	59.74	-1.17024			DUF2462
TdChr002.2391	342.4	230.66	210.55	259.63	335.78	223.8	189.26	176.21	182.56	276.52	140.85	495.63	189.27	202.72	194.35	278.88	844.19	218.02	192.63	300.37	162.54	3.98	59.63	-1.64131			PX
TdChr003.1436	186.99	113.77	115.32	116.09	78.81	57.26	123.9	88.79	100.4	61.13	52.14	99.03	45.21	59.41	31.94	55.43	55.04	32.34	49.56	84.17	13.2	20.88	59.62	0.00204228			IP_trans
TdChr006.1675	191.95	351.32	270.38	172.18	80.56	123.07	162.13	128.97	96.91	159.74	49.69	114.06	65.3	52.39	98.39	64.69	77.21	64.47	95.81	92.13	123.56	69.79	59.54	-0.484592			Ribosomal_S21
TdChr002.1486	273.07	237.97	82.68	99.02	131.5	147.61	122.75	112.14	152.32	95.52	105.49	302.09	146.91	127.9	185.61	135.07	302.19	189.28	143.47	189.9	271.14	7.54	59.43	-1.0379			NKAP,SynMuv_product
TdChr004.1686	149.26	91.74	63.22	70.33	20.15	21.27	61.68	85.01	28.14	118.7	28.68	39	41.22	51.5	38.12	37.15	38.43	25.4	22.32	104.16	38.14	0.06	59.41	0.533212			TMPIT
TdChr004.751	6.75	121.41	59.22	60.95	15.53	5.2	10.29	9.49	9.18	8.99	6.98	7.62	5.3	6.13	8.74	9.42	6.03	4.93	4.86	10.62	2.67	0.17	59.22	10.3436			Carboxyl_trans
TdChr002.706	243.86	148.78	261.72	92.71	55.39	71.83	206.62	285.28	6.18	375.64	9.99	9.27	34.22	131.94	17.3	12.77	11.48	14.18	8	207.58	34.86	0.26	59.22	0.0237211			Gar1
TdChr006.1655	34.51	42.62	14.87	23.65	20	22.54	24.09	24.5	21.94	27.88	70.73	37.66	85.81	41.15	42.24	47.89	38.11	67.92	32.03	38.41	180.01	8.62	59.03	0.999302			Glyco_hydro_18
TdChr003.508	195.77	68.24	182.77	127.61	89.74	84.75	232.56	358.89	18	486.93	14.89	30.61	60.1	158.64	20.54	38.2	31.73	31.19	21.93	452.64	30.13	0	58.93	-0.00761918			Dpy-30
TdChr003.1902	368.56	296.62	133.67	88.47	66.56	223.26	276.43	111.1	157.73	139.42	121.62	442.74	621.03	1152.5	172.74	179.38	455.09	874.14	2280.69	107.4	591.77	12.56	58.77	-0.362267			Oxidored_q6
TdChr006.2222	46.43	111.63	78.94	199.44	111.09	77.14	134.86	97.84	236.4	80.82	122.78	151.35	113.31	102.64	366.03	155.05	137.59	103.19	120.6	65.84	126.6	0.71	58.77	-0.934715			MaoC_dehydrat_N,MaoC_dehydratas,SCP2,adh_short
TdChr006.1466	67.42	87.02	114.47	96.24	169.88	170.95	113.4	95.95	99.57	126.46	50.48	163	386.86	171.85	77.21	65.83	120.68	251.08	166.58	70.31	100.54	0.55	58.63	-0.458795			CAP_C,CAP_N
TdChr003.507	11.66	115.46	39.18	25.14	14.15	10.21	14.4	12.37	8.74	14.68	4.12	7.53	4.01	6.75	22.18	3.94	9.18	5.32	4.2	14.13	3.48	10.62	58.52	5.57815			PfkB
TdChr004.834	344.87	261.52	151.7	216.26	132.2	57.88	130.19	196.53	12.89	246.8	11	17.23	27.39	100.46	25.22	12.48	21.41	15.05	11.74	221.59	15.02	3.45	58.52	0.00464883			tRNA-synt_2,tRNA_anti-codon
TdChr004.2025	22.75	10.09	15.98	11.81	28.53	18.86	47.03	66.39	38.77	29.84	14.23	60.3	7.71	20.87	9.37	1.31	4.68	2.12	9.03	35.62	0.68	0	58.46	1.7408			Glyco_transf_7C,Glyco_transf_7N
TdChr004.365	105.05	160.85	153.48	96.76	85.09	59.36	139.6	198.1	49.26	268.34	42.4	52.04	55.61	108.67	83.34	76.82	73.36	48.88	36.4	261.72	50.47	1.06	58.22	-0.253494			SEP,UBA_4,UBX
TdChr002.3324	52.19	24.01	28.08	24.79	37.48	11.67	2.83	0.47	8.16	0.41	3.15	5.91	7.29	3.55	6.04	1.42	4.42	4.86	4.99	0.17	7.9	8.41	58.04	3.57094			DnaJ,TM2
TdCtg271.001	125.25	73.66	143.1	117.2	137.05	109.39	98.71	90.05	94.85	81.46	54.36	175.35	136.78	136.61	83.35	61.1	128	111.78	149.67	83.42	126.18	2.23	57.76	-1.0306			Collagen,WD40
TdChr006.656	53.27	55.69	63.44	87.07	98.46	67.86	127.25	126.56	96.67	110.89	35.02	98.39	123.91	212.68	66.57	36.32	98.37	112.73	144.16	188.2	225.76	1.86	57.75	-0.625888			Thioredoxin
TdChr005.632	64.28	93.97	98.94	61.61	64.13	53.8	64.42	93.87	19.12	93.55	17.83	22.21	22.59	43.18	30.86	21.78	21.36	16.58	14.73	94.17	25.61	0.34	57.74	0.341884			DHHA1,tRNA-synt_2c,tRNA_SAD
TdChr002.2090	647.98	169.61	231.34	168.14	424.99	148.75	296.48	462.1	66.43	403.3	24.2	46.81	55.67	186.52	45.03	13.73	27.95	20.44	37.59	380.89	22.45	0.46	57.68	-0.037407			-
TdChr002.704	272.88	199.46	197.43	151.26	154.73	76.23	143.5	175.48	93.63	202.7	52.82	104.73	74.74	105.2	124.82	82.05	115.58	81.04	78.94	187.24	103.34	13.01	57.62	-0.557179			AAA
TdChr002.3320	832.64	973.39	252.74	308.6	667.81	404.55	308.7	172.94	158.77	156.8	104.64	133.57	135.01	103.19	180.6	174.02	163.22	159.62	119.75	208.7	262.95	127.83	57.52	-0.760761			EF-hand_1,EF-hand_6,EF-hand_7,EF-hand_8
TdChr002.2443	14.16	228.63	121.46	113.4	76.43	38.88	25.75	18.35	50.5	16.09	22.45	42.02	34.02	26.97	37.96	28.24	41.99	30.55	28.87	18.94	51.58	0.26	57.46	0.870562			ECH_2
TdChr003.1360	407.49	356.54	200.1	161.01	193.18	132.5	248.31	261.94	120.06	236.25	77.09	150.94	194.31	188.34	122.08	151.29	184.05	226.46	173.56	281.87	243.04	33.83	57.29	-1.33588			Nsp1_C
TdChr005.484	78.96	134.61	82.45	106.98	49.79	31.08	101.23	107.4	95.04	107.72	30.19	88.19	307.32	243.64	65.57	47.29	119.67	397.32	347.14	142.72	97	5.75	57.28	-0.60199			Mito_carr
TdChr003.1566	11.83	127.02	63.9	97.86	77.36	29.38	37.41	21.29	156.64	10.05	80.22	69.45	97.59	80.47	434.76	153.3	76.8	129.08	110.59	4.62	253.35	704.34	57.26	-0.282868			Tetraspannin
TdChr005.2203	44.25	7.19	15.07	56.03	101.31	31.37	416.25	999.03	143.97	944.24	35.09	71.45	131.98	372.13	49.56	43.25	45.59	54.17	53.24	504.97	61.4	0	57.17	0.013146			ABC_membrane_2,ABC_tran
TdChr002.1212	1.17	21.26	2.34	0.96	0.33	0.57	0.08	0	0	0	0.1	0.42	0.61	0	0.61	0.1	0.16	1.57	0.28	0	0.17	0	57.06	67.3136			Trypsin
TdChr006.773	294.88	226.5	122.32	135.68	137.53	59.83	94.15	99.49	101.82	128.93	87.66	84.36	64.53	76.08	137.06	110.62	105.22	70.06	68.89	150.54	96.94	37.74	57.04	-0.713744			Rab5ip
TdChr001.3252	119.07	124.14	74.97	83.76	136.22	113.54	217.86	265.95	352.28	280.47	169.31	201.95	332.18	268.21	381.83	198.19	161.94	321.95	290.52	235.37	335.03	7.44	57.04	-0.883042			GBP,GBP_C
TdChr004.2076	4.44	16.52	6.33	13.43	14.02	1.13	1.31	1.55	2.95	0.94	1.43	0.9	0.36	0.3	7	2.12	0.94	0.71	0.36	1.38	10.71	2.18	56.93	9.52446			NF
TdChr003.1465	516.5	409.98	301.14	157.97	126.8	110.01	174.14	187.32	17.67	225.19	33.67	32.85	41.77	106.17	34.12	30.6	40.07	39.88	21.84	340.49	78.8	0	56.83	-0.148841			LSM
TdChr003.530	1658.34	869.87	301.83	151.14	170.12	134.7	189.74	258.08	21.39	420.07	45.38	33.14	49.04	112.26	64.14	31.84	76.25	78.94	48.84	406.97	83.55	42	56.81	-0.152168			Rad60-SLD
TdChr006.712	0.16	3.27	0.65	1.43	0.09	0	0	0	0	0	0	0	0	0	0	0	0	0	0	0	0	0	56.8	392.414			NF
TdChr003.1524	215.49	151	67.63	70.32	57.33	51.67	64.19	74.09	53.8	107.02	73.35	111.66	63.04	77.04	84.86	97.09	112.82	76.21	58.24	108.22	58.37	7.2	56.58	-0.38016			Yip1
TdChr002.2672	0	0	18.46	1.74	38.67	0.98	0	0	0.36	0	0	1.03	0	0	7.73	0	0	0	0	0	0.75	0	56.57	51.2851			NF
TdChr004.652	237.89	112.38	66.94	88.01	59.5	39.6	84.73	124.33	46.52	159.43	56.54	68.52	83	93.07	71.81	62.56	68.5	71.25	82.93	95.71	42.43	3.3	56.48	-0.449724			GRASP55_65
TdChr001.678	3.06	37.41	28.41	49.42	22.49	5.17	24.85	15.92	72.69	1.45	22.71	17.71	24.43	15.36	16.51	5.64	3.32	4.27	17.71	5.21	2.57	0.37	56.45	2			p450
TdChr003.1736	0	0	2.47	0	0.24	0.69	1.26	1.09	0.06	1.52	0	0.31	0	1.41	0	0.08	1.35	0	0.51	0.84	0	0.2	56.42	44.1412			NF
TdChr005.2139	107.27	68.07	81.89	59.26	33.83	33.18	62.08	105.96	9.81	102.02	13.05	13.86	17.13	41.01	14.32	12.23	10.39	10.75	7.74	87.85	9.7	0.15	56.42	0.434758			Anticodon_1,GST_C,Val_tRNA-synt_C,tRNA-synt_1
TdChr004.070	52.47	124.94	42.25	49.21	85.79	10.25	25.8	14.4	47.92	6.06	6.69	12.25	11.55	10.98	28.23	9.36	4.96	8.41	10.35	8.74	4.88	0.39	56.32	1.22562			IQ,Myosin_TH1,Myosin_head
TdChr006.1912	20.45	2.81	44.36	54.61	156.84	68.18	111.17	90.57	156.84	44.37	21.26	57.27	72.72	62.65	32.76	5.33	6.96	5.52	47.45	56.55	2.25	0	56.31	0.17294			Jun,bZIP_1
TdChr001.713	14.4	152.56	59.47	52.15	49.99	27.16	9.47	4.13	16.25	1.14	11.2	9.78	25.52	11.83	31.76	18.65	14.91	21.89	16.26	2.53	9.85	0.9	56.29	2.03292			HMGL-like
TdChr005.061	199.48	198.36	80.71	47.54	49.12	37.07	39.66	47.6	32.72	62.25	11.41	26.14	29.71	39.29	52.84	18.88	23.46	43.65	52.26	89.8	47.92	5.59	56.19	0.373932			RNA_pol_A_bac,RNA_pol_L
TdChr005.1180	108.75	55.36	81.57	86.31	62.7	35.94	206.69	208.66	719.84	100.84	42.75	184.26	55.03	114.66	200.34	26.82	71.25	24.83	154.16	118.81	14.37	0.35	56.1	-0.289298			Hexokinase_1,Hexokinase_2
TdChr006.1997	0.57	15.85	16.61	341.22	9.67	9.82	0.54	0.23	0.14	0.49	0	0	0	0.11	1.66	0	0	0.15	0.05	0.34	0.13	0	56.06	9.7439			AMP-binding,AMP-binding_C
TdChr004.010	283.63	261.08	101.68	112.5	131.31	164.28	113.62	72.63	149.24	57.49	86.96	169.31	160.65	124.92	138.1	130.96	196.54	202.09	155.22	59.38	190.71	106.48	55.99	-1.19748			DUF1241
TdChr005.1078	222.73	177.38	392.04	184.61	208.37	60.73	206.3	296.24	13.5	180.44	9.27	29.56	33	72.79	19.42	12.68	14.41	9.7	15.39	328.12	39.24	0	55.89	0.000553541			LSM
TdChr002.739	24.35	14.12	10.54	8.06	65.4	10.61	10.97	4.68	38.81	0.09	3.63	11.34	6.34	3.8	1	0.54	0.79	0.7	3.55	0.67	0.06	0	55.8	4.87345			MFS_1
TdChr003.932	275.56	266.5	47.35	48.78	28.96	27.15	21.18	23.5	32.33	27.82	17.01	31.69	27.63	21.05	51.91	25.48	33.25	22.71	20.41	33.75	41.7	18.98	55.73	1.24861			DUF788
TdChr002.3456	249.38	305.08	321.67	251.12	256.95	111.28	204.72	258.6	79.91	251.27	37.3	57.88	88.76	106.27	62.1	55.76	63.93	82.21	77.25	373.73	93.8	0.98	55.7	-0.201827			Prefoldin
TdChr002.3624	211.48	251.48	171.66	146.49	130.84	79.56	114.27	130.69	85.4	125.42	51.68	118.45	75.76	95.94	118.55	82.36	133.8	82.12	74.04	141.57	98.14	10.64	55.7	-1.13358			PCI
TdChr004.367	167.66	91.98	110.39	119.57	201.9	141.15	218.46	234.49	180	216.88	77.65	174.18	258.25	252.48	133.98	94.09	142.21	213.16	290.46	174.07	216.64	4.64	55.66	-1.16127			zf-C3HC4,zf-C3HC4_3,zf-RING_2
TdChr002.888	499.3	273.52	534.82	276.29	409.58	165.84	218.63	219.59	29.5	205.66	34.8	109.51	52.56	90.19	41.02	24.97	41.2	16.89	29.12	139.7	14.47	0.45	55.62	-0.184272			HnRNP_M,RRM_1
TdChr004.959	122.79	122.27	103.82	97.05	128.33	82.48	109.54	106.28	107.75	132.67	91.42	154.37	181.58	139.61	84.68	100.36	144.47	101.02	135.27	82.2	255.02	0	55.57	-1.30739			DLIC
TdChr005.799	306.5	399.89	143.83	114.79	98.48	195.2	279.46	106.88	168.18	118.49	63.4	163.39	140.15	176.26	106.49	96.64	194.73	166.68	242.85	132.57	230.06	6.32	55.43	-0.999095			Complex1_30kDa
TdChr003.133	175.59	76.4	57.03	55.84	24.08	25.85	30.82	35.85	17.36	59.63	21.85	14.13	17.51	30.74	22.54	18.14	18.3	12.13	13.36	74.29	12.34	31.62	55.4	0.782425			Got1
TdChr003.1959	722	924.39	268.97	806.68	187.04	403.62	138.43	43.75	210.45	41.34	16.33	52.85	479.03	316.9	146.33	32.98	71.25	347.19	384.08	28.45	102.02	8.8	55.4	-0.286137			Crystallin,HSP20
TdChr005.065	114.61	200.5	164.4	136.46	117.95	261.25	299.89	150.23	133.78	188.24	53.12	119	91.33	125.01	99.91	86.28	135.27	84.37	124.67	205.01	138.48	2.46	55.19	-1.12825			NDUF_C2
TdChr002.1283	151.27	269.79	360.19	294.07	277.94	216.09	226.36	262.22	74.03	248.15	39.24	52.29	71.02	106.74	62.61	50.89	49.35	80.78	44.04	357.96	131.37	2.59	55.15	-0.255451			Prefoldin_2
TdChr003.1682	8.71	20.98	10.71	39.26	44.31	30.64	34.86	27.26	93.61	15.57	12.41	177.66	40.1	38.69	53.88	7.46	45.04	13.59	32.4	13.5	7.9	0.06	55.03	0.834412			MOSC,MOSC_N
TdChr003.856	330.21	163.51	159.55	103.5	67.47	103.54	116.34	118.01	34.25	116.68	30.18	91.15	68.86	95.1	43.87	37.19	52.78	44.32	57.68	127.55	51	0.18	54.82	-0.202175			AAA,FtsH_ext,Peptidase_M41
TdChr002.2747	132.09	169.88	272.16	287.38	474.3	327.19	414.65	307.3	481.5	268.17	165.11	521.8	213.49	230.65	215.83	307.4	489.96	286.22	259.33	485.15	310.43	0	54.69	-1.48011			ATP_synt_H
TdChr001.114	164.15	235.41	120.02	163.79	95.12	157.75	286.04	157.87	284.41	134.96	95.94	367.68	241.28	401.68	178.15	139.77	400.25	255.37	532.15	104.02	243.91	14.29	54.67	-0.767579			PGK
TdChr003.1481	182.42	75.04	94.02	98.59	75.59	37.69	63.07	92.97	33.41	95.49	29.52	46.28	33.65	50.1	29.56	30.05	32.63	23.65	23.6	72.57	16.67	0.53	54.48	0.181978			COPI_C,Coatomer_WDAD,WD40
TdChr004.1596	54.71	39.9	38.57	55.28	62.53	44.39	50.95	49.05	61.25	82.26	46.69	74.51	59.56	71.21	107.65	68.8	87.45	57.27	47.52	48.34	42.2	0.62	54.34	-0.0144695			adh_short_C2
TdChr005.2094	688.55	226.78	285.81	218.03	448.03	216.53	321.06	383.18	166.65	329.36	35.43	118.14	59.9	149.41	36.02	17.93	35.08	17.69	41.23	225.32	31.44	0.49	54.34	-0.430371			Pkinase
TdChr001.3355	66.94	98.34	169.93	106.83	82.91	91.45	125.86	129.75	42.45	182.62	30.62	71.92	61.93	89.3	66.38	47.25	81.44	57.98	56.29	341.12	90.85	4.95	54.33	-0.592975			Ribosomal_L37
TdChr003.563	419.96	106.87	354.76	217.72	374.47	231.89	367.89	484.49	143.55	426.68	125.37	493.63	228.05	321.35	180.22	147.64	347.48	158.68	222.05	247.22	120.77	1.22	54.31	-0.804522			zf-C2H2_jaz,zf-met
TdChr003.2163	207.93	66.11	70.45	95.66	150.29	75.65	153.28	181.95	30.78	191.23	13.55	50.17	28.17	66.13	15.28	9.51	25.23	8.14	17.52	211.93	6.71	0.83	54.3	0.000937427			ECH_1
TdChr004.2092	13.58	3.1	91.82	136.14	148.21	94.42	108.69	94.9	153.9	92.54	105.75	297.22	124.87	137.18	89.07	90.06	160.22	80.53	168.18	72.07	30.74	0.26	54.3	-0.661925			Ras
TdChr001.227	311.69	320.71	339.89	211.29	186.83	268.05	237.56	258.11	186.44	192.5	113.88	175.42	174.22	168.58	229.35	175.23	298.58	176.79	139.44	314.12	280.52	2.83	54.28	-1.38591			zf-Tim10_DDP
TdChr001.1010	255.36	208.44	158.67	108.25	61.15	138.57	374.29	188.35	250.23	139.87	51.19	121.01	377.19	2028.54	42.46	44.45	108.51	342.41	2972.49	143.82	539.44	0	54.17	-0.417901			Iso_dh
TdChr002.575	11.6	42.62	12.53	16.68	16.83	17.6	15.61	13.13	20.89	17.8	8.56	53.39	22.36	25.9	20.49	11.84	50.28	18.2	23	15.15	23.71	2.28	54.09	3.9066			DUF1115,RWD
TdChr001.2461	104.74	218.96	115.73	83.53	18.55	19.64	68.78	84.08	22.11	94.88	20.8	26.58	29.91	62.51	42.35	22.23	35.68	21.45	62.69	117.21	36.85	2.84	54.07	0.191464			Abhydrolase_2
TdChr006.1524	0	14.28	2.3	25.94	0	0	0.1	0	0	0	0	0	0.21	0	0	0	0	0.19	0	0	0	0	54.02	220.898			NF
TdChr002.2113	625.16	378.91	249.68	169.12	108.69	75.55	218.14	319.42	77.46	338.23	50.32	108.04	90.21	173.76	79.95	65.68	91.23	74.29	76.44	511.44	111.79	34.44	53.87	-0.342183			SGTA_dimer,TPR_1,TPR_11,TPR_2,TPR_8
TdChr003.1479	310.2	80.96	265.87	180.77	234.31	162.66	247.76	316.64	90.36	413.77	67.23	176.51	108.81	205.81	74.77	65.85	97.64	69	94.67	346.98	33.18	1.15	53.77	-0.324609			Metallophos,STPPase_N
TdChr001.3317	0.77	4.9	48.28	43.78	15.46	14.19	8.45	10.98	7.08	0.81	0.32	3.6	0.54	1.22	1.41	0.09	0.24	0.17	1.24	29.14	0	0	53.71	4.27581			MFS_1
TdChr002.1509	566.5	329.24	196.32	120.97	123.35	91.59	158.62	226.12	39.84	305.25	55.33	96.78	73.85	151.48	60.63	55.46	79.55	48.07	48.96	317.47	69.83	9.28	53.63	-0.309883			Pkinase
TdChr001.758	67.79	55.39	38.99	38.94	53.2	50.94	97.74	138.51	113.22	165.27	43.96	121.82	120.25	145	95.11	62.35	95.81	82.54	132.15	114.75	47.09	0.69	53.36	-0.443766			PP1c_bdg
TdChr002.3690	61.44	29.63	10.17	18.38	25.87	0.73	1.14	0.82	0.88	0.97	0.22	1.08	0.35	1.84	1.24	0	0.3	0	8.8	0.72	0	0	53.26	5.65767			SNF
TdChr005.493	382.25	93.25	116.99	75.49	110.26	60.41	225.31	291.88	120.27	288.63	37.1	217.48	126.42	176.1	87.73	35.72	139.31	89.77	177.43	248.96	95.86	1.94	53.25	-0.548881			Ank,Ank_2,Ank_4
TdChr005.109	82.55	64.72	83.43	135.25	155.03	112.68	161.18	108.86	572.05	41.54	135.35	155.48	221.55	104.08	944.48	215.67	217.4	302.76	153.08	23.9	260.66	2.65	53.24	-0.613641			adh_short
TdChr002.1265	194.74	93.72	71.79	77.77	61.02	30.95	55.13	80.55	30.1	83.97	20.63	43.18	22.63	43.61	27.2	18.7	24.06	13.74	19.9	81.69	14.4	0	53.15	0.189108			EMP70
TdChr003.176	147.31	93.51	98.95	85.62	73.98	58.2	99.42	131.02	40.91	129.83	28.34	50.41	45.64	68.8	32.03	37.52	46.36	39.04	35.87	161.64	24.13	4.49	53.1	0.00172265			ArfGap
TdChr001.2124	282.08	441.76	66.36	51.43	77.2	73.3	43.81	40.18	22.86	66.5	19.27	30.08	27.46	29.28	21.32	23.31	37.4	54.52	17.95	53.65	42.31	111.1	53.09	0.245807			ubiquitin
TdChr001.3227	378.85	172.74	292.48	187.24	178.07	91.24	157.04	206.48	34.6	205.81	38.15	123.67	65.92	99.64	52.28	45.72	128.78	70.58	49.85	243.62	86.92	0.43	52.98	-0.35781			DEAD,Helicase_C
TdChr004.1642	368.51	231.28	81.39	74.52	50.61	58.92	91.74	100.54	47.49	164.1	47.43	77.92	80.86	90.43	81.14	75.03	97.14	68.02	42.74	164.52	55.97	33.89	52.94	-0.620681			DUF106
TdChr001.2852	218.29	299.94	121.84	111.4	96.34	208.82	287.94	117.24	189.34	92.01	71.62	153.31	192.15	694.73	104.93	88.61	192.26	212.42	1021.23	151.39	425.25	172.39	52.91	-1.11269			ETC_C1_NDUFA4
TdChr003.731	215.84	165.98	145.76	119.85	74.53	153.15	277.15	134.94	115.26	143.32	36.39	101.06	138.51	433.55	47.53	33.81	88.59	139.42	496.19	98.64	98.68	0.95	52.9	-0.983161			Pyr_redox_2,Pyr_redox_dim
TdChr003.373	11.12	26.65	23.13	41.65	23.54	14.87	23.98	25.57	43.85	23.12	23.62	31.36	29.5	23.86	56.45	20.05	27.47	34.39	28.96	26.79	29.01	2.28	52.89	3.66088			Ank,Ank_2,Ank_3,Ank_4,Death,RHD_DNA_bind,RHD_dimer
TdChr006.1477	10.64	853.58	722.77	3139.13	1979.46	17.58	327.77	518.37	875.78	95.11	15597.2	110.41	1066.35	171.92	679.8	5221.98	77.57	1082.43	121.01	18.64	5477.63	0	52.83	-0.471022			OS-D
TdChr005.1535	71.91	79.73	39.76	45.16	33.67	89.61	376.22	234.67	399.75	216.42	167.09	365.32	1599.82	6344.51	141.41	228.88	351.67	1424.54	7006.78	217.51	899.54	10.65	52.83	-0.527052			PRELI
TdChr002.321	8.01	13.32	207.24	129.18	146.54	106.66	115.09	84.48	45.55	57.38	43.77	89.1	64.54	77.03	101.74	54.99	96.14	66.11	60.68	135.68	186.64	9.63	52.81	-0.422602			Ribosomal_L1
TdChr004.498	181.92	208.72	191.9	90.48	48.58	55.19	138.44	184.73	14.05	217.56	17.65	36.21	34.18	97.58	25.74	19.8	34.5	26.61	16.65	205.67	25.13	0.7	52.79	0.0319626			MMR_HSR1,MMR_HSR1_Xtn,TGS
TdChr006.067	9.25	135.06	80.78	62.61	34.91	43.2	74.28	45.63	13.85	20.72	14.79	18	24.23	19.05	23.42	19.85	21.48	21.15	15.58	41.68	23.76	2.74	52.71	1.13082			B3_4,B5
TdChr003.570	370.91	140.7	131.31	100.17	114.07	61.55	152.37	218.81	63.32	231.85	27.63	49.56	49.74	138.69	57.1	32.57	55.92	45.04	138.26	155.52	41.44	4.22	52.71	-0.11659			UBA,UQ_con
TdChr005.712	73.77	132.75	54.39	53.49	68.54	24.07	42.43	62.85	27.41	70.58	21.61	55.74	25.83	46.07	35.2	31.01	53.18	22.2	41.2	110.71	37.91	2536.55	52.7	0.00305904			Cornichon
TdChr002.3223	55.54	73.35	115.78	103.4	116.04	157.46	94.63	89.54	68.4	124.91	62.94	306.88	82.38	102.95	111.82	113.68	455.97	71.75	124.67	109.66	69.24	37.52	52.59	-1.10425			CutA1
TdChr003.1537	76.14	153.43	237.89	166.65	151.71	122.41	136.17	129.96	65.03	179.54	49.32	107.69	132.88	124.96	78.43	75.07	129.3	112.17	94.34	202.52	150.11	0.66	52.56	-0.980671			Prefoldin
TdChr003.372	121.6	54.38	62.43	70.25	62.39	39.11	86.03	141.42	49.01	120.45	21.37	72.07	50.13	79.82	25.42	16.23	48.2	26.25	51.83	142.6	8.76	0.95	52.54	0.00230601			TraB
TdChr001.737	119.35	230.26	69.51	56.94	44.08	51.11	107.79	86.98	66.2	111.86	27.76	67.57	107.76	334.82	51.04	35.92	84.8	118.85	1063.4	150.16	86.9	30.81	52.44	-0.506595			MMADHC
TdChr004.610	554.54	237.14	302.9	126.9	143.69	60.43	140.55	190.96	16.74	198.64	14.8	33.8	41.45	75.33	39.36	27.92	36.18	28.93	18.77	105.33	38.91	0.26	52.39	0.000902079			LSM
TdChr002.3406	170.86	21.29	456.95	154.11	256.83	341.06	621.13	949.58	186.11	994.95	182.79	348.57	218.28	448.62	92.11	125.18	141.66	111.3	211.48	440.31	100.08	0.37	52.35	-0.48375			DEAD,Helicase_C,P68HR
TdChr001.3613	359.61	350.29	181.5	125.12	72.5	49.48	114.97	112.19	208.92	191.54	208.1	635.1	389.45	261.84	228.18	331.59	622.97	465.04	304.25	112.15	310.01	0	52.35	-0.687901			RNA_pol_Rpb8
TdChr003.661	0.12	13.4	19.29	32.69	0.33	2.42	0.55	0	0.24	0	0.49	0.39	0	0.18	0.22	0	0	0	0.09	0	0.11	0.11	52.34	84.2903			Sulfotransfer_1
TdChr003.1735	0.14	0.18	2.01	0	0	0.56	0.28	0.35	0.06	0.92	0.15	0.16	0	0.55	0.18	0.15	0.3	0.21	0	0.49	0	0	52.29	106.551			NF
TdChr005.411	39.87	69.33	0.35	0.62	0.23	0	0.48	0.58	0.08	1.62	0	0	0	0.47	0.13	0	1.01	0.15	0	2.28	0.37	0	52.26	56.8415			NF
TdChr005.1849	343.43	249.67	174.35	123.97	131.92	127.09	112.12	139.09	58.61	127.15	29.33	87.76	40.39	87.52	56.46	38.74	111.83	54.03	67.9	217.17	75.45	5.76	52.25	-0.476005			MRP-S32
TdChr002.3069	38.82	110.73	68.52	97.2	83.77	49.41	46.63	24.14	102.45	20.89	57.14	58.16	68.27	46.31	132.41	84.8	84.98	78.95	53.55	21.07	72.84	0.84	52.24	-0.153501			ECH_1
TdChr006.2166	294.44	360.56	205.8	180.9	122.79	545.78	476.88	171.76	294.44	72.68	99.09	222.29	410.29	674.32	188.03	167.87	413.85	220.55	727.95	93.39	384.14	0	52.2	-0.667698			MWFE
TdChr002.2911	290.77	409.34	143.15	93.84	76.46	98.91	98.32	98.37	32.94	102.59	29.41	44.36	44.04	61.71	49.37	38.47	47.73	38.68	38.5	141.58	92.23	94.2	52.13	-0.444261			Ribosomal_S7
TdChr003.947	21.52	89.89	265.16	255.9	247.81	85.45	143.22	163.32	62.56	154.34	49.76	117.18	64.42	115.83	88.77	65.45	112.66	57.01	79.61	105.02	57.68	0.5	51.98	-0.522799			TPR_1,TPR_16,TPR_2,TPR_8
TdChr005.1762	57.19	39.7	28.69	20.29	78	54.09	23.13	9.14	40.88	2.37	20.79	33.12	21.85	15.58	20.42	10.37	10.17	7.61	16.84	3.69	1.87	0	51.95	1.17781			PB1,PDZ
TdChr005.104	422.55	322.72	146.04	95.87	81.32	56.29	115.27	172.45	21.03	232.4	31.73	49.79	52.81	110.86	41.18	44.57	56.57	40.76	25.84	240.52	56.16	0.65	51.95	-0.0482476			CS,NuDC,Nudc_N
TdChr004.455	0.26	13.28	7.35	15.04	44.94	94.82	40.29	4.6	19.67	0.18	7.45	9.39	5.94	5.97	1.24	1.1	1.5	3.48	8.15	0.54	3.53	0	51.93	3.57331			Pyridoxal_deC
TdChr002.3414	6.57	619.84	463.14	718.52	270.69	107.8	70.62	42.13	308.62	23.4	69.83	0.08	1.09	17.52	612.01	3.29	0.1	0.83	2.57	6.2	1.93	0	51.93	0.153024			ERAP1_C,Peptidase_M1
TdChr004.1138	168.93	247.78	267.12	239.78	259.01	115.6	219.76	181.29	162.49	141.53	67.54	90.42	47.64	104.7	95.23	81.19	110.5	114.93	54.71	194.67	136.21	112.06	51.93	-0.667367			Ribosomal_S14
TdChr003.416	26.15	8.39	48.77	67.18	120.47	53.44	77.79	79.72	50.2	42.41	10.93	30.06	17.76	27.74	16.99	7.39	13.87	8.74	14.44	20.45	3.99	0.02	51.71	0.663821			I-set,Ig_3,LRR_8
TdChr001.3194	215.72	121.85	219.98	111.86	65.48	97.31	207.62	288.14	71.76	370.5	41.72	58.58	55.82	146.97	44.79	44.61	80.8	44.74	18.36	394.94	68.42	7.05	51.71	-0.154478			RNase_P_Rpp14
TdChr002.1020	30.85	134.26	21.02	20.27	22.52	4.03	5.55	4.15	30.12	0.93	8.88	17.56	13.29	9.35	20.91	9.51	13	8.72	9.02	0.97	14.1	1.46	51.6	2.77818			NF
TdChr004.2090	38.77	150.46	78.93	66.32	40.83	51.16	37.32	20.06	42.8	18.03	18.09	19.34	18.88	17.54	44.76	23.42	27.48	19.69	14.47	16.49	32.57	49.82	51.6	0.67645			1-cysPrx_C,AhpC-TSA
TdChr003.746	72.59	125.41	48.35	76.21	129.94	40.84	68.73	69.46	112.76	67.76	53.01	104.13	109.45	88.41	136.42	72.51	108.57	128.49	120.75	86.1	215.92	15.31	51.57	-0.70829			Ras
TdChr005.1536	169.31	137.67	147.99	97.01	85.93	59.89	158.04	230.81	42.42	263.19	35.54	54.89	37.7	92.13	26.19	37.59	53.82	29.01	42.98	374.13	42.3	3.88	51.42	-0.0327407			PRELI
TdChr001.571	232.58	267.84	123.63	132.17	180.44	126.9	211.6	260.56	328.75	241.31	312.52	473.57	596.85	328.99	465.43	462.4	603.9	693.7	502.3	199.07	579.5	3.45	51.42	-0.772999			GRAM
TdChr001.2305	53.52	16.11	12.11	26.85	15.07	28.99	31.1	44.86	20.92	73.36	19.42	6.45	14.4	35.5	20.67	18.16	13.4	22.2	23.22	9.2	4.06	0	51.39	1.8972			ANTH
TdChr003.2195	20.08	36.47	14.78	25.64	23.24	20.88	22.41	24.15	35.09	24.94	32.06	43.97	29.27	34.02	30.51	25.22	30.63	29.08	39.22	33.63	28.26	16.77	51.34	2.18573			ERO1
TdChr002.1186	427.58	453.94	295.42	185.71	108.99	156.11	502.91	904.11	28.81	914.4	34.74	42.26	105.21	332.76	42.04	49.83	53.06	40.57	30.35	1188.58	63.13	6.69	51.3	-0.159145			TPR_1,TPR_11,TPR_12,TPR_16,TPR_2,TPR_8
TdChr003.1692	3.68	30.06	38.53	124.57	202.24	56.42	175.77	64.07	305	36.2	102.5	96.87	126.14	56.17	544.56	118.61	87.55	149.26	64.09	19.42	158.45	47.53	51.27	-0.409276			4HBT_2
TdChr005.1063	1.09	123.47	34.16	65.68	95.33	9.92	30.12	19.64	148.71	5.18	285.79	83.6	98.28	27.22	166.07	282.18	81.84	98.5	42.94	0.92	25.44	0.03	51.23	0.00131666			AMP-binding,AMP-binding_C
TdChr006.1410	22.17	46.8	26.79	32.46	12.87	6.07	12.5	14.73	3.52	13.45	3.88	6.23	5.2	9.39	12.74	3.74	8.29	5.76	3.3	17.6	4.72	1.36	51.15	3.70279			DRY_EERY
TdChr004.212	180.67	151.39	86.08	101.19	125.05	69.57	76	63.26	119.34	58.9	83.16	90.99	94.97	59.03	98.07	97.77	97.4	96.85	69.39	69.09	109.65	20.59	51.15	-1.30338			DUF2012
TdChr003.1677	94.82	93.22	119.74	70.15	54.33	58.39	69.92	100.55	15.52	122.58	23.62	28.38	33.32	57.12	22.73	20.78	29.42	29.89	21.4	151.01	17.6	0.55	51.14	0.00170619			HGTP_anticodon,WHEP-TRS,tRNA-synt_His
TdChr001.998	108.59	173.56	39.97	62.94	40.09	47.56	134.65	126.26	348.51	121.97	116.94	142.65	119.72	87.94	311.96	235.02	104.42	126.13	65.12	80.14	63.17	1.81	50.87	-0.85363			Fumble
TdChr004.1557	0.78	12.58	0.35	0.73	0.17	3.67	3.09	0.36	3.04	0.11	0.85	0.17	0.55	0.45	6.15	0.23	0.27	0.36	0.32	0.01	0.67	0.15	50.59	27.9889			COesterase
TdChr003.1962	0.39	2.8	0.94	0.22	0.33	0	0.6	0.39	0.16	0.98	0	0	0.61	0.45	0.24	1.24	0	2.71	0.28	0.39	0	0	50.54	63.2075			NF
TdChr004.563	45.7	100.55	165.5	172.96	156.64	89.66	69.63	43.27	105.46	47.02	69.49	51.69	98.03	43.48	150.63	125.87	82.07	113.64	50.4	27.51	102.34	0	50.53	-0.515917			GST_C,GST_C_3,GST_N,GST_N_3
TdChr001.3081	2839.15	223.62	4.72	1.53	0.92	87.85	1035.92	1824.84	57.94	2014.35	40.15	30.26	138.59	690.85	41.81	43.94	23.76	47.83	35.52	1701.41	208.1	177.34	50.43	-0.0176639			NF
TdChr001.2889	197.16	193.82	95.39	92.33	79.69	49.48	65.76	96.19	43.56	152.68	54.38	85	85.19	90.48	83.82	67.85	79.86	72.96	74.42	108.49	76.05	4.01	50.43	-1.0801			YIF1
TdChr002.785	98.43	127.31	129.35	86.56	46.8	51.16	114.72	170.92	32.01	163.4	26.48	49.11	35.99	68.09	40.41	33.65	35.23	20.89	23.87	160.24	26.61	1.09	50.13	0.0151669			AIF-MLS,AIF_C,Pyr_redox_2
TdChr003.1431	139.55	426.21	119.71	142.65	241.92	236.49	124.06	85.74	180.08	88.38	180.34	321.8	224.58	172.65	201.66	205.8	360.16	247.72	205.96	83.14	312.14	64.3	50.12	-1.10816			DUF829
TdChr004.2020	350.39	309.68	238.54	116.73	122.53	207.08	419	686.36	47.39	990.82	41.88	72.54	114.03	348.15	48.3	56.63	91.76	57.74	54.47	1416.72	91.58	12.04	50	-0.233778			CS,SGS,Siah-Interact_N
TdChr004.306	0.2	11.12	11.64	71.32	7.44	2.03	48.26	33.26	152.3	2.72	22.32	145.8	138.62	75.71	88.34	13.66	83.19	122.64	92.07	0.28	4.44	0.23	49.97	0.210322			HgmA
TdChr003.2241	71.78	88.54	101.92	116.46	87.96	43.39	93.61	60.37	106.69	56.31	24.1	56.87	41.16	55.07	35.95	13.49	33.29	21.93	60.35	50.18	12.17	0.31	49.89	-0.112018			ETF_QO,FAD_binding_2,Thi4
TdChr003.599	756.73	188.52	199.59	161.55	212.78	151.04	301.56	355.86	137.27	431.75	102.71	146.51	190.23	278.31	105.37	134.16	166.26	168.35	188.85	479.67	134.49	10.52	49.89	-1.0783			UQ_con
TdChr004.266	454.41	551.86	175.51	113.21	91.5	75.12	111.72	144.42	14.96	109.61	16.1	34.63	27.23	58.95	31.12	17.71	32.89	22.92	22.86	238.1	46.62	13	49.72	0.00114299			NF
TdChr006.042	385.63	442.58	144.17	97.81	77.55	158.9	221.2	94.56	79.06	85.34	33.17	48.7	53.34	76.93	46.02	30.16	74.38	60.01	74.45	112.82	93.82	48.98	49.46	-0.518189			NDUFB10
TdChr005.873	12.4	40.03	76.59	82.28	90.49	61.84	90.21	87.58	51.54	75.36	30.12	60.88	52.11	55.84	39.64	30.56	43.88	40.56	46.91	58.88	38.16	1.7	49.42	-0.0699809			CTD,KOW,Spt5-NGN,Spt5_N
TdChr002.1151	1055.97	439.62	277.29	114.74	100.34	63.95	359.9	584.18	32.4	615.72	22.63	31.2	53.99	224.54	22.62	26.23	24.86	20.81	19.1	775.74	25.97	0.72	49.41	-0.0152755			PA28_alpha,PA28_beta
TdChr004.1257	176.03	208.19	116.58	154	206.79	109.63	206.54	199.89	194.16	152.37	94.11	229.95	164.17	177.75	125.87	136.73	262.7	181.5	237.03	186.74	156.94	60.19	49.33	-1.75797			Ras
TdChr002.823	8.8	2.7	0.21	0.17	0.02	0	0.04	0.03	0.05	0	0.05	0	0.07	0.02	0.1	0.03	0.16	0.07	0	0	0.03	0	49.23	224.045			NF
TdChr006.1818	119.59	137.99	87.65	58.81	66.73	105.46	53.8	66.02	19.64	138.87	33.2	92.59	60.09	67.71	75.95	54.46	83.82	53.16	35.23	110.7	64.1	3.11	49.17	-0.455906			Rotamase_3
TdChr003.1869	136.5	69.88	36.06	39.82	23.8	26.26	44.63	58.84	17.83	63.91	27.8	25.73	30.11	35	41.52	30.94	31.72	32.87	23.74	80.36	26.48	3.97	49.11	0.793204			Prenyltransf
TdChr005.1949	213.44	122.28	167.09	116.65	135.8	60.18	127.94	170.34	66.48	149.45	38.32	81.64	53.65	81.29	89.84	48.31	73.83	47.3	52.44	81.46	41.84	0.48	49.08	-0.431296			HEAT_2,PC_rep
TdChr003.2381	161.91	82.13	59.67	63.62	59.03	41.09	79.64	93.36	53.13	91.78	29	62.97	42.05	59.28	58.47	45.34	75.25	44.57	43.55	120.88	68.05	15.84	49.06	-0.310525			DUF846
TdChr005.1361	135.4	281.7	184.27	110.64	46.94	64	72.34	98.32	11.47	111.16	18.22	17.19	27.66	50.51	38.49	27.77	35.12	12.62	14.43	203.08	23.8	10.79	49.02	0.0260859			Cid2
TdChr002.2468	9.59	2.76	24.71	20.27	31.23	10.47	16.36	26.61	1.52	28.62	3.83	6.6	4.78	13.51	5.45	6.15	6.79	3.65	2.05	30.45	0.34	0	49.01	2.24509			APH
TdChr002.232	67.65	44.78	62.95	66.68	24.83	22.48	60.74	88.29	11.32	84.15	10.07	15.86	16.11	39.18	13.83	9.3	13.94	12.06	11.8	80.79	16.32	0.23	48.78	0.538776			tRNA-synt_1c,tRNA-synt_1c_C,tRNA_synt_1c_R1,tRNA_synt_1c_R2
TdChr003.1529	169.69	14379.1	5701.98	2164.82	0.97	0	1.58	1.02	0.94	0.56	0	0	0	0	0	0	0.16	0	0	0.88	0	0	48.77	34.7929			NF
TdChr001.3542	21.12	63.28	38.49	70.19	54.3	33.8	70.65	44.6	249.78	38.1	23.55	52.69	41.57	46.53	194.03	47	52.34	43.6	47.47	31.32	55.41	1.37	48.64	0.104442			PGM_PMM_I,PGM_PMM_II,PGM_PMM_III,PGM_PMM_IV
TdChr001.3161	24.73	83.52	8.33	12.49	612.45	104.78	99.53	185.12	81.82	258.99	5.61	167.38	439.97	89.38	58.16	20.29	57.52	356.33	2.89	64.95	508.4	0.68	48.63	-0.215094			JHBP
TdChr006.2002	142.92	143.12	89.11	100.95	148.71	101.99	109.39	85.96	150.47	62.41	90.98	232.48	102.73	105.35	74.99	81.84	145.27	70.61	118.09	62.74	34.67	0.72	48.37	-0.90788			SNAP
TdChr006.051	301.9	102.74	56.44	48.31	141.46	123.1	166.48	141.01	109.86	125.11	44.21	128.85	87.64	141.02	61.95	39.15	71.83	58.92	118.66	56.69	20.63	0	48.31	-0.525132			UQ_con
TdChr003.1574	107.43	104.75	45.62	20.99	52.15	35.23	51.18	62.36	26.21	72.66	6.45	21.13	18.09	32.44	7.22	7.21	7.27	16.29	25.17	117.36	18.59	0	48.22	0.639479			FAM195
TdChr002.3248	254.55	214.58	106.52	89.66	64.34	45.57	99.94	150.88	18.39	150.25	35.01	33.29	37.3	49.94	48.65	28.75	41.21	36.03	17.81	253.61	88.4	0	48.14	-0.00604631			LSM
TdChr002.1021	77.38	156.59	58.96	67.93	87.57	46.02	58.81	58.15	129.94	25.67	78.95	165.63	77.32	88.98	111.92	66.95	146.63	78.17	151.27	49.88	105.26	0.96	48.13	-0.580562			DUF1977,DnaJ
TdChr002.1999	3.07	131.82	3.41	0.48	0	0	0	0	0.13	0	0	0	0	0	0	0	0.26	0	0	0	0	0	48.04	163.186			NF
TdChr003.605	437.5	288.71	95.7	108.11	71.92	84.54	85.36	82.58	99.03	124.33	113.59	104.03	78.91	89.54	147.67	187.02	121.72	108.47	75.28	103.06	93.51	73.29	48.01	-1.48911			DUF106
TdChr005.757	674.89	395.87	248.91	117	72.75	97.05	262.4	338.57	26.91	347.58	33.49	55.48	75.22	180.78	47.68	37.28	55.23	62.58	49.51	473.68	63.81	1.18	47.93	-0.1194			Laps
TdChr003.642	110.4	154.16	99.67	73.33	32.79	89.21	51.35	44.16	26.65	54.11	22.58	48.74	44.04	35.82	39.09	27.82	51.04	53.17	40.29	70.53	83.32	4.47	47.9	-0.0214027			TIM21
TdChr002.2629	223.11	189.26	64.73	85.72	72.45	46.29	86.69	87.97	84.9	100.52	42.79	57.94	63.76	72.24	76.84	54.66	54.04	59.7	62.83	120.12	47.12	5.5	47.78	-0.527304			CUE
TdChr002.829	366.02	124.61	227.5	152.61	204.1	133.64	151.68	142.41	46.07	144.63	40.37	148.47	80.5	95.97	73.22	56.34	115.48	59.19	77.42	57.83	31.42	0.83	47.77	-0.53704			RRM_1,zf-RNPHF
TdChr005.1493	19.66	13.55	7.84	15.53	20.07	7.54	36.85	21.62	108.06	16.85	0	14.93	0	16.95	10.95	0	4.97	8.67	12.91	20.62	0	0	47.73	2.50036			NF
TdChr006.674	419.33	182.17	133.61	130.56	219.45	230.4	194.66	199.85	183.98	187.48	250.11	658.1	251.93	233.06	145.57	250.16	518.61	205.67	207.08	180.61	205.79	3.24	47.63	-2.61945			LUC7
TdChr004.1957	574.23	265.52	248.27	181.3	304.22	170.18	308.35	446.76	148.31	425.97	83.87	179.98	170.31	216.2	96.05	84.76	112.58	89.64	120.76	262.85	47.86	7.01	47.55	-0.715469			Metallophos
TdChr004.302	1.84	78.94	2.09	4.66	0.91	0	0.27	0.09	0	0	0	0	0	0	0	0	0	0	0	0	0	0	47.49	68.971			CAP
TdChr006.408	220.52	151.77	124.58	54.6	46.35	82.29	109.87	140.66	31.5	248.08	26.61	46.23	59.7	102.96	68.75	48.86	54.43	45.9	35.58	135.38	60.7	0	47.44	-0.171183			Tim17
TdChr002.3340	116.44	180.14	118.34	83.29	85.5	71.19	74.81	60.6	57.21	65.25	43.74	62.08	67.21	70.41	65.68	75.77	69.59	88.2	56.48	94.45	116.24	27.81	47.34	-0.896915			P21-Arc
TdChr004.2031	47.81	82.68	137.96	112.29	77.2	59.88	90.06	117.81	61.26	132.39	36.97	62.94	50.09	71.61	61.82	47.98	49.81	40.49	36.89	120.12	32.8	0.9	47.29	-0.356372			Peptidase_S9,Peptidase_S9_N
TdChr004.857	60.27	49.71	25.8	29.09	41.4	16.31	33.07	47.51	14.86	73.46	20.14	23.02	19.88	32	26.8	19.83	15.55	12.65	11.3	80.17	27.48	3.81	47.27	0.780201			O-FucT
TdChr005.060	0.9	17.69	18.25	32.44	11.98	14.32	32.42	3.11	19.86	0.66	0.09	8.13	5.99	3.08	15.22	0	9.52	2.69	9.91	0.81	2.6	0	47.24	2.64843			APS_kinase,ATP-sulfurylase,PUA_2
TdChr001.1241	900.34	619.37	370.85	247.66	362.18	180.6	138.07	150.17	51.76	175.49	83.72	94.92	80.76	94.17	68.57	114.54	126.79	101.96	51.24	131.26	114.9	6.94	47.23	-0.704551			NUDIX_2
TdChr005.482	172.39	44.62	133.59	157.33	53.85	36.83	111.7	177.29	24.85	172.58	9.3	40.81	27.2	75.47	18.79	7.76	33.39	12.98	27.3	113.52	11.59	0.05	47.2	0.071405			GATase,GMP_synt_C,NAD_synthase
TdChr003.562	211.48	171.44	94.6	106	68.85	56.98	97.74	117.33	51.29	99.74	42.2	70.88	45.79	62.66	80.86	70.03	56.21	49.75	42.01	211.07	107.11	5.77	47.18	-0.433746			Sep15_SelM
TdChr003.628	1224.3	130.3	328.86	159.08	234.54	65.29	182.5	404	39.63	262.15	22.26	99.89	35.69	128.56	15.47	8.01	10.89	6.02	13.67	116.75	2.92	0.9	47.17	-0.115276			RRM_1
TdChr003.1565	118.05	240.4	31.56	36.13	18.2	23.94	82.7	75.71	119.95	89.76	9	71.49	95.81	78.79	111.9	5.39	46.11	68.47	65.9	93.59	10.86	5.12	47.15	-0.331433			Na_K-ATPase
TdChr002.3499	224.06	217.01	417.93	230.18	183.5	79.68	223.85	298.55	50.72	273.93	31.86	46.92	46.51	107.68	71.05	45.15	61.4	31.41	25.29	271.43	52.21	5.56	47.04	-0.134826			Proteasome,Proteasome_A_N
TdChr003.094	261.38	108.85	57.2	74.99	129.21	95.12	298.06	268.61	357.17	234.86	201.86	370.12	1242.04	1344.42	217.26	241.66	319.9	999.58	2212.03	205.03	857.88	1.73	46.91	-0.795415			Pkinase
TdChr005.310	30.21	64.75	51.36	102.06	157.58	39	40.73	48.33	141.79	28.96	94.16	109.11	122.62	89.56	229.99	82.75	136.09	149.79	152.16	35.05	79.04	2.51	46.9	-0.417445			CD36
TdChr004.1215	363.84	267.42	169.32	127.36	174.27	108.93	132.6	138.25	80.6	165.13	57	147	113.55	131.57	100.89	76.19	120.83	106.5	142.22	156.57	95.47	0.19	46.89	-1.49651			Arm,Arm_3,IBB
TdChr005.2163	36.61	119.88	25.2	53.49	408.89	151.48	82.02	68.23	203.52	63.52	97.9	343.85	175.57	148.42	284.61	117.95	356.51	201.05	437.31	32.52	204.31	71.26	46.82	-0.52816			BNIP3
TdChr003.1691	0	11.98	19.32	22.63	39.59	78.11	27.21	8.38	64.32	0.42	7.46	74.26	11.29	12.56	6.97	3.86	10.84	3.02	20.48	1.79	1.58	0	46.72	1.64643			Tetraspannin
TdChr002.2771	0	8.48	0	6.98	16.28	0	0	0	16.87	0	0	0	0	0	0	0	0	0	0	0	0	0	46.61	467.1			TIL
TdChr004.849	246.39	231.88	123.4	96.65	84.63	63.1	100.3	113.73	72.43	148.6	70.49	88.1	88.45	91.35	88.81	106.82	114.89	78.04	61.67	213.68	149.92	93.17	46.53	-1.22764			Rer1
TdChr004.361	27.55	46.49	69.87	56.69	40.72	27.23	64.28	74.75	82.78	71.39	15.75	33.03	33.6	38.71	56.75	18.24	25.91	24.15	24.98	51.51	48.42	0.39	46.25	0.186116			IQ,Myosin_TH1,Myosin_head
TdChr005.2208	14.81	4.04	13.13	16.85	16.83	1.5	2.87	0.5	4.8	0.05	0.07	2.6	0.51	1.14	1.68	0	0.86	0.19	0.98	0.09	0.06	0	46.21	10.3128			zf-C2H2
TdChr002.2609	132.09	77.5	69.98	63.2	55.49	55.84	116.51	137.88	81.46	218.39	37.75	77.21	70.17	127.42	68.56	56.36	94.31	127.69	75.9	258.12	115.69	12.46	46.01	-0.499318			Fis1_TPR_C,Fis1_TPR_N
TdChr005.1193	125.99	109.26	57.92	66.51	77.72	64.32	76.07	84.82	95.24	92.42	78.68	124.89	110.93	92.47	131.97	127.19	119.01	132.92	108.4	100.91	93.82	0.24	45.9	-1.25265			UBX
TdChr003.208	163.77	124.61	119.87	78.34	68.79	61.39	155.61	213.5	33.32	207.58	26.48	55.18	62.76	92.92	44.9	28.65	49.47	46.72	36.34	198.63	53.41	3.15	45.87	-0.200377			DFRP_C,Torus,zf-CCCH
TdChr003.813	91.42	115.65	42.13	53.6	27.06	16.24	51.5	64.31	31.94	90.94	28.63	36.12	25	48.65	22.82	27.21	28.68	19.83	23.38	74.55	12.15	4.19	45.86	0.492621			zf-RING_2
TdChr004.1921	180.74	116.15	76.41	85.54	90.89	47.53	70.16	92.87	60.91	107.72	74.45	98.52	74.43	83.05	72.58	92.69	74.72	64.94	74.23	91.73	59.55	1.04	45.84	-1.16236			EMP70
TdChr003.441	245.99	107.32	91.09	82.71	68.4	29.57	95.52	159.17	24.85	152.81	20.38	42.23	29.63	67.39	28.11	24.99	31.17	20.65	23.19	175.07	22.05	7.65	45.8	0.0535884			Arf
TdChr003.1813	6.62	225.76	49.25	69.9	52.73	17.08	29.77	18.02	89.18	5.55	8.51	162.32	33.38	73.11	124.66	9.43	117.87	26.85	58.96	2.59	54.66	12.58	45.76	0.00176134			adh_short,adh_short_C2
TdChr001.3591	237.65	172.67	54.85	47.21	27.78	40.03	68.05	84.72	20.56	102.15	18.76	14.06	34.82	58.65	45.18	26.44	19.95	37.59	24.01	166.61	39.31	0.16	45.73	0.151733			Jagunal
TdChr002.864	26.78	46.65	26.4	11.05	6.59	11.44	28.74	42.42	19.66	52.26	10.02	96.96	27.16	44	7.85	13.93	72.01	23.28	26.89	58.33	30.81	0.26	45.71	0.586303			MMR_HSR1
TdChr004.258	11.87	87.27	107	228.39	161.25	48.33	37.62	32.4	22.2	36.19	6.47	19.56	9.66	20.09	40.25	9.67	32.15	10.76	14.16	47.22	7.61	12.81	45.67	0.398187			DeoC
TdChr002.2300	135.1	146.78	81.61	115.37	90.96	61.23	82.24	52.5	113.47	44.69	70.85	245.44	77.79	83.22	64.26	87.09	218.29	70.74	99.44	58.93	48.78	14.68	45.62	-0.772243			DUF1681
TdChr006.1968	14.34	125.14	306.5	817.2	382.1	206.73	300.27	98.56	165.36	104.46	89.19	86.03	113.01	67.43	156.09	133.75	101.25	105.76	56.57	60.78	107.9	1.06	45.59	-0.714311			Iso_dh
TdChr004.115	257.51	431.06	162.6	105.86	94.84	216.12	258.74	115.18	104.53	109.3	56.78	110.4	101.83	111.66	81.81	64.33	99.69	86.25	97.79	164.55	169.35	143.5	45.52	-0.945368			CHCH
TdChr002.566	149.27	144.86	118.25	137.89	399.92	162.6	224.42	143.72	260.58	92.64	92.73	289.41	258.44	221.5	320.44	183.8	371.97	266.52	372.92	105.77	196.91	0.15	45.52	-1.01918			N_BRCA1_IG,UBA_4
TdChr004.159	52.11	63.89	60.34	104.93	60.68	43.1	77.28	77.61	112.39	77.54	56.73	91.59	101.06	84.64	148.15	96.48	94.48	108.58	112.8	81.01	114.75	1.74	45.49	-0.831748			CTP_transf_like,CoaE
TdChr002.3259	76.49	332.43	118.45	123.48	111.51	68.1	115.51	68.3	225.53	47.6	89.72	196.65	114.37	211.13	286.68	106.56	231.08	120.1	384.23	82.15	159.43	13.33	45.45	-0.561161			RUN,SH3_9,polyprenyl_synt
TdChr006.211	84.66	91.82	34.45	27.47	53.54	23.91	68.66	125.55	19.9	114.1	24.18	29.37	23.76	49.65	8.75	9.15	11.72	9.3	13.11	122.42	4.72	0.36	45.44	0.370401			Galactosyl_T
TdChr006.1612	155.58	220.96	138.18	125.62	104.12	218.27	392.38	155.05	325.15	122.22	95.09	165.24	393.83	1642.03	107.34	98.12	215.42	383.94	2402.95	161.35	831.33	8.33	45.43	-0.482855			2Fe-2S_thioredx
TdChr004.075	327.75	64.96	218.65	140.32	276.33	125.95	215.36	341.63	98.76	230.74	46.97	90.84	67.46	121.95	62.37	39.14	47.59	39.74	56.17	114.15	26.92	0.31	45.42	-0.346854			E1_4HB,E1_FCCH,E1_UFD,ThiF,UBA_e1_thiolCys
TdChr004.788	38.66	58.94	63.25	93.38	197.95	71.26	162.48	162.27	125.06	74.59	44.4	146.18	65.66	81.84	58.21	63.7	145.47	66.67	72.72	226.49	68.39	1.5	45.41	-0.346708			Yippee-Mis18
TdChr002.2573	4.14	2.76	3.01	3.11	42.58	2.19	4.06	1.56	15.53	0.8	9.56	31.06	13.17	8.42	71.42	44.53	51.18	31.26	32.11	0	25.78	0	45.35	1.24187			Histone,Histone_H2A_C
TdChr002.996	334.44	254.43	213.15	220.43	202.97	151.66	187.3	182.28	145.73	165.54	57.92	225.34	112.85	143.41	63.9	57.72	157.93	87.07	141.71	154.06	48.38	2.59	45.33	-0.887098			Adap_comp_sub,Clat_adaptor_s
TdChr005.1270	278.71	36.29	214.07	283.7	68.41	44.81	104.94	146.3	57.52	101.88	30.54	73.21	154.08	145.7	33.05	19.45	40.92	70.54	147.69	77.27	74.03	0.13	45.32	-0.269192			Diphthami_syn_2,Ribonuc_L-PSP
TdChr001.1084	330.17	278.89	157.42	131.11	152.88	99.41	169.57	218.27	111.19	181.07	67.06	89.12	54.9	81.66	112.45	75.48	106.91	93.66	62.02	292.6	115.78	59.19	45.24	-0.774478			UPF0139
TdChr005.1589	244.73	270.19	186.93	73.84	52.89	110.77	157.96	184.13	49.6	212.74	63.73	116.15	160.93	212.88	153.09	101.82	131.52	158.66	189.09	167.8	130.41	0.36	45.14	-1.10276			Tim17
TdChr003.1738	216.87	33.61	0.13	0	0	2.21	18.71	35.17	0.12	42.29	0.25	0.31	1.58	9.05	0.18	0.51	1.03	0.42	0.14	55.12	1.22	0	45.12	1.6931			NF
TdChr001.248	56.98	34.62	16.61	17.87	66.62	32.6	26.84	27.99	20.57	39.96	11.18	21.46	16.16	20.09	29.78	17.82	22.8	15.84	15.67	34.06	8.77	0.53	45.07	1.39102			MFS_1
TdChr002.3511	184.38	54.38	178.87	133.03	163.66	97.73	116.99	66.33	82.04	14.24	44	160.22	55.02	37.3	33.93	23.51	32.39	22.21	47.04	30.55	11.09	0.2	44.97	-0.0259245			LRR_4,LRR_9
TdChr004.447	6.28	43.42	18.41	35.98	132.69	120.49	105.33	90.14	255.85	68.5	113.94	441.86	389.3	327.18	446.41	124.06	316	146.02	302.78	21.47	387.7	1.07	44.85	-0.284675			BPL_LplA_LipB
TdChr004.1041	244.14	334.44	107.15	80.3	60.22	74.56	78.09	72.12	45.68	101.57	58.8	112.82	81.41	73.59	89.09	74.1	109.87	86.62	68.77	112.17	136.67	46.51	44.84	-0.926503			Ribosomal_L27A
TdChr002.507	725.33	79.67	91.82	88.07	331.58	103.91	281.96	383.54	112.91	316.27	25.21	60.98	65.09	149.63	54.04	20.22	35.02	28.97	78.59	104.17	24.59	1.69	44.82	-0.379989			zf-A20,zf-AN1
TdChr005.1061	106.87	85.38	123.82	107.97	126.2	156.96	157.58	152.34	52.84	258.11	76.51	139.88	126.23	182.82	83.46	123.97	142.38	138.12	82.09	270	83.95	0	44.79	-1.24037			NF
TdChr004.1264	79.86	130.88	98.88	86.12	94.08	93.24	87.81	91.38	59.33	90.29	35.38	81.1	66.1	76.26	58.87	57.34	84.77	73.52	55.29	115.92	134.05	14.53	44.77	-1.08766			Cupin_8,JmjC
TdChr001.802	19.47	20.34	85.23	118.89	366.31	77.11	120.33	94.17	227.58	60.8	85.66	196.47	117.99	95.86	44.78	71.8	85.54	72.45	82.69	84.4	113.27	4.97	44.69	-0.818127			RTP801_C
TdChr005.2134	558.88	107.62	39.08	20.47	69.24	58.57	375.94	716.11	75.67	663.12	32.7	160.74	141.95	412.35	53.42	24.37	117.59	83.88	335.85	348.71	35.75	0.24	44.68	-0.130116			UBA_4
TdChr005.1768	523.61	343.71	178.51	107.26	128.06	74.37	227.35	355.86	60.21	424.94	54.59	172.84	143.22	267.96	90.56	96.34	176.43	164.85	162.26	474.31	119.28	28.91	44.56	-0.762127			Endosulfine
TdChr006.1208	317.08	333.01	126.72	107.89	113.8	98.8	125.88	163.23	49.83	204.09	42.45	95.11	86.43	139.66	53.75	57.3	90.63	80.02	81.41	310.41	128.03	28.02	44.56	-0.829287			WD40
TdChr006.894	59.29	127.33	100.68	108.39	86.61	293.89	284.19	113.9	248.03	132.74	186.36	468.65	966.12	2702.53	252.06	240.7	572.71	1020.43	3676.6	91.71	892.25	82.2	44.55	-0.470997			CI-B14_5a
TdChr002.814	35.82	58.61	41.18	52.05	8.74	10	71.82	115.28	50.55	114.78	43.19	31.42	32.92	57.19	40.81	8.18	10.78	16.88	18.24	132.64	9.8	0.53	44.54	0.0936659			FA_desaturase
TdChr004.1577	306.15	285.94	177.28	125.02	91.92	111.07	142.01	154.12	42.32	157.69	39.32	77.22	72.17	79.43	86.21	52.02	90.6	59.89	51.53	225.88	90.87	16.24	44.53	-0.498536			Ribosomal_L30
TdChr005.1793	102.54	197.75	62.6	72.11	96.79	79.28	217.41	152.57	378.28	80.28	139.43	351.38	815.89	1836.64	182.65	183.5	363.77	931.61	2630.69	92.3	810.53	33.28	44.5	-0.484667			Mlf1IP
TdChr005.1052	250.98	215.62	121.76	97.05	107.44	81.94	85.81	75.67	68.94	98	57.96	152.7	117.38	103.93	85.46	69.78	128.91	99.39	112.31	112.62	109.04	3.04	44.5	-1.50957			Arm,Arm_3,IBB
TdChr003.061	0.14	7.02	1.77	4.57	33.94	11.22	22.86	20.36	120.11	9.22	41.94	45.85	68.73	78.78	258.04	109.33	47.23	113.11	101.14	0.67	49.93	73.12	44.44	0.00151906			Inhibitor_I29,Peptidase_C1
TdChr003.2208	0.66	10.35	7.01	15.76	67.25	9.4	25.62	11.57	75.61	3.31	118.39	76.18	204.54	27.68	94.18	73.4	77.59	251.53	55.14	1.16	141.16	0.05	44.38	0.00149009			EcKinase
TdChr004.358	106.26	52.55	42.83	77.78	63.09	81.1	87.12	119.78	49.7	164	74.92	65.1	68.84	95.79	71.81	89.79	83.81	62.31	55.55	189.68	63.02	4	44.37	-0.922869			Malectin
TdChr005.1065	5.58	7.24	79.55	65.57	77.55	13.86	28.48	56.17	16.19	93.32	36.19	80.79	60.98	75.94	23.27	27.58	42.18	44.03	72.54	12.34	53.46	0.12	44.34	0.0082954			RRM_1
TdChr004.577	47.18	118.09	82.24	79.78	53.04	39.59	34.32	38.45	30.94	61.4	26.61	66.79	41.97	41.21	44.62	40.37	78.77	43.05	30.76	70.06	45.6	2.03	44.34	0.00397219			Metallophos_2
TdChr002.1030	3.89	27.25	5.11	33.33	131.47	36.91	59.33	68.16	355.78	43.61	594.66	148.97	328.52	125.07	848.76	1198	134.55	444.95	193.5	25.89	285.44	2.94	44.33	-0.296514			p450
TdChr002.3263	119.73	149.83	121.82	121.51	100.83	293.31	318.1	122.9	209.04	114.28	83.62	147.18	139.97	264.88	118.11	102.42	177.87	154.26	336.4	140.97	284.85	32.07	44.32	-1.23513			NF
TdChr002.798	375.11	433.87	79.09	74.86	51.01	176.46	164.84	60.56	89.63	98.15	84.6	107.76	135.18	145.87	91.2	94.78	138.18	142.58	148.47	61.66	196.61	201.77	44.15	-0.847817			Complex1_LYR,Complex1_LYR_2
TdChr001.1041	164.46	377.71	158.37	118.2	98.57	242.01	277.26	119.97	129.93	181.22	106.22	140.13	149.45	145.87	153.05	132.65	181.34	145.27	162.79	156.59	187.11	8.64	44.13	-2.19254			NF
TdChr002.2740	0	0	0	11.67	4752.16	74.38	13.03	0	84.25	0	0	17.84	0	487.4	34.12	0	34.71	0	550.23	0	9.34	0	44.12	0.882703			NF
TdChr002.354	29.06	23.59	27.95	30.97	49.74	34.21	50.13	56.24	58.04	21.98	27.44	49.49	26.42	31.16	14.61	19.92	13.82	9.54	19.57	21.25	6.25	0.02	44.08	0.858462			Oxysterol_BP,PH
TdChr002.567	52.9	111.91	175.62	96.53	23.64	16.14	75.16	111.18	4.73	132.42	16.56	2.94	15.42	49.88	4.71	14.84	4.98	5.42	1.3	144.23	5.58	7.06	44.08	0.34334			Thymidylat_synt
TdChr003.534	31.44	122.29	113.62	90.92	55.82	250.65	257.71	97.59	228.22	67.93	57.84	121.25	159.14	816.89	65.01	65.26	125.04	155.87	1143.94	83.08	338.25	53.73	44.08	-0.53978			Sdh_cyt
TdChr001.450	25.31	43.01	55.91	50.22	37.47	74.79	64.02	71.48	15.2	108.36	11.76	22.1	35.32	63.58	30.09	20.44	30.96	21.56	23.19	107.76	37.83	1.12	44.05	0.17957			NF
TdChr004.617	32.6	15.95	19.96	18.59	39.26	32.07	53.97	52.69	109.81	28.77	14.93	52.94	34.51	40.2	48.16	12.73	26.55	18.37	34.74	21.11	18.39	0.03	43.87	0.503278			HLH
TdChr002.2871	6.73	18.06	25.88	30.17	38.68	33.23	84.48	99.39	42.99	146.13	47.34	51.01	47.43	81.97	42.53	91.46	49.18	77.82	59.4	246.46	156.26	26.29	43.77	-0.0751531			PTPS
TdChr002.2676	0	0	7.79	1.25	0	0	0	1.03	0	0.5	0	0	0	1.07	0	0	0	0	0	0.81	0	0	43.7	58.0132			NF
TdChr003.1763	0	12.28	0.37	0.1	0	0	0	0	0	0	0	0	0	0	0	0	0	0	0	0	0	0	43.68	437.8			NF
TdChr003.1823	0	0.39	0.13	9.76	6.75	0.98	0.33	0.03	0.1	0	7.47	0	0	0	0.1	2.71	0	0	0.06	0	0	0	43.58	55.5669			p450
TdChr006.2202	48.57	91.58	66.39	85.4	121.39	114.38	286.33	48.7	117.04	11.02	8.51	31.02	45.52	24.99	15.98	2.85	5.69	15.74	20.54	12.36	22.64	0.1	43.58	0.204375			CH,EF-hand_6,EFhand_Ca_insen,Spectrin
TdChr006.407	248.33	367.59	121.03	136.71	127.91	117.9	154.91	131.45	174.71	152	125.81	253.54	150.35	163.37	125.36	162.7	261.99	156.45	173.78	160.81	242.26	2.06	43.57	-2.34263			ATP-synt_S1
TdChr003.2016	409.88	193.58	155.28	123.03	168.96	114.49	173.29	197.55	81.07	210.14	54.73	124.63	95.4	124.25	68.69	65.64	99.66	73.17	86.01	231.83	79.85	1.42	43.55	-0.747928			RRM_1
TdChr004.401	47.18	40.41	19.8	20.23	37.41	29.46	27.1	28.26	38.8	23.34	24.54	36.26	28.11	24.52	18.34	18.26	17.41	20.84	30.28	18.6	12.21	0.49	43.42	1.33945			PHM7_cyt,RSN1_7TM,RSN1_TM
TdChr002.279	0	0	41.39	36.71	0	0	0	0	0	0	0	0	23.14	0	16.89	0	0	39.16	0	0	0	0	43.39	5.08953			cwf18
TdChr003.335	100.19	135.22	103.22	50.61	41.9	76.31	89.35	121.87	20.43	154.05	13.54	22.22	28.45	58.44	35.3	20.15	38.04	33.24	26.3	181.54	38.96	0	43.36	0.0231128			DUF3767
TdChr003.1822	5.34	44.54	17.94	19.74	51.89	11.26	15.03	1.85	103.94	0	135.9	0	11.68	12.78	25.05	15.16	18.99	39.77	46	0	31.96	0	43.14	0.760788			NF
TdChr005.2055	0	2.05	0.39	2.42	1.73	0.16	0.89	0.73	1.27	0.47	0	0	0	0.25	2.87	0	0.54	0.12	0.35	0.74	0	0	43.12	36.2966			FR47,Gly_acyl_tr_C,Gly_acyl_tr_N
TdChr002.1391	70.19	98.92	67.67	61.31	46.19	20.54	32.52	32.47	23.02	31.63	18.69	48.98	28.36	27.28	28.66	28.68	58.38	24.88	22.76	62.38	41.7	6.51	43.11	0.387726			Glycos_transf_2
TdChr003.2166	210.46	341.96	93.29	100.89	64.67	33.23	82.26	123.6	55.19	158.46	45.41	79.48	58.06	93.08	68.24	55.18	74.89	54	73.21	139.91	47.42	28.14	43.1	-0.70446			EF-hand_1,EF-hand_5,EF-hand_6,EF-hand_7,EF-hand_8
TdChr004.1434	108.34	271.64	116.51	114.04	156.57	85.35	68.68	42.59	41.04	31.76	21.78	44.61	43.84	31.98	77.57	25.79	39.95	44.34	31.47	51.46	53.84	2.42	43.08	-0.0254414			WD40
TdChr002.2823	115.92	172.43	130.79	241.23	76.49	92.84	68.28	49.66	65.91	57.51	10.16	100.01	22.58	47.85	55.8	12.91	95.7	16.94	43.52	58.11	35.23	0.96	43.04	-0.260161			ATP-grasp_2,Ligase_CoA
TdChr005.207	654.68	109.38	223.08	164.86	317.7	176.48	283.62	370.81	111.09	312.08	95.52	327.8	130.22	209.97	95.43	83.04	187.15	89.38	138.5	116.41	67.55	0.61	43.03	-0.603703			-
TdChr003.1556	190.56	198.13	104.93	139.18	255.63	130.64	151.12	141.75	215.03	115.34	125.17	308.45	174.49	179.85	152.15	113.8	184.33	133.51	244.13	110.86	72.95	12.9	42.98	-1.35211			Ras
TdChr006.785	15.38	41.91	16.81	39.26	32.42	35.37	18.38	9.34	13.67	11.2	8.65	11.73	14.4	8.91	20.49	7.61	15.67	11.25	8.32	10.77	14.36	1.19	42.97	3.02848			Pyr_redox_2
TdChr005.1989	222.91	46.73	151.95	145.48	340.54	309.43	351.37	242.7	337.89	81.04	109.15	303.43	270.67	216.57	116.96	60.31	87.87	84.66	241.99	102.57	47.05	0.03	42.93	-0.589013			DUF4603
TdChr005.1347	0.03	5.1	3.78	21.1	25.73	8.17	15.46	13.07	72.51	2.69	18.52	75.51	90.14	51.29	49.14	17.67	55.58	68.73	84.2	1.08	62.71	0.05	42.77	0.4138			ANF_receptor,Pkinase_Tyr
TdChr002.1401	21.03	27.65	2.35	17.06	0.51	1.03	15.2	23.77	8.69	29.91	4.88	3.01	11.84	9.01	7.61	2.11	3.39	3.98	4.93	37.18	2.87	4.61	42.74	2.20947			NF
TdChr004.117	61.57	77.96	104.64	93.97	112.74	66.13	80.68	67.51	67.71	55.5	53.71	139.64	70.71	71.15	58.59	81.77	153.91	76.04	102.14	67.11	69.71	5.46	42.63	-1.16003			PCNP
TdChr005.1864	329.8	314.37	236.74	192.02	539.27	225.23	422.57	370.8	213.32	353.05	39.48	192.42	101.15	153.45	114.76	71.38	203.66	87.41	104.25	431.09	110.58	42.64	42.59	-0.682188			EF-hand_1,EF-hand_6,EF-hand_7,EF-hand_8
TdChr006.1098	360.97	259.67	301.53	113.55	66.2	49.88	176.81	249.59	10.9	256.25	11.73	21.77	33.36	89.53	17.17	15.33	16.23	13.88	11.28	346.5	20.01	3.22	42.49	0.000506278			NOP5NT,Nop
TdChr006.631	58.73	54.18	82.41	87.07	220.26	248.86	95.76	43.18	198.69	46.2	67.37	498.36	273.87	120.67	131.83	95.53	375.68	207.17	242.05	22.29	132.17	0.36	42.4	-0.33846			NF
TdChr002.812	717.71	59.79	92.26	190.65	500.72	67.4	642.62	1207.4	488.2	1280.7	88.4	1375.02	264.45	882.84	539.82	191.48	634.27	156.91	847.31	807.52	185.87	0.55	42.4	-0.698447			FA_desaturase
TdChr001.3323	508.5	189.66	99.39	66.29	59.48	71.34	440.63	632.63	60.32	796.98	56.63	113.64	161.87	361.6	105.03	82.32	120.55	114.74	116.58	1043.79	157.56	4.74	42.29	-0.34966			Cyclin_C,Cyclin_N
TdChr006.1482	89.69	145.19	237.54	104.12	45.81	46.06	85.85	77.27	9.14	69.07	18.56	21.6	25.44	33.14	31.97	18.97	33.13	33.05	20.35	121.4	32.89	0.76	42.28	0.158927			Ribosomal_L7Ae
TdChr002.2661	89.56	38.05	120.86	112.9	150.14	91.54	142.12	202.84	102.91	148.58	43.17	114.44	67.73	115.18	35.47	34.99	74.52	48.87	116.62	86.93	38.55	0.15	42.25	-0.644153			Clathrin,Clathrin-link,Clathrin_H_link,Clathrin_propel
TdChr004.1833	297.01	175.64	179.24	101.24	71.84	115.38	166.64	245.9	39.47	358.5	62.05	99.66	104.19	182.68	65.24	69.41	94.09	63.27	70.66	237.55	50.86	2.15	42.24	-0.50598			AD
TdChr001.153	52.75	93.19	81.69	59.79	41.76	34.33	58	55.96	82.79	65.27	42.15	37.17	42.11	41.22	94.44	52.79	41.64	38.54	29.53	70.43	61.15	1.2	42.19	-0.478062			URO-D
TdChr001.1505	114.32	226.53	122.79	94.62	119.77	87.82	95.21	97.27	33.3	110.31	35.08	61.47	48.66	61.71	44.05	52.35	67.11	43.2	33.27	218.07	88.65	27.19	42.13	-0.412843			Ribosomal_L17
TdChr004.100	3.46	63.26	46.32	88.3	89.25	27.29	26.88	15.35	80.25	4.77	129.03	51.91	45.95	27.14	112.98	95.08	109.24	54.78	58.33	5.37	82.5	8.43	42.11	-0.16584			DUF1907
TdChr002.524	265.88	171.95	166.96	125.62	129.71	57.24	114.5	129.31	71.33	115.45	31.47	75.93	54.4	69.71	76.67	40.91	65.04	44.78	47.55	88.05	39.61	0.69	42.1	-0.391164			PC_rep
TdChr004.1770	90.33	24.55	1.89	0	0	0	0	0	0.26	0.5	0	0	0	0	0	0	0	0.48	3.74	0	0	0	42.08	71.4915			NF
TdChr003.1291	73.43	106.18	44.37	54.6	47.18	63.84	60.35	68.76	54.38	69.09	51.13	99.01	76.07	65.28	92.79	71.94	93.35	77.28	85.03	63.26	102.34	45.58	42.08	-0.993088			Mito_carr
TdChr006.1587	93.86	48.41	44.81	42.68	44.94	15.59	58.81	98.59	40.34	101.45	31.26	33.53	21.39	53.49	21.81	23.53	18.89	14.01	32.57	125.86	12.56	0	41.95	0.0580645			DUF229
TdChr001.2486	80.65	163.69	91.98	74.92	67.47	57.68	37.41	44.34	17.61	48.81	9.85	28.67	14.64	27.72	14.68	12.71	35.09	13.61	13.53	60.59	14.86	4.01	41.93	0.155693			tRNA-synt_1b
TdChr005.392	120.85	53.54	76.69	47.29	128.05	62.91	139.27	220.47	97.35	289.16	62.38	149.06	82.86	154.39	122.2	46.5	96.98	59.61	86	134.74	8.24	0	41.93	-0.586893			MFS_1,Sugar_tr
TdChr002.631	263.35	174.88	80.66	195.72	344.78	349.35	468.61	416.37	793.56	231.04	462.46	931.32	917.12	560.93	1116.39	1010.45	1226.67	1153.11	759.05	239.28	629.25	27.67	41.86	-0.67792			DUF2615
TdChr001.2582	1.99	0.32	27.03	22.09	69.13	21.75	20.85	26.03	29.71	22.1	25.66	57.07	65.76	36.23	29.75	25.63	34.45	54.51	67.93	11.93	27.22	0	41.84	0.866105			Ets,SAM_PNT
TdChr005.456	89.86	31.69	35.65	88.97	37.74	26.29	54.27	59.55	51.42	54.45	31.7	53.68	33.88	38.35	38.31	39.55	45.37	34.29	31.69	41.97	27.11	0.27	41.84	0.180765			Glyco_hydro_47,PA
TdChr006.039	56.67	47.24	10.32	21.4	43.64	50.18	88.07	117.51	73.51	130.06	35.84	64.9	124.06	99.94	88.44	34.34	64.24	98.06	98.44	55.19	62.5	0.59	41.83	-0.406401			C2,RBD-FIP
TdChr006.592	256.99	229.63	137.61	106.63	158.37	91.05	111.5	113.03	91.76	125.21	44.14	123.06	76.02	83.58	118.04	78.4	148.93	84.91	87.14	106.09	82.34	7.83	41.8	-1.55518			Proteasom_Rpn13,RPN13_C
TdChr006.1555	8.94	29.18	29.22	36.36	22.51	13.27	21.65	22.98	14.58	26.19	16.74	25.58	15.11	13.85	30.26	17.55	16.95	14.22	10.17	19.06	20.23	1.88	41.68	1.96116			Coprogen_oxidas
TdChr005.003	335.95	28.13	147.27	89.7	189.84	165.11	239.53	284.86	40.5	287.9	43.48	131.42	94.43	156.28	62.18	43.35	87.31	53.57	88.19	109.36	33.67	1.1	41.55	-0.409354			DUF1897,KH_1
TdChr005.1745	51.97	38.1	39.97	34.99	68.75	43.62	133.17	197.87	88.38	224.22	29.88	101.77	83.59	110.61	59.53	31.83	55.43	58.07	95.22	68.31	29.8	0	41.39	-0.313629			Pkinase
TdChr005.2044	251.8	208.74	107.56	119.55	184.73	95.61	100.21	112.39	70.22	120.82	65.22	138.09	133.64	160.13	83.53	68.29	121.84	124.89	190.27	117.67	95.24	9.35	41.31	-1.63718			Ras
TdChr006.201	304.95	198.77	186.71	131.39	96.21	84.8	169.62	205.84	54.48	241.89	32.5	74.17	55.47	101.73	53.17	35.25	81.72	45.91	47.21	260.32	67.83	6.38	41.3	-0.314816			Acetyltransf_1
TdChr005.1524	189.34	241.25	175.64	142.45	144.9	94.6	107.72	137.42	39.39	150.56	41.17	100.8	114.06	93.04	75.78	57.54	119.16	115.14	95.13	201.19	125.17	21.06	41.29	-1.22412			dsDNA_bind
TdChr004.1134	342.76	339.01	140.19	96.95	124.82	66.82	133.76	162.03	62.41	150.21	35.53	85.56	67.79	100.38	65.94	50	88.26	66.39	61.63	182.08	85.24	9.67	41.28	-0.606036			WD40
TdChr006.019	74.63	22.47	35.78	41.86	35.18	29.62	105.29	154.1	72.29	129.12	15.7	30.86	91.21	85.67	54.2	17.66	29.29	43.33	76.08	43.23	15.51	0	41.2	-0.0121739			FOXO-TAD,FOXO_KIX_bdg,Forkhead
TdChr002.109	89.42	93.88	36.29	56.82	48.52	37.06	43.33	53.87	23.19	62.32	22.36	35.8	27.22	34.08	25.64	27.5	37.92	23.38	21.54	69.4	34.98	8.83	41.19	0.201086			DUF773
TdChr002.3022	41.95	67.25	29.86	55.66	29.05	56.9	103.55	57.88	181.5	49.9	51.1	129.18	149.12	190.21	213.67	66.68	136.77	167.83	296.61	43.51	172.2	12.44	41.19	-0.22696			PGM_PMM_I,PGM_PMM_II,PGM_PMM_III,PGM_PMM_IV
TdChr003.2049	0.46	23.9	0.34	0.76	1.36	0	0.26	0.23	0	0.16	0	0	0	0	0.07	0	0	0	0	0.19	0	0	41.16	103.15			Hemocyanin_C,Hemocyanin_M,Hemocyanin_N
TdChr003.2084	1.74	6.19	1.48	1.93	5.37	6.71	27.57	19.75	59.15	11.11	10.73	58.93	43.42	40.97	13.47	10.93	31.14	39.18	71.87	7.46	20.16	0	41.14	0.823425			MFS_1,MFS_4
TdChr004.1066	189.61	168.19	114.46	111.5	152.57	108.92	139.83	158.29	75.7	183.38	69.6	123.83	91.62	116.08	99.31	91.46	139.03	94.05	87.58	213.66	83.91	45.14	41.1	-1.23811			GPP34
TdChr005.232	33.73	24.9	39.72	33.34	28.5	50.92	74.24	104.37	37.75	91.49	33.62	42.44	45.53	56.22	34.57	50	31.35	31.45	28.42	43.41	24.55	0.17	40.97	0.20164			HMG-CoA_red,Sterol-sensing
TdChr001.3214	134.8	119.69	88.74	120.81	114.23	48.4	86.31	111.61	85.62	124.84	60.11	116.44	104.37	99.79	79.36	60.7	90.42	104.56	102.42	114.95	66.45	5.92	40.97	-1.40529			PX,Sorting_nexin,Vps5
TdChr005.1303	79.07	40.45	39.9	33.93	50.08	22.71	107.41	190.81	38.46	152.94	11.7	21.98	28.39	65.05	37.89	14.45	13.21	17.52	17.09	251.1	25.05	0.33	40.89	0.0817618			zinc_ribbon_10
TdChr003.1478	110.09	126.57	56.5	60.06	54.5	71.59	91.41	105.09	104.56	116.97	49.85	73.54	62.22	76.11	217.53	78.01	70.29	67.12	60.82	108.76	83.81	0.24	40.79	-0.733955			Porphobil_deam,Porphobil_deamC
TdChr003.077	214.38	169.81	94.5	79.42	65.41	95.89	114.7	107.2	99.1	146.65	79.86	156.82	133.41	127.13	125.99	117.33	129.84	153.38	156.82	127.27	107.66	12.31	40.77	-1.70157			IFRD,IFRD_C
TdChr002.465	6.6	229.65	77.23	81.76	42.32	29.59	31.33	18.05	58.82	14.26	3.92	24.9	21.81	19.44	110.49	3.44	24.49	27.52	43.59	5.8	11.57	0	40.74	0.528865			Aminotran_4
TdChr001.2977	11.21	29.3	41.74	54.54	70.69	24.11	57.43	19.73	106.58	1.46	17.94	92.48	67.89	52.5	32.06	18.05	51.51	41.07	61.37	1.98	32.9	0.26	40.69	0.00268853			HIF-1,HIF-1a_CTAD,PAS,PAS_11,PAS_3,PAS_9
TdChr003.2353	0.06	6.05	0.02	0	0	0.06	0	0.02	0.03	0	0	0	0	0	0	0	0	0.22	0	0.06	0	0	40.66	281.103			NF
TdChr001.2629	64.73	129.78	61.46	62.17	44.34	45.45	51.15	59.41	58.12	76.36	38.91	55.06	63.26	75.93	89.16	61.9	68.18	68.3	83.81	85.96	71.89	8.22	40.56	-1.02894			NUDIX
TdChr004.1913	689.27	509.94	37.34	49.58	112.17	95.61	112.81	185.85	97.57	221.39	53.53	94.2	200.17	134.32	87.17	59.09	139.69	124.94	107.13	104.71	57.76	2.72	40.54	-0.814311			-
TdChr004.760	167.4	237.78	130.97	85.81	57.97	89.42	81.44	86.18	19.97	72.26	19.17	32.58	22.51	49.15	25.78	24.72	25.78	31.85	18.2	177.38	72.63	7.68	40.53	-0.140028			DUF1713
TdChr005.1833	330.42	41.47	1.45	1.1	40.22	7.93	6.61	4.34	0.53	2.45	0.17	0	0.9	1.5	0.91	0.26	0.67	0	0.23	4.79	0	0	40.52	7.11431			NF
TdChr004.2201	80.6	18.37	0	0	0	6.56	21.7	31.06	0.23	61.83	0.59	0	3.22	23.47	0	0.3	0.47	1.24	0	49.47	0.49	0	40.47	1.7624			Spaetzle
TdChr003.814	287.07	46.31	28.64	28.79	43.03	51.89	167.6	203.24	86.05	100.75	8.93	34.04	15.33	47.95	5.25	2.18	4.17	3.77	8.39	84.94	1.25	0	40.42	0.105033			FCH,SH3_1,SH3_9
TdChr002.1399	6.67	33.01	15.08	15.48	14.7	12.98	6.54	5.33	8	6.88	13.16	9.07	8.82	9.42	16.46	6.37	10.4	7.89	5.81	9.59	38.57	13.27	40.37	4.06049			Hydrolase_6,Hydrolase_like,Yos1
TdChr002.1092	4.46	40.49	21.98	286.16	501.14	17.55	29.28	33.82	121.14	4.72	14.56	84.22	81.11	62.55	79.11	21.45	65.11	76.57	101.83	14.59	53.65	0	40.26	-0.00214133			MFS_1,Sugar_tr
TdChr003.2392	22.17	25.16	109.02	272.44	138.16	58.3	138.07	124.02	36.18	119.8	17.6	30.03	24.76	51.85	22.96	19.97	18.6	16.51	7.55	81.69	13.85	0.2	40.19	0.134699			Mito_carr
TdChr001.1009	982.42	443.29	171.55	102.78	91.26	70.74	238.16	379.58	40.88	408.25	38.96	56.08	79.57	158.52	53.52	41.33	59.9	52.4	48.98	675.46	65.76	1.12	40.19	-0.197388			CBFD_NFYB_HMF
TdChr002.3694	19.53	14.71	5.17	8.46	14.93	0.74	3.56	3.24	0.41	2.85	0.06	0.45	0.7	1.18	0.53	0.1	0.25	0.18	0.71	2.46	0	0	40.08	9.53809			SNF
TdChr004.666	0.06	31.53	4.77	15.72	2.63	4.02	3.41	1.59	9.31	0.47	22.4	3.37	4.32	0.91	14.15	1.41	1.99	5.17	1.16	0.63	9.06	0	40.03	4.59			Pkinase,cNMP_binding
TdChr002.043	255.52	60.74	58.06	60.87	62.79	52.44	115.82	176.92	41.34	207.05	32.98	51.7	53.38	93.21	49.23	39.69	45.81	46.46	46.08	109.58	41.99	3.08	39.99	-0.361111			ArfGap
TdChr002.2727	138.06	172.21	68.08	36.79	58.2	55.18	53.78	52.56	52.54	64.28	30.25	92.45	75.5	68.31	54.95	46.07	99.32	110.03	62.55	67.97	110.58	15.65	39.87	-0.716257			-
TdChr006.794	453.2	380.91	253.36	96.44	53.69	73.87	139	201.56	30.44	275.95	19.91	35.37	42.56	106.17	39.14	26.63	40.33	25.38	18.33	339.22	45.49	3.29	39.83	-0.0404437			UPF0160
TdChr003.497	125.28	74.55	163.79	95.19	59.71	51.66	184.58	195.23	31.84	269.49	21.25	39.29	48.26	116.47	22.57	15.04	23.22	22.09	13.91	350.45	29.9	2.6	39.79	-0.0853385			zf-C2H2_jaz
TdChr001.3031	100.97	97.29	49.58	38.31	21.64	35.33	25.94	36.63	16.17	25.12	24.63	51.91	34.54	39.61	23.53	34.04	43.8	41.58	23.52	44.1	34.06	53.19	39.77	0.174946			SNARE
TdChr004.778	218.85	44.72	172.97	67.78	58.45	54.49	183.81	334.32	25.61	333.51	20.45	36.81	47.87	137.72	27.5	18.22	22.96	20.37	22.49	135.97	14.37	0.08	39.72	-0.0428997			HEAT,HEAT_2,HEAT_EZ,IBN_N
TdChr001.2995	1.21	39.67	0.53	0	0.1	0	0.07	0.33	0.22	0.06	0	1.28	0	0	0.06	0	1.05	0	0	0	0	0	39.65	74.8868			NF
TdChr006.2211	10.7	51.49	34.77	53.35	115.27	51.26	86.71	87.14	147.18	73.24	56.03	103.64	152.11	162.15	119.47	54.13	69.94	92.78	177.84	35.75	60.93	0.29	39.65	-0.518907			zf-C2H2
TdChr005.643	32.8	33.73	31.09	53.86	27.93	11.17	23.6	19.4	20.79	18.74	16.74	14.11	10.22	14.41	14.25	23.2	17.54	16.79	9.2	36.38	19.09	29.5	39.54	1.36572			V-SNARE_C
TdChr005.1558	8.81	101.79	52.16	67.53	51.93	18	26.64	25.56	59.56	16.22	52.63	77.45	70.28	55.44	108.84	63.42	94.35	69.7	69.67	18.9	98.21	5.63	39.54	-0.359173			Aldolase_II
TdChr003.960	126.11	192.51	42.57	29.5	78.27	169.03	57.39	58.99	30.79	58.91	30.13	36.18	49.87	191.48	32.66	53.93	72.92	81.28	367.96	92.74	101.73	7.9	39.53	-0.324143			UPF0767
TdChr002.2097	0	2.34	0	1.54	0	0	11.66	7.26	30.21	0	2	144.91	3.05	6.62	0	0	143.38	15.65	7.75	0	14.2	0	39.34	2.84728			NF
TdChr002.2991	7.63	63.04	52.73	42.58	24.15	26.54	41.99	25.86	8.11	9.18	6.1	16.47	13.09	11.47	8.59	9.96	16.28	10.79	14.79	22.12	13.53	0.56	39.3	1.47101			HTH_11,tRNA-synt_2d
TdChr001.115	51.35	84	106.57	99.87	124.14	156.4	226.03	222.44	135.45	265.13	90.9	144.64	186.28	303.47	186.97	111.84	177.54	219.06	351.52	252.6	175.46	27.02	39.3	-0.994644			Pex19
TdChr005.1637	251.87	205.34	176.18	165.85	124.96	125.65	225.2	161.83	308.18	67.57	117.23	231.9	156.18	141.83	76.54	65.19	95.91	82.47	192.91	85.42	41	2.66	39.29	-0.82043			ATP-synt_ab,ATP-synt_ab_N,ATP-synt_ab_Xtn
TdChr006.683	6.54	10.19	13.64	19.75	20.75	29.91	33.6	23.36	70.42	15.04	38.95	36.91	66.39	63.74	134.14	32.01	36.36	56.55	90.18	9.47	29.74	0.19	39.26	0.240118			ACOX,Acyl-CoA_dh_1,Acyl-CoA_dh_M,Acyl-CoA_ox_N
TdChr001.3099	129.67	230.47	68.14	63.88	70.83	57.18	95.73	104.18	71.35	126.5	52.21	90.92	112.6	109.68	71.57	62.83	92.08	127.62	117.81	165.93	149.59	10.26	39.26	-0.937328			Snf7
TdChr003.2270	32.97	73.92	180.12	106.81	195.85	114.04	58.86	50.15	55.28	63.16	52.17	187.25	61.52	62.52	82.12	63.72	86.8	59.61	80.71	20.98	73.23	0.15	39.25	-0.772174			DEAD,Helicase_C,P68HR
TdChr002.1012	190.24	166.22	84.95	88.51	89.47	106.3	99.38	94.29	85.61	104.72	61.89	120.67	63.62	76.25	75.26	90.39	118.05	68.13	51.69	104.94	91.94	48.5	39.25	-1.50805			TPR_19,TPR_8
TdChr001.2705	343.87	216.03	144.16	168.96	138.83	81.45	233.75	218.16	287.08	243.02	95.05	51.91	89.21	101.94	553.62	58.65	52.41	71.68	40	251.65	262.65	1.08	39.23	-0.574083			Steroid_dh,ubiquitin
TdChr001.1167	12.29	18.53	15.35	13.23	11.76	12.02	11.42	11.63	10.29	13.9	2.82	14.2	2.71	9.59	7.81	0.21	8.54	0.69	6.1	15.11	1.87	0	39.17	3.02553			MFS_1
TdChr001.987	94.17	46.64	47.03	43.09	42.81	42.93	88.18	151.24	27.31	192.71	24.58	36.89	42.41	87.29	41.03	29.79	35.24	28.29	25.83	170.15	22.67	0.53	39.17	-0.0821559			DUF1751
TdChr002.131	37.23	18.75	39.76	52.43	59.14	23.59	294.77	51.29	54.54	50.13	9.1	9.22	11.99	51.39	27.07	10.82	7.98	10.76	68.56	26.39	10.5	0.02	39.15	0.299631			Peptidase_S9
TdChr004.707	376.25	198	94.75	102.55	92.76	54.26	106.29	121.46	69.82	127.06	56.41	98.56	81.78	104.91	79.38	70.59	90.83	81.44	96.62	156.94	49.6	12.83	39.08	-1.50951			DER1
TdChr005.909	281.48	441.96	105	61.35	46.46	53.41	61.55	75.29	15.89	93.64	19.19	32.44	29.89	54.22	33.48	21.93	32.25	26.43	23.33	128.55	60.99	37.36	39.06	-0.194927			NIF
TdChr004.1767	14.96	36.54	27.54	74.92	75.89	48.54	71.11	25.27	142.63	12.36	43.17	83.68	52.88	45.46	111.91	51.38	67.79	50.97	63.78	9.21	37.83	1.76	39.06	-0.250067			PhyH
TdChr006.016	48.72	49.53	181.67	87.66	54.78	51.87	109.2	141.53	61.93	114.34	36.05	78.09	60.71	85.63	66.5	52.66	76.73	70.28	53.51	203.59	95.16	1.06	39.05	-0.696904			RNA_pol_3_Rpc31
TdChr006.1692	417.56	327.13	176.29	146.61	323.53	255.4	254.02	257.88	248.22	255.83	190.34	387.69	313.24	307	321.39	213.13	404.64	352.5	630.76	270.86	193.75	209.82	39	-1.91988			Ras
TdChr003.320	1.55	17.94	0.44	0.33	0.48	0.21	0.34	0.22	0.22	0.08	0.33	1.41	0.09	0.5	0.07	0	0.18	0.96	0.31	0	0	0	38.96	76.7327			Serpin
TdChr002.501	131.37	194.08	205.3	110.49	76.25	64.83	88.79	94.95	55.69	161.12	52.08	69.57	86.49	85.32	71.88	67.66	67.56	97.2	35.78	142.52	52.72	35.53	38.94	-0.85178			zf-Tim10_DDP
TdChr003.1091	331.23	92	259.24	153.18	203.97	179.39	378.28	512.05	101.9	400.23	44.92	146.61	89.34	172.63	39.52	31.46	54.98	27.73	61.7	290.98	16.87	1.39	38.89	-0.332005			Caprin-1_C
TdChr001.673	0.66	21.91	58.4	64.11	7.75	0.39	16.97	18.85	112.28	4.75	39.62	87.09	86.24	56.55	150.22	75.03	127.95	177.81	151.73	8.66	85.4	4.49	38.85	-0.237999			p450
TdChr005.277	399.99	211.97	229.91	149.76	270.4	168.62	235.08	304.29	144.97	329.12	106.76	230.83	141.7	191.97	129.59	137.5	221.27	128.28	152.8	144.28	119.75	0.06	38.82	-1.17493			HEAT,HEAT_2
TdChr004.573	207.19	146.93	115.54	81.69	61.85	69.89	90.94	121.7	32.67	146.03	23.72	45.82	48.5	67.99	41.99	28.82	50.74	35.38	39.06	123.91	42.22	0.35	38.77	-0.184245			Peptidase_M16,Peptidase_M16_C
TdChr002.2571	2.85	3.07	0.82	0.83	15.12	6.93	1.76	1.6	4.94	0	7.65	40.56	16.84	26.67	29.29	30.61	43.24	48.07	60.33	5.48	8.14	0	38.69	1.12236			CENP-T_C
TdChr001.2948	231.28	93.97	95.68	78.4	69.68	64.65	109.26	160.36	40.26	193.99	30.02	76.32	78.38	116.61	62.55	42.14	73.27	62.04	81.15	174.39	41.28	0.84	38.69	-0.743463			TFIIA
TdChr002.2120	160.12	102.72	82.07	70.96	37.35	30.28	65.58	88.06	29.82	104.22	20.04	53.11	30.58	52.25	21.15	15.13	34.68	15.19	23.18	103.97	5.98	1.16	38.68	0.0262626			Peptidase_M28
TdChr005.151	1.15	117.99	3.13	0.18	0	0	0	0	0	0.17	0	0	0	0	0	0	0	0	0	0	0	0	38.42	208.216			NF
TdChr003.898	594.17	150.7	151	101.11	131.53	79.89	305.39	465.48	51.86	467.92	42.09	86.13	94.82	185.42	60.03	55.86	74.28	69.75	57.03	514.53	88.23	1.15	38.42	-0.452815			RRM_1
TdChr004.1730	34.34	30.46	17.43	31.25	43.22	39.74	61.08	19.35	86.67	0.97	16.32	40.89	40.8	33.64	19.79	3.39	4.54	4.46	32.96	4.96	1.43	0.05	38.41	0.233842			BTG
TdChr003.2394	39.94	164.2	120.82	68.58	47.16	24.83	51.54	40.08	9.99	32.61	11.8	27.79	20.44	18.5	39.79	19.82	30.7	26.2	16.54	76.39	37.8	0.67	38.37	0.24841			PTH2
TdChr002.3570	85.84	126.55	171.94	162.67	146.4	61.3	117.94	128.05	51.38	146.79	23.59	118.63	58.47	87.16	55.38	24.13	82.85	45.15	48.44	188.23	49.19	9.53	38.37	-0.564739			Rho_GDI
TdChr004.2228	275.64	219.15	90.51	93.79	73.96	57.79	90.42	124.38	48.42	228.58	51.08	118.56	80.83	123.69	111.26	71.28	131.46	68.4	65.43	223.03	98.31	37.3	38.33	-0.910171			Rdx
TdChr003.1936	432.38	360.38	222.48	106.74	75.68	138.23	131.92	155.11	16.91	176.4	15.22	32.05	29.67	66.68	23.42	14.38	37.58	24	13.52	290.14	35.12	7.75	38.3	0.000812612			Ribosomal_L12,Ribosomal_L12_N
TdChr004.782	262.48	145.77	103.43	59.09	66.23	153.09	352.22	229.11	311.02	212.11	71.72	206.16	320.74	886.97	197.61	91.84	269.29	374.59	1220.2	111.08	217.67	2.02	38.19	-0.871509			Transket_pyr,Transketolase_C
TdChr006.345	94.65	38.38	171.29	86.01	80.44	50.28	151.02	250.74	12.6	223.2	16.35	28.83	36.88	91.82	22.82	17.9	20.99	17.64	18.02	128.85	21.37	0	38.16	0.00135446			CPSF_A,MMS1_N
TdChr006.1802	2	67.17	28.85	55.98	21.02	15.53	28.01	24.75	50.34	21.86	67.94	53.48	37.6	45.77	68.14	171.39	62.05	37.21	69.56	28.68	49.11	4.44	38.08	0.00305483			Lactamase_B
TdChr002.394	157.83	170.9	155.04	79.8	85.67	67.35	151.99	181.19	154.39	227.63	85.38	117.17	122.01	122.21	172.19	160.75	136.14	131.07	93.1	231.02	210.86	24.39	38.05	-1.28025			FAD_binding_6,NAD_binding_1
TdChr002.2998	23.26	49.68	46.07	69.15	80.75	27.79	35.58	27.14	27.92	26.59	11.25	22.48	29.4	25.49	99.52	25.89	34.16	46.08	30.87	6.42	16.96	0.61	37.99	0.572796			Pyridoxal_deC
TdChr004.1696	270.96	143.82	153.17	114.17	148.16	40.5	257.01	395.42	100.88	322.69	31.07	148.7	64.33	116.86	53.16	62.03	112.34	88.82	76.69	496.96	79.06	31.12	37.87	-0.846508			DDA1
TdChr001.574	1183.89	276.14	57.61	74.9	124.27	115.22	468.91	727.56	112.21	837.59	65.68	147.17	125.2	338.51	93.84	72.56	216.01	107.77	84.87	982.79	111.16	5.88	37.72	-0.34016			ubiquitin
TdChr002.3160	212.7	225.33	136.28	69.92	40.19	46.75	115.66	176.8	17.58	178.44	20.94	46.18	38.87	82.23	27.96	30.73	44.36	28.92	31.24	228.86	54.87	8.7	37.7	-0.0881317			Band_7,Band_7_C
TdChr006.1855	84.42	38.97	49.48	56.21	42.51	48.34	46.53	62.59	46.97	66.27	50.18	57.59	49.72	48.41	71.09	49.1	46.89	35.31	43.41	34.16	29.45	1.9	37.66	-0.842692			SRP-alpha_N,SRP54,SRP54_N
TdChr003.1910	271.68	305.76	176.14	102.31	73.96	58.48	80.69	94.8	28.2	94.32	28.05	33.42	50.45	49.29	42.05	43.1	36.33	46.94	25.61	134.02	43.48	54.34	37.63	-0.232032			PUA
TdChr004.566	73.06	93.17	47.1	55.33	79.33	47.33	94.19	102.03	79.24	117.89	32.66	113.02	94.15	115.86	65.97	42.02	107.67	86.04	164.56	142.13	114.3	2.04	37.62	-0.81739			PRK
TdChr003.1488	503.83	315.17	124.56	87.84	78.47	56.98	123.05	143.09	44.06	129.79	35.02	89.36	85.35	82.66	71.05	55.09	86.58	72.22	60.46	189.28	130.24	0.27	37.58	-0.695354			DUF1777
TdChr002.2628	5.95	40.38	29.21	192.38	25.2	23.57	24.09	14.15	36.69	10.89	19.41	91.66	31.39	44.9	24.4	18.68	56.16	18.93	36.54	16.46	24.07	3.6	37.55	0.719522			Aldedh
TdChr004.969	113.77	167.14	44.16	60.08	72.1	36.96	97.69	109.69	44.38	105.01	30.75	76.09	59.51	86.55	35.38	40.92	73.9	58.03	91.84	142.42	58.35	4.15	37.49	-0.429814			NF
TdChr002.2895	16.81	14.58	42.57	12.64	13.05	0	25.25	9.83	14.37	9.06	0	0	4.16	0	11.88	18.88	8.1	0	3.5	5.46	0	7.9	37.45	2.22144			Complex1_LYR
TdChr002.1643	191.98	243.54	95.01	74.67	80.64	53.66	80.5	88.33	35.94	111.22	25.29	55.97	45.89	73.53	39.89	33.76	48.06	47.37	49.29	144.28	46.77	7.69	37.45	-0.386377			NMT,NMT_C
TdChr004.825	7.67	9.45	31.28	32.29	18.35	9.33	20.16	32.27	3.91	37.63	3.43	6.37	5.68	12.92	7.63	4.14	5.48	4.06	3.09	16.3	4.09	0	37.41	1.95801			NF
TdChr001.2923	130.44	231.38	139.82	72.74	47.06	86.08	136.1	185.19	39.13	227.59	25.81	52.23	56.97	105.75	57.86	37.91	53.87	59.5	46.12	293.49	88.74	3.92	37.25	-0.255243			RNase_T
TdChr005.1378	57.48	77	80.34	63.91	43.57	34.97	49.46	57.59	36.02	98.11	34.66	68.31	72.73	64.65	95.65	42.4	85.06	67	60.25	75.6	65.21	47.14	37.25	-0.918713			ParA
TdChr003.606	29.34	40.49	19.86	24.92	37.3	29.19	41.64	42.7	42.58	47.34	15.32	53.99	38.19	47.8	36.2	17.56	53.21	39.5	54	60.76	57.96	17.37	37.24	-0.117359			CN_hydrolase,HIT
TdChr001.3521	230.02	101.05	123.23	81.97	92.31	77.8	122.53	171.97	46.4	163.5	26.94	59.1	48.62	85.55	38.15	26.63	36.17	28.4	38.17	124.38	27.88	0.42	37.13	-0.29067			PAM2,UCH
TdChr004.1896	16.63	41.08	12.68	22.44	20.01	13.18	20.83	13.99	17.41	14.59	10.67	20.73	8.04	10.73	29.28	12.39	39.33	8.04	16.27	10.79	9.71	0.63	37.09	2.2332			FGGY_C,FGGY_N
TdChr005.1090	48.71	10.38	25.59	23.43	22.67	6.68	33.17	47.94	6.15	52.5	0.55	1.09	3.69	17.5	28.11	0.19	0.15	0.35	0.13	18.95	0.6	0	36.99	1.0127			GATA
TdChr006.418	52.4	52.71	65.36	53.35	215.18	62.3	79.83	103.66	43.74	41.25	7.89	31.84	6.24	23.76	7.21	3.22	7.7	2.97	6.86	53.87	2.27	0	36.98	0.00214247			Prominin
TdChr006.1047	35.83	14.35	0.52	12.2	5.2	0.05	0	0.02	0.5	0	0.06	0.47	0.09	0.04	0.21	0.15	0.59	0.28	0.2	0	0.2	0	36.96	60.4262			NF
TdChr003.346	33.45	113.86	79.99	99.46	196.62	166.03	73.48	42.6	121.14	24.82	121.59	361.31	126.69	108.35	97.01	146.36	344.46	123.33	134.06	28.71	112.9	0.61	36.9	-1.04784			RRM_1,U1snRNP70_N
TdChr006.2097	41.39	46.42	17.69	23.57	16.33	19.05	24.5	20.71	19.42	25.59	18.07	37.62	27.43	25.59	13.38	26.63	26.11	23.31	22.56	25.03	14.32	0.04	36.87	1.69406			TLD
TdChr002.645	106.91	109.65	98.2	67.65	38.15	32.52	65.88	106.17	6.45	131.62	13.3	12.25	20.27	51.3	15.71	15.13	12.9	11.4	5.75	114.64	16.86	2.47	36.8	0.0626385			Arg_tRNA_synt_N,DALR_1,tRNA-synt_1d
TdChr001.3029	18.22	31.84	64.59	43.01	34.19	64.1	50.73	63.42	20.77	101.69	16.6	59.91	24.97	58.15	24.35	18.83	53.27	20.02	12.87	131.25	40.36	2.07	36.77	0.00258164			YL1_C
TdChr006.684	22.02	23.33	21.11	71.75	169.52	31.91	59.7	45.44	122.14	28.39	52.23	72.32	54.52	57.65	71.31	36.66	47.19	44.01	66.85	27.31	26.44	0.17	36.69	-0.24349			ACOX,Acyl-CoA_dh_1,Acyl-CoA_dh_M,Acyl-CoA_ox_N
TdChr001.2581	1.87	0	12.32	15.13	29.02	7.54	7.59	6.92	17.15	4.39	3.35	20.03	12.68	7.56	3.04	0.76	8.17	10.82	28.78	2.69	2.39	0	36.59	2.6149			Ets,SAM_PNT
TdChr001.3145	62.22	32.68	56.71	54.58	40.15	21.1	43.07	60.41	21.85	48.95	16.39	20.59	13.47	26.71	18.43	15.37	13.65	10.49	12.73	58.18	11.53	0.36	36.54	0.468038			E1-E2_ATPase,Hydrolase
TdChr005.1877	626.05	437.16	185.57	121.52	139.78	105.66	172.51	198.89	75.05	224.67	55.35	107.64	120.33	119.76	108.21	83.38	108.96	123.04	95.21	221.59	166.89	0.53	36.52	-1.06359			TFIID-31kDa
TdChr001.3159	100.19	70.88	149.03	72.12	30.32	43.38	73.25	108.72	31.87	162.5	42.8	70.36	47.33	62.73	65.26	75.77	73.78	32.26	35.37	101.92	45.79	0	36.46	-0.8143			Archease
TdChr005.2045	0.21	0.5	0.72	10.29	14.72	1.23	35.13	7.89	64.65	1.5	20.88	24.51	76.14	25.28	60.09	15.06	24.93	113.21	35.61	1.06	8.76	0	36.44	0.62982			Sulfotransfer_1
TdChr005.1015	200.23	356.42	182.52	122.88	234.9	181.82	158.28	137.29	95.47	170.69	66.85	143.85	81.62	108.34	112.73	103.04	188.84	105.38	99.87	216.94	130.13	47.98	36.4	-1.15857			Ribosomal_S10
TdChr001.693	145.85	47.34	63.12	74.01	40.1	20.7	70.36	90.04	16.71	121.55	14.2	16.03	28.25	45.45	23.47	30.06	20.48	22.11	15.46	140.2	14.92	35.1	36.39	0.0300541			UAA
TdChr003.1318	135.74	165.35	125.25	112.51	122.12	82.92	120.98	123.82	59.27	93.74	38.83	131.37	71.83	85.7	66.71	53.24	123	71.68	72.46	64.6	56.58	25.26	36.39	-0.764594			CDI
TdChr004.1869	136.23	188.16	125.4	112.03	75.88	81.8	61.04	70.55	14.35	78.39	17.91	42.7	26.25	43.72	61.17	32.27	46.65	19.05	15.92	79.08	39.78	22.53	36.38	-0.205144			DJ-1_PfpI
TdChr005.1057	3.62	1.8	21.24	15.87	13.95	8.69	7.02	6.25	18.02	5.32	2.81	3.29	3.39	4.32	37.91	4.54	1.91	2.54	2.67	3.32	15.28	0.19	36.37	2.73725			SSF
TdChr001.168	126.54	105.79	263.54	113.06	41.22	16.44	62.19	90.38	3.13	83.11	5.08	7.17	13.97	32.18	12.58	5.25	4.84	5.48	3.8	124.09	14.02	2.31	36.36	0.245704			NOP5NT,Nop
TdChr005.020	524.47	240.4	221.11	87.28	71.95	58.01	185.81	264.53	33.75	281.64	30.19	51.36	61.99	122.95	46.33	36.5	52.68	55.06	42.86	392.16	66.25	13.66	36.36	-0.160601			Ribosomal_L24e
TdChr003.1128	130.9	70.71	135.41	105.62	118.97	81.75	92.38	82.66	73.55	28.47	14.86	69.47	33.62	47.16	17.12	4.46	13.11	6.58	41.15	80.4	4.24	0.29	36.36	-0.161351			Collagen,WD40
TdChr002.1381	0	1	0.19	0.54	0.04	115.51	289.2	30.57	22.19	3.28	0.94	101.78	27.16	29.43	3.81	0.26	1.52	1.7	1.89	0.54	29.51	0	36.29	1.18843			p450
TdChr006.1149	130.36	89.35	103.81	115.11	136.07	42.28	40.74	30.98	45.37	21.29	19.29	55.66	28.31	28.55	25.55	20.01	44.27	24.56	31.58	35.59	49.62	3.56	36.28	0.00387447			-
TdChr001.3335	29.39	35.49	26.4	18.39	12.78	13.1	29.16	34.41	35.38	49.74	72.27	33.73	30.95	30.18	64.18	87.24	35.06	37.7	21.5	51.19	24.4	3.95	36.24	0.22365			UAA
TdChr004.1682	385.12	357.8	114.14	83.64	59.66	51.19	70.79	89.3	20.11	106.44	21	38.32	35.31	38.93	44.54	25.84	46.08	27.77	19.57	108.16	27.53	42.24	36.09	-0.151735			SUI1
TdChr001.3597	156.86	73	34.88	34.79	34.56	28.21	46.95	55.69	22.28	87.92	32.44	39.56	27.32	46.85	27.48	38.49	39.24	23.33	27.1	79.55	29.03	0.23	36.07	0.0673453			Yip1
TdChr001.3621	489.43	421.56	198.39	56.88	91.17	76.8	65.81	84.76	35.34	121.17	28.5	44.52	43.69	66.73	78.77	39.03	62.52	37.13	31.62	96.04	44.66	133.45	36	-0.56758			Acetyltransf_1
TdChr002.1987	31.93	13.61	35.35	59.85	40.19	16.6	62.21	106.29	64.52	70.19	20.28	44.92	26.34	41.84	17.53	30.25	13.68	10.46	26.38	97.59	5.51	0.51	35.99	0.117448			Acyltransferase
TdChr001.3549	115.84	197.13	143.17	75.82	55.15	34.59	74.26	47.21	39.11	27.12	30.6	131.43	48.59	54.66	37.34	34.88	106.62	83.54	51.53	29.33	77.85	0	35.93	-0.341485			NF
TdChr003.1810	77.89	72.84	60.4	34.67	14.31	27.59	19.36	15.86	4.68	20.1	11.24	14.22	31.87	23.69	19.42	10.63	19.45	17.71	25.78	28.39	36.09	0	35.86	0.867378			F5_F8_type_C,Sad1_UNC
TdChr002.243	31.7	55.79	28.63	53.96	70.11	108.1	117.67	93.18	113.42	77.32	32.71	65.75	131.44	68.32	57.75	34.53	53.61	99.31	110.1	70.7	65.1	2.41	35.81	-0.577903			Cytochrom_B561
TdChr005.1332	343.66	128.68	75.13	75.54	175.69	68.27	142.48	123.82	74.54	124.09	19.08	78.88	57.43	58.53	38.89	12.29	47.62	26.3	31.82	90.35	16.44	0.07	35.51	-0.444233			LIM,Nebulin,SH3_1,SH3_9
TdChr001.3641	81.82	46.28	32.8	37.99	26.04	20.08	48.97	77.86	21.29	98.69	22.48	36.14	30.55	49.56	28.85	30.5	33.8	26.7	24.49	90.99	28.12	3.68	35.5	0.131117			-
TdChr002.3265	2.86	9.7	13.16	43	71.16	53.76	106.87	39.76	167.61	15.89	58.67	117.5	128.82	148.95	102.51	59.35	66.63	86.81	205.84	16.82	87.04	2.07	35.42	-0.302911			GlcNAc_2-epim,Thioredox_DsbH
TdChr001.441	207.96	102.16	121.04	86.06	66.84	54.64	58.64	82.02	14.1	87.45	14.85	19.43	19.21	35.42	20.18	14.12	17.95	13.76	12.8	71.75	12.68	0.29	35.4	0.0016			HGTP_anticodon,WHEP-TRS,tRNA-synt_2b
TdChr002.2201	329.31	423.62	148.7	88.39	89.8	135.83	103	109.72	45.86	191.48	85.36	60.09	104.23	130.35	164.52	100.77	174.36	198.22	126.18	176.21	278.37	0	35.4	-1.05087			Robl_LC7
TdChr005.1636	166.77	233.78	122.41	92.02	106.69	106.47	95.37	103.69	43.18	155.66	37.89	77.04	84.91	82.22	63.95	66.51	92.48	94.68	44.76	119.68	159.02	9.61	35.39	-1.18593			Ribosomal_L10
TdChr001.2787	3.8	21.9	110.88	116.57	107.88	76.16	163.99	185.14	145.28	183.63	58.53	71.1	77.54	99.31	78.14	61.18	48.91	56.44	59.94	159.58	46.88	0.57	35.3	-0.666558			Dynamin_N,EF-hand_4,EHD_N
TdChr006.1018	17.28	23.67	31.05	44.79	98.02	35.49	69.34	63.03	113.37	21.82	34.89	36.31	21.87	19.74	51.01	21.5	16.82	14.47	23.16	17.9	7.7	0.09	35.25	0.535044			bZIP_Maf
TdChr006.730	3.09	31.52	30.63	73.43	125.11	30.26	25.47	26.83	13.78	26.66	4.05	21.53	4.37	14.9	7.5	2.09	6.92	2.3	8.44	49.26	3.96	0.38	35.24	0.776153			EMP70
TdChr002.2575	1.67	46.91	74.82	100.99	47.79	20.79	12.2	3.91	40.22	3.21	3.72	8.97	13.07	5.9	25.83	13.61	34.91	29.59	21.22	7.02	4.99	14.38	35.22	0.72949			Histone,Histone_H2A_C
TdChr006.686	40.81	59.54	33.79	61.22	65.77	59.29	54.21	73.74	170.76	43.03	46.98	662.24	933.46	359.62	180.2	38.68	746.81	1076.95	905.64	25.65	505.28	0	35.2	-0.0663544			Glyco_transf_8
TdChr003.171	65.84	108.49	58.12	55.29	31.78	28.98	143.18	195.1	258.36	277.28	161.87	182.86	120.33	151.99	395.54	267.59	187.39	117	126.78	242.63	145.02	4.22	35.15	-0.834306			6PGD,NAD_binding_2
TdChr006.212	359.04	171.07	86.37	83.33	69.54	67.46	124.87	185.53	28.09	203.87	37.85	82.31	66.98	100.2	55.35	48.14	79.47	59.2	60.99	211.83	72.15	0.25	35.1	-0.667449			NF
TdChr004.353	200.38	60.85	96.95	83.25	143.07	113.44	181.84	180.47	77.33	140.65	65.87	175.03	106.04	110.89	88.34	69.61	122.77	79.47	110.15	85.56	57.16	0.17	35.03	-1.05965			G-patch,RRM_1,zf-RanBP
TdChr003.531	146.75	183.64	104.69	92.16	121.08	98.09	144.07	162.42	95.45	201.28	59	101.58	111.53	127.95	111.8	82.97	118.95	112.41	109.47	204.1	113.75	5.34	35.02	-1.94916			UEV,Vps23_core
TdChr002.2505	275.81	302.93	111.53	59.52	37.35	88.2	105.11	127.18	32.23	155.95	39.39	75.95	120.92	299.14	61.95	62.31	90.12	164.93	282.11	146.85	110.07	0.42	34.97	-0.771663			Pam16
TdChr001.2560	113.5	34.47	72.24	51.29	65.34	31.84	63.59	101.09	17.76	113.28	11.26	28.77	20.77	44.58	18.78	13.17	20.32	12.13	12.47	54.22	14.6	0.16	34.87	0.0730881			TIP120
TdChr001.1577	164.24	143.88	102.75	107.86	126.35	59.21	110.1	129.84	43.08	121.5	30.05	55.71	32.08	57.88	28.05	25.2	28.94	18.97	20.75	161.13	17.28	0.19	34.85	-0.237515			Nic96
TdChr005.146	1.48	147.79	2.48	0	0	0.42	1.15	0.51	1.29	0.77	0	0	0.17	0	3.97	0	0.18	0.16	0	0.11	1.33	0	34.84	24.6525			NF
TdChr002.2218	537.47	330.87	221.07	248.51	102.19	81.9	207.93	301.76	67.26	345.96	63.81	104.21	75.76	162.11	49.75	74.41	89	54.73	43.82	275.96	68.75	3.7	34.81	-0.319388			Homeobox,TRAM_LAG1_CLN8
TdChr005.123	69.37	24.13	19.27	31.07	51.92	33.68	135.53	101.9	156.87	93.57	41.64	169.73	237.15	990.86	81.82	41.76	130.16	179.76	2529.1	41.78	203	0.28	34.76	-0.37508			AAA_2,ClpB_D2-small
TdChr004.835	233.41	166.35	142.93	92.69	99.38	66.71	122.74	175.82	31.86	200.81	35.92	59.32	58.16	99.73	53.02	46.95	71.88	50.92	46.32	178.71	55.69	3.14	34.76	-0.379167			LisH,WD40
TdChr002.2893	278.08	147.84	152.86	159.95	103.79	93.16	110.65	65.53	75.38	40.92	65.12	134.75	41.29	32.25	50.12	75.11	113.61	35.97	39.78	54.62	29.29	3.45	34.76	-0.426683			Calreticulin
TdChr001.133	403.01	298.76	184.25	127.19	144.05	184.38	183.8	224.87	57.42	261.37	70.79	183.07	110.83	184.99	96.87	81.16	169.89	94.16	104.19	364.54	156.57	22.67	34.64	-1.36474			SAP
TdChr005.2064	0	4.03	4.08	8.38	18.04	5.17	8.78	6.42	56.27	1.69	86.85	40.19	46.89	20.78	35.35	160.57	27.93	42.9	24.79	0.74	24.91	0	34.61	0.41901			PEP-utilizers,PPDK_N
TdChr006.191	344.75	171.52	150.74	86.62	79.77	44.87	207.51	343.58	33.35	373.54	26.71	59.6	59.14	149.05	31.29	27.52	45.77	32.49	31.28	483.57	24.57	0.8	34.59	-0.189037			Med26,TFIIS_C,TFIIS_M
TdChr002.3036	200.05	125.12	41.78	45.2	44.38	46.56	114.52	153.53	66.86	163.22	90.93	88.03	75.12	96.18	44.67	99.13	63	56.68	46.66	174.49	39.5	3.88	34.55	-0.5196			CDC50
TdChr005.2048	59.64	32.1	13.36	18.62	63.82	36.52	112.91	67.44	65.99	62.85	27.71	83.67	64.76	105.38	28.22	27.15	63.68	53.12	173.57	57.8	28.65	0.36	34.53	-0.62554			Ank,Ank_2,Ank_3,Ank_4
TdChr003.337	485.3	184.19	174.46	93.41	122.5	59.45	163.22	297.52	32.22	374.53	31.74	74.36	88.59	167.79	47.4	40.99	61.12	80.88	68.91	276.01	40.01	1.19	34.51	-0.364245			Metallophos
TdChr004.1807	410.38	262.68	112.23	103.57	181.74	68.92	144.24	156.05	106.62	131.52	51.57	160.88	98.01	117.56	82.06	72.08	166.7	107.37	134.06	221.38	107.5	48.35	34.48	-1.13308			SMN
TdChr003.802	54.79	109.55	168.94	103.93	94.37	110.7	141.8	145.99	66.73	148.2	39.31	68.95	53.76	87.43	68.93	53.49	58.76	73.11	54.93	294.26	110.63	0.64	34.38	-0.690994			zf-CDGSH
TdChr006.2136	35.83	18.57	43.06	49.64	236.11	42.48	64.51	72.27	78.29	38.97	22.68	78.45	48.76	81.08	45.9	21.65	35.31	38.82	96.91	23.06	42.37	0.3	34.36	-0.2383			DDHD,SAM_1,WWE
TdChr001.3579	64.87	28.71	40.98	57.49	32.77	15.48	52.41	77.52	15.29	88.96	22.22	15.68	15.25	41.68	15.05	18.48	11	8.65	11.65	83.79	5.23	24.31	34.33	0.31749			Cation_efflux
TdChr002.3307	176.49	47.11	38.67	27.49	9.7	13.88	66.7	115.19	4.48	140.07	3.1	7.14	13.3	57.94	3.9	3.74	5	4.92	3.57	117.8	9.23	0.08	34.29	0.440063			F-box-like,LRR_6
TdChr005.1722	89.64	97.36	30.81	39.61	37.1	36.18	81.91	118.14	65.72	149.76	78.47	74.03	129.57	110.68	129.8	99	78.94	125	186.46	111.41	83.81	0	34.22	-0.795531			PAP2_C,SAM_1
TdChr003.652	234.2	223.54	85.13	53.39	39.05	59.98	75.69	83.38	7.3	121.62	13.28	20.16	25.83	43.88	30.02	16.02	20.25	20.72	17.82	143.3	37.64	8.71	34.16	-0.0568736			MRP-L47
TdChr002.2709	102.47	37.26	43.98	31.06	71.71	67.11	94.7	111.91	46.67	132.81	31.16	84.51	124.75	101.56	71.22	48.38	82.24	91.42	103.69	36.37	39.76	0.26	34.12	-0.619558			WH2
TdChr006.502	174	220.06	258.29	176.58	169.25	145.73	282.76	209.64	255.55	195.94	161.67	402.69	588.6	880.04	270.35	247.58	417.33	722.09	1312.48	193.87	527.23	108.25	34.1	-0.908696			Thioredoxin
TdChr001.748	203.52	72.9	81.96	58.05	69.12	114.88	110.29	109.61	68.55	141.23	47.81	91.42	144.52	160.41	83.03	63.89	102.01	127.68	173.56	90.67	146.52	3.96	34.09	-0.870816			Bac_surface_Ag
TdChr001.2426	1214.81	977.23	251.37	176.75	254.51	182.42	253.97	261.33	173.75	252.05	76.55	276.75	262.75	424.9	212.36	138.85	345.92	284.03	752.65	372.98	327.22	0	34.09	-1.40255			ER
TdChr004.1648	39.13	47.56	32.64	34	21.63	20.02	26.35	23.48	26.09	23.38	18.78	38.07	22.77	28.92	21.6	19.31	31.43	24.51	24.34	25.97	25.17	1.47	34.05	0.903875			ABC_membrane,ABC_tran
TdChr003.1843	163.94	206.98	70.26	84.91	124.08	88.92	59.57	47.1	60.05	58.43	66.4	93.68	88.19	80.46	138.56	96.7	129.26	116.68	70.46	38.45	100.51	150.11	34.01	-0.944546			Robl_LC7
TdChr001.566	6.44	22.55	25.12	45.98	63.13	37.1	30.21	21.81	128.3	10.37	130.46	410.78	123.12	145.25	66.1	189.57	416.62	149.08	226.86	6.97	53.5	3.71	33.99	-0.170084			BcrAD_BadFG
TdChr005.871	137.18	185.94	100.67	65.3	63.31	84.46	79.64	80.79	28.85	87.9	22.76	58.81	40.07	47.19	37.55	27.45	52.84	39.51	26.48	146.4	67.56	14.67	33.93	-0.527402			Ribosomal_L35p
TdChr002.2096	0.53	83.44	4.2	4.24	0.66	24.11	25.01	9.01	95.93	0	4.61	262.85	7.14	11.45	6.5	2.82	463.64	5.57	3.36	0	2.51	0	33.9	1.29257			-
TdChr003.1377	38.99	85.8	38.18	51.23	71.97	40.19	73.92	85.66	59.7	72.75	35.11	85.24	55.08	61.54	63.6	55.11	90.37	61.09	49.54	70.79	55.31	31.06	33.89	-0.931691			PAW,PUB,Rad4,Thioredoxin,Transglut_core
TdChr006.1540	497.3	320.78	194.67	118.85	158.27	82.85	171.48	263.22	54.1	276.1	32.92	81.09	65.89	131.59	45.23	39.33	74.58	61.09	64.75	324.54	63.94	1.95	33.87	-0.375219			Iwr1
TdChr003.1881	597.26	216.4	225.6	182.19	497.48	211.79	285.01	384.82	240.05	358.65	167.58	636.08	161.38	226.38	147.87	305.77	1069.21	184.77	193.91	376.76	135.42	1.07	33.87	-0.993313			MGC-24
TdChr002.2037	189.13	46.29	65.44	45.54	85.62	75.68	57.8	61.57	32.83	69.38	35.34	123.38	111.08	102.72	61.58	47.26	98.74	95.1	161.14	24.25	35.6	0.15	33.84	-0.489637			KH_1,SF1-HH,zf-CCHC
TdChr004.330	97.19	44.53	38.55	72	61.75	102.99	303.84	155.25	632.97	118.97	80.17	59.69	82.56	111.67	1148.02	187.86	51.03	88.93	108.59	67.46	157.48	0.11	33.84	-0.718918			Aminotran_1_2,Preseq_ALAS
TdChr002.1955	96.89	166.24	193.98	169.67	80.85	42.01	128.36	168.33	13.21	209.85	18.65	29.84	39.05	84.32	33.32	20.86	30.44	25.43	17.21	269.14	55.84	5.96	33.83	-0.0674655			Rib_5-P_isom_A
TdChr005.1248	65.91	495.89	28.48	14.06	0.44	0	0	0	0	0	0	0.14	0	0	0.41	0	0	0	0	0	0	0	33.8	64.5714			Lipase
TdChr002.3465	143.83	31.46	11.46	8.83	3.14	10.63	140.13	236.09	0.9	215.73	3.01	3.26	13.82	88.32	0.52	1.52	1.67	3.55	2.55	213.81	4.71	0.1	33.71	0.428216			NF
TdChr002.2493	204.34	104.16	62.68	59.88	69.63	62.49	98.74	130.22	46.77	152.19	36.35	73.4	63.12	83.84	66.67	49.77	58.05	49.83	55.35	132.47	41.41	3.16	33.69	-0.694638			UBA_4,UBX
TdChr002.492	552.87	279.86	98.84	79.7	100.46	52.6	99.9	103.15	78.83	101.19	47.42	105.46	87.23	88.44	67.85	79.26	99.52	100.98	75.67	159.95	128.01	57.55	33.67	-2.60072			Mod_r
TdChr004.2269	90.24	133.72	151.2	89.5	61.13	75.08	80.02	94.62	23.93	89.82	25.73	31.67	42.46	49.56	39.69	27.22	39.99	34.89	30.83	108.48	47.1	0	33.62	-0.234264			Ribosomal_L18p
TdChr006.1794	154.47	161.53	43.35	37.48	43.83	42.06	49.42	55.55	52.91	62.26	84.66	96.94	73.32	86.24	77.14	114.95	101.74	90.89	95.9	77.77	129.11	99.81	33.56	-0.932361			RDD
TdChr003.1627	117.52	202.25	64.35	65.93	60.83	44.42	53.6	57.42	35.83	71.7	24.24	59.94	33.39	46.93	46.75	35.41	65.26	40.12	48.59	89.56	50.93	17.73	33.53	-0.642406			Adap_comp_sub,Clat_adaptor_s
TdChr005.1468	635.5	323.14	154.92	102.26	106.06	55.18	97	115.4	93.46	112.25	52.86	115.73	109.54	97.52	105.42	102.53	153	140.65	123.8	107.87	126.16	0	33.53	-2.66858			Skp1_POZ
TdChr006.991	504.48	60.63	132.54	84.12	153.29	75.36	165.3	227.67	42.93	191.01	13.64	54.2	30.57	88.48	8.66	4.29	9.92	3.42	22.65	98.19	2.32	0.07	33.51	-0.198582			KH_1
TdChr002.3017	65.97	97.31	67.72	65.29	100.78	84.98	127.4	110.33	236.95	103.15	54.85	179.37	125.29	110.84	111.99	79.38	141.62	104.25	125.4	78.53	87.34	2.22	33.46	-1.47364			Aminotran_1_2
TdChr002.2988	13.07	5	73.4	57.02	18.29	31.13	65.12	58.67	58.59	30.73	6.35	70.73	33.05	44.19	7.12	3.52	21.04	11.25	51.47	61.51	4.7	0	33.44	0.0494663			Mito_carr
TdChr003.1136	155.97	138.29	46.96	59.39	71.9	50.75	78.59	103.04	30.18	89	25.85	48.38	30.72	49.86	26.22	27.65	35.87	26.24	22.78	147.93	44.59	4.14	33.44	-0.289037			Glyco_transf_92
TdChr006.948	441.14	374.67	208.4	180.26	200.39	95.23	152.92	127.98	140.24	111.67	58.24	130.43	123.67	116.44	128.95	95.28	188.54	134.39	127.02	155.58	218.58	26.72	33.39	-1.37611			G10
TdChr002.612	95.64	65.14	31.54	29.2	5.15	72.79	224.36	79.62	474.68	54.9	11.41	242.84	58	106.64	1207.31	14.26	220.69	86.25	131.2	38.27	247.57	418.61	33.35	-0.247143			OHCU_decarbox
TdChr002.873	126.29	173.13	128.42	93.84	64.08	102.33	150.75	110.26	65.76	122.97	27.44	66.41	60.23	74.84	51.34	42.69	96.95	56.51	56.52	188.89	122.16	22.65	33.27	-0.626909			DUF1690
TdChr004.114	78.04	77.6	51.96	56.38	41.34	54.96	59.89	47.56	65.94	52.8	69.89	94.52	87.25	59.18	86.61	92.97	107.04	106.08	71.56	51.55	95.28	15.39	33.26	-0.94026			GNT-I
TdChr004.1620	178.15	197.51	105.67	91.15	191.39	41.68	76.74	67.43	135.13	39.08	44.73	44.64	21.9	37.35	36.34	11.06	16.1	9.5	31.75	66.03	5.46	0	33.25	-0.145578			Choline_transpo
TdChr006.553	24.66	15.88	18.26	18.34	33.49	13.72	24.3	42.2	15.68	32.84	6.19	13.76	11.16	19.65	6.4	4.04	7.12	7.28	12.12	38.02	5.95	0.34	33.21	1.01438			NF
TdChr002.2216	183.91	302	137.34	71.58	93.38	111.71	88.27	111.02	34.61	129.16	25.49	41.38	55.51	65.91	49.2	43.65	52.71	50.5	35.67	230.67	65.67	27.08	33.21	-0.469326			-
TdChr003.256	374.03	177.9	143.89	112.03	177.1	81.52	121.56	171.05	91.67	129.9	44.11	132.63	78.32	121.73	74.08	85.82	143.6	133.99	133.44	173	158.39	0.5	33.21	-1.42948			TFIID_30kDa
TdChr002.319	224.81	105.38	168.6	82.69	45.93	46.46	188.81	269.04	15.07	263.12	8.4	21.51	30.12	91.93	16.34	10.07	21.12	16.29	17.34	445.8	24.39	1.53	33.2	0.000831601			NOG1,NOGCT
TdChr001.236	501.1	275.49	239.01	164.48	174.49	97.31	280.32	375.64	52.62	301.22	29.32	58.15	88.87	151.5	120.61	74.96	64.94	83.06	104.86	511.83	172.13	0	33.17	-0.466062			SF3b10
TdChr001.1093	139.06	26.99	5.11	12.91	52.22	98.28	114.06	117.99	125.3	132.76	125.43	53.54	252.28	115.31	85.81	46.46	42.94	221.43	101.19	146.87	80.83	0	33.09	-0.805918			GST_C,GST_C_2,GST_C_3,GST_N_3
TdChr003.921	149.88	24.07	10.11	14.73	10.18	12.89	12.16	2.5	12.91	0.23	6.54	27.49	10.32	6.05	21.17	3.4	60.79	9.03	19.79	0.59	12.39	0	33.06	1.47007			AA_permease_2
TdChr005.500	84.32	69.79	27.54	47.16	39.49	20.23	32.78	39.88	25.82	39.33	14.98	28.26	24.05	28.04	23.24	18.73	23.32	22.15	22.19	42.69	24.56	2.81	33.01	0.331646			Uso1_p115_C,Uso1_p115_head
TdChr004.2014	17	7.9	26.86	35.15	93.52	38.24	78.71	90.63	112.65	32.02	19.42	76.29	63.09	37.91	17.49	9.67	22.18	26.06	44.79	26.04	12.59	0.01	33	0.0303499			Fer4_20,GATase_2,GXGXG,Glu_syn_central,Glu_synthase,Pyr_redox_2
TdChr002.3279	39.81	59.52	47.61	51.81	26.7	24.06	65.95	95.11	175.04	91.6	156.37	74.37	134.93	62.14	171.61	272.87	71.46	158.56	58.96	95.22	88.68	13.09	33	-0.585962			Apyrase
TdChr004.1882	5.38	78.11	0.15	0.04	0.12	0	0	0.04	0.09	0	0	0	0	0	0	0	0	0	0.16	0	0.2	0	32.99	140.809			Serpin
TdChr003.217	36.36	23.61	29.43	28.85	35.75	36.99	87.53	34.2	212.32	5.84	10.81	170.95	22.45	30.01	7.15	5.09	42.27	7.79	34.07	10.54	2.51	0.05	32.96	0.134494			AAA,CDC48_2,CDC48_N
TdChr001.3422	282.82	119.68	196.63	959.03	41.57	46.07	221.42	304.91	72.51	325.34	13.63	71.75	48.32	119.31	51.94	18.84	64.21	26.65	21.25	306.99	87.05	0.77	32.96	-0.225125			CBS,IMPDH
TdChr002.3226	26.66	52.65	11.31	36.85	18.19	30.54	15.11	16.1	8.34	15.66	2.14	28.04	5.44	11.42	2.08	2.44	29.09	3.02	4.02	20.52	1.37	0	32.95	0.749687			MFS_1
TdChr005.699	3.2	32.13	8.59	13.66	0.84	24.32	19.22	11.89	96.77	29.46	11.43	80.02	29.83	39.78	86.5	22.02	86.58	32.7	46.44	4.94	32.41	0.97	32.95	0.144729			FGGY_C,FGGY_N
TdChr006.215	383.76	170.55	128.9	74.22	57.77	35.26	95.47	158.66	32.86	200.09	23.34	46.18	54.46	86.44	53.01	41.9	46.47	49.14	54.72	268.77	63.5	1.79	32.95	-0.317532			RNA_pol_Rpb5_C,RNA_pol_Rpb5_N
TdChr003.1600	103.98	182.7	114.51	72.87	60.82	49.21	104.24	155.6	30.38	170.62	21.84	46.91	47.88	86.96	49	34.87	46.95	38.6	28.39	154.93	65.41	0.18	32.9	-0.240237			MMR_HSR1,MMR_HSR1_Xtn,TGS
TdChr006.1773	289.41	275.47	126.05	137.45	114.56	136.53	169.3	129.62	215.3	126.19	163.91	318.68	224.92	196.19	185.02	193.67	322.48	244.7	224.93	122.88	276.91	19.37	32.83	-1.42127			ATP-synt_D
TdChr003.649	105.27	69.36	49.59	56.4	54.1	34.37	46.41	57.59	44.25	64.96	37.51	70.1	71.92	60.74	50.42	48.83	58.93	70.19	57.43	63.52	107.33	10.19	32.82	-1.24796			Sec1
TdChr002.1169	993.05	258.83	60.09	94.69	97.19	64	455.31	785.2	35.15	802.6	38.29	61.02	90.18	308.51	48.44	48.61	68.31	52.84	38.57	882.41	92.06	13.83	32.77	-0.150651			UPF0547
TdChr003.959	3.24	60.68	33.35	136.24	36.96	97	205.3	118.9	688.39	39.46	81.19	1266.11	107.32	421.99	473.25	68.03	733.07	71.33	364.91	11.71	424.78	0.62	32.74	-0.180559			Aldose_epim
TdChr001.3102	10.87	52.4	50.24	81.13	56.37	33.9	40.1	22.78	66.69	13.23	31.12	46.64	27.79	24.37	86.29	45.54	49.02	35.48	27.4	15.24	62.8	7.42	32.73	-0.103779			Amidase
TdChr001.2368	179.28	14.71	2.59	0.27	0.16	0	0.44	0.41	0	0.31	0	0	0.11	0.44	0.18	0	0	0	0	0.64	0	0	32.68	60.4074			LPMO_10
TdChr005.1073	99.4	108.14	58.89	55.09	33.3	46.47	34.11	40.36	18.68	60.54	25.3	37.53	31.15	38.06	32.92	27.72	36.4	33.33	27.23	53.79	42.82	7.7	32.64	-0.199618			ThiF
TdChr004.823	150.69	64.93	79.15	65.43	141.31	118.27	123.23	155.11	84.49	162.99	45.72	221.57	83.63	121.11	57.44	52.67	167.2	69.97	104.4	73.39	56.11	0.36	32.58	-0.715741			Striatin,WD40
TdChr006.1000	188.09	26.11	123.15	77.3	112.31	64.97	640.59	1574.66	31.83	1640.09	54.94	85	165.66	716.44	38.06	39.44	41.22	45.35	35.1	648.53	21.5	0.08	32.55	-0.230208			SHNi-TPR,TPR_12,TPR_8
TdChr004.668	190.8	108.58	21.82	37.84	65.5	13.61	24.17	22.57	55.79	19.9	10.26	18.64	24.75	25	122.03	10.49	19.87	24.78	34.85	18.7	55.56	0.29	32.39	0.281301			ABC_membrane,ABC_tran
TdChr001.3028	196.85	177.36	67.19	56.79	55.62	37.01	39.68	50.73	32.38	69.09	28.86	52.05	43.2	54.36	47.86	41.23	56.99	45.06	31.79	66.51	66.11	3.43	32.39	-0.782665			Yip1
TdChr005.860	197.55	265.45	149.86	143.51	177.44	89.93	190	167.93	133.36	222.49	40.03	138.98	82.18	105.21	62.74	77.37	183.5	100.83	95.11	286.63	106.87	30.65	32.35	-1.06766			CoA_transf_3
TdChr002.756	3.05	58.11	92.12	63.7	21.59	14.34	69.41	57.58	403.79	5.99	89.6	97.42	122.01	50.4	146.12	104.52	31.56	75.18	46.22	9.05	12.66	0.04	32.15	-0.34701			UDPGT
TdChr004.1582	79.16	39.55	68.24	47.2	59.3	57.45	106.52	126.43	51.43	163.57	33.36	93.1	105.9	138.28	55.54	42.77	73.55	88.02	100.35	127.23	77.08	1.39	32.1	-0.767019			CBF
TdChr005.1665	330	111.03	147.82	109.75	70.63	67.77	172.57	241.43	176.72	175.62	66.39	177.73	71.64	93.11	82.47	44.37	138.43	50.52	34.39	115.35	22.53	0.05	32.07	-0.59839			BACK,BTB,Kelch_1
TdChr001.123	0	9.79	5.9	0.29	0	0	0.31	0	0	0	0	0	0	0	0	0.41	0	0	8.78	0	0.65	0	32.04	69.8696			NF
TdChr001.2733	39.05	69.46	61.22	63.22	45.73	24.34	26.12	27.42	8.48	33.79	6.78	11.7	8.27	17.57	12.75	9.19	11.15	10.3	4.64	35.97	15.86	1.55	32.03	0.576976			Q_salvage
TdChr005.099	90.89	39.66	36.2	42.52	49.22	46.42	44.02	52.87	45.05	34.78	19.95	60.43	56.73	50.96	41.61	26.55	50.16	46.77	59	28.02	48.12	0.64	31.89	-0.86091			-
TdChr001.3507	508.62	252.42	138.63	118.11	151.17	99.98	203.41	235.1	89.28	237.74	59.6	109.84	142.83	147.11	83.47	87.44	155.65	132.89	91.26	316.81	96.98	11.53	31.85	-1.12959			Cwf_Cwc_15
TdChr002.264	201.8	204.06	89.75	61.41	62.31	57.27	76.53	83.95	53.34	93.1	46.46	84.94	108.25	161.9	63.6	66.31	96.61	119.32	193.71	115.18	151.3	27.46	31.82	-0.955487			ANAPC4_WD40,WD40
TdChr006.1057	0.12	0.61	0.29	0.6	109.52	1.42	0.09	0.1	0.6	0	0.5	1.99	0.67	0.56	0.54	0.72	2.03	0.36	0.53	0	0.78	0	31.78	48.5581			Acetyltransf_1
TdChr002.1986	161.05	237.3	120.03	70.48	64.11	71.49	68.4	58.28	24.11	63.24	22.01	31.5	31.02	43.66	37.52	27.94	34.01	29.68	27.81	94.58	53.28	17.47	31.77	-0.300842			L51_S25_CI-B8
TdChr005.1820	30.61	39.5	45.92	26.38	13.37	14.44	53.15	71.5	13.92	81.08	9.64	13.86	17.23	32.55	27.39	9.1	17	8.41	8.21	112.52	11.94	0.26	31.75	0.622923			F420_oxidored,P5CR_dimer
TdChr002.2016	519.93	298.52	229.72	131.17	114.31	42.57	145.46	246.5	23.62	216.47	20.98	69.44	46.76	98.41	27.51	24.49	47.15	26.64	30.39	136.41	36.7	0.68	31.67	-0.137217			NAP
TdChr001.787	19.23	30.47	70.75	64.53	109.41	99.37	121.67	138.34	207.92	102.41	73.46	224.86	149.1	112.4	96.33	98.26	115.62	95.94	107.99	36.44	59.48	0.04	31.67	-1.27608			Glyco_transf_41,TPR_1,TPR_11,TPR_2,TPR_8
TdChr003.949	29.35	67.95	111.89	122.73	65.1	0	118.47	138.42	66.71	130.81	19.66	8.7	11.86	59.31	42.32	34.58	11.53	10.04	0	226.4	0	16.68	31.66	-0.0360038			NF
TdChr004.1717	8.52	149.04	996.16	415.63	9254.02	1009.76	242.52	120	710.18	39.24	54.93	902.65	135.62	172.02	591.54	140.91	839.81	208.75	519.32	92.42	1400.84	0.03	31.65	-0.264619			NF
TdChr006.1918	583.18	104.37	50.19	46.67	83.58	36.62	85.08	115.48	63.68	111.09	29.61	69.16	71.11	105.08	56.81	49.45	55.89	63.7	115.98	71.27	33.11	0.43	31.65	-0.683203			zf-RING_2
TdChr003.1314	414.4	331.25	92.74	102.38	104.28	87.28	150.88	153.81	103.75	128.57	50.54	113.24	82.49	113.28	58.83	57.47	115.93	89.5	86.09	161.8	144.86	76.7	31.62	-1.37135			CDC37_C,CDC37_M,CDC37_N
TdChr003.2090	859.49	591.65	331.98	99.09	223.59	151.69	521.97	898.3	358.54	1089.18	173.99	320.87	188.24	350.91	118.26	104.44	251.52	335.31	196.66	604.71	550.12	0	31.61	-0.774595			4F5
TdChr003.197	495.86	525.91	210.26	264.24	498.77	265.45	211.27	159.7	126.54	103.73	126.54	0	47.06	188.95	101.37	89.52	91.46	157.79	157.33	268.76	47.15	0	31.61	-0.852441			RNA_pol_N
TdChr002.519	106.42	111.09	42.59	48.61	60.99	37.14	51.45	61.51	65.44	57.14	33.81	74.68	98.91	89.04	58.2	51.42	64.27	93.07	110.87	61.86	61.49	16.88	31.58	-0.933166			Snf7
TdChr001.2053	612.26	697	65.17	97.35	0	117.03	0	14.66	31.03	39.05	24.02	54.31	321.03	123.2	128.36	44.75	34.72	149.19	297.49	0	231.02	0	31.53	-0.203682			Ras
TdChr003.622	116.61	27.88	17.43	13.79	36.15	15.48	40.46	81.19	26.28	68.35	13.94	12.63	6.91	32.8	5.59	3.07	2.11	0.87	4.01	22.58	0.93	0.04	31.5	0.58725			Glyco_transf_49
TdChr002.1009	99.28	97.32	72.69	143.72	462.08	144.67	174.28	127.64	307.25	68.58	204.42	339.21	303.54	600.85	167.16	206.42	203.77	269.05	1124.29	105	290.01	2.96	31.5	-0.732688			SapA,SapB_1,SapB_2
TdChr002.3231	58.5	203.2	107.98	138.7	98.55	84.61	126.05	111.74	114.15	89.91	114.32	95.58	206.05	126.33	88.96	98.85	51.72	163.27	110.2	93.09	483.26	246.82	31.49	-1.91195			Zip
TdChr001.1014	0	0	0.1	0.3	0.04	1.82	6.22	0.67	37.87	0	4.58	0.36	3.66	0.66	33.65	31.94	18.72	33.04	7.2	0.02	0	0	31.45	2.36992			Ald_Xan_dh_C,Ald_Xan_dh_C2,CO_deh_flav_C,FAD_binding_5,Fer2,Fer2_2
TdChr006.2142	48.84	254.95	99.96	125	126.6	67.72	173.48	71.65	358.27	21.41	61.4	213.05	118.63	165.36	124.24	69.87	182.01	105.04	209.49	26.39	91.85	3.7	31.45	-0.700171			Acyl-CoA_dh_1,Acyl-CoA_dh_M,Acyl-CoA_dh_N
TdChr006.1100	217.46	305.05	154.92	97.95	61.53	72.57	106.18	129.82	38.87	119.3	14.66	30.77	42.39	59.02	27.2	28.16	37.86	43.3	25.79	203.29	62.84	2.73	31.4	-0.336615			Ribosomal_L36
TdChr004.1552	0	43.5	45.53	40.7	3.72	14.04	8.26	11.77	19.08	5.48	16.46	14.39	95.63	343.28	50.38	6.17	39	94.21	311.78	13.63	255.07	10.43	31.31	0.333649			NF
TdChr001.1095	129.23	78.97	123.26	88.09	91.5	61.56	146.67	211.54	45.72	238.35	27.42	94.89	57.45	112.12	39.6	39.26	84.26	47.89	46.41	202.49	30.04	0.74	31.29	-0.633302			Ran_BP1
TdChr005.279	133.33	131.46	60.74	64.24	83.74	36.36	35.65	36.11	35.06	38.14	21.08	51.52	25.62	34.8	21.75	28.16	35.7	16.1	30.61	49.07	10.73	0.56	31.28	-0.181663			UBD,ubiquitin
TdChr001.170	878.53	495.76	194.47	118.3	116.76	102.25	145.12	180.91	60.24	256.38	49.35	125.04	91.25	133.08	96.96	66.11	139.86	87.79	96.65	286.55	132.05	3.81	31.27	-1.18119			Cyclin_N
TdChr005.329	84.19	135.25	116.51	50.8	41.19	50.83	24.69	26.01	10.62	53.38	16.31	34.65	29.99	26.64	31.8	25.73	33.47	29.69	18.8	48.84	42.4	2.57	31.26	-0.0182952			N6-adenineMlase
TdChr002.887	82.73	15.13	19.85	19.39	75.81	47.49	73.27	86.01	68.71	66.69	30.88	61.6	79.16	160.19	38.03	25.79	30.9	44.46	232.76	24.16	27.6	0.06	31.25	-0.273438			Ank,Ank_2,Ank_3,Ank_4
TdChr003.755	75.67	75.84	0	2.11	0	0	0	0	2.05	0	0	0	0	0	0	2.7	0	0	0	0	0	0	31.21	27.8311			NF
TdChr002.2049	14.01	775.87	2258.51	4652.77	2207.87	2233.56	25865.1	12726.3	91725.4	1119.29	4958.34	18674.9	17570.6	8876.3	37739.7	9365.15	21973	19963	13092.3	327.32	17709.2	7.9	31.21	-0.535133			NF
TdChr002.792	67.05	106.67	35.59	35.17	30.87	32.13	42.32	51.51	38.41	78.04	28.81	58.3	43.57	48.62	59.41	43.35	48.38	41.41	29.99	79.12	36.44	10.48	31.19	-0.516507			SNARE_assoc
TdChr001.3308	745.86	217.92	114.85	118.42	240.5	126.85	125.74	89.85	169.9	76.36	104.79	236.59	170.16	137.31	139.25	132.36	222.04	197.72	237.63	81.17	215.52	11.37	31.19	-0.990841			DEAD,Helicase_C
TdChr002.2441	106.74	98.61	56.98	69.22	118.93	151.7	172.45	113.86	228.83	125.49	95.05	648.52	118.77	203.29	96.21	87.97	281.77	73.33	209.38	86.42	44.41	0.12	31.17	-0.917011			MARVEL
TdChr003.1536	0	0	53.57	75.26	51.87	156.25	224.77	216.66	40.86	198.06	37.22	77.76	85.34	111.31	39.01	63.8	91.29	75.34	35.07	450.71	41.39	0	31.16	-0.514182			TSC22
TdChr005.1759	129.49	176.35	75.51	58.18	63.92	51.89	87.28	97.89	75.86	108.97	54.17	93.41	68.93	72.8	92.07	77.56	112.31	84.77	58.36	160.64	153.56	39.59	31.15	-1.09247			CIAPIN1,Methyltransf_11
TdChr002.1378	46.87	55.08	21.09	30	18.78	19.75	19.48	22.03	18.45	26	19.28	26.95	24.43	19.77	23.77	19.74	21.16	26.45	14.64	41.63	26.24	9.56	31.08	1.2726			DFP
TdChr003.1764	35.72	18.25	8.51	26.07	38.76	15.41	32.19	35.09	16.88	48.63	12.96	22.65	15.83	30.67	19.64	8.52	20.36	19.15	20.11	47.83	13.18	2.62	31.05	0.685714			Abhydrolase_1
TdChr005.1066	195.74	56.49	110.51	84.49	123.31	60.74	86.47	87.75	41.52	65.39	28.4	92.31	47.08	58.62	36.38	23.55	41.37	27.38	48.81	55.86	24.59	1.28	31.04	-0.476576			RRM_1,SAP
TdChr006.2094	141.27	137.84	131	81.99	51.57	114.46	112.5	73.18	36.22	98.3	17.19	27.9	33.67	50.95	47.17	18.5	44.43	26.19	27.41	194.6	41.71	7.82	31.03	-0.210955			Glutaredoxin
TdChr002.3233	4.1	9.81	4.75	15.7	17.15	14.76	35.9	22.84	55.86	21.6	11.89	33.26	24.87	69.21	20.44	11.77	26.1	35.35	110.68	13.82	32.16	0.18	30.98	0.475069			C2,Membr_traf_MHD
TdChr001.3341	137.63	187.48	180.1	180.01	81.31	36.83	56.79	98.32	54.15	96.38	65.69	22.19	52.65	47.41	91.72	39.98	19.89	45.29	22.61	110.63	55.69	2.92	30.97	-0.41697			PNP_UDP_1
TdChr005.675	758.25	332.54	291.68	157.32	175.54	158.75	554.16	855.69	138.87	933.82	64.62	169.2	175.66	413.71	92.88	70.24	108.63	112.81	169.96	725.93	110.99	10.03	30.96	-0.52442			Arm,Arm_3,IBB
TdChr004.1936	165.5	131.31	68.75	62.65	87.11	72.66	90.53	89.79	96.59	101.91	67.54	160.38	160.59	151.01	70.87	81.85	140.35	151.28	190	133.78	111.83	8.18	30.93	-0.885766			Mo25
TdChr001.1119	377.64	229.98	154.14	92.47	90.67	53.62	129.63	191.85	39.11	214.41	41.36	68.42	54.98	90.65	61.62	44.85	77.43	60.15	33.99	307.28	72.83	0	30.9	-0.450997			PHF5
TdChr005.1219	4.08	4.29	7.03	6.56	30.58	7.75	4.23	1.95	9.88	0.08	5.14	5.55	8.48	1.87	4.19	0.42	0.92	2.29	3.28	0.11	0.2	0	30.83	4.86182			Homeobox,OAR
TdChr002.045	246.44	70.68	81.47	74.79	94.59	51.96	98.44	130.02	58.61	112.68	37.44	65.49	45.59	57.02	60.28	47.24	58.89	42.37	40.46	96.25	26.27	0.12	30.81	-0.633749			ENTH,UIM
TdChr002.3479	473.74	167.67	200.71	92.98	55.91	33.15	216.72	432.42	12.52	617	16.54	30.32	57.01	222.2	21.03	20.22	31.1	26.65	25.14	631.12	25.15	0.15	30.79	-0.0123047			ASF1_hist_chap
TdChr002.1199	134.74	63.64	20.91	57.31	102.47	31.56	91.09	104.94	182.01	88.28	28.98	150.51	43.1	103.35	59.77	21.1	64.62	17.35	56	119.7	28.14	14.54	30.75	-0.395379			-
TdChr001.1200	343.85	163.28	115.89	67.11	36.88	45.41	195.99	269.69	14.34	255.18	14.46	27.85	35.7	111.64	16.92	16.97	23.01	27.54	21.62	357.87	33.85	11.37	30.72	-0.0415779			Ebp2
TdChr001.135	172.12	128.03	237.94	91.51	72.74	78.83	223.74	362.59	38	396.88	29.52	52.45	72.33	165.29	31.78	25.01	32.1	34.96	33.45	307.68	29.84	0.35	30.71	-0.303365			ABC_tran,ABC_tran_Xtn
TdChr002.3028	66.56	125.03	86.56	71.82	61	55.57	39.07	41.15	21.84	39.7	30.38	18.97	19.96	23.7	23.96	33.11	45.77	34.31	20.72	44.05	29.52	9.47	30.68	-0.131032			DPM3
TdChr003.2404	32.41	30.48	22.07	33.94	17.67	24.39	47.31	26.63	36.2	19.69	12.24	29.44	32.38	24.7	22.38	6.85	14.19	32.12	23.47	18.11	9.77	0	30.61	0.465562			FGGY_C,FGGY_N
TdChr004.332	202.31	148.12	132.5	64.82	63.22	56.6	118.86	166.94	22.17	188.45	26.63	53.99	54.34	95.81	62.2	40.34	56.02	39.57	36.48	268.5	103.03	1.16	30.61	-0.366909			Ribosomal_S8e
TdChr003.236	30.47	31.06	16.83	12.11	21.94	20.04	42.98	49.52	24.96	66.38	11.35	48.14	56.72	84.38	43.08	14.67	53.86	56.03	177.41	34.54	52.91	0.62	30.6	-0.118172			PP2C
TdChr006.2118	405.87	445.41	85.02	73.45	49.58	54.36	61.67	61.61	34.39	69.26	14.44	41.96	31.03	38.27	47	27.19	60.79	27.26	22.04	77.77	40.47	0.65	30.56	-0.469945			Apc13p,zf-AN1
TdChr002.2500	175.81	104.17	35.46	37.41	52.45	47.09	69.61	78.57	49	88.79	28.63	65.76	61.79	64.84	58.45	47.16	64.78	70.46	71	40.64	35.31	0.92	30.53	-0.894246			PI3_PI4_kinase
TdChr002.3411	87.09	234.69	333.09	335.68	173.19	237.38	81.9	98.2	37.87	93.83	49.94	74.22	55.69	70.49	79.82	62.9	74.05	59.83	44.43	113.24	82.31	70.58	30.44	-1.10854			Rhodanese
TdChr006.162	79.88	73.9	84.96	33.93	22.64	41.46	63.34	82.23	15.4	96.92	4.12	12.22	10.68	33.76	8.68	4.27	9.69	6.45	5.75	73.24	2.5	0.15	30.37	0.12873			Mito_carr
TdChr006.1593	371.73	273.78	98.14	89.44	86.83	90.8	101.19	117.57	68.48	120.3	42.25	78.95	71.64	78.17	79.85	62.15	86.64	70.33	61.59	125.45	92.35	2.29	30.37	-1.85013			RrnaAD
TdChr003.2028	313.5	224.41	106.18	70.07	70.57	62.67	99.36	118.26	37.04	130.04	33.55	54.88	60.46	72.22	61.48	62.38	70.44	61.6	44.52	119.61	54.13	1.54	30.32	-0.666805			WD40
TdChr005.1583	204.29	43.13	0.25	0.41	0.2	12.78	150.51	286.8	0	342.18	3.42	2.75	23.4	115.29	0	1.68	1.1	3.11	0	323.19	2.42	0	30.31	0.345657			DUF4074,Homeobox
TdChr003.1908	404.85	137.96	106.23	84.97	71.45	32.4	50.43	58.29	36.69	74.78	33.21	59.47	58.11	66.65	60.44	53.78	62.04	70.8	67.79	78.25	67.43	0.17	30.3	-1.49882			WD40,WD40_alt
TdChr006.774	73.4	103.58	65.11	61.17	52.6	128.32	170.18	58.94	99.59	51.52	43.6	120.08	83.37	507.89	43.12	41.11	100.12	86.39	751.37	43.89	53.3	1.12	30.27	-0.640428			Fer2_4,Molybdopterin,NADH-G_4Fe-4S_3,NADH_dhqG_C
TdChr001.2844	2.39	9.79	15.92	26.45	30.54	18.5	21.08	8.68	40.42	2.05	48.85	51.22	64.13	25.24	59.02	65.99	50.31	74.31	42.56	1.16	74.45	0.15	30.26	0.00263089			FGGY_C,FGGY_N
TdChr006.1654	22.88	128.46	106.39	81.99	169.48	177.51	152.91	101.19	157.79	61.5	85.71	278.05	311.74	301.11	96.76	93.77	223.03	246.17	381.51	66.23	188.28	6.83	30.21	-0.805135			FUN14
TdChr002.086	0	0.65	1.36	9.01	10.64	47.44	6.44	2.2	7.52	1.46	0.82	69.66	3.13	16.25	23.97	1.1	59.41	4.04	26.33	1.01	12.52	0	30.18	1.25606			Ald_Xan_dh_C,Ald_Xan_dh_C2,CO_deh_flav_C,FAD_binding_5,Fer2,Fer2_2
TdChr001.1027	45.81	150.07	23.89	28.12	10.12	82.34	70.47	61.16	169.88	50.82	223.54	243.13	87.36	125.21	149.63	303.7	193.48	107.99	124.77	59.99	341.85	33.43	30.18	-0.510737			C2
TdChr005.2152	134.61	675.1	0	5.32	33.18	0	17.79	9.74	92.24	12.01	43.38	80.66	21.64	0	278.23	83.62	73.42	36.46	136.08	30.5	146.53	0	30.17	-0.0377163			NF
TdChr003.1771	134.39	174.55	87.16	65.51	41.35	71.86	77.86	63.82	20.58	73.07	22.88	43.29	34.48	44.95	45.92	28.17	59.46	31.84	34.8	98.48	44.27	15.01	30.17	-0.372542			KOW,ribosomal_L24
TdChr004.1540	53.5	68.36	24.17	19.63	30.17	7.34	30.4	29.71	127.15	20.79	11.45	92.86	19.85	45.04	111.87	7.56	91.13	13.5	46.6	32.2	61.27	0.36	30.15	0.00211949			MFS_1
TdChr005.525	134.18	138.09	71.28	53.02	47.09	43.64	59.37	64.76	14.97	65.65	7.15	28.28	12	29.77	13.71	6.3	17.99	9.89	11.35	72.71	12.97	0.07	30.09	0.00845411			GST_C_6,Tom37
TdChr004.1310	80.07	140.59	54.62	58.32	112.08	77.67	69.97	69.34	107.53	81.62	144.15	261.78	148.58	110.08	164.83	218.45	333.9	149.75	136.18	91.87	189.61	1.01	30.06	-1.05931			Serinc
TdChr003.695	424.76	237.13	63.81	31.36	30.43	35.26	78.04	124.95	22.13	155.83	17.51	51.1	36.83	95.71	36.01	29.01	52.74	42.73	28.6	202.68	36.26	8.43	30	-0.118569			ubiquitin
TdChr006.1596	65.99	64.22	40.31	45.01	23.54	23.52	35.51	38.39	27.3	45.53	45.55	18.25	43.31	57.47	48.02	72.77	34.6	44.16	63.96	51.88	37	13.12	29.92	-0.747049			Lactamase_B
TdChr004.1547	41.49	23.74	118.37	65.01	50.54	36.15	104.6	150.59	20.79	178.85	16.5	32.28	39.79	72.08	30.35	22.45	32.21	28.15	23.96	165.39	33.71	0.34	29.9	-0.0871097			NLE,WD40
TdChr003.033	342.49	177.86	262.68	106.32	78.39	86.74	153.19	156.87	14.49	216.47	22.03	61.48	100.76	69.48	52.51	41.63	50.78	26.08	43.91	267.34	68.18	0	29.9	-0.351371			LSM
TdChr002.1412	88.16	195.28	129.5	115.81	118.34	143.26	138.74	121.19	94.12	128.22	35.83	247.03	129.75	144.27	97.83	63.14	278.94	151.77	162.52	103.41	252.52	14.15	29.9	-1.88359			Phosducin
TdChr006.605	163.63	170.14	140.25	89.54	54.12	77.74	118.71	155.07	27.07	177.08	23.87	47.98	40.9	79.36	47.46	30.57	47.42	42.99	21.93	228.3	61.76	0.63	29.89	-0.257126			Ribosomal_L32p
TdChr006.1844	65.6	130.74	43.45	48.69	17.34	30	35.25	35.22	35.41	40.54	38.88	44.56	41.49	48.7	54.53	53.82	47.11	51.31	33.35	82.82	62.45	5.65	29.87	-0.773379			ARD
TdChr001.428	61.86	78.63	100.91	68.58	62.11	45.91	67.06	63.22	36.96	65.69	35.98	57.29	53.8	68.6	50.61	36.31	68.65	61.95	76.93	124.82	73.43	18.89	29.86	-1.57097			DUF814
TdChr003.2405	16.36	81.95	134.56	47.19	0	25.99	35.32	50.1	7.55	18.17	11.01	0	16.41	18.73	23.5	20.98	31.83	13.78	13.73	70.04	0	0	29.83	0.525698			CHCH
TdChr006.371	407.9	326.26	138.85	92.18	95.83	54.09	119.82	178.57	27.57	173.75	19.44	36.12	42.06	75.56	34.78	35.31	43.21	31.97	28.03	167.56	42.12	0.92	29.83	-0.138247			JAB,MitMem_reg
TdChr002.104	109.63	99.66	57.64	60.46	66.8	34.61	59.9	60.4	28.9	48.67	18.63	48.64	33.06	54.67	22.76	18.34	37.01	28.19	53.23	65.83	48.85	12.7	29.82	-0.606993			NF
TdChr005.423	309.05	169.64	236.27	90.38	32.62	45.83	246.18	368.8	1.63	357.81	5.43	6.8	32.21	127.64	3.85	4.46	4.62	6.15	2	501	10.18	0.91	29.8	-0.0116649			DKCLD,PUA,TruB_C_2,TruB_N
TdChr003.1636	37.33	1800.67	3504.08	2688.91	175.61	26.4	49.4	32.77	313.06	20.46	600.87	2.62	7.54	17.16	691.19	2.88	0	1.12	2.2	2	9.07	0	29.78	0.0143989			MBF2
TdChr006.1669	76.26	47.01	61.93	67.28	79.04	40.13	78	103.51	65.75	129.34	25.21	21.87	19.28	51.36	18.03	5.17	4.6	7.43	10.81	67.65	7.66	0.38	29.77	-0.193057			Cation_efflux
TdChr004.328	84.7	85.02	67.27	52.65	39.3	25.93	57.83	89	20.63	121.25	12.07	29.41	29.72	54.84	23.16	14.34	28.13	25.39	28.61	93.39	19.5	8.08	29.75	0.00338762			eRF1_1,eRF1_2,eRF1_3
TdChr003.1817	56.07	5.36	40.2	33.35	94.64	63.56	108.97	137.45	72.01	221.24	22.63	100.16	98.57	171.76	42.05	15.06	29.74	31.21	211.38	99.43	17.19	0.11	29.73	-0.374002			DUF4588
TdChr005.810	68.01	56.12	217.53	122.85	105.68	51.55	120.1	116.79	69.01	36.42	22.45	91.22	36.81	55.32	19.41	31.86	91.5	46.3	66.6	146.79	74.19	0	29.73	-0.592348			LSM
TdChr003.183	209.45	175.6	187.24	166.99	159.07	68.09	66.62	66.39	30.3	57.01	21.16	69.82	34.52	37.77	42.83	36.21	66.54	30.25	24.17	77.4	30.97	14.85	29.72	-0.631225			Peptidase_C12
TdChr003.380	390.16	123.18	100.33	81.38	76	45.06	116.11	154.38	76.44	147.52	46.82	77.63	61.57	80.35	49.94	42.43	48.92	44.48	49.22	116.92	36.1	0.49	29.72	-0.740301			CLPTM1
TdChr001.2819	0	0.3	0.45	81.74	0	0	0.09	0.15	0	0	0.25	0.13	0.48	0.19	0	0.19	0.1	0.62	0	0.06	0	0	29.68	79.1467			CLIP,Trypsin
TdChr003.477	31.13	22.5	0.86	15.16	55.5	4.69	12.52	13.01	52.01	6.25	0.36	15.22	3.21	11.75	23.59	0.29	16.95	2.03	15.82	6.16	5.75	0	29.61	1.08283			Sugar_tr
TdChr002.2820	47.31	96.93	52.31	43.06	25.76	35.47	40.62	42.5	76.8	55.15	33.95	73	49.92	45.14	100.27	47.42	77.93	60.83	55.54	66.24	76.33	0.38	29.61	-0.717685			ParA
TdChr002.3335	46.3	65.46	23.69	37.92	24.58	13	19.87	19	11.67	19.77	14.03	20.43	14.98	16.04	24.94	15.08	21.77	16.68	15.75	25.39	25.54	7.63	29.59	0.996954			Glyco_transf_4,Glycos_transf_1
TdChr005.1457	429.57	134.5	132.35	129.15	168.38	77.07	150.8	158.48	131.67	157.78	80.89	206.83	129.58	135.85	75.55	76.86	119.54	94.11	118.54	232.52	103.14	14.13	29.59	-1.49335			RRM_1,zf-CCCH
TdChr002.2918	0.65	4.44	72.79	1087.29	3171.24	509.57	629.59	177.22	1203.06	17.04	1.19	154.72	26.42	83.25	302.89	0	99.31	7.13	92.4	8.27	102.2	0	29.56	-0.230539			NF
TdChr006.1028	132.94	131.21	49.69	38.37	45.97	31.01	67.94	66.14	84.28	64.86	45.08	47.74	42.27	47.83	119.95	55.79	51.73	42.28	26.45	75.43	63.26	3.61	29.55	-0.805952			Ferrochelatase
TdChr001.2917	87.75	129.53	38.87	38.59	53.51	39.09	33.83	24.54	55.17	18.61	37.99	70.84	69.58	48.55	71.77	59.36	89.13	93.84	95.52	29.2	88.48	11.18	29.52	-0.543572			Ist1
TdChr004.2274	99.63	71.5	54.36	30.17	23.41	36.04	74.13	101.62	13.76	123.51	11.22	25.47	29.03	60.72	16.38	14.58	30.78	25.76	29.37	176.62	44.53	1.02	29.49	-0.0138856			DUF2358
TdChr001.2651	33.32	46.57	44.19	38.43	33.01	26.02	22.42	27.1	10.42	33.76	9.1	12.46	14.33	18.03	16.05	14.72	11.08	17.25	11.49	43.75	19.33	0.55	29.46	0.514847			PGM_PMM_I,PGM_PMM_III,PGM_PMM_IV
TdChr001.3008	26.45	37.56	63.14	67.45	35.06	32.73	45.93	52.37	10.89	34.86	9.47	19.2	12.73	17.15	16.58	15.28	17.59	6.02	3.38	85.87	12.7	5.53	29.36	0.433003			PTH2
TdChr006.642	188.13	255.04	88.5	84.61	51.3	85.14	144.72	110.46	239.73	161.11	76.16	60.94	96.68	90.84	432.52	113.34	61.25	95.74	47.98	159.3	167.87	51.42	29.31	-0.724127			PTPLA
TdChr002.2292	162.52	105.38	68.35	73.34	75.43	38.36	61.9	67.19	32.31	56.38	13.4	31.8	23.75	30.44	17.74	13.56	15.76	13.92	14.28	81.43	7.51	0.47	29.29	-0.0456008			Actin
TdChr005.589	331.54	306.11	111.5	118.52	91.86	136.53	147.73	116.22	196.97	141.96	179.71	372.77	210.05	200.12	191.89	246.03	338.41	235.03	291.84	144.49	205.89	8.61	29.29	-1.43672			vATP-synt_AC39
TdChr004.1638	45.31	12.93	72.15	78.09	150.2	62.61	49.11	71.93	46.35	99.12	38.67	49.76	61.53	69.23	71.95	45.79	47.62	51.42	47.58	23.03	25.3	0	29.23	-0.689439			RRM_1
TdChr006.181	236.51	167.87	21.16	10.01	11.14	3.74	9.89	18.91	8.71	23.79	1.78	11.65	13.77	8.64	11.04	6.26	5.46	15.56	7.07	12.66	10.77	0	29.2	1.92616			RNA_POL_M_15KD,TFIIS_C
TdChr003.2164	91.36	85.12	51.56	46.63	44.72	32.78	49.58	59.76	32.92	62.97	24.7	41.85	28.1	38.66	30.29	36.44	69.22	27.9	22.14	96.27	31	37.89	29.17	-0.37388			Glycos_transf_2
TdChr001.2908	439.94	62.84	33.79	42.46	209.21	53.08	106.43	139.24	104.82	172.56	59.59	62.65	128.19	82.62	137.77	95.47	59.86	141.36	79.2	52.64	92.6	0.64	29.15	-0.69542			2OG-FeII_Oxy,DIOX_N
TdChr003.1534	278.82	94.78	3.44	5.72	11.04	19.93	78.11	149.23	11.41	211.43	9.54	5.08	28.61	74.01	11.84	16.46	5.7	15.42	10.59	172.56	36.54	0	29.13	0.193207			NF
TdChr006.382	440.49	289.15	223.13	102.08	66.64	38.33	142.71	222.29	19.01	221.31	13.04	26.41	30.96	63.66	29.31	33.15	26.23	26.51	16	353.35	45.88	32.45	29.08	-0.0592943			Polysacc_synt_4
TdChr005.199	155.01	180.55	90.72	79.52	77.55	53.88	99.78	125.79	50.44	139.3	25.46	88.31	47.2	75.82	48.63	35.86	80.69	42.3	48.5	168.57	50.73	0.44	29.08	-0.981895			P34-Arc
TdChr003.318	2.98	111.91	100.54	106.24	85.4	26.07	31.7	6.41	37.06	2.13	5.59	38.7	5.07	18.77	75.33	2.9	39.53	4.11	40.87	0.25	5.35	4.58	29.05	0.0868217			PhyH
TdChr005.523	352.75	331.02	135.22	70.88	57.77	45.52	103.77	126.98	23.01	138.25	23.86	40.23	43.04	56.21	39.08	28.03	47.15	48.89	28.05	232.86	85.04	44.63	29.04	-0.260485			Sas10_Utp3
TdChr005.1703	65.93	167.5	51.73	42.87	40	29.25	38.71	44.46	34.88	57.34	19.82	68.36	39.7	47.81	56.66	34.86	64.97	37.8	32.86	56.99	45.89	15.45	29.03	-0.622988			DUF938
TdChr005.278	24.57	88.55	18.6	28.37	86.21	51.38	43.36	31.12	103.3	13.31	10.61	38.82	14.94	15.08	15.26	4.26	3.68	4.88	23.86	16.29	3.12	1.75	29.01	0.454781			DUF1084,EGF_2,RINGv
TdChr001.1045	123.02	215.69	46.08	90.11	434.03	230.54	176.2	177.04	159.78	83.07	77.16	268	81.78	80.73	50.77	41.53	54.44	22.32	64.3	111.41	5.04	3.87	28.99	-0.440313			Cyclin_N
TdChr002.183	36.75	24.24	23.97	27.41	44.02	26.91	45.09	59.79	57.25	40.6	28.19	56.52	33.66	42.01	21.91	20.77	17.86	17.2	33.92	25.93	12.99	0.57	28.97	0.0476577			SAM_2,SOAR
TdChr006.1147	237.89	120.85	77.4	73.9	84.67	45.44	60.09	61.72	26.61	73.14	22.21	53.3	34.77	47.88	21.43	25.69	36.57	33.85	44.14	88.72	30.15	3.25	28.95	-0.371908			-
TdChr006.1651	45.74	41.31	24.72	44.62	35.21	28.58	55.72	52.97	49.58	32.31	30.02	34.2	42.95	50.7	20.09	21.27	16.31	24.69	80.44	26.2	17	1.22	28.93	-0.159417			Na_H_Exchanger
TdChr006.863	98.13	113.78	103.27	102.69	143.02	97.51	118.54	98.14	133.25	91.08	83.02	170.05	172.91	127.17	152.96	128.04	197.89	228.67	179.98	85.96	200.99	1	28.9	-1.40378			Snf7
TdChr002.236	428.57	24.23	39.71	31.56	33.92	18.86	118.61	194.97	7.58	265.71	7.08	6.12	22.81	94.53	3.25	2.56	1.83	3.74	1.93	91.71	3.32	0.27	28.89	0.0992293			bZIP_1
TdChr001.3036	79.05	59.86	33.66	45.73	49.72	29.21	78.73	104.14	43.46	126.69	30.28	43.36	48.28	72.71	37.74	36.64	58.08	43.93	40.16	211.42	56.94	3.13	28.87	-0.574071			SAYSvFN
TdChr002.3249	415.63	270.06	189.58	87.53	75.15	43.66	107.64	135.55	16.21	172.79	15.3	35.6	35.85	57.48	25.35	23.44	32.43	22.99	16.28	220.95	38.43	1.15	28.83	-0.0976362			RRM_1
TdChr001.3607	1251.65	427.71	630.53	213.01	195.08	106.3	577.68	892.35	29.34	954.64	31	42	104.76	325.12	29.53	34.81	35.92	40.87	32.49	815.83	45.1	0.21	28.83	-0.161634			Methyltransf_25,PrmA
TdChr006.780	44.18	71.29	45.78	32.86	22.44	36.25	23.02	36.73	22.38	30.95	6.86	34.91	28.14	35.34	17.82	22.83	36.44	28.86	19.48	63.78	59.34	0	28.73	-0.15089			COX16
TdChr006.2011	845.15	874.5	4.95	31.42	625.27	31.9	21.62	28.67	62.37	60.55	157.53	502.51	57.03	54.47	13.29	114.04	220.29	212.2	457.98	50.97	15.42	0.12	28.69	-0.150481			HSP70
TdChr002.3467	187.01	131.37	64.18	48.87	28.17	34.63	221.52	89.99	54.24	72.22	12.77	48.74	37.7	780.26	19.7	13.02	41.39	35.78	911.21	68.06	31.15	0.42	28.68	-0.38916			Hydrolase_6,Hydrolase_like
TdChr006.1603	1078.87	436.33	138.6	94.06	98.19	128.92	337.93	479.24	36.5	418.71	27.56	51.3	60.71	178.1	29.28	35.6	47.45	40.23	28.84	644.34	56.82	8.64	28.64	-0.143967			AHSA1,Aha1_N
TdChr003.1476	159.93	118.92	133.49	103.16	101.64	46.85	137.72	232.44	48.08	236.33	38.96	56.81	52.39	104.34	56.5	64.81	49.08	45.55	31.56	245.06	50.15	1.59	28.57	-0.356925			UCH
TdChr002.2881	6.07	10.59	14.53	23.45	16.96	10.48	0.3	1.24	0.3	0.59	0	1.71	0	0	0	0	0	0	1.27	0.97	0	0	28.56	3.35164			Histone
TdChr002.1256	331.27	302.14	155.99	86.97	57.7	15.22	91.29	158.77	14.7	264.29	17.77	33.25	39.89	120.22	30.81	32.75	43.65	40.07	20.5	285.24	60.8	6.64	28.56	-0.138131			Rep_fac-A_3
TdChr002.2566	189.07	169.66	158.05	82.78	82.61	117.8	118.63	110.86	42.66	161.07	36.99	97.3	57.51	92.14	58.43	51.85	73.46	52.02	49.7	151.98	39.95	8.64	28.55	-0.798934			Methyltransf_16
TdChr006.106	182.57	27.24	78.56	63.99	62.95	51.49	74.96	83.46	25.78	56.13	15.76	44.11	23.23	35.07	12.64	13.87	25.7	13.62	15.59	53.74	11.18	0.36	28.54	0.00227454			ARS2,DUF3546
TdChr003.1557	64.72	49.06	53.05	79.25	105.02	43.94	67.81	74.69	39.44	83.96	31.13	48.24	30.85	68.18	40.06	39.11	44.05	29.44	57.15	82.09	27.49	1.91	28.53	-0.594693			PX,Vps5
TdChr003.2142	899.32	263.93	123.89	106.66	114.12	29.78	71.57	95.86	8.21	104.85	3.4	16.06	12.04	37.26	3.91	3.19	11.29	3.2	4.14	153.86	3.87	0.52	28.47	0.000982029			NF
TdChr002.2453	0	0	1.49	150	129.35	10.16	14.71	5.6	33.43	0.2	0	21.17	0.85	4.81	5.17	0.14	10.63	0.79	10.94	0	1.19	0	28.39	1.85653			GMC_oxred_C,GMC_oxred_N
TdChr002.1197	434.5	335.57	64.96	35.95	30.56	64.29	64.38	81.76	16.14	151.14	36.87	66.7	48.08	90.15	54.55	47.93	66.37	52.72	37.76	108.52	71.84	1.77	28.35	-0.905393			-
TdChr001.1248	184.36	148.09	71.56	68.14	85.21	62.17	74.57	70.78	61.54	76.9	48.26	122.99	71.53	73.45	61.18	68.65	113.36	98.81	89.56	107.79	154.75	43.58	28.32	-1.17741			RRM_1
TdChr005.1088	396.92	183.73	185.11	83.71	50.4	41.23	107.86	177.04	8.94	209.48	8.3	14.63	24.54	78.47	15.22	8.45	18.83	5.99	9.47	152.18	7.75	0.4	28.29	0.000827027			Porin_3
TdChr003.357	127.41	60.91	56.18	51.82	53.72	27.75	54.84	78.46	48.86	97.88	49.4	77.44	60.21	61.92	56.81	53.83	61.92	49.34	48.58	121.98	67.05	1.19	28.29	-1.82649			PAP2
TdChr006.1836	22.74	107.27	36.71	37.25	54.55	44.48	27.18	18.24	31.58	23.21	26.47	48.07	42.2	26.28	54.15	40.65	62.08	47.16	33.86	22.04	60.69	3.49	28.26	-0.391284			Isochorismatase
TdChr006.022	56	131.12	226.04	174.2	182.23	182.89	107.08	95.44	39.52	102.22	36.05	105.37	61.33	88.69	82.19	37.41	135.53	56.9	56.29	150.45	85.25	23.62	28.25	-0.780797			Prefoldin_2
TdChr006.1444	51.91	65.59	70.73	78.57	77.32	69.08	163.75	154.05	102.53	142.57	47	145.45	78.15	105.69	30.33	40.58	59.32	56.97	99.41	167.13	24.73	23.72	28.23	-0.774359			EF-hand_1,EF-hand_5,EF-hand_7
TdChr004.340	66.69	44.1	29.7	29.38	50.57	21.45	40.36	55.46	22.46	75.81	12.65	35.64	26.84	46.32	29.16	23.01	43.53	35.85	50.55	86.36	47.01	4.25	28.22	-0.352693			zf-C3HC4_3
TdChr002.2915	225.42	143.93	78.16	105.18	89.89	74.1	135.77	102.8	149.23	105.88	76.97	150.89	120.11	112.52	100.66	98.97	110.26	94.63	113.73	91.22	85.22	5.97	28.16	-2.52978			HlyIII
TdChr001.3065	234.19	106.33	92.66	98.19	4.56	13.19	64.36	78.58	29.62	91.66	35.72	25.25	81.04	45.89	61.68	31.17	16.24	47.37	12.11	82.95	3.84	0	28.15	-0.287531			Spermine_synt_N,Spermine_synth
TdChr005.1711	394	163.02	153.62	123.53	84.94	61.16	217.26	304.6	8.42	197.95	7.72	25.35	26.91	92.11	6.61	6.66	16.31	9.82	9.89	250.61	12.49	2.44	28.14	0.000673106			RRM_1
TdChr002.331	164.73	114.13	47.73	59.6	72.62	70.83	135.48	135.7	126.67	135.26	76.64	168.92	120.95	117.17	82.07	102.24	156.56	117.17	102.59	164.28	118.29	2.71	28.12	-1.46203			DUF1977,DnaJ
TdChr004.1469	59.92	43.73	38.02	29.85	55.91	62.43	44.89	51.47	20.25	69.09	24.17	45.97	33.67	36.59	40.03	36.03	37.04	28.8	22.01	83.64	80.06	1.56	28.09	-0.401798			TBP
TdChr006.1848	322.18	256.6	124.2	59.04	49.17	53.7	151.72	206.73	14.15	210.05	15	31.72	36.54	83.35	26.45	16.97	33.15	26.07	15.15	324.57	57.65	0.98	28.07	-0.187835			Mak16,Ribosomal_L28e
TdChr002.2914	91.15	25.05	25.97	24.6	18.98	25.89	41.72	50.24	74.72	72.86	21.57	133.72	51.32	48.75	77.05	56.85	95.64	49.48	57.29	68.59	38.29	0.46	28.03	-0.475554			Mito_carr,Ribosomal_L12,Ribosomal_L12_N
TdChr001.1541	39.69	39.57	29.55	9.79	30.6	0	22.07	26.67	0	0	0	0	0	0	0	13.2	0	0	0	29.61	0	0	28.01	1.02442			NF
TdChr005.1679	112.57	181.69	74.26	51.82	36.66	63.42	72.37	57.57	45.46	98.41	25.73	98.41	100.67	86.01	58.12	49.44	104.37	109.35	101.69	85.06	133.94	57.1	28.01	-0.98569			Ribosomal_L27
TdChr006.1597	120.8	46.42	47.77	44.23	25.25	18.76	55.02	75.83	25.69	81.57	27.82	29.08	26.91	39.2	30.4	35.89	31.89	23.3	14.68	101.39	21.81	0.48	28	-0.105869			WD40
TdChr006.554	73.99	116.79	29.6	34.21	40.93	51.6	54.59	51.16	45.67	87.25	36.98	86.23	73.41	96.75	61.99	50.6	77.58	87.66	75.06	66.08	119.53	8.45	27.99	-0.875856			PRA1
TdChr006.2063	61.12	164.97	128.84	49.24	21.38	36.57	60.59	65.16	32.54	81.26	40.06	70.32	50.8	55.15	61.62	35.42	59.57	48.82	34.62	127.04	97.55	2.96	27.98	-0.850055			DHFR_1
TdChr001.2912	91.61	82.44	83.98	82.13	111.42	75.43	83.38	117.02	50.49	141.51	20.36	73.9	43.64	73.06	52.91	30.91	60.7	31.62	41.47	147.56	26.26	1.6	27.98	-0.95226			F_actin_cap_B
TdChr002.359	96.78	49.54	77.62	45.94	69.11	32.7	103.45	173.34	15.52	176.18	9.08	30	26.13	50.95	12.93	13.21	27.57	18.52	13.71	339.7	16.37	0	27.96	-0.0337274			Med31
TdChr001.2398	2047.2	4731.28	2582.86	699.41	169.6	256.97	487.24	494.07	244.97	564.94	414.07	398.91	352.36	269.39	189.87	370.91	904.63	510.01	370.48	661.83	6432.5	2.65	27.94	-0.924534			E1_DerP2_DerF2
TdChr001.2167	123.69	166.62	89.69	75.93	60.79	42.22	56.69	63.42	18.61	58.38	27.34	35.37	36.13	38.72	38.41	30.51	38.09	28.69	23.83	89.36	67.72	17.54	27.92	-0.296645			WD40
TdChr005.2071	652.83	476.23	171.16	100.15	68.01	79.68	132.91	164.88	40.83	181.54	36.2	65.49	76.11	97.81	82.16	52.42	92.74	82.65	80.55	181.93	110.49	1	27.92	-0.664235			Acetyltransf_1
TdChr001.247	89.81	57.2	58.91	48.02	150.93	60.76	86.96	93.4	72.06	114.56	41.82	96.52	53.3	33.11	47.85	56.07	101.47	63.45	45.39	106.35	86.61	5.19	27.91	-0.748229			PEN-2
TdChr001.1101	92.62	56.95	69.65	67.27	126.65	107.01	136.03	156.88	34.95	181.51	17.45	67.99	55.63	94.12	41.78	23.54	48.4	29.21	28.26	192.45	27.02	0	27.88	-0.402753			YAF2_RYBP,zf-RanBP
TdChr002.356	42.39	75.25	48	38.22	28.35	37.91	65.1	39.22	57.61	38.35	21.41	51.54	79.64	162.17	30.88	28.96	64.2	75.73	169.26	43.95	102.2	0.93	27.88	-0.445095			LIAS_N,Radical_SAM
TdChr005.872	217.7	137.36	80.78	74.72	54.53	85.65	99.46	85.53	41.07	80.23	20.98	66.43	36.89	56.58	30.11	17.43	40.58	22.06	32.39	75.09	32.01	1.71	27.88	-0.535876			Mitofilin
TdChr004.2297	193.43	62.17	48.03	35.94	35.16	36.25	46.87	58.29	21.4	46.51	6.78	31	16.25	31.39	11.5	3.94	9.19	6.33	18.12	34.7	1.85	0.04	27.85	-0.0979605			Pkinase,Pkinase_C
TdChr006.1566	113.49	73	28.14	39.96	81.82	50.68	51.18	45.41	56.87	40.73	35.6	34.42	18.47	25.03	17.59	11.72	9.15	9.41	16.12	30.1	6.13	0.33	27.77	-0.0712688			Solute_trans_a
TdChr003.2234	117.79	70.15	41.18	45.15	47.09	42.63	67.96	85.19	25.77	84.62	20.16	33.54	33.97	53.75	23.31	22.32	28.18	31.36	36.21	113.51	26.75	3.19	27.72	-0.248814			DUF719
TdChr002.329	598.2	202.92	124.54	99.6	185.28	179.85	211.54	192.36	148.59	217.54	83.07	317.6	118.74	156.13	90.12	94.86	244.62	86.79	139.25	261.04	52.36	6.32	27.7	-1.05181			Mlf1IP
TdChr005.1983	0.25	6.25	46.5	8.24	20.12	10.87	114.73	154.27	1076.53	1.09	11.81	64.31	5.86	21.91	28.94	0.82	7.61	1.56	17.77	1.26	0.53	0	27.69	0.626551			AA_kinase,Aldedh
TdChr004.135	211.98	242.62	95.83	68.46	53.5	136.66	169.19	78.71	77.83	81.45	39.15	65.27	72.54	92.67	74.47	47.78	84.76	88.76	106.02	126.72	140.75	24.02	27.69	-1.08175			ESSS
TdChr006.857	121.1	194.23	85.32	97.92	80.59	91.44	103.04	74.83	138.49	89.08	138.62	318.26	168.58	146.24	121.19	174.84	341.32	186.32	210.06	90.57	158.57	5.43	27.68	-1.13935			Renin_r
TdChr006.850	24.51	29.08	19.12	18.45	33.28	18.01	21.23	17.38	19.2	16.15	10.99	29.94	17.63	15.56	19.32	13.04	19.86	17.12	25.61	20.67	15.61	0.09	27.67	1.36543			Pkinase
TdChr002.3547	1.91	65.4	21.27	7.84	0	11.03	5.31	4.24	35.55	0.63	0.19	21.86	0.64	13.71	48.47	0.08	18.98	0.87	18.1	0.64	0.41	0	27.67	1.1465			AMP-binding,AMP-binding_C
TdChr004.1331	102.23	25.3	46.44	54.19	57.43	25.11	46.16	57.78	25.32	19.49	7.67	17.27	15.49	14.84	10.76	6.25	9.21	8.77	11.15	25.05	4.23	0.31	27.67	0.306326			Sec16_C,WD40
TdChr004.119	151.83	111.28	89.35	66.99	86.7	45.22	92.53	164.9	33.72	187.95	17.87	53.55	43.52	83.88	30.29	17.89	26.91	27.42	35.66	124.81	32.23	0.77	27.58	-0.282425			LEM,MSC
TdChr002.2448	88.21	59.51	44.14	50.21	21.54	15.82	34.12	42.04	33.69	38.48	17.13	18.53	14.59	23.83	14.69	5.59	14.09	7.34	15.07	31.24	3.53	0.25	27.57	0.28171			Band_7,Flot
TdChr006.1661	123.11	85.62	41.51	55.42	75	38.37	58.55	64.68	95.23	68.47	74.47	197.97	100.9	87.83	170.14	127.38	281.18	124.99	109.28	72.73	185.11	24.4	27.56	-0.926841			C2,CUE
TdChr003.467	667.75	319.14	116.32	75.07	122.54	71.28	296.05	472.32	41.42	792.61	36.25	46.86	92.92	266.88	59.6	74.6	51.27	57.62	47.38	625.45	53.91	22.24	27.55	-0.202162			CAF1
TdChr001.2815	0	12.41	0.21	0	0	0	0	0	0	0	0	0	0	0	0	0	0	0	0.11	0	0	0	27.51	276.1			CLIP,Trypsin
TdChr002.2712	118.53	17.65	126.53	63.06	219.08	91.86	186.66	341.08	53.68	209.26	33.41	97.44	67.84	108.26	38.39	30.43	46.89	40.14	40	72.46	39.13	0.13	27.48	-0.474744			CHDCT2,CHDNT,Chromo,DUF1086,DUF1087,Helicase_C,PHD,SNF2_N
TdChr002.643	243.58	389.78	175.75	100.92	124.23	90.25	113.25	106.93	51.01	113.02	27.35	74.63	59.51	59.15	54.18	41.98	96.41	58.72	46.99	168.26	67.82	54.92	27.47	-0.801908			Ribosomal_L20
TdChr006.232	0.82	5	0.35	0.52	3.39	0.67	0.67	0.37	2.87	0.08	2.07	2.25	3.62	2.38	2.38	0.8	0.95	2.79	2.48	0.06	0.42	0	27.36	11.7042			7tm_1
TdChr001.3444	283.6	227.8	97.22	74.74	76.48	85.88	154.73	174.46	67.49	176.65	46.22	113.47	68.47	94.55	62.79	59.95	117.2	84.17	79.9	228.24	101.22	6.5	27.3	-0.858926			DEAD,Helicase_C
TdChr002.2715	246.42	332.46	104	66.85	62.39	79.74	78.48	102.04	30.01	102.09	22.71	43.88	37.61	57.59	42.05	30.36	48.58	36.77	34.36	148.4	67.49	0.42	27.29	-0.54488			Ribosomal_L16
TdChr005.2160	0	1.14	8.89	42.56	16.09	7.48	168.13	85.28	368.49	26.68	828.48	199.97	802.14	454.19	412	785.93	215.97	1068.37	601.86	24.38	1842.95	0.82	27.25	-0.277186			NF
TdChr004.1419	87.96	100.07	122.03	66.15	54.72	90.82	101.57	97.91	43.41	117.64	40.32	66.69	63.33	122.17	45.98	50.92	71.03	56.61	125.71	171.79	55.21	7.15	27.25	-0.817879			Ribosomal_S18
TdChr006.1198	268.92	370.25	347.62	250.13	236.21	350.79	236.21	207.24	134.59	200.49	142.3	425.87	164.41	147.69	187.7	169.97	366.84	319.16	193.22	263.46	301.63	322.89	27.24	-1.46792			4F5,zf-met
TdChr001.2216	216.59	127.93	42.12	34.74	35.78	42.11	60.42	73.47	18.44	129.6	22.17	51.17	38.13	65.75	41.63	29.59	53.85	31.91	38.55	88.16	30.45	14.53	27.22	-0.447118			Pkinase
TdChr002.1957	152.63	207.5	124.56	71.25	81.67	89.33	118.13	137	32.7	169.35	39.01	64.34	70.79	94.05	72.89	69.74	70.29	69.99	55.06	144.81	86.48	2.87	27.2	-0.837974			MTS,PrmA
TdChr002.2738	157.23	213	103.8	102.66	100.18	81.73	121.32	145.25	80.66	176.11	52.25	114.63	93.8	125.77	101.17	92.88	127.84	109.13	97.37	251.07	168.93	28.84	27.16	-1.76746			Clat_adaptor_s
TdChr001.222	0.39	17.95	48.49	157.99	17.11	25.55	84.94	35.56	69.66	10.64	2.43	11.16	8.4	10.35	74.38	6.71	15.14	13.15	13.97	1.1	42.59	5.87	27.14	0.40604			adh_short
TdChr005.772	198.47	262.64	90.48	126.37	102.85	105.91	170.48	107.06	244.12	83.72	155.75	264.05	233.64	193.76	157.42	188.55	238.23	226.52	308.58	102.07	223.48	6.5	27.14	-1.13863			V-ATPase_H_C,V-ATPase_H_N
TdChr006.1330	131.15	105.35	65.07	49.86	68.75	52.16	76.27	101.85	26.65	120.93	25.49	34.89	43.72	69.84	36.52	35.3	48.77	40.67	40.83	175.44	48.8	38.14	27.1	-0.602931			RsfS
TdChr003.1865	141	24.62	41.23	37.84	71.04	36.45	73.56	94.17	79.08	80.54	25.33	49.81	30.01	51.26	37.02	16.03	14.49	14.24	30.73	35.43	8.98	0.04	27.07	-0.255824			RINGv
TdChr002.3683	40.62	26.62	101.63	94.22	154.11	135.28	172.63	182.44	97.98	226.25	68.1	130.6	136.25	133.66	103.21	113.65	103.97	108.14	102.23	178.56	111.38	0.17	27.07	-2.03621			Ras
TdChr002.772	423.93	84.89	91.37	56.74	64.02	79.38	371.69	601.75	18.43	396.15	14.97	17.63	30.24	147.18	9.82	4.11	4.28	3.89	4.32	492.69	4.39	0.81	27.05	-0.0275229			KH_1,RII_binding_1,TUDOR
TdChr001.2424	116.06	112.27	111.72	95.18	90.83	77.85	120.01	96.27	79.43	65.64	27.81	40.4	45.8	43.49	56.25	34.39	48.2	48.47	35.5	167.15	135.44	16.44	27.05	-0.619308			NF
TdChr001.588	26.07	12.17	3.21	6.73	4.95	5.3	20.4	23.2	16.43	31.45	36.64	5.95	13.5	14.26	16.9	53.49	4.85	15.3	4.7	34.33	17.36	5.36	27.01	0.618973			MFS_1
TdChr005.2114	40.58	134.14	45.8	39.01	20.34	23.49	64.28	51.25	209.32	41.48	58.33	242.46	108.25	152.78	168.82	68.72	202.37	99.89	164.61	25.63	106.29	5.35	27.01	-0.358213			HAD_2
TdChr001.3523	89.24	55.54	53.83	55.48	33.27	55.35	103.6	141.76	43.07	165.32	17.65	47.75	45.63	216.33	42.41	40.18	56.52	82.82	261.6	175.56	108.94	0	26.93	-0.447116			Fer2
TdChr004.1343	18.38	27.98	92.55	102.05	111.44	82.26	72.03	73.7	10.72	96.56	15.16	17.48	24.79	33.14	44.15	37.56	39.59	19.16	21.22	77.35	25.59	0	26.9	-0.11076			Ocnus
TdChr004.1955	165.84	178.59	118.47	71.25	70.14	71.16	105.3	95.83	39.97	113.06	24.07	54.51	42.94	60.62	42.3	24.05	58.39	34.5	40.87	143.56	58.66	0.78	26.89	-0.525687			MRP-L27
TdChr001.116	143.97	108.05	80.15	66.91	59.3	53.96	161.17	171.83	113.1	165.47	39.68	149.01	117.16	117.08	49.45	60.38	153.27	99.47	100.54	173.93	99.79	4.55	26.89	-0.847839			Fes1
TdChr006.2087	3.44	3.4	0	0.56	2.14	2.06	8.25	3.42	29.72	0.43	29.19	29.42	96.22	24.65	9.69	50.42	41.79	98.49	38.95	0.16	37.78	0	26.87	0.544252			NF
TdChr003.1017	167.51	161.12	77.79	44.37	42.74	48.34	87.9	116.73	27.46	124.8	25.87	55.74	82.76	115.75	32.01	32.59	46.22	76.84	84.26	178.72	87.97	20.57	26.84	-0.77611			tRNA_anti-codon
TdChr003.698	169.99	154.69	78.11	60.65	139.28	79.01	83.11	93.64	103.69	74.92	65.42	127.73	112.76	111.04	52.26	96.45	136.21	113.6	112.73	124.17	218.3	0	26.79	-1.55042			DUF1754
TdChr006.103	83.42	90.18	70.5	74.29	67.48	33.24	85.97	126.1	25.49	130.07	14.02	19.66	21.31	47.26	17.74	18.12	16.4	20.99	20.53	224.47	15.36	3.92	26.71	0.00166486			ARPC4
TdChr006.269	278.57	96.37	66.58	52.7	82.59	53.77	180.72	270.56	71.18	232.25	26.6	86.95	118.66	179.99	43.96	26.59	70.53	103.03	219.74	197.91	74.03	0.25	26.63	-0.439082			Cullin_binding
TdChr005.1484	1.67	27.08	36.36	43.69	67.45	67.32	17.24	1.62	4.68	0.72	3.08	6.52	1.31	2.82	4.37	2.92	5.92	1.83	1.55	0.25	1.05	0.08	26.6	1.15586			Abhydrolase_1
TdChr003.117	11.74	3.64	3.12	5.12	8.88	4	2.59	2.3	9.93	0.86	9.56	23.13	18.45	11.82	28.87	8.22	25.72	17.77	18.72	0.25	22.69	0.11	26.56	1.11728			Amidase_2
TdChr002.444	321.34	118.98	139.08	86.66	143.96	73.85	153.35	187.4	52.15	103.97	13.74	48.12	37.63	64.01	19.84	12.28	20.57	14.01	35.4	77.86	16.71	0.21	26.54	-0.279194			RRM_1
TdChr001.1042	50.65	72.68	76.81	62.43	92.54	97.04	71.39	62.55	58.2	87.28	48.45	92.36	60.62	80.63	85.37	85.36	108.87	81.89	67.42	77.98	133.69	3.8	26.54	-2.01486			TRAPP
TdChr006.1446	256.05	32.08	81.38	50	67.92	44.3	147.21	307.91	26.74	293.93	17.7	33.53	50.19	157.56	24.71	18.31	31.91	29.45	124.67	147.85	27.62	0.45	26.51	-0.162502			PPP4R2
TdChr006.483	544.92	776.81	745.01	354.22	727.33	327	375.27	294.15	157.1	346.98	196.83	441.09	396.22	312.1	252.72	349.74	504.42	373.63	326.11	126.86	491.6	0.39	26.5	-1.67421			Histone
TdChr006.457	52.66	25.06	49.3	45.22	48.15	37.23	74.1	98.29	58.14	94.07	30.19	78.89	59.98	64.09	44.11	26.25	60.77	37.27	54.51	60.4	24.45	0	26.47	-0.842632			Vps26
TdChr003.1579	23.77	35.29	16.29	45.42	36.21	31.98	49.07	65.57	36.43	66.86	49.82	24.49	33.31	33.81	38.52	25.45	22.37	32.6	25.26	62.67	23.56	0.56	26.46	-0.392556			PX
TdChr001.2309	0.75	8.76	0.77	0.79	1.33	1.6	0.29	0.18	2.56	0	2.61	11.51	3.29	2.75	3.83	3.97	8.03	3.18	5.78	0.07	3.64	0.07	26.43	7.38272			Trypsin
TdChr002.2386	0	0.97	1.52	266.14	38.78	91.56	143.59	56.76	403.14	7.39	64.8	374.82	96.89	116.43	255.04	19.68	272.05	86.58	187.15	2.98	152.19	0	26.42	-0.384421			adh_short
TdChr001.2980	207.34	111.41	172.65	124.31	125.44	98.17	233.78	332.83	104.45	274.34	48.59	110.14	116.2	155.1	67.8	61.24	116.05	110.3	131.71	352.16	158.05	0.4	26.39	-1.39866			LSM
TdChr003.626	127.54	54.18	54.08	37.9	46.7	13.4	24.83	53.51	14.75	76.29	12.35	17.58	22.13	32.14	16.72	15.44	19.62	20.52	16.37	62.15	21.75	0.98	26.38	0.129234			Hist_deacetyl
TdChr005.1814	149.44	122.48	106.56	34.77	36.37	14.2	54.56	92.41	9.43	132.4	9.65	25.23	19.35	43.75	20.56	7.73	29.47	18.08	16.54	186.88	44.92	0	26.38	-0.0531319			RNA_pol_L_2
TdChr002.323	285.42	202.09	113.46	95.85	167.88	80.74	153.24	177.49	94.92	163.72	52.48	117.56	82.46	89	77.76	76.54	174.34	96.25	93.8	221.89	119.47	0.34	26.37	-0.827758			DIM1
TdChr006.668	225.29	172.69	156.03	100.61	110.16	26.14	65.51	75.56	22.52	70.16	23.34	53.67	65.83	52.85	43.61	23.27	48.31	45.87	34.99	110.36	63.19	0.27	26.34	-0.473401			SAP18
TdChr003.2067	141.1	117.55	60.63	50.22	38.3	63.23	80.95	87.87	28.68	96	14.04	30.28	31.78	52.89	40.26	29.31	37.51	39.97	36.07	189.27	58.58	1.12	26.29	-0.336978			DUF1168
TdChr006.006	1252.86	1201.81	2914.84	2174.66	2224.66	192.83	459.75	779.79	91.28	1094.97	115.72	476.54	240.76	482.44	158.56	166.02	402.12	177.19	294.48	804.86	274.6	24.78	26.29	-0.482689			AT_hook
TdChr001.670	26.68	67.29	24.9	31.47	44.82	32.17	26.49	28.08	28.2	37.72	29.17	33.54	21.86	28.69	36.56	43.02	41.05	38.42	27.06	43.86	70.11	7.4	26.28	-0.392595			PRA1
TdChr002.1046	14.97	307.56	28.73	35.07	19.78	60.18	12.36	1.74	7.9	1.11	3.14	3.71	6.55	4.72	7.98	1.67	1.98	1.92	2.89	1.91	0.48	0	26.27	1.39139			Aa_trans
TdChr006.673	20.67	21.4	13.31	8.44	15.51	9.98	20.35	34.01	8.26	53.6	14.12	13.07	14.91	24.83	8.98	13.92	12.48	10.62	8.47	63.84	9.68	1.26	26.24	1.09863			UAA
TdChr006.1344	260.61	42.25	142.53	101.6	184.76	96.96	224.17	369.08	55.68	233.08	23.65	63.16	41.24	104.98	21.76	15.32	24.82	17.12	25.1	163.02	10.61	0.98	26.2	-0.228389			Topo_C_assoc,Topoisom_I,Topoisom_I_N
TdChr004.1509	425.29	184.49	110.15	56.57	36.85	55.98	154.52	229.94	7.91	262.01	28.98	15.54	33.95	115.39	20.48	14.45	19.18	13.97	8.62	465.57	29.96	1.37	26.19	-0.0650835			Ribosomal_L30,Ribosomal_L30_N
TdChr001.1067	0.1	3.21	7.07	2.91	5.66	4.12	4.97	2.75	19.01	0.07	18.05	37.45	16.72	5.66	0.12	4.81	1.97	1.96	4.78	0.23	0	0	26.18	4.12663			FR47
TdChr004.766	718.35	302.17	261.01	149.74	148.03	62.24	161.63	263.24	20.8	322.16	22.54	34.99	56.63	121.37	31	34.17	27.65	39.41	27.45	261.24	33.22	1.2	26.17	-0.166726			CAF1C_H4-bd,WD40
TdChr003.712	100.2	81.93	75.36	59.69	83.2	42.23	39.18	53.1	12.91	54.27	12.1	14.72	18.5	25.79	15.1	14.78	13.98	13.86	13.47	48.45	15.08	0.06	26.13	0.0111576			-
TdChr002.581	118.43	211.53	145.58	66.12	48.27	37.85	79.27	109.3	18.76	142.97	17.69	44.27	48.32	73.13	35.19	25.71	49.84	40.97	32.24	157.43	66.18	1.65	26.12	-0.364266			WD40
TdChr003.1550	73.75	24.76	41.09	29.25	72.68	40.83	32.04	45.51	34.53	54.64	27	66.62	40.89	44.25	31.35	25.4	44.02	28.55	48.11	21.25	19.65	0.03	26.08	-0.45282			HLH,PAS,PAS_11,PAS_3
TdChr004.347	53.68	53.48	35.52	50.2	25.16	27.91	59.15	43.59	71.62	44.27	42.96	81.07	72.01	89.36	44.25	46.41	70.48	67.26	92.79	41.12	61.64	3.09	26.06	-0.892685			FGGY_C,FGGY_N
TdChr003.2194	57.28	21.13	57.17	37.74	76.51	80.88	129.46	202.17	27.53	219.87	17.34	15.18	46	92.56	74.11	15.03	12.93	20.06	15.79	71.85	10.97	0	26.03	-0.197298			PTB,SH3_1
TdChr003.1638	124.68	35.78	73.44	45.44	114.06	57.46	101.9	115.72	51.14	62.83	14.31	51.22	18.61	33.27	13.61	5.22	7.84	5.8	18.44	38.75	3.15	0.09	26.02	-0.208707			zf-C2H2
TdChr001.540	157.08	82.13	48.89	44.97	42.98	41.9	109.52	176.64	39.57	176.31	50.44	34.84	42.29	82.69	42.32	116.62	41.25	33.59	35.51	184.49	27.7	1.6	26.02	-0.287395			Glyco_transf_43
TdChr005.1071	0.93	2.29	28.68	26.12	43.85	26.03	34.41	31.11	82.92	7.61	4.72	36.24	10.88	13.65	12.33	0.97	4.51	1.28	12.23	20.01	0.32	0.03	25.99	0.570954			DUF1899,WD40,WD40_4
TdChr003.2250	12.76	55.07	3.73	30.99	36.65	32.12	73.83	9.93	48.08	0.56	0.9	21.51	17.88	16.44	9.06	0.62	12	8.24	28.97	0.69	9.55	0.09	25.98	0.552812			GTP_cyclohydroI
TdChr001.1291	95.64	70.15	28.74	43.18	42.75	40.96	46.33	41.74	34.63	50.31	32.18	45.58	33.05	32.23	39.4	37.47	43.7	29.31	26.09	53.65	33.8	17.73	25.97	-1.06342			Dus,dsrm
TdChr004.1240	2.28	21.36	69.64	80.7	100.98	55.11	33.6	16.85	45.03	4.04	19.35	57.06	40.11	31.37	27.18	19.62	37.28	36.46	50.16	10.84	44.51	1.36	25.96	-0.267281			Cyclin_N
TdChr004.1266	167.63	171.99	64.32	51.23	51.79	57.21	72.6	92.09	30.06	106.91	16.98	54.23	32.27	57.78	30.66	17.45	47.32	32.89	41.32	136.87	44.9	8.37	25.96	-0.678528			zf-C3Hc3H
TdChr001.414	189.67	162.82	60.13	68.53	91.07	90.81	166.19	114.01	270.74	86.06	159.14	230.64	154.79	103.16	296.37	200.49	264.46	155.01	143.29	58.58	229.67	12.48	25.96	-1.20596			Metallophos,Metallophos_C,Pur_ac_phosph_N
TdChr005.147	0.57	29.5	0.92	0	0	0	0	0.15	0	0	0	0	0	0	0	0	0	0	0	0	0	0	25.93	260.3			NF
TdChr002.446	204.64	169.69	76.76	57.63	82.83	62.37	170.52	254.43	47.46	232.1	16.46	33.24	42.56	117.12	26.31	16.69	24.32	27.51	49.44	335.74	30.89	5.47	25.85	-0.201467			DnaJ,TPR_1,TPR_16,TPR_2,TPR_8
TdChr002.1985	47.9	141.32	87.72	113.88	23.48	27.8	44.78	36.28	62.69	43.37	37.57	59.05	50.38	52.19	86.3	55.26	75.16	59.66	47.09	34.51	99.64	22.03	25.81	-0.762305			Ribul_P_3_epim
TdChr002.1111	157.86	129.38	74.76	71.83	64.19	46.48	110.69	125.97	22.48	111.92	14.66	34.62	34.65	72.64	18.53	17.7	39.06	32.34	33.03	201.64	30.74	2.08	25.76	-0.204413			Mago-bind
TdChr006.958	1.57	7.53	1.05	2.98	2.28	7.91	12.1	6.63	30.06	0.87	61.53	96	182.99	44.91	22.69	31.32	96.28	228.16	67.26	0.2	55.34	0.05	25.73	0.0561667			NF
TdChr001.2663	0	0.82	0.24	0.26	0	0	0	0	0	0	0	0	0	0	0	0	0	0	0	0	0	0	25.72	258.2			NF
TdChr002.683	76.4	93.42	34.56	93.86	85.18	49.61	103.29	136.25	60.42	135.24	34.58	75.66	56.43	89.07	49.6	43.27	80.37	62.3	84.53	186.35	59.87	37.91	25.71	-1.1943			V-SNARE_C
TdChr005.1613	239.28	84.79	71.39	65.15	152.94	98.45	84.16	90.4	33.92	61.04	14.79	34.49	23.62	38.6	24.78	12.96	13.72	13.2	22.28	77.65	5.46	0.46	25.7	-0.139107			Cofilin_ADF,SH3_1,SH3_9
TdChr006.499	48.29	10.74	32.36	60.9	114.92	108.28	113.07	121.28	103.07	133.19	48.64	93.69	75.19	87.59	57.39	50.87	68.67	52.46	59.97	110.91	62.33	0.35	25.68	-0.652446			MBOAT
TdChr003.343	122.64	228.76	166.31	60.72	65.11	55.34	96.23	119.67	20.95	221.47	14.87	28.39	47.94	115.6	44.91	45	37.79	55.15	38.24	178.4	55.44	31.94	25.66	-0.371049			Mss4
TdChr003.2107	71.04	39.81	32.5	43.68	25.5	22.01	48.89	62.99	34.8	84.08	43.65	29.26	47.25	39.7	19.58	28.11	15.99	34.48	16.68	71.38	17.46	0.74	25.63	-0.401192			MBOAT
TdChr001.1672	0	0.38	0.12	0.13	0.38	0.68	0.26	0.13	0.41	0	0.35	0	0.54	1.32	0	0.36	0.55	0	0.96	0	0.3	0	25.6	44.1739			FLYWCH,MULE
TdChr001.3543	90.96	61.95	63.36	40.57	47.39	95.32	77.61	76.19	30.47	79.13	22.19	56.78	78.9	114.07	63.85	41.56	54.51	54.24	95.43	113.68	79.7	2.49	25.55	-1.0762			NF
TdChr002.3050	108.78	105.15	120.68	81.92	84.93	69.61	112.75	129.15	64.66	148.53	36.04	122.42	115.06	111.69	77.61	53.49	127.2	120.34	84.62	214.08	123.99	13.09	25.55	-1.73043			DFRP_C,RWD
TdChr005.211	56.39	15.94	35.89	39.09	54.64	32.49	68.55	96.12	49.57	57.96	12.85	31.39	25.44	38.45	19.13	11.86	14.96	15.17	26.22	37.56	8.96	0.07	25.51	-0.200173			Gelsolin,Sec23_BS,Sec23_helical,Sec23_trunk,zf-Sec23_Sec24
TdChr006.2044	318.61	380.66	133.38	60.98	52.14	84.8	83.6	99.52	15.99	112.9	13.95	24.05	25.57	47.52	28.28	15.35	30.85	22.17	16.82	133.43	29.55	3.77	25.5	-0.0759219			60KD_IMP
TdChr001.2936	0	2.78	1.99	0	0	0	0	0	0	0	0	0	0	0	0	0	0	0	9.86	0	0	0	25.49	255.9			NF
TdChr006.193	154.7	46.21	49.19	45.18	39.53	38.12	66.47	90.61	29.76	116.3	19.67	40.13	28.97	56.61	35.83	28.03	36.72	21.15	20.06	98.73	16.39	3.56	25.48	-0.477805			DUF1682
TdChr006.677	92.45	107.19	63.59	27.39	17.65	16.06	37.75	50.03	12.65	55.5	7.19	27.29	16.32	29.92	21.68	10.89	24.8	15.92	14.89	94.49	22.97	6.22	25.43	0.0260714			PDCD2_C,zf-MYND
TdChr006.635	257.11	115.15	44.28	45.66	59.47	36.93	58.12	63.14	48.4	63.91	46.56	96.58	46.69	46.06	50.57	46.99	69.66	41.02	46.87	48.17	37.26	3.9	25.41	-1.30697			SCAMP
TdChr006.1710	154.47	140.4	89.15	50.41	38.65	52.83	57.57	75.46	17.27	88.13	9.99	28.39	20.83	39.2	20.82	15.35	30.83	19.65	22.26	108.84	24.14	3.89	25.38	-0.116838			EF_TS
TdChr002.3306	179.5	152.5	159.36	61.72	36.81	55.18	131.37	207.88	9.29	193.94	10.02	24.44	35.1	77.54	18.68	11.96	21.16	16.71	13.04	129.85	21.83	0.03	25.36	-0.0852984			AAA,DUF3523
TdChr005.2210	0	3.51	4.58	5.52	17.66	12.88	14.29	9.9	35.63	3.4	216.58	35.73	87.25	31.65	140.61	50.04	109.2	183.48	135.67	2.32	96.31	0	25.35	0.00115168			NF
TdChr005.1461	145.09	211.88	74.69	69.87	62.77	55.2	52.49	58.75	43.58	70.32	31.24	51.97	59.81	56.34	73.39	54.32	60.73	52.11	43.9	72.13	64.16	113.61	25.33	-1.8071			CCDC53
TdChr002.2334	200.7	77.91	31.12	32.32	18.19	12.79	48.34	63	21.41	65.56	15.47	23.59	22.57	38.01	26.55	19.9	18.57	19.49	16.41	65.81	14.7	2.29	25.3	0.0727054			Prenyltransf
TdChr002.2001	55.62	93.35	2.42	4.02	0.19	0.34	0.51	0.13	0.13	0	0	0	0	1.05	0	0	0	0	0	0	0	0	25.29	28.8523			NF
TdChr002.2390	447.86	351.53	127.51	43.58	39.88	21.57	48.81	55.26	10.96	138.42	21.46	22.43	37.14	67.88	38.7	49.97	47.37	54.25	44.32	135.18	84.49	0	25.26	-0.488189			LSM
TdChr001.3205	167.73	90.1	51.98	80.51	83.42	81.37	110.79	87.48	200.93	117.17	68.11	74.49	81.63	94.87	369.13	111.72	111.06	82.72	54.4	171.4	103.92	275.12	25.26	-1.9265			NAD_binding_10
TdChr005.664	6.45	117.98	70.15	57.66	44.49	38.37	34.75	18.75	51.25	10.93	11.99	48.53	33.97	26.49	106.23	19.9	71.47	28.17	42.35	6.24	188.39	0	25.21	-0.267953			Transket_pyr,Transketolase_C
TdChr001.2314	178.62	164.19	82.87	55.94	37.79	29.6	83.61	121.93	10.97	135.42	12.37	19.19	22.04	51.71	14.88	14.26	19.46	15.11	12.54	205.53	25.74	1.46	25.19	-0.00658424			Noc2
TdChr001.245	200.84	156.02	61.55	60.48	80.04	51.24	54.46	78.2	54.17	75.31	28.76	70.41	43.06	56.06	44.76	38.86	76.69	50.96	48.01	95.36	57.91	34.1	25.17	-1.03618			Longin,Synaptobrevin
TdChr004.705	0	22.55	72.47	45.34	82.31	45.75	54.3	100.84	51.11	192.23	20.07	78	60.37	202.83	16.15	19.52	58.59	63.74	12.67	20.93	63.74	0	25.16	-0.541872			NF
TdChr001.751	134.19	69.98	66.51	56.19	97.24	55.27	76.92	90.87	40.14	103.96	37.1	76.74	56.61	64.71	44.06	46.86	58.56	44.14	50.6	67.3	23.31	0.14	25.14	-1.06846			zf-C2H2
TdChr005.1094	206.58	188.63	89.43	86.28	124.34	80.74	108.95	116.32	123.43	132.49	75.88	168.68	210.84	202.54	147.35	110.29	186.65	229.62	292.89	102.27	167.1	2.3	25.11	-1.07879			Snf7
TdChr002.601	77.43	132.77	95.25	65.55	46.05	76.72	78.06	72.35	25.39	78.15	29.77	47.01	39.78	60.14	32.66	27.1	40.55	42	23.14	224.69	72.83	0.28	25.07	-0.475196			Ribosomal_L23
TdChr005.1103	139.96	181.08	58.33	64.69	87.19	93.66	75.61	77.21	34.56	103.63	24.08	44.63	44.4	56.65	45.42	45.84	64.12	42.71	42.27	107.15	49.79	0.5	25.07	-0.812492			Vma12
TdChr002.3245	86.5	52.17	36.77	41.37	36.71	53.11	51.19	45.95	71.74	52.9	43.32	95.16	72.72	58.65	182.24	71.3	96.41	92.29	84.17	58.47	91.37	8.39	25.03	-0.817157			UQ_con
TdChr003.2103	313.57	259.68	151.69	77.95	52.76	54.48	140.69	192.52	28.73	183.2	19.09	41.26	35.81	95.13	40.11	24.75	38.84	39.78	28.2	371.72	77.56	3.12	25.02	-0.242414			Cgr1
TdChr005.1087	136.12	115.35	91.61	78.97	52.54	60.69	121.37	131.39	35.87	137.06	23.12	53.31	68.1	84.86	49.18	26.58	59.8	68.97	56.73	180.58	94.52	14.68	25	-0.793724			Ribosomal_L14
TdChr005.958	30.15	54.78	74.26	59.67	41.49	47.7	64.52	63.51	18.09	60.96	14.41	29	20.07	33.05	20.33	14.47	25.13	13.86	12.78	78.55	22.16	1.48	24.99	-0.102236			EFG_C,EFG_II,EFG_IV,GTP_EFTU,GTP_EFTU_D2
TdChr005.354	167.02	142.38	70.6	66.43	113.28	66.75	95.38	102.7	106.35	93.92	59.31	200.26	153.04	110.7	100.62	104.11	177.25	182.42	142.41	141.99	286.36	30.17	24.98	-1.23953			VPS28
TdChr006.1640	0	0.09	0.05	0.05	2.99	0.34	0.57	0.32	1.19	0.05	0.04	1.14	0.94	2.47	4.12	0.08	2.69	3.27	6.89	0.03	14.44	0	24.95	8.47059			NF
TdChr004.771	60.25	97.7	29.02	21.07	10.49	17.57	68.98	85.06	36.17	72.46	19.66	64.91	51.1	74.64	11.2	22.29	52.32	48.32	51.63	143.88	71.36	2.37	24.95	-0.536119			TPK_B1_binding,TPK_catalytic
TdChr003.233	136.33	121.44	84.15	54.64	51.7	86.13	62.74	68.03	18.46	94.48	22.65	42.45	43.33	59.17	33.44	36.12	44.42	38.32	35.91	110.07	42.04	1.06	24.93	-0.482638			MRP-S28
TdChr006.1331	158.58	185.19	102.14	89.53	115.88	80.5	93.25	99.1	63.58	111.9	44.04	147.48	76.82	88.25	48.22	55.46	134.37	77.45	92.47	153.25	87.13	6.26	24.93	-1.47294			Pox_MCEL
TdChr001.271	87.84	71.71	40.83	49.59	65.21	46.35	87.6	107.33	76.68	142.32	40.97	67.13	76.56	94.73	109.87	68.34	77.15	77.57	86.94	83.95	51.35	1.43	24.92	-1.39675			Peroxin-13_N,SH3_9
TdChr002.2236	113.4	125.15	45.78	42.37	29.04	101.49	103.15	76.8	71.45	122	49.13	59.84	52.76	100.43	62.37	42.23	45.11	86.59	47.95	228.06	93.25	1.61	24.9	-0.671941			Complex1_LYR_2
TdChr006.765	70.62	73.74	87.83	61.31	104.14	68.53	82.17	97.09	38.95	120.99	39.42	60.41	53.05	62.47	62.62	48.43	63.3	53.01	41.01	124.21	57.86	1.8	24.89	-1.37114			Actin
TdChr001.2598	319.65	206.35	136.89	86.02	128.39	74.31	128.32	168.84	81.69	185.98	49.16	73.03	81.61	167.24	63.79	51.11	45.22	62.16	202.68	161.94	46.24	7.36	24.88	-0.524825			Ras
TdChr001.3125	419.69	51.3	87.19	83.87	160.72	122.72	233.9	309.57	77.32	287.86	27.35	78.32	63.16	123.69	25.14	16.69	34.41	33.47	74.67	132.9	12.62	3.97	24.88	-0.534163			-
TdChr003.2339	378.21	144.31	164.75	140.77	175.57	33.02	146.2	214.72	45.68	170.23	9.25	28.52	54.9	71.52	41.99	12.79	16.97	22.15	18.79	90.6	43.43	1.03	24.87	-0.16997			Filament,LTD
TdChr001.2439	0.34	1.61	1.12	0	0	0	0.14	0.57	0	0	0	0	0	0	0	0	0	0	0	0.78	0	0	24.83	73.3235			-
TdChr004.1644	72.1	146.67	107.57	105.07	216.75	123.35	77.46	36.59	131.3	29.01	49.45	183.99	127.4	158.08	100.81	62.51	123.36	105.46	203.15	31.07	56.73	1.85	24.83	-1.0495			SH3BGR
TdChr006.423	93.52	58.85	54.31	52.41	66.05	41.68	62.34	76.48	39.49	84.46	15.77	39.54	41.5	61.8	31.51	15.38	26.55	29.16	46.88	90.76	28.54	0.49	24.81	-0.503301			DNA_pol_A_exo1
TdChr001.3520	2.48	5.72	72.18	59.2	142.38	101.95	63.55	43.04	80.16	33.52	33.04	154.3	55.08	47.38	59.19	41.68	122.88	53.09	53.74	24.26	62.51	0.49	24.8	-0.831483			NF
TdChr005.604	0.79	38	10.41	4.5	21.04	5.28	0.8	0.37	0.95	0.09	0.13	0.28	0.81	0.2	2.27	1.24	0.64	1.43	1.11	0.13	1.06	0	24.77	7.56962			Sulfotransfer_2
TdChr003.371	70.4	132.18	116.54	51.31	36.52	51.62	65.29	116.62	13.97	160.8	11.36	25.52	23.42	64.44	17.49	14.22	24.36	12.6	11.78	160.95	16.68	0.24	24.77	-0.0123821			HATPase_c_3,HSP90
TdChr006.1443	36.29	84.05	109.73	66.55	63.5	39.29	67.69	73.53	32.5	77.99	29.71	63.35	36.6	48.29	36.42	43	62.14	35.04	27.76	86.52	21.02	5.39	24.73	-0.543199			WD40
TdChr005.542	78.2	85.51	31.17	40.4	40.16	28.5	59.95	65.15	71.7	63.03	32.96	54.06	44.06	58.35	95.65	48.44	53.61	59.41	65.51	75.48	58.95	12.38	24.73	-1.3328			NF
TdChr002.1419	105.12	119.59	86.57	88.77	147.78	74.59	142.16	209.68	49.86	210.95	47.54	106.72	55.19	109.79	43.21	39	45.66	32.2	48.63	218.26	21.72	5.71	24.69	-0.707839			zf-AD
TdChr004.1799	0	0.31	5.79	13.92	3.2	2.8	35.62	17.19	120.36	1.55	24.41	59.43	10.41	20.61	40.15	1.42	30	3.81	33.55	0.51	4.36	0	24.59	0.566217			MFS_1
TdChr003.1472	62.96	27	60.34	31.16	53.37	78.41	142.51	236.7	24.72	293.5	31.68	59.46	73.3	145.86	46.91	39.59	53.51	53.02	63.27	64.96	23.14	0.08	24.56	-0.763026			LsmAD,PAM2,SM-ATX
TdChr002.3093	304.76	49.17	0.48	0.07	0	0	0	0	0	0	0	0	0	0	0	0	0	0	0	0	0	0	24.55	246.5			NF
TdChr006.2022	0.17	3.59	7.12	1.99	0	0	0.08	0.07	0.03	0.03	0	0.11	0.19	0.06	0.17	0	0.07	0.02	0	0.06	0	0	24.52	90.963			NF
TdChr005.835	166.26	220.47	88.67	60.48	47.07	85.83	86.26	70.57	17.7	59.29	23.07	42.9	32.15	55.84	29.11	25.14	28.09	38.39	39.98	147.77	95.89	55.67	24.41	-0.56129			L51_S25_CI-B8
TdChr001.2427	31.57	154.6	101.47	141.23	110.05	117.18	243.69	113.7	287.29	86.79	69.84	310.07	284.25	358.12	181.23	82.32	273.57	295.5	383.18	83.78	342.53	1.9	24.4	-0.581948			PGI
TdChr003.1003	106.53	134.83	87.39	73.81	126.54	57.9	125.16	155.93	77.68	188.15	70.31	140.09	92.02	124.44	84.27	89.33	108.33	92.05	113.61	208.41	123.92	40.56	24.36	-1.82479			DUF410
TdChr001.3565	46.69	53.63	50.48	47.68	48.9	78.71	252.71	119.94	200.34	47.59	45.4	131.04	206.44	1091.54	38.47	30.25	49.42	107.59	1462.19	33.52	80.14	0.2	24.34	-0.327362			2-oxogl_dehyd_N,E1_dh,OxoGdeHyase_C,Transket_pyr
TdChr006.781	98.75	82.58	42.63	30.67	30.83	34.51	96.99	139.33	33.66	195.68	121.37	39.57	51.02	82.01	66.08	92.52	39.11	44.27	33.61	196.03	50.35	12.53	24.33	-0.426526			Galactosyl_T
TdChr003.1672	189.25	169.22	117.84	52.35	58.57	71.28	73.81	92.28	14.67	102.13	12.71	30.31	27.11	39.76	24.98	16.15	29	30.41	20.09	117.96	45.55	4.86	24.31	-0.262393			Ribosomal_S16
TdChr002.3034	109.71	99.34	52.2	33.15	36.73	45.62	138.37	116.69	117.66	131.45	61.39	187.82	186.96	1253.68	44.73	71.42	168.28	241.76	1538.69	131.9	267.45	0	24.31	-0.716404			Fe-S_biosyn
TdChr006.1109	27.46	34.57	58.24	25.7	20.05	41.41	114.97	117.22	37.06	190.6	35.41	79.2	66.1	45.08	18.9	76.37	51.25	11.12	55.37	112.41	70.93	0	24.29	-0.438626			Ribosomal_L2,Ribosomal_L2_C
TdChr002.1833	267.93	164.32	38.43	56.98	89.86	69.54	108.07	149.46	50.89	168.61	28.81	90.16	52.55	75.4	56.32	53.41	84.26	49.76	36.16	238.73	72.06	9.82	24.23	-0.924729			Sec62
TdChr001.3313	71.58	118.87	67.76	50.78	33.79	38.48	112.38	101.33	24.28	145.64	19.66	43.05	43.67	79.48	25.47	17.72	48.14	23.36	34.68	220.49	81.93	0	24.18	-0.346683			Pet191_N
TdChr002.171	76.2	49.18	29	34.73	30.96	24.41	51.84	71.55	34.98	71.41	25.89	58.2	38.1	56.87	34.12	31.81	55.24	38.83	53.32	64.71	37.6	18.17	24.18	-0.557933			FYVE,Rab5-bind,Rabaptin
TdChr003.489	38.34	34.2	24.07	20.51	54.94	105.18	182.48	201.88	248.06	175.83	121.11	376.06	374.17	271.88	139.04	164.06	395.12	342.09	356.97	37.31	216.11	0.27	24.17	-0.628991			Mob1_phocein
TdChr002.1438	327.74	387.89	97.39	100.61	121.51	80.08	151.58	179.68	47.59	169.82	46.58	98.2	78.04	113.63	35.86	52.22	73.34	76.32	63.37	250.38	120.42	48.82	24.17	-0.92733			LTV
TdChr001.3196	220.9	92.66	55.93	63.32	90.88	53.85	263.4	420.59	43.1	685.77	37.36	149.97	136.84	281.28	90.56	85.32	165.02	119.68	135.87	445.25	98.04	4.1	24.08	-0.553528			zf-AD
TdChr005.470	6.15	1.28	57.34	35.89	94.45	48.27	66.13	57.47	40.24	30.21	9.6	14.14	17.07	21.53	8.62	2.72	2.68	4.22	13.39	19.62	1.51	0	24.07	0.215282			BTB,zf-C2H2,zf-Di19
TdChr001.3439	50.89	61.19	24.3	18.51	11.44	26.29	72.37	83.25	124.74	63.4	57.71	89.82	120.62	702.15	39.22	45.07	103.46	102.75	518.42	65.96	204.48	0	24.07	-0.556849			NF
TdChr002.2710	133.03	49.94	78.22	43.71	43.78	40.71	71.09	119.98	24.25	161.19	22.47	43.56	41.18	68.85	30.77	26.91	37.3	27.78	21.15	101.25	30.85	1.09	24.03	-0.399064			ABC_tran,ABC_tran_Xtn
TdChr004.384	68.79	42.65	20.51	35.27	30.68	25.11	42.82	54.7	34.65	50.79	23.06	52.45	31	40.18	24.56	23.64	40.16	26.15	37.67	41.06	20.18	1.36	24	-0.596888			GOLGA2L5
TdChr006.626	185.43	134.93	68.12	60.12	78.74	59.89	89.45	99	108.73	106.87	55.52	97.19	65.83	79.86	117.94	74.18	110.26	70.9	74.78	80.41	110.25	3.8	23.99	-1.36274			PI31_Prot_C,PI31_Prot_N
TdChr006.822	225.56	151.6	68.21	62.17	36.65	45.88	56.32	73.53	39.37	96.92	44.91	49.02	46.64	64.82	55.29	67.06	51.54	46.57	34.44	125.12	65.88	0.57	23.96	-1.39794			UPF0172
TdChr005.1145	198.93	212.37	116.1	70.85	53.73	69.95	87.72	79.54	19.97	92.67	13.59	27.54	18.77	43.68	28.21	19.13	27.7	20.79	14	128.67	36.37	0.46	23.91	-0.195107			MRP-L51
TdChr001.3416	101.72	198.39	141.94	91.2	89.46	36.49	66.23	67.97	10.16	74.18	16.47	27.55	24.95	35.06	34.32	22.57	30.74	22.33	14.18	120.21	31.14	17.8	23.9	-0.175854			RLL
TdChr005.347	59.1	35.88	33.87	30.8	64.1	45.17	66.58	100.78	55.57	127.27	37.06	72.59	80.67	86.38	71.25	45.1	71.47	83.3	92.22	72.67	69.56	1.33	23.89	-1.19333			PH,START
TdChr002.1234	73.21	42.8	2.43	61.37	11.92	0.67	4.71	0.76	6.31	0.21	0.1	0.75	0.78	1.43	7.69	0.42	1.23	2.18	1.42	0.19	0.18	0.05	23.85	3.43707			Phosphodiest
TdChr005.337	41.06	61.04	27.56	21.88	13.97	9.13	30.84	56	13	75.56	16.27	17.7	33.81	50.55	20.24	16.03	20.37	35.53	49.03	97.18	34.71	1.32	23.8	-0.129972			zf-CCHH
TdChr003.1646	24.28	69.86	73.87	72.51	66.95	54.61	56.5	65.94	59.19	65.14	28.1	69.92	40.04	46.77	82.38	31.33	71.17	46.52	43.8	76.55	68.17	6.78	23.8	-1.25721			HAGH_C,Lactamase_B
TdChr002.3561	143.13	122.04	70.95	55.78	57.7	44.66	43.95	44.12	30.45	55.65	24.32	51.65	43.36	39.84	51.48	32.23	44.04	36.68	32.39	38.69	29.43	0.15	23.76	-0.937034			Actin
TdChr002.020	261.68	295.6	73.91	68.01	62.87	94.8	104.59	115.31	44.28	51.26	21.81	42.41	36.05	54.46	26.47	27.94	46.41	50.34	36.31	209.04	91.8	27.43	23.73	-0.479378			rRNA_processing
TdChr004.376	59.65	52.63	46.67	52.49	114.39	65.48	76.3	72.98	105.33	51.38	43.03	211.11	74.45	76.47	91.42	57.78	209.69	79.95	97.7	62.48	41.68	2.71	23.72	-1.23072			zf-CCCH
TdChr001.1003	192.51	268.9	98.68	51.36	36.43	35.82	49.53	64.07	9.99	61.7	16.52	21.54	24.94	30.99	29.32	28.44	33.89	27.67	13.52	85.67	36.77	17.59	23.71	-0.312026			Tim17
TdChr002.3338	29.3	3.78	37.07	39.7	54.08	25.12	109.57	206.13	29.21	259.12	5.61	46.64	21.03	100.17	18.19	2.76	24.6	5.79	16.63	248.49	3.9	0	23.66	-0.0346497			MFS_1,Sugar_tr
TdChr002.2430	150.27	55.75	11.41	15.05	42.53	27.46	54.28	49.44	50.6	53.71	46.46	60.05	87.39	68.92	29.8	45.23	18.06	37.21	75.98	18.45	10.61	0	23.64	-0.63076			-
TdChr002.2031	97.08	151.11	71.57	48.94	43.86	32.8	50.25	64.59	27.07	70.77	22.05	42.41	25.69	44.48	31.27	33.68	43.26	32.45	22.34	99.7	46.66	17.99	23.64	-0.688536			NF
TdChr003.810	16.36	14.28	88.18	108.24	55.56	74.37	98.38	74.69	338.11	31.92	20.89	226.34	51.3	83.76	101.04	18.12	135.5	31.88	96.29	26.66	24.53	0.09	23.59	-0.434344			MFS_1
TdChr002.431	1.33	129.43	0.07	0	0	0	0.22	0.15	0.85	0.14	0	0	0	0.73	0	0	0.31	0	0.14	0	1.2	0	23.58	38.0806			NF
TdChr001.2698	132.43	148.72	143.83	106.62	134.7	93.08	102.94	114.98	104.06	135.65	75.46	156.14	116.92	118.28	92.65	140.16	162.44	113.87	116.44	160.06	165.32	1.65	23.52	-2.41741			GST_C,GST_C_3
TdChr002.1357	135.35	90.21	93.71	77.22	78.4	40.33	116.47	176.85	29.75	164.41	21.37	39.56	41.79	78.21	31.35	23.15	35.74	28.67	27.16	263.68	35.42	8.51	23.49	-0.266348			UBA,UBX
TdChr004.2062	58.03	65.48	51.15	53.48	144.25	81.07	79.86	75.11	78.43	68.92	60.77	163.12	123.3	126.6	81.49	69.63	107.28	105.56	168.23	67.95	85.39	0.36	23.48	-1.26397			GTP_EFTU,GTP_EFTU_D2
TdChr002.2900	2.59	2.15	1.99	5.32	0.43	4.65	0	0	0.61	0.88	0.2	0	0.31	0	0	0	0	0	0.27	0.34	0	0	23.35	15.101			-
TdChr004.1304	38.69	59.42	30.65	40.61	40.08	23.7	36.51	38.37	40.86	26.7	29.11	43.18	29.62	25.94	33.7	30.17	32.22	30.04	23.96	57.51	98.04	63.59	23.34	-0.894507			Thioredoxin
TdChr006.184	235.9	98.95	107.63	52.73	52.01	57.26	95.7	114.51	20.2	153.35	11.35	29.06	35.95	60.76	20.21	15.41	29.9	21.19	18.4	162.15	30.53	0.34	23.31	-0.163441			Peptidase_M24,zf-C6H2
TdChr001.642	84.41	146.9	90.75	50.22	39.64	14.47	23.69	28.52	4.71	37.09	7.42	6.2	12.5	15.92	13.46	7.77	11.63	8.88	7.53	51.48	15.37	2.65	23.28	0.26576			NF
TdChr005.195	654.78	100	104.77	60.76	131.6	85.81	251.44	408.44	94.37	338.76	6.57	17.98	26.88	123.37	5.61	4.25	5.04	6.16	6.05	124.33	5.52	0.16	23.28	-0.317196			DEAD,Helicase_C
TdChr005.334	119.13	100.24	95.36	62.63	44.13	40.27	105.33	157.25	26.47	206.48	20.97	35.88	41.36	87.04	34.08	35.98	47.06	41.55	27.32	247.95	61	8.57	23.27	-0.329943			IF4E
TdChr004.250	129	63.39	27.83	32.84	17.47	15.17	27.15	42.32	10.45	66.42	11.61	15.44	18.18	30.41	16.15	16.47	14.81	14.75	11.42	53.7	12.22	0.39	23.19	0.343464			MFS_1
TdChr005.1084	471.68	55.28	16.54	21.71	24.26	25.8	109.77	157.05	27.56	160.9	14.39	11.19	21.93	52.94	10.73	12.63	7.5	8.87	9.83	97.33	4.36	0	23.15	0.0305202			EF-hand_1,EF-hand_6,EF-hand_7,EF-hand_8
TdChr002.361	272.5	245.6	132.18	58.99	45.51	79.02	69.48	101.72	9.84	126.09	9.52	21.26	23.29	53.06	20.12	13.83	25.68	14.78	11.82	223.62	22.52	0	23.14	-0.0334155			Ribosomal_L21p
TdChr005.863	74.39	40.38	49.3	62.27	39.32	20.35	43.62	74.83	24.99	66.65	21.42	27.67	21.4	31.46	19.72	21.06	19.18	15.67	12.8	63.92	11.41	1.33	23.09	-0.0678605			Glyco_transf_8,UDP-g_GGTase
TdChr001.440	261.06	133.36	135.2	50.54	23.03	36.78	148.73	201.79	5.87	191	7.1	9.78	17.81	65.54	10.16	9.16	7.96	8.75	5.92	364.71	18.86	9.73	23.07	0.00112058			Ribosomal_L10
TdChr006.882	124.91	33.05	44.16	68.12	45.5	0	200.21	432.4	14.07	567.92	13.14	58.55	49.21	211.05	14.05	12.69	28.63	41.48	8.26	414.76	63.77	0	23.01	-0.254982			Chromo_shadow
TdChr005.1972	112.36	94.63	66.22	60.41	85.38	112.44	115.35	96.83	94.7	115.16	40.36	145.23	85.24	101.62	59.1	71.58	165.2	115.02	129.19	140.49	146.96	29.9	23.01	-1.58691			L27,PDZ
TdChr002.2281	12.06	8.31	42.98	31.69	23.21	10.91	32.42	46.95	17.19	55.43	13.94	15.68	15.02	23.53	12.23	11.23	12.06	6.17	12.67	84.7	4.94	0.08	22.99	0.502334			UPF0016
TdChr002.362	152.78	122.77	110.66	54.6	48.09	76.45	76.79	92.58	15.88	131.24	16.75	38.87	34	49.58	49.01	30.61	46.61	36.55	24.19	171.91	40.67	0.53	22.99	-0.476372			Ribosomal_L22
TdChr002.1304	5.79	0.7	15.55	26.55	26.75	19.74	51.23	80.98	27.38	58.37	10.51	13.94	21.82	32.4	5.94	2.77	3.23	6.21	8.59	23.22	1.44	0	22.98	0.360546			zf-C2H2
TdChr003.615	20.09	50.35	18.01	18.76	49.22	32.77	37.98	42.37	46.38	43.58	26.91	58.98	80.26	46.06	30.82	37.12	43.43	57.14	41.32	52.43	45.93	0.2	22.95	-1.01497			RabGAP-TBC
TdChr001.1175	57.4	129.91	63.28	52.64	68.11	49.75	75.74	76.52	101.42	106.74	60.16	179.9	99.4	106.25	104.9	98.9	155.17	92.8	106.45	66.29	145.82	3.1	22.88	-1.56092			Ras
TdChr003.1963	0	0.67	0.76	0.14	0	0	0.22	0.07	0	0	0	0.2	0	0	0	0.1	0	0	0	0.19	0	0	22.86	86.6415			NF
TdChr002.2012	93.56	39.93	2.05	13.35	0	0	0	0	0	0	0	0	0	0	0	0	0	0	0	0	0	1.22	22.85	32.3239			NF
TdChr006.268	30.34	30.98	18.06	24.57	46.15	43.27	34.94	27.22	67.08	20.7	29.78	100.07	50.86	54.77	74.52	30.55	79.01	37.81	71.36	19.19	32.8	2.29	22.82	-0.365655			Popeye
TdChr001.1611	29.11	47.76	33.65	68.67	128.31	97.22	90.27	111.65	38.52	183.75	29.99	67.36	63.38	80.22	47.87	40.56	84.51	65.7	52.8	44.24	123.75	0.07	22.8	-0.844213			TPR_MLP1_2
TdChr003.415	115.36	25.5	107.08	76.39	75.37	33.49	119.26	208.02	16.17	180.62	10.95	24.69	21.32	80.37	8.61	3.56	4.4	4.48	10.72	150.04	3.71	0	22.79	-0.0213878			NAD_binding_11,NAD_binding_2,PWWP
TdChr002.2137	139.5	93.21	44.39	41.77	37.68	33.19	67.42	99.91	27.48	97.84	24.51	62.26	48.76	75.46	38.72	31.2	54.27	45.51	68.07	100.95	36.33	2.8	22.79	-0.609621			DEAD,Helicase_C
TdChr004.091	10.5	6.34	17.83	38.32	67.39	24.94	31.56	28.21	20.44	26.12	19.8	13.45	24.48	16.09	17.42	15.26	4.8	7.2	6.4	13.16	0.39	0	22.77	0.341479			-
TdChr006.381	290.1	146.85	48.4	33.33	25.52	26.71	93.11	138.39	12.82	162.23	13.74	25.82	33.94	78	21.89	17.85	22.41	24.55	31.78	222.27	37.52	3.77	22.76	-0.14143			DEAD,Helicase_C
TdChr003.2212	1.77	162.6	38.69	7.23	65.63	8.3	36.95	25.47	174.2	7.44	220.37	92	220.84	62.87	142.36	361.7	102.33	299.24	111.47	6.28	226.4	0.1	22.76	-0.279597			EcKinase
TdChr003.127	0	0	0	2	1.53	0	0	0.96	0	0	0	0	0	0	0	0	0	0	0	0	0	0	22.73	228.3			NF
TdChr001.3593	138.22	48.87	85.08	64.98	57.71	42.71	101.49	130.6	21.79	156.82	22.48	27.91	42.69	71.9	45.98	25.22	32.87	38.06	26.71	117.27	28.06	3.97	22.71	-0.388066			RRM_1
TdChr005.748	70.75	114.67	104.91	54.66	39.83	46.3	62.37	74.94	12.78	92.46	13.64	23.42	27.63	41.94	21.12	17.89	20.09	18.18	16.14	111.49	24.22	12.86	22.64	-0.102893			Ribosomal_L4
[truncated: 1,786 more rows]
