# Supplementary material for: Coordinated molecular and ecological adaptations underlie a highly successful parasitoid
Source: eLife. 2024 Jun 21;13:RP94748. doi: 10.7554/eLife.94748 (PMC11192535; doi:10.7554/eLife.94748)
Supplement: Supplementary file 5. [file elife-94748-supp5.xlsx]

## Sheet: Supplementary file 5
Supplementary file 5 List of Td chemoreception genes
Type	Gene ID	Sequences
IR	IR_TdChr001.4	ATGAAAATCCTACCCAGTTCATTTTACTTTTGGATTTATTTTTATGGTACAGGAAAAATTTGCGTAGCAAATAATGGCATCATATGGAATAAGAGTTCCGCAAGTTTCGTTCCAATATTTAGTATACGTTCCTTTGCAGCAGTGCAAGAAGACATTCTAGGGAAGAGTCGAGAACTTGAAATCCACAATTTTCGTGGTGAATCACTTCAAATTTCTCATTACGAGGAAATCAATTTAGTAACATTCTATGATAACGACACAAAGATCTCCGGTTTGAATGGCATGATGTGGATGATGCTTGCCGAGTACTTAAATTTTACGTTGGTAATAAATAAGATAGATGATAGAACGTTTGGAATAAAGTTGCCAAACGGTAGTTACAGCGGAATTTTAGGGCAA…
IR	IR_TdChr001.5	ATGCGAGTTTCACCTTTGGGTCTCTTAGTCTTTTTGTTAAGTGTTCTCAAAATCTCACAGTCATTGGAGATTAATAAAACTGAGAGGGCGGTGAAATCCCGAATGAGATCTGCGCAGTCATCATGGCGAATGATGGTGAACTTGGCACAGCTGCAGGCGCCGACAAGGGTAGATATACAAAAAGGATGGGAAGAAGCAATTTCCGAGTTAGCGCATACAGATATTCAAATTTCCTACATAGAGGCGAAAACGTCCCCACGAATTGGCAGTGCCCAACCCCATCCAACGTCTATGCTGAACAAGTTTTGTACCGAGATAAAAAATGGAAAGAATATACTCAGTCTCATCATCGGCGGTGGTTCCGCTGCAAGATTTCTCGTCACCGCTGGAGCCTCGATG…
IR	IR_TdChr001.6	ATGAGCAGATTAGTCAAATTCCAGCAACAACGATTCGACGTTGGCGAAGATATTGAAAACTTGTTATTAAATACGTCTGACATTCATGTCGTGAATAGTGCAGGGGAGCTTGTTTCCTTTTACTCACACGAACAATCAACAGAATTGCAAGATGCTGAAAACGTAAACAATATGGAAGGATCAGTAAGCATTGATGTCGAGGAAGACAATAACGTCCAAGAAGATGCTATTGAAGAACTAGTACTACAAGATAATCATAAAGTTTCAATTTCCGATGGAAATTTACAAAAGTCAAATATTCAGCCAAGTCCTATTTGGTCTCATGTTGAAAGGATAGGGAAAAACATACTTAAGTGTCAGTACTGCAAAAAAGAATTTAATCCTGTGACCCAACATCCC…
IR	IR_TdChr001.7	ATGTACCTATCTATCCGAGTGACTCTCGCTTCAACACGAAAAAAGGAGTGGACGGGTTTGATAGGCGAAATTACTTATGATCGGGCTGATATGATTGTTGCACCATTAACAATAAATCCTGAGCGAGCTGAATTTATAGACTTCAGTAAACCTTTTAAGTATCAAGGAATAACAATTTTAGAAAAAAAGTATATATAA
IR	IR_TdChr001.8	GAACCTGTTAAAGAAAGTCTCCAGTTCTTATTAATATATTTTTTACAGATTTCGGAACAACCCAGATTCTTTAACGAATCTTATTTTTGGTTAATGACGTCCAACTACGAAGTACCAACAAAGGTTTTATCGAAATTACCTCTTAGTATAAATGCGGAATTAACTGTCGCAGTAAGACACTTAGATTCCTACGAACTATTCGACGTATACAATCCTAGTTACCGGCATGGTGGTAAATTGAATGTCACATACCTGGGAGAGTGGAATCAGAAGGATGGTTTCAGATTGGCATTAAATCAGTATAAGTACGATCGTAGAGGCAACTTACACGGGATGTATCTAAATTTTTCAGTAGCGCTAGATTACCAGCCAAAATCAGTCGACTTGGTGACGTATTTA…
IR	IR_TdChr001.9	ATGGAGCGGTGGAATGGACTAATAGGGGAGATCGTAAGAAATAAATCCGACTTTGCCTTCGCTGGCCTCAGCCAGACTGCAGATAGATCTACCGTCGTTGATTTCACCGATCCTTTTTACGATTCAGTGGGCTTCAGCGTCCTGATGAAAAGTCCACGATCTAAGACGAAAAGTTGGGGTTGTTTCATCAATCTAGATCCTAGCGTCTGGTTAACTTTCTTGGCTGCTTATTTTATAACTAGCATTATTATTTGGTTCGTTGATACTTGTTCCCCGTATTCTTATCGCAATCGTCGAAAGAAATATGATAAAGACGATGATACCTCCAAACGAGTATTTACAGTCAAAGAATCTTTGTGGTATTGTTTCACGGCGGTAACTCCCCAAGGTGGTGGAGAT…
IR	IR_TdChr001.1	ATGTGGTCTGTTCCAGGTGCAATTTTCGAACAGGGCACTGACGAAGTGCAGTCTGCCTTCAAATATGCGGTCGGCAACTACAACCAAAACAATACGGGAAATACGGAACGCCGATTCGAATTGCAAGGTTACGTAGATGTCATAAATACCGCAGATGCATTCAAGCTCTCCCGTCTGATTTGCAGTCGGTTCAGCAGCGGGGTGTATTCAATGCTCGGAGCCGTCAATCCAGACTCCTTCGACATTCTACACTCATATAGCAACACGTTCCAGATGCCGTTCATCACACCATGGTTTCCGGAGAAGGTCCTGACGCCGTCGTCCGGCTTCCTCGACTTCGCCATAAGCATGCGTCCGGATTACCATCGCGCCATCATCGACACGGTGCGATACTACGGC…
IR	IR_TdChr001.2	ATGCAAGATTGTGTCACGTCATCATCGGTGGAGGATCCTCTGTACTTGTCCCTATCCTCGACGCGTACACATTCGATATTGCCTGATTTAGCTATGTATGATTCTCCACCGTTTCTGTCTGACTTACATCAAATACATAGCCTTCCTCCTTTGGCTCACAAGGAGCCTTTGCTCATCTACCTCCATCTCAGACTCCTGAGATTGCAGCAGATTTACCAAGGTCTCAGACCTGGAAATGACACATTTCAAGTTGAAACGGTGAAGAGGATACAAAATATGTCCGAAGCAATTGATTTTCTACGCACTCTTGAAGAACTCAGCAGGTGGACGAATAAATACGTTGTACTAGATTGCCCGACGGATATGGCGAAAGATATAGTCGTGAGTCATGTTAGAGAT…
IR	IR_TdChr001.3	ATGAACGTAACTACTGATCCAGAATGGTTGACTCGCATAATTCCTGACATAATAAGTGAACGATACGTTTACCAAGTTACGTGTTTTGTTAAAGTGGATTCCGAAGAGTACATTGATGTGTACAAAGTGGGGCGAATTATTCGTCAGTTTAATAAATTGTCATTGTTGATTGTGGACTTTGACCAAATTAATTTGCATAATGGGAGTAGTGTTTTATCCCAATTGCCTGCGTATGGTTACCCTAGTGCAGCTGGGATCTATCTTATTTTATATTTTCCAAATTTGAATTCTGATGGATATGAGTTTGCTCCAGTAGAAGAGACTCTGGATTCTATTATTCAGATTGCCCCACGAGCACGTCGTCCCAAGACTCTTCTCATCACCATCAGCAATAATGCC…
IR	IR_TdChr002.9	ATGTCTGTGGCTATGCGACACAGGGGTTATACAATACCCTCGCATCTCAAAGTGTCTACGTTTTCTGATTATCCATTTTCTGGTTACTATAAAGACGATAAAGGGAATTTCGTGGGATCAGGATACGTTTTCGAGATATTAAACGTTCTAGTGGAAAAGTATAATTTCACGTATCAAGTTATACCGCCAAAAGAGGACGTAATAGGGGATGCAAATACTGGAGTTATTGGTCAACTTGTCCGAAAAGAAGTTGATATGGCTGCCGCTTTTCTCCCAATAATAACGAAAATGAGAGAGATTGTCGACTTCGGTGTTGCTCTGGATGAGGCGGACATCACATTTCTAATGAAAAGGCCAGGGGCTTCCGCTACTGGAGCTGGTTTTCTGGCACCGTTTACA…
IR	IR_TdChr002.1	GCTAATTCATCGAAAATGTTAGGTTCTCCTTTCAAATGGCTAATAATCACTGACAGAATAGACCAGATGAATGACAAAAATGCATCATTACTTACAAATCAATTTATACATATGGCAATATTCCCTGCGAGTGATGTTGTAATAGCCGAAAGACTGAAAAAAGATTACATAAAAATATCTTCAATTTATCGTCCAAGTACCGTTCGGAATTTTATTTTGGAGGATCGTGGATATTGGAACAAGCAAGATGGTGTGTTTTTGTACAATGGTCATCCAAATTCAAGAAGAAGGCGAAATCTTTTTCAGACACCTCTCAAATCATGTCTAGTGATGACGCAGCCGGACACTGTGAACCACTTGACAGATTATGTGGATAGTCATCGGGATTCTATCACAAAG…
IR	IR_TdChr002.2	ATGTATATCGTCATATTTTTTATTATAATTTGTTTTTCATTTTGTACATCGATAGAGTTCGATGACACGGTTATTAATTTCATAATTGATGCTACTTCCGCGTTATTCCCTCCATCGATTGTCACCGCATTTGTTTGCATCGAAAATGATAGAAGAATTGAATTAACTAAGACGATGTCTAAAGAAGGCATACTTGTTCAATTTCGCAACATCGAAGAAGAAAATATTAATTTCTGGATTTTTCATGAAAAAAGACATAAGCATCTATTTCTTTTGGATCTAGATTGTCCCGGACATGGAGAGACACTCAATTGGGCGAATTCATCAAAAATCTTGGCTTCACCTTTCAAATGGCTATTATTGACAGATTCAACACAATCGAATGATATATCAGAATCA…
IR	IR_TdChr002.10	ATGCATCGCAATGTTGCATTGGGGATTTTTTTGAGTTTTGTAATATTAGAGGGACTTAATGGTCAAACTGTTCGACCTGCATATGTTTATAAAAGCGTCGTTGAAGGGATACACAACTATTTTAATAATACCTGCATCATTTTAATGCACACGACTCCTGATCCTGTTGAATCTCAAGGTATAACTCTTCTGGAACTTCAGTCTTACCTTAGCGGACTTTTCATTCGAACAGCGATTATGGACTTGGGGACTTTTACAAAACGAGTTGGTCAAAGTTACTTTCATATAAAAAGGCCACTATTTGTTCTCTTGAATGATTCGGAAGACCTAAGGCAACAATTTTCTTACGGGATTTCAACGTGGATCACAATGGCTTATCCAACGTGGGTGGTATTTTTT…
IR	IR_TdChr002.11	CATTTAGAAGAGGACTGGTTTTCAGCATTAATCAGACAATCTTCAAGAGTCGGCATCGCTGCGCAAGCAATAAGCTTGGATCAATTGGATAAATATTATTACTATTATTCCTTGGAAACTGTACAACCTTTGTTCACTGTTTTCATAAAAACCGAGGAAAATGTGCATGCATTTATGGCGATTACAAAGCGATACAATATTTCAAATTACACATGGTTAGTTATATTCCTAGAATTTAACTTGCGAGCGAATAATACTGTTGGATGTGACAACCCTCAAGGAAATCCTTTCAATCTTCGATTCAACACGCTCTTCCTGGTTACTTGTGGGTCCCGCAGAATTCTTCGAGAGTGGTATTCTGTACGACCGAACCAAACTGAAACATATGATTTAGCAGAA…
IR	IR_TdChr002.14	ATGTTATTTCTCGTTCTTGTCGGTTCGGTAGCAGAACCTTTCGAAATCGAAACGGACGTCAAATTCAAAGAATACAAACATTACGTTCTTCTTACATCTGATGTTCAAGAGTATTACAGTGCATCCAGCGTTTTTATAGTTTATCCGTCAAATGGAGAAAGTATTCTTGTGACTAGTCTGCTGATGTCACTGCTCCGAGAATTTTCTCGCAAGGGTGTCTTATCTCTCACAATGAGTTTTACGGATGTGCATCAATTTTATTACCACGATCGTAGAACTATCGATCGTCCTTTATTCGTAGTTTTGCTCAGTAACGAAGATGAGATCATAGCATTTGAAAGAGTAACACAATACTTCGACATGTCTTTTCCTGCATGGCTCGTAATATTTATGATACCA…
IR	IR_TdChr002.16	ATGAATATCAAGATATGTGATGTCATTTACAAAGTGACCATTATAGTTTTTTTGGTAAATCAATTACGTGCCGAAATCATTAAACCTCAGCATTATCTCAATATCATATCCGATGTTCAACATTTTTATTCAGCATCGAGTATTTGTATTGTGCACAATCGACATTACGCAGATTTGTTTACAGCAACGTTATCAGTACGAATAATTATCAAATTGTCTCGGCTCGAAATCTTATCCCATTCTCTGACATTCGAAGAACTTCGCAAGGATGCAGATTACTATAACAAACGTATCTCACAATCCTTGTATGTTGTATTTTTGGAATCTGGAAGTAATCTAAACAATTTTGCTAAAATCACAACTGAATACGATATGTCTTCTCATCCTTGGTTCATTATT…
IR	IR_TdChr002.3	ATGTCGAGCAAGATTTGCTTCTACGCGACGACTTTTGCTATTTTCATCGCTAATGTGCTCAGCCAGGCGCCGGTTACTTTGCTTGTCGTCGTAGAGTTACCAGATGCTCCAATGCTGAAAAATATACGAGACTTCGTGGCGGAGACTCAGTCAAAATTGGATGGGAATTTAATAAAAGTCGACGTCAAGTCCGTGGAGGTCGACCGTGAGCACGTGGACGATAATTTTGCAAAAGTTTGTGCACAATTCGAGACTGGTATCACGATGATCTTGGACATGACGTGGACCGGTTGGGATAAGCTTCGTGATTTAGCCACTAATAATGGAATAATATACAAGAGGGGCGATACGGCAATTAGTTCGTATGTACAAGCGATGGACGATCTCATGATGAAAAAA…
IR	IR_TdChr002.4	ATGAGTTCGTTCCGAATTTTCTTGGCTCTGGCAGTAACCGTCACATCGTTTGCATCAGCAAACTTTCGGAACGGACCGATCCAAGCTGGTGACGCCATCGGTGTCAATCCTTTGTCATGGGCGTTAAGTTCTCCAGATTTATCGGAACACTACACACAATACTTACCATCGTTGGATAATCTAAAACATGGTACTCACCCGATACCAGCCATCGAAACCAGTGAACCGTATTTCTCTTCAGCGTCTAAGAGGATCCCAAAAGAAAACAAAGGTTTTAAAAAAGCAACCAAAGAGGATCGTAAATTTAGCAAATTAGAAAGTTCTAATTGTCAAGAAATCAAAACTAAGGGAAAAGATACAGCGCCAGGTGTTACATGTTACAAATGTAAGGATCCGAAA…
IR	IR_TdChr002.5	ATGCATTCTCCAGATAGTCTTAGTGGAAATCAAGCAAATGAAACGAGGATGTTTATATTCCCATATAAATGGCTAATTCTCACTGACCAAATTGACCAACCTGATAATGTTACAAATAGTACAGAAATAGCTCTCGTCGAAAATGGAGCATTAGTGGACGCCAAAGATTCAATTGATTCTACGAACGAAAAACTGATAGAAATTTTCAGTGACTTTCCCTTCTGGCCAGACAGTAATGTAGTAGTCGCTGAAGGTTTCAGACAGGATTATGTTAGAATCAGGTCGATTTATCGTCCGAGTCCAGTACGAGATTTTATCGTTGAGGATCGGGGTTACTGGACAGAAGATAAAGGGATTGTTTTAATTGGCACTCAAATTGCATCCAGAAGAAGATGGAAT…
IR	IR_TdChr002.6	ATGGTCCATTGGCAGTTATTGTTCATGTTGGCGTTATCGATGAGCGGATTTATTGACGGATTGACGAACCAACAAGGAAGTTCGATACAGAGAGGTGAAAGCGGCGTGAAAATCGGAGGCAGCGATCGCGGCTCGGGATCTCGGAGAATCGGAACCGGAACCGGAAGGGGAAGTTCCGTGATCCGCATCGGCGAGGGAAAAACTCACAATTCCACGAGGCAAAGGCCGATTTTAACGACCTCGATGACGAGCACCAATATCCCGTTGGCCTATTACAGCACCCTCATTCCGCAGACGGCGAGCAGCGAAATGCACAACATGACTGATCTCAAGGTCGGCCTGGCAGTCCCTCACAAAACTTTCGGTGCACGCGAGTATACGAAATCTATCAACAAAGTT…
IR	IR_TdChr002.7	ATGCGCTGCATATTCCTACTTCCGGTAACGGCGTGCGCCGGTATCTTTGTAAATTACTCCATGCCACCGACGATACTTACTTTACAAATGGTCCTGGAATATATTTGGGATCGAGGATGGAATCAGGTGGTGATCTTCGATTGTCCTGATTCGATGGGTTGCGCCCGAGCGTATGCCAAACCTCTTGTGACTTGTTTAAACGATATGCATGTGCAAATCAGCATTCAATCCATAGCAAGTCCATTACTACCAGATGTTTTGGAAGTGAAACAACACCGCGTTGGAGCAGTTTTTTTCCTAGACGACGTCGATTTCAATTCGACTAATCATAAGCTAGCAGAGTTTGACAAAAATGACTATTTTCAATATTTCATTTCGTGGCTCCTAGTCAGTACGAAT…
IR	IR_TdChr002.8	ATGCAGGCTAATTCAAGCAAACTCTTTATTGGGCCTATTAAATGGATGATTCTTCTTAACTGGGGAATATTACGCAATGATTCGAGACACTTGGAATTCTGTGGAGAAGAAAGGTGTATTTATAAAGAACTATTTGGTAACTTTGCTATTTATTCAGACAGTGAAGTTATCATCGCTGAAAGATCAGATGAAGACTATGTCAAAATTCTTAGTGTTTATCGTTCAAGTCCTGTTAGGGAATTGCTTGTGGAGAATAGAGGATATTGGACAAGTAATGATAGCGTTCAACTTTATGATACATTTGCAGCTTCTAGAAGACGTATGAACATTCATCAAACCCCGCTCAAAACATGTTTTGTGATGACTAATCCTGATACGGTGAATCATTTAACAGATTAC…
IR	IR_TdChr003.1	ATGGCGGTCGGAGGATTTGCGTTATTTATTCTAGCAATATTGTCACCACCGATCCAAGCCGTTCTGCATTCAATAAAAATTGGGGCCATTTTCCATGAAGGTGATGAAAGATTACTGGATGCATTTAATATGGCTCTTAATGACATCGATGACGAAGGAATGCACGTATTTCGCCTTCAACCTATCACAAAAGAAAACATTCCTAGAGATAGTTTTAAGGCATCGATAGCAGCGTGCGAGCTCCTGGCAGAGGGCGTTTCCGTGATTTTCGGCCCGGGAGATCCACTTACGAGGGAGGTCGTTTCCAGCATTGCAGCACGATTCGATGTGCCCCACATCGAGTACACGTTTCGTCGACTGGAGGATTACGTGATCCCCTCGTCTAGCGTCAACTTCTAT…
IR	IR_TdChr003.2	ATGCCGGAAGCGGAAATGACTGCGCGGTGGCTACTACTGGCTTCTATCGTGGCCCAAGCTTCCGCTCTTCCTGATGTCATTAGGATAGGTGGACTATTTCATCCGACGGACGACAAGCAGGAGGTCGCTTTTCGCTATGCGGTAGAAAAGATCAACTCCGATAGGGACGTTCTACCCAAGAGCCGGCTGACCGCCCAGATTGAGCAGATATCACCCCAGGATAGCTTCCACGCTTCCAAGAGAGGTAAGTTTGGATCATAA
IR	IR_TdChr003.3	ATGGAAATTCCACACTTGGAGACTCGATGGGACTACCGACTCAAAAGGGAAGGATGTCTCGTCAACCTCTATCCGCACCCTTCGGCGCTCTCCAAGGCTTACGTTGATCTCGTCCGTTCCTGGGGGTGGAAGAGCTTCACAATCATTTACGAGAACAACGAAGGACTAGTCCGCCTCCAAGAATTGTTGAAGGCTCATGGTCCCACTGAATTTCCCATCGCGGTTCGGCAGCTCGGCGAAGATACAGATGGCCATGGATATCGGTATGCTCGAGGGAGGATCTCCGGAATACAAATGCCTTTTATTGTCGCCCTCGGTATATTGCGCAGACTAAACTTAAACGCTCAAGTTGGTTGCGAGCGACCGTCCTGTAGTCCCAATATAAAAACCTTAAATGTC…
IR	IR_TdChr003.4	ATGGAAGGTAGCGATAAGTCTCATAGTCTCTGGTTGTTTCTTTGTCTTCATTCAAGTCTTCTTTCTTATTGCAGGCCACTACTAAAGCAGATAAAAAACTCGGCGGAGTCGCACATTGTTTTGGATTGCTCCACGGAAAAGATCTACACGGTACTGAAGCAAGCACAAGAAATAGGAATGATGACCGACTACCATAGCTACTTTATAACGTCATTAGATTTACACAGCATTGATCTTGACGAATTTAAACATGGCGGGACCAACATAACAGCATTCAGGCTTGTGGATCCAGAAAAAATTCAAATGGTAGTACAAGACTGGATTTACGGAGAACAACGATTTTCTAGAGAACTCGACTTCGGACAAAGCAATAAGGTATGA
IR	IR_TdChr003.5	ATGTACACGGAAACTGCCCTGATGTACGATGCCGTGTACCTGTTTGCCAAAGCACTGCACGTCCTGGACGCTTCTCAACAAATCGATATCAGGTCTCTATCCTGCGACTCGACCGATACGTGGGACCATGGATACTCCCTGATTAATTACATGAAAGTCGTAAGTACCCTAAAGTTCCTCCAGTCGAACATCTCGGTTAGTTGA
IR	IR_TdChr003.7	ATGACAGCGGGGTGCAGGGAAAAGTCTGAAAGTAGGGGGCGGGCATGCGCTAAAGGGCGAAACTTCTTGGCAACCAACGGTCGTTCAAATGCTCATAGCAAAGCCGATGCTCGTATTAAGTTAATACTCGTATTCTGGGTTACTATCAAGATGCTTAAAATATACATCTTAATGGCCGTTTTGTCCTACGCATTGGGGTTTTCGAATATAACGTCAATTGGGGTATTGTTCGATTTAGACGAATTAACGAAGCGGGCTTTTATGGTATCTAGAAAAATCATTATGGAGGATGATGTCGACCCCGTTCAGCTTGATCTTTATGCATTTGATGTTGACACGGATATTTTCGACATTTCCCAAAAAGCATGTTCGTTATTTCAAACTGGAGTGGCTGTGATT…
IR	IR_TdChr003.8	ATGCTGGCCGCCAATGTAATTAATAACGGCCATTACGATGAATTTGCTAATTTTAGCGATATGCAAATTTTGCCTGAGGCACATATAGTTCAGAACGATGTAATCGAAGTATCTCGTAAAGCATGCGAGCTGTTCGAAACAGGCGTAGCTGCAATATTTGGCCCGCAGTCGAAATTTACGGCTGAATATATACAATCAATGTGCCACTTAAACGACTTACCTCAACTTGTAGTTAGATGGGATCCAGACGCCGAAAATTTAGCAGCAATAAATGTATTTCCTCAGGCAGACGTATTATCGAAGATTTTTTTAGAGATAGTGAAATTATTTAAGTGGCAAAGTTTTGCAATTTTATACGAAGACGCGGATAGTTTAAGTCGTTTACACTGGATATTAAAA…
IR	IR_TdChr004.1	ATGACGTGTGAAAACAAAACGTGCATAGTTACAACGAACATAAAACCTCCTTTCGTTATGTTTAATGAAACATCCAAGAAATGGAGTGGTTTAATTGTTGATTATATGGAAATGATTGCTACTGAACTCGGAATCCACTACGAATTTCGTGAGGCGCGTGATAAAAGCTACGGATATGAAAATACCGCAGGCAAATGGGGTGGAATGATAGGAGAACTCGTACGAAAAGAGGCTGACATCGCATTTGGAGGCCTCAGCCAAACTGCCTATAGATCAACAGTAGTAGATTTCACTGAACCTTTTTACAATGCGGAGGGATTTGGAATTATTATGAAACGCAGAGAAGTGAAAACAAAACTTTGGGGTTGGCTGACTTCTCTAGAGTTCAATGTATGGCTA…
IR	IR_TdChr004.2	ATGTTTAGATCATTTCAATCTCGATTGTGGTGTTTGCAAGTTGACAATCAATTGAAAACGTTAATTCAGTTACTTATCGAAGAAGTTGCTGAAAAAAGTAAGTGTATCGTTGCTATCACCGATTCGTTTTACCGACGGAAAATAGATTTGAAGACAATCGAAACGTCGAAATATTTGCCAGTATATGAGATGATGATAAAAGACAACGAAGAATTTTCACCGGCAAGAAATCGTGTAACTCTGATTTTGATGGAAAGTAAAAATATCGGATGTGATATATATCTTATTTTATTTACAAATGGATTACAGGCTGCCAATTTCCTCAGCTTTGCCGAAGAACAAAATTTACTCAATACTCGAGGTTATTTCGTACTCATGCACGATTTTCGTATATTACAT…
IR	IR_TdChr005.1	ATGGTTTTCGCAAACGGTGTGGTTTTTCTGGCGATTTTATCATTTGTTGTCACAAATGATTTTCTTGTTGTGGATTATTTTATCGCTCAAGAAGTGCCAAGAGTTGTTGGATTTTCCTGCAATGACATTGAAAAGGACATTTGGCTGGTGAAAACTTTTAGTAAATTCGGAATTACAACGAAGCTAGAACAATTAAATCTAGCAACTGAATACAAGTGGTTGATGAGAAACGTATATTGGAAATTGGGAATTTTCCTTGACTTGCGGTGTAGTAATATATCAGATGTTATTGAAATATTTGCATTGGCATCCCGTTTCAAACTTTATAACGAATTGAATTATTGGTTAGTTTTGGGAGAAGATTTACAAACAAGCATTGCATTCATTGACGACAGTTCT…
IR	IR_TdChr005.4	ATGACTGACGGTGTAAAGAGCATCTTTCGGTTGTTTGTTTCAACTTATCCAAATACTTACTTTGTTCGACGGAAAACGTACGAATGTAATGAGTACTTATTGCTCGTAGCAGACGATCAGCAAGTCATCGATGCATTACGAAGAATACCAGTAATAATATCATCCACGGAGATTTTAATCATTGTTGATTCGCACGTGAAAAGTAATTCAACGCTATTCGATGTTGAGCTTTACGGAAATTCAAACGCTAATTTGGTATGCCGATCTACAATGTGGACTTTGTCGGAAAATTATTTAGTGCCCCGGAAGTTTAAGAAGATCAAAAGTTATGCTGATATGGAGCGGAAGACTGGAATAGTTGATTTTCACGGGAGAATGGTACACGCATCATCGTGTTAC…
IR	IR_TdChr005.5	ATGCATACTGTCATTGTCGAAAAAGGATTTTTCAAGGACACTGCAGAATATAGGAAAATTTTGATAGAAATTTCGGAAATAATTGGTGGCTCAGTTGGAGATAATATGAAGATTAGCGGGATTTCAGTCAATGTGTTCGGAGATTCGAATGTAAATTTGCGCCGTGATTATACTGTGCTGCTATCTATTGCACCGTGTTCTGCTACCTGGGAATTAGCAAAAATGGCACAGAAAGAAGATCTTATTCATCTTGCTATTACTGATCCCGATTGTCCGCGATTTCCATCAACCGAAGGAATAAGTTTTCCTCTTATATATCCTGGGCAAGAATTAGGACAAATTCTTCTGGATTTGAGAATGACTCGGAGCTTATCATGGCCAAAAATGAACATCATATAT…
IR	IR_TdChr005.11	ATGACTCAAATTTTTATTTTGTTTCGCAACAATTCTTCTGAAATTTATAAATTGTTTTTATACACGTTTAACTGTCTATTCATCAATGATATGAACAACGACATCGCAAACAAAAGTTTTTATTACGGATTAAGAAGTATGGCCAACAAAAACATTTTGCATAGATTCAACAATCTGACAATAGACAAAAATGATCCGGCAAAAACTGAAGAAATGCTCTGTACCTGGTGGAATCAGGTTTACAACAATTCAGAACAACGGCCAGACTTCATTTTAGACACGACAATTAATGGTCGAAGCTCAGAGGTCATTAATTCATTTACGAGACAACATGGCATTCCTACACTCTCAGCTCAGTTTGGTCAGGAAGGTGACCTTTACGGTTGGGAAGGACTCAAT…
IR	IR_TdChr005.12	ATGGCTTTGGAAAATAAGGTGTATAAAATTGTGACCCACATTAAACCACCTTTTATTATGTATGAATCAGAAATTAATTTATGGACAGGATTATTCATTGATGTCTTAGTACGTATAGCCAACATCACTGGCCTCAGGTACACATTGTACCATGTAGCTGACAACCGCTATGGATTTTATAACAAAACATCACATGAATGGAATGGCATGATTCAAGACATACTAACGAAAAAAGCCGACATTGCCTTCGGAGGTTTAACGGTCAGAAGAGATCGTGCAGAAGTCGTCGATTTTACCTCGCCATTTTACGATGACGTAGGCCTGTCTGTCCTCTTGAAAAGAAAAAAAATGAATACACAAATCTGGGGCTGGATATTCAACTTCAGCACCCAAGCTTGG…
IR	IR_TdChr005.2	ATGAAGGGGGAACCAGGCTGTCTTCTGGCCTTCATTTTTCTTATACATTTCGTCTACCTGATCACTATCGCCGATGCATTACCACCTGTAGTAAAAATTGGTGCTATCTTCAACCATGACCAAAGGAATAGCAGCACCGAGGTGGCCTTCAAATACGCTGTGTACAGAATAAACAAAGACAAGATTATACTGCCGAACACAACTCTAGAGTACGATATACAGTACACGACCAAAGAGGATTCTTTTCATGCCACTAAAAAAGCTTGCCAGCAGGTTAAATTCGGCGTGTTGGCGGTTTTCGGTCCGTCAGATCCGGTCTTAGGTCAGCACATTCACAGTATATGCGACGCACTGGATATACCTCACCTCGAAGTCAGGCTGGACCTGGAGCCCGAGGTG…
IR	IR_TdChr005.3	ATGTGTTTCATGGAAGCTGCGGAGGGTTCATGTGCTATTTTCACCGAAGACCAAAAAGACACGCCCACGGAACTCGCGTTCAAGTACGCCGTTTACAAACTCAATCAGGAAAAAATTGTCCTACCCAACACTACCGTAGTGTACGATATCCAGTATGTGCCTAAAGACGATTCGTTCAGAACGTCAAAAAAAGCTTGCAAGCAACTATCCAGATCGGTGCAAGGTATTTTCGGTCCTTCCGATCCCCTTCTCGGTGCTCACATACAGAGTATCTGCGAAGCCCTCGACGTGCCACATATAGAGGCCAGGGTGGATTTTGAGCCTAGCTTTAAAGAATTCAGCATCAACCTGTATCCTTCCCAGGATTACTTGAACAGGGCGTTCAAGGACCTCATGTCC…
IR	IR_TdChr006.2	ATGGAAAAGTGCCGGAATTATTTGATCTTTTTGGATAACATTTTTTTGCTACCTCACTTTTTAGAACGTGAAACTACTAGCAAGATTATTATTGTATCAGAAGAGTCACCGTGGACGGTGAAGGACTTTTTGAAGAGTCATGTTTCGTCGTCTTATATCCATTTGTTAATAATAACACACAGCATGTCTGATAGGACTGGTGTTGGATCCTATTTATTGTACACGCACACTCTATTCGCAGATGGCAGTGGAGGTAGTGATCATCTGCTGTTGGGTTCTTGGGTCCAAACAAATTTCACCAACAATGCAGTTAATTTATTTCCCGCAAAGTTGAAGGGGGGATTCAAAGGTCATCGACTTTCAATTTCAACTGCTCACAATCCCCCATTTACTATACGA…
IR	IR_TdChr006.1	ATGAAAATATTCCTGATGATTTTTCTTCTTTATTATGTTAAAGTTACTAATAGCACTTGCATAAGTGGCCTTGGAGATTCTACACCAAAAAATATTGTAAATTCATGGAATATTCAGTCGCTGAAAAAATTAAAGTCTCATGCCGCCTCGTGCAGTCGATCACTCGAGAGAAGAAATTTCAACAGAAAAGTTTTCCACCTTAACTACTTTGAGGAGAAAAATTTTGTTAATTTCTACGATAATAAAACTAAAATATCTGGAATTTGTGGTGAAATTTGGAACATGCTAGCAGACTACTTAAATTTTGTTCTGATATCAAGGGTACTGGAAAGCAATTTGGATTTCGGATATAGATTACCGAATGGAACTTTTACTGATCTTCTTGGCAAAATACAACGT…
IR	IR_TdChr003.6	ATGCAGAACGTAAACGCCAGGTTATATAATCGCTTAGTATCGCGTTTGCAAAGGTCGGGTAACATCGCGTTCAGTCCATACGAGTGGGACAATCCCCATCCGTGCAACGGTCAGGCTGAAGCCCTTGGGAACGAGTTCACCCTTATAAACTCGCTCTGGTTCACCATAGGCTCGCTCATGCAGCAAGGCTGTGATATAGCGCCGAAGGCGATGTCAACGAGAATGGTGGCAGGAATGTGGTGGTTCTTCACGCTAATCATGATATCATCCTATACTGCAAATCTTGCAGCATTTCTTACTGTAGAGAGGATGGATTCACCGATCGAAAGTGCTGAAGACCTCGCCAAGCAGACGAGGATCAAATACGGTGCACTTAAAGGTGGAAGTACTGCAGCGTTT…
IR	IR_TdChr005.6	ATGGTTGTAATCAACGACGAAGCGAATGACATCGCCAACAAAAGTGTAACCAATGCTCTACAGGGGTTAAGGGGTGAGAATCCCGAGTTATTGGGGAAGGCTTTCGTGATGCAGATCAACGGGACAGATGCTAAGGGAACTCTGGATCGTATTTGCAGCTTATGGAGTTCAGCGATTCAGCAAAGAAAAGATTTTATCCCTGATTTCGTGTTGGATACGACCACGGAAGGATTCGGTGCGGAGGTGGTCAGTTCCTTTACCGCAGCACTTGGCATTCCGACCCTGTCAGCCCAATTCGGACAAGAAGGAGACATTTACGACTGGCGAAACATTAATGACGATCAGAAAGGATATCTTATTCAGGTGATGCCACCCGCTGACTTACTTCCTGAAATCATT…
IR	IR_TdChr005.7	ATGCCGAGGCATAGGGTCCTCGCCGTTATCTGGAGGGTTCTGCTGCTCTACTCAATCGTCATCTCGACTGAAGCTCAACGACCTATTAACGTTTTATACATCAATGACATAACAAACACGATTGCGAACAAGAGTGTACACCATGCTCTCGGTGAACTTCGCAAGACGATAGGAAAAGTATACGCTGTCGAAATCAATGGGCAAGATGGACAAGAATCTATGAACAAGATTTGCTCAGTATGGGACAAGGTTATTCAAGACAAAGCCACCCAACCTGACTTCGTTTTGGACACAACTACATATGGACCGGGTGCCGAAGTCGTGAATTCATTCACTGCTATAAAAGGAATACCAACAATCTCATCTCAATATGGACAAGAAGGTGATCTCCATGGCTGG…
IR	IR_TdChr005.8	ATGAGTAAACGTGACGATGGGCAGATATATGTCGTAACAACTAATATAAAACCACCTTTTGTGATGTATGATGAAAAGAAGGACAAATGGAGTGGGTTAATTGTCGATTATATGGACACAATAGCTAAACGACTCAGGATTAAATATGAATTTCAAGAGGCTGAGGACCAAAATTATGGATATGAAGATCAAGACGGAACATGGGATGGAATGATTGGGGAACTTATCGATGGTTCAGCCGACATAGCTTTTGGCGGTCTGACCTACAGCCTTGAAAGGTCAAAAGTGGTGGATTTCACGGAACCATTTTACGATTCAGTTGGTTTTGCCGTCTTGATGAAACGCGATCCGGTTATCACAAATAAATGGGGTTGGCTAAATTCTTTGGAAGTTCACATT…
IR	IR_TdChr005.9	ATGTATGATAATACAAAGAAACAATGGAGCGGATTGATTGTAGATTACATGGAAACAATTGCTTCGCAAATTGGAATGCAGTACCAATTTCAAGAGGCTGCGGATAAGCGATATGGATATAGCAATGCTCATGGTAAATGGGATGGAATGATTGGAGAAATCATCAACGGCACAGCTGATATTGCATTCGGTGGTTTGAGTCAAAGTGCCGAAAGAGCAGTTGTAGTGGATTTCACCGAACCTTTCTACGATTCCGTGGGTTTTTCGGTTCTAATTCCTCGGAAACATGTAAAAACAAAGCTGTGGGGTTGGCTAACATCACTCGAGAACAATGTCTGGTTGTGCATAGTTGGCGCTTATCTTGTAACCAGCATCCTTGTATGGATTTTTGATACTTGG…
IR	IR_TdChr005.10	ATGACTCTTAGTAATAAAGTGTACAATGTGACGACAAACATAAAACCACCTTTTGTCATGTATAATGGGACAACTAAACAGTGGAGCGGTTTAATTGTGGATTACATGGAAACGATTGCTTCACAACTTGGTATTAAATATGCATTTTATACACCTCTAGATCGAGAATACGGAATTCTAAATGCAAAAGGTAAATGGAGCGGCATGATCGGTGAAATAGTAAATGGTAATGCCGACATTGCATTCGGCGGACTTACCGTGAGTGGAATAAGAGCAACAGCAGTTGATTTCACTGAACCTTTTTACGAATCTGTTGGTTTCTCTGTTTTAATGAAACGTCAAGAAGTTAAAACAATGATGTGGGGTTGGCTTACATCCCTCGAATTCAGCGTTTGGATG…
IR	IR_TdChr002.12	ATGCCTGTGAAACGAATTTTCTTGGTTCTTTTAAGATTCTTACTTCTGTATACAGCGGAAATATCCGGAAATGACAATCTGGTCAACATTTTTCACATTAATGACTTATCAAATGAAATTGCGGAAATAGGGTTACAAATGGCTTTCAAAGAATTACGAACAGAAAAACTATTAGGGGAAGTATATTCTGTAAAAATTAATCGTCTCGAAGGAAAAGAATCGTTTAATAACATTTCTGCTAAATGGTCAGATGCAATGTCAAGAGAAGTCTCAAAACGCCCTCATGTTGTGTTGGATACAACTACTTATGGACCTGGTGCTGTGGCAGTTAATTATTTCACTGCTTTAAAAGGATTACCGACACTTTCAACCCAGTATGGTCAAGAAAACGATTTGAGA…
IR	IR_TdChr002.13	ATGAAAGGAGGACTGATTTTTAAGATCTTCTTGAAAATACTGTTTTTTTCCGGTGTATCTGAGTCTGGACCAGTTAATGTTTTTCATATCAACGACAAATCAAATGTGATTGCTAGAAACGTTGTGCCACTGGCGTTTAAATCCCGATCCACAGCTGCCGCTTTGGGAGAAGTGTACACTGTTGAAATCGATGGTCAGCAAAGTGAAGAATCATTCAATACAATTTGTGAAAAATGGGCAAAAGCAATAACAAACGAGCCCTCAAAGCGGCCTAACTTTATTTTCGACACAACTACGCATGGACCAGGTGCCGAAGTGGTACAATACTTCACTGTTGTCAAGGGATTGCCAACGCTTTCAACTCAGTATGGCGAAGAAAACGATATGTATGGTTGGCGA…
IR	IR_TdChr002.15	ATGGATGATTTTGAATTAAGTACATTTTCTTGGGAATTGACGACTGAATTTTCACGATACGCTATACCTCTGGGCATTTCGAAACTTGAGAATTTTGAAGACCTTCTTGCATATTATTCTAAGTTTTCGTTCAAGATGCTTATCGTAGTATTGATTAACTCGTTCGAAACTTTAAACAAGTTTGCTCAAATAATGCAGCCTTATAAGAAACAGAAAACTGTATCTTTTTTAATAATTGAGGATAATGCCAGCATTGAGTTAAATAACTACTGCTTAGCACCGAAGGGCAGTGTATTCAATCTAACGATCTCCAATATTATTGTCAAGTGCCCAGAATCACCGAATCTTATGGAATGGTATTCTAGCAATCCATCAGGTTACCAAGTGAAAACTCGACTA…
OBP	OBP_TdChr006.2	ATGAAAACCTTTAGTCCCGCGGTTGTATTTTTCTTGGCTTTTCTTTATTTCAAGTTTATTGAAATGAAAAAAATGAACGTAGAACAAGCGATTCGGACTGTGCAACCTTATAAAAAATCTTGCGTCTCGAAAACAAAAATTTCGGAAGATCTTGTCAAAGGAACATCCACCGGTTCGTTTCCGGAAGATGATTTACTTATGTGTTATTTTAAGTGCCTATTGACTACAATGAAAGTGACAAAAGGCGGAAAACTAGATTTTGATCTTATAATGGATCAGATAGAACGACTTATGCTGGATGAGTTCGTGACACCATTAAAAGAAATCGCCCTTGCATGTCGTGATAAAGTAAAAACCGACGATGGGTGTGTTGGAGCTTTTCAATACTTCAAATGTTAC…
OBP	OBP_TdChr006.1	ATGAACAAATCATTCGCGGTGATTGTTGTTGTTGCCTGCCTCAACGCTGTTCTAGTCTGCTCTAAACCTCCTGACTGGATTGACGATGACATGATGAATATGGTCATGAGCGACAAGAAAAGGTGTATGGAAGAGCACGGAACAACGGAAGATTTGATTGACAAAGTCAATGAGGGACACCTGGTAAACGACCGAGCATTGACGTGTTACATGCACTGTCTTTTCGAAGCTTTCAGTATAGTCGATGAGGATGGAGACATCGAAACTGAACTCCTGATTGGTATCATGCCGGAGAGCTTGCAGGACGCTGCCCGACCAGTATTGGAAAAATGCACTACACTGAAGGGATCAGACGGTTGCGACATGATGTACCAAATTGCCAAATGTGTACAGGCTGAT…
OBP	OBP_TdChr001.1	ATGATCGCACGAATTTTCATTGTTTTTTGTGTTCTTCGAACTTCTGTGGTTATGAGTGTGGGTCGCCCCAGTTTCGTGTCCGACGAGATGATTGCCATTGCCGCTAGTGTCGTTGATGTCTGTAAAACGGAAATGGGCGTGGACCCTGCTGATATTGAAGCAGTTCGAAGTGGTGACTGGCCTGATAGTCAGCCTTTAAAGTGTTACATGTATTGCTTGTGGGAACGATTTGGATTAATAGACGATAACAGGGAACTGAGTTTAAATGGTATGCTGACTTTCTTCCAAAGGATGCCAGCATACAGGTCGGAAGTACAAAAAGCAATTCACGAGTGCAAAGCACTTGGACAATATTTTGGTTTCGCTGATAACTGTGAATATGCCTACATTTTTAATAGG…
OBP	OBP_TdChr001.2	ATGGCAGTCATTTTTACTATTTTGTGTGCAATTTTTACACTCTACGCTCATTCCACAGTGGAAGCCCATGGCCAACCTCCAGTAGAACTTCAAGATGAGGTTGCGAATATTCGAGCTGGATGTTTGAAAGAAAGTGGTCTTGCAGATGCAAGTTTAATAGAAAAAACATTAACAGGACATTTTGAAAATGACCACAGTTTGGGGTGTTATGCAAAATGCGTTTACGACATCTTTGGAGTAATTGGTAAAAATGGCGAGTTGCATTGGGACCAAATGTTGCAAGTTCTCCCACCATCTCTGAAGGCCGTTGGTGAACCAATCGTAGCAAAATGTCGTCAAACTGAAATCATTGGAGACGATGCTTGTTGGGTCGGATTAGAACTTACCAAATGTTTCTAC…
OBP	OBP_TdChr002.1	ATGCGACGTTGGATTTTCGTGTTGGCGCTTGCGCTGAGTGTTTTCTATGGAGAAGCTGGACTGAGTCCAGATCAGTTGGAGAAGATGGCGACTGGCTTTAGAAATACGTGTGTGGGAAAAACTGGTGCAGACGCAGAAACTGTTTTAAAAATGAGACAGGGCCAATTTCCCGATGATCCAAAATTAGCTTGTTACACGAGGTGTATCATCGGATTGGGTCGTGCGTTCAAAAATGGAAGGGTAGATAAAGATATGATGTTGAAGCAACTAAACATAATGGCGCCGGATGATAAACTAGAGAGAATGACTCAAACTGTTTACACATGCACTGCAATCGCTCCATTCGCGGATGAATGTGCCTATGTCTACGAGTACGTCAAATGTAATTACAATGCAGAT…
OBP	OBP_TdChr005.1	ATGAGGGCTTTTGTCACTTCTGCTTTCCTTCTTCTTTGCGTCGCTTTTGGGAGGGCTGATGATTTTGACCCCACCCAAGTGCCAAAAATGGTATTTGAATGTGTTTCGAATTCTGCAATGTTACGGGAAGCCATTGACGACTTCCAGTCTGGATCTCTTCGACAGAAGGCACCTAATTACATTGGATCTCTAACTGCGTGTGTCATGGAGAAAAGGGGATATATGGATGAAGCATCTGGCAAGCTTGCAGCAGATAAAATCGTTGCGAAAATCGCAGAAGTCGGAGAGTTATATAATAAAGAGAAGCTTACTGAATATGTTGAGTCGTGTGTTCAAGAAGCAAACGGTGAAGGAGACAAAAGCCAAGTAGCATTGAAATACATCGACTGTGCTTTGAAT…
OBP	OBP_TdChr006.3	ATGTTGCTTCGGAACTCCATTTACGCATTGGCTCTAATTTGCGCCTTCAACTGCGTAGATGCCATAAGCGAGGAAGCTGCGATAAAGATAGCAAATAACTTCAGGAATACTTGCATGCAAAAAACTGGTGTTGATTTAACAACGGCTACCCAAATCAGAGAAGGAACATTTCCTGATGATCAAATGGCAAAGTGTTACACCAAGTGCGTCATGTCCGCCGTAAGATCGTTCAGAGCAGGTAAAGTAGACTTTGATATGCTGAAGAAACAAGTCATAGCTATGGCACCAGTGGAACGACAAAAAGGCATGCTGCGAGCTATCGATGTCTGCACTGGTCCACCACTTGACGATCCCTGCGAAACGACTTATGAATACCTGAAATGTACGGCAAAAGAAGCA…
OBP	OBP_TdChr006.4	ATGAGGAACTTCGCAATTGTTTTTGGGCTCTGCATTATTTCCGCTGCATTTGTCAATGCTGGATACAAAAGGGCGTTGAGGAAGAAATGTGAAGATTGTGCAAGTGAAATGGGATACTCCAAAGAACAACTGGCAGAATTAAAGAAGAATTCAGATTCGAAGTATGGCTGCGTGGTAGCTTGCGTCTTGAAAAAGGAGACTATTATGGTTAACGGTGAAATAAATGAGGCTGTTGCTATTAAAAAGCTTAAAGAATTGCAGGGTAAAGGAGTTGATGAAGCGCAATTGAAAAAACTCGTCGACAAATGCCTGGAAAATGCAAACAAAGAAAGCGAGGAGTGTGCTAAAGCGCTTTCATTTGGAAACTGCGTACTTTCTGAGAAAAAACGAAGCAGTAGC…
OBP	OBP_TdChr006.5	ATGAGAAGCTTCGTAATCGTTTGTCTGTGCCTCATTGCCGCGGCATCTGTCAGTGCCAAAGGTGGCAAAGGTGGTGGTGGCAAAGGTGGTGGCAAACATGGAGATCACTTCAAGAAATTTGAAGAATGTGCTTCTGAATTGGGACACTCAAAAGAGGATATGAAAGAAATGTTCCATAACAAAGACCCGAAACTTGGCTGCGTAATTGCTTGTGTTATGAAGAAGGAAGGAATTATGGAAAATGATGAAATTAGTGGAGAAAAAGCTGCTGCTAAGATGAAGGAGAGGCATGGCAAGGGTAGGGGCGATGATGACCACATGGAAGAAAAAGCAGTTAGCTGTGCAAAAACCGCTAACAAAGAAAGTGATGACTGTGCCAAAGCACTTTCCTTCATGAAA…
OBP	OBP_TdChr006.6	ATGAAGAGCTTCGTAGTTGTTGGTTTGTGCATTATTGCCGCTGTATCTGTCAGCGCCGGTAAAGATGAAGAACATAAGAAAATGTTCGACGAGTGTGCCAAGGAATTGGGATACTCTCCAGATGACATGAAAGCAATGTTTGAAAAGAAAGACCCCAAAATCGGCTGTGTTATTGCATGCGTCATGAAGAAGGAAGGAATTATGGTCAATAACGAAATCAAAGAAGATGTTGCTCTTGCTAAGATGAAGGAAAAGGTTGGTGATAAAATGCCAGAATCCAAAATAAAGGAAAACATCCAGAAATGTACTGCTGCTGCCAACAAAGAAACCGAGGAATGTAACAAAGCTGGAGCATTCGTAAAATGCATCATGCCTCCCCCACCACCAAAGAATTAA
OBP	OBP_TdChr006.7	ATGAAGTTCGTAGTACTTGGAATTTGTCTTATATACATAAGCAACGGTTTTTTCGGAGCAGCGATGGAGCAAGATTATGAAGAACTTTATCTCCAATGCGCCGAAGAACTAGGATATGGAAAAGTTAGTGTCGAAACATTATACGAAAAAGGAGATAAATCTTTAGGATGCGCTACAATTTGCGTTATGAAGAAAACTGGTGAATGGATTAACGGTAAAATCAATAAACAGCACGTGTTGAAGGCAGTTGAAGAGGAGAAGGGTAATGCAATAGATAGCGGATCAATGTTAAGAATTGGTGAATGCGTCGATATCGCAAACAAAGAAGCTGACGACTGCAACAAAGGTCTAGAATTTGCATTATGTTTTGAAGAAAATTTCGACGATGAAGAATCAGAT…
OBP	OBP_TdChr006.8	ATGAAAATTGTTCTACTCTGTGGATTACTTTATTTAGGGGCTATCACTGTGAATTCATATTCACAAAATGCAATTAGGGAATTCTATAAAATTTGCGGTGTAGAAATGGGATATAGTGCAGAAACCGTAGGGAGCATGTTCAAACATTTTGATCCACAATTTGGCTGCGTAACCGTTTGCGTTATGAAAAAGATTGGCGACTGGAATAATGAGTCTCAGAACATAGATAAGGAGCATGTAATGAAACTCGTAAAGGCTAACAAAGCAATGGCAAACGAAAAAATAATGAGTGGTGTAGAAAATTGCATTGATCAGGGTAATCGACAACAAACTGAGTGTGCGAAGGGCCTGGAATATGTTCAGTGCGTTTGGAATATGACAAAGGAATATCGTCAGCAG…
OBP	OBP_TdChr006.9	ATGAAAATTGTTCTACTTTGTGGATTACTTTGTTTTGGGGCCATCACTGTGAATTCATATTCACAAATTGCAATTAGGGAATTCTATAAAATATGCGGTGTAGAAATGGGGTATAGCGCAGAAACCGTTGGGAGCATGTTCAAACATTTTGATCCACAATTTGGCTGCGTAACCGTTTGCGTTTTGAAAAAAATTGGCAGTTGGAATAATGAGGCTCAGAACATAGATAAGGAGCATGTATTGAAACTCGTAAAGTCTAACAAAGCATATATGGCAAACGAAAAAATAATGAGTGGTGTAGAGCATTGCATTGATCAGGGCAATCGACAACAAACTGAATGTGCGAAGGGTCTGGAATATATTCAATGCGTTTGGAATATGTCGAAAGAATATCGTCAG…
OBP	OBP_TdChr001.3	ATGTCGAAGTTTGCATTGGTACTGGGTTACTACGTGTTTCTTTTGTGGTTACATGAAATTTCGGGTCTAAAATGCCGAACCGGTAATCAGCAGACGGATGAGCAGTTCCAGAAGATCATGCAGGTCTGTCGAAGACGTTACTTAGGATACGGAAGGAACAACGGGGAATTTTCCAGAGAAAGCGACTCCGAAGAATCCGACGACTCTGGCGAAGACATGTTCGACAACAAATTCCTGTCTTCCGGTAGAAGTAGATATGGCTATGGTAATGACAACGGGTATGGCAGTGACATGGGATACGGAATGGATAACGGATATGGAAACGGATATGGTGGAGGCAGATATGGTGGAAATTCAGATAGATCATCATCCAGAGGTGGATCCAGACAATCACGTAAT…
OR	OR_TdChr001.1	ATGGGACATGCAAAACCTCCAATGGACATAACATATTTCGAGACATCACATTACCGAACTGAGTTTGAGAAAGCATCAAGAATATTCTTATGGTGCAAGAGATTGTTGTCACTAGTCGGACTTTGGCCAAGCAAGAATAGAGACGTATTATTCTGGACTCTTTTTATTTACTTCAGTTTTTACAAACTGTTAGACGGAATCACTCTGTTCATCGCTGCTGGGAAAAGTCTGCAGCATTTCATAACCAGTTTGGCATATAACGTTACTTATATACACATCTTTTTACGATTTCTGATTTTGAAAGTGTACAATAATTATTACGGCGCTTTATTTGATGAGGTTATCAACGATTATAATGAAGAAGTTTACAAGCTGCCGGAAGAAAAAAATTCTTTCTTG…
OR	OR_TdChr001.2	ATGTCCGTATCTAGAGTAAATGCAGCTAGTGTTTTCAAAGTCTTGAGACTTGGCGGAAAGTTAACATCGACTTGGCCTGCAGATCTCGGAGCGTCGAAAGTCGAAAATTTTATTTACGAAATAGCCTGGTTTCTCTCCTTTACGAATTTAAGTTGTTTACTCGGACCATTAATTTTAGGAGTTTACCAGTTTCGTCACGATGCGTCTACAATGACTAAAGCGCTGTCTGAGCTTACGGCTTTGTGCGAAATTTTTGTGAATCTTATACAATGTCGTCTTGAGAAACATAATTTTCAGGTCTATTCATCATCGGTTCCACGGATCTTCTGCATTACCGCTAAAATCATATTAAAGGAAATTGGCGATTTCGTGAAGAATGCGAAAGGTCAAGAAGAGATT…
OR	OR_TdChr002.1/Orco	ATGATGAAAATGAAACAGCATGGTCTTGTGGCGGACCTGATGCCTAACATCAGGCTCATGCAGTTTGCGGGCCACTTCATGTTTAATTATTACAATGATGGCATGAAGCTTATGCACAAAATCTACTGTGTGGCTCATGTTGCTTTGATCCTTACCCAATTTGGTTTCATGATTGCCAATCTAATCTCCGAGAGTGATGACGTAGACGATCTCACCGCAAACACCATCACCTTACTCTTTTTCTCTCACAGTTTGGTAAAAGTAATTTATTTCGCAGTACGAAGTAAATTATTTTATAGAACTTTGGCTGTTTGGAACAATCCGAATAGTCATCCTCTATTTGCTGAAAGTAATGCACGATACCAAGCTGTGGCGTTGACGAAAATGCGAAGACTTTTG…
OR	OR_TdChr002.2	ATGGATAATTACGATAAAGAACATTATAAATTAAATAAATTCCTTCTTGTATTCACTGGTTTATGGCCAGGTCAAAGTTCTGCGTGGAAATGGACAGCAAGATTCACGATAGGGCTGGTACTGTTGTCAATGATGTTACCATTGGTTATTAGAATCAAACAAGAATGGGGGAAAAACGTGGATGAAGTCATTGAAAATAGCGGATCGTTGGGTTACTGTCTTATTTGCACTATGAAATATCTGAGTACAATAGTTAACGAGAAAAAGCTTAAAATACTGTATGAAGCTATCGCTAAGGACTGGAAATCAACAACAGATATCAATGAGATTCAGGAGTTAGAGAAACACGAGGCTTATGGCAAACAGTTAACCATAGGATATACATTATACATGTACGGA…
OR	OR_TdChr002.5	ATGAAGCCAATTGTTAAAAATAGGATGGATTTTGTGGATGGTTATTATTTCCAACTCAATAAAAATTTGTTGGAAATTGTGGGACTGTGGCCTTACCAAAATTCCATACGTAAATGGCTGGCAAGATTCTTTTTCATGTCTATGATGTTTTCACTTGTTCCACTTGTAGTATTACACTTTATCGAAGCGATTAGAAATAAATCTATTGCTGCATCGTTTGAATGCTTAAGCAGTTTAGGATATTTTTTATCGTGTGTGATGAAACTTCTCTGTGCTGTCCTGAGCGAAAAACAGCAAAAATCTATTATTGAAGGAATGTGTGAAGACTGGAGAATTATAACTGATGAAGATGAAATGGAGGAATTAAAACGATATTCGATGACTGGAAAGCGAGTAACT…
OR	OR_TdChr002.6	ATGGGTTTAAATCGATTTGGCCTAAATTTTCTGGGAGTCTGGCCCGAATGCGACGTTAATCAGGCTGTAATTACGCACAATGCGCGCGTAGCTACAATTGTTCTTGTCATGACGTGCGGTTTAATAATGCCACAAACTTATGCGCTAATCCTTGTCATCCGTGAACTCCCTCTCGTCCTCGATAACCTGATCGTCTTAATGGCAATTATTTTGTCAGTTCTTAAAGTTGTTTTACTATGGCCAAGCGTACAAAGTTTAGTACCTCTGGTGAAAAGTATCGAAAACGATTGGTACAGACAAAAGAATCGAAAAGAACGAGAAATCATGCTAAGATTGGCTTATCGTGGAAGAGCCTTTACCATCGGCGGGTATATTTTTATGAGTTTAACTTTTGTTAGT…
OR	OR_TdChr002.9	ATGTTTAAGAATTTTCGATCAAAGTACCTGAATACTATTGAGTATTCTGTGCTTCCTTTTCCTATGACATTTTTTTGCATGGCTGGTGCATGGTGTCCAAGTAATTGGAGTGATAAATGGAAGATATTCGTTTTGTTGATTCATGAGAGAGACGTTGATCTGAACACAATATTTACATTAACAGCTCTTTGCAATGGAATGACTAAATTATTCACTGTATTATTGGATCGAAGATGGGTCATGGAGATTTTAAAAATGGCGTTTAATGAAAGATTATGCGAGCCACGCAATAAAGACGAGCTGCGAATTGTTCAGGACCATAACAAAAATATGGAAAATGTTCAAGTTGCGTACAGTTTGACGATAATTGTGGGATTATTGGTCAAGTTTTCTGTGTTC…
OR	OR_TdChr003.17	ATGTTCAGTATCCTCGAAAGAGGGCGGACGTTAGTTCTGACGAGATTTAGGAAAGATTCGCAACTGCAAAATCTGCGAAAAAGAAATCTGATAATTAATTCTGCATATAAAATTCATACGACATTACTCTCCACTATTTTAAACACAAGTGCTGTAATAAAGTATACAGTCATAATATTTCGAGAGAAGAAAATACGCAGTTTCATAGACTTGATTGAGCAAGACTGGAAAAGTGTGGATGATGAAGAGCACCGGCACATAATGCGAAAAAATGCTGATATAGGTCGAAAGTTAACACGTCTTTCCTGCTATAATTTTTATTGTGCTGGGCTTTCATTACGACTATTTAAGACATTATTGGCTCCAAGTATCGTAGGTCTTGCTGGAACAATACGACCT…
OR	OR_TdChr003.25	ATGGATTTATTCGATTCCAAAGATTATAAATTAAACAAATATTTATTCATATTTACTGGTATGTGGCCATATGGTAGCCGCGTCAGAAATATTATCATACAAGTTCTAACATTGTTGATGTTAGCAACTCATATAATACCTTTGATATGGAATTTAGTTCTGGAATGGGGCCACGACATCAATATAATTTTTGAAAATTTAACATATACCTTGTACATGATGGGAATATCGTCAAAATTTGGAAACCACATCTTTTACGAAAATACGCACAAGCATATGTACGCAAAAATGTCTAGAGATTGGAAATCAATAGTAAATGAAAAGGAGAAACGTATATTACGTAGTTTTTCTGATGTTGGGAAGCGACTAGGAATATTCTGCTCAATTTATAACTCGACT…
OR	OR_TdChr003.27	ATGGAATATCCTGTAAATGAGTATTTATCTATAAGACTTATTCGCACACTGATGACATTAATCGGGATGTGGCCAGCGAAAATCAAATGGGAAGAAAAACTTTCCAACATTTTACTTGTTTACGCAGTTTTTAACATGGCAGTGGCAGTTCTCGGAGAGACAGTCGATTTGTATTTCACATGGGGAGATCTTACCGCTTTTTCCTACGTAGCTCCGTTGGCATCGACAGTATACACAGAAATGGCAAAGCTCTTGGTATTTACAATAATGAGACGAGAGGTAATGTTACTCAATTCATTCACAGAGAATACTTTTTGGAAAGTTAAATATGACGACGTGGATCTACAAATATTACAAAAATGTGAGAAAAAATGTTTTGCAAGCGGAATGACATTCCTT…
OR	OR_TdChr003.2	ATGGACAGTGATCTCGCAAAATACCGATCTGGTTATCGTTTTGTAAAGACAACGATGAATATTATTGGCTTGTGGCCATCAAAACGCAGAAATGTATTCCTTCAAGGCCTATCCAACTGGACGATAATAATTTTGGGAACGGTGGCTAGTCTCGCTACTTTTAATTTTAGTATGCTGCACCGCTCGAATATACCTCTTCTCACAAGTTCAATGAGCTTCAATGTCACTTTCGTAACCATGACTTTGAAGGTTGCATGGATAATGACACAACGCAGTTATCTGCAAGATCTTACTGATACTCTCAACGCGTATTTCGAGGAGCACCTAAATGTTCCACAATACAGGGAATGTCTTCTAAAACGTGCATCCTTATTCCTGAGCCTTTTCAGCATATCGATG…
OR	OR_TdChr003.7	ATGGAGGAGCAGCTCAAAAGCTATCGTAAAATTGCTGGTCACATTAAGTTACTTTTGATCCTTGGAGGAGTGTGGCCAAAGTTGGAAGATGATACTATTTTGTATCGAATTTTGGGAATTGTGGCAGGGATCATATCTTTGCTTTCTGGGTGTAAAGTTTTGTATTTGTGCTTAAGTAATCTATCGGATATTTCGGTTTTTATAACTACTTTGGCACCGTTTATAAGCGCTTTTACCACTGTCATCAAGGTCTTCTGCTTTCTTGCCAATCGAAAATGCGCGATCAACTTAAGCCATTTACTAAAAAATAACTTTGAAGATGATCTGAAGATTCCACATTATCAGCCAATCCTATTATCAGAACTATCACTTCTCACTCGTCCTCTGTACGTCCTTGTA…
OR	OR_TdChr004.4	ATGATTTCGCAAGCTGAAGATGCGCTTGCCATACATAAAATCTATTTAAGTCCACTTGGTATCTGGCCAATGGACGCTGATGATAATTATAGAAAAATTCGCTTCCTCTTATCATCATGGCTACAGTTAAGTATAACAGGACAAGCCATGATCGAAATGGTTACATTTTCTGGAGATGTGTCTGAAAAAATGGATATTTACTTAATTTGGGTTTGCGGTATACTTGCATTTGCTCGACACAATCAAGTTTATGTCTACCGCCAGAAACTTAATAAAAGTATCGTTTCACTTATCAGCGATTGGTCAACCATCGACGATGTGGAGTTCGTAAAGATCATGCGCAACCATGCTTACATTAGCCACTTATTTAGCAAAGCTCTGGTTTCCATGGCTATGTTT…
OR	OR_TdChr005.6	TCACGCATGAATGTGAAAACGAACGACGCCCTTGATGTACACAAAAAATTCTTGGAAATTATTGGCATTTGGCCTTTACAAGAGAAGAGTTTCTTACGAAGAGTCTCTTTTCTTGGACAATGTCTAACGGAACTATATTTTTATCAAGGGGATATGTCCACAAAGGTCGACATCTACCTCACCGGTGCCTGTGTTATGGTATTCTCGTCACTTTCTGCTGGCACGTTATTTCTCATTAAAGCAGTAATAACGAATGTAATTCTGAAATTAAATTCATCCCCGGACGAAGAATTGACGATACAATTAATGGTCCCTATGTCCTTTTTGCGAAATGACGTATTGAACCAATATTACGGAGTTTTAATTGCTTTTCAATACATTCAAAGTATGTGTGTTTGT…
OR	OR_TdChr005.8	ATGACGAGTCTACTAATATATCATCAAGAATTTGTCGACATTATAAAAATGCAATCCAGCACAGAATTTAAACCGCGAAATTCCTCCGAAGAAATGATTTTCGAACGTATCAATAAAAGAATGAAGTCAGGTATATTTCTATATGCAATCTTCATGTATAATTGTAACATAATGACCGATTTACAATTATTATTCGGCGCTCTTCAAGGTAATCTTGTTGCCAGAACGTGGCAACCATACAGTATTCGGTCTCCGTATGTATTTTGGGGTACTTATTTCCATCACACCATTGGATGTGTCATAGCAACAGCTATTCAAATTGGAACCGATATGCTACTAATTAGCTTCATGTTGCTGATATGGGCTCAGCTAGAAATTTTGAAGAATCGAATCGCAAAC…
OR	OR_TdChr005.9	ATGTGGTGTGTCAGTTCTGGTCTTACACTGTCCATGCTGATGGATATTGTTTTCACAGCTAGAAAAATTGAGGAGATACTGGACAACTGCTTTATGTTCCTAACTATGCTCAATGGGTGTTGTAAAATGGTATATATACTACGTTTTCGAAAGGAAATTATTAAATTATGTTACACATTAGACGAGTATCCGTGCACTTCACGAAGCAGCAACGAACAACAAATCAAAGCATACTTTAACAGAATTGCCAGATATACAACGTTAATATATGGTTCGTTAGTGGAGACAACGGCGGTAATAATCGTAATTGTGTTAACTATACAATTCCTGAACGGCATTTTATACTTTAGAACATGGAGACCATACAGCGTCTCATCATCCGCAGCACTATTTTTTACA…
OR	OR_TdChr005.12	ATGATATATATGATAATAAAGTATGATGCTATCATTGATTTAAGAAATATGTTATTGAGCGACATGTTTCAAACGAGAAATTATGAAGAAGCAGAGATTATATCAAAATACGAGGATTTAGGAAGATGGAATACATTGAAATACGCACTTCTAACAGACGGATCTATCACTTTCTTGAGTGTAACATCATTCATGATGGAAGGTTTAAATGGACGTTTGATGTACAATGCATATTTTCCTTTCGACTATACTGCGAATTCTTTTATTTTTTGGATAATATATATCCATCAAGTTATTGGTCATGTAACAGCGGGTAACATAAGCATTGGAGCTGACAGTGTCGTATCAGGCTTTATGCTAAAAGCATGTGCACAAATTGACATCATGAAATATCGTCTT…
OR	OR_TdChr005.14	ATGACGTACTTGCTTATTCACCGTCATAAAATTCTTAATCTTCTGGACACATTGGTGAATGATATGTGCAGTCCTCGATGTTTTTCGGAACAAGAAATCAATGCAAGTTTTCATGAAAAATCCAGGTTCATTACAACAAATTACGGACTTTTGGTGCAATCATCCCTTGTTTTCATGGCACTGAGGCTTTTCGTAAACACGCTTAATGGAACTTTGCCTTTTAGAACATGGCAACCTTATACAATATCATCTCCAACAACGTATTGGTTAACATATCTTCATCATGTTACTTCAGAGTTTGAATGTGCAGCAATACATATCGGTGCTGATACGCTAATAACTAGTCTGATGATGCAAGTATGCGCACAATTAGAAATATTAAAGTATAGACTCTCCAAC…
OR	OR_TdChr005.17	ATGACATATCTCGTTATCCATCGGAATAAAATTCGCAACCTCTTGGAGATATTGGTGAGTGATAAATGCATCCCCCGAAGTTCTCAAGAAAAAGAAATCAACGACAACTTTTACATGAAATCCAGGTCCATTACTATAAATTACGGAATATTGGTACAGTCGACGGTGTCGATCATGGTATGCAAATTATTTATAAACGCGCTTCATGGAACATTGCCATTTAAAACATGGCAACCGTACAATTTATCGTCACCAATGGCGTACTGGTGGACCTACGTTCATCATCTAACTGCAAAGATTGAAAGTGCTGCTTTACATGTAAGTGTAGATACGCTGATAACTAGTCTGATGTTGCAAGTATGCGCACAATTGGAAATTCTAAAATATCGACTTTCCAAC…
OR	OR_TdChr005.18	ATGGGAAAAGAGATCGCATTGGCGAAAACTATGAACGTGCTTGCAGCGGATGCATTAGCAGTGCATAAAAGATGTTTGAGTCCGCTTGGTATTTGGCCCTTGGATGACGACAATATTTTCAAAAAAGCTCGGTTCTTGCTGGCAATTTGGCTACAGTTGAGTATTACTGCACTGGCAACATTCGAAGTCTATATATTTTCTGGAGACATATCAGAAAAAATGGATATCTACTTGATCTGGGTATGTGGCATTTTGGCTTCCGCAAGGCATATACAAATTTACATCCATCGTGATAAACTTGGTAAAAGTGTACAGTCGCTAATAAAAGATTGGGAAACGATTAAGGACGGCGAGTATTTAGAGATTATGCAAAGTCACGCAGATATTAGTAGAATATTT…
OR	OR_TdChr005.29	ATGGATGTACTGCCCAGCAATTTTCGCACCCTACTATTCTGTGGAATATGGAAGGACGACTTGGAAAAAGAACCCATAATCAGAATCGTTTATCGGCTCATCGTAATCACTATGCTATTCTACGTAACTATAGGCGAACTTGTTTCGTTACTATACCGTAACGATATTGGCGACATATCAGATCACCTGCTACTACCACTTTGTTATATAGCATTAATTTTCAAAATGTTTAACTTCTTGATACGCAGAAGTGATTTGATCAGACTGTTGGAAAAGTTCCGATCAAAGATGTGCCAACCTCAAACATTCGAAGAATTTCGAATTGTTTCCAAGTATTTCAGGATTGCTGCGGATATCCATAAATATTTCACGACTTTCGTGTTTGTTTGCTCCATAACA…
OR	OR_TdChr005.32	ATGTTGCGTATAATCACGATAATCTTGCTATCATACATGTCCATTACCGAAATTATTGAACTTTTCCGCATGGATGCAGAGGAGCTAATTCCAAACCTTCTAATAGCAATGTGCTTTCTTGCACTGATGATGAAATTGTTAAACTTTCTTTTGCGACGAAGTGATTTGATTAAGTTGTTGACAAGATTTCGATTGAACGCATGTAAACCAAAAGTTATGGCAGAAGCGGAAATTGTTAACAAATACGCGAGGAGTGCAGCACAACTTCACAAATATTTCATCATTCTTGCTTTTTTTGGCAGCGCGAGCGTGTCGCTAATACCGATTTTAAAGTATTTTAAAACGTTGGAAATTGAACTTCCTATTAAAGCTTATCAAGCATACGATACGTCCCACCCA…
OR	OR_TdChr005.34	ATGGATGTATTGCCGGGTAATTTTCGTTATTTGTACTACTTCGGGTTGTGGGAAGAACGTGTTGAAGATGAAACGATATTAAGAACTGTATATCGTATAATCATGATAATTTTAATTTTATACATGACCATCACCGAAGCCATCGAATTGTTTCGAATGAATACAGAAGATCTAGTTCCAAACCTAACAATAGCAATGTGTTTTGCTGGCTTAATGATTAAAATGATCAATTTTATCTTACGCCAGGGTGATTTGATTCAGCTGTTGACAAAGTTTCGGGCGAAAGTATGCCAACCTCAAATTGAAATGGAATCTAAAATTCTTAACAAATATGCAAAGACTGCTGCTCAACTTCACAAATATTTCATCATTTTTACTTTCGTGTGCTGTACAAGTGTG…
OR	OR_TdChr005.35	ATGGACGTTTTACCGTACACTTTTCGATCCCTCCACCGCTGGGGTGTCTGGAACGATGAGAGCGAAAACGATACGATATTAAAAATCACTTATCGAACAGCAGTCATCACGTTGGTATACTACGTTACCGGTATAGAATTCATCGAACTTTTAAATCCCAGCGATGTCAATGACCTATTTACGTCGTTGTATTTGACGCTGTGCTTTTTATCATTGTGTCTGAAATGGTTGAACTTCCTATTTAGCCAAAAGCAATTGTCGAAGTTACTAGAAAAATTTCGTTCGAAAGCTTGTCAACCCCAGACACTTGACGAAAAAGCAATTGTTGATAGATATTCCAACAAAGCAGGACAAATTCACAACTATTTGGTGAATTCCGCATTAGCAACAGCTTTGGTT…
OR	OR_TdChr005.37	ATGGATATTCTTCCTGTGCACTTTAGAGTTTTGTCCCTTTGTGGGGTTTGGCGTGATGATAAATCTAATGAATCGTTACTTAAAGTTATCTACAAAGTGTCGGTCGTAATATTAATTTACTATACTACAATTTTTCAAGTAGTAGCATTATGTAAATCAACTAACGTGAACGACTTTATAACTATTCTTTTTTTATGCCTAACTTACGTGGCGCTGTGCATAAAGTGGTTAAATTTAATCTTCCGTAGAAATGATATGTTAAAACTCCTAGATAAGTTCCAGAAAAAATGTTGTCAACCGAGAAGCGAAGAAGAACGTGCTATTTGGGAAAAGTATTCGACTTCGGCAGTTAATTGTTTTAATTATCTATTGTCCATCACGGCGCTTTGTGGTCTTTTT…
OR	OR_TdChr005.48	ATGACGAGGTATGGCTTTGCAAGTACAGATTTGCATATCCACACACCGTACGAAGGCACGCGTCTACTTATAATAATGGAAATTCTGCCAGAAAATTTTCGATCCTTGGTGTACCTTGGAATATGGCATGAAGAAAATCAGAGATTTTTTCTGCCTATGTGGTTATACCGTTTATTCGTCTTTCTCGTGTTAACTTACCTCACTGCCATTCAGGCAATTGAACTGTTAAGAACCAGCAACATAATTGACTCCACCGAATGTATTTTTTTAACCTTGACTTATGTTTCATTCTATGCAAAGTGGGTCAATATAACTGTCAGACGCAACAAATTCTTGGATCTGAGAAATCGGTTTCAAACGAGCATCTGTCAGCCTCGTTGTCCAGAGGAAATCGCAATT…
OR	OR_TdChr005.49	ATGACATTTCAGGCTGGAAGTCTAGTTGGTGCTCGCAATGTGGACACAGATGTATTTTTAGAATGTATTGCTCCAGTATTGATAAATTTGATGTGCTACAGCAAATATTTTAACTTTTTATACAAATTTAAAGAGATGAAAAAAATTTACGAAAAAATGGCGGATGATTGGGAAACATACGACTTTGGAGAGGAAGGCGTAATACTTCGGCAATATGCTCAATATGGAAAAAATTTGATTGTATTTTACGGAGTATGCATTTGTGCAGCAATGGCTCCATACATGGTACCTCCAGCATTTCCGTTTATACGTGGACTTTTAAATCCTAACGGTACTAATCAACGACCGTTGATGTTTCGTGTCGACTGCATCTATGATGATACAAAGTACGATTACATC…
OR	OR_TdChr005.50	ATGGACCAAGTAGAAACCGAATACGATAAATTGATATGGCCAGTGATGGCAGCCGGACGAGTGATGGCCTGTTGGCCCTTATCCAAAACCAGTTCCAAGACAGAAATATATTTTAGAAAAATTCACTTACTAATTGCATTTGTGACGACTATCCTAATGGTGGCTACCACAACAGCAGATATTTTTCATCAATGGAACATCAGCATAGAAGATGCAACGGAATGTGTTTTGGTTTCAACATCAGCATGGCTGTCATTGGCACGTATGATAACGTTTTCGATGCATCAAGAAGATATGCTATATATTGTTGAAAGTATAAAATACGATTGGATACATTCTAGTAAAGAGGAAAGACGACTGCTTCGAGAAAATTGCTTGGAATTTTTCAAATTAGCAAAA…
OR	OR_TdChr005.63	ATGGAACATGCTGAATATGCAGTTGGCATCAGCCGATGGATTCTGAGAGTCGTGGGAGTATGGCCAGAATTTAATTGTACGAAAACACGCATCGTGTTATCAAAATGTATCTTTACCTCTTCCATTATTTGCATCGTCATTTTCATTGGTATACCCCAAGGGCTAAAACTTTTTATGGTGGGTACTGATCTCGATGCAATATCCGACATCCTTATCACAGGAGAGATTCCAGTAGTCGTAGCCATTCTGAAAATGTCTATTATTCGGTACAAATCTGGAGTCGTAGAAAGTCTACTACGGCAGATTTACAAAGACTGGCAAACTCCTCGAGACGCTAATGAACATGCAATTATGCTGCGAAGTGCAAAAAAAGGGAGGCAAATTGCTGCAACTTGTATC…
OR	OR_TdChr005.65	ATGACAACGACACCGTTGTCCGCCTCAAAAGAGGAAATTCCGTCATTCCACGATTCTTTGAAAGTCGTCAAAAGAGCAATGGAATTATACGGAGTATGGCCAGAGGAAAACGAGAAAAATTTTCTATATTACTGGAAAATATTTTCTATTATAGCTCAATACCTTCTGAGTCTTGGTTTTTTATTTGCACAATGGAGCGATCTTTACATCTTTTGGGGCGACATCGACGCAATGACTGATAATATTTCCAACAACATTATTACCATCAATGGCGTAGTTAAATTAACATATATTCTTCTTAAACGCAAATCTCTCCAGGAAGTTATTCACATGATGAGAGTAAAATGGGACGAAATTACAAAACATGCAATTGCGGAGCAACGAGAGTTGTTGCTAGAA…
OR	OR_TdChr005.4	ATGACTGACGTTCTACAGAAATATTATCGAGTACTTCAGATCTCCTCATCGGTTGGCGGCATTTGGCCGCGGCAGAGGTCCATCTTGCGAGGATTTTTGCAAATGATTACGTGTGGAGTTTTAGTATTTAATAGTAGCATTCAGGCTTACGTGCTAAAGGGAAAATGGGGTAATATAGATGCTGCAATTCAACCATGCCTCGAACTTAGTTATTCCGTCACATGTTTGATTAAATTCTTGACTTTACAATCAAACATGAAATTAATTACGCAGATGATCGATACTGTCGAAGACAATTGGAAGGTAATAATCGATAAAGAAGAAATTGAAATATTAACTGGATATGAAAACTTCGGATCAAAAATGTGTTTTTATAGCGCTGTTTACATAATGGTCAAT…
OR	OR_TdChr006.23	ATGACTAATAAAATTTTCATCACTCTGGGGTTGCGCCGGCGATGTAAGGATCGAGGAGTGGGAGAGTCAATCCCAGCAGTCTGCAATGTCTTTCCAGATGAACAAGGTGAAGCAAATAGTGGAGGCAAAATTTCGTATTCATTAAAATTAATTCGCATCGAGATGATGAACGACCAGATTTCACAAAAGAATATACGGGTGGAGGATGTTCTACCCGAGGCCTTCTTCCTGTACAAAATTGCGGGATTTTGGTGTCCACTGCACTGGGGTTCAAAAATGACAGTTTCGTACAATATTTTTATGACTTTTAACTTATTATTGTTACTTGTTAATTCGGTTTTAGAAGTCCTATACGTAGTGTTCAACACGACGAACGTCAATGAGGCTCTCCTGGATGAC…
OR	OR_TdChr006.35	ATGAAAGGTTATAAGGATCCAGATAATGAAGGTTTGAACTGGGCTATAGGCTTCAATCGCTTTGGTTTACGTTTATTTGGTATCTGGCCCGGAAAAAGTCTTGATAATGGATCTAACATAGCATATTTGACAGTTCCTATGATGTTAATTGTTACTACGATTACTTTATTTTTGCCACAAATGTACGCTTTACTTCATGTCATTAATGAGTTACCGCTGGTTGTGGATAATCTATTGACGAGCATAGCAATTATTATTAATTCCATTAAACTATTCGTATTCTGGCAAAAACGATATGGTTTGACACCGGTTGTAACATCTTTGACTGATGACTGGTTAAAGCATCGAGCTGACTGGGAACGTCAAATCATGTTGAAAATGGCAGGCCTTGGAAGACAC…
OR	OR_TdChr006.37	ATGTCTTTCAATGAACACTTTTGCATACCGAAGAGTGAAGCAGAGCACAAAATTATTAATCAAATAACTACAATACGCTGGACTGTTCATACCATATACTTCACAACTTTATTTTTGTCCTCAATAACGAAAGTTGTTGCGCCTTATTTCCGACCTACGACGGAAGAAGAACTGATGATCGACAATTTTCTTAATCTACCAATGCCCGCTTGGTATCCTTATTACGTATTAAAAAATCCTAAAACGTTCGCATTCACATATGCCCAGCAATTATTCGCTGCGTTTTCTTCAGTGACGATACACATTGCAGGAGATCTTTTAATGTCTGGAATTATGTTGCAAGTATGTCTTCAATGTCGAATATTGAAACACAGATTACTACATAATATGACTCACTTG…
OR	OR_TdChr006.38	ATGATTGAAACTAAGTGTCTAAGTGGTGAACTTGGAAAAGAAGATTTTGAATGGGCCGTCGGATGGAATCGTTCGTGCTTTACAATGCTTGGCGTATGGCCTGAATATAGGCCAAATTTTCGACAAACAATACAAGCACCTTTACTCATACTTTTTCTAACGATATCCCTGTTATTACCAGAATTTTGGGCACTGATCCTGGTCATCAATCAACTATCGCTCGTCCTGGAAAATTTGTTCGTCGTTTGCGCCGTTTCCACAATCAAGCTGGTTATATACTGGCAAAGCAAACAAAAGTTTATAGATATCATTGAAATCATCATGAGCGACTGGTGCAGAGATAAATTCGATTGGGAACGTGACATTATGTTAAAAATGGCAAGACGAGGACGGATCATT…
OR	OR_TdChr006.45	ATGACTGTAAAAAACGAGAAGAAGCAAGTTGCAGATTACGAATGGGCGATTAAACTAAATCGTATAAATCTGTTCATTTTTGGTATTTGGCCTGAACCTGACACTTACAAATGTCTCCCAAGTTTCGTATTCTTGATAGCAACATTGTTTATGATGGCCGTGGGTTTTTTATTACCAGAATTGTATGCATTACTACTAGTATGGAAGAACCTACCACTATTGTTAGATAATATTTCGGTTCTGGTGGCTGTAACAGTATCAGTGATCAAAATCGTTTTGTTCTGGATCAATAAAAAACAGTTAAGGGCGATTTTACGCACAATCAAATCTGACTGGTCCAAAGAGAAAGAAGATTGGGAAGAACACATCATGATACAACTAGGAAGACAAGGACGGTCT…
OR	OR_TdChr006.46	ATGGAAACCCCGTACAACATTGATTACAATTGTTACGATTGGGCGATTAGACTGAATAGATTGTCTCTAAGTTTATTGGGTGTTTGGCCTGACCATAGCAGTAATAGAAATGTTCTCCGAAGTTATACATTTTTATTGACAATGACAATTTGTCTAGGACTTTTAATGCCAGGATTATATGCATTATATCTAGTGCGAAATTTAAGGTCACTTGTAGAATCTTTCGAGTCTGATTGGTTAAAACCGAAGGAGGATTGGAAAAGACGTATTATGATACAGGAAGGAAAGCAAGGACGTTCTTTGACTTTGTACGGAATTATCATTATGCTACTATCGTTAGGTACTATTACAATCGGTTCTTTTTTTGGAATTACCGTACGCGTGATAAACAACATCACC…
OR	OR_TdChr006.68	ATGGCTGCTAATGGGCCGTTATACAGTTCAGATTACGAATGGGCTTTGAAATTTAGTCGAGTATGGTTGGACTGGCTTGGTGTCTGGCCTCGTTGGAAAAGTAACGAAGTGCTTCAGTTCATGCAAATGTTTTGCAAAGCTATGTTTGTAGTATTTTTTTCTATATATCCACAAATGTACTCGCTATACCTAACCAGTGACAATATGGCGCTAATGACACAAAATATGCTTTCAAGCGTTGAAGCATGTTTGTGCGTGATGAAGCTTTTTATTTTTTGGTTCAATAAAGGAGCACTTGAAACAATTTTAAACTTCATCGCAACGGACTGGTGTAAATTAAGAGAGGCTTGGGAACGAGACATTATGGTGAAAATGGCCAGACGAGGAAGGTTGCTGACA…
OR	OR_TdChr006.85	ATGGAGGTCTGTAACGAAATTGGCATTCGAGATTTTGATCGGGCTTTTGGGCTCAATCGATTGGTTTTACACAAACTGGGTGTTTGGCCAGAAACCACTAAGATAGAACAAAAAGATGAATATAAATTTGTACGTATAGCATTGGCAGTAATAACTGTATTAATAGGACTTTTAATGCCCTTAACAATGGCCCTAATTCGTGTTCGACACGAACTTTCCTTAGTAGTCGACAATTTATTAACAAGTATTCCTACAGTAACGTCCATGACTAAACTCTTCCTGTTATGGCGACATAAAACAGAACTGACTCCAGTCTTGTCATCTATTGTTTCGGATTGGCTAACATGGCGGATCGACTCTGAACGAGAAATTATGTTAAAAATGGCCAATCGGGGACGA…
OR	OR_TdChr006.92	ATGGATTTACACCAAAAACGCGGGTTTCAAGATTTAGAATGGGCGATCGGTTTGAATCGACTAAGTTTAGACGTTTTAGGACTATGGCCAATGTCAAATACTCTTGTCATCAAGAATGTACGGACACCGTTAGTTATCTTAACGATTCTTATTACAATGGTCTTACCTCAAACTCTGTCCATGATCAGAGTCATCAATGAATTACAGCTTATTGTGGACAATCTAATTACGTATTGTCCATCTTTTGTTGTGGTATTGAAGCTATACATATTATGGCGAGGACAGGAGGCATTAGCACCAGTCGTAAAATCGATAGCTAACGATTGGATAATGAAAAGACCGGATTGGGAATACCTTATTATGAGAAAAGAAGCGCATCGAGCTCGAATATTCACGATA…
OR	OR_TdChr006.6	ATGATTGAGGAAATCAGGAGTCAGTATCTGACGGCATACGAATTTCAAACGTATCCATTGCCGTTCTATCTATTTACTGCTTTGGGACTTTGGTGTCCATCCGATTGGAGTCCAGATGCTAAAAGGAAATATTACATGTACACAATATTGCAGTATTCCGTTGGAGGATTATTTTTATTCCAATCACTGGTGTATATAGGTACAACTATCTTCAAATACCATCATGTTGAAACGAACCCTGCTTTTGGTGCAATCGCAATCATCTTTGGATTTGTTAGAGTATCAACCTACATTTTTGATCAAACATGGGTATTAGAAATCCTGAAACTGGCTTTTAACGAGCGATTTATGAAGCCACGAAATGAAGAAGAAACCGAAATTATAAAAAGCTTTTCTACA…
OR	OR_TdChr006.8	ATGAAAACTCTGAACGAAAGAATGTTCGAAGTAGACTATCTTTGCGAAATGATGCTTATTGTAGGGCTTTATACACGACACGTGCTTCTTTACCGTCGAAGAAAGGAAATGAAAAATATTCTGAATCGTTGCGAGGAACTTTGGAAAGGTCTGCCAGAACCAGAAAAGCGAACTGTCTGGCAATATGTTCGAAAGGCACATTACATAGTTTACGGGACTTTAGCTATTTATATAATTGCAAATATTTTATATGTCGTTGGAAGTCAATTTACACCTCCTCCAGTAGACTTAGGTAACGAGACGATTATACGAGGATTGCCAGTCAAATTTTACTTCGACGAACCTCTACCAACGCCTTGGTATGAAATAACGTTTGTAGCGCAAGTTTTTATTATATAC…
OR	OR_TdChr006.9	ATGATTGAGGAGGATTTGACTTTTGAGAATATTACAGCTATCCACGTAATGATGTTGAGATTGACTGCTATTGTACCCTTTAGCGGTGGGTTTCTTAGTAGGCTTGCCACTCGTACATTACTGGTCTTCAACTGCATAAGCGGTGGAATAATTTTGACAGTTTTTATGAACTACGGCTACGTTAAGTTTCGCCAAGGAATTTACGAAATCGATTTCATATGTGAAACTACAATCGCGTTCGGGTTATATATGCGATATTTCCTGCTGTATCGTAAACGGGACCAAGTGGTGAAAACGCTTCTTATTTGTAAAAGTTTATGGGCACATTTGAACGACTCGGAAAAGCACACAGTTCGATATTTTGCACAAAAAATGAATTATTTCTATTGCTTTTTTATG…
OR	OR_TdChr006.12	ATGGAAATAGTCACTTTTGAAAGCATCACTCGGATCCACATAAGTCTTTTAAAGTTTATTGGTGTTTTACCATTCGATGGAAGAACCTATTCGTTTCTCGGCTCAAAAATTCTTGCAGTTTATCATCACACTTGCATAATGATTCAATCTACAATGTTTACGTGGTATGCGATTAAAAATGCACAACGTGGTTTATTCGAAATTGGCAACGTTTCCGAAGTAATAGCCATCAATGGTGCGTTGATGCGGTATGTATATCTTTTTCGGCACCGTATTCGATTTTTTGCAATGGTGAAATTTTGCGAAGGAATATGGGATGGTCTGGACGGGTCGGAAAAATTTCACGTTTCATATTTTGCAAAAAAAAGCAGCATTTTGTGCTGGCTGTACATGATAATT…
OR	OR_TdChr006.16	TGCAAGGCAGAGTTGGAAGCCAATGCCAAGATCCACAAATGGAACAGGGTGCTGCTGCTGCCTTTGGGCCTGTGGCCTGCCGAACAAAATGACTGGGTGTATGGGTTTCATCTGCTTAATTACTTATATCATATGCTTCTTCAGTATATCAATTTATTCCTCTCGATGAGTAATCTCGCTTTGCTTATTCGAAATTTGACGGAAACTCTTCCTTTTACACAAATTTTAACAATGTTCACGGTTTTACGGATCAATAATCGACGACTTGGTCAACTCATCAAGGAAGCTATGAACGAGTTAAATGTACATCTTTATGAAAGTGAGGAAGAAATTAAAATAATCTCCAGTTTTACAAAACATTCGAAAGGTGTTTATGTGGCGGTATGCGCATCTTCATTC…
OR	OR_TdChr006.17	ATGACGATTGTCGAATACGAATCATTTGAACACGTGGCTTTCCTCCACATCCTAACGCTAAAACTAGTTTCCGTCCTACCCTTCAACGGTCGAAGCATCAATTTCGTAGGTTCTTACTTATTACTAGTTTTCAATAGTTTATGCGGCATCATTATTATTTCAATATTTGCCCATCACGGATGGGTACAATTTCGGAAAGGAATATTCGAACTCGATTTTATCTGCGAAACGAATGTTGCGACGGGATTGTATATTCGCTACGCCCTTCTGTACTCTAAGAAAGAAAAGGTTCAAAAAGTAGTTGATCGTTGTAAAGAACTATGGAACCGGTTAAATTTCACGGAGAAACAATTTCTTGGAATGTATGTAAAGAAGATGGACAGCATTTATTTCTTATTT…
OR	OR_TdChr006.19	ATGATTTTGGAAATGGAAGAAACCAACCAGTTTTATGTGCGAATTCGTCGGATTCATTTCGCGGTATTACGATTAGTCGGCCTGTTGAAAACCGAGAAAGAAGACTTCAATGTTTTTAAATTTTTACTACGAATTTGGGTGAATTTTGCTTTCACCGCCATCAGCAGCGCTTACATAATGGCCTTTATTTTGGACTTGGCAAACAAAAGATTCAACCCGGATATTACCTCGGAATTGGTATCGTTCGTGGGATTTCACATGCGTTACTTTCTTGTGCTACACCAAAGAACAAAACTGGCGGATATGTTGAAATTTTGCAACGACTTGTGGAAAAGGGTGTCAATCGAGGAAAAAGCACACGTTCGATTGTTCATCAGAAAAATCAGTTTGTTAACTTTT…
OR	OR_TdChr006.21	ATGAATTCGGAACTCGACGATACGATTTACGTTCAGAGAAAATGTTTAAGCACAATCGGTATCTGGCCACTGGATAAGAAAGATACCTACAAACAATTTAGATTTGCCTTGTCAACATGGTTACAGTACAGTCTGACAATTCAAGCCATGTTTGAAATGTATACATCTTCTGGAGGAATGGCCGAAAAGATGGACATGTATTTAGTTTGGGTCTGCGCTATTCTAGCTTGTGCCAGACATACTCAAATTCACGTTCACCGCGACAGATTTAGAGAAGGTCTTCATGCTGTTATTAGAGATTGGGCAACAATTAAAGAAGAGGAATTTTTGAAGATCATGCAAGGCCATGCGCACATCAGCAAGTGGTTCAGCAAAGCTTTGACTGCGATCACTTTTTTT…
OR	OR_TdChr006.3	ATGGACATTCTATCGAATCATTTTCAAACTTTGTTCAAGCTTGGAATTTGGCATGAAGATAATGAAAAATTCTCCCTTTCCATGTGGATGTATAAGTTGTTCATGTTTTTTCTATTGACATACCTCACTACAATCGAGATGACGAGGTCCAGCACTATCACCAACTCCACTGAATGTACATTTCTGACAATGTCTTTTTGTTCGTTCTACGTAAAATGGGTCAACATAACCTTCAGGCGTAAGCAACTTTTGAATCTGCGAAATAGATTTTGCACAAATGCTTGTGAACCTCTGTGTGCCCAAGAGAAGCAGATTTTAGAAAAGACCGCGCAGCGTGCTGCTTAGTATTATTGGTTTGGTATGCTATTAGGGGTTTCTTGTGGAGTCAGTCTTATGTTC…
OR	OR_TdChr006.5	TACCTTGGAATATGGCATGAAGAGAATGAGAGATTTTTTCTGCCTATGTGGTTATACCGTTTTTTCGTCTTTCTCATATTAACTTACCTTACTGCCATTCAGGCAATTGAACTGTTAAGAACCAGCAACGTAACTGAGTCTACCGAATGCATTTTTTTGACTCTGACTTATGTTGCATTCTATGCAAAGTGGGTCAATATGACTCAGACCTAACAAATTCTTGGATCTGAGAAATCGGTTTGAAACATCGATAACATATATTGTTACTAACTCGATGATATAGGTTTTGAAGACGCTGAATCAGAATTGAAGGATTGTTCATTCTTACGCAGTCATCTTGAGGTCAAGTCGAGGTCATTTCAAGATGAAACTGAGAGCAAATCTTGTAGTGTATTCAGG…
OR	OR_TdChr006.41	GATTTCGAATGGGCGATTGGACTGAACCGTACGTGCTTCGAAATTCTCGGTGTTTGGCCGAAATATAGACCAACTTTTCGTCAAACAATACACGCACCATTTCTGATACTTTTCATATCGATATGTCTGTTAATACCTGAATTGTGGGCACTGATTCTGGTCATCGATCATCTTCCACTAATCTTTGATAATTTATTCTTCGCGTGCGCATTTTCTACACTCAAGCTCGTTATATATTGGCAAAGCAAAGAAAAGTTTGCAGACATCATAGTGATCATCACACGCGACTGGCACAGAGGCAAATTCGATTGGGAGCGCGACATCATGTTAAGAGTAGCAAAACGAGGACGACTGGTCACAATAAGTAGCTTTTTCGTTTTGCTTTTTATCTCCGTTGGA…
OR	OR_TdChr006.75	GACTTCAGAAGAGCCATCGGAGTAAATCGACATTGTCTGGAAATAATAGGAGCATGGCCTAAAGACCGAAACAATCCGTTTAAACTTCATCAGTTTCTACAAGTAACTTTAGAATGTATTCTTCTGGGCCTATGCGCAGTTTGGCCTTACTTGCATACCTCGATATTTTTTCATAAAGATATGAAAATTGGATTTCAGAATATTTTCACATGCATTCAATTCTCCGCTAGCGCATTCAAGCTATTAGTTTTATGGATAAACATAAATGTTTTACAGGTAATTTTAGATTCAATAGTATTAGACTGGTACACATTCAACATCACATGGCAACGAGACATTATGCTGAAAGTTGCTAATCGGGGACGATGGATCACCAATAGTTGTTTAACAATTTCTTTC…
OR	OR_TdChr004.9	TCGACTTACTATTGGCCGACTTTCTTTGAACAAACATGCTCGGTTTATTTTTTGTATACGTTGATCTTGAGTACGGATATTCTGCTTACAGCAATTATGTTACAAATTAGATTGCAACTGAAATTGATAAAACATAGATTGATTCAGTACAAGGGAATTACGGCTAGCAATTATAAAGAGCCCCCCCCCCCCAGCGTGATTCTACAGCAGGAGCGACGTATGATCAGGGAATTAGTCAATGATCTTTGATTCGTTTACAATTTTTCAGAAGACATTAATAACGATTTCTTTGGATGGATACTTTCATTGTTTCTTGTAGGAACTCCGAATCTTTGTATCAACGCTTATCTCACGGTGTTTTCCAAAACAATTATAGAAGCTTTTGTAGCGTTCGTTCTT…
OR	OR_TdChr006.7	ATGATTGAGGAAATCAGGAGTCAGTATCTGACGGCATACGAATTTCAAACGTATCCATTGCCGTTCTATCTATTTACTGCTTTGGGACTTTGGTGTCCATCCGATTGGAGTCCAGATGCTAAAAGGAAATATTACATGTACACAATATTGCAGTATTCCGTTGGAGGATTATTTTTATTCCAATCACTGGTGTATATAGGTACAACTATCTTCAAATACCATCATGTTGAAACGAACCCTGCTTTTGGTGCAATCGCAATCATCTTTGGATTTGTTAGAGTATCAACCTACATTTTTGATCAAACATGGGTATTAGAAATCCTGAAACTGGCTTTTAACGAGCGATTTATGAAGCCACGAAATGAAGAAGAAACCGAAATTATAAAAAGCTTTTCTACA…
OR	OR_TdChr006.13	ATGAAGGCAAACATGGAAGAAATGAAATTGGTGACTTTTGAAAGTATTTCACGAATTCATATAACTCTGCTGAAAATGATTGGTATCTTACCATTTGAAGGGCGAACATATTCCTTTTTAGGTTCGAAAATTCTGGCTATTTATCATCATACATGCATAATGATTCATTCCACGATGTTTACTTGGTATGCCCTGAAAAATGCACGACATGGTTTATTCGAAATTGGCAACATTTCCGAAGTAATAGCCATCAATGGAGCTTTAATGAGGTATATGTACCTTTTTCGATACCGTTTTCAATTTTTGGACATGGTAAAATTCTGTGAAGATATTTGGAATGGTCTGGAGCTTTCGGAAAAATTTCATGTTTCATATTTTGCAAAGAAAAGCAGTCTGTTG…
OR	OR_TdChr006.14	ATGGAAACGGTTCAAATGATGTCCTTCGAAAGTGTCACTCGTATTCACCTAATACTTTTAAAGCTCACAGCTATTCTACCATTTGAAGATCGAACATATTCGTTTTACGGATCTAAAACACTTCTGGTTTTAAATTACACTTGTCTAATGATTCATCTAACAATGTTTTCTTGTTATTCTATAAGAAGTTTATATCGTGGATATTTCGATGTTGGTAACGCTGCGGAAATAATAGCTCTCATTGGTGTCATCTGGCGGTTCGTATATCTTCATCGACATCGTTTTCAATTTCTAACACTTGTCAAATCGTTCGAAGACATCTGGTACCATTTAGAACTTTCAGAAAAAATCCACGTTTCGCACTTCACAAAGAAGAGTGTACGCATAAGTTGGATTTAT…
OR	OR_TdChr006.18	ATGAAACACTTGAGAGAACCGACATTCACGGATGTAACATTCGTCCACAAAACGATTTTAAAGTATTTAGCAGTAGTCCCTTTGGATGGATATTCGCTAAAATATATGGGAACACAGTTGCTAGTTGCATTTCAGATCATGTGTATTGCAATCTTTTTGATCTGTTTTGTAGGTTACGGCCTTGGACGATATCGTGAAGGAATTATCGAAGCAGACTATATTTGCGAAAGCGTTTTGTTTGCTGGAGTTTACATAAGGTTAACCATACTTATTTTGCGACGATCTCAATTCATACAGACAATGGAGCTGTGCGAAGAATTATGGTTGGACATGGGCGTGTGTGAAAAACGCGTAATCCAAAAATTTGTCAGAATGATGCATTGGGTCGTTTACTTTTTG…
OR	OR_TdChr005.5	ATGTTATTTGAAAAGAGCCGAGAACATTGTCTCTTACCTTTTCCCTTCTTTATGCTGACGTTTTCTGGAGCATGGTGTCCGCCTTACTTCGGTCCATTGAAAAGAGGACTGTACTACGCATATTCTGTACTAGTATTTGTTATGCTAACAGTATTCATTGCAGAAGTCTTTGTCTACCTTGTAGAAATCACAATGATTGGAAGATTCGAACCATGGCCTGTTTTCGTATTAACCACTCTAATTAATTGCGTTTACAAAATGCTTAGCTCCCTTCGTCGAGATTGGATCATGTACATTCTTGATTTGGGCTTTAAAGATCAATGGCGAATTCCCCGAGATCCTACAGAAGAACGGATTATGTATCATTTTAGAGGAACGGCAAGGAAATTACATGTAATA…
OR	OR_TdChr005.46	ATGGACATTCTACCGGTTCATTTTCAAACTTTGTTCAAACTTGGAATTTGGCATGAGGATAATGAAAAATTCTCCCTTTCCATGTGGATGTATAGATTGTTCATGTTTTTTCTGTTGACATACCTCACTGTCACACAAACAATCGAGATGACGAGGTCCAGCACTATTACCGACTCCACGGAATGTACATTTCTGACAATGTCTTTTTGTTCGTTCTACGCAAAATGGGTCAACATAACCTTCAGGCGTAAGCAACTTTTGAATCTCCGAAATAGATTTTGCACAAATGCTTGTCAACCTCGGTGTGCCCAAGAAAAGCAGATTTTGGAAAATACCGCGCACCGAGCTGCATGGTATTATTGGTTTGGTATGCTATTAGGGGTTTCTTGTGGAGTCAGT…
OR	OR_TdChr005.47	ATGGACATCCTGCCGGAAAATTTTCGAACTTTGGTTTATCTTGGCATTTGGAGAGAAGAAGATGAAACATTTTCTGTTTTCACGTGGATGTACAGGATTTACGTATTTATCTTATTGACGTATCTCACTATCATGCAAGTGATTGAGATGTTTAGGTCTAACAACGTTTCCGACACTGCCGAACGTATCTTTTTGACTCTATCCTTTTTTACGTTCTACACAAAATGGATGAATGTTACACTCAGACGCAAACAAATTTTGAATCTTAGAAAGCGGTTTCGGGCCGATATCTGTCAACCTCGTGGTTTAGAGGAAAATGCTATTATGGAAAAGGCCGCTAACAATGCAGTCTGGTATCACTTGTTTTATTTGAGGCTGGCAATAATTTGTGGAATCAGT…
OR	OR_TdChr005.54	ATGAATACTTATATCTCCAGCAGGCTCAGAAAAGCTGACATAGCATCAAATTACGATGGCATTTACAGAGGGTTTTATGAAGGTGTCGTAAATTTTGATACCGTGATAGCAGCACCCAGAGTAGGTCTAGGATTAGTGGGTATCTGGCCAAGTCCAGATGCCACCACCAGTACCGAAGATTGGATAGCGCTTCTGAGGTTCTCGATATCACTTTTTATAGGCGTCTTTTTTATCAACGCTCCTCAAACGATACAGTTGGGTTTCGTCTGGGGTGATTTTGATCGTATGACGAACATCATTTCCATAGCAAATCTTCCAATAGGCATTGCATTAATAAAGATGATCGTTTTACGAGCTAATAAAAATGCTTTGAAATCGCTGGTAAGGACGATGCGTACC…
OR	OR_TdChr005.55	ATGCGTTCCGATTGGCAAATGCTAAACAGCAAGCACGAGCTGGAGAACATGATTCGAAATGCAATAACCACAAGAAAGTTGAGTTTCATGTCCATAACTTTCGGAACATCCACGGCGCTGATTTTTGTAGGGCGCCAATTCATTCAAGAGTTGAAAAGGCCGGACAGCCCGATGAATGCAGAATTAATTTCTGACGTGGACTGGTTCCTGCATTGGGGTGGACTTTGCGTTATGTCATACTCAGCAATTGACAGTTCCTTCTCTGCGTTGATTCCGCATCTATGTGCTCAGCTAACAAATTTGCGATTCAGACTCCAACAAATAACTAGTCGGGATGCAGAATCGATATACGCAGAGACTTTTCAACGGAGGATAGTCGACATCGTCAAAAGACATGAA…
OR	OR_TdChr003.23	ATGGACGATAAAGAAATATCGAAAAAAGAAATCACTTTTGAAAATACTGAGTACAAAGTAGATACTCACAATGTTGTCAAATTCGCTAAATTACTACTTACACCTGTTGGAATTTGGCCTTGTTTGGACAAATTCATTTTTTCATATAAAATAGGATTTACTTTCTATGTTTCTATTATATTCAGTCTAATGTGCTTTCTTCTTATACCACATTTTATCCATACATTCCAATATAAAGGAGACCTAGGGGAATTGATGAATATAATGGCAGCTCAGATATACAGCAGTTTTGGAGTACTGAAATTTTGGATGTTTGTGATAGACAAGCAGAAAATTCGAACGTGCGTGGATGAAATTGAGAAACACTATAAAAATGTTCAATCTTTCGATGATTATGAG…
OR	OR_TdChr002.7	ATGGAGCATGAAATAATTAATCAACATGAAATAAATATGAGAAATATTCAATTCGGATATACTGTGGTATTGCTCCTTGGATTAATTGCAATGCAATTCTTTTCGGTGTTTTTTGTTTTACTAGAAAATGAAATTAATCCTCAACAAATGTTACTAGTCCCAGCATGGTATCCCTTCGATATAAGTAAAACATCAAATTTTACCATTGCTCAAATACAACAATTCGTCGCTGGATATGCGGTGCTTGGAATGCACTTAGGTACCGATTTAATGCTCTCTAATTTTATGCTCCAAGTATGTTTGCTTTTAAAGTTGCTTAGAAATCGATTGGTCAGCTCGCATCAAAAAGAATTTTATGGTCAAATAATGTATAGAGAAACGGAGCGACTGGAATTCGAG…
OR	OR_TdChr002.8	ATGGCGCAATTCGCTTCGGTGTTTTTCTTTTTACTAGAAAATGAAATTGATCCTCAACAAATGTTACTAGTCCCAGCATGGTATCCCTTCGATATAAGTAAAACATCAAATTTTACCATTGCTCAAATACAACAATTCGTCGCTGGATATGCGGTGCTTGGAATGCACTTAGGTACCGATTTAATGCTCTCTAATTTTATGCTCCAAGTATGTTTGCTTTTAAAGTTGCTTAGAAATCGATTGGTCAGCTCGCATCAAAAAGAATTTTATGGTCAAATAATGTATAGAGAAACGGAGCGACTGGAATTCGAGAAGAAAGCAATTGCAATATTAGCAAGAGACCATCAGCTGATTCTGAAAAAAGTGATTCAGTCCCGACACGTCATGTTTTCAGAGCAA…
OR	OR_TdChr006.15	ATGTTTACTTCATACACCCTCAAAATTGCACGTCACGGAGTCGTGGAAGTTGGGAACATGTCCGAAGTAATAGTTCTTTTCGGTATTTTCTGGCGTTACGTGCATCTTTTCCGACATCGTGTCCAATTTTTGACAATGTTTAGATTATGCGAAGACATCTGGGATAATCTGAAATTTTCTGAAAAAGTCCAGGTTTCATATTTTACGAAGAAGAGCTGTCTTTTAAGTTGGCTCTACATAATTATTACAGGACTGATTGCTTCTTGCTATGTATTGACGTCGTATATAATGAAACCCGCTGAACTCCATGTAAATGGAACCTCTCGAAGAATGTTGCCTTACAAATTTTACGTGGATGTTCAAGAAACGCCATGGTTTGAAATGGTGTGTGCATTGCAA…
OR	OR_TdChr006.20	ATGGCCATAAGAGAATTGCAGGAAATTCCAGAATTTGAAGATATCGTATGGCCAACGAAGTATATTTGCTGGTACATTGGGTTCTGGCCGGTAAAAGAAGATGCGTCTACAGTCACCAGAATCTTTTCTCATTTTCGTGCTTATTACGCATTGTGTAGTTTACCTTTCTTCTTGATTCCGGAAGCATTACTCATTTATCACTCTTGGGGTAACATTGAAGTAATAGCTGGAGCTGGATGTTTTTTTTGCGGTCTCCTTTTGACCTTTCTCAAAGAAGCTTACGTAATTGTTAGGCGAAAAAGGGTTTTGCGCTTATTCAAAATTACTAAAGAACTTTGGAACAACAGCAGAGACTCCCCGGATCGACTGTCTGTCGTCAAGCTGGCATACTTCGCTAAA…
OR	OR_TdChr006.30	ATGCTGCAAGAGGAAATTGTATGTTGCACGAAAGCTAAATACCATTTAATAACACCACCCACAGTGTTCGATGGATCGGACAAACTATCACCGTTTCCTCACAGTGAGGATATAACGATGGATAACGACGGCCTTCACATCGAAAATCAAGTGCTGCCAGGTGTATTTACCATTTTTAAATCCATTGGACTTTGGTACCCGATGGATTGGCCAGATCAGAAGAGGCAGATTTACAATTGCTATACAGTGTTAGTCGTTCTACTATTGTGCAGCGCAAGCATGACAGAAATTTTATACTTTGCATTGAGTGTCGATAGTTTTGATGAGGCATTGGCTGATGATATTTGTGTAGTTTTGCCAGCCATTAACAACAGTATGAAAATACTGTTCTTTTTGGCA…
OR	OR_TdChr006.31	ATGGATGGAGAAAAAAGAGATCTCGCAACGGAAAGCGAAATTATTCCAGGAGCCTTTTTCATCTACAAATTAGTCGGATTTTGGCATCCAATAGGATGGCCAGTGAATAAAATACTAATATATAACTTTTATACCGGAGTAGTAGTTTTTCTACACGCTAGTGCTATTGTTGCAGAGTCCTTGTACTTCGTTTTAGGCAACAATAACTTACTGGATGCTCTCGTAGATGACATTTGCATGATTTTACCTGCTTTTAATAATGTCATAAAAATGTTTGCATTGTTAATAACTCGAGAGCAAGTAATAATGTTGATTAATACTTGTTATGATCAGAGGTGGTATGCAAATAGGAATGCTGAAGAAGTGCAAATTCGAAGTGAATTCCATCGAGCAGCAAGG…
OR	OR_TdChr006.50	ATGGCTTTCTATATTCTGTCAGTTCATTGTATCGGTACGTTAGTCTGTATAAAGATAACGAGCACTTCAGATATGGACGATGAGGATGAATTCGGAGAAGCAGATTTTGAGAAGGCCATAGGATTGAATAGATTTGCTCTGAGTATCATTGGAACGTGGCCAGGACTCTTGAACGACGAACAACATTATATAGAAAAACTTCAAGGGCCATTCATAATTTTGTTCATACTAATAGCCGTAATCGCACCACAAACGTATGCCCTAGTTTTGGTAATCAACGATTTACCTCTTGTCGTCGAAAACATAACCACATTATGTTCGTTTACAACTTCAGCTTTTCAACTACTATTCTTTTACATCCATACTTCAACTATCTTGACAATAATGAAATGCGAATGG…
OR	OR_TdChr006.88	ATGAAATATTTAAATAAAAATCAACCGATGTCAAAAAATGATAAACTCGACAGTTCAGAGTTCGAGTGGGCAATCGGACTGAACCGAATAGGATTGAAATTAATAGGAGTATGGCCGAATCATACCAAAAAAGACACCGCGATGAACATTCGTGCAGCTGGAGCAATTTCGTCGCTTATTTTTTGCCTGTTTATACCACAAATGTGGGCTTTAATGATAGTTCGTAAGAATTTAATACTGGTCATGGACAACGCATTGATGAGTGTCCCAGCGTTAGCATCGGCAATAAAAATTGTTTTCCTACGGAATGCTGAAACAACATTGGGACTTGTGGTACGAAATATTGCTGCTGATTGGTCTGAATGTAGAAAAATTATGCAAATACGAGCTCACCGAGGC…
OR	OR_TdChr006.98	ATGCATAAAATATATAATTTCGACTGGGCAATAGGCATGAACCGTAGCGGTTTAGTCGCGTTTGGTATTTGGCCCGGAATAGTAGGTGGGAAGCAAAATAAGGATTTTCGTCCCCTATGGATGACGGTGATAATGATGGCAGGAATTTTTTGTCCACAAATGTACGCAATGAGTCGCATCATTAATGACTTACCTCTTGTTCTGGATAATATTATGACGAGCTCTTCGATAACGCTTTGTTTTATGAAAATACTCATTTTTTGGAAGAACGAACATGAACTGCAATCAGTAGTGGAGTCCATGGAAGCTGATTGGAACCAACCCAGGATTGATTATGAACAAAAAATCATGATGAGAGAAGGAAGACGTGGACGATCATTGACCATCTTCTGTTATATT…
OR	OR_TdChr004.1	ATGGCTAGAGATGATTGTTTGAAACTTTCAATAAAGAACAATAAGCTGCTGCTGTCAGTATTTGGCATTTGGCCGGAACAACCTCAATCAAGCAAGTTTATCAGGTTTCTTCAATGGTTTTGGATTTTGCAACATATTAGTATAATGGTAGTTGAGTTTATTTACTTCACTGAAATTACATCTGACGTTGAGAATGCATTCGAATGCGCAAATGTCCTTATTTACCAAATTGCTTCAGCACTTAAGTTTGGGAACAGCAAATTGAACAAGGATAAGATGAAAATTCTTCTGGATCATATGCGTCATGACTGGAAATCTCTAACAGATGAATGCGAAACGGCCATATTACGAAATTATACTGAGACTGGAAGAAAAATAAACGTGCTTTATATTTGTTAT…
OR	OR_TdChr004.5	ATGATTGAAACTATAGGTCAAAGTGGTGACATTGGAAAAGAAGATTTTGAACGAGCTTTCGGACTGAATCGAACATGCTTTTCAATTCTTGGCATCTGGCCGGAATATAGAGCGTATTTTCGTAAATACATACAAACACCGTTTTTGATCGTGTTTTTATCGGTATGTCTGTTAATACCCGAATTGTGGGCGCTGGTTCTGGTTATCAATAATCTATCACTCGTCCTCGATAATATATTCGTCGTAACTGCGACTACAACAATCAAACTCATTATATATTGGCAGAGCAAAGAAAAATTTGCAGAAATTATAGTGATCATCATGCGAGACTGGTGTAGGAATAAATTTGATTGGGAACGTGACATCATGCTAAGAGCTGCAAGGCGAGGACAGATGATT…
OR	OR_TdChr005.30	ATGGATGTTCTACCTTGTCATTTTCGTACTCTGTATTACATGGGTCTATGGACTAAAGATGCAGAAAGTGAAACAGTTATTAGAATCATAATACGTTGTTTGATAATATCTGCAATTTTCTACATCACCGGAACTGGAATTATTGAACTCTTCTTTGTGGATATCCAAGAAATAATTCCTAATCTATTTTTGGCGGTGGGTTATATCACATTAGTCATAAAGTTACTGAATATATTGATCTGGCGTGATAATCTCAATAAACTGCTTGACAAATTTCGGTCAAAAACGTGTCAACCTGAAACGGTTTCAGAGAAAAAAATTCTTGAACCTTATTATAACGCGGCAGGAAATCTCCATAAATATTTTGTATCTATATCATTGGTGGCCTGTATATGTATT…
OR	OR_TdChr005.31	ATGGAAGGAAACAATCCAGGTCTTTTTGCGGTTGTAACTACTGACATTCGTAAAGATTATATGGGATTAGTCTTAATATCTCTTTTTAAAGCTTTGGTATCTCTTTGTGCCATTAGAACTCAAATATATGAGGACATCCAATTTTCCATGCAAATTTTGCAAAATATTGTATATTATCATTTGATTGAGGGCTTCGTAGAGGTTTGGTCTGGAAATAAGACACTAATGGAGTATGTACTTCCTTACAGGAGAAGCTTTGAAACTAAAGGTGCCTTCGGAAAATTAAAAATGGACATCCTGCCTAATAATTTTCGCACCTTTCATCGTTTAGGATTATGGAGTGAAGATACTGGAAAAGAATCAAAGTTTCAAACAATTTTCCGAATTTTTTCAATTATC…
OR	OR_TdChr005.33	ATGACCAACTTCCTCATCCGACATGAACATCTAATCAAATTACTAGAGAAATTCAGATCAAGTACTTGTCAACCAAAAACTGATGGGGAGAAAAAAATGCTTAAAAAGTACAGCGATACTGCTGCGCTTCTCCACAATTATTACATAAATTTTGGTATTGTATGCTGCGTAACAATAGTTGTCTTTCCACTTGTTAACGTATTTAGGAGTGTGGAAACTGAACTTCCTATCAAAGCTTACCATCCTTACAATATATCCAAACCAATGAATTTTTGGTTGACGTTTGTCTTCCAAGCAATTTTTGAGCCTTACTATGGAGTTCTTAACATGTCCTTTGATACAATGACGTGCGGTTTTATACTGATGGCAACTGGTCAAATTGACCTCTGCTCCTATAGG…
OR	OR_TdChr005.42	ATGTGTTTTGGTGAAATTATCTACGTCTTTTTTACCACGAATATAACCCAGACTCTCTCGGGCGATTGTGCTCAATTTCTTGCTAGGCTACATACCACTCTTCGAATTTTAGCAATCACGTATAAACGCGAAGCGATTTATGATCTGATACGATCATGTATCGATGAACGTTGGTGTGGAACACAAGATAAAGTTGAAGTTGCTATTCTTCATAAAACGAAACATAGAACGAGGTTGCTGACAATAACATTTTTATGCGTCGCGATATCATGTGCCGCCTCAATTTTCATCAGAAGGATTGTAGATGAAGGTTCTATAATGCAATTACCGATCAATATGTGGAATATACTTGATGTGGAGAAACCAAGAAATTTCTGGTACACGTATATCTTCCAAATG…
OR	OR_TdChr005.43	ATGGGTCTTGGTGAAATTATCTACATATTTTTTAACGCGAATATAACGGAGACTATCAAGGGTGACTGTGCTCAATTTCTTGCTAGGTTACATGTAACTCTTCGAATTTTGGCAATCACATACAAACGCGAAGCGATTTATGATCTGATACGATCATGCATCGATAAACGTTGGTATGGAACACAAGATAAAGTTGAGACTGCTATACTTCATAATGCTGAACATAGAATGAGGGTGCTGACAATAACATATGTATGGGCCGCGACCACATGTGCCGCCACAATCTTCATCAGAAGGATTGTAGACGAAGGATCTATAATGCAATTACCGATCAATATGTGGAATATGCTTGATGTGGAAAATCCAAGAAATTTCTGGTACACGTATTTCTACCAAATG…
OR	OR_TdChr005.44	ATGGATATCCTACCGGAAAACTTTCGAACCTTGATATATCTCGGAATTTGGCGGGAAGAAAATGAAAGATTTTTCTTTTCATTGTGGTTGTACAGAATTTTGGTATTTTTCGTGGTGACCTATTTCACAGTTACTCAGACGATCCAGCTGACAAGGTCCACCAGTGTTACCGATTCCGCCGATTGTATTTTTCTCACCCTGTCTTTTTTTGCGGTCTACCCGAAGTGGATTAACATAACCTACAGGCGTAAAAAGGTTTTGGAATTAAGAAATCGTTTTTGCACCAGCATCTGCCAACCACGATGCCTAGAGGAAAAAGAAATTTTGGAAAAGACCGCCCGCGACGCTGTATGGAGTCATTTATTTTATACAAGATTGGCAATATCTTGTGGGATATGT…
OR	OR_TdChr005.58	ATGGTCTCCCACGGTTTAGCAACGACCTTATGCGCTACCTTTGGCTGGTCCGGCGAATCGTTTAGTGTTCGCAAAACTTTCCCGACATCCACATCTATGGACTATAAAGGCGTGAATTTCGATTATGTGATCGCCCTACCTCGAATAGGTCTGGGGATTGTGGGAATCTGGCCAAATCCAAATTCCACAAATGCCGAAGATATATTTGCAACGCTCAGATTCGTAACATCAGTCATTTTAAGCGTCCTGTTTATAAATGCCGCTCAAACCGCCCAATTGGTATTGGCGTGGGGCGATTTGGATCGAATGATGAACATCATCTCCATAGCAGATCTTCCAATGGGAATCGCAGTAGTAAAGATAGTCATGCTTCGAGTTAATAAAAACGCTCTACGATCG…
OR	OR_TdChr005.64	ATGTCTGCGGAAGCGTTGCCTAACTCGGATTTGATTCCGACATTCGACGAATCCATGAATATTATCAAAAAATCTATGGAGGTTTTAGGAATTTGGCCGGAGGATAGCAAAATAAAAGATCGTTATTATATCTTGAAAAAACTATCCATCTTGGTGCAATATGCAACAATGTGCGGTTTCCTAGTTTCGCAATGGGGCGATCTTTACGTTTGTTGGGGTGATATTGACGCTATGACTGATAATTTATCCAACCATATTATCACTGTTAACGCTTTGGTTAAATTGTCATATCTTGTTATTAGAAGTCAAAATATTAAGGAAGTTATTGAAACAATGAGACTAAAATGGGATGATGTCACGAAATTTTCAATTATGGAGCAGCGAGATTTGTTGTTAGAA…
OR	OR_TdChr003.1	ATGGCCGATCAACTTGCAAAGTATCGAACTTATATCTATTCAGTAAAGCATTTGCAACAGCTGAGCGGTCTTTGGCCACATGGCAACAGAAACATCAAAACTACGATAAATGTATTTCTATGCATCATGAGTGTTTTCATGGCCATCTCAATCATTGGGTACTGCGCTACTCATTCGGGTAATCTGCTTTCTTTGACCAGTGCCCTTAGCCTTTCCATCAGTTTTTCTACGATGTTCTTGAAGATTTTTTTTCTAGCGTTTTACCGTGACATCGTGTTGGAGCTTCACGACAGCCTGGACTTGAGAACAGAAAACAGTTTAAAATATCCAGAATTTCGGAGTCACGTCTTAAGGCACATCTCCGCCTTCAGAAACCTATCAAGTTACCCGATGTCATAC…
OR	OR_TdChr003.26	ATGTTGGAGAACCTTCGACAAAACAGTGCCTCGTTATGTCATATTTTTTTCAAATCAAAGTGTAATACCCCACAAAAGTCAACATATACGAACATTAGAGACTTAGAATGGGCGATAGGATTAAATCGTATAAGCTTAAGCGTTTTCGGTATATGGCCAGGAATTCCCACTGGTCTAAAATTCAAGAGGAAATACCTTCGACTGATTCTACAAATTATGCTAATGACAATAACAATTTTCATCCCACAATTTCTCGCCATGTACCAGGTCAGACATGAATTTCCGTTGGTGCTTGACAACGTAATTACGAACACCACAGCTATGCTTTCAGCTCTAAAACTATTCGTTTTCTGGCTTCGACAGAAAGATTTAGTCATGGTTTTAATATCAATGGCGGCC…
OR	OR_TdChr003.3	ATGGAGACTGAACTTGCAAAGTATCGATCTTTCCATGGAATCGTAAAGCTAATGATGAAAGTTATTGGGCTCTGGCCATCGCATGCCAGTAATAGAATCGTTGAAAGTACATTGAACTGGACGATCATCGCTCTTGGGGTCGTGGCCAGTCTTTCTGTCTTCAGTTTTAGTATACATCACCGTTCGAACATACCTCTGCTCACAAGTTCAATGAGTTTTAATGTTAGTTTCATCACCATGGCTTTGAAGGTGGCATGGCTAATGTCATACCGAAATTGTCTGCTTGAGCTCAATACAATTCTTGATAAAAATTACGAGGAGAATCTGAAGGTATCGAGTTACAAGGCCAGTCTTTTGAAACGAGTGGCCATCTTTCGAGGATTTTTTTGTACATTGCTC…
OR	OR_TdChr003.4	ATGGACGATCAACTTACAAAATATCAAACTTATGTGTATTCCATTAAGCGGTTGCAACAACTCAGTGGTCTTTGGCCACACAATAACAAAACTTTTAAACGGACGATGAATATATTTTTATGCGTTCTAAGCATATCTATAACCATTTCCATCATCGGGTATATCGTTACCCATACAAGTAGTATTTTGTCTTTGACAAGTGCTCTTAGCCTTTCGATAAGTTTTTCTACGATGTTTATAAAGATGTTTTTTATATTTATACATCGTGATGTGATATCAGATCTTCATGATACTCTTGAAATGGAAACATCAAAATGCCTGAAATATCCAGAATATCGACCATTGGTACTAAAACACGTTAAAGCCTGTAGCAACATGACGTATATGCTGATCGTCTCG…
OR	OR_TdChr003.5	ATGATTTTAAAGATTATTTGTTATCTAACTCATCGTAAGGTCTTAAAAAGCCTACACGAGACACTGGAAGATGAATTCATGATCAATCTCAAGAAAACTGAATTAAGACCATACTTACTAAAGCGGATGATGATGTTCAGTAAGGTTTCGATAGTAATGGCCAGTGGTAATGGCTTGGTATTTCTAATGTTCACATACATGACATTGAGACGTATTTTTGTGGAAAAAAAGTACATCCTACTTTATCCGGCTATATACCCAATATCGTTCGAACCTGGAAAGTCTATTTATTGGGCACTTCTTATTTTCGAAATTGTACTCTGCTTCTATTTGTCTTGTGTGACAACAGCTGTTGATGTTGGATTCATATATTATGTTTTTCACATTTGCGGCCATCTC…
OR	OR_TdChr003.6	ATGGAAGATCAACTGAAAAAGTATGAATTGTATATTCGCAGTGTTCGAACATTGTCTATATTGTCGGGGATGTGGCCATTAGTTCAAGAACATCCGGTTCTTCTTCGAATTTTATTATTTCTTGGAGGGTTCTCAACCACAATGATGTGTGTAAGTTCTATACATTACTGTTGGTATAATGCAGCAAACATCATGTTGTTAACGAGAAGTTTGGGACTGTTGGTTGGTTTCGGAGCAGCAGTGTTGAAGATATGGTGTTTCGTGTCACGTCACGATTCGATCGTGTACTTATTCAAAACCTTAGAATATGCATATTCCAGTGATTCTCAGATTCCAAGCCAGATTCCCGAACTATTGAAGAGGTTACCACACTTTATCCGTTTTTGTTACGCATTAGCA…
OR	OR_TdChr003.24	ATGACAAATAATATTATGAAGTATCTAATAACATATTATGTAAGAAAGATCACTTTTGAGATGGCACTGGAAATTTCCGATTACGCTATAGAAATAAATCGATATATTCTTAGTCCTATCGGTCTTTGGCCAATATCTAAACAAGATACTTTTTTCTCAAGACATGTCAATAAATTGCGAATTATATGTACATATTGGCTAGTACTTTTTAATGTATTACCATGCGCCTTATTTACATTTCTCGAAGAGGTAGATCCGACTAGAAGGATTACTTGGTATGGACCCATGACGTTTTCAGTGATGGCAATACTCAAACTCAGTTTTTTGATTCTTGGAAAAGACACACTTGTAAATTGTTACGAGCACATTGAATGGGACTGGAAGGAATCATTAAATTGT…
OR	OR_TdChr003.8	ATGATTCCCCTCAAAGCGAAAGGGTCCGAGAATTATAAAGAAGAACCAGACCAAGCAAAAAGAATTCTGTGGTACGGACCAATAACGTTTGCAACCATGGGACTAGTGTTGCTAAACTTCTTAACATTCGAAAGAGAGTCTGTCATGAAATGTTACGATCACATAGAGAAGGATTGGAGAGACTCCACAGATTCTCCAAGTGTTTTTATTATAATGAAAAAAAATGCAAAATTTGGACGGATGATGATCGTAGCCTGTGCTATGTTTTTTTATGGTGGTGCAATTTTCTATCATGCGATTATGCCAATGATTACTAAAAAAAGTTACATGTCAAATTCTCCAAATACATCTACGAAACCATTAGCATATGCAGTTTATACTAAGGTGATAAATATAGAC…
OR	OR_TdChr003.9	ATGTTCGCATTTTTAGAAGAACCAGATCAAACGAAAAGAATCCTTTTGTATGGTCCAATAACATTTGCCACAATGGGACTAGTGATGCACAACTTTCTAAAGTTTGATGAAAAATCTGTCATGAAATGCTACGACCATATAGAGAAGGATTGGAAAGATGCCTCGAATTCTCAAAGTATTTTTGAGATAATGCAAAAGAATGCACGTCTCGGGCGGATGATGATCATAGCCTGTGCTATGTTTGTTTATGGTGGTGCGATATTCTATCACGCAATTATGCCCTTGCTTTCGAATCAGTCATTTGACTCCAGAAATACATCCGCTAGACCGTTTGCATATGCTGTTTATACTAAAGTAATAAACGTGCACAAAAGTCCGAATTACGAGATAATATATGCT…
OR	OR_TdChr003.10	ATGGTACCATATTCACTACACACATTCCTTGAAGTAACAGATGTTTCTATTAAACTGAATATGATGGGCCCATTGAGTTTTTGTATAATGGTTCTTTCCAAATATTGTATTCTGGTATCTAATTTAGGAACCATACGCAAATGCTTCGACCATATAAAAGATGACTGGAGAAATGCTATGAAAATCGAGAAATATCAAGTTATAATGAAGAAAAAAGCAAAAATTGGGAGATTTTTGATAACGATGTGTGCGATAATTATGTACGGTGGAGGTGGACTCTTTCATTTGATTATGCCACCAGTGTCGTGGATATTTAGTAGTGGTGCGTCGTTAAACGAAACATCTATCAAGGCGTTAGCATATCCAGTTTACAATACAGTCATAAACCTTAATTCTAAT…
OR	OR_TdChr003.11	ATGTATACCTCGCCTTACGAATATGCTGTGCAATTAAACTGGTACTGTTTGTCCCTGATTGGTGCTTGGCCATCTTCAAAAAATACTAGCTATCTTAAAAAATATGTTAATTTAATTTTAATTGTATTTACTTACGTTACGTTCTTTTTCGATTTAATTCCATGTGCGCTTTATACGTTTCTTGAAGAGACGAATCCTCTGAACAGAATCACTTGGTATGGACCAATGAACTTTTGCATAATGGGATTTGTTAAATTCACCTCATTACTTAATTCTCAAAGTAGTATTAAAAAATGTCACAAGCATATCGAAATTGATTGGGAAGAATCCGAGAACATACCTTCTCATATGACGGTGATGTTAAAAAACGCAAAGTTTGGACGCTTTATGGCTATTGGA…
OR	OR_TdChr003.12	ATGTTTACCACACCTTACGAGTACGCTATACAATTGAACCGGTATTGTTTGTCCATGGTTGGAGCTTGGCCAGCTTCGAAAGATTCAGGTGTATTTAAAAGTAAACTTGATATAATTTTGATTGCATTTACATACATTACGTTCTTTTTCGATTTTATTCCATGCGCGCTTTATACGTTTCTCGAAGAAACGACTGCAGCAAGGAGAATTACTTGGTATGGCCCAATGAGTTTTAGTATAATGGGATTTCTCAAATTCAGCTCATTACTTCATTCTCAGAATAGCATTCGGAAATGTCACGAACATATTGAAAGTGATTGGCAAGAATCAGAAAACATACCTAGTCATATGACGGTGATGTTAAAAAATGCTAAAATGGGACGGGCTTTGGCCATAGGA…
OR	OR_TdChr003.13	ATGTTTACTACACCATATGAGTATGCTGTGCAATTGAACCGTTATTGCTTGTCTATAGTTGGTGCTTGGCCAACCTCAAAGGAGTCCAGTTATCTTAGAAAGAAACTTAACTTAACTCTAATTGTATTCACATACATTACTTTCTTTTTTGGGTTTATTCCATGTGCTCTCTTTACATTTCTGGAGGAGCCAAATCCATCCAAAAGAATCACATGGTACGGTCCACTGAGCTTTAGTATGATGGGATTCTTTAAATACAGTTCACTGCTGAAATCCCAAAACATCATTAAAAAATGCCATCAGCACATTGAACAAGATTGGCAAGAGTCCGAGCAAATACCCAGTCAATTTACGGTGATGTTAAAGAATGCCAAAGTTGGTCGATTTTTAGCTATTGGA…
OR	OR_TdChr003.14	ATGTTTACTCCACCTTATGAGTACGCTGTGCAATTGAATCGATATTGTTTATCCATGGTCGGTGCTTGGCCAACCCCAAAAGAGTCTAGTTTTCTTAGGAAAAAAGCTGAGTTAATTCTTATAACATTTACGTACATCACGTTTTTCTTTGGGTTTTTACCGTGTGTCTTCTTTACTTTCTTGGAGGAGAAAAACCCCTCAGAGAGAATTACGTGGTACGGTCCAATGAGCTTCACTATAATGGGTTTCTGTAAATACAGTAGTCTGCTTAGATCACAAAATAGTATTAAGAAATGTCATAAGCATATTGAAGAAGATTGGCAAGAATCAGCAAAAATGCCCAGTCAAATGACGGTGATGTTAAGAAACGCTAAAATAGGTCGTTTTTTAGCGATTATC…
OR	OR_TdChr003.15	ATGTCTACTGAATCTTACGATTATGCTGTGCAAATGAATCGGTACAGTTTATCCATGCTCGGTGCATGGCAGATCTCCAAAGAAGACTCTTTTTTTATGTTCATAATTAAGAAAGCTCTTAATGTGCTTACATATGCCATGGTACTATTCAATATGATTCCTTGCGTTCTGTACACGTTTTATGAAGAAGCTGACCACTTCAAGAGAATTTTATGGTACGGGCCAATAAGCTTTTTTATGATGGGAATCCTAAAATTCAGTTCACTACTTCAACACACCGATAAAATAACAAAATGTCATGACCACGTCAAAAGTGATTGGGAATTATCCGAGAACGACCCGACTCAATTCTCGGTGATGATACGAAACGCAAAATTCGGTCGCTTTTTGGCTGTAGCG…
OR	OR_TdChr003.16	ATGTTGAACTCTGTAGGGTCGCAACAATATCAAGATCACAGTCGTACTTTCAGGAATTTAGAATATGAAGCAGATACGGAATTTGTAGTTAAGGTGTGTCGTACACTATTAACACCTATCGGAATTTGGCCACGGTTAGGTAGTAAGACATTTTCGGGTGATACAGTGTTGGCTCTAAGAATTTGCGGTATTTTTGCATTTATGTGCTTTCTTATGGTTCCGCACTTCATATACACAATTTTCGATGCTAACGACCTGAGGCGTCTTATGAAAGTAATTGCTGCACAAGTCTTCAGCTCACTCGCCCTTATGAAGTTTTGGTCATTTGTGTTGAACAAGCAGAATATTCGATTTTGCTTAGAGGAGATGCAAAATAATTATCGTGATGTTGAATCAGAG…
OR	OR_TdChr003.18	ATGAGTGAGAAACAGGATGTTACCGAGTTGGGTGGAGGAAGCGAAGTTGATATTAATTACGCAATGGAATTAAACAGGCGAATTGCACGAATTATAGGAATATGGCCATCAAGTACGTCATCCGTCAGAGAATATATTATCAAAATAATAAAAAATATACTATTTTACTCTTTCTTGTTGTACCTTTTACTTCCGGGTATCTTGCATATTGCTTTGGATGAACGTACACTGAAGCGACGAATTATTAAGACAGGTCCAATGATTTTAAATACAATGGCTTTTGTAAAATATTCTGTATTTTTGTCTCGTCAAAGTGGAATTAAAGGTTGCATTGATACGATGTGCAAAGACTGGTTAAACGTTGAGCAAAAAGAACATCACTTTTTGATGAGAAGAAAT…
OR	OR_TdChr003.19	ATGGACTTGAAATCTTCGGTTTTTAGCAATAACATTAAAGATGATATTACATACGCGATTGATTTTAATCGGCGAGTAGCCCAATTTATTGGAATCTGGCCCTTACTTCCGCCATTTCGTCAAAGGGACAAAATTATAAAAGGCATTAAAATTGGTATATCCTATTTTCTTTTGTTATTTATCACAATCCCTGGAGTTCTTCATGTTGTCTTGGAAGAACGAAATTTCCAACGAGGGATTATGAAGGCAGCTCCAATACTTTTAAATGCATTGGCTTTATTAAAGTATTCCGTACTAATTTCTCGGCAAAATGCTATGAGGGATTGCATTGAAGTTATGCAGGATGACTGGGCGAACATTAAACACGAGGAACATCGACAACTGATGTTAAAAAACTCG…
OR	OR_TdChr003.20	ATGGCTATTATAAAAGAAGGGAATGAAGTTCGATTTGTAAATGAAAACTATAAAGAAGATATGGATTATTGTGTAAAAATAGCTAGAATACTGTTAATCCCTTTTGGGATTTGGCCCCGTATGGGCGATAACTCATTTTCCAGTAATCTGAATATCATAATTAGAATTGTAATCACGTTTCTACTTATGCTGTCCCTTCTGGTACCACATTTTATATACACTTTCTGCGATGCTGAGGACCTCAGGCGACTGATGAAAGTTGTGGCAGCACAAGTTTTCAGCGCATTGGCTGTTCTTAAATTTTGGACATTCATCGTCAAGAAGCGGGAAATAAGAAATTGTCTGGACATCATGGAAAATGATTTCAAATATGTCGAATCTGAGGAAGCACTAACTATT…
OR	OR_TdChr003.21	ATGGCTTCTAGAAATGATCCGGACGGTGAAAGGAAATTCGTAAATGAAAAGTATGAAGAAGATATGGAATATCGGATGAAAATAGCAAAAATTCTTTTAATTCCTTCTGGAATTTGGCCCCGTATGGGGGATGATTCTTTTTTAAGTAATCTGACTATTATTATTCGAATTGTAGTCACATTTATGCTTATGTTATCGCTACTCATACCGCATTTCACGTACACTTTCTACGATGCGGAAGATCTAACGCGGTTAATGAAGGTTGTCGCAGCACAAGTTTTTAGCACGTTGGCCGTGATCAAGTTCTGGACCTTCGTCCTTAAAAAAAAGGAGATAAGACATTGTTTGGATGTCATGGAAAATGACTTCAAAGAAGTTGAATCTGAAGAAGCTCTAGCT…
OR	OR_TdChr003.22	ATGATGACAATAGAAGACGAACCGTTTCGCGCACCAAACGAAGCTCTATCATTCACCAATGTCGACTACAGAAAAGATACGAATTACATATTTCTATTTGCGAAAATTCTTTTAACACCAGTAGGCATATGGCCACGTTTGAGTCGATTTATCTTCTCTACTGAATACGGGTTTGCTATATACGTATCCTTCATCTTCGGTCTAATATGTTTTCTTCTCATTCCGCATTTCATCCATACCTTTAATTATTCTGGTGATCTCGGACTCTTGATGAAGATTATGGCTGCACAAGTTTTCAGTTCCGTCGGCGTCTTGAAGTTTTGGCTGTTTATCGCCAACAAAGCAGATATACGCCAATGCGTTGATGAAATTGAAGGGCACTATCGAAATGTTAGAAAC…
OR	OR_TdChr003.28	ATGTGGCCAACGGAAACTCTTCGAGGCCGTATATCTTCCGATTTGGTTTTAGGGTATACAGTATTCACTATGATAGCAGGCTGTTTTGTTGAAGGATCCGATTTTTACTACTCTCTAGATGATCTGCAAGCTCTGGCCTACTGTACACCCTGCATAAGCGCCGCAGCTGCAGAACTCGCCAAACTATTAGTTTTCGTACGTAGTCGAAAAGAGGTACGAGAATTCATCAAATTTACTGAACGAGTATTTTGGAGAGGAAAGTATGATGCTGAAGAATTACAAATGATAAAAAGGTGTGACGACAGGTGCATAACGAATTGTCTTATTTTCATGCTTTTGACCCAAGTGATAACTGCACATTATTTAGCAGTACCCATAATTGAATCTATTGGAAAGAAT…
OR	OR_TdChr003.29	ATGAAGCTAGGGAACAACGTCAATGAATTCTATTCCATAAGGCTGACGCGTTTTTTAATGAGCGCGATCGGCATGTGGCCCACAGAAAATAAGCGTTTGAAAGAAATATCTAACGTCATTTTGGGTTACTCGCTTTTCAACATGGTTGTGGCAGTTATTGGTGAATCCGTCGACTTATACTTTACCAGACATGATTTTACCGCGATTTCATTCGTGATACCGATTGCAAGTGCCGTATACAACGTGACAAGTACACTTTTCATTTTTACATATAAACGAAATAAAATACTAATTTTCAACGAATTTACGGAACGGGTTTTCTGGAAAGAAAAATACAATGACGAAGAATTGGACATGATTAAGAAGTGCGAAATGTTGTGCTTTTCGATTAGCATGATA…
OR	OR_TdChr006.2	ATGGCTTTCAGCGAACGTTTTTGCATACCAAAGAACAGCGGCGAGAAGCAAATTATTGAAAGGATGTCCATTATACGCTGGAATGTCCACGCGATATATTTGACGGTGTTAGGCTTAGCGGCAGTAGTGAAAGTTTTATCACCATATTTCCGGCCTACGACAGAAGAAGAATTACAGGCAGATAAGTTTCTTAACCTTCCAATGGCCGCATGGTATCCGTACGACGTAATACAACCTGGCTTTTATAAATTCACGTACGTTCAGCAAATAGTTGCTGCATTTTTATCGGTCATGGTGACCATAGGAGGAGATCTTATAATGTCTGGAATAATGTTGCAAATATGCCTACAGTGTCGGGTATTGAAGCATAGGATACTAAATAGTACGAATATTGATGAT…
OR	OR_TdChr006.4	ATGGACATCCTGCCGGAAAATTTTCGAACTTTGGTTTATCTTGGCATGTGGAAAGAAGAAGATGAAACATTTTCTCCTATCACGTTTATGTCTAACAACATTTCCGACACTGCTGAACGTGTCTTTTTGACTCTTTCCTATTTTACGTTCTACACGAAATGGATGAATATAACACTCCGACGCAAACAACTTTTGAAACTGAGAAAGCGGTTTCGCGCCGATATCTGTCAACCTCATGGTTTAGAGGAAAATGCTATTATGGAAAAGGCTGCTAACAATGCACTCTGGTATCACTTGTTTTATTTGAGGATGGCAACAATTTGTGGAGTCTGTTTAGCGCTTCGACCTTTTGCAAGATTGGGCATGGGACCGCTTGAATTACCATTCAAAACGTACCAA…
OR	OR_TdChr005.60	ATGCCGCTCAAACCGCCCAATTGGTATTCGCGCGATTTGGATCGAATGATGAACATCATCTCCATAGCAGATCTTCCAATGGGAATCGCAGTAGTAAAGATAGTCGTGCTTCGAGATAATAAAAACGGCGATGCGTTCCGATTGGCAAATGCTAAACAGCAAGCACGAGCTGGAGAACATGATTCGAAATGCAATAACCACAAGAAAGTTGAGTTTCATGTCCATAACTTTCGGAACATCCACGGCGCTGATTTTTGTAGGGCGCCAATTCATTCAAGAGTTGAAAAGGCCGGACAGCCCGATGAATGCAGAATTAATTTGTTGGATGCTTATTTCCCATATAATGAAGAAATAACGTCGAATTATCAGCTGACGTGGACTGGTTCCTGCATTGGGGTG…
OR	OR_TdChr006.10	ATGTTCATTGGTTACGGAATACGCAAATTTGGTGAAGCAATATTTGAAATAGATTACATTTGTGAAACCGTTGTAGTTTTTGGTTTATGTTTGAGGTACGTTATTCTCTTTCGGCAACGCGATCAGCTTGTAAAAATGATAAAGGTCTGTGAGAAATCGTGGGAAACTTTAACGGCTTCGGAAAAGTTCATTACTTTTGGATATGTGAAAAAGATACATCGAATAATATCAACACCGCGAACTTTTGGGAATGAGACAATCTATCGCACTCTTCCTACTAAATTTTATGTCGATGTTCAAGAATCACCATGGTATGAGTTGACATGTCTGTTACAAGTTACGCTAATCTTTAACGGTGGATTAATTTGTACTGCTGTTGACACAACAGCCCCCTTTCTG…
OR	OR_TdChr005.67	ATGTCGACGGAACATTTGTGGGCGTTGGAGAAAACACCGTCTTTCGATGAGTCAATCAACCTCGTCAAGAAAATAATGGTAGTCTTAGGAATTTGGCCAGAGTATAGCAAGGCAAATGATCGCTACTTGGTCTTGAGAAAACTCTCTATTGCAGTGCAGTACACGTTAATGTGTAGTTTTTTAGTTTCGCAATGGGGCGATCTTTATATTTGTTGGGGTGACATCGATGCTATGACTGACAACTTTACCAATCATTGCATCACTATTAATGCTTTGGTTAAGCTGTCATATACCATTGCTAAAGGCAAACCTATTCAGGAAGTTGTTGAAATAATGAGAAAAAAGTGGGACGAAGTCATGAAATTTTCAATAGTGGAGCAACGCATGTTGTTAATAGAA…
OR	OR_TdChr006.22	ATGAATAACTTGGCATTTATGTTAACTCTAATTGGAGAGGTGATAACAACGAAAGTCACGATAGCAGAATTCGATACTGTTGTTGTACTCATGTCGGTGATCATTAGTTGCATGAAAATGGGGTACTTTTTATATTATAAACACCGAATTATTGCTCTTGAAGATATGTTCAAAGAAGAATATTGCATCCCTACAGGAGAAGTAGAAATTGAAGAGCAAATTAAAAGTGATAAGATCGCCAGGGCTTCATCGATAGCTTATTTCATGTTTGCTGAAACGGCCATTATCGGAGGATTCTTAGTATCTATACTGCATGAATTTGAGGACCGCGAATTACACTTCAGCGTCTGGTTACCATACGACCCTTTAGCAACTGAGACCCGTTTTTGGATGACTTAC…
OR	OR_TdChr006.24	ATGACTGATGAAAGGGATTATGAAAATTTAAAATTAGAAGAAATTTTACCGACTCCTTTCATAATGTACAAAATTGTCGGACTTTGGCGTCCTCTGAATTGGACGTTAGGGAAAAAGTACTTGTATCAAATTTATACGATATTTGCAGTCTGTATGGTTTGTAGCGTCTGCTTGACGGAAATGGCACACATTTATTTCGTCGTTGAAAAATTTACGGACATCCTTGATGCAGATATCTGCATGGTTGCAACAAGATTCAACGTTTGGATTCGTATGGTTGCAATTCTGCTGAAACGCAGAGATATTATTACGTTGCTTAAAGCTTGTGTGGCCGAACGCTGGAGAAATGTAAGGGACGATGACGAAGCTGCAATTCATTTGAAATTTAAACGAAAAATT…
OR	OR_TdChr006.25	ATGAAAACCAATCACGAAGATCAGATTGAGTTAGAGGATGAGGTCTTACCAACGACATTTTTCATTTACAAAATCGCTGGATATTGGAGACCGGTTTTGTGGACGACTGATGGAAAGTGCTTTGCTTATAATATTTACACAGCTTTTGTAATTCTTCTAGTGGGAAGTACCAGTGCTTCCGAAATTATCAGCATTGTATTCGATTCGGAGAGTTTTAGTCAGGCCCTATTAGATGACATTTGCATAGTCGTAACAAGGTTCAATGACTGTTTTAGAATTGCTCTTGTTTTGAGTAAACGAAAGGAAATTTTAGGATTGCTGAATGTATGCTTCGCAGAACATTGGCGAGTAGCACGCGATGACACTGAAATTGCTGTAAAAGCAAGATTCAAACGAATC…
OR	OR_TdChr006.26	ATGGACGTTGAAGATGAAGTAATTCCTTATGGATTTTTCCTTCTTAAATGTGTTGGATTTTGGTATCCAGTCTCTTGGAAAAACAAAGCGCATATAATAGCGTATAAAATATACACAGCATTAAATTTGATTGTCATGAGTTTTTCCAATTTTCTGGAATTTACTAACATATTTTTGTACTCTGAAAGTTTTGATAGCGTTATAAAAGATGATATTAGTATCAAGTTATCAAGATTGAACGAAACTTTCAAATGCTCCTTACTTTTGAGCAAACGTGATAAACTCATTGGACTGATCGACAGTTGCACTCACGAACGCTGGCGAACTGCTCGTGATTTGGACGAAGCTACCTTACACCAAAGGTTCACTTGGCTGAGGAAATGGACTTCTGCAGGTTAC…
OR	OR_TdChr006.27	ATGGAGATCCATCCAAAAATACGTGAAATTCAATATGCGCAGGAAGAAAATATTAGTGTGGAAGAGGAAGTTATACCAATGGGCTTCTTTCTTTTGAAGTGTTCCGGGTTTTGGCAGCCGACCGCCTGGAAGGACAAACGTTATATAATTGCCTACAAAATATATACATCATTGAACTTGATGTTAATGGGAACTGCAATATTTGCTGAAATAACTAATATAATTTTATATTCTGATAGTTTTGATCAAGCTGTAAACGACGATATTAGTATAAAGTTGTCAAGATTTAATGAAACGTTTAAACTTTCCTGGCTTTTGAGTAAACGCGACAGAATTATCGGACTGCTGAAACACTGCCTTGACAAACGTTGGCATACTGGACGCAATGACGAAGAAGTT…
OR	OR_TdChr006.28	ATGGACGTAGAAGAAGAAGTAATACCTTATGGTTTTTTCCTTCTTAAATGTGTTGGATTTTGGTATCCGATTTCTTGGAAAAGTAACAAACGCATAATTGCTTACAAAGTTTACACAGCATTAAATTTGTTTTTTATGAGTCTTTCAAACTTTCTCGAATTTACAAACATATTTTTATACTCGGAAAGTTTCGATAGTGTTGTAAAAGATGATCTTAGCATCAAGTTAACAAGATTGAATGACACATTTCGAAATTTTGTACTCTTGACTAAACGTGACAGACTCATCGGATTGATTAATTGCTGCATTCAAGATCGCTGGTACATTGCACGCGATTTAAACGAAATTATCTTGCACCAAAAGTTCAAGTTGCTGAGGAAGTGGACTACTCTAGGTTAC…
OR	OR_TdChr006.29	ATGAGTACTGTAAATATAACGGAAGTTCTATACGTAGCTTTCAATTGGGAAAGCTTTGAAAAAATCCTTGCAGATGATGCATGTCTCGTCTTGACTAAAATCAACGTGGTTTTTCGAATTTCCATTGTTTTGTTGAAACGTAAAAATATCTCACCTTTGTTGGAAGGATGCATCGAGGACCGATGGAGCAAAACTCGAGATGAAGAGGAGTTTGACAATCGAGTTAAATATCATCGTTTGGCCAGGTGGACGACATTGATTTATGCATGTATGACAGGCGGATGTTGTTTGACGCTATGGCTACGGAAGAATATGGATGATGAAACGGACAAAACAGAAATGAAATTACCAATGAACGCTTGGTATCCATACGATATTAAAATACCAATGAACTTTTGG…
OR	OR_TdChr006.32	ATGGGCGTCCTGGATGAAAACGTGATTTTAGACGAAAATGAAATTATACCGGGAGCTTTTGTGATTTACAAATCAATGGGTTGTTGGCGACCGCTTTCATGGCCGGATAATAAGATGTTGATATACAATGCCTACACTGGAGCAGTTGTTGTGACATTGGTTTTTGCAAATTCTACGGAAGCATTATATTTTTTCTGTAATGTTGACAGAAATTTCAGCAGCGCAATCACCGACGACATATGCGTAGTTTTGCCGGCATTTTTTAACGTTATAAAGTTATTCGTTTTCCTCAACAGTCGCAAACAGGTGATCAGATTAATCAACTCCTGCTTCAATCCACGTTGGAACGCGGAAAGGAATGCAGAGGAGAAGGAAATTCGAAATGATTTCCATCGTTAC…
OR	OR_TdChr006.33	ATGAGCGACAGCAAGAAAGAGATTTTTATACTGGAGGAAGAAATGTTACCTACGACTCTTTTCATGGACGCTCTTGAAGATGACATCTGCTTGGTACTGTCGAGGGTTCATATTGTATTCAGAATAATTACTATTTTTCTAAAAAGGGACGGCATAATCCGTCTCTTTCACACGTGTTTGAATGAACGATGGTACATTTCGCGCGATGAAAAAGAAATTGAAATCAAGAATAAATTTAGCCGTAAGGCAAGGATGATAGCCATCGTGTACATGACCCTGGTAATCGTTTGTGGAATGGCTGGATGGATGCGGAGGAACTTCGAGCAAGAAGAAAGCAATCCAACCATGAAACTTCCAGTAAATGCTTGGTATCCGTACGATCTTCGAGTTTCAGTAAAC…
OR	OR_TdChr006.34	ATGGATAACGGTACTGATAAAAAAGTAAGGTTGGAAGATGAGGTCCTACCCACGGCATTTTTTATGCACTGCATTATTGGTTTCTGGTGGCGAGAAGACTGGTCGAAAAGAAAAAAATTTTTATATTTTTTATATACTGGCTACACGATTTTTGTGTTGGTTGGAGTCAGCGTTACCGAACTGCTTTTTATATATTTCAATTTGGAGGATCTGAGCGATGCTTTAGTCAACGACATTTGTATGGTTGTTACCAGATGCAACGGTTTGCTGAGATTGTTAGTGTTTTTATTTAGGCGTGATGAGATTATTCAATTACTTGAAGCCTGCACCGAAAAACGGTGGTACGATACCCAGGATGAAGATGAAATTGCAATAAAAAAAAAATATACGAAAAGTATG…
OR	OR_TdChr006.36	ATGTCAAAAATATGTAGAAAGAAGACAAATTTTAATGAAGACTTCGTGACGATGAAAAATTATACAGAACGCAATAATCAAGGTTTGAATTGGGCTGTAGGCTTGAATCGCTTTGGCTTGCGTTTATTTGGAGTTTGGCCAGGAAGTATAGTTTCTGATGAAACACATAGAACTTCTGTAGCAGTTCCTTTCATGTTTACTGTCACTACAATAACTTTATTTCTGCCCCAAATGTATGCTTTATTTCTCGTAATTAACGAGTTACCACTGGTTATTGATAACCTTTTGACGAGCGTTGCTGTATTCACTAATTCGATTAAACTTTTAATATTCTGGCAAAAGCAATATGGTTTGGCACTGGTTGTAACATCAATAACCGATGACTGGCTGAGAAAACGA…
OR	OR_TdChr006.39	ATGCTTGAAACTAAGTGTCTTAGTATCGAATCAGGAAATAAAGATTTCGAATGGGCGATTGGACTGAACCGTACCTGCTTCGCAATTCTCGGTGTTTGGCCGGAATATAGACCAACTTTTCGTCAAACAATACACGCACCATTTCTGATACTTTTCATATCGATATGTCTGTTAATACCTGAATTGTGGGCACTGATTCTGGTCATCGATCATCTTCCACTAATCTTTGATAATTTATTCTTCGCGTGCGCATTTTCTACACTCAAGCTCGTTATATATTGGCAAAGCAAAGAAAAGTTTGCAGACATCATAGTGATCATCACACGCGACTGGCACAGAGGCAAATTCGATTGGGAGCGCGACATCATGTTAAGAGTAGCAAAACGAGGACGACTGGTC…
OR	OR_TdChr006.40	ATGCTTGAAACTATCAGTCGCAGTGTGGAAATTGGGAAAAAAGATTTTGAATGGGCTATTGGACTGAATCGTACGTGCTTCGCAATTCTGGGCGTATGGCCAGACTATAGACCGAATTTTCGACACTCAATGCATGCACCGTTTATAATTGTTTTCATGTCGATATCTTTGTTAATACCCGAATTCTGGGCGCTGATTTTGGTCATCGATCATCTTCCACTTGTCCTTGATAATTTATTCCTCGTGTGTACATTTTCCGTAATGAAGCTCATTATATACTGGCTGAGCAAAGAAAAGTTTGCAGAAATCGTAGTGATCATCACGCGTGACTGGTGCAGAGACAAACTAGCTTGGGAACGTGATATCATGTTAAAAGCAGCAGGGCGAGGTAGGCTCGTA…
OR	OR_TdChr006.42	ATGCTTGAAACTATCAGTCACAGTGTGGAAATTGGGAAAAAAGATTTTGATTGGGCTATTGGACTGAATCGTACGTGCTTCGCAATTTTGGGCGTATGGCCAGACTATAGACCAAATTTTCGTCACACAATGCATGCACCGTTTCTGATATTTTTCATGTCGATATCTTTGTTAATACCCGAATTATGGGCGCTGATTTTGGTCATCGATCATCTTCCACTTGTTCTCGATAATTTATTCCTCGTGTGTGCTTTTTCCATAACGAAGCTCATTATATACTGGCTGAGCAAAGAAAAGTTTTCAGAAATCGTAATGATCATCACACGTGACTGGTGCAGAGACAAACTAGATTGGGAACGTGATATCATGTTAAAAGCAGCAGGGCGAGTAGGAGTTGTT…
OR	OR_TdChr006.43	ATGTCCGATTTACCTGCAGACACAGGCAGGGAAGATTGTCTGTGGGCAACTGGATTATGTCGTCGTGTGCTCGGTGTTGTTGGAATTTGGCCGGAAGTGCAAAATCCACGAAAATACTCCTATCGGGCTGTGCACGTAGGTTCTGTATTTTTGCTTCTATTACTATGTTTGATCTTACCACAAATGTACGCCGTTGTATTGGTACGGCACAACTTGTTACTGATTGTCGACAATTTGATGGCAAACGTTTCGGTTATTAACAGTGCTATCAAACTTGTCATTATGTGGCTCAACCAAGATCATTTGCTTTCACTGGTAACATCCATAACCGAAGACTGGGTGGAGCCGAAGGAAAATTGGCAGCGCATTTGTGCAACATTATCGCCCGATATAATGTTC…
OR	OR_TdChr006.44	ATGGAAACTCCACATGACCTGCGGTATTACAATTGGGCCATTGGACTAAATCGATTGAGTTTGAACATCATAGGTGTTTGGCCTGATCCTGATACACCACTTAATCATTTTAGTTTTTTAAAATATATACACGTCCCCATCGTAGCGTTATTAATTATCTTTGGAAGTTTATTGCCCCAAGCATATGGATTGTTACTAGTTTTCAACGAAATCCCTCTCTTTCTCGATAATGTATCTCAGACGGTTCCAGTGGCGTTTTCTTCTTCCAAGCTTCTTCTATTATGGCTTCATCAGAAAAGTTTAAGGATAATAATGGGATCAATTAAGCTAGACTGGCTAAAATTAAGAGACAATTGGGAAAAGGAGATAATGCTAGACCAAGCAAAAAGCAGTCGAACG…
OR	OR_TdChr006.47	ATGATTCAAGATTCGATAGAATATCGAAAAGAAAATGATAAAGTATCTTTTGCCTGTTACGAATGGGCAATTACTCCAAATCGTATAAATCTGTGCGTGTTAGGTGTTTGGCCTGAACCTGCTCAGAAGTTCAAAGCGTTTCGAAACTACGTACTTTTATTGTTATCATTAACAATACTAACTGTGGGGCTTTTATTACCTCAAGCGTATGCGTTACGTTTTGTATGGAAGAATCTACCACTATTGTTGGACAATATTTGTGAAACAGTTGCAGTAACGGTATCTCTGATCAAACTTATTATGTTCCGGATAAATAAAAAATACCTTAGTACAATTCTAAAATCAATGAAGTTTGACTGGTCGAAGGAGAAAGAAGATTGGGAAGAACGTATTATGATA…
OR	OR_TdChr006.48	ATGAAAAGAAAAGATACTGCAGATGTTTTACTAAGGAATAATAGTGTAACCAATACAAAAGAACATTATAAAGAACCTTCTTCAGGTTACGAATGGGCAATCCAATTAAATAGATTTAATTTATATATATTGGGAGTTTGGCCTGAACGCGATAATATGTACAAATATTGCCCAAACTACGTATTCTTAACACTAACAGTGGTTATAATTGTCGTGGGCCTCTTGTTACCAGAAGCATACGCATTTTCTTTCGTATGGAGGAATCTTCCACTGTTGCTAGACAATATATCAGAAACCGTCGCTGAGATTATATCGATGATTAAACTTACGATGTTTTGGGTCAATAAAAAATGTCTGCAGACGGTATTGCATACACTGGAAGCCGATTGGGCAAAGGAA…
OR	OR_TdChr006.49	ATGAGAGCAGACGATATCGACGATGAAGATGAATTTGGTGAAGCAGGTTACCAAAATGCTATAGGATTAAATCGGTTCACATTAAATATTCTTGGAACTTGGCCAGAACTTTCGCCGAAAGAACGAGCTCACTCAAAAAATCTTCACGTGCCATTTACAATTTGTTTCCTTTTCGCAGCCATGATTGCACCACAAATTTACGCGTTAGTTTTGGTAATAAACAATTTACCTCTTGTTGTTGAAAATGCAGTCACGTTATGTGCAGGTCTGACCTCTACATTTCAACTATTCTTCTTTTATAAGAACATTCCAAGTTTTTCAGCGATATTGGTAACGATGAAATCCGAGTGGTTAACAAGAAAAAATCATGACGAACGAGAAATAATGTTGAAATTCGGA…
OR	OR_TdChr006.51	ATGGAGTTCTACACCAAGTTAGGAGTGCGAGATTTTACTTACGCGGTACGTTTGAACCGCATTTTATTCAATATCCTTGGAGTGTGGCCAAAAACAAATGTTGCCAAGGTTAAATGGTACAAACTGCATGTGGAACTGATTATAATTTACGTATTCTGTTTTTTAATTCTACCACAAACATTCGCGATGATTCTGGTCAAGAATGATCTTTTATTAATTATCGATAATATGTTAGCATTTATTGCTACAAGTACGTCAAATATAAACATTTTCTTCTTATGGATCAACAATGGTGTTTTTTCATCCATGATTCATACTCTCGAAACGGACTGGTTAAAATCAAAAAGTGATGATGAGCGAGAAATTATGAGAAAACTTGCTTTTCGTGGACGAACACTC…
OR	OR_TdChr006.52	ATGTCAACCTTTCGAGAGTTTCATACGAGAGATTTTGATATAGCTTTAGGACTGAATCGTCTAACCCTCACTGTACTTGGATTATGGCCACCAGCAGCATCGGAATGGCGTTATCGTTTCAAAAATGTTCAGGTGTTGTCAATATTGATTATCATGACAATGCTTGTGCTCTTACCGCATCTATATGCATTGGCCATGGTTATAGATCATTTGCCACTTGTTATTGATAATCTTATGTCATTTACTGCTGCATTCACATCCTTTGCCAAAATATTTTTCTTATGGATCAATATACCGCGTATGAGTCCAATTTTAACAACCATTGCTCACGATTGGTTCATTCTAAGAGATGATGAAGAACGAAAAATAATGTGGAAATTGGCACAAAGAGGTCGCACA…
OR	OR_TdChr006.53	ATGCTGGTCAATTCGAAAGAAATTGGAGAGAAAGATTATGAGTGGGCACTAGGACTGAATCGTTTAAGTCTGAATCTAATCGGCGCGTGGCCTGAAAAAAGTGTTAGCCGAAAAATGATGAGAATAATGCAAGTTCAGTTACAAATAGTCACGATGGTTGGCGGAGCATTGATGCCTCAGTTATATGCCCTCACCCTGGTCATCAAACAACTTCCTCTTGTCATCGACAATCTATTTTCAAACGTTGGAATAACAGCCTCTTTTATCAAACTACTTATTTTGTGGTGCAATAAAAAATGGTTGACAGAGATTACGGAGATTGTCAAGAGTGATTGGTATAAACAAAAAGAAGATTGGGAACGCGAAATTATGCTGAAAATGGCAAAACGAGGACGAATC…
OR	OR_TdChr006.54	ATGACCAACAGCGTTTTGATGAGAGTGGATAATACAGTTGGCAATGAAGATCTTGATTGGGCAATAGGTTTGAATCGTGCATATTTTAATTTCCTTGGAGTCTGGCCAGAAGTGAGCAACAAATCAAGATTGTCTAAATATTTACATGTGCCATTAGAATTACTCTTATTAACAGTAGGTGTGCTGGTACCTGAATTATGGGCTCTGACCAAAGTCACCAATCATCTCCCACTTGTCCTCGATAATTTAGTGCCAACAGCTGGGATTATCGCTTCAACCATTAAACTTTTTTTATTGTGGCGAAGCAAACATATGGAATTGGCTAAAGTCGTGACGACAATTACTTTTGACTGGCGGAGAGAAAAATTAGAATGGGAACGAAACATAATGTTGAAAATG…
OR	OR_TdChr006.55	ATGACGAGTAAACAAGGACATGATAACAGAGGTTTTGAGTGGGCGCTTGGACTAAATCTCTTAAGTCTCAGTTTGATAGGTGTCTGCCCGGAAAAAAATGATCATCGAACTCGTTTTACAAAGTTACAAGTTCCGTTGGAAATAATAGTTATGATAATCGGGGTAGTGGTACCCCAATTTTGCGCCCTTATATTGGTTATAGGTAACTTTCCACTTGTCATTGATAATTTGTCTTCTGCCGCTGCAGTGACAGCTTCTTCAATCAAGCTCCTAATTTTGTGGCACAACAAGGAAAAATTTACAGAAATCGTCACCATTGTAAAGATCGATTGGTATAAGAGAAAGTTAGATTGGGAGAGAAACGTAATGTTAAAAGTAGCTAATCGAGGACGGGTACTA…
OR	OR_TdChr006.56	ATGAATACGAAACAACGGATTGGGGAATCTTATAATGAATTTGGTAACGCAGATTACGAATGGTCAGTCGGTCTGAATCGTTATTCTCTGAGAACACTTGGTGTCTGGCCTGAAGATACCGTGGACCCACTTTGGGGCGATTTGTATGTCATATCGCTCATTTCTTTGATTCTTTTTGGATTAATATTGCCGCAACTTTACGCACTAGTCATGGTTATTAATGATTTATCTCTGGTCGTTGAGAACATTTTCGGAAATATTGCAATGATCACTGCAGCATCCAAGCTTTTTTTGCTTTGGATTAATAAGAAACAGCTGGCTACGATTTTGGCATCCATCAAAGCTGACTGCTTTAAAAGTAAAGCCAATTGGGAACGTGAAGTCACTTTAGCCAATTCC…
OR	OR_TdChr006.57	ATGAAAGCATACGAGTTTGGTAACGAAGATTTTGAATGGGTAGTGGGCCTCAATAGTTACTCACTAAAAGCAATTGGTGTCTGGCCAGAGGGAATTAGAAATCGGAGATTGCAAGACCTACAAGTTGCTTTATTGGTAATAATGATTGTTTTCAGTATCATATTACCTCAATTTTACGCTTTAACAATGGTTGTCAGCGATTTGTCACTGGTAGTCGATAACATGTTGACAAGTGTTGCCCTAACCACGTCCACGACGAAACTCGTCCTGTTATGGATCAACAGAAACAGACTGACAATAATTTTGGCATCTATCAAATGTGATTGTTTCAAACGAAAAGACGACTGGGAAAGGAAAATATTACTGTCCGCAGCCGAACGTGGTCGATTTTTTACTATT…
OR	OR_TdChr006.58	ATGAAAGTATATGAACATGGAAATGCAGATTTTGAATGGATGGTGGGTCTCAATCGATATTCTCTAAAAGTGATCGGTTGTTGGCCGGAAGCGACCGAGAATGAAAGACTGAAAGATATATATGTAATATGGATAATTCTTTTGGTGCTTTTTGGTAATTTGGTGCCACAAATCTATGCTTTGACAATGGTGATTAATGAATTGCCACTTATTATCGACAATGCACTGCTCACGGTGGCCTTAACCACAGCAATGGTGAAACTGACTATTTTGTGGCGAAACAAAAAGCAACTCATGTTCATCATGGCATCCATTAAACGTGACTGTTTGAAATGGAAAGAAGATTGGGAGAGAAACGTAATGTTGTCCATAGCAAAACAAGGCCGACTCTTCACCATT…
OR	OR_TdChr006.59	ATGGAGCCATACCAATATGGAGAAGCAGATTTTGAATGGGCTCTCGGATTGAATCGCTTCTCTTTGAAAACCATTGGAGTATGGCCAGAAGACACAGGAAATCCACTATGGAACGATTTGCATGTTGCTGGACTGGTCCTGTTCCTGATGTTTGGTATTTTAATACCACAAATATATGCGTTGGTTAAGGTTATTGATGAATTACCACTAGTCGCAGATAATTTAATGACTTACGTTGCGTATGCAGTTTCTGCCACCAAAATCATTCTTTTGTGGCACCATCGAAAACGTTTGCTATACGTGATGTCATCAATCAAGTACGACTGCTATAAATATAAAGATGATTGGGAGAGAGATATCATGTTAACATTTGCCAAACGAGGAAGATTAATCACTATT…
OR	OR_TdChr006.60	ATGAGCAAGCTGACTGAAGAACTTGGCAAAGAAGATTTTGAATGGGCTATTGGACTAAATCGCACATGCTTTTCATTTTTGGGTGTGTGGCCGGACTTCAATGCTAAAACAAACTTTCTGAAAGCATCATATGCACCAGTCCTGATAGTTTACTTAATAATATTTTTATTAATACCCGAACTATGGGCGTTGATTCTGGTCATCCGTAATCTTCCACTTGTCCTTGATAACTTATTTATCGTTTGTATTACGGCCACAATCAAGCTTACTTTGTATTGGCAGAATAAACGAGAGTTTTCAGACATAGTACTTGTGATCACACGTGACTGGTGTAGAGAGAAGTCGAATTGGGAGCGAGATATAATGTTAAAAGTGGCGAGGCAAGGAAGAATAATTACA…
OR	OR_TdChr006.61	ATGCTGTTTTCCCAATCTGACAACGTAGAAACTTACAATAAATACGCAAATGAAGATTTTGAGTGGACTCTTGGTTTGCTTCGATTAGGAATGAAAAGTATAGGCATATGGCCGGAAGCTGTTAGTAATAGATGGGACGATTTGCGCGTTGTCATCATCATTGTATTTGTATCTGCAACATTAATACTGCCACAGATGTGTGCTTTCAAAATGGTAATTTCTGAATTTACACTTGCTGCTGAGAACGTTTTTGCGACTGTCGCAATACTTGACGGTTTAGTTGAACTGTTTACTTTATGGATTAAAAAAGGAGAGTTTATTAATGTTCTTGAATCGGTGAGATCTGATTGCCTTAGATGGAAACCTGATTGGGAAAGACAAATTATGTTGCGTTTAACA…
OR	OR_TdChr006.62	ATGGGTCGTCTCATGTACGGTTCTGACGATATTTCCGATAGTTCCGCAGCAGCAGTAGAGTACGAGGCAGCAGTTTGCTTAAATCGTCTCACATTAAAAGCGATCGGTGTCTGGCCAGAGAAGAGCGAAGATAAAACTTTTGAACATAGAGCATTAATCATATTTACTACTATGGCTTGTTTATTAGTGCCACAGATAGTCGCCTTATGCATGGTGATTAATCAGTTACCGCTGGTTATCGACAATATGTTCCAGAGCGTAGTTGTGATGACTTCCTCAACAAAGATATTACTTTTATGGTTTAATAAAAAAAAGTTACGTACAGTGTTATCATCAATCAAACACGACTACTTTAAAGAAAAGGACGAGTGGGAGAGAGAAATCATGTTGACATTAGCC…
OR	OR_TdChr006.63	ATGAAATCTGATGCTGAAATATATTATCAAGCTAATGAAGATTATGAGTGGGCGTTTTCCCTTAATCGCTATTCTTTACAAACAATTGGCGTTTGGCCAGAATATCAAAAAAATAAGTACTTCAGTGATGATCTTTTGGTAATAGGGATTTTGGTAATAATCATTTTTTTAATAGGACCACAAATGTATGCGATGAGTATGGTTTTCGACGAATTGCCACTTCTTATCGATAACGTATTTCAAAGTGTGGTCGTAATGACATCTACAACGAAGCTTATACTTCTATGGATGAACAAGAAACAATTGTCTAGTGTTCTATCTTCGATCAAGTATGATTATTTCAAATGGAAGGATGATTGGGAAAGGAGAATAATGTTAAATATAGCGAAACGAGGAAGA…
OR	OR_TdChr006.64	ATGATGCGAAAACATAGCGAGATAAGCAATGCAGATTATGAATGGAAAGTTAGTCTGAATCGACATACGTTAAAACTTCTTGGAGTATGGCCAGAGGAGAGGGAGTGTTGGATTTCTAGTGATATACATGTGTTATCTCTGGTTATTTTAATATTTTGTGGTTTACTACTGCCACAAATTTATGCACTAACTATGGTCCTCAACGAATTGTCACTCGCCATTGACAACATGTTTTCCAATATCGCAATGTGTACTGCTACTACGAAACTGTGTCTATTGTGGCTGAATAGAAAACGGTTAAATACTGTATTGGAGTCCATCAAATACGATTGTCACAACTGGAAATACGAGTGGGAAAGAGATATAATGTTAGCTCTGGCTAAGCGCGGGCGATTTTTT…
OR	OR_TdChr006.65	ATGCAAAAACATCGCGAGTTAAGCAATGCAGATTATGAATGGGCGGTAAGTCTCAACCGACAAACGTTGCAAGTACTTGGAGTCTGGCCCGAAGAAAAGGAATGTTGGATTTCTAGTAATGTCCACGTTTTGTTGTTGATCATCTTAATAGTTTGTGGTTTATTATTACCTCAAATATACGCATTATTTGTGGTTTTCAACGATATTTCATTGGCTGTTGATAACTTGTACACAACTATTGCTGTGTGTACCGCCACCATGAAACTTTTTCTATTTTGGCTGAACAGAAAACGGTTAAACAACGTTCTGGAATCTATTCGATTTAACTGTAACAATTGGAAGTACGAATGGGAAAGAGAGATTATCCTATCTCTCGCAAGACGTGGCCGATTATACACA…
OR	OR_TdChr006.66	ATGAACATTTGTAACGAATTTAACAGCAAAGCTTTCAACTGGACCATTGGATTAAATCGAAAATGTCTGGATGTAATTGGTGTATGGCCTAAGAAACGATGTAATGGCCCAAATTGTCATCAATCTTTACAAGTTATTTTGGAAGCATTGCTTTTTGTGGTATGCGCTGTATGGCCACAATTGTACTCTTTAATTCTTTTCCGCAGCAATTTGTATCTGATAATTCAAAATGTTTTTACAATTATCGAATATATAGCCTGTGTTGTTAAGATTTTGGTTTTGTGGGCTAATATGGAAGCATTGCAGGAAATACTGAATTCGATTACAACGGACTGGAACACATTTAAAATGCGAAACGGATGGCAGCAAGATGTAATGTTAAACATGGCATATCGTGGT…
OR	OR_TdChr006.67	ATGGTTGCTTATGGACCTGTATATTCTTCAGAGTTCGAATGGGCCTTTGAATTTAATCGGATATGTTTGGATTCGATCGGAGTCTGGCCTCGATGGAAGAACAACGAGCTACTTCAGTTTGTTCAAGTACTGTACGAGGCAGCTTTTGTGGCAGTATGTTTTGCGTATCCACAAGTAAACTCGTTATATCTATCTGGCTCTAATATGGAACTTATTACGCAAAATCTGCTCACATGTGTCGAAAGTTGTATATGCATTATCAAACTGTTTATCTTGTGGTTCAATAAGGAAGCCCTGAAGACAGTTTTGAACTTCATGGTGTTGGATTGGTGTAAAATAAGAAAAGATTGGGAACGCGACATCATGCTGAAAATGGCCAGACGTGGGCGGTTGCTAACT…
OR	OR_TdChr006.69	ATGGTAATCCCTGACGAAAGCAGCTCACAAGCAGACTTCAAATGGGCTACGGAATTGAACAAAAAGTATTTTGGCATCGTTGGAATATGGCCTAAAGATCACAATGATCCATCTAAGTATTGGCAAACTTATCAAGTAATCCTGGAGGCTTTTCTTTTAGCAGTGTGTTTGGTTCTACCGCAGTTTTATGCCTTGATTCTTATTCGAAATGATTTGGATCTTATAATCCAGAATCTTTTTACTGCTATTGAGTTTGTCGCGTGCATTATAAAGGTTGTGGTGTTATGGATTAATTTGGAAGCACTACAAGCAATCCTCGATTCCATCGCAATGGACTGGCATGCTTATAGGCTATCTTGGCAACGAAACATAATGCTAAAAATGGCCAACAGAGGGCGC…
OR	OR_TdChr006.70	ATGAAAAGTTATATTATCCAAAATTCGCAAGAGCTTGCGTGGTCTGTCCGGCTCAACCGAATAGGTTTTACCCTGATGGGTTTATGGCCCAGTTTTGAATTAGAACGTAGCAATTATCGCCAGTATATACAGTTATTGTCAGAATTAGTCCTTGTGGCAATTTTTATTATTTGGCCACAATTTTCTTCCTTACTTCTGTCCGGTAGCCGACTGGAAATAGTCACCCAAAATTTATTGACCAACATCGAATGTTGTACAAGCGTTTTGAAAATGTTTACTATGTGGGCCAAACAAGAAACACTAATTAAGCTTTTATACGCAATGGCGATGGACTGGCATGAACGAAGAAATTCATGGGAACGTGACATCATGTTGAAAGTAGCAAAACGTGGTCGACAA…
OR	OR_TdChr006.71	ATGTCGACTAAAGAAAAACTGCACGTAATAAGTAACGAAATTGGCCATTTTGATTATGAATGGGCAGTGGGCCTAAATAGACACCCAATGAAATTAATCGGTCTTTGGCCGGAAGAAAATACCGGTAGGATACGACTGCAAAATGGTATACACGTTGTATCATTCGTTACTATTGCTGTGTTTGGTTTGCTGTTTCCACAATTATACGCTTTGAAATTGGTAATCCATCAGCTGACTCTTGTTGCTGACAATATAATTCCATGTGTTGCTTCGATGGTATCAGTTGCCAAAATTATTTTCTTACATCTTCACCAAAGAAATCTACGCTTTGTTATGTCATGCATAAAATCGGATTACATGGAACAAAAAAATGAGTGGGAAAGAAAACTAATGTTGGAT…
OR	OR_TdChr006.72	ATGTTAACAAATAAAAAACTGCAGGAGATGAGTAAAACTACATATAACGAGCTGGGCAATTCCGATTATGAATGGGCAGTGGGTCTGAATCGAAATCCCATGAAATTAATCGGTCTTTGGCCTGAAGAAAAACCCGGTAGTATAAAAATACCGAACGACATACACGTTGGATCATTTGTTATTATTGTTATTTTCGGTTTGGTATTACCACAAATATATGCATTGAAAATGGTAATCAACAATGCGACACTTGTTGCTGATAACATACTTCCAACTCTAGCATCACTAGTATCAGTTACCAAAGCTATTCTTTTACATCTTCACGAAAGAAATCTGCGATTTGTTATGGCATGTATAAAATCGGATTACTTGGAACAAAAACATGACTGGGAGAGAAAA…
OR	OR_TdChr006.73	ATGTCTATTCGAAGAAACAACCTGCTGAAGTTAGCTTGCTGCAATTATAATCAATTATGGATATATCGCCCTGGAGTCTTCTTTCTATCGTCGACTGATACTTTTAAAATGAAAGAAAGTAATGCAAAATCGGACGTTAAAGATTTTGAATGGGCTGTAGGATTAAATCGTGTCTGTCTGAATTTTTTGGGAGTTTGGCCAAATACGGGAAATAAGCGCACCAATATTCTACACGTTTCGATAGAAATATTACTCGTTTTTGTAATCGTTGTTATGCCACAAAATTCTTCGCTAATGCTGTCGAGAGGAAACTTCACTCTCGCATTGCAAATCCTATTAACGAATGTGGAATGTTCTACATCCCTTCTTAAAATTTTCATCTTATGGTACAGCAAAGAA…
OR	OR_TdChr006.74	ATGGAAGTCAAAAACAATAAAGATCTACAAAATATTAGTATTGGACTAGCAGATTACGAATGGGCAGTAGGTCTAAATCGACATACGATGAAAATGATTGGTGTTTGGCCCGAAGAAAGATCTGGAAAGAAAAAAATATTGAATGATATACACGTTACATCACTCGTTTCTTTGATGTTGTTTGGTTTATTGTTACCACAATTATATGCGCTGACGATGGTTATCAATGAACTATCACTCGTTGCGGATAATATAACGCCGAGCGTTGCCTCCATGATTTCAATGGCAAAACTAATTCTCTTACGTCTTCACCAAAAAAATCTTCGTTTTGTTATGGCATCCATCAAATATGACTACCTACAACAGAAAGATGATTGGGAGAGAGAGATAATGTTGACT…
OR	OR_TdChr006.76	ATGAAATTAAACCGTGAGGAAGGTGTTAAAGATTTCAAATGGGCTGTCGAGTTGAATCAAGCTGGGTTTGGTTTCATCGGAGTTTGGCCAAATGTCGGAAGTGTGAATGGATTAAAAGTATCGAGTGCGATACTGTACGTTGCTTTAGTTGTTACCGCACCACAAATGTATTCTTTGGTGTTATCTCGCAAAAATTTTGATCTCATTCTAGAAATACTGTTGACAAACCTTGAATGTACTGCAGCTGTCATTAAGTTTATCACATTATGGTATAATAAAAAAGCACTAATTCCAATCCTGGATAGCCTAGCCAATGACTGGCAGACAATGACTTCGGGTTGGCAACAAAATATTATGTCGGATTTTGGCAGGCAAGGAAGATTACTCGGAATGTGTGGT…
OR	OR_TdChr006.77	ATGCAAGTTTACAGTAAATCCGGACTTCAAGATTTCAGCCGCGCAATTGGAATCAATCGAAAGTTTCTTGCAATAATTGGAGTGTGGCCTAAGGATCGAAATAATTCGTTTCATCTACACCAGTGTCTACAAGTCATTTTTGAATGCGTTTTCCTTTGGTTGGGTTCCATATGGCCTCACTTGCGTACCTTAACTTTTTTTCATAAAGATGTAAACCTTCAATTCCGGAATATATTCACTGTTATTGAATTCTCCATAAGCGTTTTCAAACTCTTCATATTGTGGGTAAACATTGATGTGTTACAGGCAATTTTAGATTCAATCTTATTAGACTGGTATACATTTAACGTGACATGGCAACGAGACATTATGCTAAAAGTTGCTAATCGAGGGAGATGG…
OR	OR_TdChr006.78	ATGTGTGAACCAAATTCTAAATCTATGAAAATTGAGAGTGAAACAAACGTTAAAGATTTTACGTGGTCTGCTGGACTGAATAAAATTGGCTTTTCTTTTATCGGAGTGTGGCCTAATTTTGGATCATACAATGGCGTGAAAATTTCGTGTGCAGTTCTATATATTGCGATTACTGTTGTAGCACCACAAATGTATTCGTTGACATTGTCACGCAAACATTTCGATCTAATCTTGGAAATTTTGTTAACAAACATCGAATGTACAGCCACCTTGCCTAAACTTTTGACGTTATGGTATAGCAGAACAGCAATGATCCCTATTATGGAAACATTTGCAAAAGACTGGCGAACAATGACAACAACGTGGCAGCAAGAAATTATGTTAAAATTTGGAGACCAA…
OR	OR_TdChr006.79	ATGGCAATATATAAACACGGCTACGAAGATTTCGAATGGATGGTCGGTTTAAATCGCTATTCTTTAAAGGCGATTGGTTGTTGGCCTGATGAATCCGAAAATGAATTACTTATGGACGCGTACGTGCTTTGGATAATTTTGATGGTTGTGTTTGGGAACATGGTGCCACAACTATATGCACTAACAATGGTCATTAACGAATTGCCGCTTATTATGGATAACGGATTTGTAATGATGGCTCTAACAATGGGCCTGGTGGAGACGATTATTCTATGGCGTAACAAAAAAAAACTGATGTTGATCCTGGCGACTATGCGGTCCGATTGTTTGAAATGGAAGGAAGATTGGGAACGAGAAGTCATGTTGTCAACAGCTACTCAAGGTCGATTCTTTACAATT…
OR	OR_TdChr006.81	ATGGCAGTATATAAGCACGGCTACGAAGATTTCGAATGGATGGTCGGTTTAAATCGCTATTCCTTGAAGGCGATTAGTTGTTGGCCTGATGAATCCGAAAATGAATTACTTATGGACGCGTACGTACTTTGGATAATTTTGATGGTTGTGTTTGGGATCATGGTGCCACAAGTACATGCACTGACATTGGTCATTCACGAATTGCCACTTATTATGGATAACGGATTTGTACTGATGGCTCTAACAATGGGCTTGGTAGAGACAATTATTCTATGGCGTAACAAAAAAAAACTGATGTTGATCCTGGCGTCTATGCGGTCCGATTGTTTGAAATGGAAGGAAGATTGGGAACGAGAAGTCATGTTGTCAACAGCTACTCAAGGTCGATTCTTTACAATT…
OR	OR_TdChr006.82	ATGAATGCATACGAACACGGTCGTGAAGATTTTGATTGGATGATCGGTCTGAATCGTATTTCTTTGAAGATGATTGGTTGTTGGCCGGAAGAGTCCAAAAATCGCATACTGAAAGATGTATACATACTTTGGATCCTTTCCATACAATTGATAGGTCATTTTTTGCCACAAGTGTATGCATTAACGAAGGTTATCAATGAATTACCTCTTGTATTGGACAATGGATATGTAATGATGGCTTTAACAACAGCGGTTGCAGAGCAGATTATTCTATGGCGTAGTAACAAACAACTCGGGTTCATCATAAAGGCCATCGAGACCGACTGTTTCAAATGGAAGGAAAATTGGGAGCGAGACATAATGTTATCCACAGCTGCACAGGGTCGATTTTTGAGTATT…
OR	OR_TdChr006.83	ATGAATGTATACGAACACGGCCGTGAAGATTTTGATTGGATGATCGGTCTAAATCGTATTTCTTTGAAGATGATTGGCTGCTGGCCGGAAGAGACCAAATATCAGTTACTCAAAGACGCATACGTACTTTGGATCCTCTCGATACAAGTGATAGGTCATTTTTTACCACAAATGTATGCATTAACGAAGGTTATTAATGAATTGCCTCTTGTAATGGACAATGGATATATAATGATGGCTTTATCAACGGCTATCGTCGAGCAGATAATTCTATGGCGTAGTAACAAACAACTCACGGTCATCATAAGAGCCATCCACACCGATTGTTTCAAATGGAAGGAAAATTGGGAGAGGGACATAATGTTGTCCACAGCAGCACAAGGTCGATTTTTTAGTATT…
OR	OR_TdChr006.80	ATGGAAATATACGCGCACGGATATGAAGATTTCGAGTGGATGGTCGGTCTAAATCGCTTTTCTTTGAAGGTGATTGGTTGTTGGCCGGAAGAGGCCGATAATGAACGACTGAAAGACGCATACGTACTTTGGATCATTTTTCTGGTCGTTTTCGGTCACTTGGTGCCACAAATGTATGCTTTTTCATTAATCATTAATGAATTACCACTTATGATAGATAACGGATTCATGATAATGGCTTTATCAACGGCCATGGTTAAGCTGACTATCCTGTGGCGGAATAAAAAAAAACTCATGTTCATCATTGCGTCTATCCAGTCCGATTGTTTCAAATGGAAAGAAGATTGGGAGAGGGAACTGATGTTGTCAACAGCAACGCAAAGTCGATTCTTAACTATT…
OR	OR_TdChr006.84	ATGGAAAACAATGTTCAGGGTAGAAATGGCTTTGAGAGGGCAGTAGGTTTGAACCGCCTAGTTCTACGAAAGATTGGTATCTGGCCAGAGGATAATTTGGAAAAAGATAAATACAAATTGGTACGCGTAACGTTAGTGATGTTAGTTATGATAGTTGGTCTTTTCTTACCTTTAATGATGGCGCTGGTTCAAGTTCGCCAAGAATTACCACTAGTGATGGATAATCTTGTTACCAGTATCCCAACTCTTATATCATCTATAAAATTATTTTGTTTATGGTATAACAGAAAAGTGTTAATTCCGGTAATGGCGTCAATTTCATTGGACTGGTGCAAAGCACGAACCGATTCTGAATCGAAAATTATGTCGGAAATGGCGGAACGCGGACGGACCTTCACG…
OR	OR_TdChr006.86	ATGAAGACACAAATGGGAATGCAAGATTATCAATGGGCAACTGGAATGAATCGGCTGACTTTTACCACATTAGGAATATGGCCAAACATATACGCGCTTATTCTTGTTCGTGGAAACATGGTTCTTGTCATTGACAATGTGATGTCAAGTATCGAATGTTTCATGTGTCCATTCAAGATCATTATTATGTGGCACAAAAGAGGAGTGCTACTGTCGGTCCTCGAATCATTTATAGAAGACTGGTGTTTAACCAAATTGGAATGGGAACGGAATATTATGCTGAAAGAAGCTCAACGTGGACGAGTTCTTACATTATGTGGATACATCTTCGCAGGCACTTCATTAATTTCATTCTTGATGATGCCCCTATTTGGAATCAGCACACGCACTCTCAGCAAT…
OR	OR_TdChr006.87	ATGGTGCTAAAAGAAGTACTACTTGGAGAACCAAATTTCGAATGGGCAATCGGAATGAATCACTTCAGCCTCAGCTTACTTGGGGTTTGGCCAGAGCCTTGCAGAACTGAATCGAAGAAGCGAAAATATTCTCGAATAGCGCTTGTCATTTTTACGATGTGGTGCGGTCTGTTTTTACCACAATTTTATGGTATTTTAAAAGTTTTAGGAGATTTACCACTTGTAATTGATAATCTTATTACAAGTTCCGGATGTTTTATGGGTTCTATTAAGCTTTTCATTTTATGGCGTGGAAAAAATGTTTTATCCCCAGTTCTGGCCTCGATCCTAGATGACTGGATAACGCAGAAATTTTACTGGGAACGGCAAGTGATGATATCAATGGCAAAACGTGGCCGT…
OR	OR_TdChr006.89	ATGGAATATTTAAATAAAAATCAACCGATGTCCAAAAATGATAAACTCGACAGTTCAGAGTTCGAGTGGGCAATTGGGCTGAACCGAATAGGATTGAGATTAATAGGAGTATGGCCGAATCATACCAAAGAAGACACCGCGATGAACATTCGTGCAGCTGGAGCAATTTCGTCGCTTATTTTTTGCCTGTTTATACCACAAATGTGGGCTTTGATGATAGTTCGTAAGAATTTACTACTGGTCATGGACAACGCATTGACGAGTGTACCAGCGTTGGCATCAGCAACTAAAATTTTTTTCTTATGGAATGCTCAAACAACATTGGGACTCGTGGTACAAAATATTGCTACTGATTGGTCTGAATGCAGACTCGATTGGGAGCGAAAAATTATGCTAAAA…
OR	OR_TdChr006.90	ATGAAATATTTACATAAAAGCAAACCAACGTCAGAAAACAATAAACTCGAAAGTTCAGAATTCGAGTGGGCAATCGGACTGAATCGAATAGGACTGAGATTAATAGGAGTATGGCCAAACCCTACAAAAGAAGACACCACGATGAACATTCGTGTCGCTGGAGCAATTTCGTCTATTATTTTTTGTCTATTTATACCACAGATGTGGGCTTTGATGATAGTTCGTAAGGATTTACTACTGGTTATGGACAACGCATTGACGAGTGTCCCAGCATTGGCATCGGCAACAAAAATATTTCTTTTATGGAATGCTCAAAAAACATTGCGACTTGTGGTACGAAATATTGCTACTGATTGGTCTGAATGCAGACTCGACTGGGAGCGAAAAATTATGCAAAAA…
OR	OR_TdChr006.91	ATGAAGAGAACAAAAAGTTCAAAAACCAAAGATTTAGAATGGGCAATAGGATTAAATCGACTAAGTTTAAATGCTTACGGCATATGGCCTGGTATTCCTGATGGTCCAGATTTCAAGAGAAAATACTTACGATTGTCAGTAATTATTGTTATAATGATAGTTACACTTTCCATTCCTCAACTGTTTGCCATGTATCACGTTAGGCACGAATTGCCTCTGATACTTGACAACATGATGACCAGTATCATCACTTTGCTATCAACTCTTAAACTCATCGTCTTCTGGTGTCGACAAGGAGATCTAGTAACTATCTTGATGTCAATGGCCTCAGACTGGAAGGAGACACAATGCGATTCTCATCGAGAAATGATGATAGCGGAGGCTCAGCATGGCCGAATG…
OR	OR_TdChr006.93	ATGAAAACGTACAACTTCGAATGGGCATTGGGTATAAATCGCCGTGGTTTAACTTTCTTCGGCGTCTGGCCCGAAAGGTACCTGGAGTCAAGTAGTGAAAATAAAGCGCATTTGCGACTTTTAGTAATGATGTTAATAATCATCATAGGCTCGTTTTTACCACAAATGTACGCTTTATATCGTGTTATCAACGAACTGCCGCTTGTAATTGATAACTTGATGTCCAACGTCGCAATAATTACATCTATTTTAAAACTTTTTCTATTTTGGAACAATCAGAATGAATTGATCCCAGTTTTAGAATCCATGGCTCGAGATTGGGATCATCCATGGTTGGATTCCGATCGAGATATAATGATAAAAGAAGCTATAAGAGGAAGGTTTCTAACTATACTGGAT…
OR	OR_TdChr006.94	ATGTATAATTTTAATTGGGCAATTGGTATAAGCCGTATCGGTTTAAATGTTTTTGGAATTTGGCCTGGAATTGGTGCTGGGAACGCAAATACAACTTTTCGTCCGTTATGGATGACTCTGATAATGACGATGTTACTAATTTATCCACTAATATGTGCCATGAGTCGTGTAGTGCATGAGCTTCCTCTTGTTCTTGACAATCTAATAACGAGTTCCACAACAATACTCGGTTGCATCAAAATATCACTATTTTGGATGAGCGAGAATGGCTTACAACCAGTTCTGGGGTCCATGGAAAATGATTGGAAACAGACAAGGCTTGCTGAGGAACGTAAAGTTATGGTGAGAGAAGGAAGACGGGGTCGCCTATTAACTATTTTTAGTTATTCGATATTGACC…
OR	OR_TdChr006.95	ATGCATAATTTTGATTGGGCATTTGGTATAAATCATATCGGTCTAAATATTTTTGGTTTGTGGCCTAGAATTATAGAGAGGACCGGAAATAAAAATTTTCGTCCGTTATGGACAAACGTAGTGATGGCGACGGCATTATTTGGCCCACAAATGTATGCCATGAGTCGCATAATCCATGAGCTTCCTCTTGTTGTTGATAATCTTATGACGAGTTCTTCAACAGTACTTGGATTTATCAAAATATTACTTTTCTGGGTAAACGAAAAAGAATTACAACCAGTTTTGGCGTCAATGGAAGCTGATTGGAAAAAATGCAGAATTGATGCAGAACGACAAATTATGATAAGAGAAGGAGAACGTGGCCGAAAATTGACTATATTTTGTTACCTGCTCATGACA…
OR	OR_TdChr006.96	ATGTATACTTTCGATTGGGCCATATGTGTAAGCCGAATCGGTCTAAACGCTTTTGGTATTTGGCCCGGAATTGTCGGTGGGACCAAATATAAGAGTTTTCGTCCAGTATGGATGAACGTAATTTTGATGGTCACTATCATCGGTCCACAAATGTACGCTTTGAGTCGTGTAATTAATGAGCTGCCACTTGTTCTCGACAACATAATGACGAGCGCTTCGACATTGCTTGGTTTCACTAAAATACTGCTTTTCTGGGTGAATGAAAGTGAGCTAAAACCAGTCGTGGAATCAATGGCAGCTGATTGGAGACAATCCAGGATTTCTTCAGAACGCGAAGTAATGATCAGAGAAGGAAGACGTGGACGTCTATTATCCATTTCATGTTATACTCTTATGACG…
OR	OR_TdChr006.97	ATGCAAAAAATATATAATTTCGACTGGGCAATAGGCATGAGTCGTAGCGGTTTAGTCGCTTTTGGCATTTGGCCCGGAATAGTCGGTGGGAAGCAAAATAAGGATTTTCGTCCCCTATGGATGACGGTGATAATGATGGCAGGAATTTTTTGTCCACAAATGTACGCAATGAGTCGCATCATTAATGACTTACCTCTTGTTCTGGATAATATTATGACGAGCTCTTCGATAACGCTTTGTTTTATAAAAATACTAATTTTTTGGAAGAACGAACATGAGCTGCAATCAGTAGTGGAGTCCATGGAAGCTGATTGGAACCAACCCAGGATTGATTATGAACACAAAATCATGATGAGAGAAGGAAGACGTGGACGATCATTGACCATCTACTGTTATATT…
OR	OR_TdChr006.99	ATGTACGATTTCGAATGGGCTCTAAAAATAAGTCGAAGCGGTTTGCAATTTTTCGGCGTTTGGCCAGGAATTAGCGCAGAAGAAATACGCGATAGAAGTAATCTACGACTTATATCGATATTAGTGATTGTACTTTTTGGTGCATTTTTGCCACAGATGTATGCCATGTATCGAGTCGTTCCTGAGCTACCGCTTGTAATTGACAACTTAATGACAAGTCTGGGAACCATGACATCAATGTCGAAATTAATCCTTTTTTCGAGAAAGCAGAATGAAGTAAGTAGTATTTTGGTATCGATTTCGCATGACTGGAGGAATTCGAAGATTGAATATGAACGCCAAATAATGGTAAAAGAAGCTCAACGTGGACGTTTTCTGACTATCTGCGGTTACGTATTG…
OR	OR_TdChr006.100	ATGCATGATTTAGAATGGGCGATTGGTTTAAATCGCTATGGTCTGAAAATTTATGGCATCTGGCCAGGAATTCTTCTGGAACGAAAAAAAAGCATATGCAGTACTCATGCGTTACCGATGCTATTCGTAATGATGGTAATGCTTTTGGTACCACAAATGTACGCCTTGTATAATGTGATACATGAATTGCCACTCATCCTTGACAACATGATGACCAGCCTGGCTGCTTTAACGTCTTCATCGAAACTTTTCCTCCTTTGGAAACATAGAAGAGATTTACTCCTGGTACTAGAGTCTATGGCGTCTGACTGGAAAAAGTCAAAATCTAAATACGAACAACAAATTATGATAAAAGAAGCACAATTCGGAAGATTGATAACGATAATCGGTTACACCCTT…
OR	OR_TdChr005.3	ATGGGATCAACGGAAATAAACCGTCTCGATAAATCAGTTGATCAAATTGAGTTTGACAAAGCTGCAAGACTATTCTTATGGTGTGAGCGATGGTTGTCGCTAATGGGACTTTGGCCAAAAAAAAATAGAGATGTTTTATTTTGGACACTTTTCATTTACTACGGTTTCTACAAAATATTAGATGGGATTACTCTATACATTGCAGCTGGAAAATCTTTGCAGTACTTCATACACAGTTTGGCATATAACGTTACGTTCATACACGTCTTTTTGCGGTTTTTTGTTCTGAAATTTTATAACACCAAGTACGGCGAATTACTTGAGGAGATCTCTACCGACTACAACGAAGAACTGTACAAATCACCGGAAGAAAAAAATACATTTTTAGAGTACAATCGA…
OR	OR_TdChr005.1	ATGATTCTCGATGTTGTACAAGCACAAGAAAAACTGGACCACTGCGTAACTTTGTTCTCATGGGGCAGATATTTGTTATCAACTGTTGGCCTCATCTACGCAGATTTTATAATACAAATGGACCTGGAACGTTTCATTATGGGTGTATCCGAACTTGCCGGCTTAATGCCGTTATTTTGCATACTTCTGCTTCTTCGATTTCATAGACACTCCTTGGCAACTGTAATAAATGAAATTATGGAGGATTTCAATGTGAAGAAATATAAGACCTTGCAGGAGATGAATGTTTTCATAAGTTTTCACCAGAAAGCAAGATCCTTCTTAACCTTTGTGATTATTAACAATTACATTGCTTGGATTATTTACTTCTTCAAACCGTTATTACATCAAATAACTGAA…
OR	OR_TdChr005.2	ATGACTGTCAAAGTAATACACGCTCAAGCGGACTTTGAGCGCAGCGCTCAAGTTTTTTCATGGAACAAGACGCTCTTATCATGTTTAGGTCTCTGGCCAGCAAAAGCCAGCGATTTTCGATTCACCATAAATTTTGGTTATTTCGTATATCACATGATCCTAGAATATTTGGATTTGTTTCTGTTCATCGATAATTTGGAGCACGTTATTATGAATTTAACCGAAAACATGGCTTTCTCACAGATTTTTATCAGAATGCTGATGCTGCGAGTTTACAATCGAGAACTCGGCGGAGTAATAACGGAGGCAATCAAAGATTTCGAGACGAAAGAGTATACAGAAGATGAAAAGAGTACCTTTAACGCTTATCATGACAAGTCAAGATTTTTAATGAAGCTT…
OR	OR_TdChr005.7	ATGATTCTGTATGTTATTTTGAAAGCTCGCAACGTGGATGACCTAGCAGATAATTTCGTGCTTATGCTATCATTTGCTAATGCGAGTTATAAAATGACAAATATTTTGTTACGCCGTAAAGATTTTCTAGAACTTAGCAGACAACTTTCCGTCGATCCTTTTTGCGCGCGTGATGATGCTGAAGTACGGATCAGAGAGGATTATGCAAAACGAATCAAAAACGGTGTCTTGTATTATGCTTTACTTCTATACGGCTGCAATATAGTAGTTGACCTCCAACTACTCCTAAGTGCTATCGAAGGTGATCTTCAGAATAGTTCATGGCAACCATATAACATGAATGTACCATGTTACTTCTGGGCAACTTATGTACATCACGCCATTGGCTATGTGGCAGTA…
OR	OR_TdChr005.10	ATGATATACACTTTACGTTATAATAGAGAAATTACTGATGTAACAAATTCGTTTAACAATGCTCTTTGCCGTCCTCGGGACACCGCTGAAGAACAAATCAAGGCAAAGTTTGACCAAATTGCTAAGTATACAACACTGATATACGCTTCACTCGTCGAATTCACAGTGTTGATAGAGGTTACCGTAATGACACTGTATTTTTTTGATGGAAAATTATTTCTTCGAACTTGGCAACCTTATAGTATTGAACCTAGAATATCGCTCATTTTAACCCATCTTCATCATTGTGTAGCAATAGTTAACTGTGCAACTGCGCATGTTGGCGTTGATACTTTGATTCCAGGATTAATGCTGCAAATATGTGCGCAACTGAGTATTCTGAAGTATCGCATATCAAAC…
OR	OR_TdChr005.11	ATGTTTATGGATATTGTAATGGAAGCCCGCGGCATTGAGGACGTAATTCAAAACATATTAATGATGCTAACAATGTTCAACGGATGTTGTAAAATGACATACACCTTATTTTATCATGACGAAATTGCCGATTTAACTTTAATTTTGAATGATAAATTGTGCAGCGTTCGAGATACTTCTGAGCAACGAATCAAATCTCGTTTTGAAAAAACGGCAAGGTACACAACGATCTGTTATGCAATATTAGTAGAATCGACAATCGTAATATTAACGATATTACTGTATATAAAAGTTTCGGAAGGCATTTTGTATCTGAGGACATGGCAACCATACGATGTCTCCTCTAACATTCCATTATTCCTTACGTTTCTGCATCATGTAATTGCAATGGCTGGATGT…
OR	OR_TdChr005.13	ATGCTACTTAACAACAAATGCGTTCCTCGCAATTCTGAAGAATCAGCTATTCAAGCCAAATACGAAGATATCGCAAGATCGAATACGGTGAAATACCTGCTGCTGACAGATGGCTCAATTTCTTTCAATACAATAGTAACCTTTATATCGGAAGGTTTGAACGGACGCTTAATGTATCCTGCTTGGCTACCTTACAACCATACACAAAATGTTATCATTTTTTGGATTACTTATATACATCAAATTGTGGGCCATTTTACTGCTGGTAACGCAAACGTGGCTAGTGAGACTCTTATTTCAGGATTTATGATTGAATTATGCGCCCAAATTGAGATCTTAAAATACAGACTTGGCAGAATAACTCGAGCAACAAGTTCCATTGAGAATACAAAAAATGAA…
OR	OR_TdChr005.15	ATGACGTATTTGATTATTCACCGGAGTAAAATACTTAATCTTCAGGAAATATTGGTAAATGAATTGTGCGTTCCTCGATGTATTCCTGAACGGAAAATCGATTACATTTTCTTCGAAAAATCCAGGTTCATTGCAACAAATTATGGAATGTTGGTGCAATCATCGGTGGTGTTCATGGCAATCAGACTTTTCATAGATACACTTCATGGAACTTTACCGTTTCGAGCTTGGCAACCGTACAGTTTATCCTCGCCAACCATATACTGGTTAACATACTTACATCAAGTTAGTTCACATTTTGAATGTGCTGCAATACACATAGGCGCAGATACATTGATAACTAGTCTGACGCTGCAAGTTTGTGCACAATTAGAAATACTGAAATATAGACTTTCCAAC…
OR	OR_TdChr005.16	ATGGATGCAATTTTAACTGCTCGAAGTATAGATGAATTTGCAGAAAATGGTTTCGTAATGTTATCATTTGTAAACGCGTGTTGTAAAGTAACCAATGTTATGATCAAGCGTAGAGCACTTGTTGATATAACAAAACAACTATCGACGGAACCATTCATACCCAGCAATGACGATGAAAAGGATATTAAAGTAAAATGTGACAGAGAAATAAAGACCGGAATATTCTACTATTCGGTACTTCTGTATATTGTTACTACAGTTATGTCGATATTCATGCTTATCAAAGCATTCACAGGAACACTGTTATCCCGAGCTTGGCAACCATACAATATTTCAAATCCAGTTTTATTTTGGCTGACGTATGCTCATCATAACGCAGCTATGATTTCTGGTGCAACA…
OR	OR_TdChr005.19	ATGCATTCGAATAAGAGGGCTACTCGAGAGTTCGTAGTGTATAAGCGAATGCTGTTAGTAGTTGGATCATGGCCTTTGAAAAAGGACAATATCTTTGCAAAAATGTTATTTGGAACGACGCTAATGGCACTGATGAGTATGGTGATTCAGTCTGTACTTGAACTTTCGTCGGATGGAGGAACAATATTAGGGAAAATTGACACCTTCCTGTTCCTAATAGGACCTTCAACGTCATTAACTAAGCTAAAGAATATTCGAAATCATAAGGAATCAGTCAAGAAGATTCTACTTTCTTCAATTGACGATTGGCTTAAGACAACCGACAGCAAAGAAATTTCTATAATGAAGAAAAATGAAAAAATTGCAATTACTTTTGGAAAAGTGTATGCAATTTTAGCA…
OR	OR_TdChr005.20	ATGACCGAATTTCAACCAAATGCAGAGAATGGGTTTGCAGTTTTTGAAAAACTGTTGGGTCTTGTTGCCGTCTGGCCATTACAGAAAAGAAATCCTACTTTTCATCTACGAGTAGTTGTGGTTGTATGGCTGCAGGTGAGCATCATGATACAATCATTCAGTGAAGTATATTTTTATCAAGGGGACATGAATACAAAAATCTTCATTTACATATTCTGCGCAAACACTCTTCTAGCGAATGTTAGATATTTTTACATGCACAAATTCAAGGATATAATAAGTGAAAATGTTAATTTTGTCATGGAGGATTGGGCTACGATAAAAGATGAGGCTTCTTTGCAAATTATGAAAAGCCACGACAAGACCACCAAATTTTTATGCCGAGCCCTTGTAGGAACA…
OR	OR_TdChr005.21	ATGGATTTGCTACCATTGGTTTTCCGAGTTTGCCGATATTGCGGGCTTTGGCATGAGGATCACGAAAAAGCAACATGGAGAAAGTTTGCTGTTAAGTTATTTGTGGTGACCGTATCCATATATGTCGTAGTGACCCTCTTCATCGGGTTGACAATAAATCGTGGTAACGTAGATGACATGACTGACAGACTTTTCGTAACAATGACATTTACCGCCGAAGTTTTTAAAATCATAAACTTCGTGTTCAGACAAAAGTACATGAGGACAGTGCTAAATAAGTTTCGTTCGCGACTTTGCAAACCTCATTCGATAGCAGAGCAGGAAGTAATAGATAAGTATGTTCAGATGGCGACTAAACAGTTTCGGGTGCTGCTGATCATAGGTATGTCAACTGCTTTT…
OR	OR_TdChr005.22	ATGGATTTGCTACCCTTGATTTTCCGATCCTGCCGATTTTGCGGTATTTGGCACGAAGATTATGAAAAAGCAACATGGGGAAAGTTAGTTGTTAAGTTGCTTGTGGTGTTCTTATTCGTATACATTATATCGACCCTCTTGATTGGGTTGGTAGTAAATCGCGGTAACGTGGATGATATGACGGATAGACTTTTCGTTACAACGACGATACTCGCCACGACTTTCAAAATTGTGAATTTCGTGTTCAGACAAAATTATATGAGGGCAGTGTTAAATAAGTTTCGTTCCCGACTTTGTAAACCTCATTCGATAGCAGAACATGGAGTAATAGATAAATATGTTCAAATGGCGACCAAACAGTTTCAGGTACTTCTGGCAATAGGTATGTCAACTGCTGTT…
OR	OR_TdChr005.23	ATGGACGTGCTACCATTAATTTTTCGAACTTGCAGATTTTGCGGTATCTGGCAAGAAGATTACGAAAAGACAACATGGTGGAAAATCATTTATAAGATACTCGTAGTTAGTCTGTTTCTGTACGTCATGGTGACTCTTTTGATCGAGTTTGTAATAACACGTGGCAGTGTGGATGATATGACGGACAGACTTTTCTTAACTATGACGTCTGTTGCTCTTTTCTTTAAACTAATCAATTTCGTGTTCAGACACAAGGACTTGAGGGTCGTGCTGAACAAGTTGCGCTCGAAGATATGCCAACCGCGTACGAAGGAAGAAGCAAAAGTGATAGAACCGTATTTGAGAATCGCGACCAAATTGCATCGATTTTTTCTAACAATGGGTCTTTCAGCTGGTATA…
OR	OR_TdChr005.24	ATGGATGTTTTGCCTTTGAATTTCCGAACCTTGAACTATTGTGGTGCTTGGACAGAGGAGGAGAAAAACTCCTCGATATTGAAAAGCACCTATGGAATAGCAGTGTGGGTAATAGTATTTTATTTCACTTTTTCCCTTATTGCTGGTGCTTTCATGCTCAGTAATATAGATGACTTAACGGAGACTCTCTTCATCACTCTCACCTTTACGCTTTTCTGCATTAAGCTTATCAATTTTGCCGTTCGAAAACAGTCCATGAAGATCTTGTTAGAAAGATTTCGTTCGGATGTTTGTCAGCCGAGATCTACAGAGGAAAAGAAAATTTTGGATAAATACCAGAATGCATCGTCCAAAATATACATTTATTTCGTTAGAGTGGGCGCACCTAGCTGTGCAGTT…
OR	OR_TdChr005.25	ATGGAAGTGCTACCCCGGAGTTTTCATATTTTTCACCATACGGGCATTTGGCGCGAAAACAACGAGGAATCACAAACCATAGTCAAGTCGATTTATAAATATTTGGTACTGATTTTGATTTTTTATTTTTCATTGACGGAGCTGATCCAGCTGTTCAACGCTCTGCTCTACAGCAATGTCGCAGAACTGACCGAGTGCCTTTTCCTGACACTTACATTCTCAGCCTTATGTCTCAAGTTGTTGAATTTGATATTTCGAAGATCCGACATGATACACTTGTTAAACAAGTTTCGATCTTACCCGTGTCGGCCAAGGACTGAAGCTGAAAATGACATTTTGGAAAAATACACCCAGGCCGCTTCGAAGATTCATTTTTTCTTTATCTCGCTGGCATTGATG…
OR	OR_TdChr005.26	ATGCTTTTCACATATAAAGTTCTGGTATGGAAAGTCATCAATTTCTCCTGTCGACGAAAATACTTGCTGGATTTATTAGGAAATTTTCGATCGCCACTTTGTCAGGCTCGAACGTATGCGGAAAAGGAAATTTTGGGGAAATACTCTAAACTGGCAGGGAGAGTGCATATGATTATTTTGATATTTTCATGTACTACTGCTAGTGTGCTTACTCTTGCTCCCTTTTTCGGGCCTAATAATCAACTTCCGTTGAAGACGTACCAACTTCTTGATATGTCAAACAATGCCGCATATTATTTTAGTTACTTCGTTCAGTGTGTCACACAAGTATATTCCACGATCATCAACATTTCCTTGGACACAATGACTTACGGATTTCTGATTTTAGCAACAGGCCAA…
OR	OR_TdChr005.27	ATGTACGTTTTATCGACGAATTTCCAAACCTTACACCGTTGCGGTGTTTGGTATGAGGATGATGAAAAACGCTCGATACCAAAGGCAGCCTATCGAATCTTAGTTATAATTTTGATTTATTACGTCACCGCAGTGGAAGTCATTGAACTGCTCCGTCCTGGAAGCGTTGACGATTTGACAGAAAATTTATTTCTAACTCTAACTTACGTTGGCTTGTGCGTCAAGTGGTTGAATTTTATGTTTCGTCGTGGAACCATGAAACGTCTGGTGACTAGATTCAACGCTGACATTTGCCAACCAAAAACTGCGGAAGAAGAGGTCATCTTAAAAAAATACTCTGACGACGCCAACAAACTCCACGTATTCATCGTTAATTTGGTATTGTTTTTGGCAATAATG…
OR	OR_TdChr005.28	ATGTTTTACCGGAAAATTTTAAAACTCTACTCGTTCTCGGTATTTGAAATTTTGGAGCTGGTTAATCCAAGTGACGTTTACGATTTGACTCAATGCCTCTTCCTAACTTTGTCGTATGTTGCAATGTGCATGAAATGGATGAATTTTGTTCTACGTCGTGACCAAATGTTGGATCTTCTAAACGAATTCCGATCTAAAGTGTGCCAACCTAAATCCATCGACGAAGAGGAGATCATACGAAAATGCACGAGTAGTGCTGTAAAAATCCACAAATTCCTGATCAATATGGCCGTTTTGTCGGCCGTATTTTTCGTGATTCGTCCATTCTCGACAATTGGTCACTCTCCGCTAGAATTACCTATCAAATCTTATCAACTTTATGATACGACAAATACGTTA…
OR	OR_TdChr005.36	ATGAAAGTTTCTCGAAAATGCTTCGAAGGTAAATCGCATTCAACTCTTAACTGGAAAATGGATATTCTTCCCGTGCATTTTAGAACATTGTATTATTGTGGAATTTGGAATGAAGAAGAGAACTCCTCTATATTAAAAACTATTTACAGCATATTTCTCTTCATATTAATTCATTATATGGCATTAGTTCAACTTTGGGCCCTTTTTAATCCCGAGGATGCGAACGATTTCATATCCTGCCTTTTGATAACTCTAACATACGTGGCCCTGTGTTTGAAGTGGCTCAACATTATATTTCGTCGTAAAAAGATGAATGCTATGCTGGCAAAATTTCGAAATGTTATTTGCAAGCCAAATACACCAGAAGAAGAAGCCATTTGGCAAAAGTATTCAAAGTCA…
OR	OR_TdChr005.38	ATGTGTCAACCGCAGTCGCCATCCGAAGTTAAAATTGTAGAAAAGTATTCGCGATCGGCAAGAAATATTCACATATTTTTTGTAACATTGACAATTAGCAGTGGAGTGGTTCTCGCTTTGCGTCCACTGGCTAATTTCGGAAAATCAGAGGTCGAACTTCCGTTTAAGACTTATCATCCGTACGACACATCCAAACATATGTATTTTTTATTGTCTTATGTGATACATGCATTAGCTGATATTTACGGAGCTGGAATCAACAGCAGTTTTGATACAATGTGCTATGGATTCTTAATGTTGATTGCCGCACAATACGAACTTTGTTGCCATAGATTGACAATGGCCATCAACAGTGGAGATATCATGAAGTATACAAAGGACTGGATTGCCCATCATATT…
OR	OR_TdChr005.39	ATGGACGTATTTCCGATAAACTTCCGAACTTTGTTTTATTTCGGGGTTTGGAGCGAGGAGAAAGAAAGTTGTTCGTTCTTGAAATCAATTTACAGAGTATCCGTATTTATTTTAATATTCTATTTTACCACCACATCGGTCATTGAACTGATGAATCCTACCGATGTCAATGACCTCTCAGAATGTGGATTTTTGACTTTATCCTTTATCAATTTGAGCCTGAAATGGTTGAATCTTTTGTTTCGCAAGAAAGTATTGTTAAATCTTTTGAGCAAGTTCAAATCAAATACGTGCCAACCACAGTCACCTAATGAGATCGAAATTTTGGAAAAATATTCACGATCGGCAAGAAATATTCATATATTTTTTGTAACTTTGACAGTTAGTAGTGGAGTTATC…
OR	OR_TdChr005.40	ATGGAAATATTGTCCATAAACTTTCGAACTTTGCAGACCTTTGGGGCTTGGGACAAAGCCGAGGAAAATATCTCGACTATGAAATTAATTTATAAACTAGCCGTAGTTATAGTTCTTCTGTACTTCACGGCAATATCGGTGATAGGATTGCTAAATCCTAAAGACGTCAATGAACTATCGGAACGATCTTTCTTAACGTTAACGTTCGTTGCTTTCCTTTGCAAATGGGCGAACTTGAATTTTCGATCAAATTCTTTGTTTACCGTATTAGATAAGTTCAAACTGAAATTGTGCCAGCCAATAACACCTAGCGAAGTCAACATTATAGAAAGGTACGAAAAAACTGCCAAAAACGCTCACTATTTCTTCTTTACCATGACAATGATAAGCGGAGTAATC…
OR	OR_TdChr005.41	ATGGATATCCTGCCTGAACAGTTTCGAACTTTGGTTTATCTCGGACTTTGGAAAGAGGAAGATGAAAAATTTTCCATTTTTATGTGGATGTATAGGCTTTACGCGTTTATCACATTGACGTATCTCACTGTAATGCAGATCATCGAGATGTTGAGGTCTAATAACGTTTCCGACACTGCTGAACGTATTTTCTTGACTTTATCATTTTTTGCATTCTATACAAAATGGATGAATGTCACACTCAGGCGTAAACAAATTTTGAAACTTAGAAATCGGTTTTGCGCTGACATTTGTCAACCACATGGTCGAGAGGAAAATGTTATTATGGAAAAGACCGATAGCAATGCTATCTGGTATCACTGGGTTCTTTTCAAACTGGCAATAATGTGTGGAATCAGT…
OR	OR_TdChr005.45	ATGGACATTCTACCGGATCATTTTCAAACTTTGATCAAGCTTGGAATTTGGCATGAAGATAATGAAAAATTTTCCATTTTCATGTGGATGTATAGATTGTTCATGTTTGTTTTATTGGCATACCTCACTGTCACACAAACAATCGAGATGTCGAGATCCAGCACTATCTCTGACTCCACTGAATGTACATTTCTGACAATGTCTTATTTCGCGTTCTTCTCAAAATGGCTCAACATAACCTTCAGGCGTAAGAAACTGTTGGATCTCCGAAATAGATTAAGCGCAAATGTTTGCCAACCTCGGTGTACCCAAGAAAAACAGATTTTGGAAAACACCGCGCGCCGTGCCGCGTGGTATTTTTGGTTTTGTATAGTATTAGGCATTTCTTGTGGAATCAGT…
OR	OR_TdChr005.51	ATGGAAACGAATCCAGCTTACAAAGGTTACAATGCTGCAGTAGCCACATGTCGTTTCTTTTTACGATACATCGGAGTCTGGCCTGGGCCAGAAGTAGAAAGAAAAGGAATATGGAAATACTATTTTCTTCTTCCTAGTACTTTAATAATATTTTCCGTTCTTATTCCACAATTCACCATGCTGGTAAAAGTGTCTGGAGATTTTAATGCTACTCTCAAGGTGCTAACAATGGCAACCGTTCCATGTGGAATTGCTTTGATCAAGTTACTGAGCATTCGCTATAATGATAAAGTCTTAAGGGAACTGACTCTCATCATGGCGGAAGACTGGAAGAGTGAAAAGTCTACCGAGGATTCAAAAATGATGTGGGATGCTCTAAAAATTGGAAAAGTAACAGCG…
OR	OR_TdChr005.52	ATGCGCCGACCAACAGATCTTAGCTTCCAGGCATTACTCCTGGTCAGTACTGATCAAGTAGCAATGTCTGCGAGTTTATTAGACGGGAAGCCAGGATTTGACTATGTTGTCGATCTTTGTCGCTTGAATTTGCAAGTAATCGGAATGTGGCCTGATCCACTAGTGCCTAAAACGACATTTACTAGAATTCGTTCAATATTAGCGCTATTTTTCATTCTGTCATTCAATGGTATTCCACAAACAACATTATTAATCCAGATTTGGGGTAACCTCGAAATGATGACGGAAATCATCGCTACGGCTAATGTGCCGTTCATTATCGCAACAATAAGGCTACTTACGATACATTTCAACAATGATGTGGTGATATCACTAATGCGTCACATCTACAATTCCTGG…
OR	OR_TdChr005.53	ATGGACATTCGTTATAAAGTTTCTTACACGATACTGCCTGCTAATCAATTTTGCACAATTTCCCACGTTTTTATAATCGACGAGTATGCGCAATATGCAGAGGATCTGAATAATCGTTTAGTTTTAGTTACATTGTCGAGACATCAGCATCAATCTAAAAGTATGGGCTCTAAAGGCATCGTGTATTTCGAGAATGTGATAGCTGTTCCTAGAATTGGCCTTGGAATTGTTGGTATCTGGCCAAATCCCGACTCTACCACCAACAGCAAAGAATGGTTGGAATTTCTTAAATTTTCGATATCAGTAGTTCTGAGCCTCCTTTTTATCAACGCTGCTCAAACGGTGCAACTGGGCTTGGTCTGGGGAGATTTCGATCGTATGTTGAATATTATCTCAATG…
OR	OR_TdChr005.56	ATGTTAAGGAGCAAGAAGGGCTGCATTCTCGCCATAATCTTGATGGCCACGGCTATAATGACGTCCAGACCAGACGCCTTGTTATTCGGCGACGTTGTTGTGGTCCTTCGCGGTTCTTCAACTGTAAAGATTAGCGGCGTGATAGCAGCACCTAGAATAGGTCTAAATATAGTGGGTATCTGGCCAAGTCCAGATGAAACTACCACTGCTGAAGATTGGATGGCGCTTGTCAAGTTCACGATGTCCATCTTAATAGGCATCTGTTTTATCAACGCTCCTCAAACTGTACAATTGGGTATGGCCTGGGGCGATTTCAATCGTATGACGAACATCATTTCCATAGCGAATCTTCCAATAGGCATTTCCTTATTAAAGATGATCGTTCTACGAATCAATAAA…
OR	OR_TdChr005.57	ATGGTATCCTTTACTCCACATGTCCTCTACGACTTCATCACCGATTGCTTTCCAACATCAAGGCTTTTGATGAACACCACCAGCGCTTTCTTTGCTGCTTGTCTCCTCGCCATGCCAACGGATAACAAGACCGGCACGACTTGGGATACTTCCAATGGGCCGAAGCAGAGACCGCTCTGGGATTTTGGTTCGTGTTGGATATTTTGCTTCCGTGATACCTGTTACCGGCTCTGCACTTCCATATCAACTACTTGGGGACGTGTCTGGTCGAAGAGTCCAACAACAACTCCATGGCTATGTCTGAAGCCCGAATTGATATGGACGTATCCATTGACTATCTCTCGACCGGTTAGACTCCCAAAGCCATTACCCGACAAAAAGGGACTGAGAGGACATTTG…
OR	OR_TdChr005.59	ATGCTCATTTCTCACCTGTGTGGACAATTAAGACATTTGCCCTGGGAAATAAAGAATTTAGAATCGCACCCTGACGAAAAGAAAATTATGGAAAAGCATATCGAGATGAAAGTGGCGCAAATCGTTGTACGACATGTTCAAATAATAAAGCTCGCTGAGACGGTTGAAAATATGTTCAGTATGATGTGTTTGATCCAAGTGGGATCTTTTCTATTTCAGTTTTGCATGCAAGGCTTTCAGTTTATATCATTATTAATCTCGGATGACGCAATGCTATTTCAAGCAGCGTTTATGATGTCGTTTATGACGTATATCCTGACGCGTCTTCTGTTATTCTGTTACATAACGGAAGTTCTTGTTACAGAGAACACATCATTGGCATTCGCCGTATATCATGCA…
OR	OR_TdChr005.61	ATGGAAGGACAGGAAGGTTTTAATTTCATCATTGGCCCATGTCGAGCCAATCTAGAAGTACTAGGGATATGGCCAGATATCTACCGCAAAGAGTTGAATAGTTTGAAATGCAACTTAAAAGTTTTTTTGGCTATATTCTTTATGGGAGTCTTTTGTATTATTCCTCAAACGACGAAACTTATTCTTGTTTGGGGTAATTTGGAGCAGATGACAGATATCATTTCCACAGGAGACTTGCCGTTTTTTGTTTCGATAACAAAAGTTGTGGTACTATATTACAATAAAAAAGTTCTATTATCAGTGCTAATTTTAATTTGGAACTGCTGGAATAAGCCAAGGAACTCGCAAGAACTCAAAATCATGACAAAAACTGCAAAGACATCGAGAAAACTTGGAATG…
OR	OR_TdChr005.62	ATGGAAGGTTTCGATCATATGTTTGGACCATGTCGTGTAAATCTTCAAATGCTCGGTGTTTGGCCAGACAGGAGTTGCAGCAAGATAAGCAAAGTAAAATCGAGAATAAACGTCTTCATATCTCTAACCAGCATGGTAATATTTTGCGTAATCCCCCAAACAATCAAACTTTTTATGGTTTGGGGGAATTTGGAAGAAATGACAGAAATTATTACCACGTCTGATTTACCCTTTCTTGTTTCCATCACCAAAATTATCGTTCTTTATGCTAACAATGAAGTTCTGTTATCGGTCTTAAGCCTGATCTCAAATGACTTCATGAACCAGCGAAGTAAACAGGAGTACCAGATAATGAAGCAAAGCGCCCAAGCATCTTGGAAACTGAGCATGGTGTGGTCA…
OR	OR_TdChr005.66	ATGATTTCGTTTTATAATATTAAAAGAAAGACTTATTTGTCGATCACTGGATGTCATCGGCTTATCATCGAAGACTCTCCTAACGACACGCCTCATGAAATGTCTACGGAACCGCCGTCCACCACAGAGAAAGTCCAGACTTTCGACGAGTCTATGAATGTCATCAAAAAGTCAATGGAGGTTTTAGGAATTTGGCCAGAACACTCAAAAAAGAATATTTATTATTACTTGAAAAAACTCTCAGTTTTTGTGCAATATGCTACTATGCTTGGATTTTTAATTTCACAATGGGGCGATCTCTACACTTCGTGGGGCGACATCGACGCTACGGCTGATAATTTAACGAACCACTTTATCACCATTAATGGTGTAGTTAAATTATCGTTTGTTGTTCTTAAG…
OR	OR_TdChr004.2	ATGACATTAACTGGAGAAGATATTTATTTCGAGACGTGTAGATATAGTCGATATATGTTAACGGTATGTGGAATTTGGCCGTATCAAGGTCAATATTCTACTTATTTCTTCAGATGTTTCTGGATTTTACAACATACTACAATTACCTTATCAGAGTTTATGCGAATCGTTGAAATACGTGATGACATCGATCACGTTTTACAGTGCGTACCACCTTTAATGTACAACGTGATTTGTATTGTAAAGTTCTCGCACTACTTCTACAATATTGACAAGATGAAATATGTTCTGGACCTAATAACCAAAGATTGGAATAGATTATCAGGCAAAAAGGAGATATCGATCTTAACAGCATATACCAAAAAAACAGCATTTCTAGCAGACGTATATGTGTACATG…
OR	OR_TdChr004.3	ATGAAATTTATTCTGGACCAAATAACCAAAGATTGGAATAGATTGTCAGACAAAAAGGAGATATTGATCTTAACAGCACATACCAAAAAAGCAGTATTTTTATCAGACGTATGTGTGTACATGGCTATTACGATAATATTTCTGTACATGTTTCTTCCACTATCGCCAGTTGTCTTGGATATCGTCACACCAATGAATGTATCAAGAAATAGAAAACCGTTGTACGAGGTAGAATTCTTTGTCGATCCGGAAAAATACTTCTATCCTATATTATATCACGCGTATATTACCGCCTTAGCACGAGTAACATTGGTTAAAGGAGGGGATGCAATAATTGCGAGTTGCGCTCAACATTCTTGCGGTGTGTTTGTCGTTTTAAGAATAAGCTTAAGTGTCGGA…
OR	OR_TdChr004.6	ATGAAAATTATCACAGAACGCCGAGCAATTATTTCTTTTCTAAATACGTTCGTCGATGAACGATGGTATGATTCGAAAAACCGGGAAGAATGCCAGTTACGACTGAAATACGATCAAGAAGCTAGACGAATTACATTAATTTACGTCGTTGGAACAGCTCTGGGTCTTGGATCCAGAGCGCTAACTCCATTTTTTAAATACCAAAATGCGTTTGACTTGCCGTTGGGTATGTGGTGCCCATATGATAAATCCAATACTCTTAACTATTTTATAACCTATATCCATCAAGTAATTGGCGGAGTAACGTCGGTTTTGCTACATGTTGGTCTGGATTGTTTTTATTTCACGGTTTTGATAGAAATGTGTCTACAGTGTCATATTTTAAAACACAGGCTTAAA…
OR	OR_TdChr004.7	ATGAGCATTCTTCATATGGGTTTCAAAGATCGATGGCAAATTCCTCGAGATATCATGGAAGAACAAATTATATGTGAATTTAGACAGTCAGCAAGGAAGATGCATGTCATTTACATAACAGTATTAACTTCGGCGGCATCACTTCTAACTATTTTACCAGTTTATATGAAAGCTGGCAATGAGATTAAACTTTTAGCCGAAGTTTCTTTTCCTTATGATGTTCAGGTTCCCTTATATTTCTGGTTGACTTATTTTCATCAAACAATCTCGCTCTTCTTTCTAAGTTTTTTGATTCTCAGTTCGGATATATTACTTTCTGCAATTTTATTACAAGTATGCTTGCAGTTGAAATTAATGAAACACAGATTAATACAATATAAAGAACTTTCTTCAGAATAT…
OR	OR_TdChr004.8	ATGATCTTTGAAAAAAGTTTCGAGCATAGGCTCCTCCCAATACCATTTTTCTTGTTGACGTGTACAGGAGCATGGTGTCCATCAGAGTTCGGACCTGTAAAGAAAGTAATTTATTACACATATTCTGCAGTCGTTGGCATTATACAGTTTACTTTTATTGGAGAAGTACTAGCTTATGTAATAGATTGCATAATACAGAAACGATTCGAACCATGGCCAATTTTTATACTGACAACTATTACCAACAGTTTTTACAAGTTGATCAGCGCCGTTCGTAAAGATTGGATTTTAACACATATAATTGAAGGTTTTAGTGAGAGGTGGCGAATACCTCGAGATTCCGAAGAAGAACAAGTTATGAAAGATTCATCCCGAAGTTCAAGGACAGCGTATATTTTG…
OR	OR_TdChr004.10	ATGGTGTTCCTGTACGTTTACGAATGTATCACATCCAAAAGATTTGAGCCGTGGCCTCTATTTATACTGATGACACTTAGCAATAGTATTTACAAATTTATCAGCATCTCCCGTAGAGAATGGATACAAACCATTCTGGCTATGGGGTTTAGCGAAAGATGGACAAAACCACGAAATTACAGCGAGGTCGAATTGATGGAAGATTTTAACAAAAAATCAAGGGGTGTGCAGGTATCCTACTTAGGAATGTTTTTATTCTCGTCGATGCTTAAAACTGTAGTACCTGTCTTCATGAATGTCGAAGAAAATTCGAATCTTCCTGTGGAGACTTATCTTCCCTATGATATTCAGGTACCCCTTTATTATTGGTTAACTATTTGTTATCAAGGTGTCGGAGCC…
OR	OR_TdChr002.3	ATGTTTGAGTATTTTGATAAGTATAATAAATTACGAATTTTGCCAGTTTCGGGTCTTGTGGTATTGACAGCCATCGGAAAGAAACCCACGACGGTTCGAAAACAGATTTGGTTAGAGTTAGTTTTAGGAACGTGTAGTATTCCAACCACTTGTTTAATCATTCCGCATCTTACATCTCCCATGATATTAGGTAACGATTGGTTGAGGAAAAATGGTGTAGTGATTGATTACCGTGCGTGTCAAATTTTAATTGGTAATGAGTTAATTGATAAAAAATTCATTGCGTTTTCGACAAAGGCGCCAGAAAGGGTAGTTTTTTCGCAAGAGGAAGATGTAATATTTGTTCAAATCATTAGGTGTGTTAATAATTCTGCGATTGATTTTATTAATGAAAATAAA…
OR	OR_TdChr002.4	ATGGAGACAATTAATAAAGATATAGAGCCAATTGTTAAAGATGGGATGGAATTTGTGGATAGTTTCTATTTTCATCTTAATAAAAGTTTATTGGAAATTGTGGGACTATGGCCTTATCAAAATTCCGTACGCAAATGGCTGGCAAGACTCTTTTTCATGTCTATGATGTCTTCACTCGCACCACTTGTAATCTTACAATTTATGGAAGCCATTAAAAACAATTCTATTGCTTCATCATTTGAATGCCTAAGTTTTTTAGCATATCTTTTATCCTGCGTGATGAAACTTGTATGTTCCATCCTCAGTGAAAAGCAGCAAAAGTCTATTATTGAAGGAATGTGTGAAGACTGGAAAATAATAACTGATAAAGATGAAGTTGAGGAATTAAAACGATATTCA…
OR	OR_TdChr006.1	ATGGATGCAGCAAAAAAAGATGATCTGGCAATGGAGAGCGAAATTATTCCAGGAGCCTTTCTGATCTATAGGGCAGTTGGATTCTGGTACCCTATAGGATGGCCAGTAAATAAAATACTAGTGTACAATGTTTATACTGGTATAGTAGTTATTCTACACATCAGTGCTATTCTTGCCGAGTGGCTTTATTTCGTATTGGGCAATAATAATTTACTTGATGCTCTTGTGGACGATATTTGTGTTATTTTACCAGCTTTAAACAATGCGATAAAAATGTTTGCATTGCTAATAAGTCGTCAGCAGGTAATAATGCTGATAAATACATGTTACGATCAACGGTGGTATGCAAATCGAAACACTGAGGAGGTGCGGATTCGACGCGAGTTTCATCGTGCAGCC…
OR	OR_TdChr006.11	ATGAAGAACGAGCAGCTGGAAACAGTATGCAAGATTATGCTTCCACTTGTTCCACTTGCACGTACGTGTCTAGTCTGGCAAGGCATCATGGATGATGAGTTTTGTGTTATTTCGAATTTACGAGGGAGAGGTTCAGATTTCAAATTACATGTATCAAAGCACAAAGATATGGAGATTGAAAATTCTATAAGTTTCCAATCTGTATCATCAATTCACGTAAAATTGCTGCGAATGTTAGCTGTTCTTCCATTTAACGGACGAACCAATGAATTCATTGGTACAAAATTATATGCTTCTCTGTTCATAACGTGGACCATCTGGTACAGTTTTCTGATGATCAGTAACGGTGTCGCCAAATTTTCCCAAGGAATAATCGAGGTCGATTACATTTGTGAAGCT…
OR	OR_TdChr002.10	ATGCTACAAGTCCTTTACCGATTGGATGACGGAAAAAAAATAAAATCCGTCAGTGAAAAGTTATTAATGGGATACTTTCCAATGTTGTCTTTGAAGTTGAAATCGTCTACTCTGTGGGCGCAATTCTCCATGCTCAAATGCATGCTGTTCAGAGAGAAAAATATTGACATGAGTACCTACAAGAGTTTGCACATATTTTTGAAGCACATTCACATCAATAACAAGCCCATAAAATCAGCCGTACTGACACCCGAACAGATTCATAAATTCATCGAGGAAGCTCCAGACGATGATTACTTAGCAGATAAGGTCGCTGTTATCTTCGGTATGGCAGGTGCTTGTCGCAGAATGGAATTGCATAATTTGAAACGTACCGACGTCCAAATGGTTGACTCTGTT…
CSP	CSP_TdChr001.1	ATGAAGTGCATAATTCTTATTGCTTTGGTTGTTATCTTCGGTACTGCACTTTGTCAAGCTCAAAGTGCAATGATCTACAGGCACATGAATTGTGTTCTCGATCAAGGACCTTGTGATCAGATTGGCTTTCAAATAAAAGCTATGTTGCCGGAAGTAGTAAATAATCAATGCAGGCGCTGTACTGCCCAAGAAGCCAATTATGCCAGTATGATTGTGAATTTCGTCCAAAAACGATTCCCACAACAATGGAGAATGATACAAGAACGCTACAGGTGGCAACGTTAA
CSP	CSP_TdChr001.2	ATGTCTCGATTGATCATCATCACATTCTTAATGGTTGCGTCGTTTTGTGGAATTGCTATAGGTGCAGTAGAATTGTATTCTGACAGATACGACTACATAGATGCTGGACCAATTTTAGCAAATCCACGCTCTAGAAGTCTCTACTACAATTGTTTCTTGGGAAATTCACCGTGCGCCACACCTGATGCCAAATTTTTTAAAGAGACTTTCCCCGAGGCACTAGTAACTAAATGTTCAAAATGTACCGCAAGACAAAAAGTCAACTTTGAAAAAATTGTGACTCATTACATGGAGCATGAACCGGATAAGTGGAACACTATTCTAACGAAATCCATCGCGGATATTAATAAGCCAAAACCCAGCAATAGAATGAATAGGAGTTAA
CSP	CSP_TdChr001.3	ATGGCTTGTGCAAATATGTTTTCGTGTTACAGTGTCTTGTTAATTATCTTACTTTGCGGCGACTTCGTGGCAGTGAATGCTGATGATAAGGAATATTACTCAGATGAGTTTGATAATCTGGATGTTAATGCCATATTAATGAATGATGCGTTGCGGGATGAATATTATGGTTGCTTCATGGATACGATGCCATGCGACCATGAAGGTGCATCATTTTTCAAAGCAAATATTCCGGAGGCGATTGTCACTCAGTGCAGGAAGTGTACCGAGAAGCAGTTAGAGATGTTTGGGATCGCTGTCGAGTGGTTCGTCGAAAATCGTGAGGCGGAATTTCGTGCTCTTATGATGAAATTTATTGCGGATGCCAGAAAGGCTGGATTGACTAATGAGAATTCTGAG…
CSP	CSP_TdChr001.4	ATGAGGAAAGTGTTAGTCATTTTTGTAACGTTATTCACTATTCTGGTGGCACAAAAAGAACCGGCAGTAGACTATTATCCAGAAAAATGGTCCCAAATTGACTTTAAATCTATCATTGATAATAATCGACTTTATGAGAAATATAAAAAATGTTACTTTGGAGAGGAGAAAATTGGATGTCCACGAGTCATAAAGGATGTGCAAAAGGTTATACCGGAGATTATCGACACGATGTGTGCTAGATGCTCACCCGAACATATAAAACTAGGTAAAGCTGCTGCTAAATATATGTGCGAAACTCACAGAGAAGACGTTGACAGGGCGTTAAGACTCAGAGATCCTGATGGTACTATTCTCGCACGTTTCGAAGCCAAATTTGGAAAATTGGGATGTGATTGA
CSP	CSP_TdChr001.5	ATGAAGAAATACGTACTTTTCGCTTTTCTCGCGGTCGTAGCGTGCGCTAGTGCTGTCGAGTACACCAGCAAGTACGACCACATCGATATCGATTCCATACTCAAAAATGGTCGAATACTTCAAAATTACATCAAGTGTTTACTTGAAAAAGGAGCGTGTACCGCAGAAGGACGAGAACTTAAAAAAACATTGCCGGATGCGCTGATGACTGGATGCGCCAAGTGTAATGAAAACCAAAAAACTTCGGCAGAAAAAGTCATCAACCACCTGAGGACACACAATCCACGGGATTGGGAAACGCTACTAAACAAGTACGATCCACATGGACAGTACAGGAAACGTTATGAAGCTGAACAAGGCAGATCGCTGTAA
CSP	CSP_TdChr001.6	ATGAAGACTACCATGATTTTGTTCGCTGTTGCCCTTCTCGTTGCCACCTCGACCGCGCAGCAGTACACAACCAAATACGATAACATTGATGTAGAACAAATTCTTCACAATGAACGACTATTGAAAGCCTACATCAACTGCTTGCTGCAACCGAATGACTCTGTAGCCAAATGCACTCCCGAAGGACGAGAATTGAAACGAGTCCTTCCCGATGCTTTGGAAACCGAGTGCCAAAAATGTAGCGAAAAACAGAAGACAGATGCCGAAAAAGTCATCGCTTACCTATCGAAGAACAAGCGTGAAGACTGGGAAAAAATCCTTGACAAATACGACCAAAAAGGAATCTACCGAGCGAGGTACAACAAGGAAGCAGAAAAACGTGGCATCACAGTTTAA
CSP	CSP_TdChr001.7	ATGAAGACTCCTATCTTTTTGCTCGCATTAATATGTGCTATTGTCGTGGCGGAGGAGCAAAAGTATACTACTAAGTACGACAACGTCGATGTTGATGCTGTGCTCAAGAACGAAAGGCTTCTTTCAAACTATGTAGGATGTCTCCTCGACAAGAACCCCTGCACTCCTGATGCAGCAGAACTGAAGAAGAACCTTCCGGATGCCTTAACGAACAACTGCGCTAGCTGCAGCGATGCACAAAAGGTGATAGCCGACAAACTCGCCCACCATTTGATCGATCATCGAGAAGGCGATTGGAAACTTTTGGAAGAAAAATACGATCCGTCGGGAGCGTACAGAGAACGATATCTCAACGAGAGGGAAGACGAATCGAAATAA
CSP	CSP_TdChr005.1	ATGAGAAATTTTGTTTTGTTTGTAGTGTTAATTACAGTCGCGGTATGTTCCTCGGCTACAAACGATGAAAAATATTCTGACAAATATGACTACCTCAATGCGGAAGAAATTTTGAAAAACGACCGGTTACGTGATCAATATTACAACTGTTTCATGAAAAGCGGACCCTGCAGAACCCCGGATGCCGTCTTTTTCAAGGATATTTTTGTAGAAGCGATCGTAACCCAATGTAGAAGATGCACTGAAAAACAGAAGGAGAGTTTAGATATTATTGCTGAATGGTACACCAATAACCAACCAGATAAATGGGAAGCTCTCATTCGATCACACGTTATAAAGGAATAA
CSP	CSP_TdChr006.1	ATGAGGAACTTCGTTTTGTCTTTTCTGTTGGTAGTTTCAGCAGCCGCTGTCTTTGCCGAAGACAAATATTCTGATAAATTTGACAATGCTGTGGACCCACAAAAGATTTTAAACAATGACGAATTACGTGAACAATACTATGCGTGCTTCGTCGGAACTGGACCCTGCAAGACTCCAGCCTCTGTTTATTTCGCAGAAATCTATCCTGAAGTAATCGCCACCAACTGCCTGAAATGTACCGACAAGCAGAAGGAGAACCTCGGAATAACTCAAACTTGGTACAAGAAGAACCAACCTGAGAAATGGCAAACATTTATTCAAGTTCTTACAGAAAAATATAAATCTAAAGTTTAA
CSP	CSP_TdChr006.2	ATGCGTAGATTATTATGGTTCGGAATATACGTTACACTAGTGACGATGACATGTGCTCTACTATTAGTTCAGAAATATTCGAATGAATACGATGACCTAGATGTACATGGAATTTTGAGTAATGAGACTGAACGAACCCACTATTATGACTGTGTAACTGGCAAAGGAAAATGCGAGAGACCCGCAGCCAAATTTTACAAAGAGAAACTTCCAGAGATGTTGGCAACAGACTGTATGAAATGCACCGACAAACAAAAAAGCAACTTGAAAATAGGGATAACGTGGTATCTGAAACATCAACCCAAACAATGGCAGGTTCTTCTTCAGCTTCTATTGCGTATTCATGCAGTCAAAATATTTTAA
CSP	CSP_TdChr006.3	ATGGCAAGAATAATATTATACTCTGCGTTATTGTTTGCATTTGTGCTAGGAGCAACTGCAACTTACGATAGTAGATACGACGCTTCGTACGATATAGATGCAGTTTTGAGAGACGATACGTTGAGAGAACAACATTACCAATGTTACACACGCACCCGGCCATGTCAAAATGATGCAGACAGATATTACAGCGAAATCTTCCCGGAAGCTGCAGCAACTAAATGCCAAAAATGTACCAGAAAACAAAGAGAGATATTCCGAAAATGTAACCAGTGGTACGTCAGATACGAACCTCAAAGATGGCGTTCCCTTGTTGAAGTCAACTTGAGGTTATTCGGCGGTCATGGTGGCGGCGGATTATTGTCGATTTCACTCAATTTGTTCTAA
CSP	CSP_TdChr006.4	ATGAAATTAATAGCAATCCTCACTTGTGTGGTAACGGCCACGGTGGCAATAAAAATAACCCTTGTTTTAGAAAAGTATTCTGATCAATACGACGATTCTCTCAACGCGACAGAAGTTTTGAATAACGACGATTTGCGACAAGAATATTATTCTTGTTTTACGGGCACTGGGCCTTGCAAGACACCTGTTGCAGTTTACTACAATGGGAATTTTCCAGAAGCAGTTGCAACAAATTGTTTAAAATGTACGGAAAAACAAAAAGAAATGTTAAAAATTACTGAAGAATGGTATTTGAAAAATCAACCAAATCAATGGCAAAGCCTTATTCAAATTCTCTTAATCAGGTATAGGAAGAAACCACCATCATAA
CSP	CSP_TdChr006.5	ATGAAAAAAGTCGCTTTGTTCGTCATTTTAATCGTTGCAGTTATAGCATACGATGAACAATATGATATTAAAGATCCGCAAAAAGTTTTAAACGACGAGAAGTTACGAAACGAGTATTTTTCGTGTCTGCTAGGAGACGCGCCATGCATCACTCCTGATGCTAAATACTTTCATGACATAATTCCGGAAGTGATTGTCACAAAGTGCTCGAAATGTACGGATAAACAGAAAGATGTTTTAGGTATAATTAAAAAATGGTACACTGAAAACGAACCTGAAAACTGGAATAAGCTTGTACGTATTGCTAAAGAGAGGTACGACAAGGAATTCAACTGA
CSP	CSP_TdChr006.6	ATGAGGAACTTCGTTTTGTCTTTTCTGTTGGTAGTTTCAGCAGCCGCTGTCTTTGCCGAAGACAAATATTCCGATAAATTTGACAATACTGTGGACACACAAAAGATTTTAAACAATGATGAATTACGTGAACAATACTATGCGTGCTTCGTCGGAACTGGACCCTGCAAGACTCCAGCCTCTGTTTATTTCGCAGAAATCTATCCAGAAGTAATCGCCACCAACTGCCAGAAATGTACCGACAGGCAGAAGGAGAACCTCGGAGTAACTCAAACTTGGTACAAGAAGAACCAACCTGAGAAATGGCAAACATTTATTCAAGTTCTTACAGAAAAATACAAATCTAAAGTTTAA
CSP	CSP_TdChr006.7	ATGAGGCATTTTTTGTTTAGTATTTTCGTCAGCTTTGCCTTAACCGCGATCACTTCCGCTGGACCAATTGCAAAATACTCTTCTGAATATGATACTCTTGATGTCAACGATATTTTAAATAACGCCGAACTTCGCACGCAGTTTTATACTTGTTTGAAGAAGAGTGAACCTTGCAAAACACCACAGATTACATTTTATGGAGATATCTTTCCAGAGTCAATTACAACGTATTGCATGAAATGTACGGAAAAACAAAAACAGACTTTGGATGCAGTTTCCAACTGGTATATAAAAAATGAACCAGAAAATTGGGAAGCCCTCGTCAAGATGTACAAGGCAGGATGTTGA
CSP	CSP_TdChr006.8	ATGAAAAGTATCATATTGGTTGCCACCTTGGCCCTAGTCGGCTTGTCGGTTGCTGTTCCTCCTAAGGAAATTGAAGGAAAATACAATGATATTTATGACTCTGTTGAAGTGGAAAAAATTATAAACGACGAAAAATGGCGTAATGAGTATTTTGAGTGTTTAGTTCGTGACGGCCCTTGTGTTACTCCTGACGCTGCATTTTTCAGAGAGATACTTCCAGAAGCCATCCAAACCCAATGCGCAAAGTGCACTGAGAGACAAAAGTACATGCTTGGTTACATTGCACAATGGTATGCTGATCACGAGCCTGGTCTATGGATTGAACTTATCGACAAAGTTCTTCAAAGGTTGCCTCATAACTAA
CSP	CSP_TdChr006.9	ATGCAGTTTCATTTTTTCATCGTATTATTGATTTCTGCTGTAGTTACGATTCCTTGCAGTGCTCAAGACAGATATACCGATGAATTTGATAATATCGATACGCGAGCGATTTTGAATAATAAAAAAATGAGAGAACACTACTATTTCTGTGTCTTAGGAACTGGGCCTTGTGATATACCTGCCGCAAAATTTTATAAAGAGGTGTTCGCAGAAATGCATGCAACCAATTGCCGGAAGTGCACGAATAAACAAAAAGAAACTGTTCAGTTAGTTAAAGCTTGGTTCGAAAGAAGCGATCCAGCTGAATGGAAGAAGTTCCTTAATGTTATGGAAGACAGACATCGAAGAAGGCGCCCAAGAAAATAG
GR	GR_TdChr001.1	ATGAACTTGGGCTCTATTACGTTTCACCAATCTGTGAAGTACCTTTTCTATTTCTTCAATTTTATGGGACTATCAGCTATCAATGCCCACGAAGAACAATTTATCGGAAAAAGGACCGAGAGCAAACTTGTTTTTGCATTTTATCGAAAGACTATAATACCAGTTGTTGGTGTCTTAATATTGATTCTAGTGACCAATAGTATAGTTTTTGGTTTTTATGCAGAAAAGGGTTCAAATATGTCGTTGTTCGAAATCATTGACTTATCTCAAGTAATATGTCGCCTTGTATTTTCAACTTTTGTAATTTGCAGTTATTGGCTACGACGAAAAGCATCTGTCGATCTTTTTACAAAACTGTTCGAGATCAGAAGTAGGTTGAAAAGCATCACTCATTTTTCC…
GR	GR_TdChr001.2	AAGTATTTAATATATGTCTTCAATTTTCTTTGTTTGTCAGCAATTAGTGTTCGGGAAGACAATGTAATGGAAAGAAATGAGCCAAAGTTGGACTTCGTATCTGCAAAACTTATCGTACATGTAGTTTTTGTGATTATTGCAATATTATATACAAATGGTGAAGCCTGTTCGCATTATGCAGCAAAAAGTGTTGATATAACATTTTATGAAATCGTTGACTTATTCCAAGTGATTTGCCGTGTTGTGTTTGCACTTTCAGTCATTTCCAGCTTTTGGTTTCGAAGAAACTATTCACTCTATCTTCTTCAGGAAATTTTTGCTATAAAATCCAGGCTAAAAACCATCACGAACCTTTCATATTCGTACAAGAACGATGTTTTTATTTTTTTCGTAAATGGA…
GR	GR_TdChr001.3	ATGAGCAACAACCTTAAAACGTTGATTGGTAATAACATTGATTACGTTTTATTTTACTGGTTCAAATTACTTGGACTTGCAACTATATCGATAGTAAACAAGGACGAGTTATCGATCGAAGATGGTGAATATCCCCGTGAATTCGAGTATTCTCGTGCTGGTCTCATTTATAATGTAATTTTAATTATACTCTTCGTTCCCACTTCATTTTTCCATTTCTTTCGAATGCGTCACCCAATGCAGTCGGTACCCGAAATTTTCATCCATTTAAAAATAATAGGTACTATCACGATGGCTTACTTATTAATCAAGTACTGCTCGAAGCAAAAGACGTTTCTTGATTTAGCAAACAAAATCTTCGAAAACGAACTGACAGTAAAGCGACTTAGTAGTGATTAT…
GR	GR_TdChr001.4	ATGATGATGCAATATCTGTGTTTCGTAAGACTGATCAAAGGGATGATCGCAACTATCAATGAAGAATTATTGAAAATGTTAAAAAATGAGTCACACGGCATAGAATTCAAAGATAATTTGGAATCTAGTGGGAAGAAACAAGTGATCGTTCGGTTATTAACATTACGTGAATCCCATGAAAATTTGTGCTCATTGTCAGACGATGTGTCAAATTTTTATTCTGTTATTAGCTGGTTTTGCATTCTTCGTATATTCATAATGATGATGTTGTCTCTATATTTTTGCTTGGCACCAGTAATGACAAACGGCTCTATACCATTATCATTACAGTGTTTTGGATATACGTGGGGGTTTTCAGAATTCTACAATCTAATTCTTTTTACCAGATGTGTTACCGAA…
GR	GR_TdChr002.1	TGGATGAAATACTTGTTCTACATTTTAAAATTTTTTGGTCTTGCACCCTTCAATGCACGAACTTCTTCGGCGGATGCAAAGAAAACGAATTATCCAGTGACATTCGAATACTCGTGGAAGGGTACTATGTATAGTATTTGTTTCATGTGTGCACTAATAGGTACGAATACTTACGATTTACCACAAGCTTTCAATCAAAGATATGAGGGAAAAATGCCTATGTACGATATAATTGACGTCTTCGTGGTAATGTTTGGAATGGTTTGTGCTATTGTTATTATAATAAACATCTGCGTACAACAACGAAAAATTACGGAAATCTTAAATAGTATGTGTTATTGTATTCGTCTTTTACAATATTTGAACGTCGAATGTATACAATTTCATCATATTCCAGTG…
GR	GR_TdChr003.1	ATGACCATGAATGCTTGGACTGAAACGAGTGGTGAAACGAAAAAAGGTACTGGAACCAAAAGAAAGAAAGCACCAGATTCATTGCGGAGGAGTGAAAACGGCAGAGACGGGACTGAAATTGGTAGATCGGATCTTTACCAAGCTCTTACACCAATCTACAGGCTTAGCAGAGCTTGTGGATTATTTCCTGTTACTTATTCAGTTAGCAAGACTGGGAAAGCCAATAGTCACTTACATTCACCAAGCATTATATATGGCATATTCTTGATAATATTGCTCATGGGAGCGATGTGCTGGGGATTATGGCGAGACTTGCATAATGGATGGGAAAACAGCACTCGTTTATCCTCAGAAACTGCGATATTAGTAACTTGCAGCGATGTCATGGCAGTGATTAGT…
GR	GR_TdChr003.2	ATGGAATGTCCTGGTCCTTCTGGGCTCTCAGGGGCGAAAAAACCCAAAAAGAAAGAACCGAGGCTGACATACAGTGAAAAAATTGAAATAATTAAATTATTGGACGAAAATAATAAGCAGTCTGATGTTGCAGAACGGTTTAATAAAAGTCAATGCGCTATTAGTCGCATATATGCAAAGCGACATCAAATTCTTCAAAATAAGGACATCCTAGAAAAAGAAAATATATCCCTGAATCGAAAAAGATTTTCTGATGTCATTACCTCCGACAGGGAACACAAACTCGTCCACTGGCTCAACCAAAATCAAGCTGCTGGCGTACCAATTAACGTATACGACATGGAATTAAATGTTACATATAATTTCAGGCTCTACAGACAAAATATGTTGCGGTCTCTT…
GR	GR_TdChr004.1	ATGTTGCGGTCTCTTCTTGTACTTACAAACCATCCTCAAACAGTTCCGAAATTCATTAAAGAAATGAATATTTATAAGTGCATAGTTTACTGCAACCAAGCATGGAACGCTCTCACTGCTGAAAATTTGGCAAATGCATGGAGAAAAATTTTTGGATCTGAAAGAGACAATGAAATTAACAATGACGATGAAGAGGATGACGATGATCAAAATTTTCTCCCAAACGTGCAGATGATGCCCGAGTTTCAAAATTTAACTGCTTCTGATCTCACAACATGGTACTCTAATGACGACATCTTTCCAGGATGGGAATTTCAGACAATGCAAGAAATTGCAGCAACTAGTGTTGAAACGAGTGCCATAGTTGAAGATGAGGAGGAAGAAGAAGAAGAACAACAA…
GR	GR_TdChr004.2	ATGTACGAGTTTTGGAAGATCGAGAGCGCGAGTGGCTACAAATCGGAGCCAAAACAGCTCCGGGGTACGGAATCGCCTTTGTTCGAAGCAATTTCGCCAGCTTTTTATGTACTGCGAATCTTCGGTCTGGCTCCATATTGTTTTACCAATGACCGATTGAAACCGTCCAATTTTGGATCAGCATTTTCTTTATTTTGGCTCATTGCATACACCTATATTACTGTCGCAACGACGATTCGATTTAGCGGCATCAAACGGGATAAGCCGATTCTTGGAGCGACTGAATATTTTAAGTTGTGTCTAAACTCCTCCGTAGCTGTTTTGGACATCATAGTAACTTGGGCATCAAGGAAAACCTTTTCCGAACTTTGGAACGTTATGCAGGACGTTGATGTAAAG…
GR	GR_TdChr005.1	ATGAATTGCATCTCATTTGCTTATTCTGGGTCTGGAACATTCTACAACATCGTAATTATTTGCCTCCTGTTTATTAGTAACATTGTTGGCATTCATTTTTCCAGTAGTCAAAAACATCCTAAATGGTCTTCTATGCATCGTGTGGCGGATCTGTCGCTGATGACATCTTCGGCAACGGCTGCACTTACCATTTTAATATCAGTGACAGTTAGACAGCGATCGATAGTGAAAATCGCTAATAATTTTGTGAGATGTGACAGAATTATCAAATCAATGGGTGGAGAATCCAAAAGTGAAATTTTTTTTAGTGCTGTGGTGTGTTTGATATACTTTGTGTCTTGGGCAGGGATCTTAAACAGCGCAAAACCTTGCTTGTTGAATGAGATGAAAATCGCTGCT…
GR	GR_TdChr005.2	TACTTTACACTTCAGCATCTGTTGTTTAAAATTCTTGGCTTAGCACCGTACAATGCTCAAGTTTACTCCGTTATACAAAGTGGCCGTAAAATGAATTTCATCGGATTTGCTTACTCTAGGATAGGAACTTTCTACAACATCTTATTTATTTGTCTTCTGATTACGAGTAATATTGTCGGTATATATTTTACGTACAGTCGAAAAATTCCGAAATGGACATCAACGCATCAACTTGCAAATCGTTCGCTAATGATCACTTCAGCAACGACCGCACTTACCATTTTAGTAACAATGACTTTAAAACAACGAATTCTAGTGCAAATTGCAAATAATTTGGTTAGGTGCAACAGAATACTAAAATCTATGGGTGGAAAACCCAATAGTGAAATCCTGTTTAGT…
GR	GR_TdChr005.3	ATGTCTATCAAAAGTAATGAATTTAGTGCAAAAAAATGGGAATATTCTTCCGATTCTCTGTTTGAATATTCTTGGCAAGGTTCAGTCTACAACATATTGCTGATCATCATTTTAATTGGAACGAATGCAATCGGGATTCCGAACGTTTATAACGTGGAATATTTTGGCAAAAGAAAAGTTAACCAATTTATCGATACCATGCTGATGACACTAGGGGTTGTTGCTAGCATTTCAGTTCTCATCACATTTATAATTCATCAGAAGGCTGCTATTGAACTAGCTAACAACATATACGGAATAGAACGTAATTTAATGTTTCTAACCGATAAATACGAAAAGGCACCAGTGGTGTTATACGTTGTTTTAACGTGTTTAACGAATTTCGAATTATGGCTGAAC…
GR	GR_TdChr005.4	AAAATCCTTGGTCTCGCCACTATGTCATTAAAAAAGGATAACATCCTTGTTAGTGCTACAAAAGGAGACTTAATTATTTTTGCATATTCGTACTGGGGTTCAGCATACAATATGCTGCTAATTTTTGTCATAATTTTTGTCTATTCGTATGTGGCTCCTGTAATGTATAATCAAAAATATCTTGGAAAAAGAAAAATAAATCAAGTAGTCGATACCGCGCAATTAACAATAGGAGTTATCGCAAGTGTTTCAGTGCTGACGAATTTTATTGTTTATCAAAAAAGTGTTATGAAAATAGTTAATAAATTGCTTGCGATTGAACGAAATCTATTCTCTTTAACAACTATGTATGATCGACGGGCAGCGATTAATGCCGTTGTCTTCATTTTTGTTACCAAT…
GR	GR_TdChr005.5	TCAAGAATCATTTTTCGAATCTTCAAAAGTGTGGGCCTTGCCACAATGTCTATCAAAAGTGATGAATTTAGTGCAACAAAATGGGAATATTCTTCTGATTCTCTGTTTGAGTATTCTTGGCAAGGTTCAGTCTACAACATATTACTGATCATCGTCTTAATTGGAACGAATGCAATCGGAATTCCGAACGTTTATAACGTGGAATATTTTGGCAAAAGAAAAGTTAACCAATTTATCGATACCATGCTAATGACATTAGGGGTTGTTGCTAGCATTTCAGTTCTCATCACATTTATAATTCATCAGAAGGCTGCTATTGAGCTAGCTAACAACATTTATGGAATAGAACGTAATTTAATGTTTCTAACTGATAAATATGAAAAGGCACCAGTTGTGTTA…
GR	GR_TdChr005.6	ATGTTGGGACTTGCAACGATAAGTGTTTCTATGAATAAAAGTGGTGTTAATGACAGACATGGAAATTATTCTATCGAATTCAAAGACTCGTTAATGGGCACCATATATAATGCAGCATTGGCCATCATTAAAGTAGTTTTGGGAATTGTAGGATTTGCGCGGACTTTGCATACAGAGTCAATGATTAATAAAGTGGCTCATGCCATTCAAACATTGTTGGGAACTGTAGCTACCGTTTTGATACTGTTACATTTTGGCTTTATGCAAAAATCAATTGCTCCGATAGCTAATAGAATAGTTGTTATCCAACGTGATCTGGCTTTTTTAAATGAAAAACACAACAGTAGGCCTTTTAAAAGAACACAACAAATTTTACGTCATTCCATTAAAATTCCTTTG…
GR	GR_TdChr005.7	ATGTACTTTTCTGACAGGAGAATAACAAATGTATTGAACTGGACTACTTATATCGATATAAAAATGTTAATAAAAAAGAAAAGATCAGCAAATGGAATATTCTCCAAAAAGTTCTCCTTCGGGATCAACCATAAAGTTAAATCTGGTAGAAATAGCAGCAGTAATAACACCGAAGTCCATCCATCAGTTTCGGCAGTTAAGAACAGTCCATTGTTTCGAAAACGCAGTTTCCAAAATAATAGAAACGAGACTCTGGAGACGACCGATCCTGAAAGTTTTCATCGTGCAATTGGAACAACATTACTAATAGCTCAGTACTTTGGATTACTCCCCATCTGCAACATACGTGCTCATAGTCCAAAAAAATTTACTTATAATAGATTCGCTCCTAGGACCGTA…
GR	GR_TdChr005.8	ATGCTACGAATAAAAGACGTTGAAAAAGCAACACTTCCGATGTGTATATGCAATTGGATCTTGGGCATAGGAATCGTCGAATATCCAATGGGAACAGAATGGCCAATTTTGAGTACTTTTTATTCATTTTCTTTAGTTTGCATATACTGTATCATAAGTAGTATAGCTTATTCAAATGCCCATCTAATGAGCATTACAAGAGCCGCTTATAATGGCGAAACTATTTTTAAAATTATATTAGTTGGCAACATCATTTTAACTGTCAATAGCATCGTGTTAGGAAGAAGACAAGGAAAGGGTATACAGGATTGTATTCGGAGGACAATTATAATTAGCCATTTACTAGAAGAACTTGGTATTCCCCCCAATTATAAACACATATTATGGGGCCAAATTTTG…
GR	GR_TdChr006.1	ATGACTACCGAGAAAAGCGAAACATTAAATGGTAACAGAATGAAGAATTTTAAAAACAAAATCAAGGACCATTTAGGAATCGAGTATGAAGGAAAAGAAACACATTTACGAGGTCCAAATTCGCTACTTTATAATGCAATTTGCCCTATGATATACGTGATTCGGGTCTTTGGATTAGCTCCATACACGTTCTCGAAAGATTTACTCGTTCCGTCAAATTTGAATTCTATTTTTACTATAGTGTGGTTTCTTGTTTACACATTCATCTTAGTCGAGTTTCTACTGCGAAATACAGAGAAGCGGAGACTTGTCCTTACGATAACTGAAAATGGAAAGTTGATTTTAAACTACTGTGTGATTATAAGTGACATATTCGTAACCATTTTTAAAAGAGATCAG…
GR	GR_TdChr006.2	CAATCACCTTTAGTTGAAGCTATTATGCCAATTGTATATGCAATAAGAGTTTTTGGCCTTGCTCCTTATACTTTTGAAGGAGATCGTCTTGTACCTTCTAATATTAATCAGATTTTTTCAGTCATTTGGGTATCTATCTATTTATATATACTGGTGCATTATTTTATCAGAACCGAAAATGACAGTGATTTAGATAAATCTCTTTTGGGAGTTACAGAAAAAGCAAAAATGTCTTTGAATTTCTTCTGGATGTTAATGGACGTTTTGACCACGGCTTTATCAAGACACCGTTTTTCAGAAGTATTCAATTCTATTCAAGATTTCGATGAACATGTTCGGAACCTAAATTGTCCCAGACAAGAAACCATTACTAAATATTGGGTTCGAGTGGTTTTAATT…
GR	GR_TdChr006.3	TTGTTCAAAATGTTGGGTCTCGCTCCTGTATCCACCAATGAGTTCCCAATTACAAAAAAATGTGAAGTCACCTCACCTTCATTCGAGTATGCTGGAAGTGGCAAAATTTACAACATCGCCTTGATTTTATTTCAACTGGTACTTGGAACACTGGCCGCTCCTCACATTATTGTTTTAAAATTCGAGGGAAAAACAAAGATAAACGAAGTGATCCAAACAATCCACTTTATTCTGTTAATTATTAGTAGTAGTATAGTTTTATGCTGCTTCACAATAAATCAAAAGTCAGTGGTTCGAGCATGCAATGAATTGGCCAAGATGGAAAGTGATTTGATGACTTTGAGCAAATCGTATAATCGACGATCGTTAGTCAAATACGTAGTATTAAATTCTTTTATT…
GR	GR_TdChr006.4	ATGGCATTTTTAATATCGTCCGAATGGGGACCAGTCATTTTTAAAACGTTGTATTACTTTTTTAAAACTCTGGGTCTCGCATTGATGAATGTCACTTATCGAGTTTTACGTACAAAGTACTCCCTAACATTTGAGTATTCTAGAAATAGCGTATTCTATAGCCTCCTTTTAATTGGGATTCAAGTGGTACTTGGTGTACTTGCTGTCCCACGGGTATTTGTGCTTAAGTATAAAGGCAAAACGAAGATAAATCAGCTCATCGAAACAACGCAGATGATTATGGCAATTATAGTCAGCATTGCTATTATAGCCCATCATTGCATTAACCAGAAAAATGCTGTCCGCGTAGCTAATCGAATATGCAGCATCGAAAGTGCTGTACAAAAATTAAGCGATGAA…
GR	GR_TdChr006.5	ATGGTTCGAATTGCAAATAATTTCTTGAAGTGTCATCAAATTTTAGAAACATTAACTGCGAAATCTCTAACAGCTACATCTCTATTTTTATTCACTATTGTGGTCGAATTGATAAATATAGGCCTTACGATTGTTACAATGCTCAGTGCGAAACCGTGCCTTCTAAATGAAGCCAAAATAGCAGCATATATAATGACAATTGCCGTGATAAACTGGTTCGTTACAGAATATGTTTTCGTGGTAAAATTTATTTTGGAGTTAATGAAAGAGTTTAATGCAACTCTGCCTTATATAAATATCAGTTTTGCAACCAATTTGAGCATGAAAACAACACCTTTGGTGCGGTTTCCTGGCAAACGTAGTCTGACGTATTTCCGCGAGCTGCATTCTTTACTGTGT…
GR	GR_TdChr006.6	AACAATCGGTATTTCCTCAAATTGATTTTTTATATTTTCAAAATTTTGGGCCTGGCAACTATTGCCACAACCAATGAGAACTTTCCCGAGAAAACTTGGAAGCGGAATTCAAAACTCTTCAGACAGTCATTAGCGGGTATTTCATACAATGGGTTATTGCTGGTTTTCCAGATTGTTGCCGGAAGTCTTTCCTTCCCGCGTATTTATAATAACGTTTACAGTGCTGACATGCCTATGAACCAAATGGCCAACATGATTCAAACGAGTTTGTGTTTGATGACAACTGTTTGGATACTGATCAGTTTTTGCATCTACCATAATCACGTGGTTCAAACTGCCAATCGGATAAACACAATCGAACATAACCTCTCAATTTTAAACGATAAATATGATCGGAAA…
GR	GR_TdChr006.7	ATGAAGATCATTCGGAAAATAGAACTGACGAAATTGCAGTATTTAAAATGTATTATACTGTTTTTCAAAGTGTTTGGGCTAGCGTCGATTTCGATAAAAGACAAAAAAGTTGTAGACAAAGCATGCGGTCGTTCACCGTACGTAGGTCGCTCGTGCTTTTCTTCATTCTACAGCGTTAGTTTGATTTGCGGAATATTTATTGTCAATTGGTTTTTGAATTGGAAAATGGAGAAACCATCTTCGATTTTATACCAACTGGTTAATTACTCTTATACATTTTGTGGCGTCATCAATTCGGCTATAGTACTACTTTACTTCGTGTACTATACCAAACCGTTGATCAAATTGATCGTGAATATATACGAGCTTGAACAAAGAGTGAAGGATGTTACCGACTAC…
GR	GR_TdChr006.8	ATGTCACCAGAGCAAAGCAACAGAACGGTAAACATATATTATGCTTCAGCAGTGCGGAGCAATTTTCCATTTGACAAGTACGTTACCCAGCCACATGTAAGGCAGAAACCTATATTTGAAGAAACCGTGAAGACCGTCTACTTCCGCTCAATATGTGCGTTCAAGGACGCCGCCTGCACTATTATAAGGCAAAATGATGCTTTCTATGCGACGCATGCGGAAACCACGATAACATCACTCGAGTGGAGTGAAATTAGCAGCAATCGGCTTTGGCTCTTGAGGAAGTATAAAAAATCCTGCAAAATGCAAGAGATTCATTACTTGAAAATCGTTTTGAGTGTTTTTAAATTCCTGGGTCTCGCGGTAATGGACGTCGAGGAAAAGAAACCCAGGAAAAGA…
GR	GR_TdChr006.9	ATGAGAAATAGAAAGTACAACAAACGGTACGTGCAATTCGTATACAATTTTTTTAAATTCCACGGACTGGCACCGTTCGTCGTTAAAAAAGTACCAGTAACCAAAAGTTCCAGAAATAATTGCCAAATCGTTTTTGAGTGTTCCTGGAGAAGCATAATTTACAATATTTCCCTAGCCTCTGCTATAATTATTACAAATTTCTTCGCCATTCCAATGGTGTACAAGAAAAGATACATAGGATGGACACCTTTTTATCAGTTCATGGATGTTTCTCTGATGGTTTGCGGTGTAACATTTGCTGCTTTGATTTTATTGTCTTTTTGCATTCAACAAAAATCGATTATCGCTGTTGTAAACGATTTATACAAGTGTGGAAATATGTTGGAAAAGTTGATCAAA…
GR	GR_TdChr006.10	ATGGGTATACCTGCATCGTATTATTATCGATACGTAGGGTGGATCCTCGCTTACCGAAACTTGGATTTTTTGATGATGTTATTCGCTGCGAGCTTTGGAGTTTTTATTTTATTTACTTTTTGCATCAATCAACGAAATTGTGTTAACATTTGCAACAATTTATACAAGTGCAGTAACATTTTGGGAAATTTAAGTGGCAAGAATCTAAGTGCACCTAAAGCAACATTGAGTGTTATCATTGGTGTCATTAATTTAGTGATTTGGATGATCTTCGTTGCCAGCGGATCAGCATGCATGACCCATGAAGCAGATATTTTAGGCGCGTTTTTCACATCGATTTTTGTTATGAACTGGTTATTCATAGAATATTTTTTAGTAATAACCTTTATTCTATCATTA…
GR	GR_TdChr006.11	GTTTATTCTGTTAAAGGGAATGTGTACAACATATTCGTGTGCATCGTATTAATAGGAATGTCGTCATACAGTGTTCCTCTTGAATTTCATAAACAATACGACTCAAAACTATACCAAGTCATAGACAGGAGCATTATGACTTTTGGAACCGCAGTGTCAATTTACATTTTATTAACAAATATTATTCGACAAAAATTTGCCGTACAAGTGATCAATCACATCTACGACATTCTTGAAACTTTTGATAGCTTGCACATCGACTACGATTGGAAAACACATGCTAAAGTTGACGTTCTAATTTATGGATTTAATTTTATTATTTGGGTTTTCATATTTTACAGTGGCCTTCTAAGTTACTCGGATAAAACTTCCGTATTTCTCGCAACTCGACCTCCAATT…
GR	GR_TdChr006.12	ATGCCTCTATTACGAGTTGGTCCTAATCCAAATCGATGTTTTTTATTCCTCTTCCTGACGTTTAAAATTTTGGGACTATCGACTTTCAACATAAAGTCACAAAAGAAGGGGAAGAGAGTTATCGAAACTTCTAAGGTCGGTGTGGTTTACAACATGATCTTAATGAGCATTCTAATAGCTGCTAATGTTTTTGGCATAAACTACGTTTACAATTTGAAATATCGGTTATGGACCAAAATTTATCAACTTTTGGACACATTTCTGATGGCGGCCTGCATAGCAATTGTGGTTCAGTTACTAGTAACTTATTCCGTTAGGCAAAAACTTGTGGTTCGTTTAGTTAACAAAATCTACGTATGTGGAAAAAGTCTGAAAACCTTTAATAACGATTATCACCAA…
GR	GR_TdChr006.13	ATGGTATTTCATGCCAGTAACGTGTGTTTTATTATCATTTTCTATTTTCTAAAAATTCTCGGTTTGGCTACATTCCAACTTGACAGATTATCAATTTCGAGAAAAGTAGAGAGTAAGTGCGTTATCACCTTCAAAACGTCTCGTACAGGTGTCGCATACAATGTGCTGTTAATAGTGATTTTACTTGGTTTGGGCGTTATTGGATTGCCGTATGTCGATGGCAAAAGGCATAAAAATTGGAATGCCACATATCGAACACTGGATATTTTTACAACAGCTGCTGGAATAATTGTTGCTGGACAAATGTTGATAACATTTATACTACAGCAGCAATACATTGTTAAACTGATCAATGAAATTTCGGGGATCGAGAGATCTTTAAGATTGTTGAATGTTCAT…
GR	GR_TdChr006.14	ATGTTGAGCTTTCATGTAATTTCTAATTTGATAATCAATTGGATGCTGATGCAATATCTCTTCTTCATACGGCTGATTTACGAATTGTTGAAAGCTGTTAATAAAACTTTATTACTCATGGATAAAGGCCAAAATTCTATTCCATTTTTTCAACGAAGTATTTATCTACCAATGCAGTTTTGGACTCCGGAAATTGTAGTACCTGCTGTACGCGACGCACATTTCAAATTATATGAGACTGCTCGACGTACATCAAGATTTTACAATTTTTTAAGTTTGGTCTCTGTTACTTGGGTATATAGCACTTTGCTCGTGAATACTTACCAAGCTTTAATTCCGATGGCAGGGAAAGCAAATCGGATCAGCAACATTCAACTTCTCGCTTTTGCTTATATTTTA…
GR	GR_TdChr006.15	ATCCTATTTTACACTTTTAAAACAATAGGACTTGCAACTATGAGTGTCGTGCAGAAAAGCAAGACCAGACCGACTGAATTTGTGTACTCTAAAATCGGCATAGTTTACAATTGCATTTTACTAGTGATTCTCCTCCCATTATGTTGGGCAGGAACCTACTATACGTACATTGACAATAGTTACCTTGAAATGTCGAGATTCATGCATACTGTGGGATTAATTACGACAATATTCTCTGGAATAATTACTTTATATATCATGATCACTTACTGCGTAAAGCAACAGTCATTTATTTCATTAGCGAATAAAGTCCAAAAAATCGAACGCCACCTTAAGTATTTGAGCCCACAGTACCATCGTGGACCTTGTGATCGATATGTCGCAATTGTTTTTTCAATA…
GR	GR_TdChr006.16	AGAGACACAAATACGTTCGCGAGCTCTAAAATGTTATTTTTATTCTTCAAAACGTTTGGGCTTGCAACTTTTACGAGGACCAAAAACCCCTTATTTCACAGATGCAATGATGTTTCTATCATCTTTAAGCATTCATATCTCGGCATAGTGTACAATTTATTAATAGTTACAATCCTAATTACGATAGGGATTACCAATATTAAATATGTAGCTTTGAATGTTTATTATTACCAAACAGAAAATATGACTTTAACTGTTGCCCGCGTGGGACAGCTTGTGTTTGCGTGTAGGATGTTTTCCAGTATATTCGTCTTACTAGTATTTTGTATAAAACAAAACTCAATCGTAAAAATAGCCAATAAAATTTCAGAAATTGAGAACACTGTGAAAGTATTGAAC…
