# Supplementary material for: Coordinated molecular and ecological adaptations underlie a highly successful parasitoid
Source: eLife. 2024 Jun 21;13:RP94748. doi: 10.7554/eLife.94748 (PMC11192535; doi:10.7554/eLife.94748)
Supplement: Supplementary file 6. [file elife-94748-supp6.xlsx]

## Sheet: Supplementary file 6
Supplementary file 6 Primer sequences in this study
Primers used for TdTimp trangenic flies (5'-3')
TdTimp1 F	ATGACAGCTTGTAAAAAATACG
TdTimp1 R	TTATTTTGGACTTTGAATGCATT
TdTimp2 F	ATGATGGCGTACAATACAAAAG
TdTimp2 R	TTAATACAAAATGATTAGTGGTTC
Primers used for quantitative real-time PCR (5'-3')
GR TdChr005.7 F	CGAATCCTTTCTCGAGACGTAT
GR TdChr005.7 R	TGTCGTTGTCAACTTGTTTGAC
GR TdChr005.8 F	GGATCTTGGGCATAGGAATCG
GR TdChr005.8 R	TGTCTTCTTCCTAACACGATGC
GR TdChr006.2 F	ACCACGGCTTTATCAAGACAC
GR TdChr006.2 R	GAAACTGATGCACCAACGTAG
GR TdChr005.3 F	GGCTGCTATTGAACTAGCTAAC
GR TdChr005.3 R	TATTCACCGTTTGCACCATGT
GR TdChr006.15 F	GACCAGACCGACTGAATTTG
GR TdChr006.15 R	ATATCGATCACAAGGTCCACG
GR TdChr006.14 F	TTGTGTTTGGCTACTGTGCAC
GR TdChr006.14 R	ATGTACGTCGAGCAGTCTCATA
Td tubulin F	TCGCCCAAGGTATCTGACAC
Td tubulin R	TGAGGGAGACGAGGTGGTTA
Primers used for parasitoid COI amplification (5'-3')
CO1LCO1490F	GGTCAACAAATCATAAAGATATTGG
CO1HCO2198R	TAAACTTCAGGGTGACCAAAAAATCA
