# Supplementary material for: Coordinated molecular and ecological adaptations underlie a highly successful parasitoid
Source: eLife. 2024 Jun 21;13:RP94748. doi: 10.7554/eLife.94748 (PMC11192535; doi:10.7554/eLife.94748)
Supplement: Supplementary file 7. [file elife-94748-supp7.xlsx]

## Sheet: Supplementary file 7
Supplementary file 7 Transcriptome sequencing data in this study
Sample	Total size	Read length
Mixed sample for full-length sequencing
Mixed samples	49169536476	1-10k
Female adult	5470297641	1-2k
	6394180929	2-3k
	6409895312	3-6k
Expression profiling by Illumina sequencing
Developmental stage
Egg	7557450300	2 x150bp
Lavae stage1	6409171200	2 x150bp
Lavae stage2	11290108800	2 x150bp
Lavae stage3	11599074600	2 x150bp
Pupae stage1	11020480500	2 x150bp
Pupae stage2	6690975000	2 x150bp
Pupae stage3	13547246100	2 x150bp
Female adult	13444558200	2 x150bp
Male adult	12549936900	2 x150bp
Tissues
Female abdomen	6662319000	2 x150bp
Female antenna	6796539300	2 x150bp
Female head	5895256800	2 x150bp
Female leg	6634988100	2 x150bp
Female thorax	6788849100	2 x150bp
Male abdomen	6296801700	2 x150bp
Male antenna	6911607600	2 x150bp
Male head	6341283300	2 x150bp
Male leg	6614970900	2 x150bp
Male thorax	7121230200	2 x150bp
Teratocyte	7126217400	2 x150bp
Venom	7054974484	2 x150bp
Ovary	8791812000	2 x150bp
Ovipositor	6085248402	2 x150bp
