# Supplementary material for: Coordinated molecular and ecological adaptations underlie a highly successful parasitoid
Source: eLife. 2024 Jun 21;13:RP94748. doi: 10.7554/eLife.94748 (PMC11192535; doi:10.7554/eLife.94748)
Supplement: Supplementary file 8. [file elife-94748-supp8.xlsx]

## Sheet: Supplementary file 8
Supplementary file 8 Raw data in Figure 1—figure supplement 1D
Data of ralated species: Aphelinus varipes, mean genome size: 355.5 Mb, mean length of karyotype chromosome: 15.16 µm (Gokhman et al., 2017, Comp Cytogenet)
Data of Td
Chromosome	mean length of karyotype chromosome (µm)
1	7.8
2	7.5
3	5
4	4.2
5	3.9
6	3.8
Chromosome size of Td = (mean genome size of closely ralated species/mean length of closely ralated species karyotype chromosome) × mean length of Td karyotype chromosome
